# Supplementary material for: Relative Quantification of Several Plasma Proteins during Liver Transplantation Surgery
Source: Hindawi journal article supplement (doi:10.1155/2011/248613), 2011-01-01
Supplement: f1 [file 248613.f1.zip]

Archive with 3 entries (3 files):
- AddFile1_P1-P2.htm
- AddFile2_P1re-P3.htm
- AddFile3_P2re-P3re.htm
