# Supplementary material for: Relative Quantification of Several Plasma Proteins during Liver Transplantation Surgery
Source: Hindawi journal article supplement (doi:10.1155/2011/248613), 2011-01-01
Supplement: f1 [file 248613.f1.zip › AddFile1_P1-P2.htm]

Select Summary Report (AddFile1\_Patient1-Patient2)


# Mascot Search Results

```
Database               : SwissProt 57.7 (497293 sequences; 175274722 residues)
Taxonomy               : Homo sapiens (human) (20405 sequences)
Enzyme                 : Trypsin
Fixed modifications    : Methylthio (C),iTRAQ8plex (N-term),iTRAQ8plex (K)
Variable modifications : Oxidation (M)
Mass values            : Monoisotopic
Protein Mass           : Unrestricted
Peptide Mass Tolerance : ± 0.2 Da
Fragment Mass Tolerance: ± 0.1 Da
Max Missed Cleavages   : 2
Instrument type        : ESI-QUAD-TOF
Number of queries      : 18123

|  |  |  |  |  |  |  |  |  |
| --- | --- | --- | --- | --- | --- | --- | --- | --- |
| Protein hits           : | Patient1-Art/Control | Patient1-Porta/Control | Patient1-Hepa/Control | Patient2-Art/Control | Patient2-Porta/Control | Patient2-Hepa/Control |  |  |
|  | 1.081 | 0.937 | 0.689 | 0.857 | 1.106 | 0.758 | P01024 | Complement C3 OS=Homo sapiens GN=C3 PE=1 SV=2 |
|  | 1.065 | 0.960 | 0.787 | 0.936 | 1.151 | 0.879 | P01023 | Alpha-2-macroglobulin OS=Homo sapiens GN=A2M PE=1 SV=1 |
|  | 0.940 | 0.881 | 0.588 | 1.094 | 1.164 | 0.757 | P02671 | Fibrinogen alpha chain OS=Homo sapiens GN=FGA PE=1 SV=2 |
|  | 0.481 | 0.494 | 0.310 | 1.283 | 1.489 | 0.848 | P02652 | Apolipoprotein A-II OS=Homo sapiens GN=APOA2 PE=1 SV=1 |
|  | 1.013 | 0.938 | 0.626 | 1.137 | 1.382 | 0.897 | P02647 | Apolipoprotein A-I OS=Homo sapiens GN=APOA1 PE=1 SV=1 |
|  | 1.195 | 1.124 | 0.783 | 0.782 | 0.873 | 0.611 | P04114 | Apolipoprotein B-100 OS=Homo sapiens GN=APOB PE=1 SV=1 |
|  | 1.349 | 1.066 | 0.805 | 0.795 | 0.863 | 0.545 | P01011 | Alpha-1-antichymotrypsin OS=Homo sapiens GN=SERPINA3 PE=1 SV=2 |
|  | 0.966 | 0.955 | 0.666 | 0.890 | 1.092 | 0.704 | P00450 | Ceruloplasmin OS=Homo sapiens GN=CP PE=1 SV=1 |
|  | 1.078 | 0.949 | 0.680 | 0.959 | 1.169 | 0.835 | P02675 | Fibrinogen beta chain OS=Homo sapiens GN=FGB PE=1 SV=2 |
|  | 0.993 | 0.870 | 0.591 | 0.945 | 1.142 | 0.762 | P02679 | Fibrinogen gamma chain OS=Homo sapiens GN=FGG PE=1 SV=3 |
|  | 0.937 | 0.876 | 0.559 | 1.145 | 1.333 | 0.778 | P02774 | Vitamin D-binding protein OS=Homo sapiens GN=GC PE=1 SV=1 |
|  | 0.737 | 0.619 | 0.589 | 0.800 | 0.879 | 1.607 | P0C0L4 | Complement C4-A OS=Homo sapiens GN=C4A PE=1 SV=1 |
|  | 0.891 | 0.785 | 0.596 | 0.834 | 1.079 | 0.682 | P05155 | Plasma protease C1 inhibitor OS=Homo sapiens GN=SERPING1 PE=1 SV=2 |
|  | 0.838 | 0.765 | 0.586 | 0.964 | 1.037 | 0.679 | P04217 | Alpha-1B-glycoprotein OS=Homo sapiens GN=A1BG PE=1 SV=3 |
|  | 2.124 | 1.426 | 1.249 | 0.996 | 1.180 | 0.863 | P02763 | Alpha-1-acid glycoprotein 1 OS=Homo sapiens GN=ORM1 PE=1 SV=1 |
|  | 0.833 | 0.770 | 0.632 | 0.778 | 0.989 | 0.763 | P00751 | Complement factor B OS=Homo sapiens GN=CFB PE=1 SV=2 |
|  | 1.100 | 1.017 | 0.762 | 0.786 | 1.164 | 0.799 | Q14624 | Inter-alpha-trypsin inhibitor heavy chain H4 OS=Homo sapiens GN=ITIH4 PE=1 SV=4 |
|  | 1.001 | 0.860 | 0.661 | 0.792 | 1.067 | 0.700 | P08603 | Complement factor H OS=Homo sapiens GN=CFH PE=1 SV=4 |
|  | 0.760 | 0.743 | 0.542 | 0.875 | 1.092 | 0.719 | P10909 | Clusterin OS=Homo sapiens GN=CLU PE=1 SV=1 |
|  | 1.133 | 0.894 | 0.693 | 1.294 | 1.276 | 0.816 | P02790 | Hemopexin OS=Homo sapiens GN=HPX PE=1 SV=2 |
|  | 0.717 | 0.707 | 0.391 | 1.178 | 1.334 | 0.648 | P01008 | Antithrombin-III OS=Homo sapiens GN=SERPINC1 PE=1 SV=1 |
|  | 0.739 | 0.682 | 0.479 | 0.978 | 1.277 | 0.740 | P02765 | Alpha-2-HS-glycoprotein OS=Homo sapiens GN=AHSG PE=1 SV=1 |
|  | 1.004 | 0.919 | 0.680 | 0.758 | 0.873 | 0.576 | P06727 | Apolipoprotein A-IV OS=Homo sapiens GN=APOA4 PE=1 SV=3 |
|  | 0.940 | 0.852 | 0.604 | 1.039 | 1.186 | 0.796 | P01042 | Kininogen-1 OS=Homo sapiens GN=KNG1 PE=1 SV=2 |
|  | 0.795 | 0.788 | 0.388 | 1.385 | 1.452 | 0.688 | P04196 | Histidine-rich glycoprotein OS=Homo sapiens GN=HRG PE=1 SV=1 |
|  | 1.258 | 1.073 | 0.814 | 0.686 | 0.782 | 0.516 | P01871 | Ig mu chain C region OS=Homo sapiens GN=IGHM PE=1 SV=3 |
|  | --- | --- | --- | --- | --- | --- | P08697 | Alpha-2-antiplasmin OS=Homo sapiens GN=SERPINF2 PE=1 SV=3 |
|  | 0.913 | 0.913 | 0.799 | 1.036 | 1.283 | 0.879 | P04003 | C4b-binding protein alpha chain OS=Homo sapiens GN=C4BPA PE=1 SV=2 |
|  | 0.867 | 0.774 | 0.631 | 0.840 | 1.094 | 0.720 | P02766 | Transthyretin OS=Homo sapiens GN=TTR PE=1 SV=1 |
|  | 0.976 | 0.863 | 0.588 | 1.049 | 1.141 | 0.623 | P04004 | Vitronectin OS=Homo sapiens GN=VTN PE=1 SV=1 |
|  | 0.402 | 0.356 | 0.328 | 0.386 | 3.846 | 0.638 | P68871 | Hemoglobin subunit beta OS=Homo sapiens GN=HBB PE=1 SV=2 |
|  | 0.707 | 0.664 | 0.558 | 0.792 | 1.014 | 0.746 | P01019 | Angiotensinogen OS=Homo sapiens GN=AGT PE=1 SV=1 |
|  | 1.096 | 0.946 | 0.759 | 0.830 | 1.275 | 0.937 | P19823 | Inter-alpha-trypsin inhibitor heavy chain H2 OS=Homo sapiens GN=ITIH2 PE=1 SV=2 |
|  | 0.913 | 0.766 | 0.584 | 0.799 | 1.156 | 0.830 | P02760 | Protein AMBP OS=Homo sapiens GN=AMBP PE=1 SV=1 |
|  | 1.125 | 1.158 | 0.748 | 0.814 | 0.932 | 0.525 | P02649 | Apolipoprotein E OS=Homo sapiens GN=APOE PE=1 SV=1 |
|  | 1.335 | 1.258 | 0.774 | 0.879 | 1.108 | 0.680 | P01834 | Ig kappa chain C region OS=Homo sapiens GN=IGKC PE=1 SV=1 |
|  | 1.214 | 1.089 | 0.903 | 1.283 | 1.352 | 1.075 | P02656 | Apolipoprotein C-III OS=Homo sapiens GN=APOC3 PE=1 SV=1 |
|  | 0.737 | 0.849 | 0.570 | 1.010 | 1.199 | 0.733 | P00734 | Prothrombin OS=Homo sapiens GN=F2 PE=1 SV=2 |
|  | 0.816 | 0.575 | 0.648 | 0.817 | 0.816 | 0.691 | P19827 | Inter-alpha-trypsin inhibitor heavy chain H1 OS=Homo sapiens GN=ITIH1 PE=1 SV=3 |
|  | 0.691 | 0.762 | 0.523 | 1.052 | 1.206 | 0.687 | P27169 | Serum paraoxonase/arylesterase 1 OS=Homo sapiens GN=PON1 PE=1 SV=2 |
|  | 0.771 | 0.772 | 0.476 | 0.934 | 1.193 | 0.636 | P51884 | Lumican OS=Homo sapiens GN=LUM PE=1 SV=2 |
|  | 0.888 | 0.752 | 0.582 | 0.797 | 0.972 | 0.744 | P25311 | Zinc-alpha-2-glycoprotein OS=Homo sapiens GN=AZGP1 PE=1 SV=1 |
|  | 1.028 | 1.179 | 0.792 | 0.776 | 1.200 | 0.804 | P01842 | Ig lambda chain C regions OS=Homo sapiens GN=IGLC1 PE=1 SV=1 |
|  | --- | --- | --- | --- | --- | --- | P02735 | Serum amyloid A protein OS=Homo sapiens GN=SAA1 PE=1 SV=2 |
|  | --- | --- | --- | --- | --- | --- | P10643 | Complement component C7 OS=Homo sapiens GN=C7 PE=1 SV=2 |
|  | --- | --- | --- | --- | --- | --- | P00747 | Plasminogen OS=Homo sapiens GN=PLG PE=1 SV=2 |
|  | 0.823 | 0.805 | 0.546 | 0.947 | 1.183 | 0.706 | P01860 | Ig gamma-3 chain C region OS=Homo sapiens GN=IGHG3 PE=1 SV=2 |
|  | --- | --- | --- | --- | --- | --- | P01876 | Ig alpha-1 chain C region OS=Homo sapiens GN=IGHA1 PE=1 SV=2 |
|  | --- | --- | --- | --- | --- | --- | P01031 | Complement C5 OS=Homo sapiens GN=C5 PE=1 SV=4 |
|  | --- | --- | --- | --- | --- | --- | P43652 | Afamin OS=Homo sapiens GN=AFM PE=1 SV=1 |
|  | --- | --- | --- | --- | --- | --- | P05156 | Complement factor I OS=Homo sapiens GN=CFI PE=1 SV=1 |
|  | --- | --- | --- | --- | --- | --- | P07357 | Complement component C8 alpha chain OS=Homo sapiens GN=C8A PE=1 SV=2 |
|  | --- | --- | --- | --- | --- | --- | P06681 | Complement C2 OS=Homo sapiens GN=C2 PE=1 SV=2 |
|  | --- | --- | --- | --- | --- | --- | P02655 | Apolipoprotein C-II OS=Homo sapiens GN=APOC2 PE=1 SV=1 |
|  | 0.699 | 0.696 | 0.470 | 1.285 | 1.442 | 0.805 | P02749 | Beta-2-glycoprotein 1 OS=Homo sapiens GN=APOH PE=1 SV=3 |
|  | --- | --- | --- | --- | --- | --- | P36955 | Pigment epithelium-derived factor OS=Homo sapiens GN=SERPINF1 PE=1 SV=3 |
|  | --- | --- | --- | --- | --- | --- | P04264 | Keratin, type II cytoskeletal 1 OS=Homo sapiens GN=KRT1 PE=1 SV=6 |
|  | --- | --- | --- | --- | --- | --- | Q9NP78 | ATP-binding cassette sub-family B member 9 OS=Homo sapiens GN=ABCB9 PE=1 SV=1 |
|  | --- | --- | --- | --- | --- | --- | P05452 | Tetranectin OS=Homo sapiens GN=CLEC3B PE=1 SV=2 |
|  | --- | --- | --- | --- | --- | --- | P05546 | Heparin cofactor 2 OS=Homo sapiens GN=SERPIND1 PE=1 SV=3 |
|  | --- | --- | --- | --- | --- | --- | P15169 | Carboxypeptidase N catalytic chain OS=Homo sapiens GN=CPN1 PE=1 SV=1 |
|  | --- | --- | --- | --- | --- | --- | O95678 | Keratin, type II cytoskeletal 75 OS=Homo sapiens GN=KRT75 PE=1 SV=2 |
|  | --- | --- | --- | --- | --- | --- | P02538 | Keratin, type II cytoskeletal 6A OS=Homo sapiens GN=KRT6A PE=1 SV=3 |
|  | --- | --- | --- | --- | --- | --- | P35908 | Keratin, type II cytoskeletal 2 epidermal OS=Homo sapiens GN=KRT2 PE=1 SV=2 |
|  | --- | --- | --- | --- | --- | --- | P04278 | Sex hormone-binding globulin OS=Homo sapiens GN=SHBG PE=1 SV=2 |
|  | --- | --- | --- | --- | --- | --- | P02746 | Complement C1q subcomponent subunit B OS=Homo sapiens GN=C1QB PE=1 SV=2 |
|  | --- | --- | --- | --- | --- | --- | P06396 | Gelsolin OS=Homo sapiens GN=GSN PE=1 SV=1 |
```

|  | SwissProt | Decoy | False discovery rate |
| --- | --- | --- | --- |
| Peptide matches above identity threshold | 1806 | 11 | 0.61 % |
| Peptide matches above homology or identity threshold | 2244 | 33 | 1.47 % |

### Select Summary Report

|  |  |  |  |
| --- | --- | --- | --- |
|  | Peptide Summary Select Summary (protein hits) Select Summary (unassigned) Export Search Results |  | Help |
|  | Significance threshold p< | Max. number of hits |  |
|  | Standard scoring  MudPIT scoring | Ions score or expect cut-off | Show sub-sets |
|  | Show pop-ups  Suppress pop-ups | Sort unassigned  Decreasing Score Increasing query / Mr Decreasing Intensity | Require bold red |
|  | Protein ratio type  Average Median Weighted | Normalisation  None Average ratio Median ratio Summed intensities | Help |
|  | Report peptide ratios | Outlier removal  None Automatic Dixon's method Grubbs' method Rosner's method | Min. # peptides |
|  | Min. precursor charge | Peptide threshold  Minimum score of Maximum expect of At least identity At least homology |  |


|  |  |
| --- | --- |
| **1.** | P01024    **Mass:** 222951   **Score:** 12638  **Queries matched:** 655   **emPAI:** 3.97 |
|  | Complement C3 OS=Homo sapiens GN=C3 PE=1 SV=2 |

|  |  |  |  |  |  |
| --- | --- | --- | --- | --- | --- |
|  | **Quantitation:** | **Ratio** | **Weighted** | **N** | **SD(geo)** |
|  |  | Patient1-Art/Control | 1.081 | 296 | NN |
|  |  | Patient1-Porta/Control | 0.937 | 296 | NN |
|  |  | Patient1-Hepa/Control | 0.689 | 292 | NN |
|  |  | Patient2-Art/Control | 0.857 | 295 | NN |
|  |  | Patient2-Porta/Control | 1.106 | 295 | NN |
|  |  | Patient2-Hepa/Control | 0.758 | 295 | NN |

|  |  |  |  |  |  |  |  |  |  |  |  |  |  |  |  |  |
| --- | --- | --- | --- | --- | --- | --- | --- | --- | --- | --- | --- | --- | --- | --- | --- | --- |
|  | **Query** | **Observed** | **Mr(expt)** | **Mr(calc)** | **Delta** | **Miss** | **Score** | **Expect** | **Rank** | **Patient1-Art/Control** | **Patient1-Porta/Control** | **Patient1-Hepa/Control** | **Patient2-Art/Control** | **Patient2-Porta/Control** | **Patient2-Hepa/Control** | **Peptide** |
|  | 488 | **425.27** | **848.53** | **848.54** | **-0.01** | **0** | **19** | **0.89** | **1** | **---** | **---** | **---** | **---** | **---** | **---** | **K.TVAVR.T** 485 486 487 |
|  | 1637 | **450.23** | **898.45** | **898.48** | **-0.03** | **0** | **2** | **42** | **1** | **---** | **---** | **---** | **---** | **---** | **---** | **K.AFSDR.N** |
|  | 2433 | **479.76** | **957.51** | **957.63** | **-0.11** | **0** | **12** | **1** | **1** | **---** | **---** | **---** | **---** | **---** | **---** | **K.LLPVGR.T** 2430 2431 2432 2434 2436 2443 2445 2446 2447 2448 2449 2451 2453 2454 2455 2456 2457 2458 2459 |
|  | 2546 | **483.71** | **965.41** | **965.49** | **-0.09** | **0** | **2** | **18** | **2** | **---** | **---** | **---** | **---** | **---** | **---** | **R.ENPMR.F** |
|  | 2825 | **493.22** | **984.43** | **984.47** | **-0.04** | **0** | **21** | **0.53** | **1** | **---** | **---** | **---** | **---** | **---** | **---** | **R.DELCR.C** 2823 2826 2827 2828 2829 2831 2832 |
|  | 2913 | **495.67** | **989.33** | **989.47** | **-0.14** | **0** | **20** | **0.039** | **1** | **0.925** | **0.801** | **0.633** | **0.561** | **1.042** | **0.699** | **R.FSCQR.R** 2912 2914 2915 2916 |
|  | 3439 | **517.77** | **1033.53** | **1033.57** | **-0.04** | **0** | **21** | **0.28** | **1** | **---** | **---** | **---** | **---** | **---** | **---** | **R.TLDPER.L** 3430 3431 3432 3433 3434 3435 3436 3438 |
|  | 3707 | **537.30** | **1072.58** | **1072.65** | **-0.07** | **0** | **25** | **0.067** | **1** | **---** | **---** | **---** | **---** | **---** | **---** | **K.VVPEGIR.M** 3699 3700 3701 3702 3703 3704 3705 3706 3708 3709 3710 3712 3713 3714 3715 |
|  | 4077 | **564.83** | **1127.64** | **1127.67** | **-0.03** | **0** | **40** | **0.0056** | **1** | **0.781** | **0.688** | **0.466** | **0.293** | **1.039** | **0.794** | **R.ASHLGLAR.S** 4074 4075 4076 |
|  | 4150 | **569.33** | **1136.65** | **1136.69** | **-0.04** | **0** | **18** | **1.1** | **2** | **---** | **---** | **---** | **---** | **---** | **---** | **R.LPYSVVR.N** 4146 4151 4153 |
|  | 4208 | **575.30** | **1148.59** | **1148.62** | **-0.04** | **0** | **5** | **14** | **1** | **---** | **---** | **---** | **---** | **---** | **---** | **R.WLNEQR.Y** |
|  | 4352 | **579.79** | **1157.57** | **1157.61** | **-0.04** | **0** | **2** | **19** | **1** | **---** | **---** | **---** | **---** | **---** | **---** | **K.IEGDHGAR.V** |
|  | 4433 | **582.34** | **1162.66** | **1162.69** | **-0.03** | **0** | **1** | **35** | **1** | **---** | **---** | **---** | **---** | **---** | **---** | **R.AHEAK.I** |
|  | 4617 | **596.27** | **1190.52** | **1190.66** | **-0.13** | **0** | **22** | **0.25** | **1** | **---** | **---** | **---** | **---** | **---** | **---** | **R.NEQVEIR.A** 4618 4619 4620 4629 4630 |
|  | 4659 | **601.32** | **1200.63** | **1200.73** | **-0.10** | **0** | **10** | **5.3** | **2** | **---** | **---** | **---** | **---** | **---** | **---** | **K.FGLEK.R** |
|  | 5074 | **632.37** | **1262.72** | **1262.75** | **-0.03** | **0** | **26** | **0.11** | **1** | **---** | **---** | **---** | **---** | **---** | **---** | **K.GLEVTITAR.F** 5076 5081 |
|  | 5345 | **644.85** | **1287.69** | **1287.80** | **-0.11** | **0** | **19** | **1.4** | **1** | **---** | **---** | **---** | **---** | **---** | **---** | **K.FLTTAK.D** 5343 5346 |
|  | 5662 | **670.33** | **1338.65** | **1338.80** | **-0.14** | **0** | **29** | **0.075** | **1** | **---** | **---** | **---** | **---** | **---** | **---** | **R.AEDLVGK.S** 5664 |
|  | 6074 | **692.41** | **1382.80** | **1382.86** | **-0.06** | **0** | **17** | **1.1** | **1** | **---** | **---** | **---** | **---** | **---** | **---** | **K.LVLSSEK.T** 6075 |
|  | 6077 | **692.84** | **1383.67** | **1383.87** | **-0.20** | **0** | **31** | **0.043** | **1** | **2.117** | **1.705** | **1.225** | **1.268** | **1.376** | **1.048** | **K.GVFVLNK.K** 6083 6085 |
|  | 6087 | **694.31** | **1386.61** | **1386.76** | **-0.14** | **0** | **24** | **0.16** | **1** | **---** | **---** | **---** | **---** | **---** | **---** | **K.GYTQQLAFR.Q** 6088 6089 6090 |
|  | 6209 | **468.54** | **1402.61** | **1402.65** | **-0.04** | **1** | **21** | **0.29** | **1** | **---** | **---** | **---** | **---** | **---** | **---** | **K.LCRDELCR.C** 6208 6210 |
|  | 6263 | **705.43** | **1408.84** | **1408.89** | **-0.05** | **0** | **19** | **0.77** | **1** | **---** | **---** | **---** | **---** | **---** | **---** | **K.WLILEK.Q** 6259 6261 6262 6264 |
|  | 6278 | **706.88** | **1411.74** | **1411.85** | **-0.11** | **0** | **28** | **0.1** | **1** | **---** | **---** | **---** | **---** | **---** | **---** | **R.SVQLTEK.R** 6281 |
|  | 6288 | **707.41** | **1412.81** | **1412.89** | **-0.08** | **0** | **31** | **0.061** | **1** | **---** | **---** | **---** | **---** | **---** | **---** | **R.TFISPIK.C** 6283 6284 6285 6289 6290 |
|  | 6303 | **707.89** | **1413.76** | **1413.82** | **-0.06** | **0** | **46** | **0.0022** | **1** | **1.214** | **0.966** | **0.818** | **0.878** | **1.083** | **0.799** | **K.VLLDGVQNPR.A** 6304 6306 6307 6308 |
|  | 6520 | **725.92** | **1449.82** | **1449.94** | **-0.12** | **0** | **46** | **0.0016** | **1** | **1.392** | **1.240** | **0.872** | **1.109** | **1.226** | **0.852** | **R.VVLVAVDK.G** 6521 6522 |
|  | 6653 | **489.60** | **1465.78** | **1465.89** | **-0.10** | **0** | **13** | **3.8** | **1** | **---** | **---** | **---** | **---** | **---** | **---** | **R.IFTVNHK.L** 6648 6650 |
|  | 6759 | **493.98** | **1478.92** | **1478.93** | **-0.00** | **0** | **30** | **0.072** | **1** | **---** | **---** | **---** | **---** | **---** | **---** | **R.QGALELIK.K** |
|  | 6784 | **743.94** | **1485.86** | **1485.92** | **-0.06** | **0** | **(14)** | **3.5** | **1** | **---** | **---** | **---** | **---** | **---** | **---** | **K.LMNIFLK.D** |
|  | 6880 | **747.89** | **1493.76** | **1493.93** | **-0.17** | **0** | **28** | **0.11** | **1** | **---** | **---** | **---** | **---** | **---** | **---** | **R.ISLPESLK.R** 6882 6884 6885 6886 |
|  | 6895 | **748.86** | **1495.71** | **1495.89** | **-0.17** | **0** | **32** | **0.034** | **1** | **1.240** | **1.004** | **0.627** | **0.557** | **1.133** | **0.632** | **K.IWDVVEK.A** 6896 |
|  | 6958 | **751.93** | **1501.85** | **1501.92** | **-0.06** | **0** | **31** | **0.053** | **1** | **1.526** | **1.091** | **0.950** | **0.835** | **1.235** | **0.976** | **K.LMNIFLK.D** 6953 6954 6955 6956 6957 6959 6961 6962 6963 6964 6965 6966 6967 6968 6969 6970 6971 6973 6974 6975 |
|  | 7085 | **505.95** | **1514.83** | **1514.85** | **-0.02** | **0** | **36** | **0.021** | **1** | **1.058** | **0.669** | **0.799** | **1.258** | **0.944** | **0.850** | **R.IHWESASLLR.S** 7086 |
|  | 7281 | **772.40** | **1542.78** | **1542.79** | **-0.01** | **0** | **(22)** | **0.36** | **1** | **---** | **---** | **---** | **---** | **---** | **---** | **K.NTMILEICTR.Y** 7279 7280 7282 |
|  | 7353 | **780.39** | **1558.77** | **1558.78** | **-0.01** | **0** | **43** | **0.0029** | **1** | **0.568** | **0.439** | **0.459** | **0.747** | **0.858** | **0.657** | **K.NTMILEICTR.Y** 7348 7350 7354 7356 |
|  | 7408 | **783.40** | **1564.79** | **1564.80** | **-0.01** | **0** | **36** | **0.014** | **1** | **0.959** | **1.356** | **0.819** | **1.611** | **1.581** | **1.109** | **K.QELSEAEQATR.T** 7406 |
|  | 7537 | **797.36** | **1592.71** | **1592.81** | **-0.09** | **0** | **55** | **9.7e-005** | **1** | **1.192** | **1.272** | **0.846** | **0.821** | **1.004** | **0.762** | **K.SGSDEVQVGQQR.T** 7539 |
|  | 7643 | **537.63** | **1609.88** | **1609.95** | **-0.07** | **0** | **36** | **0.016** | **1** | **1.395** | **1.225** | **1.049** | **1.062** | **1.116** | **0.886** | **K.TGLQEVEVK.A** 7641 7642 7644 7645 7646 |
|  | 7713 | **541.29** | **1620.85** | **1620.88** | **-0.04** | **0** | **47** | **0.0012** | **1** | **1.685** | **1.189** | **1.066** | **1.438** | **1.428** | **1.515** | **R.FISLGEACK.K** 7714 |
|  | 7873 | **546.01** | **1635.01** | **1635.03** | **-0.02** | **1** | **1** | **59** | **8** | **---** | **---** | **---** | **---** | **---** | **---** | **K.RQGALELIK.K** |
|  | 8022 | **830.36** | **1658.70** | **1658.86** | **-0.15** | **0** | **49** | **0.00026** | **1** | **1.701** | **1.522** | **1.029** | **1.098** | **1.286** | **0.971** | **K.ADIGCTPGSGK.D** 8023 8024 8025 |
|  | 8030 | **830.93** | **1659.84** | **1659.91** | **-0.08** | **0** | **15** | **2.1** | **1** | **---** | **---** | **---** | **---** | **---** | **---** | **K.DSCVGSLVVK.S** |
|  | 8210 | **837.95** | **1673.88** | **1673.93** | **-0.05** | **0** | **9** | **8.1** | **1** | **---** | **---** | **---** | **---** | **---** | **---** | **K.TIYTPGSTVLYR.I** |
|  | 8365 | **850.98** | **1699.94** | **1700.03** | **-0.09** | **0** | **51** | **0.00062** | **1** | **1.849** | **1.245** | **1.167** | **0.944** | **1.257** | **0.989** | **R.NTLIIYLDK.V** 8368 8369 8370 8371 |
|  | 8782 | **874.44** | **1746.87** | **1746.94** | **-0.07** | **0** | **21** | **0.43** | **1** | **---** | **---** | **---** | **---** | **---** | **---** | **K.FYYIYNEK.G** |
|  | 8876 | **880.98** | **1759.95** | **1760.01** | **-0.05** | **0** | **61** | **5e-005** | **1** | **0.904** | **0.890** | **0.604** | **1.028** | **1.169** | **0.738** | **R.QPSSAFAAFVK.R** 8872 8873 8874 8875 8877 8879 |
|  | 9054 | **887.98** | **1773.94** | **1773.98** | **-0.04** | **0** | **80** | **5.7e-007** | **1** | **0.923** | **0.972** | **0.621** | **1.055** | **1.085** | **0.657** | **R.IPIEDGSGEVVLSR.K** 9039 9040 9043 9048 9050 9051 9055 9056 9060 9062 9063 9064 9067 9069 9070 9072 9076 |
|  | 9179 | **599.04** | **1794.10** | **1794.19** | **-0.09** | **1** | **8** | **9.4** | **1** | **---** | **---** | **---** | **---** | **---** | **---** | **R.LKGPLLNK.F** 9178 |
|  | 9239 | **900.47** | **1798.93** | **1798.99** | **-0.05** | **1** | **44** | **0.0022** | **1** | **0.728** | **0.660** | **0.505** | **0.682** | **1.047** | **0.714** | **K.SDDKVTLEER.L** 9237 |
|  | 9384 | **606.00** | **1814.98** | **1815.02** | **-0.04** | **0** | **78** | **1e-006** | **1** | **0.803** | **0.619** | **0.495** | **0.710** | **0.625** | **0.571** | **R.LVAYYTLIGASGQR.E** 9369 9370 9371 9372 9373 9374 9376 9378 9379 9380 9382 9383 9385 9386 9387 9388 9389 9390 9392 9394 9395 9396 9397 9398 9399 9400 9401 9402 9404 9407 9408 |
|  | 9411 | **606.05** | **1815.14** | **1815.16** | **-0.02** | **1** | **30** | **0.06** | **1** | **---** | **---** | **---** | **---** | **---** | **---** | **K.KLVLSSEK.T** 9375 9409 |
|  | 9591 | **611.65** | **1831.94** | **1832.00** | **-0.06** | **0** | **36** | **0.014** | **1** | **1.122** | **0.986** | **0.836** | **0.912** | **1.121** | **0.913** | **R.YYTYLIMNK.G** 9590 9592 9593 9594 |
|  | 9736 | **616.33** | **1845.96** | **1846.12** | **-0.17** | **1** | **29** | **0.073** | **1** | **---** | **---** | **---** | **---** | **---** | **---** | **R.KVLLDGVQNPR.A** 9737 9739 9740 9741 9742 |
|  | 9761 | **617.65** | **1849.93** | **1850.05** | **-0.13** | **0** | **35** | **0.018** | **1** | **2.048** | **1.683** | **1.213** | **1.394** | **1.400** | **1.116** | **R.QPVPGQQMTLK.I** 9760 9762 9763 |
|  | 9896 | **628.94** | **1883.79** | **1883.89** | **-0.09** | **0** | **39** | **0.0019** | **1** | **0.655** | **0.659** | **0.462** | **0.579** | **0.897** | **0.611** | **R.CAEENCFIQK.S** 9895 9897 9898 9899 9900 9901 9902 |
|  | 10022 | **633.33** | **1896.95** | **1896.96** | **-0.00** | **0** | **54** | **0.00023** | **1** | **0.791** | **0.784** | **0.576** | **0.704** | **0.991** | **0.681** | **K.ACEPGVDYVYK.T** 10016 10017 10019 10021 10023 |
|  | 10165 | **644.33** | **1929.96** | **1930.08** | **-0.11** | **1** | **55** | **0.00019** | **1** | **1.362** | **1.065** | **0.911** | **1.012** | **1.247** | **0.844** | **K.RIPIEDGSGEVVLSR.K** 10166 10170 10172 10173 |
|  | 10241 | **977.55** | **1953.09** | **1953.10** | **-0.01** | **0** | **85** | **2.1e-007** | **1** | **1.387** | **1.245** | **0.836** | **0.811** | **1.164** | **0.762** | **R.EVVADSVWVDVK.D** 10235 10236 10237 10238 10243 10244 |
|  | 10267 | **980.94** | **1959.87** | **1959.90** | **-0.03** | **0** | **55** | **7.3e-005** | **1** | **1.411** | **0.969** | **0.885** | **0.967** | **1.150** | **0.966** | **K.VYAYYNLEESCTR.F** 10268 |
|  | 10269 | **981.49** | **1960.96** | **1960.96** | **-0.00** | **0** | **52** | **0.00028** | **1** | **1.422** | **1.247** | **1.188** | **0.525** | **0.883** | **0.847** | **K.AGDFLEANYMNLQR.S** |
|  | 10358 | **660.33** | **1977.98** | **1978.11** | **-0.14** | **1** | **17** | **1.1** | **1** | **---** | **---** | **---** | **---** | **---** | **---** | **K.AKDQLTCNK.F** 10359 |
|  | 10479 | **666.68** | **1997.02** | **1997.10** | **-0.08** | **1** | **36** | **0.014** | **1** | **1.122** | **1.177** | **0.727** | **1.295** | **1.247** | **0.771** | **K.KQELSEAEQATR.T** 10478 10480 |
|  | 10513 | **668.95** | **2003.83** | **2003.99** | **-0.16** | **0** | **42** | **0.00081** | **1** | **1.403** | **1.137** | **0.751** | **0.602** | **1.014** | **0.800** | **K.VSHSEDDCLAFK.V** 10514 10515 |
|  | 10550 | **1005.61** | **2009.20** | **2009.24** | **-0.03** | **0** | **74** | **2.6e-006** | **1** | **1.191** | **1.070** | **0.681** | **0.937** | **1.127** | **0.685** | **K.SSLSVPYVIVPLK.T** 10541 10542 10543 10544 10545 10547 10549 10551 10552 10553 10554 10555 10557 10558 10559 |
|  | 10708 | **684.73** | **2051.16** | **2051.15** | **0.01** | **0** | **(8)** | **9.4** | **1** | **---** | **---** | **---** | **---** | **---** | **---** | **K.FYYIYNEK.G** 10706 |
|  | 11116 | **707.40** | **2119.17** | **2119.23** | **-0.06** | **0** | **(19)** | **0.81** | **1** | **---** | **---** | **---** | **---** | **---** | **---** | **R.LVAYYTLIGASGQR.E** |
|  | 11129 | **707.42** | **2119.23** | **2119.23** | **0.00** | **0** | **(25)** | **0.2** | **1** | **---** | **---** | **---** | **---** | **---** | **---** | **R.LVAYYTLIGASGQR.E** 11105 11118 11128 |
|  | 11143 | **1061.03** | **2120.04** | **2120.09** | **-0.05** | **0** | **113** | **2.4e-010** | **1** | **0.885** | **0.863** | **0.602** | **0.995** | **1.100** | **0.742** | **R.SNLDEDIIAEENIVSR.S** 11135 11136 11137 11138 11139 11140 11141 11142 11144 11145 11146 11147 11148 11149 11150 11151 11152 11153 11154 11155 11156 11157 11158 11159 11160 |
|  | 11206 | **709.07** | **2124.18** | **2124.29** | **-0.11** | **0** | **23** | **0.35** | **1** | **---** | **---** | **---** | **---** | **---** | **---** | **K.VTIKPAPETEK.R** |
|  | 11638 | **726.03** | **2175.06** | **2175.23** | **-0.17** | **0** | **45** | **0.0015** | **1** | **1.260** | **0.932** | **0.825** | **1.020** | **1.103** | **0.820** | **R.TELRPGETLNVNFLLR.M** 11640 11641 11645 11647 11649 11650 |
|  | 12278 | **1132.64** | **2263.27** | **2263.27** | **0.00** | **0** | **68** | **1.1e-005** | **1** | **2.205** | **1.710** | **1.299** | **1.372** | **1.439** | **1.155** | **R.TVMVNIENPEGIPVK.Q** 12274 12275 12276 12277 12280 |
|  | 12830 | **796.41** | **2386.21** | **2386.23** | **-0.02** | **0** | **78** | **9.1e-007** | **1** | **0.948** | **1.220** | **1.244** | **0.994** | **1.493** | **1.229** | **K.DICEEQVNSLPGSITK.A** 12822 12823 12824 12825 12826 12827 12828 12829 12831 12832 12833 12834 12835 12836 |
|  | 12857 | **800.09** | **2397.24** | **2397.30** | **-0.06** | **0** | **66** | **1.6e-005** | **1** | **2.289** | **1.730** | **1.350** | **1.253** | **1.401** | **1.101** | **R.VELLHNPAFCSLATTK.R** 12855 12856 12858 12859 12861 12862 12863 12864 12865 |
|  | 13000 | **605.84** | **2419.34** | **2419.37** | **-0.02** | **0** | **38** | **0.0099** | **1** | **---** | **---** | **---** | **---** | **---** | **---** | **K.GQGTLSVVTMYHAK.A** |
|  | 13172 | **814.70** | **2441.06** | **2441.05** | **0.01** | **0** | **(22)** | **0.1** | **1** | **---** | **---** | **---** | **---** | **---** | **---** | **K.QCQDLGAFTESMVVFGCPN.-** 13170 13171 |
|  | 13230 | **817.77** | **2450.30** | **2450.27** | **0.03** | **0** | **69** | **8.1e-006** | **1** | **0.897** | **0.625** | **0.590** | **0.826** | **1.092** | **0.736** | **K.DAPDHQELNLDVSLQLPSR.S** 13204 13205 13206 13209 13211 13212 13213 13215 13218 13219 13220 13221 13223 13224 13226 13228 13229 13231 13235 13243 |
|  | 13358 | **820.02** | **2457.04** | **2457.04** | **-0.01** | **0** | **65** | **3.2e-006** | **1** | **0.309** | **0.466** | **0.344** | **1.101** | **0.566** | **0.474** | **K.QCQDLGAFTESMVVFGCPN.-** 13356 13359 13360 13361 13363 13365 13366 13368 |
|  | 13383 | **821.10** | **2460.29** | **2460.28** | **0.01** | **0** | **(114)** | **2.5e-010** | **1** | **1.028** | **0.457** | **0.672** | **0.614** | **0.944** | **0.601** | **R.ILLQGTPVAQMTEDAVDAER.L** 13374 13376 13379 13381 13384 13385 13389 13390 |
|  | 13400 | **494.07** | **2465.33** | **2465.40** | **-0.07** | **1** | **5** | **21** | **1** | **---** | **---** | **---** | **---** | **---** | **---** | **R.FYHPEKEDGK.L** |
|  | 13474 | **826.42** | **2476.24** | **2476.28** | **-0.04** | **0** | **129** | **7e-012** | **1** | **1.065** | **0.764** | **0.816** | **1.118** | **0.896** | **0.614** | **R.ILLQGTPVAQMTEDAVDAER.L** 13464 13465 13466 13467 13468 13469 13471 13472 13476 13478 13479 13480 13481 13483 13484 13485 13486 13487 13488 13489 13490 13491 13492 13493 13495 13499 13502 13504 |
|  | 13523 | **829.80** | **2486.38** | **2486.38** | **-0.00** | **0** | **49** | **0.00085** | **1** | **0.884** | **0.836** | **0.912** | **0.907** | **0.881** | **0.690** | **K.EYVLPSFEVIVEPTEK.F** 13509 13510 13517 13518 13519 13522 13526 13529 |
|  | 13748 | **840.08** | **2517.23** | **2517.20** | **0.03** | **0** | **53** | **0.00022** | **1** | **2.284** | **0.121** | **2.593** | **0.494** | **0.953** | **0.215** | **K.EDIPPADLSDQVPDTESETR.I** 13747 |
|  | 14086 | **868.16** | **2601.47** | **2601.44** | **0.03** | **1** | **34** | **0.023** | **1** | **0.877** | **0.763** | **0.371** | **0.776** | **0.934** | **0.815** | **K.KVEGTAFVIFGIQDGEQR.I** 14083 14084 14085 14094 |
|  | 14125 | **653.32** | **2609.24** | **2609.37** | **-0.13** | **1** | **34** | **0.015** | **1** | **0.917** | **0.863** | **0.639** | **0.793** | **1.016** | **0.775** | **K.SGQSEDRQPVPGQQMTLK.I** 14126 |
|  | 14684 | **916.82** | **2747.43** | **2747.51** | **-0.08** | **0** | **100** | **6e-009** | **1** | **1.451** | **1.161** | **1.226** | **1.829** | **1.632** | **1.026** | **R.EPGQDLVVLPLSITTDFIPSFR.L** 14680 14681 14682 14683 14685 14686 14687 14688 14689 14690 14692 14693 14694 14695 14696 14697 14698 14700 14701 14702 14703 14705 14707 14714 14716 14717 14718 14719 14720 14722 14723 14724 14725 14727 14728 14730 14731 14732 14733 14734 14735 14736 14738 14739 14741 14742 14744 14748 14758 | **918.86** | **2753.57** | **2753.60** | **-0.03** | **0** | **6** | **14** | **1** | **---** | **---** | **---** | **---** | **---** | **---** | **K.VHQYFNVELIQPGAVK.V** |
|  | 14774 | **920.55** | **2758.64** | **2758.61** | **0.03** | **0** | **35** | **0.018** | **1** | **2.784** | **2.009** | **1.303** | **1.069** | **2.471** | **0.883** | **K.QLYNVEATSYALLALLQLK.D** 14771 14772 14773 |
|  | 14834 | **692.88** | **2767.48** | **2767.46** | **0.01** | **1** | **37** | **0.012** | **1** | **0.659** | **0.673** | **0.560** | **0.860** | **0.925** | **0.726** | **R.SEETKENEGFTVTAEGK.G** 14822 14824 14826 14835 |
|  | 14936 | **933.47** | **2797.38** | **2797.35** | **0.03** | **0** | **126** | **1.3e-011** | **1** | **0.873** | **0.703** | **0.480** | **0.831** | **0.784** | **0.704** | **K.DYAGVFSDAGLTFTSSSGQQTAQR.A** 14926 14928 14930 14931 14938 14940 14942 |
|  | 14956 | **936.17** | **2805.49** | **2805.53** | **-0.05** | **0** | **81** | **5e-007** | **1** | **0.868** | **0.808** | **0.566** | **0.874** | **1.191** | **0.537** | **R.VPVAVQGEDTVQSLTQGDGVAK.L** 14954 14955 14957 14958 14959 14960 14961 14962 14963 14964 14965 14966 14967 14968 14969 |
|  | 15149 | **955.85** | **2864.53** | **2864.51** | **0.02** | **0** | **(78)** | **8.8e-007** | **1** | **0.618** | **0.636** | **0.369** | **0.811** | **1.091** | **0.557** | **K.VQLSNDFDEYIMAIEQTIK.S** 15139 15140 15141 15142 15143 15144 15145 15148 15150 15151 15152 15153 15154 |
|  | 15259 | **721.13** | **2880.51** | **2880.50** | **0.01** | **0** | **90** | **6.2e-008** | **1** | **0.844** | **0.829** | **0.624** | **0.983** | **1.061** | **0.809** | **K.VQLSNDFDEYIMAIEQTIK.S** 15235 15236 15237 15238 15239 15240 15241 15242 15243 15244 15245 15246 15247 15248 15249 15251 15252 15254 15255 15256 15257 15261 15262 15263 15264 |
|  | 16493 | **797.16** | **3184.59** | **3184.71** | **-0.12** | **0** | **(61)** | **3.6e-005** | **1** | **---** | **---** | **---** | **---** | **---** | **---** | **K.VQLSNDFDEYIMAIEQTIK.S** 16494 16495 16496 16498 16499 16501 |
|  | 16520 | **800.85** | **3199.38** | **3199.40** | **-0.02** | **0** | **48** | **0.00014** | **1** | **1.277** | **1.048** | **0.662** | **0.757** | **1.271** | **0.700** | **K.DTWVEHWPEEDECQDEENQK.Q** 16521 16522 |
|  | 16616 | **820.21** | **3276.82** | **3276.82** | **0.01** | **1** | **21** | **0.39** | **1** | **---** | **---** | **---** | **---** | **---** | **---** | **R.NNNEKDMALTAFVLISLQEAK.D** 16612 16621 16622 |
|  | 16713 | **844.20** | **3372.75** | **3372.71** | **0.04** | **0** | **(43)** | **0.0025** | **1** | **0.694** | **0.622** | **0.520** | **0.767** | **1.039** | **0.720** | **K.YFKPGMPFDLMVFVTNPDGSPAYR.V** 16711 16712 |
|  | 16783 | **848.15** | **3388.59** | **3388.71** | **-0.12** | **0** | **(66)** | **7.7e-006** | **1** | **0.951** | **0.810** | **0.677** | **1.053** | **1.174** | **0.662** | **K.YFKPGMPFDLMVFVTNPDGSPAYR.V** 16786 16790 16791 16792 16796 |
|  | 16916 | **861.91** | **3443.61** | **3443.62** | **-0.02** | **0** | **58** | **3.6e-005** | **1** | **1.609** | **1.622** | **1.323** | **1.084** | **1.265** | **1.256** | **R.GDQDATMSILDISMMTGFAPDTDDLK.Q** 16915 16917 16918 16919 |
|  | 16983 | **702.18** | **3505.89** | **3505.91** | **-0.02** | **0** | **22** | **0.39** | **1** | **---** | **---** | **---** | **---** | **---** | **---** | **R.TMQALPYSTVGNSNNYLHLSVLR.T** |
|  | 17064 | **902.72** | **3606.86** | **3606.86** | **-0.00** | **0** | **47** | **0.0011** | **1** | **---** | **---** | **---** | **---** | **---** | **---** | **R.YYGGGYGSTQATFMVFQALAQYQK.D** |
|  | 17121 | **920.25** | **3676.97** | **3676.92** | **0.05** | **0** | **(1)** | **39** | **1** | **---** | **---** | **---** | **---** | **---** | **---** | **K.YFKPGMPFDLMVFVTNPDGSPAYR.V** |
|  | 17230 | **924.22** | **3692.85** | **3692.91** | **-0.06** | **0** | **71** | **3.6e-006** | **1** | **---** | **---** | **---** | **---** | **---** | **---** | **K.YFKPGMPFDLMVFVTNPDGSPAYR.V** 17229 17232 17233 |
|  | 17237 | **739.59** | **3692.92** | **3692.91** | **0.01** | **0** | **(34)** | **0.018** | **1** | **---** | **---** | **---** | **---** | **---** | **---** | **K.YFKPGMPFDLMVFVTNPDGSPAYR.V** 17236 |
|  | 17432 | **775.79** | **3873.90** | **3873.96** | **-0.06** | **0** | **44** | **0.0013** | **1** | **1.054** | **0.891** | **0.693** | **1.045** | **1.174** | **0.746** | **R.LESEETMVLEAHDAQGDVPVTVTVHDFPGK.K** |
|  | 17624 | **1034.52** | **4134.04** | **4133.99** | **0.05** | **1** | **0** | **32** | **1** | **---** | **---** | **---** | **---** | **---** | **---** | **K.ADIGCTPGSGKDYAGVFSDAGLTFTSSSGQQTAQR.A** |
|  | 17643 | **830.26** | **4146.29** | **4146.27** | **0.01** | **2** | **17** | **0.7** | **1** | **---** | **---** | **---** | **---** | **---** | **---** | **R.SEFPESWLWNVEDLKEPPKNGISTK.L** 17637 17638 17644 |
|  | 18044 | **1170.40** | **5846.99** | **5847.10** | **-0.11** | **1** | **14** | **0.94** | **1** | **---** | **---** | **---** | **---** | **---** | **---** | **R.TVMVNIENPEGIPVKQDSLSSQNQLGVLPLSWDIPELVNMGQWK.I** |

  


---

|  |  |
| --- | --- |
| **2.** | P01023    **Mass:** 191703   **Score:** 11716  **Queries matched:** 654   **emPAI:** 2.64 |
|  | Alpha-2-macroglobulin OS=Homo sapiens GN=A2M PE=1 SV=1 |

|  |  |  |  |  |  |
| --- | --- | --- | --- | --- | --- |
|  | **Quantitation:** | **Ratio** | **Weighted** | **N** | **SD(geo)** |
|  |  | Patient1-Art/Control | 1.065 | 309 | 1.046 |
|  |  | Patient1-Porta/Control | 0.960 | 309 | NN |
|  |  | Patient1-Hepa/Control | 0.787 | 310 | NN |
|  |  | Patient2-Art/Control | 0.936 | 310 | NN |
|  |  | Patient2-Porta/Control | 1.151 | 310 | NN |
|  |  | Patient2-Hepa/Control | 0.879 | 310 | NN |

|  |  |  |  |  |  |  |  |  |  |  |  |  |  |  |  |  |
| --- | --- | --- | --- | --- | --- | --- | --- | --- | --- | --- | --- | --- | --- | --- | --- | --- |
|  | **Query** | **Observed** | **Mr(expt)** | **Mr(calc)** | **Delta** | **Miss** | **Score** | **Expect** | **Rank** | **Patient1-Art/Control** | **Patient1-Porta/Control** | **Patient1-Hepa/Control** | **Patient2-Art/Control** | **Patient2-Porta/Control** | **Patient2-Hepa/Control** | **Peptide** |
|  | 34 | **403.24** | **804.47** | **804.51** | **-0.05** | **0** | **11** | **3.7** | **1** | **---** | **---** | **---** | **---** | **---** | **---** | **K.GGIVR.T** 30 32 35 37 |
|  | 2363 | **476.30** | **950.59** | **950.62** | **-0.03** | **0** | **19** | **0.42** | **1** | **---** | **---** | **---** | **---** | **---** | **---** | **K.VIFIR.G** 2340 2341 2342 2343 2344 2345 2346 2348 2349 2350 2352 2353 2354 2355 2356 2357 2359 2362 2365 2366 2369 2370 2371 2372 2374 |
|  | 3019 | **499.25** | **996.49** | **996.57** | **-0.08** | **0** | **20** | **1.5** | **1** | **---** | **---** | **---** | **---** | **---** | **---** | **K.TFAQAR.A** 3020 3021 3022 3023 3026 |
|  | 3613 | **532.77** | **1063.52** | **1063.57** | **-0.05** | **0** | **30** | **0.03** | **1** | **1.196** | **0.858** | **0.895** | **0.812** | **0.979** | **0.878** | **K.VDSHFR.Q** 3612 |
|  | 4098 | **566.83** | **1131.64** | **1131.66** | **-0.01** | **0** | **40** | **0.0057** | **1** | **0.806** | **0.810** | **0.747** | **0.749** | **1.080** | **0.797** | **K.SDIAPVAR.L** 4088 4089 4090 4091 4092 4093 4094 4095 4096 4097 |
|  | 4159 | **570.32** | **1138.63** | **1138.72** | **-0.09** | **0** | **16** | **2.2** | **1** | **---** | **---** | **---** | **---** | **---** | **---** | **R.LVDGK.G** 4156 4157 4161 4162 |
|  | 4517 | **590.80** | **1179.59** | **1179.78** | **-0.19** | **0** | **18** | **0.96** | **1** | **---** | **---** | **---** | **---** | **---** | **---** | **K.VVVQK.K** 4516 4518 4519 4520 4521 4522 4523 4524 4525 4526 4529 4531 4534 4536 |
|  | 4613 | **595.81** | **1189.61** | **1189.64** | **-0.03** | **0** | **28** | **0.062** | **1** | **---** | **---** | **---** | **---** | **---** | **---** | **K.YGAATFTR.T** 4609 4614 4616 |
|  | 4658 | **601.31** | **1200.61** | **1200.77** | **-0.16** | **0** | **21** | **0.43** | **1** | **---** | **---** | **---** | **---** | **---** | **---** | **K.LSFVK.V** 4660 |
|  | 4892 | **621.82** | **1241.63** | **1241.80** | **-0.16** | **0** | **2** | **43** | **2** | **---** | **---** | **---** | **---** | **---** | **---** | **K.VFQLK.R** |
|  | 5190 | **638.32** | **1274.62** | **1274.74** | **-0.13** | **0** | **3** | **26** | **2** | **---** | **---** | **---** | **---** | **---** | **---** | **K.AFTNSK.I** |
|  | 5385 | **651.85** | **1301.69** | **1301.78** | **-0.10** | **0** | **14** | **4** | **1** | **---** | **---** | **---** | **---** | **---** | **---** | **R.TTVMVK.N** |
|  | 5444 | **655.82** | **1309.63** | **1309.67** | **-0.04** | **0** | **26** | **0.15** | **1** | **---** | **---** | **---** | **---** | **---** | **---** | **K.FQVDNNNR.L** 5443 5448 5449 |
|  | 5608 | **666.87** | **1331.72** | **1331.84** | **-0.12** | **0** | **29** | **0.075** | **1** | **---** | **---** | **---** | **---** | **---** | **---** | **K.GVPIPNK.V** 5605 5607 5610 |
|  | 6010 | **687.35** | **1372.69** | **1372.82** | **-0.13** | **0** | **30** | **0.089** | **1** | **---** | **---** | **---** | **---** | **---** | **---** | **R.GEAFTLK.A** 6011 6012 |
|  | 6295 | **707.85** | **1413.70** | **1413.81** | **-0.11** | **0** | **10** | **5.3** | **1** | **---** | **---** | **---** | **---** | **---** | **---** | **K.GPTQEFK.K** 6296 |
|  | 6567 | **726.91** | **1451.81** | **1451.82** | **-0.01** | **0** | **31** | **0.048** | **1** | **1.335** | **1.130** | **0.973** | **0.899** | **1.146** | **0.913** | **R.QGIPFFGQVR.L** 6555 6556 6558 6559 6561 6562 6563 6564 6565 6566 |
|  | 6901 | **749.35** | **1496.69** | **1496.87** | **-0.18** | **0** | **45** | **0.0012** | **1** | **1.055** | **1.023** | **0.724** | **1.035** | **1.142** | **0.802** | **K.SLNEEAVK.K** 6902 6905 6906 6907 |
|  | 7079 | **757.88** | **1513.75** | **1513.84** | **-0.09** | **0** | **51** | **0.00043** | **1** | **1.039** | **1.027** | **0.782** | **1.122** | **1.221** | **0.913** | **K.LPPNVVEESAR.A** 7074 7075 7076 7077 7078 7080 7081 7082 7083 7084 |
|  | 7230 | **511.96** | **1532.86** | **1532.95** | **-0.09** | **0** | **16** | **1.6** | **1** | **---** | **---** | **---** | **---** | **---** | **---** | **R.TGTHGLLVK.Q** |
|  | 7359 | **780.41** | **1558.81** | **1558.84** | **-0.03** | **0** | **48** | **0.0014** | **1** | **0.847** | **0.823** | **0.648** | **0.960** | **1.128** | **0.749** | **K.AIGYLNTGYQR.Q** 7349 7351 7357 7360 7361 |
|  | 7401 | **783.35** | **1564.69** | **1564.84** | **-0.15** | **0** | **53** | **0.00015** | **1** | **0.758** | **0.726** | **0.566** | **0.833** | **1.037** | **0.713** | **R.VTAAPQSVCALR.A** 7400 7402 7403 7407 7409 7410 7411 |
|  | 7474 | **790.38** | **1578.74** | **1578.77** | **-0.03** | **0** | **40** | **0.0038** | **1** | **1.228** | **1.037** | **0.923** | **0.777** | **1.026** | **0.988** | **R.VGFYESDVMGR.G** 7469 7470 7471 7472 7473 |
|  | 7784 | **813.96** | **1625.90** | **1626.00** | **-0.10** | **0** | **45** | **0.0021** | **1** | **1.479** | **1.156** | **0.970** | **0.970** | **1.245** | **0.904** | **K.ATVLNYLPK.C** 7780 7782 7785 7788 7789 |
|  | 8006 | **827.99** | **1653.97** | **1653.99** | **-0.03** | **0** | **41** | **0.0071** | **1** | **1.186** | **1.051** | **0.803** | **0.816** | **1.197** | **0.902** | **K.FEVQVTVPK.I** 8002 8003 8004 8005 8008 |
|  | 8494 | **571.33** | **1710.96** | **1711.01** | **-0.05** | **0** | **23** | **0.34** | **1** | **---** | **---** | **---** | **---** | **---** | **---** | **R.SSGSLLNNAIK.G** |
|  | 8571 | **575.67** | **1724.00** | **1724.01** | **-0.01** | **0** | **46** | **0.0015** | **1** | **1.024** | **0.856** | **0.635** | **1.073** | **1.076** | **0.613** | **R.QTVSWAVTPK.S** |
|  | 9186 | **599.35** | **1795.02** | **1795.17** | **-0.15** | **0** | **5** | **20** | **1** | **---** | **---** | **---** | **---** | **---** | **---** | **R.DLKPAIVK.V** 9187 |
|  | 9437 | **911.93** | **1821.84** | **1821.92** | **-0.08** | **0** | **49** | **0.00048** | **1** | **1.180** | **1.107** | **0.827** | **0.781** | **1.240** | **0.984** | **K.YDVENCLANK.V** 9436 9438 |
|  | 9756 | **617.31** | **1848.92** | **1849.00** | **-0.08** | **0** | **55** | **0.00015** | **1** | **1.099** | **0.812** | **0.716** | **0.385** | **1.344** | **0.807** | **R.LVHVEEPHTETVR.K** 9754 9755 9757 |
|  | 10181 | **645.98** | **1934.92** | **1935.02** | **-0.10** | **0** | **61** | **3.4e-005** | **1** | **2.062** | **1.521** | **1.256** | **1.118** | **1.296** | **0.929** | **R.NALFCLESAWK.T** 10182 10183 10184 10185 10186 10187 |
|  | 10501 | **1001.99** | **2001.97** | **2002.08** | **-0.12** | **0** | **78** | **7.7e-007** | **1** | **1.311** | **1.040** | **0.922** | **0.442** | **1.005** | **0.909** | **K.NEDSLVFVQTDK.S** 10502 10503 10508 10509 10511 |
|  | 10618 | **678.40** | **2032.19** | **2032.24** | **-0.06** | **0** | **2** | **42** | **1** | **---** | **---** | **---** | **---** | **---** | **---** | **K.SIYKPGQTVK.F** |
|  | 10972 | **697.01** | **2088.01** | **2088.04** | **-0.02** | **0** | **24** | **0.21** | **1** | **---** | **---** | **---** | **---** | **---** | **---** | **K.DMYSFLEDMGLK.A** 10968 10969 10973 |
|  | 11028 | **1050.02** | **2098.03** | **2097.98** | **0.05** | **1** | **9** | **6.5** | **1** | **---** | **---** | **---** | **---** | **---** | **---** | **K.HYDGSYSTFGERYGR.N** 11027 |
|  | 11037 | **1050.59** | **2099.16** | **2099.20** | **-0.04** | **0** | **70** | **6.8e-006** | **1** | **1.136** | **0.896** | **0.739** | **0.773** | **0.947** | **0.733** | **R.NQGNTWLTAFVLK.T** 11035 11038 11039 11040 |
|  | 11103 | **707.38** | **2119.13** | **2119.17** | **-0.04** | **0** | **54** | **0.00027** | **1** | **0.673** | **1.388** | **0.796** | **1.220** | **0.997** | **0.613** | **K.AAQVTIQSSGTFSSK.F** 11101 11102 11106 11107 11108 11109 11111 11112 11113 11114 11117 11120 11122 11126 11127 |
|  | 11215 | **709.69** | **2126.05** | **2126.13** | **-0.08** | **0** | **(34)** | **0.019** | **1** | **---** | **---** | **---** | **---** | **---** | **---** | **K.YDVENCLANK.V** 11211 11214 11216 11217 |
|  | 11350 | **718.05** | **2151.12** | **2151.15** | **-0.04** | **0** | **40** | **0.0063** | **1** | **0.601** | **0.484** | **0.327** | **0.727** | **0.464** | **0.855** | **K.VTGEGCVYLQTSLK.Y** 11340 11343 11344 11345 11351 11352 11357 11362 11363 11364 11365 11366 11367 11369 11374 11375 11377 11380 |
|  | 11588 | **1087.63** | **2173.25** | **2173.24** | **0.01** | **0** | **88** | **9.9e-008** | **1** | **1.173** | **0.921** | **0.767** | **0.952** | **1.136** | **0.847** | **K.ALLAYAFALAGNQDK.R** 11566 11567 11568 11569 11570 11571 11572 11573 11575 11576 11577 11578 11581 11583 11584 11585 11586 11587 11590 |
|  | 11965 | **738.37** | **2212.09** | **2212.25** | **-0.16** | **0** | **(73)** | **2.3e-006** | **1** | **1.278** | **1.100** | **0.811** | **0.906** | **1.104** | **0.750** | **R.IAQWQSFQLEGGLK.Q** 11966 11967 11968 11969 11970 11971 11972 11974 11975 11976 11978 11982 11983 11985 11986 11987 11989 11990 11991 11992 11993 11994 11995 11997 11999 12001 12002 12003 12004 12005 12007 12008 |
|  | 12335 | **761.06** | **2280.16** | **2280.26** | **-0.10** | **0** | **62** | **3.7e-005** | **1** | **1.278** | **1.181** | **0.874** | **0.466** | **1.204** | **0.875** | **R.TEHPFTVEEFVLPK.F** 12334 12336 |
|  | 12458 | **577.09** | **2304.33** | **2304.37** | **-0.04** | **1** | **3** | **31** | **1** | **---** | **---** | **---** | **---** | **---** | **---** | **K.KLSFYYLIMAK.G** |
|  | 12567 | **1161.62** | **2321.22** | **2321.24** | **-0.02** | **0** | **65** | **1.8e-005** | **1** | **1.048** | **0.911** | **0.792** | **0.606** | **1.080** | **0.990** | **K.SSSNEEVMFLTVQVK.G** 12561 12562 12563 12564 12566 12568 12569 12570 12572 12573 |
|  | 12590 | **583.34** | **2329.33** | **2329.34** | **-0.00** | **1** | **52** | **0.00045** | **1** | **0.715** | **0.668** | **0.513** | **0.846** | **0.966** | **0.699** | **K.ALLAYAFALAGNQDKR.K** 12588 12589 12591 12592 |
|  | 12620 | **782.43** | **2344.28** | **2344.43** | **-0.16** | **0** | **20** | **0.67** | **1** | **---** | **---** | **---** | **---** | **---** | **---** | **K.MVSGFIPLKPTVK.M** 12622 12623 |
|  | 12679 | **789.06** | **2364.17** | **2364.25** | **-0.08** | **0** | **90** | **4.6e-008** | **1** | **0.752** | **0.980** | **0.921** | **1.459** | **1.367** | **0.730** | **R.AFQPFFVELTMPYSVIR.G** 12678 12680 12681 12682 12683 12684 12685 12686 12687 12688 12689 12690 12691 12692 12693 12694 12695 12696 12697 12698 12699 12700 12701 12702 12703 12704 12705 12706 12707 12708 12709 12710 12711 12712 12713 12714 12715 12717 12718 |
|  | 12782 | **792.72** | **2375.14** | **2375.18** | **-0.03** | **0** | **30** | **0.037** | **1** | **###** | **###** | **###** | **###** | **###** | **###** | **K.AGAFCLSEDAGLGISSTASLR.A** 12779 12784 12785 12787 12788 12790 12791 12792 12797 12798 |
|  | 12945 | **805.41** | **2413.20** | **2413.28** | **-0.08** | **0** | **100** | **5.1e-009** | **1** | **0.491** | **0.455** | **0.368** | **0.945** | **0.856** | **0.710** | **K.LHTEAQIQEEGTVVELTGR.Q** 12944 12946 12947 12948 12950 12951 12954 12956 12957 12963 12966 12976 12980 12981 12982 12983 12984 12987 12989 12991 12995 |
|  | 13278 | **818.47** | **2452.39** | **2452.44** | **-0.05** | **0** | **96** | **1.9e-008** | **1** | **1.050** | **1.032** | **0.747** | **1.153** | **1.087** | **0.873** | **R.LLIYAVLPTGDVIGDSAK.Y** 13254 13255 13256 13257 13258 13259 13260 13261 13262 13263 13264 13266 13269 13271 13272 13273 13274 13275 13277 13280 13281 13282 13283 13286 13288 13289 13290 13291 13292 13293 13294 13295 13296 13298 13301 13302 13303 13304 13305 13306 13307 13308 13309 13310 13311 13312 13313 |
|  | 13338 | **819.76** | **2456.25** | **2456.28** | **-0.03** | **0** | **75** | **1.9e-006** | **1** | **1.153** | **1.115** | **0.749** | **0.698** | **1.070** | **0.696** | **K.QFSFPLSSEPFQGSYK.V** 13327 13328 13329 13331 13334 13339 13341 13344 13345 13346 |
|  | 13506 | **620.36** | **2477.43** | **2477.44** | **-0.01** | **0** | **(25)** | **0.18** | **1** | **---** | **---** | **---** | **---** | **---** | **---** | **K.ALLAYAFALAGNQDK.R** |
|  | 13589 | **831.50** | **2491.48** | **2491.45** | **0.03** | **0** | **57** | **0.00012** | **1** | **2.135** | **1.261** | **1.568** | **2.471** | **1.429** | **1.356** | **R.VSVQLEASPAFLAVPVEK.E** 13538 13539 13541 13542 13543 13544 13545 13549 13550 13556 13563 13564 13565 13566 13567 13568 13569 13571 13572 13573 13575 13576 13578 13582 13584 13585 13586 |
|  | 13950 | **862.04** | **2583.11** | **2583.15** | **-0.05** | **0** | **66** | **2.4e-006** | **1** | **0.728** | **0.522** | **0.641** | **0.805** | **0.908** | **1.009** | **K.DLTGFPGPLNDQDDEDCINR.H** 13953 |
|  | 14181 | **659.38** | **2633.48** | **2633.54** | **-0.06** | **1** | **(6)** | **16** | **1** | **---** | **---** | **---** | **---** | **---** | **---** | **K.ALLAYAFALAGNQDKR.K** |
|  | 14263 | **890.48** | **2668.42** | **2668.45** | **-0.03** | **0** | **(34)** | **0.027** | **1** | **---** | **---** | **---** | **---** | **---** | **---** | **R.AFQPFFVELTMPYSVIR.G** 14252 14259 14273 14277 14278 14280 |
|  | 14265 | **890.49** | **2668.44** | **2668.50** | **-0.05** | **0** | **72** | **3.9e-006** | **1** | **1.689** | **1.428** | **1.214** | **1.223** | **1.654** | **1.154** | **R.LLLQQVSLPELPGEYSMK.V** 14251 14253 14255 14256 14257 14258 14261 14262 14264 14269 14270 14271 14272 14274 14275 14279 14282 14283 14284 14285 14287 14290 |
|  | 14377 | **898.20** | **2691.57** | **2691.62** | **-0.05** | **0** | **33** | **0.027** | **1** | **1.616** | **1.295** | **1.079** | **1.332** | **1.437** | **1.097** | **K.DTVIKPLLVEPEGLEK.E** 14378 |
|  | 14391 | **676.55** | **2702.15** | **2702.29** | **-0.14** | **0** | **43** | **0.00041** | **1** | **---** | **---** | **---** | **---** | **---** | **---** | **K.MCPQLQQYEMHGPEGLR.V** 14392 |
|  | 14767 | **919.86** | **2756.56** | **2756.65** | **-0.08** | **0** | **(81)** | **4.5e-007** | **1** | **---** | **---** | **---** | **---** | **---** | **---** | **R.LLIYAVLPTGDVIGDSAK.Y** 14765 14766 14768 |
|  | 14776 | **921.15** | **2760.44** | **2760.49** | **-0.05** | **0** | **(41)** | **0.0052** | **1** | **---** | **---** | **---** | **---** | **---** | **---** | **K.QFSFPLSSEPFQGSYK.V** 14775 14777 |
|  | 15765 | **998.84** | **2993.50** | **2993.52** | **-0.01** | **0** | **93** | **2.5e-008** | **1** | **1.408** | **1.372** | **1.108** | **1.389** | **1.618** | **1.239** | **K.ETTFNSLLCPSGGEVSEELSLK.L** 15700 15701 15702 15703 15704 15705 15706 15707 15708 15709 15710 15712 15714 15716 15717 15718 15719 15720 15722 15723 15725 15726 15727 15729 15730 15731 15732 15733 15735 15736 15737 15739 15740 15741 15744 15745 15749 15750 15751 15752 15753 15754 15756 15757 15758 15759 15760 15761 15876 | **749.63** | **2994.51** | **2994.60** | **-0.09** | **0** | **56** | **0.00015** | **1** | **1.147** | **1.065** | **0.907** | **0.718** | **0.992** | **0.785** | **K.QQNAQGGFSSTQDTVVALHALSK.Y** 15872 15899 15900 |
|  | 16101 | **768.88** | **3071.48** | **3071.59** | **-0.11** | **0** | **88** | **5.6e-008** | **1** | **0.776** | **0.779** | **0.574** | **0.966** | **1.076** | **0.777** | **R.SLFTDLEAENDVLHCVAFAVPK.S** 16103 16105 16106 16108 16112 16113 16114 16116 16118 |
|  | 16365 | **1049.17** | **3144.49** | **3144.46** | **0.04** | **0** | **29** | **0.038** | **1** | **3.641** | **2.858** | **0.762** | **2.975** | **2.903** | **3.024** | **K.VYDYYETDEFAIAEYNAPCSK.D** 16364 |
|  | 16864 | **859.46** | **3433.82** | **3433.84** | **-0.02** | **0** | **40** | **0.0068** | **1** | **1.174** | **1.012** | **0.860** | **1.279** | **1.118** | **0.979** | **R.VVSMDENFHPLNELIPLVYIQDPK.G** 16862 16863 16865 |
|  | 17263 | **935.28** | **3737.07** | **3737.01** | **0.06** | **1** | **14** | **1.8** | **1** | **---** | **---** | **---** | **---** | **---** | **---** | **K.FRVVSMDENFHPLNELIPLVYIQDPK.G** 17261 17262 |
|  | 17267 | **748.62** | **3738.06** | **3738.05** | **0.01** | **0** | **(9)** | **5.9** | **1** | **---** | **---** | **---** | **---** | **---** | **---** | **R.VVSMDENFHPLNELIPLVYIQDPK.G** 17264 17265 |
|  | 17284 | **751.60** | **3752.95** | **3752.87** | **0.08** | **0** | **(9)** | **6.3** | **1** | **---** | **---** | **---** | **---** | **---** | **---** | **K.VYDYYETDEFAIAEYNAPCSK.D** |
|  | 17571 | **809.28** | **4041.35** | **4041.22** | **0.13** | **1** | **(4)** | **9.8** | **1** | **---** | **---** | **---** | **---** | **---** | **---** | **K.FRVVSMDENFHPLNELIPLVYIQDPK.G** 17570 |
|  | 17602 | **813.82** | **4064.04** | **4064.14** | **-0.10** | **1** | **24** | **0.19** | **1** | **---** | **---** | **---** | **---** | **---** | **---** | **K.YNILPEKEEFPFALGVQTLPQTCDEPK.A** 17605 17606 |
|  | 17853 | **963.89** | **4814.42** | **4814.49** | **-0.07** | **1** | **23** | **0.14** | **1** | **---** | **---** | **---** | **---** | **---** | **---** | **R.HNVYINGITYTPVSSTNEKDMYSFLEDMGLK.A** 17854 |
|  | 17855 | **963.93** | **4814.60** | **4814.49** | **0.12** | **1** | **(13)** | **1.6** | **1** | **---** | **---** | **---** | **---** | **---** | **---** | **R.HNVYINGITYTPVSSTNEKDMYSFLEDMGLK.A** |

  


---

|  |  |
| --- | --- |
| **3.** | P02671    **Mass:** 108897   **Score:** 7021   **Queries matched:** 387   **emPAI:** 2.44 |
|  | Fibrinogen alpha chain OS=Homo sapiens GN=FGA PE=1 SV=2 |

|  |  |  |  |  |  |
| --- | --- | --- | --- | --- | --- |
|  | **Quantitation:** | **Ratio** | **Weighted** | **N** | **SD(geo)** |
|  |  | Patient1-Art/Control | 0.940 | 118 | NN |
|  |  | Patient1-Porta/Control | 0.881 | 120 | NN |
|  |  | Patient1-Hepa/Control | 0.588 | 124 | NN |
|  |  | Patient2-Art/Control | 1.094 | 122 | NN |
|  |  | Patient2-Porta/Control | 1.164 | 123 | NN |
|  |  | Patient2-Hepa/Control | 0.757 | 118 | NN |

|  |  |  |  |  |  |  |  |  |  |  |  |  |  |  |  |  |
| --- | --- | --- | --- | --- | --- | --- | --- | --- | --- | --- | --- | --- | --- | --- | --- | --- |
|  | **Query** | **Observed** | **Mr(expt)** | **Mr(calc)** | **Delta** | **Miss** | **Score** | **Expect** | **Rank** | **Patient1-Art/Control** | **Patient1-Porta/Control** | **Patient1-Hepa/Control** | **Patient2-Art/Control** | **Patient2-Porta/Control** | **Patient2-Hepa/Control** | **Peptide** |
|  | 3193 | **502.79** | **1003.57** | **1003.60** | **-0.03** | **0** | **25** | **0.084** | **1** | **---** | **---** | **---** | **---** | **---** | **---** | **K.DLLPSR.D** 3169 3170 3171 3172 3173 3174 3175 3176 3177 3179 3181 3182 3183 3184 3185 3187 3188 3189 3190 3192 3194 3195 3196 3198 3199 3200 3202 3206 3207 3208 3209 |
|  | 3288 | **509.71** | **1017.40** | **1017.42** | **-0.02** | **0** | **1** | **15** | **1** | **---** | **---** | **---** | **---** | **---** | **---** | **K.CPSGCR.M** 3292 |
|  | 3374 | **511.77** | **1021.52** | **1021.57** | **-0.05** | **0** | **28** | **0.065** | **1** | **---** | **---** | **---** | **---** | **---** | **---** | **R.VSEDLR.S** 3360 3361 3362 3363 3364 3365 3366 3367 3368 3369 3370 3371 3372 3373 3376 3377 3380 3382 3383 3384 3386 3387 3388 3389 3390 3391 3392 3395 3397 3398 3400 |
|  | 3801 | **543.77** | **1085.53** | **1085.54** | **-0.01** | **0** | **7** | **12** | **1** | **---** | **---** | **---** | **---** | **---** | **---** | **R.DNTYNR.V** |
|  | 4314 | **578.35** | **1154.69** | **1154.75** | **-0.06** | **0** | **15** | **2.7** | **1** | **---** | **---** | **---** | **---** | **---** | **---** | **K.LVTSK.G** 4289 4290 4294 4296 4298 4299 4303 4304 4313 4322 4323 4325 4326 4329 |
|  | 4700 | **605.31** | **1208.61** | **1208.80** | **-0.18** | **0** | **22** | **0.38** | **1** | **---** | **---** | **---** | **---** | **---** | **---** | **R.IEVLK.R** 4701 4702 4703 4704 4705 4706 4707 4708 |
|  | 4719 | **606.29** | **1210.57** | **1210.75** | **-0.18** | **0** | **2** | **42** | **2** | **---** | **---** | **---** | **---** | **---** | **---** | **K.SQLQK.V** |
|  | 5172 | **636.30** | **1270.58** | **1270.62** | **-0.04** | **0** | **42** | **0.0023** | **1** | **0.847** | **0.925** | **0.549** | **1.149** | **1.097** | **0.772** | **R.GDFSSANNR.D** 5169 5171 |
|  | 5194 | **425.90** | **1274.68** | **1274.72** | **-0.05** | **1** | **8** | **8.6** | **1** | **---** | **---** | **---** | **---** | **---** | **---** | **K.DLLPSRDR.Q** 5193 5195 5197 |
|  | 5471 | **657.79** | **1313.56** | **1313.71** | **-0.15** | **0** | **32** | **0.014** | **1** | **1.009** | **1.101** | **0.728** | **0.776** | **1.138** | **0.653** | **K.VTSGSTTTTR.R** 5472 5473 5474 5475 5476 |
|  | 5862 | **682.39** | **1362.76** | **1362.81** | **-0.05** | **0** | **18** | **0.72** | **1** | **---** | **---** | **---** | **---** | **---** | **---** | **K.VPPEWK.A** 5842 5843 5845 5850 5853 5858 5859 5860 5861 5864 5866 5868 5869 5870 |
|  | 5894 | **455.92** | **1364.75** | **1364.90** | **-0.15** | **1** | **10** | **5.9** | **2** | **---** | **---** | **---** | **---** | **---** | **---** | **R.IEVLKR.K** 5890 5892 5895 5897 5898 5900 5904 5912 |
|  | 6067 | **691.86** | **1381.71** | **1381.70** | **0.01** | **0** | **(15)** | **2.3** | **1** | **---** | **---** | **---** | **---** | **---** | **---** | **K.ALTDMPQMR.M** 6062 6063 6064 6066 6068 |
|  | 6099 | **464.24** | **1389.69** | **1389.75** | **-0.06** | **0** | **(0)** | **43** | **2** | **---** | **---** | **---** | **---** | **---** | **---** | **R.DNTYNR.V** |
|  | 6170 | **699.79** | **1397.57** | **1397.69** | **-0.13** | **0** | **19** | **0.23** | **1** | **---** | **---** | **---** | **---** | **---** | **---** | **K.ALTDMPQMR.M** 6171 6173 |
|  | 6358 | **476.93** | **1427.77** | **1427.83** | **-0.06** | **0** | **39** | **0.0094** | **1** | **0.999** | **0.874** | **0.682** | **1.026** | **1.239** | **0.789** | **R.AQLVDMK.R** 6352 6353 6354 6355 6356 6359 6360 6361 6362 6364 6365 |
|  | 6611 | **486.27** | **1455.79** | **1455.94** | **-0.15** | **0** | **33** | **0.033** | **1** | **1.080** | **0.879** | **0.550** | **0.147** | **1.191** | **0.772** | **R.QHLPLIK.M** 6608 6609 6610 6612 6613 6614 6615 |
|  | 6751 | **739.91** | **1477.80** | **1477.79** | **0.01** | **0** | **39** | **0.0068** | **1** | **0.597** | **0.682** | **0.447** | **1.032** | **0.831** | **0.769** | **R.GDSTFESK.S** 6745 6746 6747 6748 6749 |
|  | 6874 | **747.86** | **1493.70** | **1493.74** | **-0.04** | **0** | **49** | **0.00052** | **1** | **0.592** | **0.606** | **0.510** | **0.681** | **0.868** | **0.601** | **K.QFTSSTSYNR.G** 6875 6876 6877 6879 |
|  | 7141 | **510.32** | **1527.93** | **1528.01** | **-0.08** | **1** | **13** | **3.4** | **1** | **---** | **---** | **---** | **---** | **---** | **---** | **R.KVIEK.V** 7134 7135 7136 7137 7139 7142 7145 |
|  | 7185 | **766.41** | **1530.81** | **1530.90** | **-0.09** | **0** | **47** | **0.0013** | **1** | **1.759** | **1.481** | **1.019** | **1.525** | **1.508** | **1.007** | **K.TVIGPDGHK.E** 7181 7182 7183 7201 |
|  | 7238 | **768.92** | **1535.82** | **1535.95** | **-0.13** | **0** | **43** | **0.0034** | **1** | **0.899** | **0.804** | **0.497** | **1.054** | **1.153** | **0.740** | **K.QLEQVIAK.D** 7239 7242 7243 7244 |
|  | 7884 | **818.93** | **1635.85** | **1635.91** | **-0.06** | **0** | **27** | **0.14** | **1** | **---** | **---** | **---** | **---** | **---** | **---** | **K.NSLFEYQK.N** 7878 7879 7880 7881 7882 7883 7885 7887 |
|  | 8428 | **570.34** | **1707.99** | **1708.03** | **-0.05** | **1** | **38** | **0.011** | **1** | **0.759** | **0.660** | **0.531** | **0.940** | **0.978** | **0.770** | **K.RLEVDIDIK.I** 8419 8420 8421 8422 8423 8424 8425 8427 8434 8437 8440 8442 8443 8445 8447 8450 8452 8456 8459 |
|  | 8530 | **572.30** | **1713.88** | **1714.07** | **-0.19** | **0** | **33** | **0.034** | **1** | **1.064** | **0.877** | **0.626** | **0.196** | **1.198** | **0.901** | **K.VQHIQLLQK.N** 8531 |
|  | 8548 | **430.49** | **1717.93** | **1717.98** | **-0.04** | **0** | **14** | **2.5** | **1** | **---** | **---** | **---** | **---** | **---** | **---** | **R.EYHTEK.L** 8544 8546 |
|  | 8588 | **432.77** | **1727.05** | **1727.07** | **-0.02** | **1** | **3** | **33** | **2** | **---** | **---** | **---** | **---** | **---** | **---** | **R.DRQHLPLIK.M** |
|  | 8788 | **874.97** | **1747.92** | **1747.96** | **-0.04** | **0** | **57** | **0.00014** | **1** | **0.785** | **0.786** | **0.534** | **1.026** | **1.129** | **0.742** | **R.GSESGIFTNTK.E** 8785 8786 8787 8789 8790 |
|  | 9428 | **607.92** | **1820.75** | **1820.94** | **-0.19** | **0** | **15** | **0.33** | **1** | **---** | **---** | **---** | **---** | **---** | **---** | **R.MELERPGGNEITR.G** 9429 9430 |
|  | 9487 | **608.97** | **1823.89** | **1823.93** | **-0.04** | **0** | **86** | **1.3e-007** | **1** | **1.039** | **0.851** | **0.993** | **1.058** | **1.367** | **0.612** | **K.GLIDEVNQDFTNR.I** 9449 9450 9451 9452 9453 9454 9455 9456 9457 9458 9459 9460 9461 9462 9463 9464 9465 9466 9467 9468 9469 9470 9471 9472 9473 9474 9475 9476 9477 9479 9480 9481 9482 9483 9484 9485 9486 9488 9489 9490 9491 9492 9493 9494 9495 9496 9497 9498 9499 9858 | **938.90** | **1875.78** | **1875.88** | **-0.10** | **0** | **97** | **2.7e-009** | **1** | **0.955** | **0.941** | **0.660** | **1.014** | **1.183** | **0.724** | **R.GGSTSYGTGSETESPR.N** 9859 9860 9862 |
|  | 10202 | **647.67** | **1939.99** | **1940.11** | **-0.13** | **0** | **(5)** | **19** | **1** | **---** | **---** | **---** | **---** | **---** | **---** | **K.NSLFEYQK.N** |
|  | 10221 | **650.65** | **1948.93** | **1949.02** | **-0.09** | **0** | **49** | **0.00063** | **1** | **1.365** | **1.103** | **0.783** | **0.878** | **1.139** | **0.781** | **K.DSHSLTTNIMEILR.G** 10219 10220 10222 |
|  | 11792 | **728.10** | **2181.29** | **2181.29** | **-0.00** | **1** | **2** | **41** | **1** | **---** | **---** | **---** | **---** | **---** | **---** | **K.LKNSLFEYQK.N** |
|  | 11891 | **734.66** | **2200.95** | **2201.12** | **-0.17** | **0** | **60** | **1.6e-005** | **1** | **1.354** | **1.157** | **0.759** | **1.159** | **1.250** | **0.822** | **R.HPDEAAFFDTASTGK.T** 11892 11893 |
|  | 12288 | **756.67** | **2267.00** | **2267.05** | **-0.05** | **0** | **126** | **4.8e-012** | **1** | **0.930** | **0.708** | **0.549** | **1.082** | **1.136** | **0.705** | **R.NPSSAGSWNSGSSGPGSTGNR.N** 12290 12291 12292 12293 |
|  | 12355 | **574.06** | **2292.23** | **2292.36** | **-0.13** | **1** | **31** | **0.057** | **1** | **---** | **---** | **---** | **---** | **---** | **---** | **K.TVIGPDGHKEVTK.E** |
|  | 12722 | **790.74** | **2369.21** | **2369.39** | **-0.18** | **0** | **42** | **0.0038** | **1** | **1.023** | **0.989** | **0.574** | **1.057** | **1.166** | **0.724** | **K.MKPVPDLVPGNFK.S** 12723 12724 12726 |
|  | 12881 | **802.10** | **2403.27** | **2403.27** | **0.01** | **1** | **10** | **7.2** | **1** | **---** | **---** | **---** | **---** | **---** | **---** | **R.MKGLIDEVNQDFTNR.I** |
|  | 13009 | **606.32** | **2421.24** | **2421.32** | **-0.08** | **1** | **9** | **6.8** | **1** | **---** | **---** | **---** | **---** | **---** | **---** | **R.EVDLKDYEDQQK.Q** 13011 |
|  | 13916 | **854.38** | **2560.11** | **2560.11** | **-0.00** | **0** | **70** | **1.5e-006** | **1** | **1.061** | **0.944** | **0.612** | **0.694** | **1.265** | **0.772** | **K.DSDWPFCSDEDWNYK.C** 13913 |
|  | 13960 | **862.40** | **2584.17** | **2584.25** | **-0.08** | **0** | **133** | **9.7e-013** | **1** | **1.138** | **0.750** | **0.760** | **1.322** | **1.267** | **0.983** | **K.TFPGFFSPMLGEFVSETESR.G** 13958 13959 13961 13964 13965 13966 13967 13971 13974 13975 13977 13979 13983 13984 13986 13988 13990 13992 13993 |
|  | 14014 | **649.34** | **2593.35** | **2593.41** | **-0.06** | **1** | **(53)** | **0.00031** | **1** | **0.489** | **0.532** | **0.367** | **0.660** | **1.066** | **0.635** | **K.NNKDSHSLTTNIMEILR.G** |
|  | 14128 | **653.34** | **2609.34** | **2609.41** | **-0.06** | **1** | **69** | **6.9e-006** | **1** | **0.780** | **0.770** | **0.490** | **0.798** | **1.083** | **0.696** | **K.NNKDSHSLTTNIMEILR.G** 14129 14130 14133 |
|  | 15135 | **717.09** | **2864.32** | **2864.32** | **0.00** | **0** | **(26)** | **0.067** | **1** | **---** | **---** | **---** | **---** | **---** | **---** | **K.DSDWPFCSDEDWNYK.C** 15136 15137 |
|  | 16828 | **1141.19** | **3420.55** | **3420.57** | **-0.01** | **0** | **(67)** | **3.2e-006** | **1** | **0.000** | **0.000** | **10.217** | **-362.311** | **14.130** | **0.254** | **K.EVVTSEDGSDCPEAMDLGTLSGIGTLDGFR.H** 16825 16827 16829 16830 16833 16835 |
|  | 16881 | **1146.53** | **3436.56** | **3436.56** | **-0.00** | **0** | **138** | **2.6e-013** | **1** | **0.000** | **-0.019** | **0.902** | **3.495** | **1.826** | **1.155** | **K.EVVTSEDGSDCPEAMDLGTLSGIGTLDGFR.H** 16867 16868 16869 16870 16871 16872 16873 16874 16875 16876 16877 16878 16879 16880 16882 16883 16884 16885 16886 16887 16888 16889 16890 16891 16892 16893 16895 |
|  | 17537 | **999.55** | **3994.17** | **3993.99** | **0.18** | **1** | **1** | **38** | **2** | **---** | **---** | **---** | **---** | **---** | **---** | **K.TFPGFFSPMLGEFVSETESRGSESGIFTNTK.E** |

  


---

|  |  |
| --- | --- |
| **4.** | P02652    **Mass:** 14606    **Score:** 5139   **Queries matched:** 181   **emPAI:** 33.76 |
|  | Apolipoprotein A-II OS=Homo sapiens GN=APOA2 PE=1 SV=1 |

|  |  |  |  |  |  |
| --- | --- | --- | --- | --- | --- |
|  | **Quantitation:** | **Ratio** | **Weighted** | **N** | **SD(geo)** |
|  |  | Patient1-Art/Control | 0.481 | 65 | NN |
|  |  | Patient1-Porta/Control | 0.494 | 68 | NN |
|  |  | Patient1-Hepa/Control | 0.310 | 68 | NN |
|  |  | Patient2-Art/Control | 1.283 | 71 | NN |
|  |  | Patient2-Porta/Control | 1.489 | 71 | NN |
|  |  | Patient2-Hepa/Control | 0.848 | 69 | NN |

|  |  |  |  |  |  |  |  |  |  |  |  |  |  |  |  |  |
| --- | --- | --- | --- | --- | --- | --- | --- | --- | --- | --- | --- | --- | --- | --- | --- | --- |
|  | **Query** | **Observed** | **Mr(expt)** | **Mr(calc)** | **Delta** | **Miss** | **Score** | **Expect** | **Rank** | **Patient1-Art/Control** | **Patient1-Porta/Control** | **Patient1-Hepa/Control** | **Patient2-Art/Control** | **Patient2-Porta/Control** | **Patient2-Hepa/Control** | **Peptide** |
|  | 5015 | **630.36** | **1258.70** | **1258.71** | **-0.01** | **0** | **15** | **1.7** | **1** | **---** | **---** | **---** | **---** | **---** | **---** | **K.DLMEK.V** 4998 4999 5000 5001 5002 5003 5004 5006 5007 5008 5009 5010 5011 5013 5014 |
|  | 5265 | **641.29** | **1280.56** | **1280.72** | **-0.16** | **0** | **11** | **2.6** | **1** | **---** | **---** | **---** | **---** | **---** | **---** | **K.SYFEK.S** |
|  | 7291 | **775.46** | **1548.91** | **1548.97** | **-0.06** | **0** | **22** | **0.37** | **1** | **---** | **---** | **---** | **---** | **---** | **---** | **K.EQLTPLIK.K** 7293 |
|  | 7486 | **527.63** | **1579.87** | **1579.90** | **-0.03** | **0** | **45** | **0.002** | **1** | **1.021** | **1.015** | **0.822** | **1.713** | **1.703** | **1.102** | **K.SPELQAEAK.S** 7478 7479 7480 7482 7483 |
|  | 10863 | **690.39** | **2068.16** | **2068.30** | **-0.14** | **1** | **28** | **0.12** | **1** | **---** | **---** | **---** | **---** | **---** | **---** | **K.SKEQLTPLIK.K** 10864 10865 10866 10867 |
|  | 11079 | **704.71** | **2111.11** | **2111.27** | **-0.16** | **1** | **35** | **0.022** | **1** | **0.368** | **0.396** | **0.231** | **1.264** | **1.416** | **0.795** | **K.VKSPELQAEAK.S** 11080 11081 11083 |
|  | 14347 | **1345.22** | **2688.43** | **2688.40** | **0.03** | **0** | **104** | **2.7e-009** | **1** | **---** | **---** | **---** | **---** | **---** | **---** | **K.AGTELVNFLSYFVELGTQPATQ.-** 14318 14319 14320 14321 14322 14323 14324 14325 14326 14327 14328 14329 14330 14331 14332 14333 14334 14335 14336 14337 14338 14339 14340 14342 14344 14345 14346 14348 14349 14350 14351 14353 14354 14355 14356 14357 |
|  | 15513 | **983.15** | **2946.43** | **2946.46** | **-0.03** | **0** | **87** | **8.9e-008** | **1** | **1.383** | **1.288** | **0.813** | **1.988** | **2.267** | **1.431** | **K.EPCVESLVSQYFQTVTDYGK.D** 15498 15499 15500 15501 15502 15503 15504 15505 15506 15508 15509 15510 15511 15512 15515 15516 15517 15519 15520 15521 15522 15523 15524 15525 15526 15527 15528 15529 15530 15532 |
|  | 15673 | **998.53** | **2992.57** | **2992.60** | **-0.03** | **0** | **(49)** | **0.00072** | **1** | **---** | **---** | **---** | **---** | **---** | **---** | **K.AGTELVNFLSYFVELGTQPATQ.-** 15667 15668 15669 15674 15680 15681 15682 15683 15684 15685 15686 15687 15688 15691 |
|  | 16282 | **1041.21** | **3120.62** | **3120.70** | **-0.08** | **1** | **108** | **9.7e-010** | **1** | **---** | **---** | **---** | **---** | **---** | **---** | **K.KAGTELVNFLSYFVELGTQPATQ.-** 16279 16280 16281 16283 16284 16285 16287 16288 16289 16292 16293 16294 16295 16298 16301 16302 16303 16304 16305 16306 16307 16308 16309 16311 16313 16316 16317 16324 |
|  | 16596 | **813.64** | **3250.55** | **3250.67** | **-0.12** | **0** | **(72)** | **2e-006** | **1** | **---** | **---** | **---** | **---** | **---** | **---** | **K.EPCVESLVSQYFQTVTDYGK.D** 16597 16601 16605 16606 16608 |
|  | 16604 | **813.68** | **3250.68** | **3250.67** | **0.01** | **0** | **(65)** | **1.6e-005** | **1** | **---** | **---** | **---** | **---** | **---** | **---** | **K.EPCVESLVSQYFQTVTDYGK.D** |
|  | 16854 | **857.21** | **3424.80** | **3424.90** | **-0.10** | **1** | **(11)** | **4.3** | **1** | **---** | **---** | **---** | **---** | **---** | **---** | **K.KAGTELVNFLSYFVELGTQPATQ.-** 16856 |
|  | 17464 | **971.75** | **3882.97** | **3882.95** | **0.02** | **1** | **82** | **3e-007** | **1** | **0.208** | **0.274** | **0.149** | **1.200** | **1.504** | **0.801** | **K.EPCVESLVSQYFQTVTDYGKDLMEK.V** 17447 17448 17449 17450 17451 17453 17454 17455 17456 17457 17460 17461 17462 17465 17466 17467 17468 17469 17470 17471 17472 17473 17474 17475 17476 |

  


---

|  |  |
| --- | --- |
| **5.** | P02647    **Mass:** 37756    **Score:** 4556   **Queries matched:** 312   **emPAI:** 21.92 |
|  | Apolipoprotein A-I OS=Homo sapiens GN=APOA1 PE=1 SV=1 |

|  |  |  |  |  |  |
| --- | --- | --- | --- | --- | --- |
|  | **Quantitation:** | **Ratio** | **Weighted** | **N** | **SD(geo)** |
|  |  | Patient1-Art/Control | 1.013 | 133 | NN |
|  |  | Patient1-Porta/Control | 0.938 | 133 | NN |
|  |  | Patient1-Hepa/Control | 0.626 | 133 | NN |
|  |  | Patient2-Art/Control | 1.137 | 133 | NN |
|  |  | Patient2-Porta/Control | 1.382 | 133 | NN |
|  |  | Patient2-Hepa/Control | 0.897 | 133 | NN |

|  |  |  |  |  |  |  |  |  |  |  |  |  |  |  |  |  |
| --- | --- | --- | --- | --- | --- | --- | --- | --- | --- | --- | --- | --- | --- | --- | --- | --- |
|  | **Query** | **Observed** | **Mr(expt)** | **Mr(calc)** | **Delta** | **Miss** | **Score** | **Expect** | **Rank** | **Patient1-Art/Control** | **Patient1-Porta/Control** | **Patient1-Hepa/Control** | **Patient2-Art/Control** | **Patient2-Porta/Control** | **Patient2-Hepa/Control** | **Peptide** |
|  | 1997 | **459.29** | **916.57** | **916.56** | **0.01** | **0** | **13** | **1.1** | **1** | **---** | **---** | **---** | **---** | **---** | **---** | **K.VEPLR.A** 1962 1964 1965 1966 1968 1975 1976 1977 1979 1981 1982 1986 1989 1993 1995 |
|  | 3236 | **504.77** | **1007.53** | **1007.56** | **-0.02** | **0** | **8** | **8.7** | **5** | **---** | **---** | **---** | **---** | **---** | **---** | **K.ETEGLR.Q** 3235 |
|  | 4474 | **589.29** | **1176.56** | **1176.64** | **-0.08** | **0** | **41** | **0.0042** | **1** | **1.164** | **1.159** | **0.864** | **1.499** | **1.553** | **1.116** | **R.AELQEGAR.Q** 4467 4468 4469 4470 4471 4472 |
|  | 4559 | **591.32** | **1180.62** | **1180.76** | **-0.15** | **0** | **18** | **1.1** | **1** | **---** | **---** | **---** | **---** | **---** | **---** | **R.LEALK.E** 4556 4557 4565 4566 4567 4568 4570 4572 4574 4575 4577 4578 4583 4584 4586 4587 4588 4589 |
|  | 4721 | **606.31** | **1210.60** | **1210.75** | **-0.15** | **1** | **3** | **31** | **1** | **---** | **---** | **---** | **---** | **---** | **---** | **K.KLNTQ.-** 4719 4720 |
|  | 4815 | **612.33** | **1222.64** | **1222.79** | **-0.15** | **0** | **21** | **0.48** | **1** | **---** | **---** | **---** | **---** | **---** | **---** | **K.QLNLK.L** 4814 4816 4817 4818 4819 4821 4822 4823 4824 4827 4828 |
|  | 5681 | **670.89** | **1339.77** | **1339.78** | **-0.01** | **0** | **25** | **0.19** | **1** | **---** | **---** | **---** | **---** | **---** | **---** | **K.DLEEVK.A** 5676 5677 5678 5679 5680 |
|  | 5775 | **676.34** | **1350.67** | **1350.71** | **-0.04** | **0** | **21** | **0.48** | **1** | **---** | **---** | **---** | **---** | **---** | **---** | **K.LSPLGEEMR.D** 5770 5772 5773 5776 |
|  | 6445 | **480.61** | **1438.79** | **1438.84** | **-0.05** | **0** | **(7)** | **13** | **1** | **---** | **---** | **---** | **---** | **---** | **---** | **R.LAEYHAK.A** 6444 |
|  | 6735 | **493.28** | **1476.81** | **1476.92** | **-0.12** | **1** | **4** | **20** | **1** | **---** | **---** | **---** | **---** | **---** | **---** | **R.QKVEPLR.A** |
|  | 6996 | **502.27** | **1503.80** | **1503.89** | **-0.09** | **0** | **28** | **0.11** | **1** | **---** | **---** | **---** | **---** | **---** | **---** | **K.LHELQEK.L** 6984 6985 6986 6987 6988 6989 6990 6991 6992 6993 6995 6998 7000 7001 7008 |
|  | 7585 | **802.38** | **1602.74** | **1602.77** | **-0.03** | **0** | **46** | **0.0011** | **1** | **1.053** | **0.944** | **0.643** | **1.283** | **1.257** | **0.693** | **K.WQEEMELYR.Q** 7576 7577 7578 7579 7580 7584 7587 7591 |
|  | 7596 | **535.92** | **1604.73** | **1604.85** | **-0.12** | **0** | **67** | **7.6e-006** | **1** | **1.230** | **0.911** | **0.701** | **0.770** | **1.989** | **1.110** | **R.THLAPYSDELR.Q** |
|  | 7700 | **810.92** | **1619.83** | **1619.98** | **-0.15** | **0** | **28** | **0.1** | **1** | **---** | **---** | **---** | **---** | **---** | **---** | **K.AKPALEDLR.Q** 7696 7697 7698 7699 7701 7703 7704 7707 |
|  | 7728 | **541.56** | **1621.65** | **1621.84** | **-0.19** | **1** | **19** | **0.15** | **1** | **---** | **---** | **---** | **---** | **---** | **---** | **K.LSPLGEEMRDR.A** 7727 7729 7730 7731 7732 7733 7735 7736 |
|  | 8735 | **872.50** | **1742.99** | **1743.04** | **-0.06** | **0** | **14** | **2.7** | **1** | **---** | **---** | **---** | **---** | **---** | **---** | **R.LAEYHAK.A** 8716 8717 8718 8719 8720 8721 8724 8727 8731 8737 8740 8742 8745 |
|  | 9035 | **591.33** | **1770.98** | **1770.99** | **-0.01** | **1** | **23** | **0.33** | **1** | **---** | **---** | **---** | **---** | **---** | **---** | **K.VEPLRAELQEGAR.Q** |
|  | 9621 | **613.67** | **1838.00** | **1838.11** | **-0.12** | **0** | **47** | **0.0014** | **1** | **1.604** | **1.632** | **1.073** | **1.671** | **1.547** | **1.732** | **R.QGLLPVLESFK.V** 9620 9622 9623 9624 9625 9626 9627 9628 9629 9630 9631 9632 9634 9635 9636 9637 9639 |
|  | 9701 | **922.52** | **1843.02** | **1843.09** | **-0.07** | **0** | **79** | **8.4e-007** | **1** | **1.055** | **1.002** | **0.681** | **1.375** | **1.578** | **1.053** | **K.DLATVYVDVLK.D** 9692 9693 9694 9695 9696 9697 9698 9699 9700 9702 9703 9704 9705 9706 9707 9709 9710 9711 9712 9713 9714 9715 9716 9717 9718 9719 9720 9721 |
|  | 9800 | **620.96** | **1859.86** | **1860.02** | **-0.17** | **0** | **62** | **2.2e-005** | **1** | **1.226** | **1.050** | **0.705** | **1.360** | **1.499** | **0.858** | **K.VQPYLDDFQK.K** 9799 9801 9802 9803 9804 |
|  | 10059 | **478.25** | **1908.96** | **1909.05** | **-0.09** | **0** | **(23)** | **0.29** | **1** | **---** | **---** | **---** | **---** | **---** | **---** | **R.THLAPYSDELR.Q** 10054 10056 10068 10070 10071 10074 |
|  | 10451 | **998.03** | **1994.04** | **1994.12** | **-0.08** | **0** | **85** | **1.8e-007** | **1** | **1.295** | **1.369** | **0.894** | **1.951** | **1.762** | **1.847** | **K.VSFLSALEEYTK.K** 10446 10447 10448 10449 10450 10452 10453 10455 10458 10461 |
|  | 10535 | **1005.01** | **2008.01** | **2008.07** | **-0.07** | **0** | **81** | **4.3e-007** | **1** | **1.725** | **1.528** | **1.010** | **1.397** | **1.648** | **1.114** | **R.DYVSQFEGSALGK.Q** 10533 10534 10536 10537 10538 |
|  | 10781 | **517.03** | **2064.10** | **2064.25** | **-0.14** | **1** | **30** | **0.06** | **1** | **---** | **---** | **---** | **---** | **---** | **---** | **R.QKLHELQEK.L** |
|  | 11314 | **537.83** | **2147.30** | **2147.30** | **-0.00** | **0** | **(24)** | **0.25** | **1** | **---** | **---** | **---** | **---** | **---** | **---** | **K.DLATVYVDVLK.D** 11312 |
|  | 11484 | **542.06** | **2164.20** | **2164.23** | **-0.03** | **0** | **(14)** | **2.9** | **1** | **---** | **---** | **---** | **---** | **---** | **---** | **K.VQPYLDDFQK.K** 11482 11483 11485 11486 |
|  | 12058 | **1111.09** | **2220.16** | **2220.19** | **-0.03** | **0** | **73** | **2.9e-006** | **1** | **1.069** | **0.927** | **0.599** | **0.944** | **1.385** | **0.795** | **K.LLDNWDSVTSTFSK.L** 12032 12033 12034 12035 12036 12037 12038 12039 12040 12041 12042 12043 12044 12045 12046 12047 12048 12049 12050 12051 12052 12053 12054 12055 12056 12057 12059 12060 12061 12062 12063 12064 12065 12066 12067 12068 12069 12070 12071 12072 12073 |
|  | 12432 | **575.59** | **2298.34** | **2298.32** | **0.02** | **0** | **(37)** | **0.013** | **1** | **---** | **---** | **---** | **---** | **---** | **---** | **K.VSFLSALEEYTK.K** 12426 12427 12428 12429 12430 12431 |
|  | 12509 | **579.06** | **2312.21** | **2312.28** | **-0.06** | **0** | **(36)** | **0.018** | **1** | **---** | **---** | **---** | **---** | **---** | **---** | **R.DYVSQFEGSALGK.Q** 12510 12511 |
|  | 12610 | **583.81** | **2331.23** | **2331.35** | **-0.12** | **2** | **19** | **0.7** | **1** | **---** | **---** | **---** | **---** | **---** | **---** | **R.QKVEPLRAELQEGAR.Q** 12611 |
|  | 12750 | **792.46** | **2374.35** | **2374.46** | **-0.11** | **1** | **63** | **3.3e-005** | **1** | **0.906** | **0.875** | **0.540** | **0.977** | **1.332** | **0.794** | **R.VKDLATVYVDVLK.D** 12746 12749 12751 12752 12756 12757 12760 12761 12763 12764 12766 12767 12768 12769 12770 12772 12773 12775 12776 12777 12778 |
|  | 13038 | **606.82** | **2423.26** | **2423.25** | **0.01** | **1** | **41** | **0.0051** | **1** | **0.375** | **0.384** | **0.259** | **1.055** | **1.199** | **0.609** | **K.DSGRDYVSQFEGSALGK.Q** 13029 13030 13032 13033 13036 13037 |
|  | 13863 | **847.76** | **2540.24** | **2540.34** | **-0.09** | **0** | **72** | **2.7e-006** | **1** | **1.471** | **1.012** | **0.788** | **0.794** | **0.865** | **0.865** | **R.EQLGPVTQEFWDNLEK.E** 13864 13866 13867 13868 13870 |
|  | 14977 | **703.39** | **2809.53** | **2809.52** | **0.01** | **1** | **56** | **0.00018** | **1** | **1.084** | **1.035** | **0.706** | **1.361** | **1.423** | **0.866** | **K.LREQLGPVTQEFWDNLEK.E** 14975 14978 |
|  | 16581 | **807.43** | **3225.67** | **3225.68** | **-0.00** | **1** | **75** | **1.5e-006** | **1** | **1.210** | **1.051** | **0.777** | **1.113** | **0.871** | **0.692** | **R.EQLGPVTQEFWDNLEKETEGLR.Q** 16576 |
|  | 16979 | **874.72** | **3494.86** | **3494.86** | **-0.01** | **2** | **45** | **0.0017** | **1** | **0.646** | **0.743** | **0.474** | **1.299** | **1.417** | **0.817** | **K.LREQLGPVTQEFWDNLEKETEGLR.Q** |

  


---

|  |  |
| --- | --- |
| **6.** | P04114    **Mass:** 625296   **Score:** 3747   **Queries matched:** 317   **emPAI:** 0.36 |
|  | Apolipoprotein B-100 OS=Homo sapiens GN=APOB PE=1 SV=1 |

|  |  |  |  |  |  |
| --- | --- | --- | --- | --- | --- |
|  | **Quantitation:** | **Ratio** | **Weighted** | **N** | **SD(geo)** |
|  |  | Patient1-Art/Control | 1.195 | 111 | NN |
|  |  | Patient1-Porta/Control | 1.124 | 111 | NN |
|  |  | **Patient1-Hepa/Control** | **0.783** | **110** | **1.066** |
|  |  | Patient2-Art/Control | 0.782 | 110 | NN |
|  |  | Patient2-Porta/Control | 0.873 | 110 | NN |
|  |  | Patient2-Hepa/Control | 0.611 | 110 | NN |

|  |  |  |  |  |  |  |  |  |  |  |  |  |  |  |  |  |
| --- | --- | --- | --- | --- | --- | --- | --- | --- | --- | --- | --- | --- | --- | --- | --- | --- |
|  | **Query** | **Observed** | **Mr(expt)** | **Mr(calc)** | **Delta** | **Miss** | **Score** | **Expect** | **Rank** | **Patient1-Art/Control** | **Patient1-Porta/Control** | **Patient1-Hepa/Control** | **Patient2-Art/Control** | **Patient2-Porta/Control** | **Patient2-Hepa/Control** | **Peptide** |
|  | 3186 | **502.78** | **1003.55** | **1003.56** | **-0.01** | **0** | **6** | **7.1** | **1** | **---** | **---** | **---** | **---** | **---** | **---** | **K.EVPEAR.A** |
|  | 3443 | **517.81** | **1033.61** | **1033.64** | **-0.03** | **0** | **16** | **1** | **1** | **---** | **---** | **---** | **---** | **---** | **---** | **K.LVTELR.G** 3441 3442 3445 |
|  | 3506 | **523.32** | **1044.63** | **1044.66** | **-0.03** | **0** | **21** | **0.19** | **1** | **---** | **---** | **---** | **---** | **---** | **---** | **K.GVISIPR.L** 3504 3505 3507 3509 |
|  | 3512 | **523.81** | **1045.61** | **1045.66** | **-0.05** | **0** | **34** | **0.017** | **1** | **1.271** | **1.209** | **0.851** | **0.837** | **0.790** | **0.558** | **K.AAIQALR.K** 3510 3511 3513 3514 3515 3516 |
|  | 3650 | **534.33** | **1066.64** | **1066.70** | **-0.05** | **0** | **14** | **7.5** | **1** | **---** | **---** | **---** | **---** | **---** | **---** | **R.AALGK.L** 3643 3645 3648 3652 |
|  | 3661 | **534.79** | **1067.57** | **1067.60** | **-0.03** | **0** | **15** | **2.5** | **1** | **---** | **---** | **---** | **---** | **---** | **---** | **K.MLETVR.T** 3655 3656 3663 3664 3668 |
|  | 3855 | **547.32** | **1092.62** | **1092.66** | **-0.04** | **0** | **13** | **2.7** | **1** | **---** | **---** | **---** | **---** | **---** | **---** | **K.LLLMGAR.T** 3854 3858 3860 3863 3865 |
|  | 4319 | **578.36** | **1154.70** | **1154.75** | **-0.05** | **0** | **13** | **3.9** | **1** | **---** | **---** | **---** | **---** | **---** | **---** | **K.SSILK.C** 4293 |
|  | 4334 | **578.76** | **1155.51** | **1155.53** | **-0.02** | **0** | **8** | **6** | **1** | **---** | **---** | **---** | **---** | **---** | **---** | **R.DLGQCDR.F** 4332 4335 |
|  | 4440 | **583.31** | **1164.61** | **1164.68** | **-0.07** | **0** | **19** | **0.5** | **1** | **---** | **---** | **---** | **---** | **---** | **---** | **R.ITLPDFR.L** |
|  | 4532 | **590.88** | **1179.74** | **1179.78** | **-0.04** | **0** | **3** | **46** | **9** | **---** | **---** | **---** | **---** | **---** | **---** | **R.VNLVK.T** |
|  | 4748 | **608.86** | **1215.70** | **1215.71** | **-0.01** | **0** | **2** | **33** | **1** | **---** | **---** | **---** | **---** | **---** | **---** | **K.VEDIPLAR.I** |
|  | 4847 | **615.36** | **1228.72** | **1228.80** | **-0.09** | **0** | **10** | **4.5** | **1** | **---** | **---** | **---** | **---** | **---** | **---** | **K.LTIFK.T** |
|  | 4874 | **619.91** | **1237.80** | **1237.82** | **-0.02** | **0** | **13** | **3.1** | **1** | **---** | **---** | **---** | **---** | **---** | **---** | **K.VIGTLK.N** |
|  | 5117 | **633.33** | **1264.65** | **1264.73** | **-0.08** | **0** | **9** | **8.7** | **1** | **---** | **---** | **---** | **---** | **---** | **---** | **K.LDVTTSIGR.R** 5121 |
|  | 5141 | **634.40** | **1266.78** | **1266.81** | **-0.03** | **0** | **18** | **1.4** | **1** | **---** | **---** | **---** | **---** | **---** | **---** | **K.AIQSLK.T** 5143 |
|  | 5208 | **639.30** | **1276.59** | **1276.69** | **-0.10** | **0** | **30** | **0.04** | **1** | **1.128** | **1.125** | **0.817** | **0.839** | **1.082** | **0.805** | **R.QIDDIDVR.F** 5213 5215 |
|  | 5415 | **435.26** | **1302.75** | **1302.82** | **-0.08** | **0** | **22** | **0.34** | **1** | **---** | **---** | **---** | **---** | **---** | **---** | **K.AHLNIK.S** 5406 5419 5421 5423 |
|  | 5451 | **655.89** | **1309.76** | **1309.77** | **-0.01** | **0** | **16** | **1.5** | **1** | **---** | **---** | **---** | **---** | **---** | **---** | **K.LEDTPK.I** 5443 5450 5452 |
|  | 5667 | **670.36** | **1338.70** | **1338.83** | **-0.13** | **0** | **5** | **22** | **1** | **---** | **---** | **---** | **---** | **---** | **---** | **K.TLQELK.K** |
|  | 5690 | **672.43** | **1342.85** | **1342.84** | **0.01** | **0** | **57** | **0.00037** | **1** | **0.787** | **0.543** | **0.542** | **0.718** | **0.759** | **0.569** | **K.LAPGELTIIL.-** 5683 5684 5685 5686 5687 5688 5689 |
|  | 5692 | **672.93** | **1343.84** | **1343.86** | **-0.02** | **0** | **22** | **0.33** | **1** | **---** | **---** | **---** | **---** | **---** | **---** | **K.LYSILK.I** 5691 5693 |
|  | 5931 | **684.42** | **1366.83** | **1366.86** | **-0.03** | **0** | **29** | **0.077** | **1** | **---** | **---** | **---** | **---** | **---** | **---** | **R.ALVDTLK.F** 5930 |
|  | 6265 | **705.45** | **1408.88** | **1408.89** | **-0.01** | **0** | **22** | **0.4** | **1** | **---** | **---** | **---** | **---** | **---** | **---** | **K.FIIPSPK.R** |
|  | 6319 | **709.37** | **1416.72** | **1416.78** | **-0.06** | **0** | **13** | **3.4** | **1** | **---** | **---** | **---** | **---** | **---** | **---** | **R.LAAYLMLMR.S** |
|  | 6330 | **474.61** | **1420.81** | **1420.87** | **-0.06** | **0** | **31** | **0.061** | **1** | **---** | **---** | **---** | **---** | **---** | **---** | **R.TPALHFK.S** 6329 6331 |
|  | 6370 | **715.41** | **1428.80** | **1428.80** | **0.01** | **0** | **19** | **1.1** | **1** | **---** | **---** | **---** | **---** | **---** | **---** | **K.LIDVISMYR.E** 6369 6371 |
|  | 6500 | **482.59** | **1444.76** | **1444.81** | **-0.05** | **0** | **51** | **0.00061** | **1** | **1.980** | **1.529** | **1.025** | **1.006** | **0.976** | **0.746** | **K.HINIDQFVR.K** 6499 6501 |
|  | 6635 | **487.58** | **1459.72** | **1459.81** | **-0.09** | **0** | **70** | **6.4e-006** | **1** | **1.144** | **1.069** | **0.622** | **0.940** | **0.930** | **0.591** | **K.SPAFTDLHLR.Y** 6636 6637 |
|  | 6668 | **490.92** | **1469.74** | **1469.78** | **-0.04** | **1** | **18** | **1** | **1** | **---** | **---** | **---** | **---** | **---** | **---** | **K.FRETLEDTR.D** |
|  | 7090 | **758.92** | **1515.83** | **1515.89** | **-0.07** | **0** | **29** | **0.083** | **1** | **---** | **---** | **---** | **---** | **---** | **---** | **K.SLWDFLK.L** |
|  | 7121 | **508.95** | **1523.84** | **1523.84** | **-0.00** | **0** | **26** | **0.16** | **1** | **---** | **---** | **---** | **---** | **---** | **---** | **K.HVAEAICK.E** 7122 |
|  | 7206 | **511.30** | **1530.87** | **1530.89** | **-0.02** | **0** | **7** | **13** | **3** | **---** | **---** | **---** | **---** | **---** | **---** | **K.QSFDLSVK.A** 7210 |
|  | 7214 | **766.84** | **1531.67** | **1531.72** | **-0.05** | **0** | **6** | **8.3** | **1** | **---** | **---** | **---** | **---** | **---** | **---** | **K.NSEEFAAAMSR.Y** |
|  | 7492 | **792.91** | **1583.81** | **1583.92** | **-0.11** | **0** | **30** | **0.054** | **1** | **1.321** | **1.222** | **0.813** | **0.843** | **0.982** | **0.698** | **K.TEVIPPLIENR.Q** 7494 7495 7496 7500 |
|  | 7708 | **810.99** | **1619.97** | **1620.04** | **-0.07** | **0** | **41** | **0.0047** | **1** | **1.119** | **1.002** | **0.845** | **0.704** | **0.914** | **0.665** | **R.TGISPLALIK.G** 7709 7710 |
|  | 7779 | **542.67** | **1624.97** | **1625.00** | **-0.02** | **0** | **12** | **4.2** | **1** | **---** | **---** | **---** | **---** | **---** | **---** | **K.LATALSLSNK.F** |
|  | 7814 | **543.99** | **1628.94** | **1628.93** | **0.00** | **0** | **21** | **0.59** | **1** | **---** | **---** | **---** | **---** | **---** | **---** | **R.NNALDFVTK.S** |
|  | 8009 | **828.44** | **1654.87** | **1654.98** | **-0.10** | **0** | **9** | **7.2** | **1** | **---** | **---** | **---** | **---** | **---** | **---** | **K.FPEVDVLTK.Y** |
|  | 8074 | **832.90** | **1663.79** | **1663.80** | **-0.01** | **0** | **7** | **9.6** | **1** | **---** | **---** | **---** | **---** | **---** | **---** | **R.SEYQADYESLR.F** |
|  | 8226 | **560.35** | **1678.02** | **1678.03** | **-0.00** | **0** | **52** | **0.0004** | **1** | **1.149** | **1.176** | **0.842** | **1.434** | **0.861** | **0.609** | **K.IEIPLPFGGK.S** 8223 8224 8225 8227 |
|  | 8638 | **434.23** | **1732.88** | **1733.02** | **-0.13** | **1** | **0** | **54** | **4** | **---** | **---** | **---** | **---** | **---** | **---** | **R.ARYHMK.A** |
|  | 9127 | **596.35** | **1786.02** | **1786.02** | **-0.00** | **0** | **(2)** | **41** | **3** | **---** | **---** | **---** | **---** | **---** | **---** | **K.VLVDHFGYTK.D** |
|  | 9850 | **938.01** | **1874.01** | **1874.06** | **-0.05** | **0** | **67** | **1.2e-005** | **1** | **0.961** | **0.801** | **0.646** | **0.655** | **0.712** | **0.581** | **R.TLQGIPQMIGEVIR.K** 9851 9852 9853 9854 |
|  | 9864 | **626.33** | **1875.98** | **1876.12** | **-0.15** | **1** | **15** | **2.1** | **1** | **---** | **---** | **---** | **---** | **---** | **---** | **R.DLKVEDIPLAR.I** 9863 9867 |
|  | 9874 | **627.34** | **1879.00** | **1879.09** | **-0.08** | **0** | **68** | **1.1e-005** | **1** | **1.308** | **1.257** | **0.886** | **1.260** | **0.771** | **0.768** | **K.SVSLPSLDPASAK.I** 9875 9876 |
|  | 9922 | **943.50** | **1884.99** | **1884.99** | **-0.00** | **0** | **23** | **0.33** | **1** | **---** | **---** | **---** | **---** | **---** | **---** | **K.AVSMPSFSILGSDVR.V** 9917 |
|  | 10032 | **634.02** | **1899.02** | **1899.11** | **-0.09** | **0** | **55** | **0.00022** | **1** | **1.219** | **1.117** | **0.814** | **0.860** | **0.928** | **0.642** | **K.LIVAMSSWLQK.A** 10033 |
|  | 10088 | **958.06** | **1914.10** | **1914.11** | **-0.01** | **0** | **31** | **0.054** | **1** | **1.063** | **1.218** | **0.728** | **1.118** | **0.874** | **0.575** | **R.EFQVPTFTIPK.L** 10083 10084 10085 10086 10087 |
|  | 10107 | **959.06** | **1916.10** | **1916.09** | **0.01** | **0** | **76** | **1.8e-006** | **1** | **1.170** | **1.119** | **0.793** | **0.741** | **0.923** | **0.620** | **K.GFEPTLEALFGK.Q** 10094 10096 10097 10098 10099 10100 10101 10102 10103 10104 10105 10106 10108 |
|  | 10456 | **665.70** | **1994.08** | **1994.19** | **-0.11** | **0** | **74** | **2.9e-006** | **1** | **1.521** | **1.267** | **0.837** | **0.771** | **0.867** | **0.561** | **K.IAELSATAQEIIK.S** 10457 10459 10460 10463 |
|  | 10528 | **670.04** | **2007.11** | **2007.21** | **-0.10** | **0** | **62** | **4.6e-005** | **1** | **2.326** | **1.657** | **1.349** | **0.942** | **1.139** | **0.584** | **R.TLADLTLLDSPIK.V** 10529 10530 10531 |
|  | 10647 | **1020.10** | **2038.19** | **2038.19** | **-0.00** | **0** | **69** | **8.1e-006** | **1** | **1.000** | **1.090** | **0.683** | **0.778** | **0.987** | **0.602** | **K.ALVEQGFTVPEIK.T** 10638 10639 10642 10644 10646 10648 10649 10651 |
|  | 10976 | **523.55** | **2090.17** | **2090.23** | **-0.06** | **0** | **16** | **1.7** | **1** | **---** | **---** | **---** | **---** | **---** | **---** | **K.VLVDHFGYTK.D** |
|  | 11245 | **1069.56** | **2137.10** | **2137.17** | **-0.07** | **0** | **108** | **1.1e-009** | **1** | **1.330** | **1.313** | **0.953** | **0.730** | **0.885** | **0.590** | **K.ATFQTPDFIVPLTDLR.I** 11246 11247 11248 11249 11250 11251 11253 11254 11255 11256 11257 11258 11259 11260 11261 |
|  | 11494 | **723.06** | **2166.15** | **2166.20** | **-0.05** | **0** | **58** | **0.0001** | **1** | **1.502** | **1.618** | **0.920** | **0.839** | **0.867** | **0.617** | **R.ITENDIQIALDDAK.I** 11492 11493 |
|  | 11733 | **1089.61** | **2177.20** | **2177.25** | **-0.05** | **0** | **87** | **1.2e-007** | **1** | **1.203** | **1.142** | **0.751** | **0.685** | **0.813** | **0.528** | **K.FSVPAGIVIPSFQALTAR.F** 11728 11730 11732 11735 11736 11738 11739 11742 11744 11746 11747 11749 11750 11751 11752 11753 11755 11756 11759 11760 11761 11762 11763 11765 |
|  | 12117 | **742.44** | **2224.29** | **2224.29** | **-0.00** | **0** | **42** | **0.0039** | **1** | **2.065** | **0.574** | **0.615** | **0.528** | **0.424** | **0.459** | **R.TSSFALNLPTLPEVK.F** 12115 12119 12120 |
|  | 12173 | **746.73** | **2237.16** | **2237.15** | **0.01** | **0** | **37** | **0.013** | **1** | **1.087** | **0.891** | **0.748** | **0.868** | **0.973** | **0.844** | **K.MTSNFPVDLSDYPK.S** 12172 |
|  | 12282 | **756.07** | **2265.17** | **2265.28** | **-0.10** | **0** | **67** | **1.2e-005** | **1** | **1.297** | **1.204** | **0.769** | **0.734** | **0.944** | **0.690** | **K.SVSDGIAALDLNAVANK.I** 12283 |
|  | 12307 | **759.08** | **2274.21** | **2274.33** | **-0.12** | **0** | **56** | **0.00018** | **1** | **1.453** | **1.490** | **0.923** | **0.777** | **0.911** | **0.479** | **R.GIISALLVPPETEEAK.Q** 12308 12309 12310 12312 12313 12314 12315 12316 12317 12318 12319 |
|  | 12514 | **772.06** | **2313.16** | **2313.27** | **-0.11** | **0** | **67** | **9.8e-006** | **1** | **3.616** | **2.343** | **1.562** | **1.273** | **1.438** | **0.980** | **R.NIQEYLSILTDPDGK.G** 12519 12522 12524 12527 12529 12531 |
|  | 12627 | **785.75** | **2354.21** | **2354.29** | **-0.08** | **0** | **12** | **3.6** | **1** | **---** | **---** | **---** | **---** | **---** | **---** | **K.VNWEEEAASGLLTSLK.D** |
|  | 12628 | **785.75** | **2354.22** | **2354.31** | **-0.09** | **0** | **66** | **1.7e-005** | **1** | **1.113** | **0.965** | **0.781** | **0.784** | **1.103** | **0.534** | **K.IEGNLIFDPNNYLPK.E** 12629 12630 12631 |
|  | 12634 | **786.10** | **2355.27** | **2355.34** | **-0.07** | **0** | **101** | **5.4e-009** | **1** | **3.620** | **2.433** | **1.377** | **1.699** | **1.368** | **0.734** | **K.VPLLLSEPINIIDALEMR.D** 12633 12635 12636 12638 12640 12641 12642 12643 12644 |
|  | 12650 | **787.06** | **2358.16** | **2358.18** | **-0.02** | **0** | **81** | **3.5e-007** | **1** | **2.025** | **1.477** | **0.898** | **0.781** | **0.805** | **0.584** | **K.LQDFSDQLSDYYEK.F** 12649 12651 |
|  | 13141 | **610.34** | **2437.31** | **2437.34** | **-0.03** | **0** | **21** | **0.58** | **1** | **---** | **---** | **---** | **---** | **---** | **---** | **K.AEPLAFTFSHDYK.G** 13139 |
|  | 13829 | **843.79** | **2528.34** | **2528.34** | **-0.01** | **0** | **50** | **0.00069** | **1** | **0.941** | **0.750** | **0.623** | **0.869** | **0.948** | **0.612** | **R.VIGNMGQTMEQLTPELK.S** 13819 13833 |
|  | 13861 | **846.45** | **2536.32** | **2536.31** | **0.02** | **0** | **49** | **0.00073** | **1** | **1.606** | **1.245** | **0.808** | **1.018** | **1.001** | **0.753** | **K.NLTDFAEQYSIQDWAK.R** 13860 13862 |
|  | 13881 | **849.83** | **2546.48** | **2546.51** | **-0.04** | **0** | **69** | **6.9e-006** | **1** | **0.743** | **0.825** | **0.667** | **0.802** | **0.911** | **0.645** | **R.VPSYTLILPSLELPVLHVPR.N** 13879 13880 13882 13883 13884 |
|  | 13946 | **857.80** | **2570.38** | **2570.46** | **-0.08** | **0** | **70** | **6.7e-006** | **1** | **1.653** | **1.350** | **1.076** | **0.792** | **0.830** | **0.611** | **K.TILGTMPAFEVSLQALQK.A** 13945 13947 |
|  | 14541 | **911.84** | **2732.50** | **2732.59** | **-0.09** | **0** | **30** | **0.061** | **1** | **---** | **---** | **---** | **---** | **---** | **---** | **R.DAVEKPQEFTIVAFVK.Y** |
|  | 14801 | **921.51** | **2761.51** | **2761.54** | **-0.03** | **0** | **0** | **59** | **1** | **---** | **---** | **---** | **---** | **---** | **---** | **K.TTLTAFGFASADLIEIGLEGK.G** |
|  | 15064 | **713.66** | **2850.61** | **2850.72** | **-0.11** | **0** | **(44)** | **0.0021** | **1** | **---** | **---** | **---** | **---** | **---** | **---** | **R.VPSYTLILPSLELPVLHVPR.N** 15065 |
|  | 15649 | **995.83** | **2984.47** | **2984.67** | **-0.20** | **0** | **5** | **14** | **1** | **---** | **---** | **---** | **---** | **---** | **---** | **K.ASGSLPYTQTLQDHLNSLK.E** 15648 |
|  | 16145 | **1025.60** | **3073.77** | **3073.78** | **-0.01** | **0** | **41** | **0.0037** | **1** | **1.320** | **0.574** | **-0.042** | **-0.002** | **-0.049** | **0.958** | **K.IADFELPTIIVPEQTIEIPSIK.F** 16133 16134 16136 16137 16139 16140 16141 16142 16143 16144 16147 16148 16149 16150 16151 16152 16153 16154 16155 16156 16157 16158 16160 16161 16162 |
|  | 16356 | **1046.55** | **3136.64** | **3136.63** | **0.01** | **0** | **10** | **5.7** | **2** | **---** | **---** | **---** | **---** | **---** | **---** | **K.NSLFFSAQPFEITASTNNEGNLK.V** |
|  | 16567 | **803.95** | **3211.77** | **3211.79** | **-0.02** | **1** | **17** | **1.3** | **1** | **---** | **---** | **---** | **---** | **---** | **---** | **K.VNWEEEAASGLLTSLKDNVPK.A** 16566 |
|  | 17581 | **1013.03** | **4048.11** | **4048.15** | **-0.05** | **0** | **18** | **0.7** | **1** | **---** | **---** | **---** | **---** | **---** | **---** | **K.YSQPEDSLIPFFEITVPESQLTVSQFTLPK.S** 17577 17582 17584 17586 17587 17592 17593 |

  


---

|  |  |
| --- | --- |
| **7.** | P01011    **Mass:** 55972    **Score:** 2916   **Queries matched:** 172   **emPAI:** 1.31 |
|  | Alpha-1-antichymotrypsin OS=Homo sapiens GN=SERPINA3 PE=1 SV=2 |

|  |  |  |  |  |  |
| --- | --- | --- | --- | --- | --- |
|  | **Quantitation:** | **Ratio** | **Weighted** | **N** | **SD(geo)** |
|  |  | **Patient1-Art/Control** | **1.349** | **76** | **1.102** |
|  |  | **Patient1-Porta/Control** | **1.066** | **76** | **1.107** |
|  |  | Patient1-Hepa/Control | 0.805 | 77 | NN |
|  |  | Patient2-Art/Control | 0.795 | 77 | NN |
|  |  | Patient2-Porta/Control | 0.863 | 77 | NN |
|  |  | Patient2-Hepa/Control | 0.545 | 77 | NN |

|  |  |  |  |  |  |  |  |  |  |  |  |  |  |  |  |  |
| --- | --- | --- | --- | --- | --- | --- | --- | --- | --- | --- | --- | --- | --- | --- | --- | --- |
|  | **Query** | **Observed** | **Mr(expt)** | **Mr(calc)** | **Delta** | **Miss** | **Score** | **Expect** | **Rank** | **Patient1-Art/Control** | **Patient1-Porta/Control** | **Patient1-Hepa/Control** | **Patient2-Art/Control** | **Patient2-Porta/Control** | **Patient2-Hepa/Control** | **Peptide** |
|  | 1915 | **457.22** | **912.43** | **912.53** | **-0.10** | **0** | **13** | **4.5** | **2** | **---** | **---** | **---** | **---** | **---** | **---** | **K.FSISR.D** 1916 1920 1930 1931 1932 1933 1936 1937 1942 1943 1947 1953 |
|  | 3689 | **535.76** | **1069.50** | **1069.57** | **-0.07** | **0** | **26** | **0.19** | **1** | **---** | **---** | **---** | **---** | **---** | **---** | **R.DSLEFR.E** 3687 3688 3690 |
|  | 4683 | **604.84** | **1207.66** | **1207.81** | **-0.15** | **0** | **15** | **1.9** | **2** | **---** | **---** | **---** | **---** | **---** | **---** | **K.QLVLK.A** 4694 4695 4696 |
|  | 5106 | **632.85** | **1263.68** | **1263.71** | **-0.03** | **0** | **48** | **0.00075** | **1** | **1.066** | **0.998** | **0.775** | **0.745** | **0.836** | **0.596** | **K.ADLSGITGAR.N** 5094 5096 5099 5100 5101 5104 5108 5109 5112 |
|  | 5123 | **633.36** | **1264.70** | **1264.76** | **-0.07** | **0** | **13** | **3** | **1** | **---** | **---** | **---** | **---** | **---** | **---** | **R.FYLSK.K** 5116 5117 5118 5119 5121 5122 5125 5127 |
|  | 5214 | **639.34** | **1276.66** | **1276.73** | **-0.07** | **0** | **51** | **0.00039** | **1** | **1.434** | **1.399** | **0.976** | **0.974** | **0.893** | **0.612** | **K.EQLSLLDR.F** 5209 5210 5211 5212 5216 5217 |
|  | 5447 | **655.84** | **1309.67** | **1309.84** | **-0.17** | **0** | **27** | **0.13** | **1** | **---** | **---** | **---** | **---** | **---** | **---** | **K.ITDLIK.D** 5452 |
|  | 5496 | **659.82** | **1317.62** | **1317.74** | **-0.12** | **0** | **4** | **21** | **1** | **---** | **---** | **---** | **---** | **---** | **---** | **R.FTEDAK.R** |
|  | 6280 | **471.59** | **1411.76** | **1411.75** | **0.01** | **1** | **24** | **0.3** | **1** | **---** | **---** | **---** | **---** | **---** | **---** | **R.WRDSLEFR.E** 6275 6279 |
|  | 6705 | **492.25** | **1473.72** | **1473.84** | **-0.12** | **1** | **7** | **9.8** | **1** | **---** | **---** | **---** | **---** | **---** | **---** | **R.FTEDAKR.L** |
|  | 7104 | **760.43** | **1518.84** | **1518.93** | **-0.09** | **0** | **70** | **5.5e-006** | **1** | **1.287** | **0.962** | **0.765** | **0.746** | **0.810** | **0.528** | **K.ITLLSALVETR.T** 7103 7105 7106 7107 7108 7109 7110 7111 7112 7113 |
|  | 8157 | **835.43** | **1668.84** | **1668.99** | **-0.15** | **0** | **33** | **0.029** | **1** | **1.172** | **1.129** | **0.687** | **0.854** | **0.953** | **0.534** | **R.EIGELYLPK.F** 8168 |
|  | 8383 | **568.29** | **1701.86** | **1702.04** | **-0.17** | **0** | **45** | **0.0019** | **1** | **1.416** | **1.031** | **0.752** | **0.671** | **0.792** | **0.540** | **R.NLAVSQVVHK.A** |
|  | 10043 | **635.68** | **1904.02** | **1904.19** | **-0.16** | **1** | **24** | **0.27** | **1** | **---** | **---** | **---** | **---** | **---** | **---** | **K.KLINDYVK.N** |
|  | 10584 | **673.68** | **2018.01** | **2018.05** | **-0.04** | **0** | **9** | **8** | **1** | **---** | **---** | **---** | **---** | **---** | **---** | **R.DEELSCTVVELK.Y** |
|  | 13617 | **834.10** | **2499.29** | **2499.27** | **0.01** | **0** | **61** | **4.1e-005** | **1** | **1.249** | **1.125** | **0.677** | **1.433** | **1.258** | **1.366** | **R.LYGSEAFATDFQDSAAAK.K** 13609 13610 13611 13612 13614 13615 13616 13619 13623 |
|  | 13663 | **839.44** | **2515.30** | **2515.36** | **-0.06** | **0** | **88** | **9.4e-008** | **1** | **1.646** | **0.541** | **0.854** | **0.572** | **0.833** | **0.736** | **K.AVLDVFEEGTEASAATAVK.I** 13658 13659 13660 13661 13662 13664 13665 13668 13669 13670 13671 13674 13675 13677 13678 13680 13682 13683 13686 13687 13688 13689 13690 13691 13692 13694 13695 13696 13697 13698 13700 13702 13703 13706 13707 13708 13709 13710 13712 13713 13714 13715 13717 13718 13720 13722 13723 13724 14401 | **902.14** | **2703.41** | **2703.41** | **-0.00** | **0** | **77** | **1.3e-006** | **1** | **1.853** | **1.649** | **0.918** | **1.058** | **0.879** | **0.700** | **K.DLDSQTMMVLVNYIFFK.A** 14393 14394 14395 14396 14397 14398 14399 14402 14403 14404 14406 |
|  | 15385 | **968.87** | **2903.58** | **2903.57** | **0.00** | **0** | **(25)** | **0.2** | **1** | **---** | **---** | **---** | **---** | **---** | **---** | **R.DYNLNDILLQLGIEEAFTSK.A** 15388 15390 15394 |
|  | 16542 | **802.95** | **3207.77** | **3207.78** | **-0.01** | **0** | **34** | **0.022** | **1** | **---** | **---** | **---** | **---** | **---** | **---** | **R.DYNLNDILLQLGIEEAFTSK.A** 16532 16533 16535 16536 16540 16541 16543 16544 16547 |
|  | 16667 | **825.70** | **3298.78** | **3298.77** | **0.01** | **0** | **45** | **0.0019** | **1** | **0.954** | **0.774** | **0.630** | **0.607** | **0.807** | **0.517** | **R.FNRPFLMIIVPTDTQNIFFMSK.V** 16656 16657 16665 16669 16670 16671 |

  


---

|  |  |
| --- | --- |
| **8.** | P00450    **Mass:** 143199   **Score:** 2113   **Queries matched:** 86   **emPAI:** 0.46 |
|  | Ceruloplasmin OS=Homo sapiens GN=CP PE=1 SV=1 |

|  |  |  |  |  |  |
| --- | --- | --- | --- | --- | --- |
|  | **Quantitation:** | **Ratio** | **Weighted** | **N** | **SD(geo)** |
|  |  | **Patient1-Art/Control** | **0.966** | **49** | **1.063** |
|  |  | Patient1-Porta/Control | 0.955 | 50 | NN |
|  |  | Patient1-Hepa/Control | 0.666 | 50 | NN |
|  |  | **Patient2-Art/Control** | **0.890** | **50** | **1.058** |
|  |  | Patient2-Porta/Control | 1.092 | 50 | NN |
|  |  | **Patient2-Hepa/Control** | **0.704** | **49** | **1.044** |

|  |  |  |  |  |  |  |  |  |  |  |  |  |  |  |  |  |
| --- | --- | --- | --- | --- | --- | --- | --- | --- | --- | --- | --- | --- | --- | --- | --- | --- |
|  | **Query** | **Observed** | **Mr(expt)** | **Mr(calc)** | **Delta** | **Miss** | **Score** | **Expect** | **Rank** | **Patient1-Art/Control** | **Patient1-Porta/Control** | **Patient1-Hepa/Control** | **Patient2-Art/Control** | **Patient2-Porta/Control** | **Patient2-Hepa/Control** | **Peptide** |
|  | 1719 | **452.26** | **902.51** | **902.55** | **-0.04** | **0** | **9** | **2.2** | **1** | **---** | **---** | **---** | **---** | **---** | **---** | **R.VPVER.K** 1712 |
|  | 2162 | **468.72** | **935.43** | **935.55** | **-0.12** | **0** | **15** | **1.3** | **1** | **---** | **---** | **---** | **---** | **---** | **---** | **K.VFNPR.R** 2163 |
|  | 4860 | **617.28** | **1232.55** | **1232.59** | **-0.04** | **0** | **12** | **2.8** | **1** | **---** | **---** | **---** | **---** | **---** | **---** | **K.YTVNQCR.R** 4859 |
|  | 5785 | **451.90** | **1352.68** | **1352.80** | **-0.12** | **0** | **14** | **3.7** | **2** | **---** | **---** | **---** | **---** | **---** | **---** | **R.VTFHNK.G** 5784 5787 |
|  | 7043 | **754.31** | **1506.61** | **1506.73** | **-0.12** | **0** | **45** | **0.0004** | **1** | **1.313** | **1.252** | **1.015** | **0.911** | **1.313** | **0.873** | **R.EYTDASFTNR.K** 7044 7045 7046 |
|  | 7641 | 805.93 | 1609.84 | 1609.79 | 0.04 | 0 | 2 | 37 | 3 | --- | --- | --- | --- | --- | --- | K.TYCSEPEK.V |
|  | 8202 | **418.51** | **1670.03** | **1670.06** | **-0.04** | **0** | **9** | **8.2** | **1** | **---** | **---** | **---** | **---** | **---** | **---** | **K.VYVHLK.N** |
|  | 8213 | **838.46** | **1674.91** | **1674.96** | **-0.06** | **0** | **65** | **1.9e-005** | **1** | **0.998** | **0.988** | **0.679** | **1.119** | **1.081** | **0.777** | **K.GAYPLSIEPIGVR.F** 8212 8214 8215 |
|  | 8655 | **868.41** | **1734.81** | **1734.84** | **-0.03** | **0** | **46** | **0.00097** | **1** | **0.631** | **0.620** | **0.728** | **0.638** | **1.169** | **0.709** | **R.QSEDSTFYLGER.T** |
|  | 9391 | **606.01** | **1815.00** | **1815.04** | **-0.04** | **0** | **45** | **0.0022** | **1** | **2.354** | **1.916** | **1.198** | **1.082** | **1.219** | **0.965** | **K.DIFTGLIGPMK.I** 9381 9386 9390 9393 9406 |
|  | 9444 | **912.44** | **1822.86** | **1822.94** | **-0.08** | **0** | **69** | **5.8e-006** | **1** | **1.320** | **1.198** | **0.900** | **1.092** | **1.139** | **0.793** | **K.ALYLQYTDETFR.T** 9443 9446 9447 |
|  | 9841 | **934.98** | **1867.95** | **1868.02** | **-0.07** | **0** | **90** | **5.8e-008** | **1** | **1.058** | **0.991** | **0.675** | **0.914** | **1.195** | **0.844** | **K.DLYSGLIGPLIVCR.R** 9842 9843 9844 9845 9846 9847 |
|  | 9943 | **473.00** | **1887.98** | **1888.05** | **-0.06** | **0** | **11** | **5.4** | **1** | **---** | **---** | **---** | **---** | **---** | **---** | **K.TYSDHPEK.V** |
|  | 10805 | **689.72** | **2066.15** | **2066.21** | **-0.06** | **0** | **77** | **1.2e-006** | **1** | **0.915** | **0.999** | **0.671** | **0.853** | **0.954** | **0.659** | **K.DIASGLIGPLIICK.K** 10798 10799 10800 10801 10802 10803 10804 10806 10807 10808 10809 10810 10811 10812 10813 10814 10815 10816 10817 10818 10819 10821 10822 |
|  | 10847 | **1034.52** | **2067.03** | **2067.10** | **-0.06** | **0** | **44** | **0.0022** | **1** | **0.898** | **0.912** | **0.579** | **0.929** | **1.101** | **0.618** | **K.EVGPTNADPVCLAK.M** 10846 10855 10856 10858 |
|  | 11218 | **710.02** | **2127.04** | **2127.15** | **-0.11** | **0** | **(11)** | **4.1** | **1** | **---** | **---** | **---** | **---** | **---** | **---** | **K.ALYLQYTDETFR.T** |
|  | 11556 | **725.05** | **2172.13** | **2172.23** | **-0.09** | **0** | **(17)** | **1.4** | **1** | **---** | **---** | **---** | **---** | **---** | **---** | **K.DLYSGLIGPLIVCR.R** |
|  | 12159 | **746.38** | **2236.11** | **2236.16** | **-0.05** | **0** | **8** | **7.6** | **1** | **---** | **---** | **---** | **---** | **---** | **---** | **K.AGLQAFFQVQECNK.S** |
|  | 15012 | **706.94** | **2823.72** | **2823.74** | **-0.02** | **0** | **49** | **0.00052** | **1** | **1.196** | **1.069** | **0.735** | **0.982** | **1.066** | **0.672** | **R.TTIEKPVWLGFLGPIIK.A** 15011 15013 15014 |
|  | 15650 | **997.13** | **2988.37** | **2988.45** | **-0.08** | **0** | **85** | **7.9e-008** | **1** | **0.880** | **1.012** | **0.902** | **0.944** | **0.999** | **0.587** | **R.GVYSSDVFDIFPGTYQTLEMFPR.T** 15652 15654 15656 15658 15663 |
|  | 16224 | **1034.81** | **3101.42** | **3101.49** | **-0.08** | **0** | **40** | **0.002** | **1** | **1.606** | **1.816** | **1.429** | **1.799** | **2.233** | **-0.125** | **R.SGAGTEDSACIPWAYYSTVDQVK.D** 16226 16228 |
|  | 16564 | **803.69** | **3210.72** | **3210.78** | **-0.06** | **1** | **15** | **1.7** | **1** | **---** | **---** | **---** | **---** | **---** | **---** | **K.KLISVDTEHSNIYLQNGPDR.I** |
|  | 16650 | **823.69** | **3290.72** | **3290.77** | **-0.05** | **1** | **22** | **0.41** | **1** | **---** | **---** | **---** | **---** | **---** | **---** | **K.MYYSAVDPTKDIFTGLIGPMK.I** 16649 |

  


---

|  |  |
| --- | --- |
| **9.** | P02675    **Mass:** 67700    **Score:** 1435   **Queries matched:** 185   **emPAI:** 2.42 |
|  | Fibrinogen beta chain OS=Homo sapiens GN=FGB PE=1 SV=2 |

|  |  |  |  |  |  |
| --- | --- | --- | --- | --- | --- |
|  | **Quantitation:** | **Ratio** | **Weighted** | **N** | **SD(geo)** |
|  |  | **Patient1-Art/Control** | **1.078** | **55** | **1.152** |
|  |  | Patient1-Porta/Control | 0.949 | 55 | NN |
|  |  | **Patient1-Hepa/Control** | **0.680** | **55** | **1.127** |
|  |  | Patient2-Art/Control | 0.959 | 55 | NN |
|  |  | Patient2-Porta/Control | 1.169 | 55 | NN |
|  |  | Patient2-Hepa/Control | 0.835 | 54 | NN |

|  |  |  |  |  |  |  |  |  |  |  |  |  |  |  |  |  |
| --- | --- | --- | --- | --- | --- | --- | --- | --- | --- | --- | --- | --- | --- | --- | --- | --- |
|  | **Query** | **Observed** | **Mr(expt)** | **Mr(calc)** | **Delta** | **Miss** | **Score** | **Expect** | **Rank** | **Patient1-Art/Control** | **Patient1-Porta/Control** | **Patient1-Hepa/Control** | **Patient2-Art/Control** | **Patient2-Porta/Control** | **Patient2-Hepa/Control** | **Peptide** |
|  | 3315 | **511.27** | **1020.52** | **1020.62** | **-0.10** | **0** | **25** | **0.15** | **2** | **---** | **---** | **---** | **---** | **---** | **---** | **K.ISQLTR.M** 3313 3314 3317 3318 3320 3321 3322 3323 3325 3332 3336 3337 3338 3339 3341 3342 3344 3345 3347 3348 3349 3350 3351 3352 |
|  | 4200 | **574.84** | **1147.67** | **1147.69** | **-0.01** | **0** | **33** | **0.024** | **1** | **0.639** | **0.629** | **0.519** | **1.030** | **1.011** | **0.877** | **R.SILENLR.S** 4187 4188 4189 4190 4191 4192 4193 4194 4196 4197 4199 4201 4204 |
|  | 4648 | **599.29** | **1196.57** | **1196.73** | **-0.16** | **0** | **21** | **0.56** | **1** | **---** | **---** | **---** | **---** | **---** | **---** | **K.AAATQK.K** 4649 4650 |
|  | 4878 | **621.24** | **1240.46** | **1240.61** | **-0.15** | **0** | **36** | **0.002** | **1** | **1.032** | **0.929** | **0.724** | **0.996** | **1.134** | **0.824** | **K.ECEEIIR.K** 4879 4880 4881 4882 4883 4884 4885 4886 4887 4888 |
|  | 5302 | **642.77** | **1283.53** | **1283.64** | **-0.11** | **0** | **27** | **0.042** | **1** | **3.347** | **0.708** | **0.752** | **0.740** | **0.902** | **0.696** | **R.QDGSVDFGR.K** 5303 |
|  | 5369 | **649.33** | **1296.65** | **1296.77** | **-0.12** | **0** | **12** | **5.4** | **1** | **---** | **---** | **---** | **---** | **---** | **---** | **K.DLWQK.R** |
|  | 5649 | **668.87** | **1335.73** | **1335.76** | **-0.03** | **0** | **33** | **0.042** | **1** | **0.673** | **0.606** | **0.754** | **0.883** | **0.986** | **0.682** | **K.IRPFFPQQ.-** 5641 5642 5643 5644 5645 5646 5647 5648 5650 |
|  | 6626 | **730.37** | **1458.73** | **1458.87** | **-0.13** | **0** | **30** | **0.05** | **1** | **1.499** | **1.317** | **0.910** | **1.246** | **1.393** | **1.078** | **K.YQISVNK.Y** 6623 6627 6628 6629 6630 6631 6632 |
|  | 7275 | **772.33** | **1542.64** | **1542.72** | **-0.07** | **0** | **4** | **6.8** | **1** | **---** | **---** | **---** | **---** | **---** | **---** | **K.EDGGGWWYNR.C** |
|  | 8791 | **583.65** | **1747.94** | **1748.04** | **-0.10** | **1** | **14** | **2.5** | **1** | **---** | **---** | **---** | **---** | **---** | **---** | **R.KWDPYK.Q** |
|  | 8928 | **882.50** | **1762.99** | **1763.07** | **-0.08** | **0** | **(20)** | **0.73** | **1** | **---** | **---** | **---** | **---** | **---** | **---** | **K.YQISVNK.Y** 8926 |
|  | 9746 | **616.63** | **1846.87** | **1846.92** | **-0.05** | **0** | **(2)** | **23** | **1** | **---** | **---** | **---** | **---** | **---** | **---** | **K.EDGGGWWYNR.C** |
|  | 10012 | **948.91** | **1895.81** | **1895.84** | **-0.02** | **0** | **43** | **0.001** | **1** | **1.115** | **1.023** | **0.698** | **0.973** | **1.238** | **1.284** | **K.LESDVSAQMEYCR.T** 10010 10011 |
|  | 10095 | **959.01** | **1916.01** | **1916.02** | **-0.01** | **0** | **39** | **0.0081** | **1** | **0.982** | **1.005** | **0.729** | **0.910** | **1.079** | **0.789** | **K.QGFGNVATNTDGK.N** 10090 10091 10092 10093 |
|  | 10716 | **514.02** | **2052.07** | **2052.24** | **-0.18** | **1** | **(1)** | **52** | **2** | **---** | **---** | **---** | **---** | **---** | **---** | **R.KWDPYK.Q** |
|  | 11878 | **551.02** | **2200.05** | **2200.04** | **0.01** | **0** | **(2)** | **29** | **1** | **---** | **---** | **---** | **---** | **---** | **---** | **K.LESDVSAQMEYCR.T** |
|  | 11908 | **1103.04** | **2204.06** | **2204.13** | **-0.07** | **0** | **53** | **0.00023** | **1** | **0.834** | **0.822** | **0.475** | **0.866** | **1.113** | **0.742** | **R.TPCTVSCNIPVVSGK.E** 11900 11901 11902 11903 11904 11905 11906 11907 11910 11911 11913 11914 11916 11917 11918 11919 11920 11921 11922 11923 |
|  | 12239 | **752.38** | **2254.11** | **2254.20** | **-0.09** | **0** | **9** | **5.6** | **1** | **---** | **---** | **---** | **---** | **---** | **---** | **R.EEAPSLRPAPPPISGGGYR.A** 12241 12244 |
|  | 12352 | **765.04** | **2292.09** | **2292.11** | **-0.02** | **0** | **61** | **3.2e-005** | **1** | **1.093** | **0.848** | **0.826** | **0.804** | **1.083** | **0.765** | **R.YYWGGQYTWDMAK.H** 12349 12350 12351 12353 12354 |
|  | 12540 | **772.74** | **2315.19** | **2315.20** | **-0.01** | **0** | **(40)** | **0.0063** | **1** | **2.265** | **1.756** | **0.899** | **1.201** | **1.314** | **0.765** | **R.MGPTELLIEMEDWK.G** 12541 |
|  | 12599 | **778.04** | **2331.09** | **2331.20** | **-0.10** | **0** | **50** | **0.00033** | **1** | **2.877** | **2.228** | **1.913** | **1.008** | **1.307** | **1.280** | **R.MGPTELLIEMEDWK.G** 12598 12600 12601 12602 12603 12604 12605 12606 12608 12609 |
|  | 12801 | **1189.07** | **2376.12** | **2376.19** | **-0.07** | **0** | **69** | **4.3e-006** | **1** | **1.897** | **1.660** | **1.057** | **1.172** | **1.316** | **0.990** | **K.DNENVVNEYSSELEK.H** 12803 12804 12805 12806 12807 |
|  | 12815 | **1192.08** | **2382.15** | **2382.16** | **-0.01** | **0** | **39** | **0.0054** | **1** | **1.151** | **0.988** | **0.675** | **0.301** | **1.200** | **0.777** | **K.NYCGLPGEYWLGNDK.I** 12814 12816 12817 |
|  | 12939 | **603.58** | **2410.31** | **2410.30** | **0.00** | **1** | **25** | **0.18** | **1** | **---** | **---** | **---** | **---** | **---** | **---** | **K.REEAPSLRPAPPPISGGGYR.A** |
|  | 13102 | **811.09** | **2430.26** | **2430.28** | **-0.02** | **0** | **97** | **1.1e-008** | **1** | **0.901** | **0.721** | **0.607** | **1.245** | **1.303** | **0.820** | **K.HQLYIDETVNSNIPTNLR.V** 13096 13097 13098 13099 13100 13101 13103 13104 |
|  | 13190 | **612.83** | **2447.28** | **2447.33** | **-0.05** | **0** | **20** | **0.56** | **1** | **---** | **---** | **---** | **---** | **---** | **---** | **K.AHYGGFTVQNEANK.Y** 13193 |
|  | 13943 | **857.40** | **2569.19** | **2569.28** | **-0.09** | **1** | **(12)** | **1.8** | **1** | **---** | **---** | **---** | **---** | **---** | **---** | **K.IQKLESDVSAQMEYCR.T** 13944 |
|  | 14032 | **866.41** | **2596.20** | **2596.32** | **-0.12** | **0** | **(51)** | **0.00023** | **1** | **---** | **---** | **---** | **---** | **---** | **---** | **R.YYWGGQYTWDMAK.H** 14033 14035 |
|  | 14312 | **672.59** | **2686.34** | **2686.37** | **-0.03** | **0** | **(24)** | **0.22** | **1** | **---** | **---** | **---** | **---** | **---** | **---** | **K.NYCGLPGEYWLGNDK.I** 14311 14314 14315 |
|  | 14313 | **672.59** | **2686.34** | **2686.37** | **-0.02** | **0** | **(11)** | **3.8** | **1** | **---** | **---** | **---** | **---** | **---** | **---** | **K.NYCGLPGEYWLGNDK.I** |
|  | 14545 | **684.61** | **2734.40** | **2734.49** | **-0.09** | **0** | **(73)** | **3e-006** | **1** | **---** | **---** | **---** | **---** | **---** | **---** | **K.HQLYIDETVNSNIPTNLR.V** 14544 14546 14547 14548 14550 14552 14553 14554 14555 |
|  | 15221 | **719.38** | **2873.48** | **2873.49** | **-0.00** | **1** | **20** | **0.58** | **1** | **---** | **---** | **---** | **---** | **---** | **---** | **K.IQKLESDVSAQMEYCR.T** |
|  | 15451 | **730.89** | **2919.55** | **2919.55** | **0.00** | **1** | **21** | **0.48** | **1** | **---** | **---** | **---** | **---** | **---** | **---** | **R.MGPTELLIEMEDWKGDK.V** 15450 |
|  | 15452 | **730.90** | **2919.57** | **2919.55** | **0.02** | **1** | **(17)** | **1.1** | **1** | **---** | **---** | **---** | **---** | **---** | **---** | **R.MGPTELLIEMEDWKGDK.V** |
|  | 16201 | **773.17** | **3088.65** | **3088.61** | **0.04** | **2** | **12** | **3.5** | **1** | **---** | **---** | **---** | **---** | **---** | **---** | **R.SKIQKLESDVSAQMEYCR.T** |
|  | 17329 | **948.73** | **3790.88** | **3790.88** | **-0.00** | **0** | **42** | **0.0029** | **1** | **0.737** | **0.751** | **0.413** | **1.249** | **1.038** | **0.859** | **R.NSVDELNNNVEAVSQTSSSSFQYMYLLK.D** |
|  | 17842 | **932.64** | **4658.15** | **4658.32** | **-0.17** | **1** | **65** | **4e-006** | **1** | **0.777** | **0.759** | **0.507** | **0.924** | **1.111** | **0.704** | **R.KAPDAGGCLHADPDLGVLCPTGCQLQEALLQQERPIR.N** 17844 17845 17847 17848 |

  


---

|  |  |
| --- | --- |
| **10.** | P02679    **Mass:** 62632    **Score:** 1317   **Queries matched:** 147   **emPAI:** 3.23 |
|  | Fibrinogen gamma chain OS=Homo sapiens GN=FGG PE=1 SV=3 |

|  |  |  |  |  |  |
| --- | --- | --- | --- | --- | --- |
|  | **Quantitation:** | **Ratio** | **Weighted** | **N** | **SD(geo)** |
|  |  | Patient1-Art/Control | 0.993 | 46 | NN |
|  |  | Patient1-Porta/Control | 0.870 | 46 | NN |
|  |  | Patient1-Hepa/Control | 0.591 | 46 | NN |
|  |  | Patient2-Art/Control | 0.945 | 46 | NN |
|  |  | Patient2-Porta/Control | 1.142 | 46 | NN |
|  |  | Patient2-Hepa/Control | 0.762 | 46 | NN |

|  |  |  |  |  |  |  |  |  |  |  |  |  |  |  |  |  |
| --- | --- | --- | --- | --- | --- | --- | --- | --- | --- | --- | --- | --- | --- | --- | --- | --- |
|  | **Query** | **Observed** | **Mr(expt)** | **Mr(calc)** | **Delta** | **Miss** | **Score** | **Expect** | **Rank** | **Patient1-Art/Control** | **Patient1-Porta/Control** | **Patient1-Hepa/Control** | **Patient2-Art/Control** | **Patient2-Porta/Control** | **Patient2-Hepa/Control** | **Peptide** |
|  | 3596 | **532.32** | **1062.62** | **1062.65** | **-0.03** | **0** | **15** | **1.3** | **4** | **---** | **---** | **---** | **---** | **---** | **---** | **K.IIPFNR.L** 3575 3576 3577 3578 3579 3580 3586 3590 3592 3594 3597 3606 3608 3611 |
|  | 4637 | **597.82** | **1193.63** | **1193.80** | **-0.17** | **0** | **16** | **1.6** | **1** | **---** | **---** | **---** | **---** | **---** | **---** | **K.IVNLK.E** 4638 4639 |
|  | 6622 | **730.34** | **1458.67** | **1458.84** | **-0.18** | **0** | **20** | **0.41** | **1** | **---** | **---** | **---** | **---** | **---** | **---** | **K.NWIQYK.E** 6624 6625 |
|  | 6716 | **738.73** | **1475.45** | **1475.62** | **-0.17** | **0** | **47** | **2e-005** | **1** | **1.038** | **0.917** | **0.623** | **0.572** | **1.155** | **0.770** | **R.DNCCILDER.F** 6717 6718 6719 |
|  | 6787 | **496.95** | **1487.82** | **1487.84** | **-0.03** | **0** | **24** | **0.32** | **1** | **---** | **---** | **---** | **---** | **---** | **---** | **R.LDGSVDFK.K** |
|  | 7225 | **767.38** | **1532.74** | **1532.84** | **-0.10** | **0** | **4** | **18** | **1** | **---** | **---** | **---** | **---** | **---** | **---** | **K.MLEEIMK.Y** |
|  | 7363 | **780.83** | **1559.65** | **1559.79** | **-0.14** | **0** | **35** | **0.0058** | **1** | **1.114** | **1.086** | **0.626** | **0.991** | **1.221** | **0.879** | **K.DCQDIANK.G** 7362 7364 7368 |
|  | 7911 | **821.93** | **1641.85** | **1641.93** | **-0.08** | **1** | **20** | **0.54** | **1** | **---** | **---** | **---** | **---** | **---** | **---** | **K.VGPEADKYR.L** 7908 7909 7913 |
|  | 7936 | **548.95** | **1643.84** | **1643.95** | **-0.11** | **1** | **24** | **0.31** | **1** | **---** | **---** | **---** | **---** | **---** | **---** | **K.RLDGSVDFK.K** 7935 7937 7938 7940 7941 |
|  | 8709 | **871.93** | **1741.84** | **1741.92** | **-0.08** | **0** | **(28)** | **0.09** | **1** | **---** | **---** | **---** | **---** | **---** | **---** | **R.TSTADYAMFK.V** 8711 8712 |
|  | 8869 | **879.93** | **1757.85** | **1757.91** | **-0.06** | **0** | **51** | **0.0004** | **1** | **0.636** | **0.629** | **0.600** | **0.857** | **0.911** | **0.683** | **R.TSTADYAMFK.V** 8864 8865 8866 8867 8868 |
|  | 9608 | **612.31** | **1833.91** | **1834.04** | **-0.13** | **0** | **12** | **3.6** | **1** | **---** | **---** | **---** | **---** | **---** | **---** | **K.DTVQIHDITGK.D** |
|  | 9998 | **631.38** | **1891.13** | **1891.14** | **-0.02** | **1** | **28** | **0.11** | **1** | **---** | **---** | **---** | **---** | **---** | **---** | **K.KNWIQYK.E** 9997 |
|  | 10112 | **641.02** | **1920.03** | **1920.14** | **-0.12** | **1** | **15** | **2.3** | **1** | **---** | **---** | **---** | **---** | **---** | **---** | **R.LDGSVDFKK.N** |
|  | 10223 | **650.71** | **1949.10** | **1949.15** | **-0.05** | **1** | **(5)** | **21** | **1** | **---** | **---** | **---** | **---** | **---** | **---** | **R.KMLEEIMK.Y** |
|  | 10303 | **492.28** | **1965.10** | **1965.14** | **-0.04** | **1** | **15** | **2** | **1** | **---** | **---** | **---** | **---** | **---** | **---** | **R.KMLEEIMK.Y** 10301 10302 |
|  | 10422 | **663.05** | **1986.12** | **1986.16** | **-0.04** | **0** | **85** | **2.4e-007** | **1** | **0.810** | **0.690** | **0.518** | **0.567** | **0.744** | **0.523** | **K.IHLISTQSAIPYALR.V** 10421 10423 10424 |
|  | 10769 | **688.36** | **2062.05** | **2062.12** | **-0.07** | **0** | **(8)** | **11** | **1** | **---** | **---** | **---** | **---** | **---** | **---** | **R.TSTADYAMFK.V** 10766 |
|  | 10920 | **520.06** | **2076.20** | **2076.25** | **-0.05** | **2** | **18** | **1.1** | **1** | **---** | **---** | **---** | **---** | **---** | **---** | **K.RLDGSVDFKK.N** |
|  | 11187 | **708.05** | **2121.11** | **2121.13** | **-0.02** | **0** | **48** | **0.00091** | **1** | **0.645** | **0.578** | **0.401** | **0.912** | **1.047** | **0.708** | **R.YLQEIYNSNNQK.I** 11180 11181 11182 11183 11184 11185 11186 11188 11189 11190 |
|  | 11299 | **1074.01** | **2146.00** | **2146.05** | **-0.05** | **0** | **66** | **8.6e-006** | **1** | **2.158** | **1.548** | **1.309** | **1.195** | **1.504** | **1.101** | **K.VAQLEAQCQEPCK.D** 11298 11301 11303 11304 11305 11306 11307 |
|  | 11432 | **539.29** | **2153.13** | **2153.22** | **-0.08** | **0** | **36** | **0.016** | **1** | **1.018** | **0.899** | **0.570** | **1.142** | **1.184** | **0.788** | **R.LTIGEGQQHHLGGAK.Q** 11425 11426 11427 11428 11429 11430 11431 11433 11434 11435 11437 |
|  | 11938 | **552.35** | **2205.36** | **2205.37** | **-0.01** | **0** | **24** | **0.2** | **1** | **---** | **---** | **---** | **---** | **---** | **---** | **K.QSGLYFIKPLK.A** 11936 11937 |
|  | 12345 | **573.60** | **2290.35** | **2290.36** | **-0.01** | **0** | **(31)** | **0.049** | **1** | **---** | **---** | **---** | **---** | **---** | **---** | **K.IHLISTQSAIPYALR.V** 12346 |
|  | 13090 | **607.33** | **2425.31** | **2425.34** | **-0.03** | **0** | **(6)** | **17** | **1** | **---** | **---** | **---** | **---** | **---** | **---** | **R.YLQEIYNSNNQK.I** |
|  | 15609 | **744.43** | **2973.69** | **2973.58** | **0.11** | **1** | **2** | **39** | **2** | **---** | **---** | **---** | **---** | **---** | **---** | **K.MLEEIMKYEASILTHDSSIR.Y** 15614 |
|  | 15938 | **1001.81** | **3002.42** | **3002.41** | **0.00** | **0** | **65** | **1.1e-005** | **1** | **1.165** | **0.911** | **0.929** | **1.217** | **2.266** | **1.415** | **R.FGSYCPTTCGIADFLSTYQTK.V** 15920 15921 15922 15923 15924 15925 15926 15927 15928 15929 15930 15931 15932 15933 15934 15935 15936 15937 15939 15940 15941 15942 15943 15944 15945 15946 15947 15948 15949 15950 15951 15952 |
|  | 16686 | **827.67** | **3306.64** | **3306.62** | **0.02** | **0** | **(58)** | **6.5e-005** | **1** | **---** | **---** | **---** | **---** | **---** | **---** | **R.FGSYCPTTCGIADFLSTYQTK.V** 16684 |
|  | 16909 | **1148.22** | **3441.63** | **3441.58** | **0.05** | **0** | **17** | **0.47** | **1** | **---** | **---** | **---** | **---** | **---** | **---** | **R.LTYAYFAGGDAGDAFDGFDFGDDPSDK.F** |
|  | 16928 | **862.94** | **3447.73** | **3447.87** | **-0.14** | **0** | **44** | **0.0017** | **1** | **0.921** | **0.901** | **0.636** | **1.015** | **1.199** | **0.770** | **K.AIQLTYNPDESSKPNMIDAATLK.S** |
|  | 17101 | **915.47** | **3657.84** | **3657.88** | **-0.03** | **1** | **63** | **2e-005** | **1** | **0.804** | **0.731** | **0.489** | **0.848** | **1.228** | **0.794** | **K.VAQLEAQCQEPCKDTVQIHDITGK.D** 17099 17102 17105 17106 |
|  | 17283 | **751.43** | **3752.11** | **3752.07** | **0.04** | **0** | **(11)** | **3.9** | **1** | **---** | **---** | **---** | **---** | **---** | **---** | **K.AIQLTYNPDESSKPNMIDAATLK.S** |

  


---

|  |  |
| --- | --- |
| **11.** | P02774    **Mass:** 67906    **Score:** 1153   **Queries matched:** 79   **emPAI:** 0.45 |
|  | Vitamin D-binding protein OS=Homo sapiens GN=GC PE=1 SV=1 |

|  |  |  |  |  |  |
| --- | --- | --- | --- | --- | --- |
|  | **Quantitation:** | **Ratio** | **Weighted** | **N** | **SD(geo)** |
|  |  | Patient1-Art/Control | 0.937 | 29 | NN |
|  |  | Patient1-Porta/Control | 0.876 | 29 | NN |
|  |  | Patient1-Hepa/Control | 0.559 | 29 | NN |
|  |  | Patient2-Art/Control | 1.145 | 29 | NN |
|  |  | **Patient2-Porta/Control** | **1.333** | **29** | **1.077** |
|  |  | Patient2-Hepa/Control | 0.778 | 29 | NN |

|  |  |  |  |  |  |  |  |  |  |  |  |  |  |  |  |  |
| --- | --- | --- | --- | --- | --- | --- | --- | --- | --- | --- | --- | --- | --- | --- | --- | --- |
|  | **Query** | **Observed** | **Mr(expt)** | **Mr(calc)** | **Delta** | **Miss** | **Score** | **Expect** | **Rank** | **Patient1-Art/Control** | **Patient1-Porta/Control** | **Patient1-Hepa/Control** | **Patient2-Art/Control** | **Patient2-Porta/Control** | **Patient2-Hepa/Control** | **Peptide** |
|  | 4103 | **568.31** | **1134.61** | **1134.76** | **-0.15** | **0** | **25** | **0.14** | **1** | **---** | **---** | **---** | **---** | **---** | **---** | **K.GPLLK.K** 4100 4101 4102 4105 4106 4107 4108 4109 4110 4111 4112 4113 4114 4116 4117 4118 4119 4120 4121 4122 4123 4124 4126 4127 4128 4130 4132 4133 |
|  | 4782 | **610.36** | **1218.70** | **1218.66** | **0.05** | **0** | **24** | **0.2** | **1** | **---** | **---** | **---** | **---** | **---** | **---** | **K.YTFELSR.R** 4764 4765 4767 4769 4772 |
|  | 5359 | **648.38** | **1294.75** | **1294.84** | **-0.09** | **0** | **9** | **8.8** | **1** | **---** | **---** | **---** | **---** | **---** | **---** | **R.LSNLIK.L** |
|  | 6233 | **704.45** | **1406.88** | **1406.90** | **-0.02** | **0** | **23** | **0.32** | **1** | **---** | **---** | **---** | **---** | **---** | **---** | **K.VLEPTLK.S** |
|  | 7575 | **801.85** | **1601.69** | **1601.80** | **-0.11** | **0** | **7** | **4.4** | **1** | **---** | **---** | **---** | **---** | **---** | **---** | **K.DVCDPGNTK.V** |
|  | 9097 | **593.65** | **1777.94** | **1778.06** | **-0.12** | **0** | **56** | **0.00017** | **1** | **1.215** | **0.915** | **0.668** | **0.344** | **1.284** | **0.918** | **R.THLPEVFLSK.V** 9098 |
|  | 9612 | **612.70** | **1835.08** | **1835.10** | **-0.01** | **1** | **19** | **0.78** | **1** | **---** | **---** | **---** | **---** | **---** | **---** | **R.KLCMAALK.H** |
|  | 12545 | **580.06** | **2316.22** | **2316.29** | **-0.07** | **1** | **0** | **62** | **1** | **---** | **---** | **---** | **---** | **---** | **---** | **K.VMDKYTFELSR.R** |
|  | 14123 | **869.84** | **2606.51** | **2606.52** | **-0.01** | **1** | **67** | **1.3e-005** | **1** | **0.826** | **0.840** | **0.585** | **1.232** | **1.286** | **0.674** | **R.KFPSGTFEQVSQLVK.E** 14122 |
|  | 15459 | **733.38** | **2929.51** | **2929.35** | **0.16** | **0** | **1** | **48** | **4** | **---** | **---** | **---** | **---** | **---** | **---** | **K.SYLSMVGSCCTSASPTVCFLK.E** |
|  | 15594 | **992.21** | **2973.60** | **2973.67** | **-0.08** | **0** | **72** | **3.7e-006** | **1** | **1.288** | **1.149** | **0.714** | **1.581** | **1.497** | **0.921** | **K.VPTADLEDVLPLAEDITNILSK.C** 15588 15589 15590 15591 15592 15593 15595 15596 15597 15598 15599 15600 15601 15602 15603 15605 15606 15608 15609 15610 15611 15613 15614 15615 15616 15617 15618 15620 |
|  | 16683 | **826.90** | **3303.58** | **3303.58** | **-0.00** | **0** | **57** | **6.6e-005** | **1** | **---** | **---** | **---** | **---** | **---** | **---** | **K.HQPQEFPTYVEPTNDEICEAFR.K** |
|  | 17256 | **930.55** | **3718.18** | **3718.15** | **0.03** | **1** | **66** | **8.8e-006** | **1** | **0.243** | **0.273** | **0.150** | **0.771** | **0.977** | **0.428** | **K.LAQKVPTADLEDVLPLAEDITNILSK.C** 17253 17254 |
|  | 17935 | **1042.09** | **5205.39** | **5205.53** | **-0.14** | **1** | **4** | **3.7** | **1** | **---** | **---** | **---** | **---** | **---** | **---** | **K.TAMDVFVCTYFMPAAQLPELPDVELPTNKDVCDPGNTK.V** |

  


---

|  |  |
| --- | --- |
| **12.** | P0C0L4    **Mass:** 217666   **Score:** 1022   **Queries matched:** 38   **emPAI:** 0.09 |
|  | Complement C4-A OS=Homo sapiens GN=C4A PE=1 SV=1 |

|  |  |  |  |  |  |
| --- | --- | --- | --- | --- | --- |
|  | **Quantitation:** | **Ratio** | **Weighted** | **N** | **SD(geo)** |
|  |  | **Patient1-Art/Control** | **0.737** | **14** | **1.172** |
|  |  | **Patient1-Porta/Control** | **0.619** | **15** | **1.206** |
|  |  | **Patient1-Hepa/Control** | **0.589** | **14** | **1.185** |
|  |  | Patient2-Art/Control | 0.800 | 16 | NN |
|  |  | **Patient2-Porta/Control** | **0.879** | **16** | **1.272** |
|  |  | Patient2-Hepa/Control | 1.607 | 16 | 1.308 |

|  |  |  |  |  |  |  |  |  |  |  |  |  |  |  |  |  |
| --- | --- | --- | --- | --- | --- | --- | --- | --- | --- | --- | --- | --- | --- | --- | --- | --- |
|  | **Query** | **Observed** | **Mr(expt)** | **Mr(calc)** | **Delta** | **Miss** | **Score** | **Expect** | **Rank** | **Patient1-Art/Control** | **Patient1-Porta/Control** | **Patient1-Hepa/Control** | **Patient2-Art/Control** | **Patient2-Porta/Control** | **Patient2-Hepa/Control** | **Peptide** |
|  | 2382 | **476.78** | **951.55** | **951.58** | **-0.04** | **0** | **13** | **1.6** | **1** | **---** | **---** | **---** | **---** | **---** | **---** | **R.NFLVR.A** 2379 |
|  | 2729 | **491.77** | **981.53** | **981.59** | **-0.06** | **0** | **12** | **13** | **1** | **---** | **---** | **---** | **---** | **---** | **---** | **K.GSVFLR.N** 2724 2725 2742 2743 2747 |
|  | 3000 | **498.30** | **994.58** | **994.59** | **-0.01** | **0** | **16** | **0.59** | **1** | **---** | **---** | **---** | **---** | **---** | **---** | **R.IQQFR.K** |
|  | 3870 | **548.29** | **1094.57** | **1094.62** | **-0.05** | **0** | **3** | **52** | **4** | **---** | **---** | **---** | **---** | **---** | **---** | **K.LTSLSDR.Y** |
|  | 4658 | 601.31 | 1200.61 | 1200.68 | -0.08 | 0 | 10 | 5.3 | 7 | --- | --- | --- | --- | --- | --- | R.LSCPK.E |
|  | 4897 | **623.35** | **1244.68** | **1244.76** | **-0.07** | **0** | **2** | **30** | **3** | **---** | **---** | **---** | **---** | **---** | **---** | **R.LFETK.I** |
|  | 5311 | **428.96** | **1283.84** | **1283.70** | **0.15** | **0** | **2** | **50** | **1** | **---** | **---** | **---** | **---** | **---** | **---** | **R.GQIVFMNR.E** |
|  | 5652 | **669.33** | **1336.65** | **1336.85** | **-0.20** | **0** | **5** | **19** | **4** | **---** | **---** | **---** | **---** | **---** | **---** | **K.VLQIEK.E** |
|  | 6363 | **714.91** | **1427.80** | **1427.86** | **-0.06** | **0** | **0** | **74** | **4** | **---** | **---** | **---** | **---** | **---** | **---** | **R.VFALDQK.M** |
|  | 7037 | **753.92** | **1505.82** | **1505.84** | **-0.01** | **0** | **4** | **26** | **4** | **---** | **---** | **---** | **---** | **---** | **---** | **K.GLCVATPVQLR.V** |
|  | 8618 | **577.66** | **1729.97** | **1729.90** | **0.07** | **0** | **11** | **5.1** | **1** | **---** | **---** | **---** | **---** | **---** | **---** | **R.VDVQAGACEGK.L** |
|  | 9889 | **628.66** | **1882.97** | **1883.07** | **-0.10** | **2** | **1** | **51** | **2** | **---** | **---** | **---** | **---** | **---** | **---** | **R.ASCRLRLEPGK.E** |
|  | 10180 | **645.71** | **1934.12** | **1934.18** | **-0.05** | **0** | **65** | **2e-005** | **1** | **0.647** | **0.552** | **0.503** | **0.630** | **1.306** | **0.792** | **R.HLVPGAPFLLQALVR.E** |
|  | 10351 | **659.36** | **1975.07** | **1975.12** | **-0.05** | **0** | **30** | **0.07** | **1** | **---** | **---** | **---** | **---** | **---** | **---** | **R.DSSTWLTAFVLK.V** |
|  | 12243 | **752.39** | **2254.14** | **2254.31** | **-0.17** | **2** | **1** | **51** | **5** | **---** | **---** | **---** | **---** | **---** | **---** | **K.GYMRIQQFRK.A** |
|  | 13816 | **843.76** | **2528.25** | **2528.32** | **-0.07** | **0** | **79** | **6.1e-007** | **1** | **1.398** | **0.855** | **0.698** | **0.811** | **1.180** | **1.265** | **R.ALEILQEEDLIDEDDIPVR.S** 13818 13825 13827 13832 |
|  | 13901 | **852.39** | **2554.14** | **2554.13** | **0.02** | **0** | **100** | **1.8e-009** | **1** | **0.499** | **0.512** | **0.411** | **0.384** | **0.404** | **4.015** | **R.AACAQLNDFLQEYGTQGCQV.-** 13899 13900 13902 |
|  | 14890 | **929.84** | **2786.50** | **2786.50** | **0.01** | **0** | **132** | **4.2e-012** | **1** | **-0.003** | **0.300** | **0.390** | **0.816** | **0.811** | **0.482** | **R.VTASDPLDTLGSEGALSPGGVASLLR.L** 14882 14883 14884 14887 14889 14892 14893 |

  

|  |  |
| --- | --- |
|  | |
|  | **Proteins matching the same set of peptides:** |

|  |  |
| --- | --- |
|  | P0C0L5    **Mass:** 217642   **Score:** 1022   **Queries matched:** 38 |
|  | Complement C4-B OS=Homo sapiens GN=C4B PE=1 SV=1 |

---

|  |  |
| --- | --- |
| **13.** | P05155    **Mass:** 64430    **Score:** 791    **Queries matched:** 69   **emPAI:** 0.85 |
|  | Plasma protease C1 inhibitor OS=Homo sapiens GN=SERPING1 PE=1 SV=2 |

|  |  |  |  |  |  |
| --- | --- | --- | --- | --- | --- |
|  | **Quantitation:** | **Ratio** | **Weighted** | **N** | **SD(geo)** |
|  |  | **Patient1-Art/Control** | **0.891** | **27** | **1.114** |
|  |  | **Patient1-Porta/Control** | **0.785** | **27** | **1.101** |
|  |  | **Patient1-Hepa/Control** | **0.596** | **27** | **1.091** |
|  |  | **Patient2-Art/Control** | **0.834** | **27** | **1.056** |
|  |  | **Patient2-Porta/Control** | **1.079** | **27** | **1.058** |
|  |  | **Patient2-Hepa/Control** | **0.682** | **27** | **1.069** |

|  |  |  |  |  |  |  |  |  |  |  |  |  |  |  |  |  |
| --- | --- | --- | --- | --- | --- | --- | --- | --- | --- | --- | --- | --- | --- | --- | --- | --- |
|  | **Query** | **Observed** | **Mr(expt)** | **Mr(calc)** | **Delta** | **Miss** | **Score** | **Expect** | **Rank** | **Patient1-Art/Control** | **Patient1-Porta/Control** | **Patient1-Hepa/Control** | **Patient2-Art/Control** | **Patient2-Porta/Control** | **Patient2-Hepa/Control** | **Peptide** |
|  | 2387 | **477.25** | **952.49** | **952.53** | **-0.03** | **0** | **12** | **3.1** | **1** | **---** | **---** | **---** | **---** | **---** | **---** | **R.VYDPR.A** 2389 |
|  | 4400 | **581.32** | **1160.63** | **1160.70** | **-0.07** | **0** | **11** | **6.1** | **1** | **---** | **---** | **---** | **---** | **---** | **---** | **K.GFTTK.G** 4399 4402 4408 |
|  | 4736 | **607.82** | **1213.64** | **1213.66** | **-0.03** | **0** | **14** | **2.5** | **1** | **---** | **---** | **---** | **---** | **---** | **---** | **R.TLYSSSPR.V** 4734 |
|  | 6327 | **710.90** | **1419.78** | **1419.79** | **-0.01** | **0** | **40** | **0.0045** | **1** | **0.911** | **0.740** | **0.686** | **0.653** | **1.076** | **0.682** | **R.LLDSLPSDTR.L** 6323 6324 6325 6326 |
|  | 6844 | **745.45** | **1488.89** | **1488.90** | **-0.01** | **0** | **28** | **0.091** | **1** | **---** | **---** | **---** | **---** | **---** | **---** | **K.FQPTLLTLPR.I** 6832 6833 6834 6836 6837 6838 6839 6840 6841 6843 6847 6848 |
|  | 9367 | **605.96** | **1814.87** | **1814.96** | **-0.09** | **0** | **17** | **0.87** | **1** | **---** | **---** | **---** | **---** | **---** | **---** | **K.DFTCVHQALK.G** 9368 9377 |
|  | 9848 | **625.02** | **1872.03** | **1872.08** | **-0.05** | **0** | **38** | **0.012** | **1** | **1.105** | **0.917** | **0.771** | **1.072** | **1.159** | **0.766** | **K.TNLESILSYPK.D** |
|  | 10148 | **963.60** | **1925.18** | **1925.22** | **-0.04** | **0** | **64** | **2.4e-005** | **1** | **0.546** | **0.497** | **0.393** | **0.764** | **0.810** | **0.556** | **R.LVLLNAIYLSAK.W** 10144 10146 10149 10150 10152 10153 10154 10155 10156 10157 10158 10159 10160 10161 |
|  | 10652 | **680.72** | **2039.12** | **2039.17** | **-0.04** | **0** | **43** | **0.0037** | **1** | **0.873** | **0.735** | **0.482** | **0.916** | **1.014** | **0.735** | **K.YPVAHFIDQTLK.A** |
|  | 11196 | **1062.03** | **2122.05** | **2122.11** | **-0.06** | **0** | **8** | **8.1** | **1** | **---** | **---** | **---** | **---** | **---** | **---** | **K.VTTSQDMLSIMEK.L** |
|  | 12029 | **740.05** | **2217.13** | **2217.18** | **-0.05** | **0** | **1** | **45** | **5** | **---** | **---** | **---** | **---** | **---** | **---** | **R.LEDMEQALSPSVFK.A** |
|  | 12143 | **744.12** | **2229.34** | **2229.42** | **-0.09** | **0** | **(7)** | **12** | **1** | **---** | **---** | **---** | **---** | **---** | **---** | **R.LVLLNAIYLSAK.W** |
|  | 13451 | **618.87** | **2471.44** | **2471.47** | **-0.02** | **1** | **42** | **0.0035** | **1** | **0.862** | **0.830** | **0.548** | **1.013** | **1.171** | **0.635** | **K.KYPVAHFIDQTLK.A** 13449 13450 |
|  | 17012 | **891.50** | **3561.96** | **3561.92** | **0.04** | **0** | **76** | **1.4e-006** | **1** | **0.507** | **0.344** | **0.496** | **0.673** | **0.808** | **0.493** | **K.VETNMAFSPFSIASLLTQVLLGAGENTK.T** 17004 17005 17006 17007 17010 17011 17013 17014 17015 17016 17017 17018 17019 17020 |
|  | 17534 | **799.83** | **3994.09** | **3994.22** | **-0.13** | **1** | **19** | **0.67** | **1** | **---** | **---** | **---** | **---** | **---** | **---** | **K.KVETNMAFSPFSIASLLTQVLLGAGENTK.T** 17544 |

  


---

|  |  |
| --- | --- |
| **14.** | P04217    **Mass:** 58349    **Score:** 780    **Queries matched:** 101   **emPAI:** 1.53 |
|  | Alpha-1B-glycoprotein OS=Homo sapiens GN=A1BG PE=1 SV=3 |

|  |  |  |  |  |  |
| --- | --- | --- | --- | --- | --- |
|  | **Quantitation:** | **Ratio** | **Weighted** | **N** | **SD(geo)** |
|  |  | Patient1-Art/Control | 0.838 | 33 | NN |
|  |  | Patient1-Porta/Control | 0.765 | 33 | NN |
|  |  | Patient1-Hepa/Control | 0.586 | 32 | NN |
|  |  | Patient2-Art/Control | 0.964 | 33 | NN |
|  |  | Patient2-Porta/Control | 1.037 | 33 | NN |
|  |  | Patient2-Hepa/Control | 0.679 | 32 | NN |

|  |  |  |  |  |  |  |  |  |  |  |  |  |  |  |  |  |
| --- | --- | --- | --- | --- | --- | --- | --- | --- | --- | --- | --- | --- | --- | --- | --- | --- |
|  | **Query** | **Observed** | **Mr(expt)** | **Mr(calc)** | **Delta** | **Miss** | **Score** | **Expect** | **Rank** | **Patient1-Art/Control** | **Patient1-Porta/Control** | **Patient1-Hepa/Control** | **Patient2-Art/Control** | **Patient2-Porta/Control** | **Patient2-Hepa/Control** | **Peptide** |
|  | 1275 | **439.26** | **876.50** | **876.53** | **-0.03** | **0** | **20** | **0.54** | **1** | **---** | **---** | **---** | **---** | **---** | **---** | **R.DAVLR.C** 1257 1258 1262 1263 1264 1266 1267 1270 1271 1281 1282 1283 |
|  | 1868 | **455.26** | **908.50** | **908.58** | **-0.07** | **0** | **14** | **2** | **1** | **---** | **---** | **---** | **---** | **---** | **---** | **R.FALVR.E** 1864 1866 1867 1869 1870 1871 1872 1877 1878 1880 1884 |
|  | 3080 | **500.76** | **999.50** | **999.51** | **-0.02** | **0** | **11** | **3.6** | **1** | **---** | **---** | **---** | **---** | **---** | **---** | **K.TTAVCR.G** |
|  | 3959 | **555.28** | **1108.55** | **1108.69** | **-0.15** | **0** | **38** | **0.01** | **1** | **0.909** | **0.859** | **0.626** | **1.080** | **1.054** | **0.690** | **R.GVTFLLR.R** 3958 3960 3963 3966 3968 3972 3981 3984 |
|  | 5231 | **640.33** | **1278.64** | **1278.67** | **-0.03** | **0** | **35** | **0.021** | **1** | **0.833** | **0.690** | **0.622** | **0.853** | **0.920** | **0.653** | **R.CLAPLEGAR.F** 5226 5227 5228 5229 |
|  | 6120 | **696.90** | **1391.78** | **1391.78** | **-0.00** | **0** | **33** | **0.026** | **1** | **0.590** | **0.641** | **0.438** | **0.753** | **1.099** | **0.622** | **R.ATWSGAVLAGR.D** 6115 6116 6117 6118 6122 |
|  | 6754 | **493.65** | **1477.92** | **1477.93** | **-0.01** | **0** | **46** | **0.0013** | **1** | **0.980** | **0.714** | **0.648** | **1.232** | **1.089** | **0.666** | **K.LLELTGPK.S** 6752 6753 |
|  | 8218 | **559.61** | **1675.80** | **1675.89** | **-0.10** | **0** | **36** | **0.013** | **1** | **1.016** | **0.766** | **0.647** | **0.852** | **1.146** | **0.773** | **K.HQFLLTGDTQGR.Y** 8219 |
|  | 9731 | **923.53** | **1845.05** | **1845.05** | **0.00** | **0** | **31** | **0.052** | **1** | **0.741** | **0.826** | **0.643** | **0.931** | **1.095** | **0.766** | **R.LETPDFQLFK.N** 9726 9728 9729 |
|  | 10192 | **969.96** | **1937.90** | **1937.99** | **-0.09** | **0** | **78** | **4.6e-007** | **1** | **0.814** | **0.647** | **0.566** | **0.844** | **0.954** | **0.668** | **R.CEGPIPDVTFELLR.E** 10193 10194 10195 10196 10197 10198 10199 |
|  | 10610 | **507.75** | **2026.96** | **2027.16** | **-0.19** | **0** | **26** | **0.1** | **1** | **---** | **---** | **---** | **---** | **---** | **---** | **R.LELHVDGPPPRPQLR.A** 10611 10612 10613 |
|  | 11511 | **1085.08** | **2168.15** | **2168.16** | **-0.02** | **0** | **71** | **4.9e-006** | **1** | **0.567** | **0.559** | **0.419** | **0.748** | **0.936** | **0.644** | **K.VTLTCVAPLSGVDFQLR.R** 11500 11501 11503 11504 11515 11517 11519 11522 11529 11531 11532 11534 11535 |
|  | 14864 | **925.86** | **2774.56** | **2774.57** | **-0.00** | **0** | **72** | **4e-006** | **1** | **1.055** | **0.736** | **0.740** | **0.708** | **0.945** | **0.510** | **K.SLPAPWLSMAPVSWITPGLK.T** 14858 14859 14860 14862 14863 14865 |
|  | 15382 | **726.88** | **2903.49** | **2903.59** | **-0.10** | **0** | **48** | **0.00094** | **1** | **---** | **---** | **---** | **---** | **---** | **---** | **R.TPGAAANLELIFVGPQHAGNYR.C** 15381 15383 15384 15392 15395 15396 15397 |
|  | 17368 | **762.01** | **3804.99** | **3805.12** | **-0.12** | **1** | **46** | **0.0012** | **1** | **0.614** | **0.617** | **0.426** | **0.887** | **1.012** | **0.600** | **R.LETPDFQLFKNGVAQEPVHLDSPAIK.H** 17369 17370 17371 17372 |

  


---

|  |  |
| --- | --- |
| **15.** | P02763    **Mass:** 28244    **Score:** 729    **Queries matched:** 23   **emPAI:** 0.66 |
|  | Alpha-1-acid glycoprotein 1 OS=Homo sapiens GN=ORM1 PE=1 SV=1 |

|  |  |  |  |  |  |
| --- | --- | --- | --- | --- | --- |
|  | **Quantitation:** | **Ratio** | **Weighted** | **N** | **SD(geo)** |
|  |  | **Patient1-Art/Control** | **2.124** | **14** | **1.158** |
|  |  | **Patient1-Porta/Control** | **1.426** | **14** | **1.129** |
|  |  | Patient1-Hepa/Control | 1.249 | 14 | 1.141 |
|  |  | Patient2-Art/Control | 0.996 | 14 | NN |
|  |  | Patient2-Porta/Control | 1.180 | 14 | 1.112 |
|  |  | Patient2-Hepa/Control | 0.863 | 14 | NN |

|  |  |  |  |  |  |  |  |  |  |  |  |  |  |  |  |  |
| --- | --- | --- | --- | --- | --- | --- | --- | --- | --- | --- | --- | --- | --- | --- | --- | --- |
|  | **Query** | **Observed** | **Mr(expt)** | **Mr(calc)** | **Delta** | **Miss** | **Score** | **Expect** | **Rank** | **Patient1-Art/Control** | **Patient1-Porta/Control** | **Patient1-Hepa/Control** | **Patient2-Art/Control** | **Patient2-Porta/Control** | **Patient2-Hepa/Control** | **Peptide** |
|  | 3081 | **500.76** | **999.51** | **999.53** | **-0.02** | **0** | **6** | **9.9** | **1** | **---** | **---** | **---** | **---** | **---** | **---** | **R.EYQTR.Q** 3072 |
|  | 5990 | **686.84** | **1371.67** | **1371.74** | **-0.07** | **0** | **4** | **21** | **1** | **---** | **---** | **---** | **---** | **---** | **---** | **K.CEPLEK.Q** 5987 |
|  | 10627 | **1018.47** | **2034.93** | **2034.97** | **-0.04** | **0** | **91** | **2.5e-008** | **1** | **2.252** | **1.480** | **1.283** | **1.029** | **1.335** | **0.919** | **K.EQLGEFYEALDCLR.I** 10619 10620 10621 10622 10623 10624 10625 10626 10628 10629 10630 10631 10632 10633 10634 |
|  | 10761 | **686.38** | **2056.11** | **2056.15** | **-0.04** | **0** | **(38)** | **0.01** | **1** | **1.010** | **0.745** | **0.660** | **0.832** | **1.074** | **0.629** | **R.YVGGQEHFAHLLILR.D** |
|  | 12616 | **780.73** | **2339.18** | **2339.18** | **0.01** | **0** | **(9)** | **7.1** | **1** | **---** | **---** | **---** | **---** | **---** | **---** | **K.EQLGEFYEALDCLR.I** |
|  | 12670 | **591.07** | **2360.24** | **2360.36** | **-0.12** | **0** | **46** | **0.0015** | **1** | **---** | **---** | **---** | **---** | **---** | **---** | **R.YVGGQEHFAHLLILR.D** |

  


---

|  |  |
| --- | --- |
| **16.** | P00751    **Mass:** 103009   **Score:** 707    **Queries matched:** 68   **emPAI:** 0.53 |
|  | Complement factor B OS=Homo sapiens GN=CFB PE=1 SV=2 |

|  |  |  |  |  |  |
| --- | --- | --- | --- | --- | --- |
|  | **Quantitation:** | **Ratio** | **Weighted** | **N** | **SD(geo)** |
|  |  | **Patient1-Art/Control** | **0.833** | **8** | **1.188** |
|  |  | Patient1-Porta/Control | 0.770 | 9 | NN |
|  |  | Patient1-Hepa/Control | 0.632 | 8 | NN |
|  |  | **Patient2-Art/Control** | **0.778** | **7** | **1.106** |
|  |  | Patient2-Porta/Control | 0.989 | 9 | NN |
|  |  | **Patient2-Hepa/Control** | **0.763** | **7** | **1.061** |

|  |  |  |  |  |  |  |  |  |  |  |  |  |  |  |  |  |
| --- | --- | --- | --- | --- | --- | --- | --- | --- | --- | --- | --- | --- | --- | --- | --- | --- |
|  | **Query** | **Observed** | **Mr(expt)** | **Mr(calc)** | **Delta** | **Miss** | **Score** | **Expect** | **Rank** | **Patient1-Art/Control** | **Patient1-Porta/Control** | **Patient1-Hepa/Control** | **Patient2-Art/Control** | **Patient2-Porta/Control** | **Patient2-Hepa/Control** | **Peptide** |
|  | 956 | **432.23** | **862.44** | **862.55** | **-0.11** | **0** | **14** | **1.8** | **1** | **---** | **---** | **---** | **---** | **---** | **---** | **R.GLTLR.G** 957 958 964 965 966 968 975 |
|  | 5502 | **660.36** | **1318.70** | **1318.74** | **-0.04** | **0** | **26** | **0.12** | **1** | **---** | **---** | **---** | **---** | **---** | **---** | **K.DISEVVTPR.F** 5501 5504 |
|  | 5786 | **677.36** | **1352.70** | **1352.71** | **-0.01** | **0** | **50** | **0.001** | **1** | **0.433** | **0.525** | **0.521** | **0.627** | **0.775** | **0.760** | **K.LQDEDLGFL.-** |
|  | 7514 | **793.46** | **1584.90** | **1584.92** | **-0.02** | **0** | **32** | **0.056** | **1** | **---** | **---** | **---** | **---** | **---** | **---** | **K.CLVNLIEK.V** 7511 7516 |
|  | 8026 | **553.97** | **1658.89** | **1658.93** | **-0.05** | **0** | **2** | **41** | **1** | **---** | **---** | **---** | **---** | **---** | **---** | **K.ALFVSEEEK.K** |
|  | 8279 | **563.29** | **1686.85** | **1686.99** | **-0.13** | **0** | **23** | **0.32** | **1** | **---** | **---** | **---** | **---** | **---** | **---** | **R.GDSGGPLIVHK.R** |
|  | 8929 | **882.51** | **1763.01** | **1763.03** | **-0.02** | **0** | **49** | **0.00093** | **1** | **1.330** | **1.262** | **0.890** | **1.022** | **1.188** | **0.883** | **K.EELLPAQDIK.A** 8930 |
|  | 9765 | **617.70** | **1850.07** | **1850.11** | **-0.04** | **1** | **8** | **9.8** | **1** | **---** | **---** | **---** | **---** | **---** | **---** | **K.VKDISEVVTPR.F** 9764 |
|  | 10026 | **633.65** | **1897.93** | **1898.02** | **-0.10** | **0** | **7** | **10** | **1** | **---** | **---** | **---** | **---** | **---** | **---** | **R.LPPTTTCQQQK.E** |
|  | 10081 | **958.02** | **1914.03** | **1914.06** | **-0.03** | **1** | **27** | **0.14** | **1** | **---** | **---** | **---** | **---** | **---** | **---** | **K.EKLQDEDLGFL.-** 10080 10085 |
|  | 10757 | **515.02** | **2056.03** | **2056.18** | **-0.15** | **1** | **22** | **0.33** | **1** | **---** | **---** | **---** | **---** | **---** | **---** | **K.KDNEQHVFK.V** 10762 |
|  | 10984 | **698.05** | **2091.12** | **2091.23** | **-0.11** | **1** | **16** | **1.7** | **1** | **---** | **---** | **---** | **---** | **---** | **---** | **K.ALFVSEEEKK.L** 10985 |
|  | 11860 | **1099.01** | **2196.00** | **2195.98** | **0.02** | **0** | **57** | **5.3e-005** | **1** | **0.889** | **0.701** | **0.650** | **0.700** | **1.103** | **0.735** | **R.FLCTGGVSPYADPNTCR.G** 11856 11858 11859 11861 11862 11863 11864 |
|  | 12534 | **579.56** | **2314.20** | **2314.27** | **-0.06** | **0** | **25** | **0.2** | **1** | **---** | **---** | **---** | **---** | **---** | **---** | **K.QLNEINYEDHK.L** 12533 12535 |
|  | 13232 | **817.77** | **2450.30** | **2450.32** | **-0.02** | **0** | **47** | **0.0012** | **1** | **1.135** | **0.934** | **0.609** | **1.035** | **1.162** | **0.686** | **K.EAGIPEFYDYDVALIK.L** 13241 |
|  | 14760 | **919.13** | **2754.37** | **2754.52** | **-0.15** | **0** | **(22)** | **0.31** | **1** | **---** | **---** | **---** | **---** | **---** | **---** | **K.EAGIPEFYDYDVALIK.L** |
|  | 15286 | **961.86** | **2882.57** | **2882.62** | **-0.05** | **1** | **2** | **42** | **9** | **---** | **---** | **---** | **---** | **---** | **---** | **K.KEAGIPEFYDYDVALIK.L** |
|  | 16183 | **1027.20** | **3078.57** | **3078.61** | **-0.04** | **0** | **2** | **37** | **3** | **---** | **---** | **---** | **---** | **---** | **---** | **R.HVIILMTDGLHNMGGDPITVIDEIR.D** 16184 16188 |
|  | 16246 | **1036.84** | **3107.51** | **3107.54** | **-0.03** | **0** | **100** | **3.7e-009** | **1** | **---** | **---** | **---** | **---** | **---** | **---** | **R.LLQEGQALEYVCPSGFYPYPVQTR.T** 16241 16242 16244 16245 16247 16248 16249 16250 16251 16252 16253 16254 16255 16256 16258 16259 16261 |
|  | 16809 | **853.95** | **3411.77** | **3411.75** | **0.03** | **0** | **(35)** | **0.018** | **1** | **---** | **---** | **---** | **---** | **---** | **---** | **R.LLQEGQALEYVCPSGFYPYPVQTR.T** |
|  | 16812 | **1138.27** | **3411.80** | **3411.75** | **0.05** | **0** | **(2)** | **33** | **2** | **---** | **---** | **---** | **---** | **---** | **---** | **R.LLQEGQALEYVCPSGFYPYPVQTR.T** 16807 |

  


---

|  |  |
| --- | --- |
| **17.** | Q14624    **Mass:** 116254   **Score:** 703    **Queries matched:** 43   **emPAI:** 0.24 |
|  | Inter-alpha-trypsin inhibitor heavy chain H4 OS=Homo sapiens GN=ITIH4 PE=1 SV=4 |

|  |  |  |  |  |  |
| --- | --- | --- | --- | --- | --- |
|  | **Quantitation:** | **Ratio** | **Weighted** | **N** | **SD(geo)** |
|  |  | Patient1-Art/Control | 1.100 | 18 | NN |
|  |  | Patient1-Porta/Control | 1.017 | 18 | NN |
|  |  | **Patient1-Hepa/Control** | **0.762** | **19** | **1.431** |
|  |  | Patient2-Art/Control | 0.786 | 19 | NN |
|  |  | **Patient2-Porta/Control** | **1.164** | **19** | **1.288** |
|  |  | Patient2-Hepa/Control | 0.799 | 19 | 1.413 |

|  |  |  |  |  |  |  |  |  |  |  |  |  |  |  |  |  |
| --- | --- | --- | --- | --- | --- | --- | --- | --- | --- | --- | --- | --- | --- | --- | --- | --- |
|  | **Query** | **Observed** | **Mr(expt)** | **Mr(calc)** | **Delta** | **Miss** | **Score** | **Expect** | **Rank** | **Patient1-Art/Control** | **Patient1-Porta/Control** | **Patient1-Hepa/Control** | **Patient2-Art/Control** | **Patient2-Porta/Control** | **Patient2-Hepa/Control** | **Peptide** |
|  | 3551 | **526.76** | **1051.51** | **1051.55** | **-0.03** | **0** | **30** | **0.043** | **1** | **0.672** | **0.751** | **0.708** | **0.978** | **0.964** | **0.637** | **R.LCVDPR.H** 3552 |
|  | 4582 | **591.36** | **1180.72** | **1180.76** | **-0.05** | **0** | **12** | **4** | **1** | **---** | **---** | **---** | **---** | **---** | **---** | **R.EALIK.I** 4573 4576 |
|  | 4855 | **616.80** | **1231.59** | **1231.71** | **-0.12** | **0** | **37** | **0.0097** | **1** | **0.976** | **0.878** | **0.712** | **0.496** | **1.086** | **0.732** | **K.ILDDLSPR.D** 4856 |
|  | 8850 | **877.01** | **1752.00** | **1752.02** | **-0.03** | **0** | **62** | **4.7e-005** | **1** | **1.286** | **1.234** | **0.840** | **1.140** | **1.300** | **0.882** | **R.GPDVLTATVSGK.L** 8838 8842 8843 8847 8851 |
|  | 9359 | **604.70** | **1811.08** | **1811.15** | **-0.07** | **1** | **21** | **0.56** | **1** | **---** | **---** | **---** | **---** | **---** | **---** | **R.RLGVYELLLK.V** 9361 |
|  | 11098 | **1058.58** | **2115.15** | **2115.15** | **-0.00** | **0** | **19** | **0.88** | **1** | **---** | **---** | **---** | **---** | **---** | **---** | **K.SPEQQETVLDGNLIIR.Y** |
|  | 13396 | **616.86** | **2463.41** | **2463.43** | **-0.02** | **1** | **12** | **3.9** | **1** | **---** | **---** | **---** | **---** | **---** | **---** | **K.WKETLFSVMPGLK.M** 13395 |
|  | 14437 | **907.13** | **2718.38** | **2718.38** | **0.00** | **0** | **61** | **4.1e-005** | **1** | **1.028** | **0.391** | **0.418** | **0.771** | **1.338** | **3.153** | **R.QGPVNLLSDPEQGVEVTGQYER.E** |
|  | 15324 | **966.52** | **2896.54** | **2896.57** | **-0.03** | **0** | **66** | **1.6e-005** | **1** | **0.832** | **0.726** | **0.380** | **0.641** | **0.945** | **0.569** | **R.LPEGSVSLIILLTDGDPTVGETNPR.S** 15319 15320 15321 15323 15325 15327 15328 15329 15330 15331 15333 15334 15335 |
|  | 17352 | **950.95** | **3799.79** | **3799.87** | **-0.08** | **0** | **115** | **8e-011** | **1** | **1.331** | **0.795** | **1.246** | **1.494** | **1.311** | **1.351** | **R.SFAAGIQALGGTNINDAMLMAVQLLDSSNQEER.L** 17350 17351 17356 17357 17359 17360 17362 17363 |
|  | 17699 | **852.87** | **4259.31** | **4259.30** | **0.00** | **0** | **0** | **42** | **1** | **---** | **---** | **---** | **---** | **---** | **---** | **R.AISGGSIQIENGYFVHYFAPEGLTTMPK.N** |

  


---

|  |  |
| --- | --- |
| **18.** | P08603    **Mass:** 167416   **Score:** 663    **Queries matched:** 72   **emPAI:** 0.33 |
|  | Complement factor H OS=Homo sapiens GN=CFH PE=1 SV=4 |

|  |  |  |  |  |  |
| --- | --- | --- | --- | --- | --- |
|  | **Quantitation:** | **Ratio** | **Weighted** | **N** | **SD(geo)** |
|  |  | Patient1-Art/Control | 1.001 | 23 | 1.111 |
|  |  | **Patient1-Porta/Control** | **0.860** | **23** | **1.103** |
|  |  | **Patient1-Hepa/Control** | **0.661** | **23** | **1.107** |
|  |  | **Patient2-Art/Control** | **0.792** | **23** | **1.126** |
|  |  | **Patient2-Porta/Control** | **1.067** | **22** | **1.064** |
|  |  | **Patient2-Hepa/Control** | **0.700** | **23** | **1.094** |

|  |  |  |  |  |  |  |  |  |  |  |  |  |  |  |  |  |
| --- | --- | --- | --- | --- | --- | --- | --- | --- | --- | --- | --- | --- | --- | --- | --- | --- |
|  | **Query** | **Observed** | **Mr(expt)** | **Mr(calc)** | **Delta** | **Miss** | **Score** | **Expect** | **Rank** | **Patient1-Art/Control** | **Patient1-Porta/Control** | **Patient1-Hepa/Control** | **Patient2-Art/Control** | **Patient2-Porta/Control** | **Patient2-Hepa/Control** | **Peptide** |
|  | 4926 | **626.90** | **1251.79** | **1251.80** | **-0.01** | **0** | **17** | **1.4** | **1** | **---** | **---** | **---** | **---** | **---** | **---** | **K.VGEVLK.F** 4913 4915 4917 |
|  | 5926 | **456.57** | **1366.70** | **1366.79** | **-0.09** | **0** | **34** | **0.026** | **1** | **0.906** | **0.815** | **0.538** | **1.153** | **1.098** | **0.565** | **K.IDVHLVPDR.K** 5925 |
|  | 5989 | **686.83** | **1371.64** | **1371.74** | **-0.10** | **0** | **17** | **0.83** | **1** | **---** | **---** | **---** | **---** | **---** | **---** | **R.ECELPK.I** 5987 5988 5990 5991 5993 |
|  | 6346 | **475.24** | **1422.70** | **1422.69** | **0.01** | **0** | **28** | **0.1** | **1** | **---** | **---** | **---** | **---** | **---** | **---** | **K.CLHPCVISR.E** 6344 |
|  | 6470 | **721.36** | **1440.71** | **1440.76** | **-0.04** | **0** | **(7)** | **9.5** | **1** | **---** | **---** | **---** | **---** | **---** | **---** | **R.SLGNVIMVCR.K** |
|  | 6618 | **729.37** | **1456.72** | **1456.75** | **-0.03** | **0** | **28** | **0.09** | **1** | **---** | **---** | **---** | **---** | **---** | **---** | **R.SLGNVIMVCR.K** 6616 6617 6619 |
|  | 6763 | **741.82** | **1481.63** | **1481.69** | **-0.07** | **0** | **22** | **0.14** | **1** | **---** | **---** | **---** | **---** | **---** | **---** | **K.LSYTCEGGFR.I** |
|  | 7235 | **768.41** | **1534.81** | **1534.71** | **0.11** | **0** | **6** | **14** | **1** | **---** | **---** | **---** | **---** | **---** | **---** | **R.TGDEITYQCR.N** |
|  | 7675 | **809.87** | **1617.73** | **1617.76** | **-0.03** | **0** | **20** | **0.37** | **1** | **---** | **---** | **---** | **---** | **---** | **---** | **K.SCDIPVFMNAR.T** 7673 7674 |
|  | 8702 | **581.34** | **1741.00** | **1741.05** | **-0.05** | **0** | **26** | **0.17** | **1** | **---** | **---** | **---** | **---** | **---** | **---** | **R.RPYFPVAVGK.Y** |
|  | 8824 | **876.93** | **1751.84** | **1751.90** | **-0.07** | **0** | **53** | **0.00024** | **1** | **1.391** | **1.127** | **0.829** | **0.982** | **1.169** | **0.776** | **R.TGESVEFVCK.R** 8835 8844 8846 8848 |
|  | 9127 | 596.35 | 1786.02 | 1785.90 | 0.12 | 0 | (6) | 18 | 2 | --- | --- | --- | --- | --- | --- | K.LSYTCEGGFR.I |
|  | 9240 | **450.77** | **1799.04** | **1799.09** | **-0.05** | **1** | **20** | **0.69** | **1** | **---** | **---** | **---** | **---** | **---** | **---** | **K.IDVHLVPDRK.K** |
|  | 9783 | **619.65** | **1855.94** | **1856.01** | **-0.08** | **0** | **44** | **0.0025** | **1** | **1.126** | **0.909** | **0.637** | **0.499** | **1.002** | **0.457** | **R.WQSIPLCVEK.I** |
|  | 9962 | **631.05** | **1890.13** | **1890.13** | **-0.00** | **1** | **30** | **0.082** | **1** | **---** | **---** | **---** | **---** | **---** | **---** | **R.KGEWVALNPLR.K** |
|  | 10512 | **668.71** | **2003.11** | **2003.19** | **-0.08** | **0** | **36** | **0.017** | **1** | **1.109** | **0.991** | **0.644** | **0.885** | **1.114** | **0.742** | **K.SSNLIILEEHLK.N** |
|  | 10926 | **1040.01** | **2078.01** | **2078.08** | **-0.07** | **0** | **68** | **7.5e-006** | **1** | **0.780** | **0.668** | **0.463** | **0.665** | **0.996** | **0.650** | **K.CFEGFGIDGPAIAK.C** 10924 10927 10928 10930 10931 10933 10934 10935 10936 |
|  | 12516 | **1157.59** | **2313.16** | **2313.14** | **0.02** | **0** | **27** | **0.1** | **1** | **---** | **---** | **---** | **---** | **---** | **---** | **R.DTSCVNPPTVQNAYIVSR.Q** 12515 12517 12518 12520 |
|  | 13095 | **608.09** | **2428.33** | **2428.34** | **-0.01** | **0** | **4** | **26** | **1** | **---** | **---** | **---** | **---** | **---** | **---** | **K.SIDVACHPGYALPK.A** |
|  | 14155 | **874.77** | **2621.30** | **2621.30** | **-0.00** | **0** | **57** | **8.9e-005** | **1** | **1.549** | **1.201** | **0.805** | **0.804** | **1.298** | **0.795** | **K.TDCLSLPSFENAIPMGEK.K** 14146 14147 14148 14149 14150 14151 14152 14153 14156 14157 14158 14159 |
|  | 14565 | **913.10** | **2736.29** | **2736.27** | **0.01** | **0** | **64** | **1.2e-005** | **1** | **0.811** | **0.615** | **0.366** | **0.430** | **0.770** | **0.548** | **R.ECDTDGWTNDIPICEVVK.C** 14564 |
|  | 15440 | **728.89** | **2911.53** | **2911.50** | **0.03** | **0** | **31** | **0.043** | **1** | **0.893** | **0.770** | **0.953** | **0.739** | **0.982** | **0.795** | **R.SITCIHGVWTQLPQCVAIDK.L** 15437 15438 15439 |
|  | 16984 | **877.94** | **3507.74** | **3507.75** | **-0.01** | **0** | **23** | **0.21** | **1** | **---** | **---** | **---** | **---** | **---** | **---** | **K.RPCGHPGDTPFGTFTLTGGNVFEYGVK.A** |
|  | 17684 | **1048.74** | **4190.94** | **4190.96** | **-0.02** | **1** | **3** | **9.2** | **1** | **---** | **---** | **---** | **---** | **---** | **---** | **R.FVCNSGYKIEGDEEMHCSDDGFWSK.E** |

  


---

|  |  |
| --- | --- |
| **19.** | P10909    **Mass:** 62047    **Score:** 613    **Queries matched:** 34   **emPAI:** 0.26 |
|  | Clusterin OS=Homo sapiens GN=CLU PE=1 SV=1 |

|  |  |  |  |  |  |
| --- | --- | --- | --- | --- | --- |
|  | **Quantitation:** | **Ratio** | **Weighted** | **N** | **SD(geo)** |
|  |  | **Patient1-Art/Control** | **0.760** | **20** | **1.071** |
|  |  | Patient1-Porta/Control | 0.743 | 21 | NN |
|  |  | **Patient1-Hepa/Control** | **0.542** | **21** | **1.065** |
|  |  | Patient2-Art/Control | 0.875 | 21 | NN |
|  |  | **Patient2-Porta/Control** | **1.092** | **21** | **1.042** |
|  |  | **Patient2-Hepa/Control** | **0.719** | **21** | **1.059** |

|  |  |  |  |  |  |  |  |  |  |  |  |  |  |  |  |  |
| --- | --- | --- | --- | --- | --- | --- | --- | --- | --- | --- | --- | --- | --- | --- | --- | --- |
|  | **Query** | **Observed** | **Mr(expt)** | **Mr(calc)** | **Delta** | **Miss** | **Score** | **Expect** | **Rank** | **Patient1-Art/Control** | **Patient1-Porta/Control** | **Patient1-Hepa/Control** | **Patient2-Art/Control** | **Patient2-Porta/Control** | **Patient2-Hepa/Control** | **Peptide** |
|  | 3777 | **542.29** | **1082.57** | **1082.60** | **-0.04** | **0** | **11** | **7.7** | **1** | **---** | **---** | **---** | **---** | **---** | **---** | **K.ALQEYR.K** 3781 |
|  | 8336 | **849.41** | **1696.82** | **1696.89** | **-0.08** | **0** | **77** | **1.1e-006** | **1** | **0.861** | **0.844** | **0.560** | **1.070** | **1.181** | **0.722** | **R.ASSIIDELFQDR.F** 8337 8338 8339 8340 8341 8342 8343 8344 8345 8346 8347 |
|  | 8574 | **576.00** | **1724.97** | **1725.01** | **-0.04** | **0** | **23** | **0.33** | **1** | **---** | **---** | **---** | **---** | **---** | **---** | **K.TLLSNLEEAK.K** |
|  | 11461 | **720.11** | **2157.30** | **2157.31** | **-0.02** | **1** | **11** | **5.3** | **1** | **---** | **---** | **---** | **---** | **---** | **---** | **R.KTLLSNLEEAK.K** 11460 |
|  | 11737 | **1089.61** | **2177.20** | **2177.19** | **0.01** | **0** | **66** | **1.8e-005** | **1** | **0.533** | **0.533** | **0.499** | **0.277** | **0.898** | **0.576** | **K.LFDSDPITVTVPVEVSR.K** 11721 11723 11724 11725 11726 11727 11729 11731 11734 11740 11741 11743 11745 11748 |
|  | 12652 | **787.39** | **2359.16** | **2359.20** | **-0.04** | **0** | **35** | **0.015** | **1** | **1.335** | **1.273** | **0.824** | **0.902** | **1.131** | **0.900** | **R.EILSVDCSTNNPSQAK.L** 12653 |

  


---

|  |  |
| --- | --- |
| **20.** | P02790    **Mass:** 58934    **Score:** 561    **Queries matched:** 77   **emPAI:** 0.63 |
|  | Hemopexin OS=Homo sapiens GN=HPX PE=1 SV=2 |

|  |  |  |  |  |  |
| --- | --- | --- | --- | --- | --- |
|  | **Quantitation:** | **Ratio** | **Weighted** | **N** | **SD(geo)** |
|  |  | Patient1-Art/Control | 1.133 | 10 | NN |
|  |  | **Patient1-Porta/Control** | **0.894** | **10** | **1.133** |
|  |  | **Patient1-Hepa/Control** | **0.693** | **10** | **1.145** |
|  |  | **Patient2-Art/Control** | **1.294** | **10** | **1.123** |
|  |  | **Patient2-Porta/Control** | **1.276** | **10** | **1.097** |
|  |  | **Patient2-Hepa/Control** | **0.816** | **10** | **1.112** |

|  |  |  |  |  |  |  |  |  |  |  |  |  |  |  |  |  |
| --- | --- | --- | --- | --- | --- | --- | --- | --- | --- | --- | --- | --- | --- | --- | --- | --- |
|  | **Query** | **Observed** | **Mr(expt)** | **Mr(calc)** | **Delta** | **Miss** | **Score** | **Expect** | **Rank** | **Patient1-Art/Control** | **Patient1-Porta/Control** | **Patient1-Hepa/Control** | **Patient2-Art/Control** | **Patient2-Porta/Control** | **Patient2-Hepa/Control** | **Peptide** |
|  | 1583 | **448.22** | **894.43** | **894.51** | **-0.07** | **0** | **15** | **1.1** | **1** | **---** | **---** | **---** | **---** | **---** | **---** | **R.LDTSR.D** 1582 1584 1585 1586 1587 1588 1590 1591 1595 1596 |
|  | 2174 | **469.25** | **936.49** | **936.53** | **-0.05** | **0** | **22** | **0.16** | **1** | **---** | **---** | **---** | **---** | **---** | **---** | **R.FDPVR.G** 2166 2167 2168 2169 2171 2175 2176 2178 2182 2185 |
|  | 2435 | **479.77** | **957.53** | **957.56** | **-0.02** | **0** | **5** | **5.5** | **1** | **---** | **---** | **---** | **---** | **---** | **---** | **R.GEVPPR.Y** 2438 2442 |
|  | 3542 | **525.80** | **1049.58** | **1049.60** | **-0.02** | **0** | **33** | **0.02** | **1** | **0.970** | **0.915** | **0.678** | **1.414** | **1.198** | **0.726** | **R.ELISER.W** 3532 3533 3534 3535 3536 3537 3539 3541 3543 3545 3546 |
|  | 4064 | **562.81** | **1123.61** | **1123.72** | **-0.11** | **0** | **2** | **42** | **3** | **---** | **---** | **---** | **---** | **---** | **---** | **K.LNAAK.A** |
|  | 6011 | 687.35 | 1372.69 | 1372.80 | -0.10 | 0 | 17 | 1.5 | 1 | --- | --- | --- | --- | --- | --- | K.GEFVWK.S 6010 |
|  | 6527 | **726.32** | **1450.63** | **1450.64** | **-0.01** | **0** | **22** | **0.17** | **1** | **---** | **---** | **---** | **---** | **---** | **---** | **R.DYFMPCPGR.G** 6525 |
|  | 7119 | **762.88** | **1523.75** | **1523.80** | **-0.06** | **0** | **59** | **7.7e-005** | **1** | **1.272** | **0.950** | **0.701** | **1.358** | **1.345** | **0.855** | **K.NFPSPVDAAFR.Q** 7118 7120 |
|  | 7427 | **524.94** | **1571.80** | **1571.87** | **-0.07** | **1** | **15** | **1.8** | **1** | **---** | **---** | **---** | **---** | **---** | **---** | **R.FDPVRGEVPPR.Y** 7428 7429 7430 7432 7434 7435 |
|  | 7865 | **545.93** | **1634.75** | **1634.83** | **-0.08** | **0** | **9** | **4.5** | **1** | **---** | **---** | **---** | **---** | **---** | **---** | **K.VDGALCMEK.S** |
|  | 8673 | **580.03** | **1737.06** | **1737.06** | **0.01** | **1** | **19** | **0.75** | **1** | **---** | **---** | **---** | **---** | **---** | **---** | **R.RLWWLDLK.S** 8668 8669 8670 |
|  | 8802 | **875.47** | **1748.93** | **1748.99** | **-0.06** | **0** | **18** | **1** | **1** | **---** | **---** | **---** | **---** | **---** | **---** | **K.GGYTLVSGYPK.R** |
|  | 10993 | **698.35** | **2092.02** | **2092.05** | **-0.03** | **0** | **28** | **0.071** | **1** | **---** | **---** | **---** | **---** | **---** | **---** | **R.YYCFQGNQFLR.F** 10990 10992 10998 11001 11003 |
|  | 10997 | **698.35** | **2092.03** | **2092.05** | **-0.01** | **0** | **(8)** | **8.4** | **1** | **---** | **---** | **---** | **---** | **---** | **---** | **R.YYCFQGNQFLR.F** |
|  | 13180 | **816.11** | **2445.30** | **2445.29** | **0.01** | **0** | **22** | **0.43** | **1** | **---** | **---** | **---** | **---** | **---** | **---** | **K.SGAQATWTELPWPHEK.V** 13179 |
|  | 14226 | **886.42** | **2656.24** | **2656.33** | **-0.09** | **0** | **93** | **1.4e-008** | **1** | **0.818** | **0.710** | **0.753** | **1.333** | **1.233** | **0.723** | **K.LLQDEFPGIPSPLDAAVECHR.G** 14224 14225 14228 14229 14230 |
|  | 14913 | **931.11** | **2790.31** | **2790.40** | **-0.09** | **0** | **142** | **2e-013** | **1** | **0.834** | **1.031** | **0.477** | **1.056** | **1.228** | **0.766** | **K.EVGTPHGIILDSVDAAFICPGSSR.L** 14911 14918 14919 |

  


---

|  |  |
| --- | --- |
| **21.** | P01008    **Mass:** 64497    **Score:** 498    **Queries matched:** 30   **emPAI:** 0.40 |
|  | Antithrombin-III OS=Homo sapiens GN=SERPINC1 PE=1 SV=1 |

|  |  |  |  |  |  |
| --- | --- | --- | --- | --- | --- |
|  | **Quantitation:** | **Ratio** | **Weighted** | **N** | **SD(geo)** |
|  |  | **Patient1-Art/Control** | **0.717** | **13** | **1.279** |
|  |  | **Patient1-Porta/Control** | **0.707** | **13** | **1.181** |
|  |  | **Patient1-Hepa/Control** | **0.391** | **13** | **1.326** |
|  |  | **Patient2-Art/Control** | **1.178** | **11** | **1.122** |
|  |  | **Patient2-Porta/Control** | **1.334** | **13** | **1.250** |
|  |  | **Patient2-Hepa/Control** | **0.648** | **13** | **1.162** |

|  |  |  |  |  |  |  |  |  |  |  |  |  |  |  |  |  |
| --- | --- | --- | --- | --- | --- | --- | --- | --- | --- | --- | --- | --- | --- | --- | --- | --- |
|  | **Query** | **Observed** | **Mr(expt)** | **Mr(calc)** | **Delta** | **Miss** | **Score** | **Expect** | **Rank** | **Patient1-Art/Control** | **Patient1-Porta/Control** | **Patient1-Hepa/Control** | **Patient2-Art/Control** | **Patient2-Porta/Control** | **Patient2-Hepa/Control** | **Peptide** |
|  | 3180 | **502.77** | **1003.53** | **1003.57** | **-0.04** | **0** | **11** | **2.5** | **1** | **---** | **---** | **---** | **---** | **---** | **---** | **R.SLNPNR.V** 3186 3191 |
|  | 4284 | **577.81** | **1153.61** | **1153.60** | **0.01** | **0** | **16** | **2.2** | **1** | **---** | **---** | **---** | **---** | **---** | **---** | **K.FSPENTR.K** 4282 4283 4285 |
|  | 6666 | **490.30** | **1467.88** | **1467.89** | **-0.01** | **0** | **9** | **7.7** | **1** | **---** | **---** | **---** | **---** | **---** | **---** | **K.LQPLDFK.E** |
|  | 7125 | **509.31** | **1524.90** | **1524.92** | **-0.02** | **1** | **8** | **12** | **2** | **---** | **---** | **---** | **---** | **---** | **---** | **R.RVWELSK.A** |
|  | 7240 | **512.95** | **1535.84** | **1535.92** | **-0.09** | **0** | **21** | **0.52** | **1** | **---** | **---** | **---** | **---** | **---** | **---** | **K.ANRPFLVFIR.E** |
|  | 8466 | **855.41** | **1708.80** | **1708.95** | **-0.15** | **0** | **42** | **0.0029** | **1** | **0.718** | **0.691** | **0.364** | **1.195** | **1.357** | **0.628** | **R.EVPLNTIIFMGR.V** 8468 8469 8471 8472 |
|  | 8647 | **867.90** | **1733.78** | **1733.79** | **-0.02** | **0** | **31** | **0.027** | **1** | **0.653** | **0.770** | **0.375** | **1.134** | **1.443** | **0.743** | **R.DIPMNPMCIYR.S** |
|  | 8650 | **579.00** | **1733.99** | **1734.06** | **-0.07** | **1** | **12** | **4.4** | **1** | **---** | **---** | **---** | **---** | **---** | **---** | **K.SKLPGIVAEGR.D** |
|  | 10643 | **680.39** | **2038.16** | **2038.19** | **-0.03** | **0** | **32** | **0.042** | **1** | **1.057** | **0.843** | **0.477** | **1.288** | **1.198** | **0.920** | **R.VAEGTQVLELPFK.G** |
|  | 12076 | **556.31** | **2221.21** | **2221.21** | **-0.00** | **0** | **5** | **20** | **1** | **---** | **---** | **---** | **---** | **---** | **---** | **R.DDLYVSDAFHK.A** |
|  | 13452 | **825.07** | **2472.20** | **2472.30** | **-0.10** | **0** | **82** | **2.5e-007** | **1** | **1.182** | **0.996** | **0.747** | **1.334** | **1.486** | **0.894** | **K.EQLQDMGLVDLFSPEK.S** 13453 13455 13457 13458 13459 |
|  | 14023 | **865.79** | **2594.35** | **2594.35** | **-0.00** | **0** | **95** | **2e-008** | **1** | **0.600** | **0.914** | **0.869** | **0.687** | **1.278** | **0.808** | **K.AFLEVNEEGSEAAASTAVVIAGR.S** 14020 14021 |
|  | 14827 | **923.47** | **2767.40** | **2767.43** | **-0.03** | **1** | **3** | **25** | **2** | **---** | **---** | **---** | **---** | **---** | **---** | **R.DIPMNPMCIYRSPEK.K** |
|  | 15457 | **975.16** | **2922.47** | **2922.53** | **-0.06** | **0** | **50** | **0.00052** | **1** | **1.208** | **0.946** | **0.389** | **1.019** | **0.954** | **1.044** | **K.NDNDNIFLSPLSISTAFAMTK.L** |

  


---

|  |  |
| --- | --- |
| **22.** | P02765    **Mass:** 45115    **Score:** 448    **Queries matched:** 41   **emPAI:** 1.22 |
|  | Alpha-2-HS-glycoprotein OS=Homo sapiens GN=AHSG PE=1 SV=1 |

|  |  |  |  |  |  |
| --- | --- | --- | --- | --- | --- |
|  | **Quantitation:** | **Ratio** | **Weighted** | **N** | **SD(geo)** |
|  |  | **Patient1-Art/Control** | **0.739** | **15** | **1.172** |
|  |  | **Patient1-Porta/Control** | **0.682** | **15** | **1.117** |
|  |  | **Patient1-Hepa/Control** | **0.479** | **15** | **1.175** |
|  |  | **Patient2-Art/Control** | **0.978** | **15** | **1.050** |
|  |  | **Patient2-Porta/Control** | **1.277** | **15** | **1.031** |
|  |  | **Patient2-Hepa/Control** | **0.740** | **14** | **1.050** |

|  |  |  |  |  |  |  |  |  |  |  |  |  |  |  |  |  |
| --- | --- | --- | --- | --- | --- | --- | --- | --- | --- | --- | --- | --- | --- | --- | --- | --- |
|  | **Query** | **Observed** | **Mr(expt)** | **Mr(calc)** | **Delta** | **Miss** | **Score** | **Expect** | **Rank** | **Patient1-Art/Control** | **Patient1-Porta/Control** | **Patient1-Hepa/Control** | **Patient2-Art/Control** | **Patient2-Porta/Control** | **Patient2-Hepa/Control** | **Peptide** |
|  | 4857 | **411.58** | **1231.73** | **1231.79** | **-0.06** | **0** | **15** | **1.9** | **1** | **---** | **---** | **---** | **---** | **---** | **---** | **R.VVHAAK.A** |
|  | 5578 | **664.34** | **1326.67** | **1326.76** | **-0.09** | **0** | **23** | **0.31** | **1** | **---** | **---** | **---** | **---** | **---** | **---** | **K.EATEAAK.C** 5582 |
|  | 6328 | **711.39** | **1420.77** | **1420.85** | **-0.09** | **0** | **34** | **0.03** | **1** | **0.777** | **0.694** | **0.465** | **1.125** | **1.347** | **0.804** | **K.FSVVYAK.C** |
|  | 6486 | **722.87** | **1443.72** | **1443.80** | **-0.09** | **0** | **17** | **1.2** | **1** | **---** | **---** | **---** | **---** | **---** | **---** | **K.CNLLAEK.Q** 6485 |
|  | 7837 | **815.87** | **1629.73** | **1629.69** | **0.04** | **0** | **18** | **0.53** | **1** | **---** | **---** | **---** | **---** | **---** | **---** | **K.CDSSPDSAEDVR.K** |
|  | 8577 | **576.02** | **1725.02** | **1725.06** | **-0.04** | **0** | **(6)** | **19** | **1** | **---** | **---** | **---** | **---** | **---** | **---** | **K.FSVVYAK.C** 8573 8575 8580 |
|  | 9293 | **602.32** | **1803.95** | **1804.03** | **-0.08** | **0** | **43** | **0.0034** | **1** | **1.144** | **0.953** | **0.737** | **1.021** | **1.362** | **0.899** | **K.HTLNQIDEVK.V** |
|  | 12252 | **753.37** | **2257.10** | **2257.13** | **-0.04** | **0** | **63** | **2.5e-005** | **1** | **1.217** | **1.009** | **0.673** | **0.747** | **1.314** | **0.741** | **K.EHAVEGDCDFQLLK.L** 12251 12255 12256 |
|  | 12499 | **1155.13** | **2308.25** | **2308.23** | **0.01** | **0** | **87** | **1.4e-007** | **1** | **0.419** | **0.511** | **0.369** | **0.887** | **1.067** | **0.683** | **R.TVVQPSVGAAAGPVVPPCPGR.I** 12494 12495 12496 12498 12500 12502 12503 |
|  | 15475 | **977.86** | **2930.56** | **2930.58** | **-0.02** | **1** | **55** | **0.00021** | **1** | **0.390** | **0.409** | **0.296** | **1.176** | **1.318** | **0.641** | **R.QLKEHAVEGDCDFQLLK.L** 15472 15473 15474 15478 |
|  | 16446 | **794.93** | **3175.69** | **3175.68** | **0.02** | **0** | **34** | **0.024** | **1** | **0.553** | **0.555** | **0.396** | **0.925** | **1.196** | **0.596** | **R.AQLVPLPPSTYVEFTVSGTDCVAK.E** 16415 16420 16423 16427 16445 16447 16458 16465 16469 16475 |
|  | 17705 | **1067.02** | **4264.03** | **4264.12** | **-0.09** | **0** | **4** | **9.6** | **1** | **---** | **---** | **---** | **---** | **---** | **---** | **R.QPNCDDPETEEAALVAIDYINQNLPWGYK.H** |

  


---

|  |  |
| --- | --- |
| **23.** | P06727    **Mass:** 54193    **Score:** 407    **Queries matched:** 41   **emPAI:** 0.82 |
|  | Apolipoprotein A-IV OS=Homo sapiens GN=APOA4 PE=1 SV=3 |

|  |  |  |  |  |  |
| --- | --- | --- | --- | --- | --- |
|  | **Quantitation:** | **Ratio** | **Weighted** | **N** | **SD(geo)** |
|  |  | Patient1-Art/Control | 1.004 | 14 | 1.114 |
|  |  | Patient1-Porta/Control | 0.919 | 14 | 1.107 |
|  |  | **Patient1-Hepa/Control** | **0.680** | **13** | **1.086** |
|  |  | **Patient2-Art/Control** | **0.758** | **14** | **1.074** |
|  |  | **Patient2-Porta/Control** | **0.873** | **14** | **1.067** |
|  |  | **Patient2-Hepa/Control** | **0.576** | **14** | **1.094** |

|  |  |  |  |  |  |  |  |  |  |  |  |  |  |  |  |  |
| --- | --- | --- | --- | --- | --- | --- | --- | --- | --- | --- | --- | --- | --- | --- | --- | --- |
|  | **Query** | **Observed** | **Mr(expt)** | **Mr(calc)** | **Delta** | **Miss** | **Score** | **Expect** | **Rank** | **Patient1-Art/Control** | **Patient1-Porta/Control** | **Patient1-Hepa/Control** | **Patient2-Art/Control** | **Patient2-Porta/Control** | **Patient2-Hepa/Control** | **Peptide** |
|  | 2925 | **496.29** | **990.57** | **990.58** | **-0.01** | **0** | **1** | **52** | **7** | **---** | **---** | **---** | **---** | **---** | **---** | **K.IGDNLR.E** |
|  | 5223 | **640.30** | **1278.58** | **1278.71** | **-0.13** | **0** | **26** | **0.099** | **1** | **---** | **---** | **---** | **---** | **---** | **---** | **R.ISASAEELR.Q** 5225 |
|  | 5339 | **644.37** | **1286.73** | **1286.75** | **-0.02** | **0** | **26** | **0.12** | **2** | **---** | **---** | **---** | **---** | **---** | **---** | **R.LAPLAEDVR.G** 5337 5338 |
|  | 6242 | **704.88** | **1407.74** | **1407.77** | **-0.02** | **0** | **30** | **0.066** | **1** | **---** | **---** | **---** | **---** | **---** | **---** | **R.LEPYADQLR.T** 6234 6237 |
|  | 7234 | **768.40** | **1534.79** | **1534.84** | **-0.05** | **0** | **23** | **0.29** | **1** | **---** | **---** | **---** | **---** | **---** | **---** | **K.ALVQQMEQLR.Q** |
|  | 7371 | **521.26** | **1560.75** | **1560.91** | **-0.16** | **0** | **11** | **3.7** | **1** | **---** | **---** | **---** | **---** | **---** | **---** | **K.EAVEHLQK.S** 7372 7373 7374 7375 |
|  | 7383 | **521.63** | **1561.86** | **1561.87** | **-0.01** | **1** | **36** | **0.018** | **1** | **0.671** | **0.684** | **0.575** | **0.665** | **0.815** | **0.500** | **K.IDQTVEELRR.S** |
|  | 7532 | **796.44** | **1590.87** | **1590.86** | **0.01** | **0** | **49** | **0.00083** | **1** | **0.727** | **0.812** | **0.580** | **0.616** | **0.722** | **0.400** | **R.TQVNTQAEQLR.R** 7527 7529 7535 |
|  | 7658 | **539.30** | **1614.87** | **1614.90** | **-0.03** | **0** | **76** | **1.9e-006** | **1** | **1.199** | **1.365** | **1.488** | **0.979** | **1.087** | **0.734** | **K.LVPFATELHER.L** 7659 7660 7663 7664 |
|  | 10689 | **512.80** | **2047.16** | **2047.20** | **-0.04** | **1** | **57** | **0.00013** | **1** | **0.912** | **0.983** | **0.652** | **0.673** | **0.701** | **0.442** | **K.KLVPFATELHER.L** |
|  | 11793 | **728.38** | **2182.11** | **2182.20** | **-0.09** | **0** | **2** | **37** | **1** | **---** | **---** | **---** | **---** | **---** | **---** | **K.LNHQLEGLTFQMK.K** |
|  | 12146 | **744.69** | **2231.05** | **2231.15** | **-0.10** | **0** | **62** | **1.9e-005** | **1** | **1.545** | **1.417** | **0.994** | **0.937** | **0.976** | **0.530** | **K.SLAELGGHLDQQVEEFR.R** 12147 12148 |
|  | 12185 | **748.41** | **2242.22** | **2242.24** | **-0.02** | **0** | **69** | **8.7e-006** | **1** | **1.282** | **0.940** | **0.824** | **0.620** | **0.643** | **0.428** | **K.SELTQQLNALFQDK.L** 12184 12186 12187 |
|  | 12192 | **749.43** | **2245.25** | **2245.29** | **-0.03** | **1** | **2** | **44** | **7** | **---** | **---** | **---** | **---** | **---** | **---** | **K.VNSFFSTFKEK.E** 12193 12195 12199 12200 |
|  | 12837 | **597.79** | **2387.13** | **2387.25** | **-0.12** | **1** | **41** | **0.0025** | **1** | **0.734** | **0.637** | **0.481** | **0.662** | **0.880** | **0.572** | **K.SLAELGGHLDQQVEEFRR.R** |
|  | 17427 | **965.23** | **3856.88** | **3856.89** | **-0.01** | **0** | **23** | **0.18** | **1** | **---** | **---** | **---** | **---** | **---** | **---** | **K.TLSLPELEQQQEQQQEQQQEQVQMLAPLES.-** |

  


---

|  |  |
| --- | --- |
| **24.** | P01042    **Mass:** 88605    **Score:** 351    **Queries matched:** 37   **emPAI:** 0.51 |
|  | Kininogen-1 OS=Homo sapiens GN=KNG1 PE=1 SV=2 |

|  |  |  |  |  |  |
| --- | --- | --- | --- | --- | --- |
|  | **Quantitation:** | **Ratio** | **Weighted** | **N** | **SD(geo)** |
|  |  | Patient1-Art/Control | 0.940 | 12 | 1.097 |
|  |  | **Patient1-Porta/Control** | **0.852** | **12** | **1.092** |
|  |  | **Patient1-Hepa/Control** | **0.604** | **12** | **1.070** |
|  |  | Patient2-Art/Control | 1.039 | 12 | NN |
|  |  | **Patient2-Porta/Control** | **1.186** | **11** | **1.032** |
|  |  | **Patient2-Hepa/Control** | **0.796** | **12** | **1.056** |

|  |  |  |  |  |  |  |  |  |  |  |  |  |  |  |  |  |
| --- | --- | --- | --- | --- | --- | --- | --- | --- | --- | --- | --- | --- | --- | --- | --- | --- |
|  | **Query** | **Observed** | **Mr(expt)** | **Mr(calc)** | **Delta** | **Miss** | **Score** | **Expect** | **Rank** | **Patient1-Art/Control** | **Patient1-Porta/Control** | **Patient1-Hepa/Control** | **Patient2-Art/Control** | **Patient2-Porta/Control** | **Patient2-Hepa/Control** | **Peptide** |
|  | 4170 | **572.27** | **1142.52** | **1142.54** | **-0.02** | **0** | **5** | **14** | **1** | **---** | **---** | **---** | **---** | **---** | **---** | **K.ICVGCPR.D** |
|  | 4647 | **598.85** | **1195.69** | **1195.74** | **-0.04** | **0** | **8** | **14** | **1** | **---** | **---** | **---** | **---** | **---** | **---** | **K.IDNVK.K** 4646 |
|  | 5433 | **654.38** | **1306.74** | **1306.77** | **-0.02** | **0** | **32** | **0.032** | **1** | **0.674** | **0.610** | **0.398** | **0.894** | **1.050** | **0.711** | **R.QVVAGLNFR.I** 5432 |
|  | 5618 | **667.86** | **1333.70** | **1333.73** | **-0.03** | **0** | **28** | **0.15** | **1** | **---** | **---** | **---** | **---** | **---** | **---** | **K.YFIDFVAR.E** 5617 5619 |
|  | 7899 | **546.98** | **1637.91** | **1637.94** | **-0.03** | **0** | **(28)** | **0.099** | **1** | **---** | **---** | **---** | **---** | **---** | **---** | **K.YFIDFVAR.E** 7896 7897 7898 7901 |
|  | 8590 | **576.71** | **1727.09** | **1727.11** | **-0.01** | **1** | **6** | **14** | **1** | **---** | **---** | **---** | **---** | **---** | **---** | **K.AVDAALKK.Y** |
|  | 8972 | **589.69** | **1766.03** | **1766.03** | **0.00** | **1** | **29** | **0.087** | **1** | **---** | **---** | **---** | **---** | **---** | **---** | **K.KYFIDFVAR.E** 8951 8957 8959 8969 8971 |
|  | 10365 | **661.00** | **1979.99** | **1980.03** | **-0.04** | **0** | **48** | **0.00083** | **1** | **1.150** | **0.964** | **0.665** | **1.077** | **1.279** | **0.857** | **K.ENFLFLTPDCK.S** 10362 10363 10364 10366 10367 10368 10369 |
|  | 10871 | **518.56** | **2070.22** | **2070.24** | **-0.01** | **1** | **(11)** | **4.9** | **1** | **---** | **---** | **---** | **---** | **---** | **---** | **K.KYFIDFVAR.E** |
|  | 14012 | **865.43** | **2593.28** | **2593.36** | **-0.08** | **0** | **37** | **0.0096** | **1** | **0.684** | **0.648** | **0.639** | **0.976** | **1.359** | **0.655** | **K.IYPTVNCQPLGMISLMK.R** 14016 |
|  | 14678 | **687.63** | **2746.48** | **2746.49** | **-0.00** | **0** | **67** | **1.2e-005** | **1** | **0.700** | **0.730** | **0.505** | **1.117** | **1.183** | **0.694** | **R.DIPTNSPELEETLTHTITK.L** 14674 14675 14676 14679 |
|  | 15975 | **757.39** | **3025.54** | **3025.66** | **-0.12** | **1** | **33** | **0.028** | **1** | **0.702** | **0.655** | **0.502** | **0.977** | **1.067** | **0.669** | **K.KIYPTVNCQPLGMISLMK.R** |

  


---

|  |  |
| --- | --- |
| **25.** | P04196    **Mass:** 67319    **Score:** 311    **Queries matched:** 18   **emPAI:** 0.31 |
|  | Histidine-rich glycoprotein OS=Homo sapiens GN=HRG PE=1 SV=1 |

|  |  |  |  |  |  |
| --- | --- | --- | --- | --- | --- |
|  | **Quantitation:** | **Ratio** | **Weighted** | **N** | **SD(geo)** |
|  |  | **Patient1-Art/Control** | **0.795** | **8** | **1.064** |
|  |  | **Patient1-Porta/Control** | **0.788** | **8** | **1.061** |
|  |  | **Patient1-Hepa/Control** | **0.388** | **8** | **1.115** |
|  |  | **Patient2-Art/Control** | **1.385** | **8** | **1.097** |
|  |  | **Patient2-Porta/Control** | **1.452** | **8** | **1.081** |
|  |  | **Patient2-Hepa/Control** | **0.688** | **8** | **1.047** |

|  |  |  |  |  |  |  |  |  |  |  |  |  |  |  |  |  |
| --- | --- | --- | --- | --- | --- | --- | --- | --- | --- | --- | --- | --- | --- | --- | --- | --- |
|  | **Query** | **Observed** | **Mr(expt)** | **Mr(calc)** | **Delta** | **Miss** | **Score** | **Expect** | **Rank** | **Patient1-Art/Control** | **Patient1-Porta/Control** | **Patient1-Hepa/Control** | **Patient2-Art/Control** | **Patient2-Porta/Control** | **Patient2-Hepa/Control** | **Peptide** |
|  | 6138 | **697.91** | **1393.80** | **1393.88** | **-0.08** | **0** | **18** | **1** | **1** | **---** | **---** | **---** | **---** | **---** | **---** | **K.ALDLINK.R** 6142 6144 |
|  | 6348 | **476.25** | **1425.73** | **1425.70** | **0.03** | **0** | **35** | **0.02** | **1** | **0.783** | **0.662** | **0.520** | **1.039** | **1.600** | **0.567** | **R.HPNVFGFCR.A** |
|  | 6357 | **714.89** | **1427.77** | **1427.81** | **-0.04** | **0** | **15** | **2.8** | **1** | **---** | **---** | **---** | **---** | **---** | **---** | **R.DGYLFQLLR.I** |
|  | 7299 | **517.66** | **1549.97** | **1549.98** | **-0.01** | **1** | **1** | **53** | **6** | **---** | **---** | **---** | **---** | **---** | **---** | **K.ALDLINKR.R** |
|  | 7501 | **528.98** | **1583.93** | **1583.91** | **0.02** | **1** | **15** | **2.3** | **1** | **---** | **---** | **---** | **---** | **---** | **---** | **R.RDGYLFQLLR.I** 7493 |
|  | 9890 | **628.67** | **1882.98** | **1883.06** | **-0.08** | **0** | **40** | **0.0061** | **1** | **0.986** | **0.866** | **0.554** | **1.149** | **1.176** | **0.735** | **R.RPSEIVIGQCK.V** 9893 |
|  | 10416 | **993.99** | **1985.97** | **1985.99** | **-0.02** | **0** | **99** | **6.5e-009** | **1** | **0.740** | **0.753** | **0.317** | **1.458** | **1.508** | **0.650** | **K.DSPVLIDFFEDTER.Y** 10414 10415 10417 10418 10419 |
|  | 13109 | **811.74** | **2432.21** | **2432.29** | **-0.08** | **0** | **73** | **2.6e-006** | **1** | **0.925** | **0.772** | **0.394** | **1.605** | **1.750** | **0.625** | **R.ADLFYDVEALDLESPK.N** 13110 |

  


---

|  |  |
| --- | --- |
| **26.** | P01871    **Mass:** 56824    **Score:** 285    **Queries matched:** 41   **emPAI:** 0.66 |
|  | Ig mu chain C region OS=Homo sapiens GN=IGHM PE=1 SV=3 |

|  |  |  |  |  |  |
| --- | --- | --- | --- | --- | --- |
|  | **Quantitation:** | **Ratio** | **Weighted** | **N** | **SD(geo)** |
|  |  | **Patient1-Art/Control** | **1.258** | **9** | **1.096** |
|  |  | Patient1-Porta/Control | 1.073 | 9 | 1.096 |
|  |  | **Patient1-Hepa/Control** | **0.814** | **9** | **1.069** |
|  |  | **Patient2-Art/Control** | **0.686** | **8** | **1.044** |
|  |  | **Patient2-Porta/Control** | **0.782** | **9** | **1.061** |
|  |  | **Patient2-Hepa/Control** | **0.516** | **9** | **1.055** |

|  |  |  |  |  |  |  |  |  |  |  |  |  |  |  |  |  |
| --- | --- | --- | --- | --- | --- | --- | --- | --- | --- | --- | --- | --- | --- | --- | --- | --- |
|  | **Query** | **Observed** | **Mr(expt)** | **Mr(calc)** | **Delta** | **Miss** | **Score** | **Expect** | **Rank** | **Patient1-Art/Control** | **Patient1-Porta/Control** | **Patient1-Hepa/Control** | **Patient2-Art/Control** | **Patient2-Porta/Control** | **Patient2-Hepa/Control** | **Peptide** |
|  | 3731 | **538.79** | **1075.57** | **1075.63** | **-0.06** | **0** | **17** | **1.3** | **1** | **---** | **---** | **---** | **---** | **---** | **---** | **R.EQLNLR.E** 3730 3735 |
|  | 3754 | **540.31** | **1078.61** | **1078.64** | **-0.04** | **0** | **23** | **0.25** | **1** | **---** | **---** | **---** | **---** | **---** | **---** | **R.GFPSVLR.G** 3743 3744 3745 3748 3749 3750 3758 |
|  | 4663 | **602.84** | **1203.67** | **1203.73** | **-0.06** | **0** | **20** | **0.49** | **1** | **---** | **---** | **---** | **---** | **---** | **---** | **K.VSVFVPPR.D** 4664 4665 |
|  | 4730 | **607.29** | **1212.57** | **1212.62** | **-0.05** | **0** | **3** | **25** | **1** | **---** | **---** | **---** | **---** | **---** | **---** | **R.DGFFGNPR.K** |
|  | 7274 | **771.91** | **1541.80** | **1541.80** | **0.00** | **0** | **31** | **0.049** | **1** | **0.942** | **0.791** | **0.716** | **0.451** | **0.656** | **0.440** | **K.LICQATGFSPR.Q** 7269 7271 7273 |
|  | 9925 | **629.38** | **1885.11** | **1885.11** | **-0.01** | **0** | **47** | **0.0014** | **1** | **0.858** | **0.936** | **0.689** | **0.595** | **0.803** | **0.627** | **K.YAATSQVLLPSK.D** 9919 |
|  | 10111 | **641.00** | **1919.98** | **1919.97** | **0.01** | **0** | **23** | **0.29** | **1** | **---** | **---** | **---** | **---** | **---** | **---** | **K.YVTSAPMPEPQAPGR.Y** |
|  | 10464 | **665.73** | **1994.17** | **1994.24** | **-0.07** | **0** | **42** | **0.0041** | **1** | **1.202** | **1.118** | **0.835** | **0.688** | **0.853** | **0.541** | **K.NVPLPVIAELPPK.V** |
|  | 10923 | **520.30** | **2077.19** | **2077.21** | **-0.02** | **0** | **19** | **0.83** | **1** | **---** | **---** | **---** | **---** | **---** | **---** | **K.GVALHRPDVYLLPPAR.E** |
|  | 12130 | **742.75** | **2225.22** | **2225.21** | **0.00** | **0** | **29** | **0.077** | **1** | **---** | **---** | **---** | **---** | **---** | **---** | **K.QVGSGVTTDQVQAEAK.E** |
|  | 12200 | 749.45 | 2245.33 | 2245.33 | -0.01 | 0 | 54 | 0.00029 | 1 | 1.367 | 1.178 | 0.818 | 0.715 | 0.813 | 0.555 | R.VFAIPPSFASIFLTK.S 12191 12192 12193 12194 12195 12197 12198 12199 12201 12202 12203 12205 12206 |
|  | 12526 | **579.32** | **2313.24** | **2313.23** | **0.00** | **0** | **21** | **0.51** | **1** | **---** | **---** | **---** | **---** | **---** | **---** | **R.FTCTVTHTDLPSPLK.Q** 12525 |

  


---

|  |  |
| --- | --- |
| **27.** | P08697    **Mass:** 60891    **Score:** 270    **Queries matched:** 14   **emPAI:** 0.13 |
|  | Alpha-2-antiplasmin OS=Homo sapiens GN=SERPINF2 PE=1 SV=3 |

|  |  |  |  |  |  |
| --- | --- | --- | --- | --- | --- |
|  | **Quantitation:** | **Ratio** | **Weighted** | **N** | **SD(geo)** |
|  |  | Patient1-Art/Control | --- | 0 | --- |
|  |  | Patient1-Porta/Control | --- | 0 | --- |
|  |  | Patient1-Hepa/Control | --- | 1 | --- |
|  |  | Patient2-Art/Control | --- | 1 | --- |
|  |  | Patient2-Porta/Control | --- | 2 | --- |
|  |  | Patient2-Hepa/Control | --- | 0 | --- |

|  |  |  |  |  |  |  |  |  |  |  |  |  |  |  |  |  |
| --- | --- | --- | --- | --- | --- | --- | --- | --- | --- | --- | --- | --- | --- | --- | --- | --- |
|  | **Query** | **Observed** | **Mr(expt)** | **Mr(calc)** | **Delta** | **Miss** | **Score** | **Expect** | **Rank** | **Patient1-Art/Control** | **Patient1-Porta/Control** | **Patient1-Hepa/Control** | **Patient2-Art/Control** | **Patient2-Porta/Control** | **Patient2-Hepa/Control** | **Peptide** |
|  | 13370 | **820.09** | **2457.26** | **2457.27** | **-0.01** | **0** | **23** | **0.31** | **1** | **---** | **---** | **---** | **---** | **---** | **---** | **K.LVPPMEEDYPQFGSPK.-** 13369 |
|  | 14795 | **921.50** | **2761.49** | **2761.48** | **0.01** | **0** | **(2)** | **40** | **2** | **---** | **---** | **---** | **---** | **---** | **---** | **K.LVPPMEEDYPQFGSPK.-** |
|  | 16014 | **1015.21** | **3042.61** | **3042.61** | **-0.01** | **0** | **65** | **1.8e-005** | **1** | **###** | **###** | **###** | **###** | **###** | **---** | **K.HQMDLVATLSQLGLQELFQAPDLR.G** 16010 16011 16012 16013 16015 16016 16017 16018 16019 16020 |

  


---

|  |  |
| --- | --- |
| **28.** | P04003    **Mass:** 79292    **Score:** 250    **Queries matched:** 19   **emPAI:** 0.20 |
|  | C4b-binding protein alpha chain OS=Homo sapiens GN=C4BPA PE=1 SV=2 |

|  |  |  |  |  |  |
| --- | --- | --- | --- | --- | --- |
|  | **Quantitation:** | **Ratio** | **Weighted** | **N** | **SD(geo)** |
|  |  | **Patient1-Art/Control** | **0.913** | **7** | **1.053** |
|  |  | **Patient1-Porta/Control** | **0.913** | **9** | **1.112** |
|  |  | **Patient1-Hepa/Control** | **0.799** | **9** | **1.123** |
|  |  | Patient2-Art/Control | 1.036 | 9 | 1.050 |
|  |  | Patient2-Porta/Control | 1.283 | 9 | NN |
|  |  | Patient2-Hepa/Control | 0.879 | 9 | NN |

|  |  |  |  |  |  |  |  |  |  |  |  |  |  |  |  |  |
| --- | --- | --- | --- | --- | --- | --- | --- | --- | --- | --- | --- | --- | --- | --- | --- | --- |
|  | **Query** | **Observed** | **Mr(expt)** | **Mr(calc)** | **Delta** | **Miss** | **Score** | **Expect** | **Rank** | **Patient1-Art/Control** | **Patient1-Porta/Control** | **Patient1-Hepa/Control** | **Patient2-Art/Control** | **Patient2-Porta/Control** | **Patient2-Hepa/Control** | **Peptide** |
|  | 1592 | **448.25** | **894.49** | **894.56** | **-0.07** | **0** | **4** | **15** | **1** | **---** | **---** | **---** | **---** | **---** | **---** | **K.GFVLR.G** 1597 |
|  | 7268 | **771.40** | **1540.80** | **1540.89** | **-0.10** | **1** | **16** | **1.5** | **1** | **---** | **---** | **---** | **---** | **---** | **---** | **R.QSTLDKEL.-** |
|  | 7797 | **814.43** | **1626.84** | **1626.92** | **-0.08** | **0** | **5** | **20** | **5** | **---** | **---** | **---** | **---** | **---** | **---** | **R.TWYPEVPK.C** |
|  | 9068 | **592.33** | **1773.98** | **1774.01** | **-0.04** | **0** | **83** | **3.4e-007** | **1** | **0.786** | **0.477** | **0.520** | **0.909** | **0.656** | **0.693** | **K.LSLEIEQLELQR.D** 9041 9042 9046 9047 9049 9053 9057 9058 9074 |
|  | 10759 | **1029.05** | **2056.08** | **2056.06** | **0.01** | **0** | **22** | **0.43** | **1** | **---** | **---** | **---** | **---** | **---** | **---** | **R.LMQCLPNPEDVK.M** 10756 10760 |
|  | 13647 | **837.04** | **2508.11** | **2508.16** | **-0.06** | **0** | **24** | **0.056** | **1** | **0.773** | **0.805** | **0.675** | **0.896** | **0.849** | **0.488** | **K.CEWETPEGCEQVLTGK.R** |
|  | 15225 | **719.58** | **2874.29** | **2874.35** | **-0.06** | **0** | **14** | **0.69** | **1** | **---** | **---** | **---** | **---** | **---** | **---** | **R.WTPYQGCEALCCPEPK.L** |

  


---

|  |  |
| --- | --- |
| **29.** | P02766    **Mass:** 18707    **Score:** 246    **Queries matched:** 23   **emPAI:** 0.45 |
|  | Transthyretin OS=Homo sapiens GN=TTR PE=1 SV=1 |

|  |  |  |  |  |  |
| --- | --- | --- | --- | --- | --- |
|  | **Quantitation:** | **Ratio** | **Weighted** | **N** | **SD(geo)** |
|  |  | **Patient1-Art/Control** | **0.867** | **8** | **1.171** |
|  |  | **Patient1-Porta/Control** | **0.774** | **8** | **1.174** |
|  |  | **Patient1-Hepa/Control** | **0.631** | **8** | **1.136** |
|  |  | Patient2-Art/Control | 0.840 | 8 | 1.168 |
|  |  | **Patient2-Porta/Control** | **1.094** | **8** | **1.095** |
|  |  | **Patient2-Hepa/Control** | **0.720** | **8** | **1.033** |

|  |  |  |  |  |  |  |  |  |  |  |  |  |  |  |  |  |
| --- | --- | --- | --- | --- | --- | --- | --- | --- | --- | --- | --- | --- | --- | --- | --- | --- |
|  | **Query** | **Observed** | **Mr(expt)** | **Mr(calc)** | **Delta** | **Miss** | **Score** | **Expect** | **Rank** | **Patient1-Art/Control** | **Patient1-Porta/Control** | **Patient1-Hepa/Control** | **Patient2-Art/Control** | **Patient2-Porta/Control** | **Patient2-Hepa/Control** | **Peptide** |
|  | 2572 | **488.78** | **975.54** | **975.60** | **-0.07** | **0** | **28** | **0.052** | **1** | **0.873** | **0.770** | **0.650** | **0.796** | **1.087** | **0.726** | **K.VLDAVR.G** 2570 2571 2577 2578 2579 2580 2581 |
|  | 5828 | **680.88** | **1359.74** | **1359.75** | **-0.02** | **0** | **13** | **2.6** | **1** | **---** | **---** | **---** | **---** | **---** | **---** | **K.CPLMVK.V** 5826 5827 |
|  | 8181 | **557.63** | **1669.87** | **1669.96** | **-0.09** | **0** | **66** | **1.6e-005** | **1** | **0.998** | **0.911** | **0.658** | **1.104** | **1.162** | **0.721** | **R.GSPAINVAVHVFR.K** 8182 8183 8184 8185 8186 8189 8191 8192 8198 |
|  | 10505 | **1002.02** | **2002.03** | **2002.03** | **-0.00** | **0** | **25** | **0.18** | **1** | **---** | **---** | **---** | **---** | **---** | **---** | **K.AADDTWEPFASGK.T** 10500 |

  


---

|  |  |
| --- | --- |
| **30.** | P04004    **Mass:** 61303    **Score:** 233    **Queries matched:** 22   **emPAI:** 0.19 |
|  | Vitronectin OS=Homo sapiens GN=VTN PE=1 SV=1 |

|  |  |  |  |  |  |
| --- | --- | --- | --- | --- | --- |
|  | **Quantitation:** | **Ratio** | **Weighted** | **N** | **SD(geo)** |
|  |  | Patient1-Art/Control | 0.976 | 4 | 1.202 |
|  |  | **Patient1-Porta/Control** | **0.863** | **4** | **1.142** |
|  |  | **Patient1-Hepa/Control** | **0.588** | **4** | **1.054** |
|  |  | Patient2-Art/Control | 1.049 | 4 | NN |
|  |  | Patient2-Porta/Control | 1.141 | 4 | 1.073 |
|  |  | **Patient2-Hepa/Control** | **0.623** | **4** | **1.029** |

|  |  |  |  |  |  |  |  |  |  |  |  |  |  |  |  |  |
| --- | --- | --- | --- | --- | --- | --- | --- | --- | --- | --- | --- | --- | --- | --- | --- | --- |
|  | **Query** | **Observed** | **Mr(expt)** | **Mr(calc)** | **Delta** | **Miss** | **Score** | **Expect** | **Rank** | **Patient1-Art/Control** | **Patient1-Porta/Control** | **Patient1-Hepa/Control** | **Patient2-Art/Control** | **Patient2-Porta/Control** | **Patient2-Hepa/Control** | **Peptide** |
|  | 4499 | **590.34** | **1178.67** | **1178.67** | **-0.00** | **0** | **18** | **0.73** | **1** | **---** | **---** | **---** | **---** | **---** | **---** | **R.QPQFISR.D** 4486 4487 4490 4492 4498 |
|  | 5232 | **640.34** | **1278.66** | **1278.78** | **-0.12** | **0** | **7** | **14** | **1** | **---** | **---** | **---** | **---** | **---** | **---** | **K.TYLFK.G** |
|  | 5461 | **656.38** | **1310.76** | **1310.78** | **-0.03** | **0** | **12** | **4.2** | **1** | **---** | **---** | **---** | **---** | **---** | **---** | **R.VYFFK.G** 5460 |
|  | 8581 | **863.92** | **1725.83** | **1725.85** | **-0.02** | **0** | **28** | **0.083** | **1** | **---** | **---** | **---** | **---** | **---** | **---** | **R.FEDGVLDPDYPR.N** |
|  | 10040 | **634.67** | **1900.98** | **1900.92** | **0.07** | **0** | **6** | **16** | **1** | **---** | **---** | **---** | **---** | **---** | **---** | **R.GQYCYELDEK.A** |
|  | 10138 | **481.52** | **1922.07** | **1922.08** | **-0.02** | **1** | **14** | **2.4** | **1** | **---** | **---** | **---** | **---** | **---** | **---** | **R.RVDTVDPPYPR.S** 10137 |
|  | 10224 | **975.99** | **1949.97** | **1950.02** | **-0.04** | **0** | **88** | **9e-008** | **1** | **1.080** | **0.935** | **0.610** | **1.119** | **1.207** | **0.614** | **R.DVWGIEGPIDAAFTR.I** 10226 10228 10229 10230 |
|  | 10281 | **981.98** | **1961.95** | **1961.98** | **-0.03** | **0** | **60** | **4.2e-005** | **1** | **0.667** | **0.606** | **0.517** | **0.890** | **0.964** | **0.654** | **R.SIAQYWLGCPAPGHL.-** |
|  | 11030 | **700.37** | **2098.08** | **2098.13** | **-0.05** | **1** | **7** | **12** | **1** | **---** | **---** | **---** | **---** | **---** | **---** | **R.CTEGFNVDKK.C** |
|  | 11079 | 704.71 | 2111.11 | 2111.24 | -0.13 | 0 | 0 | 61 | 5 | --- | --- | --- | --- | --- | --- | R.IYISGMAPRPSLAK.K |
|  | 12286 | **756.37** | **2266.09** | **2266.19** | **-0.09** | **0** | **(13)** | **2.2** | **1** | **---** | **---** | **---** | **---** | **---** | **---** | **R.SIAQYWLGCPAPGHL.-** |

  


---

|  |  |
| --- | --- |
| **31.** | P68871    **Mass:** 19731    **Score:** 222    **Queries matched:** 6   **emPAI:** 1.04 |
|  | Hemoglobin subunit beta OS=Homo sapiens GN=HBB PE=1 SV=2 |

|  |  |  |  |  |  |
| --- | --- | --- | --- | --- | --- |
|  | **Quantitation:** | **Ratio** | **Weighted** | **N** | **SD(geo)** |
|  |  | **Patient1-Art/Control** | **0.402** | **5** | **1.109** |
|  |  | **Patient1-Porta/Control** | **0.356** | **5** | **1.137** |
|  |  | **Patient1-Hepa/Control** | **0.328** | **5** | **1.070** |
|  |  | **Patient2-Art/Control** | **0.386** | **5** | **1.174** |
|  |  | **Patient2-Porta/Control** | **3.846** | **5** | **1.074** |
|  |  | **Patient2-Hepa/Control** | **0.638** | **5** | **1.088** |

|  |  |  |  |  |  |  |  |  |  |  |  |  |  |  |  |  |
| --- | --- | --- | --- | --- | --- | --- | --- | --- | --- | --- | --- | --- | --- | --- | --- | --- |
|  | **Query** | **Observed** | **Mr(expt)** | **Mr(calc)** | **Delta** | **Miss** | **Score** | **Expect** | **Rank** | **Patient1-Art/Control** | **Patient1-Porta/Control** | **Patient1-Hepa/Control** | **Patient2-Art/Control** | **Patient2-Porta/Control** | **Patient2-Hepa/Control** | **Peptide** |
|  | 7468 | **789.94** | **1577.86** | **1577.92** | **-0.06** | **0** | **22** | **0.45** | **1** | **---** | **---** | **---** | **---** | **---** | **---** | **R.LLVVYPWTQR.F** |
|  | 7676 | **809.89** | **1617.76** | **1617.86** | **-0.10** | **0** | **71** | **3.7e-006** | **1** | **0.322** | **0.259** | **0.290** | **0.291** | **4.006** | **0.578** | **K.VNVDEVGGEALGR.L** 7678 |
|  | 8863 | **586.70** | **1757.06** | **1757.08** | **-0.01** | **0** | **62** | **4.7e-005** | **1** | **0.472** | **0.459** | **0.394** | **0.592** | **3.919** | **0.772** | **K.VVAGVANALAHK.Y** 8862 |
|  | 14309 | **895.13** | **2682.36** | **2682.35** | **0.01** | **0** | **67** | **1.1e-005** | **1** | **0.442** | **0.369** | **0.318** | **0.490** | **2.960** | **0.615** | **R.FFESFGDLSTPDAVMGNPK.V** |

  


---

|  |  |
| --- | --- |
| **32.** | P01019    **Mass:** 60043    **Score:** 221    **Queries matched:** 13   **emPAI:** 0.43 |
|  | Angiotensinogen OS=Homo sapiens GN=AGT PE=1 SV=1 |

|  |  |  |  |  |  |
| --- | --- | --- | --- | --- | --- |
|  | **Quantitation:** | **Ratio** | **Weighted** | **N** | **SD(geo)** |
|  |  | **Patient1-Art/Control** | **0.707** | **5** | **1.199** |
|  |  | **Patient1-Porta/Control** | **0.664** | **6** | **1.136** |
|  |  | **Patient1-Hepa/Control** | **0.558** | **6** | **1.110** |
|  |  | **Patient2-Art/Control** | **0.792** | **6** | **1.438** |
|  |  | Patient2-Porta/Control | 1.014 | 6 | 1.099 |
|  |  | **Patient2-Hepa/Control** | **0.746** | **5** | **1.167** |

|  |  |  |  |  |  |  |  |  |  |  |  |  |  |  |  |  |
| --- | --- | --- | --- | --- | --- | --- | --- | --- | --- | --- | --- | --- | --- | --- | --- | --- |
|  | **Query** | **Observed** | **Mr(expt)** | **Mr(calc)** | **Delta** | **Miss** | **Score** | **Expect** | **Rank** | **Patient1-Art/Control** | **Patient1-Porta/Control** | **Patient1-Hepa/Control** | **Patient2-Art/Control** | **Patient2-Porta/Control** | **Patient2-Hepa/Control** | **Peptide** |
|  | 9601 | **917.49** | **1832.97** | **1832.96** | **0.01** | **0** | **33** | **0.037** | **1** | **0.655** | **0.604** | **0.692** | **0.889** | **1.182** | **0.661** | **R.AAMVGMLANFLGFR.I** 9596 9599 |
|  | 10604 | **676.39** | **2026.15** | **2026.22** | **-0.07** | **0** | **101** | **5e-009** | **1** | **1.079** | **0.869** | **0.595** | **1.034** | **1.194** | **1.016** | **K.VLSALQAVQGLLVAQGR.A** 10606 10607 10609 |
|  | 10666 | **1023.53** | **2045.05** | **2045.11** | **-0.06** | **0** | **33** | **0.031** | **1** | **0.729** | **0.699** | **0.560** | **0.818** | **1.020** | **0.775** | **R.SLDFTELDVAAEK.I** 10664 10667 10668 10671 |
|  | 11896 | **1101.66** | **2201.30** | **2201.29** | **0.01** | **0** | **28** | **0.1** | **1** | **---** | **---** | **---** | **---** | **---** | **---** | **K.QPFVQGLALYTPVVLPR.S** |

  


---

|  |  |
| --- | --- |
| **33.** | P19823    **Mass:** 126842   **Score:** 217    **Queries matched:** 28   **emPAI:** 0.19 |
|  | Inter-alpha-trypsin inhibitor heavy chain H2 OS=Homo sapiens GN=ITIH2 PE=1 SV=2 |

|  |  |  |  |  |  |
| --- | --- | --- | --- | --- | --- |
|  | **Quantitation:** | **Ratio** | **Weighted** | **N** | **SD(geo)** |
|  |  | **Patient1-Art/Control** | **1.096** | **9** | **1.292** |
|  |  | Patient1-Porta/Control | 0.946 | 9 | NN |
|  |  | **Patient1-Hepa/Control** | **0.759** | **9** | **1.274** |
|  |  | Patient2-Art/Control | 0.830 | 9 | NN |
|  |  | **Patient2-Porta/Control** | **1.275** | **8** | **1.076** |
|  |  | **Patient2-Hepa/Control** | **0.937** | **9** | **1.155** |

|  |  |  |  |  |  |  |  |  |  |  |  |  |  |  |  |  |
| --- | --- | --- | --- | --- | --- | --- | --- | --- | --- | --- | --- | --- | --- | --- | --- | --- |
|  | **Query** | **Observed** | **Mr(expt)** | **Mr(calc)** | **Delta** | **Miss** | **Score** | **Expect** | **Rank** | **Patient1-Art/Control** | **Patient1-Porta/Control** | **Patient1-Hepa/Control** | **Patient2-Art/Control** | **Patient2-Porta/Control** | **Patient2-Hepa/Control** | **Peptide** |
|  | 3893 | **548.82** | **1095.63** | **1095.63** | **-0.00** | **0** | **4** | **34** | **4** | **---** | **---** | **---** | **---** | **---** | **---** | **R.ALYAQAR.A** 3897 |
|  | 4209 | **575.31** | **1148.61** | **1148.67** | **-0.06** | **0** | **33** | **0.021** | **1** | **2.193** | **1.751** | **1.569** | **1.613** | **1.557** | **1.430** | **K.TILDDLR.A** 4213 4218 4219 4220 4223 |
|  | 6433 | **719.44** | **1436.86** | **1436.88** | **-0.02** | **0** | **37** | **0.015** | **1** | **0.770** | **0.622** | **0.581** | **0.881** | **1.202** | **0.831** | **R.SLAPTAAAK.R** |
|  | 9934 | **944.04** | **1886.06** | **1886.05** | **0.01** | **0** | **72** | **4.8e-006** | **1** | **0.461** | **0.600** | **0.433** | **0.892** | **1.042** | **0.623** | **K.IQPSGGTNINEALLR.A** 9931 9932 9933 9935 9936 9937 9938 |
|  | 11009 | **698.72** | **2093.14** | **2093.16** | **-0.02** | **0** | **16** | **1.7** | **1** | **---** | **---** | **---** | **---** | **---** | **---** | **K.HLEVDVWVIEPQGLR.F** 11007 11008 11011 |
|  | 12250 | **753.37** | **2257.08** | **2257.27** | **-0.19** | **0** | **3** | **19** | **2** | **---** | **---** | **---** | **---** | **---** | **---** | **R.ETAVDGELVVLYDVK.R** |
|  | 13152 | **814.14** | **2439.41** | **2439.45** | **-0.03** | **1** | **70** | **5.6e-006** | **1** | **0.707** | **0.576** | **0.431** | **0.881** | **0.981** | **0.584** | **R.KLWAYLTINQLLAER.S** |
|  | 14531 | **910.85** | **2729.53** | **2729.53** | **0.00** | **0** | **68** | **1.1e-005** | **1** | **0.527** | **0.751** | **0.782** | **0.980** | **0.735** | **0.667** | **K.VVNNSPQPQNVVFDVQIPK.G** |
|  | 15061 | **713.14** | **2848.53** | **2848.54** | **-0.01** | **0** | **32** | **0.037** | **1** | **0.764** | **0.715** | **0.483** | **0.331** | **1.248** | **0.770** | **R.FLHVPDTFEGHFDGVPVISK.G** 15059 15060 |
|  | 17570 | 809.25 | 4041.21 | 4041.22 | -0.00 | 1 | 2 | 28 | 3 | --- | --- | --- | --- | --- | --- | R.MATTMIQSKVVNNSPQPQNVVFDVQIPK.G |

  


---

|  |  |
| --- | --- |
| **34.** | P02760    **Mass:** 45490    **Score:** 214    **Queries matched:** 15   **emPAI:** 0.27 |
|  | Protein AMBP OS=Homo sapiens GN=AMBP PE=1 SV=1 |

|  |  |  |  |  |  |
| --- | --- | --- | --- | --- | --- |
|  | **Quantitation:** | **Ratio** | **Weighted** | **N** | **SD(geo)** |
|  |  | **Patient1-Art/Control** | **0.913** | **8** | **1.119** |
|  |  | **Patient1-Porta/Control** | **0.766** | **8** | **1.063** |
|  |  | **Patient1-Hepa/Control** | **0.584** | **8** | **1.074** |
|  |  | **Patient2-Art/Control** | **0.799** | **8** | **1.122** |
|  |  | **Patient2-Porta/Control** | **1.156** | **8** | **1.047** |
|  |  | **Patient2-Hepa/Control** | **0.830** | **8** | **1.061** |

|  |  |  |  |  |  |  |  |  |  |  |  |  |  |  |  |  |
| --- | --- | --- | --- | --- | --- | --- | --- | --- | --- | --- | --- | --- | --- | --- | --- | --- |
|  | **Query** | **Observed** | **Mr(expt)** | **Mr(calc)** | **Delta** | **Miss** | **Score** | **Expect** | **Rank** | **Patient1-Art/Control** | **Patient1-Porta/Control** | **Patient1-Hepa/Control** | **Patient2-Art/Control** | **Patient2-Porta/Control** | **Patient2-Hepa/Control** | **Peptide** |
|  | 7037 | 753.92 | 1505.82 | 1505.84 | -0.01 | 0 | 38 | 0.0099 | 1 | 1.113 | 0.853 | 0.661 | 0.935 | 1.210 | 0.921 | R.TVAACNLPIVR.G 7031 7032 7033 7034 7035 |
|  | 10493 | **1001.42** | **2000.83** | **2000.91** | **-0.09** | **0** | **62** | **5.8e-006** | **1** | **0.573** | **0.675** | **0.428** | **0.565** | **1.110** | **0.831** | **R.EYCGVPGDGDEELLR.F** 10494 |
|  | 10575 | **673.07** | **2016.18** | **2016.17** | **0.01** | **0** | **52** | **0.00045** | **1** | **0.769** | **0.611** | **0.552** | **0.787** | **0.916** | **0.774** | **R.AFIQLWAFDAVK.G** 10573 10576 |
|  | 12468 | **577.31** | **2305.21** | **2305.12** | **0.09** | **0** | **(16)** | **1.4** | **1** | **---** | **---** | **---** | **---** | **---** | **---** | **R.EYCGVPGDGDEELLR.F** 12469 |
|  | 12649 | 787.05 | 2358.14 | 2358.23 | -0.09 | 1 | 2 | 28 | 3 | --- | --- | --- | --- | --- | --- | R.KGVCEETSGAYEK.T 12650 |

  


---

|  |  |
| --- | --- |
| **35.** | P02649    **Mass:** 40483    **Score:** 211    **Queries matched:** 25   **emPAI:** 0.19 |
|  | Apolipoprotein E OS=Homo sapiens GN=APOE PE=1 SV=1 |

|  |  |  |  |  |  |
| --- | --- | --- | --- | --- | --- |
|  | **Quantitation:** | **Ratio** | **Weighted** | **N** | **SD(geo)** |
|  |  | Patient1-Art/Control | 1.125 | 4 | 1.261 |
|  |  | Patient1-Porta/Control | 1.158 | 4 | 1.621 |
|  |  | Patient1-Hepa/Control | 0.748 | 4 | 1.293 |
|  |  | Patient2-Art/Control | 0.814 | 5 | 1.769 |
|  |  | **Patient2-Porta/Control** | **0.932** | **5** | **1.142** |
|  |  | **Patient2-Hepa/Control** | **0.525** | **3** | **1.053** |

|  |  |  |  |  |  |  |  |  |  |  |  |  |  |  |  |  |
| --- | --- | --- | --- | --- | --- | --- | --- | --- | --- | --- | --- | --- | --- | --- | --- | --- |
|  | **Query** | **Observed** | **Mr(expt)** | **Mr(calc)** | **Delta** | **Miss** | **Score** | **Expect** | **Rank** | **Patient1-Art/Control** | **Patient1-Porta/Control** | **Patient1-Hepa/Control** | **Patient2-Art/Control** | **Patient2-Porta/Control** | **Patient2-Hepa/Control** | **Peptide** |
|  | 2019 | **460.79** | **919.57** | **919.58** | **-0.00** | **0** | **12** | **3.5** | **1** | **---** | **---** | **---** | **---** | **---** | **---** | **R.GLSAIR.E** 2011 2012 2013 2014 2015 2018 |
|  | 2736 | **491.78** | **981.55** | **981.59** | **-0.04** | **0** | **0** | **1.8e+002** | **4** | **---** | **---** | **---** | **---** | **---** | **---** | **R.LVQYR.G** |
|  | 4921 | **626.87** | **1251.72** | **1251.72** | **-0.00** | **0** | **23** | **0.37** | **1** | **---** | **---** | **---** | **---** | **---** | **---** | **R.LAVYQAGAR.E** 4917 4918 4919 4920 |
|  | 10312 | **984.50** | **1966.99** | **1966.99** | **-0.00** | **0** | **103** | **2.9e-009** | **1** | **1.224** | **1.225** | **0.802** | **0.844** | **0.983** | **0.533** | **R.GEVQAMLGQSTEELR.V** 10311 10313 10315 10316 10317 10319 |
|  | 12357 | **574.32** | **2293.27** | **2293.29** | **-0.02** | **2** | **5** | **22** | **2** | **---** | **---** | **---** | **---** | **---** | **---** | **R.DRLDEVKEQVAEVR.A** |
|  | 15987 | **1012.20** | **3033.57** | **3033.59** | **-0.03** | **0** | **43** | **0.0032** | **1** | **###** | **###** | **###** | **###** | **---** | **---** | **R.WVQTLSEQVQEELLSSQVTQELR.A** 15985 15986 15990 |

  


---

|  |  |
| --- | --- |
| **36.** | P01834    **Mass:** 14477    **Score:** 203    **Queries matched:** 7   **emPAI:** 0.27 |
|  | Ig kappa chain C region OS=Homo sapiens GN=IGKC PE=1 SV=1 |

|  |  |  |  |  |  |
| --- | --- | --- | --- | --- | --- |
|  | **Quantitation:** | **Ratio** | **Weighted** | **N** | **SD(geo)** |
|  |  | Patient1-Art/Control | 1.335 | 6 | 1.212 |
|  |  | Patient1-Porta/Control | 1.258 | 6 | 1.160 |
|  |  | **Patient1-Hepa/Control** | **0.774** | **6** | **1.141** |
|  |  | **Patient2-Art/Control** | **0.879** | **6** | **1.241** |
|  |  | Patient2-Porta/Control | 1.108 | 6 | 1.083 |
|  |  | **Patient2-Hepa/Control** | **0.680** | **6** | **1.122** |

|  |  |  |  |  |  |  |  |  |  |  |  |  |  |  |  |  |
| --- | --- | --- | --- | --- | --- | --- | --- | --- | --- | --- | --- | --- | --- | --- | --- | --- |
|  | **Query** | **Observed** | **Mr(expt)** | **Mr(calc)** | **Delta** | **Miss** | **Score** | **Expect** | **Rank** | **Patient1-Art/Control** | **Patient1-Porta/Control** | **Patient1-Hepa/Control** | **Patient2-Art/Control** | **Patient2-Porta/Control** | **Patient2-Hepa/Control** | **Peptide** |
|  | 13888 | **852.12** | **2553.34** | **2553.43** | **-0.09** | **0** | **57** | **0.00012** | **1** | **1.204** | **1.199** | **0.767** | **0.822** | **1.003** | **0.755** | **-.TVAAPSVFIFPPSDEQLK.S** 13889 13893 13894 13895 13896 13898 |

  


---

|  |  |
| --- | --- |
| **37.** | P02656    **Mass:** 12975    **Score:** 199    **Queries matched:** 8   **emPAI:** 0.70 |
|  | Apolipoprotein C-III OS=Homo sapiens GN=APOC3 PE=1 SV=1 |

|  |  |  |  |  |  |
| --- | --- | --- | --- | --- | --- |
|  | **Quantitation:** | **Ratio** | **Weighted** | **N** | **SD(geo)** |
|  |  | Patient1-Art/Control | 1.214 | 5 | 1.227 |
|  |  | Patient1-Porta/Control | 1.089 | 5 | 1.148 |
|  |  | Patient1-Hepa/Control | 0.903 | 5 | NN |
|  |  | Patient2-Art/Control | 1.283 | 5 | 1.125 |
|  |  | **Patient2-Porta/Control** | **1.352** | **5** | **1.101** |
|  |  | Patient2-Hepa/Control | 1.075 | 5 | NN |

|  |  |  |  |  |  |  |  |  |  |  |  |  |  |  |  |  |
| --- | --- | --- | --- | --- | --- | --- | --- | --- | --- | --- | --- | --- | --- | --- | --- | --- |
|  | **Query** | **Observed** | **Mr(expt)** | **Mr(calc)** | **Delta** | **Miss** | **Score** | **Expect** | **Rank** | **Patient1-Art/Control** | **Patient1-Porta/Control** | **Patient1-Hepa/Control** | **Patient2-Art/Control** | **Patient2-Porta/Control** | **Patient2-Hepa/Control** | **Peptide** |
|  | 10591 | **1011.04** | **2020.06** | **2020.05** | **0.01** | **0** | **71** | **5.4e-006** | **1** | **0.537** | **0.675** | **0.400** | **0.860** | **0.960** | **0.943** | **K.DALSSVQESQVAQQAR.G** 10588 10589 10590 10592 10593 10594 10595 |

  


---

|  |  |
| --- | --- |
| **38.** | P00734    **Mass:** 80314    **Score:** 179    **Queries matched:** 28   **emPAI:** 0.14 |
|  | Prothrombin OS=Homo sapiens GN=F2 PE=1 SV=2 |

|  |  |  |  |  |  |
| --- | --- | --- | --- | --- | --- |
|  | **Quantitation:** | **Ratio** | **Weighted** | **N** | **SD(geo)** |
|  |  | **Patient1-Art/Control** | **0.737** | **5** | **1.034** |
|  |  | **Patient1-Porta/Control** | **0.849** | **6** | **1.098** |
|  |  | **Patient1-Hepa/Control** | **0.570** | **6** | **1.078** |
|  |  | Patient2-Art/Control | 1.010 | 6 | 1.046 |
|  |  | **Patient2-Porta/Control** | **1.199** | **6** | **1.043** |
|  |  | **Patient2-Hepa/Control** | **0.733** | **6** | **1.040** |

|  |  |  |  |  |  |  |  |  |  |  |  |  |  |  |  |  |
| --- | --- | --- | --- | --- | --- | --- | --- | --- | --- | --- | --- | --- | --- | --- | --- | --- |
|  | **Query** | **Observed** | **Mr(expt)** | **Mr(calc)** | **Delta** | **Miss** | **Score** | **Expect** | **Rank** | **Patient1-Art/Control** | **Patient1-Porta/Control** | **Patient1-Hepa/Control** | **Patient2-Art/Control** | **Patient2-Porta/Control** | **Patient2-Hepa/Control** | **Peptide** |
|  | 482 | **425.25** | **848.49** | **848.50** | **-0.01** | **0** | **5** | **22** | **4** | **---** | **---** | **---** | **---** | **---** | **---** | **R.AIEGR.T** |
|  | 6468 | **721.33** | **1440.65** | **1440.72** | **-0.07** | **0** | **16** | **0.98** | **1** | **---** | **---** | **---** | **---** | **---** | **---** | **R.SGIECQLWR.S** |
|  | 6913 | **749.90** | **1497.79** | **1497.80** | **-0.00** | **0** | **46** | **0.0016** | **1** | **0.725** | **0.764** | **0.513** | **1.084** | **1.267** | **0.755** | **R.ELLESYIDGR.I** 6908 6909 6910 6911 |
|  | 7119 | 762.88 | 1523.75 | 1523.83 | -0.08 | 0 | 2 | 43 | 10 | --- | --- | --- | --- | --- | --- | K.NFTENDLLVR.I |
|  | 9715 | 922.54 | 1843.07 | 1843.17 | -0.11 | 1 | 17 | 1.6 | 2 | --- | --- | --- | --- | --- | --- | R.DIALMKLK.K 9696 9706 9711 9712 9713 9716 9717 9718 9719 |
|  | 9826 | **933.46** | **1864.91** | **1864.93** | **-0.01** | **0** | **65** | **1.4e-005** | **1** | **0.677** | **0.693** | **0.526** | **0.869** | **1.092** | **0.680** | **R.TATSEYQTFFNPR.T** 9825 9827 |
|  | 14010 | **648.83** | **2591.31** | **2591.42** | **-0.11** | **0** | **44** | **0.0022** | **1** | **0.815** | **0.777** | **0.447** | **1.006** | **1.031** | **0.628** | **R.LAVTTHGLPCLAWASAQAK.A** 14011 |
|  | 14527 | **910.77** | **2729.28** | **2729.27** | **0.01** | **1** | **7** | **5.8** | **1** | **---** | **---** | **---** | **---** | **---** | **---** | **R.RQECSIPVCGQDQVTVAMTPR.S** |
|  | 15019 | **943.89** | **2828.65** | **2828.62** | **0.03** | **0** | **8** | **9.2** | **1** | **---** | **---** | **---** | **---** | **---** | **---** | **K.GQPSVLQVVNLPIVERPVCK.D** 15015 15016 15017 |

  


---

|  |  |
| --- | --- |
| **39.** | P19827    **Mass:** 116295   **Score:** 141    **Queries matched:** 13   **emPAI:** 0.10 |
|  | Inter-alpha-trypsin inhibitor heavy chain H1 OS=Homo sapiens GN=ITIH1 PE=1 SV=3 |

|  |  |  |  |  |  |
| --- | --- | --- | --- | --- | --- |
|  | **Quantitation:** | **Ratio** | **Weighted** | **N** | **SD(geo)** |
|  |  | Patient1-Art/Control | 0.816 | 3 | 1.325 |
|  |  | **Patient1-Porta/Control** | **0.575** | **3** | **1.158** |
|  |  | Patient1-Hepa/Control | 0.648 | 3 | NN |
|  |  | Patient2-Art/Control | 0.817 | 3 | 1.210 |
|  |  | Patient2-Porta/Control | 0.816 | 3 | 1.201 |
|  |  | **Patient2-Hepa/Control** | **0.691** | **3** | **1.135** |

|  |  |  |  |  |  |  |  |  |  |  |  |  |  |  |  |  |
| --- | --- | --- | --- | --- | --- | --- | --- | --- | --- | --- | --- | --- | --- | --- | --- | --- |
|  | **Query** | **Observed** | **Mr(expt)** | **Mr(calc)** | **Delta** | **Miss** | **Score** | **Expect** | **Rank** | **Patient1-Art/Control** | **Patient1-Porta/Control** | **Patient1-Hepa/Control** | **Patient2-Art/Control** | **Patient2-Porta/Control** | **Patient2-Hepa/Control** | **Peptide** |
|  | 4582 | 591.36 | 1180.72 | 1180.76 | -0.05 | 0 | 12 | 4 | 1 | --- | --- | --- | --- | --- | --- | K.EALLK.I 4573 4576 |
|  | 4646 | 598.85 | 1195.69 | 1195.77 | -0.09 | 0 | 1 | 79 | 2 | --- | --- | --- | --- | --- | --- | R.SQILK.N |
|  | 6638 | **731.40** | **1460.78** | **1460.83** | **-0.05** | **0** | **1** | **37** | **1** | **---** | **---** | **---** | **---** | **---** | **---** | **K.AAISGENAGLVR.A** |
|  | 8348 | **849.48** | **1696.95** | **1697.00** | **-0.05** | **0** | **6** | **17** | **1** | **---** | **---** | **---** | **---** | **---** | **---** | **K.LDAQASFLPK.E** |
|  | 8973 | **884.98** | **1767.95** | **1768.02** | **-0.08** | **0** | **29** | **0.086** | **1** | **---** | **---** | **---** | **---** | **---** | **---** | **R.EVAFDLEIPK.T** |
|  | 11546 | **724.11** | **2169.32** | **2169.30** | **0.02** | **0** | **8** | **9.5** | **2** | **---** | **---** | **---** | **---** | **---** | **---** | **R.LWAYLTIQELLAK.R** |
|  | 12482 | **770.07** | **2307.19** | **2307.21** | **-0.03** | **0** | **77** | **1.1e-006** | **1** | **0.908** | **0.627** | **0.587** | **0.866** | **0.739** | **0.584** | **K.GSLVQASEANLQAAQDFVR.G** 12481 |
|  | 13470 | **826.41** | **2476.21** | **2476.26** | **-0.05** | **0** | **56** | **0.00011** | **1** | **0.434** | **0.618** | **0.719** | **0.546** | **0.656** | **0.877** | **K.ILGDMQPGDYFDLVLFGTR.V** 13503 13504 |

  


---

|  |  |
| --- | --- |
| **40.** | P27169    **Mass:** 46250    **Score:** 128    **Queries matched:** 19   **emPAI:** 0.26 |
|  | Serum paraoxonase/arylesterase 1 OS=Homo sapiens GN=PON1 PE=1 SV=2 |

|  |  |  |  |  |  |
| --- | --- | --- | --- | --- | --- |
|  | **Quantitation:** | **Ratio** | **Weighted** | **N** | **SD(geo)** |
|  |  | Patient1-Art/Control | 0.691 | 5 | 1.336 |
|  |  | Patient1-Porta/Control | 0.762 | 5 | 1.568 |
|  |  | Patient1-Hepa/Control | 0.523 | 4 | NN |
|  |  | Patient2-Art/Control | 1.052 | 5 | 1.347 |
|  |  | Patient2-Porta/Control | 1.206 | 5 | 1.225 |
|  |  | Patient2-Hepa/Control | 0.687 | 5 | 1.951 |

|  |  |  |  |  |  |  |  |  |  |  |  |  |  |  |  |  |
| --- | --- | --- | --- | --- | --- | --- | --- | --- | --- | --- | --- | --- | --- | --- | --- | --- |
|  | **Query** | **Observed** | **Mr(expt)** | **Mr(calc)** | **Delta** | **Miss** | **Score** | **Expect** | **Rank** | **Patient1-Art/Control** | **Patient1-Porta/Control** | **Patient1-Hepa/Control** | **Patient2-Art/Control** | **Patient2-Porta/Control** | **Patient2-Hepa/Control** | **Peptide** |
|  | 1531 | **445.76** | **889.52** | **889.57** | **-0.05** | **0** | **4** | **12** | **2** | **---** | **---** | **---** | **---** | **---** | **---** | **R.LNALR.E** |
|  | 3567 | **531.27** | **1060.53** | **1060.52** | **0.00** | **0** | **17** | **0.73** | **1** | **---** | **---** | **---** | **---** | **---** | **---** | **K.ALYCEL.-** |
|  | 7870 | **546.00** | **1634.98** | **1635.03** | **-0.05** | **0** | **44** | **0.0028** | **1** | **0.916** | **0.771** | **0.518** | **1.241** | **1.395** | **0.740** | **K.LLIGTVFHK.A** 7871 7875 7876 |
|  | 11810 | **1094.54** | **2187.06** | **2187.12** | **-0.05** | **0** | **61** | **3.9e-005** | **1** | **0.497** | **0.717** | **0.516** | **0.904** | **1.048** | **0.614** | **K.IFFYDSENPPASEVLR.I** |
|  | 12155 | **746.05** | **2235.12** | **2235.22** | **-0.10** | **0** | **3** | **26** | **1** | **---** | **---** | **---** | **---** | **---** | **---** | **R.EVQPVELPNCNLVK.G** 12156 |
|  | 15971 | **1008.90** | **3023.68** | **3023.66** | **0.02** | **0** | **40** | **0.0059** | **1** | **1.518** | **3.533** | **-0.235** | **0.436** | **1.932** | **3.050** | **K.ILLMDLNEEDPTVLELGITGSK.F** 15964 15965 15966 15967 15968 15969 15970 15972 15974 |

  


---

|  |  |
| --- | --- |
| **41.** | P51884    **Mass:** 46590    **Score:** 124    **Queries matched:** 10   **emPAI:** 0.17 |
|  | Lumican OS=Homo sapiens GN=LUM PE=1 SV=2 |

|  |  |  |  |  |  |
| --- | --- | --- | --- | --- | --- |
|  | **Quantitation:** | **Ratio** | **Weighted** | **N** | **SD(geo)** |
|  |  | **Patient1-Art/Control** | **0.771** | **4** | **1.113** |
|  |  | Patient1-Porta/Control | 0.772 | 4 | NN |
|  |  | Patient1-Hepa/Control | 0.476 | 4 | NN |
|  |  | Patient2-Art/Control | 0.934 | 4 | 1.225 |
|  |  | **Patient2-Porta/Control** | **1.193** | **4** | **1.101** |
|  |  | **Patient2-Hepa/Control** | **0.636** | **4** | **1.156** |

|  |  |  |  |  |  |  |  |  |  |  |  |  |  |  |  |  |
| --- | --- | --- | --- | --- | --- | --- | --- | --- | --- | --- | --- | --- | --- | --- | --- | --- |
|  | **Query** | **Observed** | **Mr(expt)** | **Mr(calc)** | **Delta** | **Miss** | **Score** | **Expect** | **Rank** | **Patient1-Art/Control** | **Patient1-Porta/Control** | **Patient1-Hepa/Control** | **Patient2-Art/Control** | **Patient2-Porta/Control** | **Patient2-Hepa/Control** | **Peptide** |
|  | 5585 | **664.86** | **1327.70** | **1327.76** | **-0.06** | **0** | **17** | **1.1** | **1** | **---** | **---** | **---** | **---** | **---** | **---** | **R.FNALQYLR.L** |
|  | 7979 | **550.30** | **1647.87** | **1647.98** | **-0.12** | **0** | **16** | **1.5** | **1** | **---** | **---** | **---** | **---** | **---** | **---** | **K.SVPMVPPGIK.Y** 7982 |
|  | 10338 | **987.04** | **1972.07** | **1972.06** | **0.02** | **0** | **35** | **0.023** | **1** | **0.723** | **0.678** | **0.471** | **0.862** | **1.162** | **0.617** | **K.SLEYLDLSFNQIAR.L** |
|  | 10978 | **697.75** | **2090.23** | **2090.25** | **-0.02** | **1** | **2** | **38** | **1** | **---** | **---** | **---** | **---** | **---** | **---** | **R.LKEDAVSAAFK.G** |
|  | 13940 | **855.84** | **2564.51** | **2564.50** | **0.01** | **0** | **66** | **1.3e-005** | **1** | **0.968** | **1.094** | **0.458** | **1.205** | **1.411** | **0.662** | **R.LPSGLPVSLLTLYLDNNK.I** 13936 13937 13938 13939 |

  


---

|  |  |
| --- | --- |
| **42.** | P25311    **Mass:** 40423    **Score:** 117    **Queries matched:** 6   **emPAI:** 0.19 |
|  | Zinc-alpha-2-glycoprotein OS=Homo sapiens GN=AZGP1 PE=1 SV=1 |

|  |  |  |  |  |  |
| --- | --- | --- | --- | --- | --- |
|  | **Quantitation:** | **Ratio** | **Weighted** | **N** | **SD(geo)** |
|  |  | Patient1-Art/Control | 0.888 | 3 | 1.296 |
|  |  | Patient1-Porta/Control | 0.752 | 3 | 1.345 |
|  |  | Patient1-Hepa/Control | 0.582 | 3 | NN |
|  |  | Patient2-Art/Control | 0.797 | 3 | 1.212 |
|  |  | Patient2-Porta/Control | 0.972 | 3 | 1.158 |
|  |  | **Patient2-Hepa/Control** | **0.744** | **3** | **1.082** |

|  |  |  |  |  |  |  |  |  |  |  |  |  |  |  |  |  |
| --- | --- | --- | --- | --- | --- | --- | --- | --- | --- | --- | --- | --- | --- | --- | --- | --- |
|  | **Query** | **Observed** | **Mr(expt)** | **Mr(calc)** | **Delta** | **Miss** | **Score** | **Expect** | **Rank** | **Patient1-Art/Control** | **Patient1-Porta/Control** | **Patient1-Hepa/Control** | **Patient2-Art/Control** | **Patient2-Porta/Control** | **Patient2-Hepa/Control** | **Peptide** |
|  | 12844 | **797.80** | **2390.37** | **2390.35** | **0.02** | **0** | **50** | **0.0006** | **1** | **1.095** | **1.151** | **1.015** | **0.794** | **1.321** | **0.867** | **K.EIPAWVPFDPAAQITK.Q** 12841 |
|  | 14411 | **903.13** | **2706.37** | **2706.41** | **-0.04** | **0** | **70** | **5.6e-006** | **1** | **0.544** | **0.503** | **0.513** | **1.196** | **0.962** | **0.709** | **K.HVEDVPAFQALGSLNDLQFFR.Y** 14413 14415 14417 |

  


---

|  |  |
| --- | --- |
| **43.** | P01842    **Mass:** 14105    **Score:** 95     **Queries matched:** 4   **emPAI:** 0.63 |
|  | Ig lambda chain C regions OS=Homo sapiens GN=IGLC1 PE=1 SV=1 |

|  |  |  |  |  |  |
| --- | --- | --- | --- | --- | --- |
|  | **Quantitation:** | **Ratio** | **Weighted** | **N** | **SD(geo)** |
|  |  | Patient1-Art/Control | 1.028 | 3 | 1.095 |
|  |  | Patient1-Porta/Control | 1.179 | 3 | 1.103 |
|  |  | **Patient1-Hepa/Control** | **0.792** | **3** | **1.101** |
|  |  | Patient2-Art/Control | 0.776 | 3 | 1.138 |
|  |  | Patient2-Porta/Control | 1.200 | 3 | 1.077 |
|  |  | Patient2-Hepa/Control | 0.804 | 3 | 1.122 |

|  |  |  |  |  |  |  |  |  |  |  |  |  |  |  |  |  |
| --- | --- | --- | --- | --- | --- | --- | --- | --- | --- | --- | --- | --- | --- | --- | --- | --- |
|  | **Query** | **Observed** | **Mr(expt)** | **Mr(calc)** | **Delta** | **Miss** | **Score** | **Expect** | **Rank** | **Patient1-Art/Control** | **Patient1-Porta/Control** | **Patient1-Hepa/Control** | **Patient2-Art/Control** | **Patient2-Porta/Control** | **Patient2-Hepa/Control** | **Peptide** |
|  | 4343 | **579.27** | **1156.53** | **1156.54** | **-0.02** | **0** | **6** | **12** | **1** | **---** | **---** | **---** | **---** | **---** | **---** | **K.TVAPTECS.-** |
|  | 12626 | **784.75** | **2351.23** | **2351.26** | **-0.03** | **0** | **44** | **0.0025** | **1** | **1.195** | **1.354** | **0.920** | **0.953** | **1.343** | **0.869** | **K.YAASSYLSLTPEQWK.S** |
|  | 14017 | **865.48** | **2593.42** | **2593.42** | **-0.00** | **0** | **48** | **0.001** | **1** | **0.883** | **0.972** | **0.664** | **0.708** | **1.043** | **0.633** | **K.AAPSVTLFPPSSEELQANK.A** 14015 |

  


---

|  |  |
| --- | --- |
| **44.** | P02735    **Mass:** 15395    **Score:** 84     **Queries matched:** 1   **emPAI:** 0.25 |
|  | Serum amyloid A protein OS=Homo sapiens GN=SAA1 PE=1 SV=2 |

|  |  |  |  |  |  |
| --- | --- | --- | --- | --- | --- |
|  | **Quantitation:** | **Ratio** | **Weighted** | **N** | **SD(geo)** |
|  |  | Patient1-Art/Control | --- | 1 | --- |
|  |  | Patient1-Porta/Control | --- | 1 | --- |
|  |  | Patient1-Hepa/Control | --- | 1 | --- |
|  |  | Patient2-Art/Control | --- | 1 | --- |
|  |  | Patient2-Porta/Control | --- | 1 | --- |
|  |  | Patient2-Hepa/Control | --- | 1 | --- |

|  |  |  |  |  |  |  |  |  |  |  |  |  |  |  |  |  |
| --- | --- | --- | --- | --- | --- | --- | --- | --- | --- | --- | --- | --- | --- | --- | --- | --- |
|  | **Query** | **Observed** | **Mr(expt)** | **Mr(calc)** | **Delta** | **Miss** | **Score** | **Expect** | **Rank** | **Patient1-Art/Control** | **Patient1-Porta/Control** | **Patient1-Hepa/Control** | **Patient2-Art/Control** | **Patient2-Porta/Control** | **Patient2-Hepa/Control** | **Peptide** |
|  | 9768 | **927.94** | **1853.86** | **1853.93** | **-0.06** | **0** | **84** | **1.4e-007** | **1** | **1.133** | **1.034** | **0.961** | **0.504** | **0.468** | **0.837** | **R.SFFSFLGEAFDGAR.D** |

  


---

|  |  |
| --- | --- |
| **45.** | P10643    **Mass:** 110939   **Score:** 70     **Queries matched:** 4   **emPAI:** 0.10 |
|  | Complement component C7 OS=Homo sapiens GN=C7 PE=1 SV=2 |

|  |  |  |  |  |  |
| --- | --- | --- | --- | --- | --- |
|  | **Quantitation:** | **Ratio** | **Weighted** | **N** | **SD(geo)** |
|  |  | Patient1-Art/Control | --- | 2 | --- |
|  |  | Patient1-Porta/Control | --- | 2 | --- |
|  |  | Patient1-Hepa/Control | --- | 2 | --- |
|  |  | Patient2-Art/Control | --- | 2 | --- |
|  |  | Patient2-Porta/Control | --- | 2 | --- |
|  |  | Patient2-Hepa/Control | --- | 2 | --- |

|  |  |  |  |  |  |  |  |  |  |  |  |  |  |  |  |  |
| --- | --- | --- | --- | --- | --- | --- | --- | --- | --- | --- | --- | --- | --- | --- | --- | --- |
|  | **Query** | **Observed** | **Mr(expt)** | **Mr(calc)** | **Delta** | **Miss** | **Score** | **Expect** | **Rank** | **Patient1-Art/Control** | **Patient1-Porta/Control** | **Patient1-Hepa/Control** | **Patient2-Art/Control** | **Patient2-Porta/Control** | **Patient2-Hepa/Control** | **Peptide** |
|  | 8266 | **842.50** | **1682.98** | **1683.04** | **-0.07** | **0** | **43** | **0.0035** | **1** | **0.961** | **0.926** | **0.661** | **0.791** | **0.999** | **0.668** | **K.LTPLYELVK.E** 8265 |
|  | 10780 | **688.74** | **2063.19** | **2063.19** | **0.00** | **0** | **46** | **0.0018** | **1** | **0.876** | **0.724** | **0.618** | **0.914** | **0.776** | **0.782** | **R.LSGNVLSYTFQVK.I** |
|  | 17422 | **962.05** | **3844.16** | **3844.09** | **0.07** | **0** | **12** | **3** | **1** | **---** | **---** | **---** | **---** | **---** | **---** | **K.IACVLPVLMDGIQSHPQKPFYTVGEK.V** |

  


---

|  |  |
| --- | --- |
| **46.** | P00747    **Mass:** 107928   **Score:** 66     **Queries matched:** 21   **emPAI:** 0.11 |
|  | Plasminogen OS=Homo sapiens GN=PLG PE=1 SV=2 |

|  |  |  |  |  |  |
| --- | --- | --- | --- | --- | --- |
|  | **Quantitation:** | **Ratio** | **Weighted** | **N** | **SD(geo)** |
|  |  | Patient1-Art/Control | --- | 2 | --- |
|  |  | Patient1-Porta/Control | --- | 2 | --- |
|  |  | Patient1-Hepa/Control | --- | 2 | --- |
|  |  | Patient2-Art/Control | --- | 2 | --- |
|  |  | Patient2-Porta/Control | --- | 2 | --- |
|  |  | Patient2-Hepa/Control | --- | 2 | --- |

|  |  |  |  |  |  |  |  |  |  |  |  |  |  |  |  |  |
| --- | --- | --- | --- | --- | --- | --- | --- | --- | --- | --- | --- | --- | --- | --- | --- | --- |
|  | **Query** | **Observed** | **Mr(expt)** | **Mr(calc)** | **Delta** | **Miss** | **Score** | **Expect** | **Rank** | **Patient1-Art/Control** | **Patient1-Porta/Control** | **Patient1-Hepa/Control** | **Patient2-Art/Control** | **Patient2-Porta/Control** | **Patient2-Hepa/Control** | **Peptide** |
|  | 4508 | **590.35** | **1178.69** | **1178.70** | **-0.00** | **0** | **26** | **0.11** | **1** | **---** | **---** | **---** | **---** | **---** | **---** | **R.LFLEPTR.K** 4489 4493 4494 4496 4500 4501 4506 4509 4512 4513 |
|  | 6050 | **691.31** | **1380.61** | **1380.68** | **-0.08** | **0** | **22** | **0.18** | **1** | **---** | **---** | **---** | **---** | **---** | **---** | **R.WELCDIPR.C** 6052 |
|  | 6061 | **691.83** | **1381.64** | **1381.70** | **-0.06** | **0** | **1** | **38** | **1** | **---** | **---** | **---** | **---** | **---** | **---** | **R.WEYCK.I** |
|  | 7345 | **779.39** | **1556.77** | **1556.83** | **-0.06** | **0** | **34** | **0.022** | **1** | **0.952** | **0.728** | **0.527** | **0.845** | **1.022** | **0.617** | **R.FVTWIEGVMR.N** |
|  | 7524 | **530.62** | **1588.82** | **1588.82** | **0.00** | **0** | **18** | **0.96** | **1** | **---** | **---** | **---** | **---** | **---** | **---** | **R.TPENFPCK.N** |
|  | 7650 | **538.00** | **1610.96** | **1611.00** | **-0.03** | **1** | **6** | **16** | **1** | **---** | **---** | **---** | **---** | **---** | **---** | **R.LFLEPTRK.D** |
|  | 7898 | 546.98 | 1637.91 | 1637.98 | -0.07 | 0 | 3 | 34 | 9 | --- | --- | --- | --- | --- | --- | K.LSSPAVITDK.V |
|  | 8789 | 583.65 | 1747.92 | 1748.03 | -0.11 | 0 | 4 | 24 | 2 | --- | --- | --- | --- | --- | --- | K.EAQLPVIENK.V |
|  | 10777 | **688.71** | **2063.10** | **2063.09** | **0.01** | **0** | **50** | **0.00069** | **1** | **0.733** | **0.595** | **0.551** | **0.827** | **0.951** | **0.824** | **K.VIPACLPSPNYVVADR.T** 10772 |

  


---

|  |  |
| --- | --- |
| **47.** | P01860    **Mass:** 50606    **Score:** 65     **Queries matched:** 8   **emPAI:** 0.07 |
|  | Ig gamma-3 chain C region OS=Homo sapiens GN=IGHG3 PE=1 SV=2 |

|  |  |  |  |  |  |
| --- | --- | --- | --- | --- | --- |
|  | **Quantitation:** | **Ratio** | **Weighted** | **N** | **SD(geo)** |
|  |  | **Patient1-Art/Control** | **0.823** | **3** | **1.016** |
|  |  | **Patient1-Porta/Control** | **0.805** | **3** | **1.018** |
|  |  | **Patient1-Hepa/Control** | **0.546** | **3** | **1.026** |
|  |  | Patient2-Art/Control | 0.947 | 3 | 1.032 |
|  |  | **Patient2-Porta/Control** | **1.183** | **3** | **1.066** |
|  |  | **Patient2-Hepa/Control** | **0.706** | **3** | **1.038** |

|  |  |  |  |  |  |  |  |  |  |  |  |  |  |  |  |  |
| --- | --- | --- | --- | --- | --- | --- | --- | --- | --- | --- | --- | --- | --- | --- | --- | --- |
|  | **Query** | **Observed** | **Mr(expt)** | **Mr(calc)** | **Delta** | **Miss** | **Score** | **Expect** | **Rank** | **Patient1-Art/Control** | **Patient1-Porta/Control** | **Patient1-Hepa/Control** | **Patient2-Art/Control** | **Patient2-Porta/Control** | **Patient2-Hepa/Control** | **Peptide** |
|  | 4297 | **578.32** | **1154.63** | **1154.63** | **0.00** | **0** | **7** | **17** | **1** | **---** | **---** | **---** | **---** | **---** | **---** | **K.DTLMISR.T** 4308 |
|  | 7977 | **550.27** | **1647.78** | **1647.80** | **-0.02** | **0** | **25** | **0.12** | **1** | **---** | **---** | **---** | **---** | **---** | **---** | **K.TPLGDTTHTCPR.C** 7978 |
|  | 16032 | **763.94** | **3051.72** | **3051.74** | **-0.03** | **0** | **43** | **0.0028** | **1** | **0.830** | **0.805** | **0.533** | **0.908** | **1.176** | **0.695** | **R.CPAPELLGGPSVFLFPPKPK.D** 16031 16033 16034 |

  


---

|  |  |
| --- | --- |
| **48.** | P01876    **Mass:** 42579    **Score:** 60     **Queries matched:** 12   **emPAI:** 0.29 |
|  | Ig alpha-1 chain C region OS=Homo sapiens GN=IGHA1 PE=1 SV=2 |

|  |  |  |  |  |  |
| --- | --- | --- | --- | --- | --- |
|  | **Quantitation:** | **Ratio** | **Weighted** | **N** | **SD(geo)** |
|  |  | Patient1-Art/Control | --- | 2 | --- |
|  |  | Patient1-Porta/Control | --- | 2 | --- |
|  |  | Patient1-Hepa/Control | --- | 2 | --- |
|  |  | Patient2-Art/Control | --- | 2 | --- |
|  |  | Patient2-Porta/Control | --- | 2 | --- |
|  |  | Patient2-Hepa/Control | --- | 2 | --- |

|  |  |  |  |  |  |  |  |  |  |  |  |  |  |  |  |  |
| --- | --- | --- | --- | --- | --- | --- | --- | --- | --- | --- | --- | --- | --- | --- | --- | --- |
|  | **Query** | **Observed** | **Mr(expt)** | **Mr(calc)** | **Delta** | **Miss** | **Score** | **Expect** | **Rank** | **Patient1-Art/Control** | **Patient1-Porta/Control** | **Patient1-Hepa/Control** | **Patient2-Art/Control** | **Patient2-Porta/Control** | **Patient2-Hepa/Control** | **Peptide** |
|  | 1763 | **453.28** | **904.54** | **904.56** | **-0.02** | **0** | **20** | **0.38** | **1** | **---** | **---** | **---** | **---** | **---** | **---** | **K.DVLVR.W** 1756 1757 1765 |
|  | 4895 | **622.82** | **1243.63** | **1243.68** | **-0.06** | **0** | **24** | **0.23** | **1** | **---** | **---** | **---** | **---** | **---** | **---** | **K.SAVQGPPER.D** 4896 |
|  | 7094 | **759.40** | **1516.79** | **1516.83** | **-0.04** | **0** | **9** | **7.5** | **1** | **---** | **---** | **---** | **---** | **---** | **---** | **R.WLQGSQELPR.E** |
|  | 7264 | **513.99** | **1538.95** | **1538.95** | **-0.00** | **0** | **39** | **0.0074** | **1** | **0.659** | **1.027** | **0.362** | **0.600** | **0.742** | **0.256** | **K.TPLTATLSK.S** |
|  | 11266 | **1070.59** | **2139.16** | **2139.15** | **0.01** | **0** | **7** | **12** | **1** | **---** | **---** | **---** | **---** | **---** | **---** | **R.QEPSQGTTTFAVTSILR.V** |
|  | 11315 | **717.05** | **2148.13** | **2148.13** | **0.00** | **0** | **48** | **0.0011** | **1** | **2.341** | **1.897** | **1.112** | **1.903** | **1.379** | **1.285** | **R.DASGVTFTWTPSSGK.S** |
|  | 17297 | **942.21** | **3764.82** | **3764.89** | **-0.06** | **0** | **16** | **0.8** | **1** | **---** | **---** | **---** | **---** | **---** | **---** | **R.NFPPSQDASGDLYTTSSQLTLPATQCLAGK.S** 17299 |

  


---

|  |  |
| --- | --- |
| **49.** | P01031    **Mass:** 226070   **Score:** 59     **Queries matched:** 12   **emPAI:** 0.03 |
|  | Complement C5 OS=Homo sapiens GN=C5 PE=1 SV=4 |

|  |  |  |  |  |  |
| --- | --- | --- | --- | --- | --- |
|  | **Quantitation:** | **Ratio** | **Weighted** | **N** | **SD(geo)** |
|  |  | Patient1-Art/Control | --- | 2 | --- |
|  |  | Patient1-Porta/Control | --- | 2 | --- |
|  |  | Patient1-Hepa/Control | --- | 2 | --- |
|  |  | Patient2-Art/Control | --- | 2 | --- |
|  |  | Patient2-Porta/Control | --- | 2 | --- |
|  |  | Patient2-Hepa/Control | --- | 2 | --- |

|  |  |  |  |  |  |  |  |  |  |  |  |  |  |  |  |  |
| --- | --- | --- | --- | --- | --- | --- | --- | --- | --- | --- | --- | --- | --- | --- | --- | --- |
|  | **Query** | **Observed** | **Mr(expt)** | **Mr(calc)** | **Delta** | **Miss** | **Score** | **Expect** | **Rank** | **Patient1-Art/Control** | **Patient1-Porta/Control** | **Patient1-Hepa/Control** | **Patient2-Art/Control** | **Patient2-Porta/Control** | **Patient2-Hepa/Control** | **Peptide** |
|  | 6089 | 694.36 | 1386.70 | 1386.81 | -0.11 | 0 | 25 | 0.25 | 1 | --- | --- | --- | --- | --- | --- | K.LQGTLPVEAR.E 6088 |
|  | 6966 | 751.95 | 1501.88 | 1501.97 | -0.09 | 0 | 7 | 15 | 5 | --- | --- | --- | --- | --- | --- | R.IPLDLVPK.T 6969 |
|  | 7011 | **502.30** | **1503.87** | **1503.99** | **-0.12** | **1** | **0** | **55** | **2** | **---** | **---** | **---** | **---** | **---** | **---** | **K.AKVFK.D** |
|  | 7102 | **759.96** | **1517.90** | **1517.91** | **-0.00** | **0** | **7** | **13** | **3** | **---** | **---** | **---** | **---** | **---** | **---** | **R.VFQFLEK.S** |
|  | 12848 | **798.13** | **2391.38** | **2391.35** | **0.02** | **0** | **51** | **0.00053** | **1** | **1.441** | **0.948** | **0.889** | **0.959** | **1.055** | **0.777** | **R.MVETTAYALLTSLNLK.D** 12847 |
|  | 13110 | 811.77 | 2432.29 | 2432.43 | -0.14 | 1 | 4 | 28 | 3 | --- | --- | --- | --- | --- | --- | R.ENSLYLTAFTVIGIRK.A |
|  | 15133 | **953.80** | **2858.38** | **2858.41** | **-0.03** | **0** | **0** | **34** | **4** | **---** | **---** | **---** | **---** | **---** | **---** | **K.MSAVEGICTSESPVIDHQGTK.S** |
|  | 16228 | 1034.85 | 3101.52 | 3101.70 | -0.18 | 1 | 2 | 29 | 2 | --- | --- | --- | --- | --- | --- | K.YKEDFSTTGTAYFEVK.E |
|  | 17517 | **995.04** | **3976.12** | **3976.07** | **0.05** | **0** | **19** | **0.61** | **1** | **---** | **---** | **---** | **---** | **---** | **---** | **K.DSLDQLVGGVPVTLNAQTIDVNQETSDLDPSK.S** |

  


---

|  |  |
| --- | --- |
| **50.** | P43652    **Mass:** 86406    **Score:** 56     **Queries matched:** 13   **emPAI:** 0.04 |
|  | Afamin OS=Homo sapiens GN=AFM PE=1 SV=1 |

|  |  |  |  |  |  |
| --- | --- | --- | --- | --- | --- |
|  | **Quantitation:** | **Ratio** | **Weighted** | **N** | **SD(geo)** |
|  |  | Patient1-Art/Control | --- | 1 | --- |
|  |  | Patient1-Porta/Control | --- | 1 | --- |
|  |  | Patient1-Hepa/Control | --- | 1 | --- |
|  |  | Patient2-Art/Control | --- | 1 | --- |
|  |  | Patient2-Porta/Control | --- | 1 | --- |
|  |  | Patient2-Hepa/Control | --- | 1 | --- |

|  |  |  |  |  |  |  |  |  |  |  |  |  |  |  |  |  |
| --- | --- | --- | --- | --- | --- | --- | --- | --- | --- | --- | --- | --- | --- | --- | --- | --- |
|  | **Query** | **Observed** | **Mr(expt)** | **Mr(calc)** | **Delta** | **Miss** | **Score** | **Expect** | **Rank** | **Patient1-Art/Control** | **Patient1-Porta/Control** | **Patient1-Hepa/Control** | **Patient2-Art/Control** | **Patient2-Porta/Control** | **Patient2-Hepa/Control** | **Peptide** |
|  | 1845 | **454.26** | **906.50** | **906.54** | **-0.04** | **0** | **10** | **4.5** | **5** | **---** | **---** | **---** | **---** | **---** | **---** | **K.DLSLR.E** |
|  | 3565 | **530.28** | **1058.55** | **1058.58** | **-0.03** | **0** | **6** | **12** | **1** | **---** | **---** | **---** | **---** | **---** | **---** | **K.TNFAFR.R** 3563 |
|  | 4932 | **627.31** | **1252.60** | **1252.64** | **-0.04** | **0** | **13** | **3.3** | **1** | **---** | **---** | **---** | **---** | **---** | **---** | **K.FTFEYSR.R** 4931 |
|  | 7523 | **530.29** | **1587.86** | **1587.84** | **0.02** | **0** | **11** | **5.2** | **1** | **---** | **---** | **---** | **---** | **---** | **---** | **R.LCFFYNK.K** |
|  | 7859 | **545.29** | **1632.84** | **1632.89** | **-0.06** | **0** | **12** | **4** | **1** | **---** | **---** | **---** | **---** | **---** | **---** | **R.RPCFESLK.A** 7860 |
|  | 10034 | **634.28** | **1899.83** | **1899.93** | **-0.10** | **0** | **11** | **1.3** | **1** | **---** | **---** | **---** | **---** | **---** | **---** | **R.TINPAVDHCCK.T** |
|  | 13597 | **832.79** | **2495.35** | **2495.34** | **0.01** | **0** | **39** | **0.0091** | **1** | **1.173** | **0.972** | **0.804** | **1.284** | **1.373** | **0.852** | **K.SDVGFLPPFPTLDPEEK.C** 13594 13595 13596 |

  


---

|  |  |
| --- | --- |
| **51.** | P05156    **Mass:** 80993    **Score:** 50     **Queries matched:** 6   **emPAI:** 0.05 |
|  | Complement factor I OS=Homo sapiens GN=CFI PE=1 SV=1 |

|  |  |  |  |  |  |
| --- | --- | --- | --- | --- | --- |
|  | **Quantitation:** | **Ratio** | **Weighted** | **N** | **SD(geo)** |
|  |  | Patient1-Art/Control | --- | 1 | --- |
|  |  | Patient1-Porta/Control | --- | 1 | --- |
|  |  | Patient1-Hepa/Control | --- | 1 | --- |
|  |  | Patient2-Art/Control | --- | 1 | --- |
|  |  | Patient2-Porta/Control | --- | 1 | --- |
|  |  | Patient2-Hepa/Control | --- | 1 | --- |

|  |  |  |  |  |  |  |  |  |  |  |  |  |  |  |  |  |
| --- | --- | --- | --- | --- | --- | --- | --- | --- | --- | --- | --- | --- | --- | --- | --- | --- |
|  | **Query** | **Observed** | **Mr(expt)** | **Mr(calc)** | **Delta** | **Miss** | **Score** | **Expect** | **Rank** | **Patient1-Art/Control** | **Patient1-Porta/Control** | **Patient1-Hepa/Control** | **Patient2-Art/Control** | **Patient2-Porta/Control** | **Patient2-Hepa/Control** | **Peptide** |
|  | 5454 | **655.92** | **1309.82** | **1309.75** | **0.07** | **0** | **10** | **6.2** | **1** | **---** | **---** | **---** | **---** | **---** | **---** | **R.IVIEYVDR.I** 5450 |
|  | 8685 | **580.32** | **1737.94** | **1737.94** | **0.01** | **0** | **7** | **12** | **1** | **---** | **---** | **---** | **---** | **---** | **---** | **K.SLECLHPGTK.F** |
|  | 10733 | **685.35** | **2053.02** | **2053.07** | **-0.04** | **0** | **50** | **0.0006** | **1** | **0.817** | **0.969** | **0.630** | **0.981** | **1.049** | **0.896** | **R.GLETSLAECTFTK.R** |
|  | 15671 | **998.53** | **2992.55** | **2992.39** | **0.17** | **0** | **3** | **32** | **1** | **---** | **---** | **---** | **---** | **---** | **---** | **K.DASGITCGGIYIGGCWILTAAHCLR.A** 15670 |

  


---

|  |  |
| --- | --- |
| **52.** | P07357    **Mass:** 76539    **Score:** 49     **Queries matched:** 6   **emPAI:** 0.10 |
|  | Complement component C8 alpha chain OS=Homo sapiens GN=C8A PE=1 SV=2 |

|  |  |  |  |  |  |
| --- | --- | --- | --- | --- | --- |
|  | **Quantitation:** | **Ratio** | **Weighted** | **N** | **SD(geo)** |
|  |  | Patient1-Art/Control | --- | 2 | --- |
|  |  | Patient1-Porta/Control | --- | 2 | --- |
|  |  | Patient1-Hepa/Control | --- | 2 | --- |
|  |  | Patient2-Art/Control | --- | 2 | --- |
|  |  | Patient2-Porta/Control | --- | 2 | --- |
|  |  | Patient2-Hepa/Control | --- | 2 | --- |

|  |  |  |  |  |  |  |  |  |  |  |  |  |  |  |  |  |
| --- | --- | --- | --- | --- | --- | --- | --- | --- | --- | --- | --- | --- | --- | --- | --- | --- |
|  | **Query** | **Observed** | **Mr(expt)** | **Mr(calc)** | **Delta** | **Miss** | **Score** | **Expect** | **Rank** | **Patient1-Art/Control** | **Patient1-Porta/Control** | **Patient1-Hepa/Control** | **Patient2-Art/Control** | **Patient2-Porta/Control** | **Patient2-Hepa/Control** | **Peptide** |
|  | 9782 | **619.65** | **1855.93** | **1856.07** | **-0.13** | **1** | **1** | **44** | **3** | **---** | **---** | **---** | **---** | **---** | **---** | **R.KAMAVEDIISR.V** |
|  | 11461 | 720.11 | 2157.30 | 2157.30 | -0.00 | 2 | 1 | 51 | 2 | --- | --- | --- | --- | --- | --- | K.VQTAHFKMRK.D |
|  | 13755 | **840.45** | **2518.33** | **2518.32** | **0.01** | **0** | **32** | **0.044** | **1** | **1.159** | **1.089** | **0.768** | **0.983** | **1.146** | **0.894** | **K.YNPVVIDFEMQPIHEVLR.H** 13754 |
|  | 13850 | **845.40** | **2533.19** | **2533.23** | **-0.04** | **0** | **36** | **0.0078** | **1** | **1.222** | **0.870** | **1.111** | **0.925** | **1.379** | **1.027** | **R.AIDEDCSQYEPIPGSQK.A** 13851 |

  


---

|  |  |
| --- | --- |
| **53.** | P06681    **Mass:** 95574    **Score:** 49     **Queries matched:** 3   **emPAI:** 0.08 |
|  | Complement C2 OS=Homo sapiens GN=C2 PE=1 SV=2 |

|  |  |  |  |  |  |
| --- | --- | --- | --- | --- | --- |
|  | **Quantitation:** | **Ratio** | **Weighted** | **N** | **SD(geo)** |
|  |  | Patient1-Art/Control | --- | 1 | --- |
|  |  | Patient1-Porta/Control | --- | 1 | --- |
|  |  | Patient1-Hepa/Control | --- | 1 | --- |
|  |  | Patient2-Art/Control | --- | 1 | --- |
|  |  | Patient2-Porta/Control | --- | 1 | --- |
|  |  | Patient2-Hepa/Control | --- | 1 | --- |

|  |  |  |  |  |  |  |  |  |  |  |  |  |  |  |  |  |
| --- | --- | --- | --- | --- | --- | --- | --- | --- | --- | --- | --- | --- | --- | --- | --- | --- |
|  | **Query** | **Observed** | **Mr(expt)** | **Mr(calc)** | **Delta** | **Miss** | **Score** | **Expect** | **Rank** | **Patient1-Art/Control** | **Patient1-Porta/Control** | **Patient1-Hepa/Control** | **Patient2-Art/Control** | **Patient2-Porta/Control** | **Patient2-Hepa/Control** | **Peptide** |
|  | 5891 | **455.92** | **1364.74** | **1364.75** | **-0.01** | **0** | **22** | **0.35** | **1** | **---** | **---** | **---** | **---** | **---** | **---** | **R.DFHINLFR.M** |
|  | 8286 | **563.67** | **1688.00** | **1688.04** | **-0.05** | **0** | **46** | **0.0018** | **1** | **0.704** | **0.627** | **0.490** | **0.885** | **0.947** | **0.608** | **R.HAIILLTDGK.S** |
|  | 15666 | **998.49** | **2992.45** | **2992.64** | **-0.18** | **2** | **0** | **39** | **6** | **---** | **---** | **---** | **---** | **---** | **---** | **R.LCKSSGQWQTPGATRSLSK.A** |

  


---

|  |  |
| --- | --- |
| **54.** | P02655    **Mass:** 13406    **Score:** 43     **Queries matched:** 3   **emPAI:** 0.29 |
|  | Apolipoprotein C-II OS=Homo sapiens GN=APOC2 PE=1 SV=1 |

|  |  |  |  |  |  |
| --- | --- | --- | --- | --- | --- |
|  | **Quantitation:** | **Ratio** | **Weighted** | **N** | **SD(geo)** |
|  |  | Patient1-Art/Control | --- | 1 | --- |
|  |  | Patient1-Porta/Control | --- | 1 | --- |
|  |  | Patient1-Hepa/Control | --- | 1 | --- |
|  |  | Patient2-Art/Control | --- | 1 | --- |
|  |  | Patient2-Porta/Control | --- | 1 | --- |
|  |  | Patient2-Hepa/Control | --- | 1 | --- |

|  |  |  |  |  |  |  |  |  |  |  |  |  |  |  |  |  |
| --- | --- | --- | --- | --- | --- | --- | --- | --- | --- | --- | --- | --- | --- | --- | --- | --- |
|  | **Query** | **Observed** | **Mr(expt)** | **Mr(calc)** | **Delta** | **Miss** | **Score** | **Expect** | **Rank** | **Patient1-Art/Control** | **Patient1-Porta/Control** | **Patient1-Hepa/Control** | **Patient2-Art/Control** | **Patient2-Porta/Control** | **Patient2-Hepa/Control** | **Peptide** |
|  | 15120 | **953.20** | **2856.56** | **2856.54** | **0.02** | **0** | **43** | **0.003** | **1** | **0.873** | **0.477** | **0.734** | **0.145** | **0.963** | **0.587** | **K.STAAMSTYTGIFTDQVLSVLK.G** 15101 15125 |

  


---

|  |  |
| --- | --- |
| **55.** | P02749    **Mass:** 48761    **Score:** 42     **Queries matched:** 9   **emPAI:** 0.16 |
|  | Beta-2-glycoprotein 1 OS=Homo sapiens GN=APOH PE=1 SV=3 |

|  |  |  |  |  |  |
| --- | --- | --- | --- | --- | --- |
|  | **Quantitation:** | **Ratio** | **Weighted** | **N** | **SD(geo)** |
|  |  | **Patient1-Art/Control** | **0.699** | **3** | **1.051** |
|  |  | **Patient1-Porta/Control** | **0.696** | **3** | **1.066** |
|  |  | **Patient1-Hepa/Control** | **0.470** | **3** | **1.077** |
|  |  | Patient2-Art/Control | 1.285 | 3 | 1.327 |
|  |  | Patient2-Porta/Control | 1.442 | 3 | 1.212 |
|  |  | Patient2-Hepa/Control | 0.805 | 3 | 1.257 |

|  |  |  |  |  |  |  |  |  |  |  |  |  |  |  |  |  |
| --- | --- | --- | --- | --- | --- | --- | --- | --- | --- | --- | --- | --- | --- | --- | --- | --- |
|  | **Query** | **Observed** | **Mr(expt)** | **Mr(calc)** | **Delta** | **Miss** | **Score** | **Expect** | **Rank** | **Patient1-Art/Control** | **Patient1-Porta/Control** | **Patient1-Hepa/Control** | **Patient2-Art/Control** | **Patient2-Porta/Control** | **Patient2-Hepa/Control** | **Peptide** |
|  | 5564 | **663.81** | **1325.60** | **1325.72** | **-0.12** | **0** | **34** | **0.021** | **1** | **0.697** | **0.693** | **0.468** | **1.304** | **1.456** | **0.814** | **K.ATVVYQGER.V** 5565 |
|  | 6081 | **692.85** | **1383.69** | **1383.75** | **-0.06** | **0** | **5** | **19** | **2** | **---** | **---** | **---** | **---** | **---** | **---** | **K.VSFFCK.N** 6084 |
|  | 12729 | **790.80** | **2369.37** | **2369.35** | **0.02** | **0** | **33** | **0.036** | **1** | **0.772** | **0.787** | **0.545** | **0.848** | **1.215** | **0.515** | **K.FICPLTGLWPINTLK.C** 12725 12728 |
|  | 16220 | **1034.55** | **3100.63** | **3100.59** | **0.03** | **0** | **2** | **37** | **7** | **---** | **---** | **---** | **---** | **---** | **---** | **K.WSPELPVCAPIICPPPSIPTFATLR.V** |
|  | 16637 | **821.91** | **3283.62** | **3283.67** | **-0.05** | **0** | **4** | **17** | **1** | **---** | **---** | **---** | **---** | **---** | **---** | **K.TFYEPGEEITYSCKPGYVSR.G** |

  


---

|  |  |
| --- | --- |
| **56.** | P36955    **Mass:** 54969    **Score:** 41     **Queries matched:** 6   **emPAI:** 0.07 |
|  | Pigment epithelium-derived factor OS=Homo sapiens GN=SERPINF1 PE=1 SV=3 |

|  |  |  |  |  |  |
| --- | --- | --- | --- | --- | --- |
|  | **Quantitation:** | **Ratio** | **Weighted** | **N** | **SD(geo)** |
|  |  | Patient1-Art/Control | --- | 1 | --- |
|  |  | Patient1-Porta/Control | --- | 1 | --- |
|  |  | Patient1-Hepa/Control | --- | 1 | --- |
|  |  | Patient2-Art/Control | --- | 1 | --- |
|  |  | Patient2-Porta/Control | --- | 1 | --- |
|  |  | Patient2-Hepa/Control | --- | 1 | --- |

|  |  |  |  |  |  |  |  |  |  |  |  |  |  |  |  |  |
| --- | --- | --- | --- | --- | --- | --- | --- | --- | --- | --- | --- | --- | --- | --- | --- | --- |
|  | **Query** | **Observed** | **Mr(expt)** | **Mr(calc)** | **Delta** | **Miss** | **Score** | **Expect** | **Rank** | **Patient1-Art/Control** | **Patient1-Porta/Control** | **Patient1-Hepa/Control** | **Patient2-Art/Control** | **Patient2-Porta/Control** | **Patient2-Hepa/Control** | **Peptide** |
|  | 9903 | **629.02** | **1884.05** | **1884.04** | **0.01** | **1** | **3** | **33** | **3** | **---** | **---** | **---** | **---** | **---** | **---** | **R.TVRVPMMSDPK.A** 9906 |
|  | 14424 | **905.20** | **2712.58** | **2712.61** | **-0.03** | **0** | **36** | **0.017** | **1** | **0.788** | **0.739** | **0.318** | **1.142** | **1.121** | **0.924** | **K.IAQLPLTGSMSIIFFLPLK.V** 14425 |
|  | 16694 | **1107.95** | **3320.83** | **3320.78** | **0.05** | **0** | **4** | **23** | **1** | **---** | **---** | **---** | **---** | **---** | **---** | **R.SSMSPTTNVLLSPLSVATALSALSLGAEQR.T** 16693 |

  


---

|  |  |
| --- | --- |
| **57.** | P04264    **Mass:** 74959    **Score:** 39     **Queries matched:** 2   **emPAI:** 0.05 |
|  | Keratin, type II cytoskeletal 1 OS=Homo sapiens GN=KRT1 PE=1 SV=6 |

|  |  |  |  |  |  |
| --- | --- | --- | --- | --- | --- |
|  | **Quantitation:** | **Ratio** | **Weighted** | **N** | **SD(geo)** |
|  |  | Patient1-Art/Control | --- | 1 | --- |
|  |  | Patient1-Porta/Control | --- | 1 | --- |
|  |  | Patient1-Hepa/Control | --- | 1 | --- |
|  |  | Patient2-Art/Control | --- | 1 | --- |
|  |  | Patient2-Porta/Control | --- | 1 | --- |
|  |  | Patient2-Hepa/Control | --- | 1 | --- |

|  |  |  |  |  |  |  |  |  |  |  |  |  |  |  |  |  |
| --- | --- | --- | --- | --- | --- | --- | --- | --- | --- | --- | --- | --- | --- | --- | --- | --- |
|  | **Query** | **Observed** | **Mr(expt)** | **Mr(calc)** | **Delta** | **Miss** | **Score** | **Expect** | **Rank** | **Patient1-Art/Control** | **Patient1-Porta/Control** | **Patient1-Hepa/Control** | **Patient2-Art/Control** | **Patient2-Porta/Control** | **Patient2-Hepa/Control** | **Peptide** |
|  | 10077 | **637.71** | **1910.10** | **1910.12** | **-0.02** | **0** | **36** | **0.015** | **1** | **0.932** | **0.780** | **1.001** | **0.711** | **0.951** | **0.538** | **R.SLDLDSIIAEVK.A** 10076 |

  


---

|  |  |
| --- | --- |
| **58.** | Q9NP78    **Mass:** 93003    **Score:** 38     **Queries matched:** 5   **emPAI:** 0.04 |
|  | ATP-binding cassette sub-family B member 9 OS=Homo sapiens GN=ABCB9 PE=1 SV=1 |

|  |  |  |  |  |  |
| --- | --- | --- | --- | --- | --- |
|  | **Quantitation:** | **Ratio** | **Weighted** | **N** | **SD(geo)** |
|  |  | Patient1-Art/Control | --- | 1 | --- |
|  |  | Patient1-Porta/Control | --- | 1 | --- |
|  |  | Patient1-Hepa/Control | --- | 1 | --- |
|  |  | Patient2-Art/Control | --- | 1 | --- |
|  |  | Patient2-Porta/Control | --- | 1 | --- |
|  |  | Patient2-Hepa/Control | --- | 1 | --- |

|  |  |  |  |  |  |  |  |  |  |  |  |  |  |  |  |  |
| --- | --- | --- | --- | --- | --- | --- | --- | --- | --- | --- | --- | --- | --- | --- | --- | --- |
|  | **Query** | **Observed** | **Mr(expt)** | **Mr(calc)** | **Delta** | **Miss** | **Score** | **Expect** | **Rank** | **Patient1-Art/Control** | **Patient1-Porta/Control** | **Patient1-Hepa/Control** | **Patient2-Art/Control** | **Patient2-Porta/Control** | **Patient2-Hepa/Control** | **Peptide** |
|  | 4222 | **575.34** | **1148.66** | **1148.67** | **-0.01** | **0** | **38** | **0.0073** | **1** | **0.671** | **0.793** | **0.752** | **1.439** | **1.254** | **1.135** | **R.SLLEDIR.H** 4209 4210 4216 4220 |

  


---

|  |  |
| --- | --- |
| **59.** | P05452    **Mass:** 28046    **Score:** 38     **Queries matched:** 4   **emPAI:** 0.13 |
|  | Tetranectin OS=Homo sapiens GN=CLEC3B PE=1 SV=2 |

|  |  |  |  |  |  |
| --- | --- | --- | --- | --- | --- |
|  | **Quantitation:** | **Ratio** | **Weighted** | **N** | **SD(geo)** |
|  |  | Patient1-Art/Control | --- | 1 | --- |
|  |  | Patient1-Porta/Control | --- | 1 | --- |
|  |  | Patient1-Hepa/Control | --- | 0 | --- |
|  |  | Patient2-Art/Control | --- | 1 | --- |
|  |  | Patient2-Porta/Control | --- | 1 | --- |
|  |  | Patient2-Hepa/Control | --- | 1 | --- |

|  |  |  |  |  |  |  |  |  |  |  |  |  |  |  |  |  |
| --- | --- | --- | --- | --- | --- | --- | --- | --- | --- | --- | --- | --- | --- | --- | --- | --- |
|  | **Query** | **Observed** | **Mr(expt)** | **Mr(calc)** | **Delta** | **Miss** | **Score** | **Expect** | **Rank** | **Patient1-Art/Control** | **Patient1-Porta/Control** | **Patient1-Hepa/Control** | **Patient2-Art/Control** | **Patient2-Porta/Control** | **Patient2-Hepa/Control** | **Peptide** |
|  | 8775 | **873.47** | **1744.92** | **1744.88** | **0.03** | **0** | **38** | **0.011** | **1** | **0.743** | **0.701** | **-0.089** | **1.498** | **0.388** | **1.207** | **R.DQLPYICQFGIV.-** 8771 8772 8773 |

  


---

|  |  |
| --- | --- |
| **60.** | P05546    **Mass:** 67515    **Score:** 35     **Queries matched:** 6   **emPAI:** 0.17 |
|  | Heparin cofactor 2 OS=Homo sapiens GN=SERPIND1 PE=1 SV=3 |

|  |  |  |  |  |  |
| --- | --- | --- | --- | --- | --- |
|  | **Quantitation:** | **Ratio** | **Weighted** | **N** | **SD(geo)** |
|  |  | Patient1-Art/Control | --- | 1 | --- |
|  |  | Patient1-Porta/Control | --- | 1 | --- |
|  |  | Patient1-Hepa/Control | --- | 1 | --- |
|  |  | Patient2-Art/Control | --- | 1 | --- |
|  |  | Patient2-Porta/Control | --- | 1 | --- |
|  |  | Patient2-Hepa/Control | --- | 1 | --- |

|  |  |  |  |  |  |  |  |  |  |  |  |  |  |  |  |  |
| --- | --- | --- | --- | --- | --- | --- | --- | --- | --- | --- | --- | --- | --- | --- | --- | --- |
|  | **Query** | **Observed** | **Mr(expt)** | **Mr(calc)** | **Delta** | **Miss** | **Score** | **Expect** | **Rank** | **Patient1-Art/Control** | **Patient1-Porta/Control** | **Patient1-Hepa/Control** | **Patient2-Art/Control** | **Patient2-Porta/Control** | **Patient2-Hepa/Control** | **Peptide** |
|  | 6351 | **714.44** | **1426.86** | **1426.90** | **-0.04** | **0** | **31** | **0.042** | **1** | **1.121** | **0.955** | **0.583** | **1.038** | **1.381** | **0.792** | **R.IAIDLFK.H** 6350 |
|  | 8593 | **577.02** | **1728.03** | **1728.04** | **-0.02** | **0** | **18** | **1** | **1** | **---** | **---** | **---** | **---** | **---** | **---** | **K.QFPILLDFK.T** |
|  | 17417 | **962.03** | **3844.10** | **3844.04** | **0.06** | **1** | **27** | **0.098** | **1** | **---** | **---** | **---** | **---** | **---** | **---** | **K.GLIKDALENIDPATQMMILNCIYFK.G** 17412 17421 |

  


---

|  |  |
| --- | --- |
| **61.** | P15169    **Mass:** 57959    **Score:** 35     **Queries matched:** 1   **emPAI:** 0.06 |
|  | Carboxypeptidase N catalytic chain OS=Homo sapiens GN=CPN1 PE=1 SV=1 |

|  |  |  |  |  |  |
| --- | --- | --- | --- | --- | --- |
|  | **Quantitation:** | **Ratio** | **Weighted** | **N** | **SD(geo)** |
|  |  | Patient1-Art/Control | --- | 1 | --- |
|  |  | Patient1-Porta/Control | --- | 1 | --- |
|  |  | Patient1-Hepa/Control | --- | 1 | --- |
|  |  | Patient2-Art/Control | --- | 1 | --- |
|  |  | Patient2-Porta/Control | --- | 1 | --- |
|  |  | Patient2-Hepa/Control | --- | 1 | --- |

|  |  |  |  |  |  |  |  |  |  |  |  |  |  |  |  |  |
| --- | --- | --- | --- | --- | --- | --- | --- | --- | --- | --- | --- | --- | --- | --- | --- | --- |
|  | **Query** | **Observed** | **Mr(expt)** | **Mr(calc)** | **Delta** | **Miss** | **Score** | **Expect** | **Rank** | **Patient1-Art/Control** | **Patient1-Porta/Control** | **Patient1-Hepa/Control** | **Patient2-Art/Control** | **Patient2-Porta/Control** | **Patient2-Hepa/Control** | **Peptide** |
|  | 6095 | **695.42** | **1388.83** | **1388.83** | **0.00** | **0** | **35** | **0.023** | **1** | **0.656** | **0.520** | **0.536** | **0.845** | **0.895** | **0.709** | **R.IVQLIQDTR.I** |

  


---

|  |  |
| --- | --- |
| **62.** | O95678    **Mass:** 67968    **Score:** 32     **Queries matched:** 7   **emPAI:** 0.05 |
|  | Keratin, type II cytoskeletal 75 OS=Homo sapiens GN=KRT75 PE=1 SV=2 |

|  |  |  |  |  |  |
| --- | --- | --- | --- | --- | --- |
|  | **Quantitation:** | **Ratio** | **Weighted** | **N** | **SD(geo)** |
|  |  | Patient1-Art/Control | --- | 1 | --- |
|  |  | Patient1-Porta/Control | --- | 1 | --- |
|  |  | Patient1-Hepa/Control | --- | 1 | --- |
|  |  | Patient2-Art/Control | --- | 1 | --- |
|  |  | Patient2-Porta/Control | --- | 1 | --- |
|  |  | Patient2-Hepa/Control | --- | 1 | --- |

|  |  |  |  |  |  |  |  |  |  |  |  |  |  |  |  |  |
| --- | --- | --- | --- | --- | --- | --- | --- | --- | --- | --- | --- | --- | --- | --- | --- | --- |
|  | **Query** | **Observed** | **Mr(expt)** | **Mr(calc)** | **Delta** | **Miss** | **Score** | **Expect** | **Rank** | **Patient1-Art/Control** | **Patient1-Porta/Control** | **Patient1-Hepa/Control** | **Patient2-Art/Control** | **Patient2-Porta/Control** | **Patient2-Hepa/Control** | **Peptide** |
|  | 3443 | 517.81 | 1033.61 | 1033.61 | 0.00 | 0 | 12 | 2.5 | 6 | --- | --- | --- | --- | --- | --- | R.LEAELR.N 3445 |
|  | 10190 | **646.70** | **1937.09** | **1937.13** | **-0.04** | **0** | **32** | **0.038** | **1** | **0.540** | **0.603** | **0.688** | **0.626** | **0.876** | **0.720** | **R.NLDLDSIIAEVK.A** 10189 |
|  | 11494 | 723.06 | 2166.15 | 2166.28 | -0.12 | 2 | 3 | 37 | 7 | --- | --- | --- | --- | --- | --- | R.MIQRLRAEIDSVK.K 11492 |
|  | 14771 | 920.52 | 2758.55 | 2758.51 | 0.04 | 2 | 6 | 15 | 5 | --- | --- | --- | --- | --- | --- | K.QDMARLLREYQELMNIK.L |

  


---

|  |  |
| --- | --- |
| **63.** | P02538    **Mass:** 69669    **Score:** 32     **Queries matched:** 6   **emPAI:** 0.05 |
|  | Keratin, type II cytoskeletal 6A OS=Homo sapiens GN=KRT6A PE=1 SV=3 |

|  |  |  |  |  |  |
| --- | --- | --- | --- | --- | --- |
|  | **Quantitation:** | **Ratio** | **Weighted** | **N** | **SD(geo)** |
|  |  | Patient1-Art/Control | --- | 1 | --- |
|  |  | Patient1-Porta/Control | --- | 1 | --- |
|  |  | Patient1-Hepa/Control | --- | 1 | --- |
|  |  | Patient2-Art/Control | --- | 1 | --- |
|  |  | Patient2-Porta/Control | --- | 1 | --- |
|  |  | Patient2-Hepa/Control | --- | 1 | --- |

|  |  |  |  |  |  |  |  |  |  |  |  |  |  |  |  |  |
| --- | --- | --- | --- | --- | --- | --- | --- | --- | --- | --- | --- | --- | --- | --- | --- | --- |
|  | **Query** | **Observed** | **Mr(expt)** | **Mr(calc)** | **Delta** | **Miss** | **Score** | **Expect** | **Rank** | **Patient1-Art/Control** | **Patient1-Porta/Control** | **Patient1-Hepa/Control** | **Patient2-Art/Control** | **Patient2-Porta/Control** | **Patient2-Hepa/Control** | **Peptide** |
|  | 6835 | **745.41** | **1488.80** | **1488.88** | **-0.08** | **0** | **4** | **21** | **1** | **---** | **---** | **---** | **---** | **---** | **---** | **R.SLYGLGGSK.R** 6845 |
|  | 10190 | 646.70 | 1937.09 | 1937.13 | -0.04 | 0 | 32 | 0.038 | 1 | 0.540 | 0.603 | 0.688 | 0.626 | 0.876 | 0.720 | R.NLDLDSIIAEVK.A 10189 |
|  | 13753 | **840.44** | **2518.29** | **2518.32** | **-0.03** | **1** | **7** | **12** | **1** | **---** | **---** | **---** | **---** | **---** | **---** | **R.LDSELRGMQDLVEDFK.N** 13755 |

  


---

|  |  |
| --- | --- |
| **64.** | P35908    **Mass:** 76575    **Score:** 32     **Queries matched:** 4   **emPAI:** 0.05 |
|  | Keratin, type II cytoskeletal 2 epidermal OS=Homo sapiens GN=KRT2 PE=1 SV=2 |

|  |  |  |  |  |  |
| --- | --- | --- | --- | --- | --- |
|  | **Quantitation:** | **Ratio** | **Weighted** | **N** | **SD(geo)** |
|  |  | Patient1-Art/Control | --- | 1 | --- |
|  |  | Patient1-Porta/Control | --- | 1 | --- |
|  |  | Patient1-Hepa/Control | --- | 1 | --- |
|  |  | Patient2-Art/Control | --- | 1 | --- |
|  |  | Patient2-Porta/Control | --- | 1 | --- |
|  |  | Patient2-Hepa/Control | --- | 1 | --- |

|  |  |  |  |  |  |  |  |  |  |  |  |  |  |  |  |  |
| --- | --- | --- | --- | --- | --- | --- | --- | --- | --- | --- | --- | --- | --- | --- | --- | --- |
|  | **Query** | **Observed** | **Mr(expt)** | **Mr(calc)** | **Delta** | **Miss** | **Score** | **Expect** | **Rank** | **Patient1-Art/Control** | **Patient1-Porta/Control** | **Patient1-Hepa/Control** | **Patient2-Art/Control** | **Patient2-Porta/Control** | **Patient2-Hepa/Control** | **Peptide** |
|  | 3781 | 542.31 | 1082.60 | 1082.58 | 0.02 | 0 | 4 | 37 | 7 | --- | --- | --- | --- | --- | --- | K.AAFGGSGGR.G |
|  | 10190 | 646.70 | 1937.09 | 1937.13 | -0.04 | 0 | 32 | 0.038 | 1 | 0.540 | 0.603 | 0.688 | 0.626 | 0.876 | 0.720 | R.NLDLDSIIAEVK.A 10189 |
|  | 10663 | **409.98** | **2044.85** | **2044.95** | **-0.09** | **0** | **3** | **6.1** | **1** | **---** | **---** | **---** | **---** | **---** | **---** | **R.GGSGGGGSISGGGYGSGGGSGGR.Y** |

  


---

|  |  |
| --- | --- |
| **65.** | P04278    **Mass:** 47890    **Score:** 31     **Queries matched:** 1   **emPAI:** 0.08 |
|  | Sex hormone-binding globulin OS=Homo sapiens GN=SHBG PE=1 SV=2 |

|  |  |  |  |  |  |
| --- | --- | --- | --- | --- | --- |
|  | **Quantitation:** | **Ratio** | **Weighted** | **N** | **SD(geo)** |
|  |  | Patient1-Art/Control | --- | 1 | --- |
|  |  | Patient1-Porta/Control | --- | 1 | --- |
|  |  | Patient1-Hepa/Control | --- | 1 | --- |
|  |  | Patient2-Art/Control | --- | 1 | --- |
|  |  | Patient2-Porta/Control | --- | 1 | --- |
|  |  | Patient2-Hepa/Control | --- | 1 | --- |

|  |  |  |  |  |  |  |  |  |  |  |  |  |  |  |  |  |
| --- | --- | --- | --- | --- | --- | --- | --- | --- | --- | --- | --- | --- | --- | --- | --- | --- |
|  | **Query** | **Observed** | **Mr(expt)** | **Mr(calc)** | **Delta** | **Miss** | **Score** | **Expect** | **Rank** | **Patient1-Art/Control** | **Patient1-Porta/Control** | **Patient1-Hepa/Control** | **Patient2-Art/Control** | **Patient2-Porta/Control** | **Patient2-Hepa/Control** | **Peptide** |
|  | 15629 | **994.27** | **2979.79** | **2979.82** | **-0.03** | **0** | **31** | **0.036** | **1** | **0.328** | **0.297** | **0.624** | **0.766** | **0.928** | **0.927** | **K.VVLSSGSGPGLDLPLVLGLPLQLK.L** |

  


---

|  |  |
| --- | --- |
| **66.** | P02746    **Mass:** 31494    **Score:** 30     **Queries matched:** 5   **emPAI:** 0.12 |
|  | Complement C1q subcomponent subunit B OS=Homo sapiens GN=C1QB PE=1 SV=2 |

|  |  |  |  |  |  |
| --- | --- | --- | --- | --- | --- |
|  | **Quantitation:** | **Ratio** | **Weighted** | **N** | **SD(geo)** |
|  |  | Patient1-Art/Control | --- | 1 | --- |
|  |  | Patient1-Porta/Control | --- | 1 | --- |
|  |  | Patient1-Hepa/Control | --- | 0 | --- |
|  |  | Patient2-Art/Control | --- | 1 | --- |
|  |  | Patient2-Porta/Control | --- | 1 | --- |
|  |  | Patient2-Hepa/Control | --- | 1 | --- |

|  |  |  |  |  |  |  |  |  |  |  |  |  |  |  |  |  |
| --- | --- | --- | --- | --- | --- | --- | --- | --- | --- | --- | --- | --- | --- | --- | --- | --- |
|  | **Query** | **Observed** | **Mr(expt)** | **Mr(calc)** | **Delta** | **Miss** | **Score** | **Expect** | **Rank** | **Patient1-Art/Control** | **Patient1-Porta/Control** | **Patient1-Hepa/Control** | **Patient2-Art/Control** | **Patient2-Porta/Control** | **Patient2-Hepa/Control** | **Peptide** |
|  | 4051 | **558.83** | **1115.65** | **1115.70** | **-0.04** | **0** | **3** | **27** | **1** | **---** | **---** | **---** | **---** | **---** | **---** | **R.TINVPLR.R** |
|  | 14136 | **871.11** | **2610.30** | **2610.42** | **-0.12** | **1** | **2** | **30** | **4** | **---** | **---** | **---** | **---** | **---** | **---** | **K.GGPGAPGAPGPKGESGDYK.A** 14137 |
|  | 15315 | **966.14** | **2895.39** | **2895.40** | **-0.01** | **0** | **30** | **0.04** | **1** | **1.977** | **0.861** | **-0.121** | **1.973** | **0.883** | **0.927** | **K.NSLLGMEGANSIFSGFLLFPDMEA.-** 15316 |

  


---

|  |  |
| --- | --- |
| **67.** | P06396    **Mass:** 99960    **Score:** 30     **Queries matched:** 10   **emPAI:** 0.08 |
|  | Gelsolin OS=Homo sapiens GN=GSN PE=1 SV=1 |

|  |  |  |  |  |  |
| --- | --- | --- | --- | --- | --- |
|  | **Quantitation:** | **Ratio** | **Weighted** | **N** | **SD(geo)** |
|  |  | Patient1-Art/Control | --- | 0 | --- |
|  |  | Patient1-Porta/Control | --- | 0 | --- |
|  |  | Patient1-Hepa/Control | --- | 0 | --- |
|  |  | Patient2-Art/Control | --- | 0 | --- |
|  |  | Patient2-Porta/Control | --- | 0 | --- |
|  |  | Patient2-Hepa/Control | --- | 0 | --- |

|  |  |  |  |  |  |  |  |  |  |  |  |  |  |  |  |  |
| --- | --- | --- | --- | --- | --- | --- | --- | --- | --- | --- | --- | --- | --- | --- | --- | --- |
|  | **Query** | **Observed** | **Mr(expt)** | **Mr(calc)** | **Delta** | **Miss** | **Score** | **Expect** | **Rank** | **Patient1-Art/Control** | **Patient1-Porta/Control** | **Patient1-Hepa/Control** | **Patient2-Art/Control** | **Patient2-Porta/Control** | **Patient2-Hepa/Control** | **Peptide** |
|  | 2547 | **483.78** | **965.54** | **965.60** | **-0.05** | **0** | **0** | **45** | **10** | **---** | **---** | **---** | **---** | **---** | **---** | **R.LFQVR.A** |
|  | 5910 | **683.44** | **1364.86** | **1364.89** | **-0.02** | **0** | **6** | **16** | **1** | **---** | **---** | **---** | **---** | **---** | **---** | **R.TPITVVK.Q** |
|  | 6062 | 691.84 | 1381.66 | 1381.71 | -0.05 | 0 | 12 | 3.7 | 2 | --- | --- | --- | --- | --- | --- | R.YIETDPANR.D 6063 6064 6067 6068 |
|  | 13138 | **813.43** | **2437.28** | **2437.37** | **-0.09** | **0** | **30** | **0.059** | **1** | **---** | **---** | **---** | **---** | **---** | **---** | **K.QTQVSVLPEGGETPLFK.Q** 13137 |
|  | 16195 | **1029.84** | **3086.51** | **3086.62** | **-0.11** | **0** | **15** | **1.3** | **1** | **---** | **---** | **---** | **---** | **---** | **---** | **K.VSNGAGTMSVSLVADENPFAQGALK.S** |

  


---

|  |
| --- |
| **Mascot:**  http://www.matrixscience.com/ |

|  |  |
| --- | --- |
| |  | | --- | | Top scoring peptide matches to query 30 24: Sum of 4 scans in range 158 (rt=12.318, f=2, i=35) to 176 (rt=13.214, f=2, i=38) [\\172.16.3.18\masslynx\2009.PRO\Data\20090522\_17\_qdda.raw] Score greater than 19 indicates homology Score greater than 29 indicates identity  ``` Score    Expect   Delta  Hit  Protein Peptide   9.3       4.9   -0.08    2   P01023 K.GGIVR.T   5.7        11   -0.01               GGPDR   5.7        11   -0.08               R.GGVLR.S   2.6        23   -0.08               R.GAVVR.A   2.6        23   -0.08               R.GIGVR.R   2.6        23   -0.08               GLGVR   2.6        23   -0.08               GVAVR ``` | |

|  |  |
| --- | --- |
| |  | | --- | | Top scoring peptide matches to query 32 12: Sum of 4 scans in range 158 (rt=12.2631, f=3, i=29) to 176 (rt=13.1592, f=3, i=32) [\\172.16.3.18\masslynx\2009.PRO\Data\20090526\_19\_qdda.raw] Score greater than 16 indicates homology Score greater than 29 indicates identity  ``` Score    Expect   Delta  Hit  Protein Peptide   3.5        19   -0.07    2   P01023 K.GGIVR.T ``` | |

|  |  |
| --- | --- |
| |  | | --- | | Top scoring peptide matches to query 34 15: Sum of 8 scans in range 177 (rt=13.1813, f=3, i=29) to 222 (rt=15.4085, f=5, i=14) [\\172.16.3.18\masslynx\2009.PRO\Data\20090526\_13\_qdda.raw] Score greater than 18 indicates homology Score greater than 29 indicates identity  ``` Score    Expect   Delta  Hit  Protein Peptide  10.5       3.7   -0.05    2   P01023 K.GGIVR.T   5.1        13    0.03               GGPDR   5.1        13   -0.05               R.GGVLR.S   1.5        30   -0.05               R.GIGVR.R   1.5        30   -0.05               GLGVR   1.1        33   -0.05               R.GAVVR.A   1.1        33   -0.05               GVAVR ``` | |

|  |  |
| --- | --- |
| |  | | --- | | Top scoring peptide matches to query 35 23: Sum of 4 scans in range 173 (rt=13.0109, f=2, i=28) to 191 (rt=13.907, f=2, i=31) [\\172.16.3.18\masslynx\2009.PRO\Data\20090525\_13\_qdda.raw] Score greater than 20 indicates homology Score greater than 29 indicates identity  ``` Score    Expect   Delta  Hit  Protein Peptide   7.2       8.1   -0.05    2   P01023 K.GGIVR.T   7.2       8.1    0.03               GGPDR   7.2       8.1   -0.05               R.GGVLR.S ``` | |

|  |  |
| --- | --- |
| |  | | --- | | Top scoring peptide matches to query 37 13: Sum of 6 scans in range 180 (rt=13.2512, f=3, i=23) to 215 (rt=14.9805, f=5, i=10) [\\172.16.3.18\masslynx\2009.PRO\Data\20090530\_24\_qdda.raw] Score greater than 19 indicates homology Score greater than 29 indicates identity  ``` Score    Expect   Delta  Hit  Protein Peptide   6.6       9.3   -0.02    2   P01023 K.GGIVR.T   6.6       9.3    0.06               GGPDR   6.6       9.3   -0.02               R.GGVLR.S ``` | |

|  |  |
| --- | --- |
| |  | | --- | | Top scoring peptide matches to query 482 25: Sum of 4 scans in range 176 (rt=13.1197, f=6, i=5) to 193 (rt=13.9659, f=6, i=8) [\\172.16.3.18\masslynx\2009.PRO\Data\20090529\_24\_qdda.raw] Score greater than 18 indicates homology Score greater than 31 indicates identity  ``` Score    Expect   Delta  Hit  Protein Peptide   5.7        17    0.03               R.EPSGR.W   5.3        19   -0.01               K.AEIGR.R   5.3        19   -0.01               AELGR   4.6        22   -0.01   38   P00734 AIEGR   4.6        22   -0.01               R.ALEGR.-   3.8        26   -0.01               ALGER   2.4        37   -0.01               EAIGR   2.4        37   -0.01               EALGR   1.9        42   -0.01               ELAGR   1.9        42    0.03               K.ESPGR.W ``` | |

|  |  |
| --- | --- |
| |  | | --- | | Top scoring peptide matches to query 485 21: Sum of 2 scans in range 159 (rt=12.3172, f=4, i=7) to 165 (rt=12.6159, f=4, i=8) [\\172.16.3.18\masslynx\2009.PRO\Data\20090522\_13\_qdda.raw] Score greater than 19 indicates homology Score greater than 31 indicates identity  ``` Score    Expect   Delta  Hit  Protein Peptide  10.6       5.6   -0.04    1   P01024 TVAVR   5.8        17   -0.01               AEAVR   5.8        17   -0.01               EAAVR   5.8        17   -0.04               R.ISAVR.A   5.8        17   -0.04               LSAVR   3.9        26   -0.04               K.TVGLR.E   3.2        31   -0.01               K.AEIGR.R   3.2        31   -0.01               AELGR   1.4        47   -0.01               EAIGR   1.4        47   -0.01               EALGR ``` | |

|  |  |
| --- | --- |
| |  | | --- | | Top scoring peptide matches to query 486 22: Sum of 4 scans in range 172 (rt=12.9229, f=2, i=43) to 188 (rt=13.7194, f=2, i=46) [\\172.16.3.18\masslynx\2009.PRO\Data\20090525\_\_04\_qdda.raw] Score greater than 22 indicates homology Score greater than 31 indicates identity  ``` Score    Expect   Delta  Hit  Protein Peptide  14.7       2.2   -0.04    1   P01024 TVAVR   9.1       7.8   -0.04               K.TVGLR.E   7.8        11   -0.04               R.ISAVR.A   7.8        11   -0.04               LSAVR   7.0        13   -0.04               R.TAVVR.G   6.6        14   -0.00               K.TATPR.A   6.6        14   -0.00               K.TTAPR.R   6.1        16   -0.00               EAAVR   4.5        23   -0.04               TGLVR   4.5        23   -0.04               K.TLGVR.H ``` | |

|  |  |
| --- | --- |
| |  | | --- | | Top scoring peptide matches to query 487 32: Sum of 4 scans in range 178 (rt=13.2718, f=3, i=22) to 196 (rt=14.1678, f=3, i=25) [\\172.16.3.18\masslynx\2009.PRO\Data\20090525\_10\_qdda.raw] Score greater than 18 indicates homology Score greater than 31 indicates identity  ``` Score    Expect   Delta  Hit  Protein Peptide   8.1       9.8    0.01               K.AEIGR.R   8.1       9.8    0.01               AELGR   5.2        19   -0.03    1   P01024 TVAVR   5.0        20    0.01               EAIGR   5.0        20    0.01               EALGR   3.2        31   -0.03               K.ISLGR.N   3.2        31   -0.03               R.LSLGR.I   3.2        31   -0.03               K.SIIGR.L   3.2        31   -0.03               K.SLIGR.S   3.2        31   -0.03               SLLGR ``` | |

|  |  |
| --- | --- |
| |  | | --- | | Top scoring peptide matches to query 488 8: Sum of 3 scans in range 172 (rt=12.7906, f=2, i=44) to 178 (rt=13.0892, f=2, i=45) [\\172.16.3.18\masslynx\2009.PRO\Data\20090528\_06\_qdda.raw] Score greater than 25 indicates homology Score greater than 31 indicates identity  ``` Score    Expect   Delta  Hit  Protein Peptide  18.5      0.89   -0.01    1   P01024 TVAVR  11.9       4.1   -0.01               R.TAVVR.G  11.1         5   -0.01               K.TVGLR.E   8.3       9.5    0.07               GPSER   7.3        12    0.03               AEAVR   7.3        12    0.03               EAAVR   7.3        12   -0.01               R.ISAVR.A   7.3        12   -0.01               LSAVR   6.4        15   -0.01               TGLVR   6.4        15   -0.01               K.TLGVR.H ``` | |

|  |  |
| --- | --- |
| |  | | --- | | Top scoring peptide matches to query 956 29: Sum of 4 scans in range 265 (rt=17.3583, f=2, i=54) to 283 (rt=18.2544, f=2, i=57) [\\172.16.3.18\masslynx\2009.PRO\Data\20090530\_12\_qdda.raw] Score greater than 21 indicates homology Score greater than 29 indicates identity  ``` Score    Expect   Delta  Hit  Protein Peptide  14.3       1.8   -0.11   16   P00751 R.GLTLR.G   7.5       8.4   -0.11               K.IGTLR.S   7.5       8.4   -0.11               LGTIR   7.5       8.4   -0.11               LGTLR   6.6        11   -0.11               AVTLR   4.2        18   -0.08               GLVDR   3.9        20   -0.08               GIDVR   3.9        20   -0.11               GLLTR   3.3        23   -0.11               R.GTILR.C   3.3        23   -0.11               GTLIR ``` | |

|  |  |
| --- | --- |
| |  | | --- | | Top scoring peptide matches to query 957 28: Sum of 4 scans in range 244 (rt=16.5402, f=3, i=28) to 262 (rt=17.4363, f=3, i=31) [\\172.16.3.18\masslynx\2009.PRO\Data\20090522\_25\_qdda.raw] Score greater than 18 indicates homology Score greater than 29 indicates identity  ``` Score    Expect   Delta  Hit  Protein Peptide   9.1       5.8   -0.08   16   P00751 R.GLTLR.G   5.2        15   -0.08               K.IGTLR.S   5.2        15   -0.08               LGTIR   5.2        15   -0.08               LGTLR   3.7        20   -0.04               GIDVR   3.7        20   -0.08               GLLTR   3.7        20   -0.04               GLVDR   1.6        33   -0.08               AVTLR ``` | |

|  |  |
| --- | --- |
| |  | | --- | | Top scoring peptide matches to query 958 29: Sum of 4 scans in range 239 (rt=16.2567, f=3, i=41) to 257 (rt=17.1527, f=3, i=44) [\\172.16.3.18\masslynx\2009.PRO\Data\20090526\_19\_qdda.raw] Score greater than 19 indicates homology Score greater than 29 indicates identity  ``` Score    Expect   Delta  Hit  Protein Peptide   7.1       9.2   -0.06   16   P00751 R.GLTLR.G   6.0        12   -0.02               GIDVR   6.0        12   -0.06               GLLTR   6.0        12   -0.02               GLVDR   3.9        20   -0.06               K.IGTLR.S   3.9        20   -0.06               LGTIR   3.9        20   -0.06               LGTLR   3.6        21   -0.06               AVTLR ``` | |

|  |  |
| --- | --- |
| |  | | --- | | Top scoring peptide matches to query 964 28: Sum of 3 scans in range 262 (rt=17.2953, f=3, i=33) to 274 (rt=17.8927, f=3, i=35) [\\172.16.3.18\masslynx\2009.PRO\Data\20090530\_21\_qdda.raw] Score greater than 19 indicates homology Score greater than 29 indicates identity  ``` Score    Expect   Delta  Hit  Protein Peptide   8.9       6.2   -0.02   16   P00751 R.GLTLR.G   6.7        10    0.01               GIDVR   6.7        10   -0.02               GLLTR   6.7        10    0.01               GLVDR   5.8        13   -0.02               AVTLR   5.8        13   -0.02               K.IGTLR.S   5.8        13   -0.02               LGTIR   5.8        13   -0.02               LGTLR ``` | |

|  |  |
| --- | --- |
| |  | | --- | | Top scoring peptide matches to query 965 36: Sum of 8 scans in range 416 (rt=25.1368, f=4, i=45) to 458 (rt=27.2276, f=4, i=52) [\\172.16.3.18\masslynx\2009.PRO\Data\20090531\_05\_qdda.raw] Score greater than 19 indicates homology Score greater than 29 indicates identity  ``` Score    Expect   Delta  Hit  Protein Peptide   8.5       6.8   -0.02   16   P00751 R.GLTLR.G   6.2        11    0.02               GIDVR   6.2        11   -0.02               GLLTR   6.2        11    0.02               GLVDR   5.4        14   -0.02               AVTLR   5.4        14   -0.02               K.IGTLR.S   5.4        14   -0.02               LGTIR   5.4        14   -0.02               LGTLR ``` | |

|  |  |
| --- | --- |
| |  | | --- | | Top scoring peptide matches to query 966 34: Sum of 2 scans in range 253 (rt=16.8617, f=4, i=23) to 259 (rt=17.1604, f=4, i=24) [\\172.16.3.18\masslynx\2009.PRO\Data\20090528\_15\_qdda.raw] Score greater than 17 indicates homology Score greater than 29 indicates identity  ``` Score    Expect   Delta  Hit  Protein Peptide   6.4        11   -0.02   16   P00751 R.GLTLR.G   4.6        16    0.02               GIDVR   4.6        16   -0.02               GLLTR   4.6        16    0.02               GLVDR   2.9        25   -0.02               AVTLR   2.9        25   -0.02               K.IGTLR.S   2.9        25   -0.02               LGTIR   2.9        25   -0.02               LGTLR ``` | |

|  |  |
| --- | --- |
| |  | | --- | | Top scoring peptide matches to query 968 36: Sum of 3 scans in range 287 (rt=18.5125, f=3, i=42) to 297 (rt=19.0103, f=3, i=44) [\\172.16.3.18\masslynx\2009.PRO\Data\20090530\_24\_qdda.raw] Score greater than 21 indicates homology Score greater than 29 indicates identity  ``` Score    Expect   Delta  Hit  Protein Peptide  13.7         2   -0.01   16   P00751 R.GLTLR.G   7.8       7.9   -0.01               K.IGTLR.S   7.8       7.9   -0.01               LGTIR   7.8       7.9   -0.01               LGTLR   6.8        10   -0.01               AVTLR   5.3        14   -0.01               R.GTILR.C   5.3        14   -0.01               GTLIR   5.3        14   -0.01               GTLLR   4.5        17    0.03               GIDVR   4.5        17   -0.01               GLLTR ``` | |

|  |  |
| --- | --- |
| |  | | --- | | Top scoring peptide matches to query 975 32: Scan 285 (rt=18.1661, f=4, i=10) [\\172.16.3.18\masslynx\2009.PRO\Data\20090530\_30\_qdda.raw] Score greater than 14 indicates homology Score greater than 29 indicates identity  ``` Score    Expect   Delta  Hit  Protein Peptide   1.9        31    0.01   16   P00751 R.GLTLR.G ``` | |

|  |  |
| --- | --- |
| |  | | --- | | Top scoring peptide matches to query 1257 27: Sum of 4 scans in range 191 (rt=13.9915, f=6, i=9) to 209 (rt=14.888, f=6, i=12) [\\172.16.3.18\masslynx\2009.PRO\Data\20090522\_33\_qdda.raw] Score greater than 26 indicates homology Score greater than 30 indicates identity  ``` Score    Expect   Delta  Hit  Protein Peptide  18.7      0.77   -0.10   14   P04217 DAVLR  12.6       3.1   -0.10               DLGLR  12.6       3.1   -0.10               R.DVALR.C   7.4        10   -0.02               DADPR   7.4        10   -0.10               K.DAIVR.A   7.4        10   -0.10               DALVR   5.6        15   -0.10               R.EGVIR.Y   5.6        15   -0.10               R.EGVLR.T   5.6        15   -0.10               GEVIR   5.6        15   -0.10               GEVLR ``` | |

|  |  |
| --- | --- |
| |  | | --- | | Top scoring peptide matches to query 1258 28: Sum of 4 scans in range 205 (rt=14.5132, f=3, i=24) to 223 (rt=15.4093, f=3, i=27) [\\172.16.3.18\masslynx\2009.PRO\Data\20090529\_12\_qdda.raw] Score greater than 26 indicates homology Score greater than 30 indicates identity  ``` Score    Expect   Delta  Hit  Protein Peptide  18.6      0.78   -0.10   14   P04217 DAVLR  12.5       3.2   -0.10               DLGLR  12.5       3.2   -0.10               R.DVALR.C   7.4        10   -0.02               DADPR   7.4        10   -0.10               K.DAIVR.A   7.4        10   -0.10               DALVR   5.6        16   -0.10               R.EGVIR.Y   5.6        16   -0.10               R.EGVLR.T   5.6        16   -0.10               GEVIR   5.6        16   -0.10               GEVLR ``` | |

|  |  |
| --- | --- |
| |  | | --- | | Top scoring peptide matches to query 1262 27: Sum of 4 scans in range 199 (rt=14.1917, f=4, i=9) to 217 (rt=15.0879, f=4, i=12) [\\172.16.3.18\masslynx\2009.PRO\Data\20090528\_24\_qdda.raw] Score greater than 26 indicates homology Score greater than 30 indicates identity  ``` Score    Expect   Delta  Hit  Protein Peptide  18.3      0.85   -0.06   14   P04217 DAVLR  12.2       3.4   -0.06               DLGLR  12.2       3.4   -0.06               R.DVALR.C   7.1        11    0.01               DADPR   7.1        11   -0.06               K.DAIVR.A   7.1        11   -0.06               DALVR   5.2        17   -0.06               R.EGVIR.Y   5.2        17   -0.06               R.EGVLR.T   5.2        17   -0.06               GEVIR   5.2        17   -0.06               GEVLR ``` | |

|  |  |
| --- | --- |
| |  | | --- | | Top scoring peptide matches to query 1263 27: Sum of 4 scans in range 206 (rt=14.5762, f=6, i=9) to 224 (rt=15.4722, f=6, i=12) [\\172.16.3.18\masslynx\2009.PRO\Data\20090526\_22\_qdda.raw] Score greater than 25 indicates homology Score greater than 30 indicates identity  ``` Score    Expect   Delta  Hit  Protein Peptide  18.1      0.89   -0.06   14   P04217 DAVLR  12.0       3.6   -0.06               DLGLR  12.0       3.6   -0.06               R.DVALR.C   6.9        12    0.01               DADPR   6.9        12   -0.06               K.DAIVR.A   6.9        12   -0.06               DALVR   5.4        16    0.01               DGPER   5.1        17   -0.06               R.EGVIR.Y   5.1        17   -0.06               R.EGVLR.T   5.1        17   -0.06               GEVIR ``` | |

|  |  |
| --- | --- |
| |  | | --- | | Top scoring peptide matches to query 1264 22: Sum of 4 scans in range 208 (rt=14.6623, f=5, i=9) to 226 (rt=15.5583, f=5, i=12) [\\172.16.3.18\masslynx\2009.PRO\Data\20090525\_22\_qdda.raw] Score greater than 26 indicates homology Score greater than 30 indicates identity  ``` Score    Expect   Delta  Hit  Protein Peptide  18.2      0.85   -0.06   14   P04217 DAVLR  12.1       3.5   -0.06               DLGLR  12.1       3.5   -0.06               R.DVALR.C   7.0        11    0.01               DADPR   7.0        11   -0.06               K.DAIVR.A   7.0        11   -0.06               DALVR   5.3        17   -0.06               R.EGVIR.Y   5.3        17   -0.06               R.EGVLR.T   5.3        17   -0.06               GEVIR   5.3        17   -0.06               GEVLR ``` | |

|  |  |
| --- | --- |
| |  | | --- | | Top scoring peptide matches to query 1266 24: Sum of 5 scans in range 215 (rt=14.8962, f=7, i=11) to 234 (rt=15.8349, f=7, i=15) [\\172.16.3.18\masslynx\2009.PRO\Data\20090525\_25\_qdda.raw] Score greater than 21 indicates homology Score greater than 30 indicates identity  ``` Score    Expect   Delta  Hit  Protein Peptide  13.3       2.7   -0.05   14   P04217 DAVLR   7.6       9.9   -0.05               DLGLR   7.6       9.9   -0.05               R.DVALR.C   5.2        17    0.02               DADPR   5.2        17   -0.05               K.DAIVR.A   5.2        17   -0.05               DALVR   3.4        26    0.02               DGPER   2.2        34   -0.05               GEVIR   2.2        34   -0.05               GEVLR   2.1        35   -0.05               R.EGVIR.Y ``` | |

|  |  |
| --- | --- |
| |  | | --- | | Top scoring peptide matches to query 1267 35: Sum of 4 scans in range 212 (rt=14.9802, f=3, i=27) to 230 (rt=15.8762, f=3, i=30) [\\172.16.3.18\masslynx\2009.PRO\Data\20090522\_17\_qdda.raw] Score greater than 18 indicates homology Score greater than 30 indicates identity  ``` Score    Expect   Delta  Hit  Protein Peptide   7.8       9.5   -0.05   14   P04217 DAVLR   5.0        18   -0.05               K.DAIVR.A   5.0        18   -0.05               DALVR   3.4        26   -0.05               DLGLR   3.4        26   -0.05               R.DVALR.C   1.3        42    0.02               DADPR ``` | |

|  |  |
| --- | --- |
| |  | | --- | | Top scoring peptide matches to query 1270 21: Sum of 4 scans in range 207 (rt=14.6335, f=6, i=9) to 225 (rt=15.5296, f=6, i=12) [\\172.16.3.18\masslynx\2009.PRO\Data\20090529\_18\_qdda.raw] Score greater than 23 indicates homology Score greater than 30 indicates identity  ``` Score    Expect   Delta  Hit  Protein Peptide  16.1       1.4   -0.04   14   P04217 DAVLR   9.9       5.8   -0.04               DLGLR   9.9       5.8   -0.04               R.DVALR.C   6.6        12    0.03               DADPR   6.6        12   -0.04               K.DAIVR.A   6.6        12   -0.04               DALVR   5.1        18   -0.04               R.EGVIR.Y   5.1        18   -0.04               R.EGVLR.T   5.1        18   -0.04               GEVIR   5.1        18   -0.04               GEVLR ``` | |

|  |  |
| --- | --- |
| |  | | --- | | Top scoring peptide matches to query 1271 28: Sum of 5 scans in range 232 (rt=15.8723, f=7, i=16) to 251 (rt=16.8109, f=7, i=20) [\\172.16.3.18\masslynx\2009.PRO\Data\20090529\_21\_qdda.raw] Score greater than 15 indicates homology Score greater than 30 indicates identity  ``` Score    Expect   Delta  Hit  Protein Peptide   3.9        23    0.03               DGPER   2.0        36   -0.04   14   P04217 DAVLR   1.5        40   -0.04               GEVIR   1.5        40   -0.04               GEVLR ``` | |

|  |  |
| --- | --- |
| |  | | --- | | Top scoring peptide matches to query 1275 24: Sum of 4 scans in range 208 (rt=14.7026, f=4, i=24) to 226 (rt=15.5987, f=4, i=27) [\\172.16.3.18\masslynx\2009.PRO\Data\20090526\_16\_qdda.raw] Score greater than 26 indicates homology Score greater than 30 indicates identity  ``` Score    Expect   Delta  Hit  Protein Peptide  20.2      0.54   -0.03   14   P04217 DAVLR  12.4       3.3   -0.03               DLGLR  12.4       3.3   -0.03               R.DVALR.C   9.3       6.6   -0.03               R.EGVIR.Y   9.3       6.6   -0.03               R.EGVLR.T   9.3       6.6   -0.03               GEVIR   9.3       6.6   -0.03               GEVLR   9.3       6.6   -0.07               R.SVVIR.T   9.3       6.6   -0.07               SVVLR   5.9        15    0.04               DADPR ``` | |

|  |  |
| --- | --- |
| |  | | --- | | Top scoring peptide matches to query 1281 23: Sum of 4 scans in range 203 (rt=14.4343, f=6, i=9) to 221 (rt=15.3303, f=6, i=12) [\\172.16.3.18\masslynx\2009.PRO\Data\20090528\_18\_qdda.raw] Score greater than 25 indicates homology Score greater than 30 indicates identity  ``` Score    Expect   Delta  Hit  Protein Peptide  17.7      0.96   -0.01   14   P04217 DAVLR  11.7       3.9   -0.01               DLGLR  11.7       3.9   -0.01               R.DVALR.C   6.5        13    0.06               DADPR   6.5        13   -0.01               K.DAIVR.A   6.5        13   -0.01               DALVR   5.0        18   -0.01               R.EGVIR.Y   5.0        18   -0.01               R.EGVLR.T   5.0        18   -0.01               GEVIR   5.0        18   -0.01               GEVLR ``` | |

|  |  |
| --- | --- |
| |  | | --- | | Top scoring peptide matches to query 1282 26: Sum of 4 scans in range 218 (rt=15.1521, f=3, i=38) to 236 (rt=16.0482, f=3, i=41) [\\172.16.3.18\masslynx\2009.PRO\Data\20090530\_18\_qdda.raw] Score greater than 17 indicates homology Score greater than 30 indicates identity  ``` Score    Expect   Delta  Hit  Protein Peptide   9.9       5.8   -0.01   14   P04217 DAVLR   4.2        21   -0.01               DLGLR   4.2        21   -0.01               R.DVALR.C   3.7        24    0.06               DADPR   3.7        24   -0.01               K.DAIVR.A   3.7        24   -0.01               DALVR   2.1        35   -0.01               GEVIR   2.1        35   -0.01               GEVLR   1.1        44   -0.01               R.EGVIR.Y   1.1        44   -0.01               R.EGVLR.T ``` | |

|  |  |
| --- | --- |
| |  | | --- | | Top scoring peptide matches to query 1283 22: Sum of 2 scans in range 224 (rt=15.4156, f=2, i=41) to 230 (rt=15.7142, f=2, i=42) [\\172.16.3.18\masslynx\2009.PRO\Data\20090530\_24\_qdda.raw] Score greater than 21 indicates homology Score greater than 30 indicates identity  ``` Score    Expect   Delta  Hit  Protein Peptide  14.8       1.9   -0.00   14   P04217 DAVLR   7.9       9.1   -0.00               DLGLR   7.9       9.1   -0.00               R.DVALR.C   5.4        16    0.07               DADPR   4.5        20   -0.00               K.DAIVR.A   4.5        20   -0.00               DALVR   2.9        29   -0.00               R.EGVIR.Y   2.9        29   -0.00               R.EGVLR.T   2.9        29   -0.00               GEVIR   2.9        29   -0.00               GEVLR ``` | |

|  |  |
| --- | --- |
| |  | | --- | | Top scoring peptide matches to query 1531 53: Sum of 4 scans in range 315 (rt=19.9377, f=6, i=27) to 333 (rt=20.8337, f=6, i=30) [\\172.16.3.18\masslynx\2009.PRO\Data\20090529\_12\_qdda.raw] Score greater than 17 indicates homology Score greater than 27 indicates identity  ``` Score    Expect   Delta  Hit  Protein Peptide   5.0       9.6   -0.05               K.GAVAIR.M   4.0        12   -0.05               K.INALR.A   4.0        12   -0.05   40   P27169 LNALR   2.1        19   -0.01               R.APTAAR.A   2.0        19   -0.06               ARALR   0.4        27   -0.05               QVALR   0.4        28   -0.05               K.GAAVIR.S   0.4        28   -0.05               R.GAAVLR.R   0.4        28   -0.05               R.GAIGLR.I ``` | |

|  |  |
| --- | --- |
| |  | | --- | | Top scoring peptide matches to query 1582 16: Sum of 4 scans in range 180 (rt=13.286, f=4, i=13) to 198 (rt=14.182, f=4, i=16) [\\172.16.3.18\masslynx\2009.PRO\Data\20090529\_15\_qdda.raw] Score greater than 19 indicates homology Score greater than 28 indicates identity  ``` Score    Expect   Delta  Hit  Protein Peptide  11.9       2.4   -0.06               R.IDMGR.F  11.9       2.4   -0.06               R.LDGMR.M  11.9       2.4   -0.07               LDSTR  11.9       2.4   -0.07   20   P02790 R.LDTSR.D   5.8       9.9   -0.07               R.DITSR.K   5.8       9.9   -0.07               K.DLTSR.V   5.7        10   -0.07               M.DISTR.S   5.7        10   -0.07               K.DLSTR.S   5.7        10   -0.07               R.EVSTR.F   5.7        10   -0.07               K.EVTSR.A ``` | |

|  |  |
| --- | --- |
| |  | | --- | | Top scoring peptide matches to query 1583 17: Sum of 4 scans in range 176 (rt=13.1103, f=3, i=18) to 193 (rt=13.9565, f=3, i=21) [\\172.16.3.18\masslynx\2009.PRO\Data\20090529\_21\_qdda.raw] Score greater than 21 indicates homology Score greater than 28 indicates identity  ``` Score    Expect   Delta  Hit  Protein Peptide  15.3       1.1   -0.06               R.IDMGR.F  15.3       1.1   -0.06               R.LDGMR.M  15.3       1.1   -0.07               LDSTR  15.3       1.1   -0.07   20   P02790 R.LDTSR.D   8.3       5.5   -0.07               M.DISTR.S   8.3       5.5   -0.07               R.DITSR.K   8.3       5.5   -0.07               K.DLSTR.S   8.3       5.5   -0.07               K.DLTSR.V   8.3       5.5   -0.07               R.EVSTR.F   8.3       5.5   -0.07               K.EVTSR.A ``` | |

|  |  |
| --- | --- |
| |  | | --- | | Top scoring peptide matches to query 1584 18: Sum of 4 scans in range 162 (rt=12.5152, f=6, i=6) to 180 (rt=13.4112, f=6, i=9) [\\172.16.3.18\masslynx\2009.PRO\Data\20090522\_21\_qdda.raw] Score greater than 14 indicates homology Score greater than 28 indicates identity  ``` Score    Expect   Delta  Hit  Protein Peptide   4.8        12   -0.05               R.GQSGSR.S   4.7        13   -0.07               M.DISTR.S   4.7        13   -0.07               R.DITSR.K   4.7        13   -0.07               K.DLSTR.S   4.7        13   -0.07               K.DLTSR.V   1.5        27   -0.07   20   P02790 R.LDTSR.D   1.2        28   -0.05               M.GNSASR.N ``` | |

|  |  |
| --- | --- |
| |  | | --- | | Top scoring peptide matches to query 1585 15: Sum of 4 scans in range 182 (rt=13.3436, f=4, i=7) to 200 (rt=14.2397, f=4, i=10) [\\172.16.3.18\masslynx\2009.PRO\Data\20090530\_15\_qdda.raw] Score greater than 19 indicates homology Score greater than 28 indicates identity  ``` Score    Expect   Delta  Hit  Protein Peptide  11.7       2.5   -0.03               R.IDMGR.F  11.7       2.5   -0.03               R.LDGMR.M  11.7       2.5   -0.05               LDSTR  11.7       2.5   -0.05   20   P02790 R.LDTSR.D   5.5        11   -0.05               M.DISTR.S   5.5        11   -0.05               R.DITSR.K   5.5        11   -0.05               K.DLSTR.S   5.5        11   -0.05               K.DLTSR.V   5.5        11   -0.05               R.EVSTR.F   5.5        11   -0.05               K.EVTSR.A ``` | |

|  |  |
| --- | --- |
| |  | | --- | | Top scoring peptide matches to query 1586 18: Sum of 4 scans in range 180 (rt=13.3307, f=6, i=5) to 196 (rt=14.1272, f=6, i=8) [\\172.16.3.18\masslynx\2009.PRO\Data\20090526\_13\_qdda.raw] Score greater than 22 indicates homology Score greater than 28 indicates identity  ``` Score    Expect   Delta  Hit  Protein Peptide  10.3       3.5   -0.04   20   P02790 R.LDTSR.D   8.9       4.9   -0.04               LDSTR   7.3       7.1   -0.03               R.IDMGR.F   7.3       7.1   -0.03               R.LDGMR.M   6.1       9.2   -0.02               R.GSGAGSR.W   1.7        25   -0.02               K.GSQSGR.H ``` | |

|  |  |
| --- | --- |
| |  | | --- | | Top scoring peptide matches to query 1587 15: Sum of 4 scans in range 182 (rt=13.3518, f=3, i=22) to 200 (rt=14.2479, f=3, i=25) [\\172.16.3.18\masslynx\2009.PRO\Data\20090530\_21\_qdda.raw] Score greater than 22 indicates homology Score greater than 28 indicates identity  ``` Score    Expect   Delta  Hit  Protein Peptide  11.1       2.9   -0.04   20   P02790 R.LDTSR.D   8.9       4.8   -0.02               R.IDMGR.F   8.9       4.8   -0.02               R.LDGMR.M   8.9       4.8   -0.04               LDSTR   5.2        11   -0.04               R.DITSR.K   5.2        11   -0.04               K.DLTSR.V   5.0        12   -0.04               K.EVTSR.A   5.0        12   -0.04               VETSR   2.7        20   -0.02               R.GGQSSR.G   2.6        21   -0.02               R.NGASSR.N ``` | |

|  |  |
| --- | --- |
| |  | | --- | | Top scoring peptide matches to query 1588 17: Sum of 4 scans in range 176 (rt=13.0674, f=4, i=11) to 192 (rt=13.8639, f=4, i=14) [\\172.16.3.18\masslynx\2009.PRO\Data\20090528\_15\_qdda.raw] Score greater than 21 indicates homology Score greater than 28 indicates identity  ``` Score    Expect   Delta  Hit  Protein Peptide   8.7       5.1   -0.01               R.GSGAGSR.W   8.0         6   -0.02               R.IDMGR.F   8.0         6   -0.02               R.LDGMR.M   8.0         6   -0.03               LDSTR   8.0         6   -0.03   20   P02790 R.LDTSR.D   7.4       6.9   -0.03               R.DITSR.K   7.4       6.9   -0.03               K.DLTSR.V   6.0       9.5   -0.03               M.DISTR.S   6.0       9.5   -0.03               K.DLSTR.S   1.4        27   -0.03               DTISR ``` | |

|  |  |
| --- | --- |
| |  | | --- | | Top scoring peptide matches to query 1590 16: Sum of 8 scans in range 224 (rt=15.6003, f=4, i=13) to 266 (rt=17.6912, f=4, i=20) [\\172.16.3.18\masslynx\2009.PRO\Data\20090531\_05\_qdda.raw] Score greater than 22 indicates homology Score greater than 28 indicates identity  ``` Score    Expect   Delta  Hit  Protein Peptide   9.6       4.1   -0.03               LDSTR   8.6       5.2   -0.01               R.GSGAGSR.W   7.7       6.4   -0.03   20   P02790 R.LDTSR.D   7.4       6.8   -0.01               R.IDMGR.F   7.4       6.8   -0.01               R.LDGMR.M   7.3         7   -0.01               R.GQSGSR.S   5.1        12   -0.03               R.DITSR.K   5.1        12   -0.03               K.DLTSR.V   3.6        16   -0.03               M.DISTR.S   3.6        16   -0.03               K.DLSTR.S ``` | |

|  |  |
| --- | --- |
| |  | | --- | | Top scoring peptide matches to query 1591 28: Sum of 5 scans in range 178 (rt=13.2598, f=7, i=3) to 196 (rt=14.1487, f=7, i=7) [\\172.16.3.18\masslynx\2009.PRO\Data\20090525\_13\_qdda.raw] Score greater than 15 indicates homology Score greater than 28 indicates identity  ``` Score    Expect   Delta  Hit  Protein Peptide   6.3       8.8   -0.03   20   P02790 R.LDTSR.D   2.5        21    0.00               R.GSGAGSR.W   2.0        24   -0.03               LDSTR   1.1        29   -0.01               R.IDMGR.F   1.1        29   -0.01               R.LDGMR.M ``` | |

|  |  |
| --- | --- |
| |  | | --- | | Top scoring peptide matches to query 1592 40: Sum of 4 scans in range 312 (rt=19.7721, f=2, i=55) to 330 (rt=20.6682, f=2, i=58) [\\172.16.3.18\masslynx\2009.PRO\Data\20090526\_25\_qdda.raw] Score greater than 16 indicates homology Score greater than 28 indicates identity  ``` Score    Expect   Delta  Hit  Protein Peptide   3.9        15   -0.07   28   P04003 GFVLR ``` | |

|  |  |
| --- | --- |
| |  | | --- | | Top scoring peptide matches to query 1595 10: Sum of 2 scans in range 184 (rt=13.3694, f=2, i=47) to 190 (rt=13.6681, f=2, i=48) [\\172.16.3.18\masslynx\2009.PRO\Data\20090530\_30\_qdda.raw] Score greater than 15 indicates homology Score greater than 28 indicates identity  ``` Score    Expect   Delta  Hit  Protein Peptide   3.9        15    0.00   20   P02790 R.LDTSR.D   2.7        20    0.02               R.LDGMR.M   1.5        27    0.00               LDSTR   0.5        34    0.02               R.IDMGR.F ``` | |

|  |  |
| --- | --- |
| |  | | --- | | Top scoring peptide matches to query 1596 16: Sum of 4 scans in range 183 (rt=13.4005, f=6, i=6) to 201 (rt=14.2966, f=6, i=9) [\\172.16.3.18\masslynx\2009.PRO\Data\20090530\_24\_qdda.raw] Score greater than 13 indicates homology Score greater than 28 indicates identity  ``` Score    Expect   Delta  Hit  Protein Peptide   2.5        21    0.01               M.DISTR.S   2.5        21    0.01               R.DITSR.K   2.5        21    0.01               K.DLSTR.S   2.5        21    0.01               K.DLTSR.V   0.7        32    0.03               R.IDMGR.F   0.7        32    0.03               R.LDGMR.M   0.7        32    0.01               LDSTR   0.7        32    0.01   20   P02790 R.LDTSR.D ``` | |

|  |  |
| --- | --- |
| |  | | --- | | Top scoring peptide matches to query 1597 47: Sum of 4 scans in range 365 (rt=22.3706, f=3, i=48) to 383 (rt=23.2666, f=3, i=51) [\\172.16.3.18\masslynx\2009.PRO\Data\20090530\_21\_qdda.raw] Score greater than 14 indicates homology Score greater than 28 indicates identity  ``` Score    Expect   Delta  Hit  Protein Peptide   1.6        26   -0.01   28   P04003 GFVLR ``` | |

|  |  |
| --- | --- |
| |  | | --- | | Top scoring peptide matches to query 1637 21: Sum of 4 scans in range 201 (rt=14.342, f=3, i=22) to 219 (rt=15.238, f=3, i=25) [\\172.16.3.18\masslynx\2009.PRO\Data\20090529\_21\_qdda.raw] Score greater than 14 indicates homology Score greater than 30 indicates identity  ``` Score    Expect   Delta  Hit  Protein Peptide   1.6        42   -0.03    1   P01024 AFSDR ``` | |

|  |  |
| --- | --- |
| |  | | --- | | Top scoring peptide matches to query 1712 16: Sum of 4 scans in range 179 (rt=13.2527, f=5, i=7) to 197 (rt=14.1488, f=5, i=10) [\\172.16.3.18\masslynx\2009.PRO\Data\20090529\_18\_qdda.raw] Score greater than 19 indicates homology Score greater than 25 indicates identity  ``` Score    Expect   Delta  Hit  Protein Peptide   6.1       3.9   -0.07    8   P00450 R.VPVER.K ``` | |

|  |  |
| --- | --- |
| |  | | --- | | Top scoring peptide matches to query 1719 17: Sum of 4 scans in range 175 (rt=13.0533, f=5, i=5) to 193 (rt=13.9494, f=5, i=8) [\\172.16.3.18\masslynx\2009.PRO\Data\20090528\_18\_qdda.raw] Score greater than 14 indicates homology Score greater than 25 indicates identity  ``` Score    Expect   Delta  Hit  Protein Peptide   8.7       2.2   -0.04    8   P00450 R.VPVER.K   0.8        13   -0.04               M.VPEVR.V ``` | |

|  |  |
| --- | --- |
| |  | | --- | | Top scoring peptide matches to query 1756 40: Sum of 3 scans in range 289 (rt=18.6798, f=4, i=24) to 301 (rt=19.2771, f=4, i=26) [\\172.16.3.18\masslynx\2009.PRO\Data\20090529\_24\_qdda.raw] Score greater than 20 indicates homology Score greater than 28 indicates identity  ``` Score    Expect   Delta  Hit  Protein Peptide  12.1       2.3   -0.04               DVIVR  12.1       2.3   -0.04   48   P01876 DVLVR   7.1       7.4   -0.04               R.DIVVR.K   7.1       7.4   -0.04               DLVVR   7.1       7.4    0.03               K.DPDVR.L   3.2        18   -0.04               DVVIR   1.7        26   -0.08               R.TLIVR.H   1.7        26   -0.08               R.TLLVR.H ``` | |

|  |  |
| --- | --- |
| |  | | --- | | Top scoring peptide matches to query 1757 31: Sum of 4 scans in range 268 (rt=17.5077, f=5, i=17) to 286 (rt=18.4037, f=5, i=20) [\\172.16.3.18\masslynx\2009.PRO\Data\20090530\_12\_qdda.raw] Score greater than 15 indicates homology Score greater than 28 indicates identity  ``` Score    Expect   Delta  Hit  Protein Peptide   7.8       6.3   -0.04               DVIVR   7.8       6.3   -0.04   48   P01876 DVLVR   2.5        21   -0.01               LSPER   2.1        23   -0.04               R.DIVVR.K   2.1        23   -0.04               DLVVR   2.1        23    0.03               K.DPDVR.L   1.8        25   -0.04               DVVIR ``` | |

|  |  |
| --- | --- |
| |  | | --- | | Top scoring peptide matches to query 1763 41: Sum of 2 scans in range 250 (rt=16.7966, f=4, i=18) to 256 (rt=17.0955, f=4, i=19) [\\172.16.3.18\masslynx\2009.PRO\Data\20090522\_13\_qdda.raw] Score greater than 23 indicates homology Score greater than 28 indicates identity  ``` Score    Expect   Delta  Hit  Protein Peptide  20.0      0.38   -0.02               DVIVR  20.0      0.38   -0.02   48   P01876 DVLVR   8.9       4.9   -0.02               DVVIR   8.7       5.1   -0.02               R.DIVVR.K   8.7       5.1   -0.02               DLVVR   8.7       5.1    0.05               K.DPDVR.L   7.0       7.4   -0.06               R.TLIVR.H   7.0       7.4   -0.06               R.TLLVR.H   0.7        32    0.01               K.DIPTR.L   0.7        32    0.01               K.DITPR.N ``` | |

|  |  |
| --- | --- |
| |  | | --- | | Top scoring peptide matches to query 1765 28: Sum of 3 scans in range 262 (rt=17.3015, f=2, i=45) to 268 (rt=17.6002, f=2, i=46) [\\172.16.3.18\masslynx\2009.PRO\Data\20090528\_12\_qdda.raw] Score greater than 22 indicates homology Score greater than 28 indicates identity  ``` Score    Expect   Delta  Hit  Protein Peptide  15.6         1   -0.01               DVIVR  15.6         1   -0.01   48   P01876 DVLVR   8.8         5   -0.01               R.DIVVR.K   8.8         5   -0.01               DLVVR   8.8         5    0.07               K.DPDVR.L   7.0       7.4   -0.01               DVVIR   5.0        12   -0.04               R.TLIVR.H   5.0        12   -0.04               R.TLLVR.H   0.9        31    0.03               K.DIPTR.L   0.9        31    0.03               K.DITPR.N ``` | |

|  |  |
| --- | --- |
| |  | | --- | | Top scoring peptide matches to query 1845 36: Sum of 4 scans in range 294 (rt=18.7889, f=4, i=21) to 312 (rt=19.6851, f=4, i=24) [\\172.16.3.18\masslynx\2009.PRO\Data\20090530\_12\_qdda.raw] Score greater than 23 indicates homology Score greater than 29 indicates identity  ``` Score    Expect   Delta  Hit  Protein Peptide  11.9       2.7   -0.04               R.DSIIR.I  11.9       2.7   -0.04               DSILR  11.9       2.7   -0.04               K.DSLIR.Q  11.9       2.7   -0.04               DSLLR   9.6       4.5   -0.04               DLSIR   9.6       4.5   -0.04   50   P43652 DLSLR   9.2       4.9   -0.01               DAELR   9.2       4.9   -0.01               R.DEALR.L   9.2       4.9   -0.04               K.DTVLR.Q   9.2       4.9   -0.04               DVTLR ``` | |

|  |  |
| --- | --- |
| |  | | --- | | Top scoring peptide matches to query 1864 57: Sum of 4 scans in range 384 (rt=23.3895, f=2, i=85) to 402 (rt=24.2855, f=2, i=88) [\\172.16.3.18\masslynx\2009.PRO\Data\20090522\_37\_qdda.raw] Score greater than 20 indicates homology Score greater than 29 indicates identity  ``` Score    Expect   Delta  Hit  Protein Peptide  11.5       3.5   -0.14   14   P04217 R.FALVR.E  11.5       3.5   -0.11               MALVR   6.8        10   -0.14               K.FAVIR.H   6.8        10   -0.03               MADPR   6.8        10   -0.11               MAVLR   4.8        16   -0.14               FLAVR   4.8        16   -0.10               FSPVR   4.8        16   -0.11               MLAVR   4.8        16   -0.07               -.MPSVR.S   4.8        16   -0.07               -.MSPVR.R ``` | |

|  |  |
| --- | --- |
| |  | | --- | | Top scoring peptide matches to query 1866 61: Sum of 9 scans in range 393 (rt=23.7823, f=3, i=52) to 416 (rt=24.9202, f=7, i=50) [\\172.16.3.18\masslynx\2009.PRO\Data\20090529\_12\_qdda.raw] Score greater than 20 indicates homology Score greater than 29 indicates identity  ``` Score    Expect   Delta  Hit  Protein Peptide  12.1         3   -0.09   14   P04217 R.FALVR.E  12.1         3   -0.05               MALVR   6.4        11   -0.09               K.FAVIR.H   6.4        11    0.02               MADPR   6.4        11   -0.05               MAVLR   4.5        18   -0.09               FLAVR   4.5        18   -0.05               FSPVR   4.5        18   -0.05               MLAVR   4.5        18   -0.02               -.MPSVR.S   4.5        18   -0.02               -.MSPVR.R ``` | |

|  |  |
| --- | --- |
| |  | | --- | | Top scoring peptide matches to query 1867 54: Sum of 8 scans in range 388 (rt=23.4423, f=2, i=75) to 408 (rt=24.4379, f=4, i=39) [\\172.16.3.18\masslynx\2009.PRO\Data\20090526\_28\_qdda.raw] Score greater than 20 indicates homology Score greater than 29 indicates identity  ``` Score    Expect   Delta  Hit  Protein Peptide  12.7       2.6   -0.08   14   P04217 R.FALVR.E  12.7       2.6   -0.05               MALVR   6.8        10   -0.08               K.FAVIR.H   6.8        10    0.02               MADPR   6.8        10   -0.05               MAVLR   4.8        16   -0.08               FLAVR   4.8        16   -0.05               FSPVR   4.8        16   -0.05               MLAVR   4.8        16   -0.02               -.MPSVR.S   4.8        16   -0.02               -.MSPVR.R ``` | |

|  |  |
| --- | --- |
| |  | | --- | | Top scoring peptide matches to query 1868 58: Sum of 4 scans in range 399 (rt=23.9092, f=2, i=70) to 417 (rt=24.8052, f=2, i=73) [\\172.16.3.18\masslynx\2009.PRO\Data\20090525\_28\_qdda.raw] Score greater than 20 indicates homology Score greater than 29 indicates identity  ``` Score    Expect   Delta  Hit  Protein Peptide  13.8         2   -0.07   14   P04217 R.FALVR.E  13.8         2   -0.04               MALVR   6.8        10   -0.07               K.FAVIR.H   6.8        10   -0.04               MAVLR   5.2        15   -0.07               R.AFIVR.S   5.2        15   -0.07               R.AFLVR.S   5.2        15   -0.04               K.AMIVR.N   5.2        15   -0.07               FLAVR   5.2        15   -0.04               FSPVR   5.2        15   -0.04               MLAVR ``` | |

|  |  |
| --- | --- |
| |  | | --- | | Top scoring peptide matches to query 1869 62: Sum of 9 scans in range 387 (rt=23.4614, f=3, i=52) to 410 (rt=24.5993, f=7, i=50) [\\172.16.3.18\masslynx\2009.PRO\Data\20090528\_24\_qdda.raw] Score greater than 20 indicates homology Score greater than 29 indicates identity  ``` Score    Expect   Delta  Hit  Protein Peptide   7.7       8.3    0.00               K.SPMVR.K   7.1       9.5   -0.07   14   P04217 R.FALVR.E   7.1       9.5   -0.03               MALVR   5.5        14   -0.07               K.FAVIR.H   5.5        14   -0.03               MAVLR   1.1        38   -0.07               R.AFIVR.S   1.1        38   -0.07               R.AFLVR.S   1.1        38   -0.03               K.AMIVR.N   0.2        47   -0.03               R.IAMVR.N ``` | |

|  |  |
| --- | --- |
| |  | | --- | | Top scoring peptide matches to query 1870 59: Sum of 8 scans in range 387 (rt=23.5748, f=3, i=51) to 407 (rt=24.5704, f=5, i=42) [\\172.16.3.18\masslynx\2009.PRO\Data\20090528\_27\_qdda.raw] Score greater than 20 indicates homology Score greater than 29 indicates identity  ``` Score    Expect   Delta  Hit  Protein Peptide  12.4       2.8   -0.06   14   P04217 R.FALVR.E  12.4       2.8   -0.03               MALVR   6.5        11   -0.06               K.FAVIR.H   6.5        11   -0.03               MAVLR   4.7        17   -0.06               FLAVR   4.7        17   -0.02               FSPVR   4.7        17   -0.03               MLAVR   4.7        17    0.01               -.MPSVR.S   4.7        17    0.01               -.MSPVR.R   4.1        19   -0.06               R.AFIVR.S ``` | |

|  |  |
| --- | --- |
| |  | | --- | | Top scoring peptide matches to query 1871 54: Sum of 4 scans in range 401 (rt=24.0639, f=3, i=48) to 419 (rt=24.96, f=3, i=51) [\\172.16.3.18\masslynx\2009.PRO\Data\20090530\_12\_qdda.raw] Score greater than 20 indicates homology Score greater than 29 indicates identity  ``` Score    Expect   Delta  Hit  Protein Peptide  10.9         4   -0.06   14   P04217 R.FALVR.E  10.9         4   -0.03               MALVR   6.6        11   -0.06               K.FAVIR.H   6.6        11   -0.03               MAVLR   4.6        17   -0.06               FLAVR   4.6        17   -0.02               FSPVR   4.6        17   -0.03               MLAVR   4.6        17    0.01               -.MPSVR.S   4.6        17    0.01               -.MSPVR.R   3.5        22    0.01               K.SPMVR.K ``` | |

|  |  |
| --- | --- |
| |  | | --- | | Top scoring peptide matches to query 1872 66: Sum of 4 scans in range 393 (rt=23.7948, f=4, i=44) to 411 (rt=24.6909, f=4, i=47) [\\172.16.3.18\masslynx\2009.PRO\Data\20090526\_22\_qdda.raw] Score greater than 13 indicates homology Score greater than 29 indicates identity  ``` Score    Expect   Delta  Hit  Protein Peptide   5.0        15    0.01               K.SPMVR.K   0.7        42   -0.06   14   P04217 R.FALVR.E   0.7        42   -0.03               MALVR ``` | |

|  |  |
| --- | --- |
| |  | | --- | | Top scoring peptide matches to query 1877 57: Sum of 4 scans in range 400 (rt=24.1943, f=4, i=54) to 418 (rt=25.0903, f=4, i=57) [\\172.16.3.18\masslynx\2009.PRO\Data\20090526\_19\_qdda.raw] Score greater than 16 indicates homology Score greater than 29 indicates identity  ``` Score    Expect   Delta  Hit  Protein Peptide   3.8        21    0.03               K.SPMVR.K   3.6        21   -0.04   14   P04217 R.FALVR.E   3.6        21   -0.01               MALVR ``` | |

|  |  |
| --- | --- |
| |  | | --- | | Top scoring peptide matches to query 1878 56: Sum of 4 scans in range 416 (rt=24.934, f=3, i=66) to 434 (rt=25.83, f=3, i=69) [\\172.16.3.18\masslynx\2009.PRO\Data\20090529\_18\_qdda.raw] Score greater than 19 indicates homology Score greater than 29 indicates identity  ``` Score    Expect   Delta  Hit  Protein Peptide   6.2        12   -0.04   14   P04217 R.FALVR.E   6.2        12   -0.01               MALVR ``` | |

|  |  |
| --- | --- |
| |  | | --- | | Top scoring peptide matches to query 1880 106: Sum of 17 scans in range 1290 (rt=68.4468, f=3, i=227) to 1348 (rt=71.3207, f=6, i=178) [\\172.16.3.18\masslynx\2009.PRO\Data\20090531\_05\_qdda.raw] Score greater than 20 indicates homology Score greater than 29 indicates identity  ``` Score    Expect   Delta  Hit  Protein Peptide  12.8       2.6   -0.02   14   P04217 R.FALVR.E  12.8       2.6    0.01               MALVR   6.8        10   -0.02               K.FAVIR.H   6.8        10    0.08               MADPR   6.8        10    0.01               MAVLR   5.0        16   -0.02               FLAVR   5.0        16    0.01               FSPVR   5.0        16    0.01               MLAVR   5.0        16    0.05               -.MPSVR.S   5.0        16    0.05               -.MSPVR.R ``` | |

|  |  |
| --- | --- |
| |  | | --- | | Top scoring peptide matches to query 1884 71: Sum of 4 scans in range 430 (rt=25.582, f=5, i=42) to 447 (rt=26.4283, f=5, i=45) [\\172.16.3.18\masslynx\2009.PRO\Data\20090528\_15\_qdda.raw] Score greater than 14 indicates homology Score greater than 29 indicates identity  ``` Score    Expect   Delta  Hit  Protein Peptide   4.7        17    0.06               K.SPMVR.K   1.1        38   -0.01   14   P04217 R.FALVR.E   1.1        38    0.02               MALVR ``` | |

|  |  |
| --- | --- |
| |  | | --- | | Top scoring peptide matches to query 1915 38: Sum of 4 scans in range 293 (rt=18.7403, f=4, i=21) to 311 (rt=19.6365, f=4, i=24) [\\172.16.3.18\masslynx\2009.PRO\Data\20090525\_25\_qdda.raw] Score greater than 26 indicates homology Score greater than 32 indicates identity  ``` Score    Expect   Delta  Hit  Protein Peptide  13.5       3.6   -0.07               -.MSLSR.S  12.6       4.5   -0.10    7   P01011 FSISR  12.6       4.5   -0.10               FSLSR   8.3        12   -0.03               -.MSEAR.R   7.5        14   -0.06               R.FSEAR.I   7.5        14   -0.10               FSSLR   4.0        32   -0.10               K.AYISR.S   4.0        32   -0.07               K.SMISR.K   3.7        34   -0.03               -.MAESR.G   3.7        34   -0.03               MEASR ``` | |

|  |  |
| --- | --- |
| |  | | --- | | Top scoring peptide matches to query 1916 32: Sum of 4 scans in range 296 (rt=19.0501, f=4, i=27) to 314 (rt=19.9462, f=4, i=30) [\\172.16.3.18\masslynx\2009.PRO\Data\20090525\_19\_qdda.raw] Score greater than 18 indicates homology Score greater than 32 indicates identity  ``` Score    Expect   Delta  Hit  Protein Peptide   6.5        18   -0.07               -.MSLSR.S   5.7        22   -0.10    7   P01011 FSISR   5.7        22   -0.10               FSLSR   5.6        22   -0.06               R.FSEAR.I   5.6        22   -0.03               -.MSEAR.R   2.9        42   -0.10               FSSLR ``` | |

|  |  |
| --- | --- |
| |  | | --- | | Top scoring peptide matches to query 1920 37: Sum of 8 scans in range 252 (rt=16.8045, f=3, i=32) to 299 (rt=19.1317, f=5, i=24) [\\172.16.3.18\masslynx\2009.PRO\Data\20090528\_24\_qdda.raw] Score greater than 24 indicates homology Score greater than 32 indicates identity  ``` Score    Expect   Delta  Hit  Protein Peptide  11.8       5.3   -0.06               -.MSLSR.S  10.9       6.5   -0.09    7   P01011 FSISR  10.9       6.5   -0.09               FSLSR   6.7        17   -0.02               -.MSEAR.R   5.9        21   -0.06               R.FSEAR.I   5.9        21   -0.09               FSSLR   4.9        26   -0.02               K.SMAER.A   4.1        31   -0.06               R.SFAER.Y   3.7        34   -0.02               MASER   3.7        34   -0.02               K.MTGER.T ``` | |

|  |  |
| --- | --- |
| |  | | --- | | Top scoring peptide matches to query 1930 37: Sum of 4 scans in range 287 (rt=18.5406, f=4, i=22) to 305 (rt=19.4366, f=4, i=25) [\\172.16.3.18\masslynx\2009.PRO\Data\20090526\_25\_qdda.raw] Score greater than 21 indicates homology Score greater than 32 indicates identity  ``` Score    Expect   Delta  Hit  Protein Peptide   8.4        12   -0.02               -.MSLSR.S   7.8        13   -0.05    7   P01011 FSISR   7.8        13   -0.05               FSLSR   5.6        22    0.02               -.MSEAR.R   4.8        26   -0.01               R.FSEAR.I   4.8        26   -0.05               FSSLR   4.1        31    0.02               K.SMAER.A   3.7        34   -0.01               R.FGTER.V   3.3        37   -0.01               R.SFAER.Y   3.2        38    0.02               MASER ``` | |

|  |  |
| --- | --- |
| |  | | --- | | Top scoring peptide matches to query 1931 59: Sum of 2 scans in range 379 (rt=22.8552, f=3, i=51) to 385 (rt=23.1539, f=3, i=52) [\\172.16.3.18\masslynx\2009.PRO\Data\20090529\_27\_qdda.raw] Score greater than 22 indicates homology Score greater than 32 indicates identity  ``` Score    Expect   Delta  Hit  Protein Peptide  10.1       7.9   -0.01               -.MSLSR.S   9.3       9.4   -0.04    7   P01011 FSISR   9.3       9.4   -0.04               FSLSR   6.1        20   -0.01               R.FSEAR.I   6.1        20   -0.04               FSSLR   6.1        20    0.03               -.MSEAR.R   2.9        41   -0.01               MLSSR   2.4        46   -0.04               R.FISSR.Q   2.4        46   -0.04               FLSSR ``` | |

|  |  |
| --- | --- |
| |  | | --- | | Top scoring peptide matches to query 1932 37: Sum of 8 scans in range 259 (rt=17.1887, f=5, i=17) to 303 (rt=19.3661, f=4, i=31) [\\172.16.3.18\masslynx\2009.PRO\Data\20090526\_22\_qdda.raw] Score greater than 18 indicates homology Score greater than 32 indicates identity  ``` Score    Expect   Delta  Hit  Protein Peptide   5.6        22   -0.01               -.MSLSR.S   5.0        26   -0.04    7   P01011 FSISR   5.0        26   -0.04               FSLSR   1.0        63    0.03               -.MSEAR.R   0.7        69   -0.01               R.FSEAR.I ``` | |

|  |  |
| --- | --- |
| |  | | --- | | Top scoring peptide matches to query 1933 37: Sum of 4 scans in range 279 (rt=18.2495, f=3, i=35) to 297 (rt=19.1455, f=3, i=38) [\\172.16.3.18\masslynx\2009.PRO\Data\20090528\_27\_qdda.raw] Score greater than 25 indicates homology Score greater than 32 indicates identity  ``` Score    Expect   Delta  Hit  Protein Peptide  12.4       4.6   -0.00               -.MSLSR.S  11.4       5.8   -0.04    7   P01011 FSISR  11.4       5.8   -0.04               FSLSR   7.2        15    0.03               -.MSEAR.R   6.3        19   -0.00               R.FSEAR.I   6.3        19   -0.04               FSSLR   5.7        22   -0.00               R.FGTER.V   5.6        22    0.03               K.SMAER.A   4.7        27   -0.00               R.SFAER.Y   4.3        30    0.03               MASER ``` | |

|  |  |
| --- | --- |
| |  | | --- | | Top scoring peptide matches to query 1936 54: Scan 396 (rt=23.4478, f=5, i=14) [\\172.16.3.18\masslynx\2009.PRO\Data\20090529\_33\_qdda.raw] Score greater than 19 indicates homology Score greater than 32 indicates identity  ``` Score    Expect   Delta  Hit  Protein Peptide   7.7        14    0.00               -.MSLSR.S   6.3        19   -0.03    7   P01011 FSISR   6.3        19   -0.03               FSLSR   5.0        25    0.04               -.MSEAR.R   3.6        35    0.01               R.FSEAR.I   3.6        35   -0.03               FSSLR   1.4        58    0.00               K.SMISR.K ``` | |

|  |  |
| --- | --- |
| |  | | --- | | Top scoring peptide matches to query 1937 47: Sum of 4 scans in range 322 (rt=20.3216, f=5, i=28) to 340 (rt=21.2176, f=5, i=31) [\\172.16.3.18\masslynx\2009.PRO\Data\20090526\_13\_qdda.raw] Score greater than 20 indicates homology Score greater than 32 indicates identity  ``` Score    Expect   Delta  Hit  Protein Peptide   8.5        11    0.01               -.MSLSR.S   7.7        14   -0.03    7   P01011 FSISR   7.7        14   -0.03               FSLSR   5.1        25    0.01               R.FSEAR.I   5.1        25   -0.03               FSSLR   5.1        25    0.04               -.MSEAR.R ``` | |

|  |  |
| --- | --- |
| |  | | --- | | Top scoring peptide matches to query 1942 42: Sum of 4 scans in range 322 (rt=20.1699, f=5, i=25) to 340 (rt=21.066, f=5, i=28) [\\172.16.3.18\masslynx\2009.PRO\Data\20090530\_12\_qdda.raw] Score greater than 18 indicates homology Score greater than 32 indicates identity  ``` Score    Expect   Delta  Hit  Protein Peptide   5.7        22    0.02               -.MSLSR.S   5.2        24    0.05               K.SMAER.A   5.0        25   -0.02    7   P01011 FSISR   5.0        25   -0.02               FSLSR   4.3        30    0.02               K.ASFER.M   4.2        30    0.02               R.SFAER.Y   2.2        48    0.05               -.MSEAR.R   1.9        52   -0.02               K.AYISR.S   1.8        53   -0.02               FSSLR   1.6        56    0.02               R.FGTER.V ``` | |

|  |  |
| --- | --- |
| |  | | --- | | Top scoring peptide matches to query 1943 67: Sum of 3 scans in range 364 (rt=22.1303, f=3, i=55) to 375 (rt=22.6779, f=3, i=57) [\\172.16.3.18\masslynx\2009.PRO\Data\20090530\_27\_qdda.raw] Score greater than 22 indicates homology Score greater than 32 indicates identity  ``` Score    Expect   Delta  Hit  Protein Peptide  12.2       4.9   -0.01    7   P01011 FSISR  12.2       4.9   -0.01               FSLSR  12.2       4.9    0.03               -.MSLSR.S   8.5        11    0.03               R.FSEAR.I   8.5        11   -0.01               FSSLR   8.5        11    0.06               -.MSEAR.R   4.4        29   -0.01               K.AYISR.S   4.4        29   -0.01               SFISR   4.4        29   -0.01               SFLSR   4.4        29    0.03               K.SMISR.K ``` | |

|  |  |
| --- | --- |
| |  | | --- | | Top scoring peptide matches to query 1947 50: Sum of 5 scans in range 353 (rt=21.706, f=7, i=18) to 368 (rt=22.4455, f=7, i=22) [\\172.16.3.18\masslynx\2009.PRO\Data\20090526\_10\_qdda.raw] Score greater than 21 indicates homology Score greater than 32 indicates identity  ``` Score    Expect   Delta  Hit  Protein Peptide   9.2       9.7    0.03               -.MSLSR.S   8.4        12    0.00    7   P01011 FSISR   8.4        12    0.00               FSLSR   6.3        19    0.00               K.AYISR.S   6.0        20    0.07               -.MSEAR.R   5.4        23    0.04               R.FSEAR.I   4.0        32    0.00               FSSLR   2.6        44    0.04               K.AYEAR.R   2.2        48    0.03               MLSSR   1.7        54    0.00               R.FISSR.Q ``` | |

|  |  |
| --- | --- |
| |  | | --- | | Top scoring peptide matches to query 1953 57: Sum of 3 scans in range 377 (rt=22.5819, f=2, i=123) to 383 (rt=22.8806, f=2, i=124) [\\172.16.3.18\masslynx\2009.PRO\Data\20090530\_33\_qdda.raw] Score greater than 20 indicates homology Score greater than 32 indicates identity  ``` Score    Expect   Delta  Hit  Protein Peptide   8.2        12    0.04               -.MSLSR.S   7.1        16    0.01    7   P01011 FSISR   7.1        16    0.01               FSLSR   5.4        23    0.08               -.MSEAR.R   4.4        29    0.05               R.FSEAR.I   4.4        29    0.01               FSSLR   2.8        42    0.08               -.MAESR.G   2.8        42    0.08               MEASR   2.8        42    0.04               MLSSR   2.7        43    0.01               R.FISSR.Q ``` | |

|  |  |
| --- | --- |
| |  | | --- | | Top scoring peptide matches to query 1962 18: Sum of 4 scans in range 216 (rt=15.106, f=5, i=9) to 234 (rt=16.0021, f=5, i=12) [\\172.16.3.18\masslynx\2009.PRO\Data\20090525\_19\_qdda.raw] Score greater than 20 indicates homology Score greater than 26 indicates identity  ``` Score    Expect   Delta  Hit  Protein Peptide  10.6       1.9   -0.08    5   P02647 VEPLR   7.3         4   -0.08               K.DILPR.H   7.3         4   -0.08               DLLPR   7.3         4   -0.08               K.DLPIR.K   7.3         4   -0.08               DLPLR   7.3         4   -0.08               R.EVIPR.S   7.3         4   -0.08               R.EVLPR.S   7.3         4   -0.08               R.EVPLR.C   7.3         4   -0.08               R.IDLPR.K   7.3         4   -0.08               R.IDPIR.S ``` | |

|  |  |
| --- | --- |
| |  | | --- | | Top scoring peptide matches to query 1964 23: Sum of 4 scans in range 218 (rt=15.2589, f=4, i=16) to 236 (rt=16.155, f=4, i=19) [\\172.16.3.18\masslynx\2009.PRO\Data\20090522\_25\_qdda.raw] Score greater than 15 indicates homology Score greater than 26 indicates identity  ``` Score    Expect   Delta  Hit  Protein Peptide   2.7        11   -0.07    5   P02647 VEPLR   2.5        12   -0.07               R.EVIPR.S   2.5        12   -0.07               R.EVLPR.S   2.5        12   -0.07               R.EVPLR.C ``` | |

|  |  |
| --- | --- |
| |  | | --- | | Top scoring peptide matches to query 1965 34: Sum of 4 scans in range 226 (rt=15.6232, f=2, i=36) to 243 (rt=16.4695, f=2, i=39) [\\172.16.3.18\masslynx\2009.PRO\Data\20090525\_13\_qdda.raw] Score greater than 20 indicates homology Score greater than 26 indicates identity  ``` Score    Expect   Delta  Hit  Protein Peptide   8.7       2.9   -0.07    5   P02647 VEPLR   7.6       3.7   -0.07               K.DILPR.H   7.6       3.7   -0.07               DLLPR   7.6       3.7   -0.07               K.DLPIR.K   7.6       3.7   -0.07               DLPLR   7.6       3.7   -0.07               R.EVIPR.S   7.6       3.7   -0.07               R.EVLPR.S   7.6       3.7   -0.07               R.EVPLR.C   7.6       3.7   -0.07               R.IDLPR.K   7.6       3.7   -0.07               R.IDPIR.S ``` | |

|  |  |
| --- | --- |
| |  | | --- | | Top scoring peptide matches to query 1966 24: Sum of 4 scans in range 238 (rt=16.027, f=2, i=50) to 256 (rt=16.9233, f=2, i=53) [\\172.16.3.18\masslynx\2009.PRO\Data\20090530\_12\_qdda.raw] Score greater than 17 indicates homology Score greater than 26 indicates identity  ``` Score    Expect   Delta  Hit  Protein Peptide   5.7       5.7   -0.07    5   P02647 VEPLR   4.8       7.1   -0.07               K.DILPR.H   4.8       7.1   -0.07               DLLPR   4.8       7.1   -0.07               K.DLPIR.K   4.8       7.1   -0.07               DLPLR   4.8       7.1   -0.07               R.EVIPR.S   4.8       7.1   -0.07               R.EVLPR.S   4.8       7.1   -0.07               R.EVPLR.C   4.8       7.1   -0.07               R.IDLPR.K   4.8       7.1   -0.07               R.IDPIR.S ``` | |

|  |  |
| --- | --- |
| |  | | --- | | Top scoring peptide matches to query 1968 34: Sum of 8 scans in range 249 (rt=16.7144, f=5, i=15) to 279 (rt=18.195, f=2, i=47) [\\172.16.3.18\masslynx\2009.PRO\Data\20090529\_24\_qdda.raw] Score greater than 20 indicates homology Score greater than 26 indicates identity  ``` Score    Expect   Delta  Hit  Protein Peptide  10.0       2.1   -0.05    5   P02647 VEPLR   7.6       3.7   -0.05               K.DILPR.H   7.6       3.7   -0.05               DLLPR   7.6       3.7   -0.05               K.DLPIR.K   7.6       3.7   -0.05               DLPLR   7.6       3.7   -0.05               R.EVIPR.S   7.6       3.7   -0.05               R.EVLPR.S   7.6       3.7   -0.05               R.EVPLR.C   7.6       3.7   -0.05               R.IDLPR.K   7.6       3.7   -0.05               R.IDPIR.S ``` | |

|  |  |
| --- | --- |
| |  | | --- | | Top scoring peptide matches to query 1975 29: Sum of 5 scans in range 222 (rt=15.3513, f=7, i=14) to 241 (rt=16.2899, f=7, i=18) [\\172.16.3.18\masslynx\2009.PRO\Data\20090530\_18\_qdda.raw] Score greater than 21 indicates homology Score greater than 26 indicates identity  ``` Score    Expect   Delta  Hit  Protein Peptide  11.4       1.6   -0.03    5   P02647 VEPLR   7.5       3.8   -0.03               K.DILPR.H   7.5       3.8   -0.03               DLLPR   7.5       3.8   -0.03               K.DLPIR.K   7.5       3.8   -0.03               DLPLR   7.5       3.8   -0.03               R.EVIPR.S   7.5       3.8   -0.03               R.EVLPR.S   7.5       3.8   -0.03               R.EVPLR.C   7.5       3.8   -0.03               R.IDLPR.K   7.5       3.8   -0.03               R.IDPIR.S ``` | |

|  |  |
| --- | --- |
| |  | | --- | | Top scoring peptide matches to query 1976 19: Sum of 5 scans in range 219 (rt=15.1869, f=2, i=37) to 240 (rt=16.2192, f=4, i=26) [\\172.16.3.18\masslynx\2009.PRO\Data\20090528\_12\_qdda.raw] Score greater than 20 indicates homology Score greater than 26 indicates identity  ``` Score    Expect   Delta  Hit  Protein Peptide   7.7       3.6   -0.03    5   P02647 VEPLR   7.6       3.7   -0.03               K.DILPR.H   7.6       3.7   -0.03               DLLPR   7.6       3.7   -0.03               K.DLPIR.K   7.6       3.7   -0.03               DLPLR   7.6       3.7   -0.03               R.EVIPR.S   7.6       3.7   -0.03               R.EVLPR.S   7.6       3.7   -0.03               R.EVPLR.C   7.6       3.7   -0.03               R.IDLPR.K   7.6       3.7   -0.03               R.IDPIR.S ``` | |

|  |  |
| --- | --- |
| |  | | --- | | Top scoring peptide matches to query 1977 26: Sum of 8 scans in range 325 (rt=20.6164, f=3, i=64) to 367 (rt=22.7085, f=3, i=71) [\\172.16.3.18\masslynx\2009.PRO\Data\20090531\_05\_qdda.raw] Score greater than 20 indicates homology Score greater than 26 indicates identity  ``` Score    Expect   Delta  Hit  Protein Peptide  10.3         2   -0.03    5   P02647 VEPLR   7.4       3.9   -0.03               K.DILPR.H   7.4       3.9   -0.03               DLLPR   7.4       3.9   -0.03               K.DLPIR.K   7.4       3.9   -0.03               DLPLR   7.4       3.9   -0.03               R.EVIPR.S   7.4       3.9   -0.03               R.EVLPR.S   7.4       3.9   -0.03               R.EVPLR.C   7.4       3.9   -0.03               R.IDLPR.K   7.4       3.9   -0.03               R.IDPIR.S ``` | |

|  |  |
| --- | --- |
| |  | | --- | | Top scoring peptide matches to query 1979 23: Sum of 8 scans in range 227 (rt=15.6442, f=2, i=34) to 263 (rt=17.4235, f=2, i=41) [\\172.16.3.18\masslynx\2009.PRO\Data\20090526\_13\_qdda.raw] Score greater than 20 indicates homology Score greater than 26 indicates identity  ``` Score    Expect   Delta  Hit  Protein Peptide  10.7       1.8   -0.03    5   P02647 VEPLR   7.5       3.8   -0.03               K.DILPR.H   7.5       3.8   -0.03               DLLPR   7.5       3.8   -0.03               K.DLPIR.K   7.5       3.8   -0.03               DLPLR   7.5       3.8   -0.03               R.EVIPR.S   7.5       3.8   -0.03               R.EVLPR.S   7.5       3.8   -0.03               R.EVPLR.C   7.5       3.8   -0.03               R.IDLPR.K   7.5       3.8   -0.03               R.IDPIR.S ``` | |

|  |  |
| --- | --- |
| |  | | --- | | Top scoring peptide matches to query 1981 26: Sum of 2 scans in range 213 (rt=14.911, f=3, i=29) to 221 (rt=15.2818, f=3, i=30) [\\172.16.3.18\masslynx\2009.PRO\Data\20090529\_27\_qdda.raw] Score greater than 16 indicates homology Score greater than 26 indicates identity  ``` Score    Expect   Delta  Hit  Protein Peptide   3.7       9.2   -0.02    5   P02647 VEPLR ``` | |

|  |  |
| --- | --- |
| |  | | --- | | Top scoring peptide matches to query 1982 32: Sum of 2 scans in range 208 (rt=14.7307, f=3, i=32) to 214 (rt=15.0295, f=3, i=33) [\\172.16.3.18\masslynx\2009.PRO\Data\20090522\_13\_qdda.raw] Score greater than 14 indicates homology Score greater than 26 indicates identity  ``` Score    Expect   Delta  Hit  Protein Peptide   4.8       7.1   -0.02    5   P02647 VEPLR   4.8       7.2    0.00               R.VGGPQR.M   1.8        14    0.00               R.VGGAPGR.C   1.8        14    0.00               K.VNGAPR.E   1.8        14    0.00               K.VNQPR.Q ``` | |

|  |  |
| --- | --- |
| |  | | --- | | Top scoring peptide matches to query 1986 25: Sum of 4 scans in range 237 (rt=16.0639, f=4, i=23) to 254 (rt=16.9102, f=4, i=26) [\\172.16.3.18\masslynx\2009.PRO\Data\20090530\_21\_qdda.raw] Score greater than 15 indicates homology Score greater than 26 indicates identity  ``` Score    Expect   Delta  Hit  Protein Peptide   3.1        10   -0.01               R.EVIPR.S   3.1        10   -0.01               R.EVLPR.S   3.1        10   -0.01               R.EVPLR.C   2.7        12   -0.01    5   P02647 VEPLR   0.4        19   -0.01               K.DLPIR.K   0.4        19   -0.01               DLPLR ``` | |

|  |  |
| --- | --- |
| |  | | --- | | Top scoring peptide matches to query 1989 29: Sum of 4 scans in range 243 (rt=16.3482, f=4, i=23) to 259 (rt=17.1447, f=4, i=26) [\\172.16.3.18\masslynx\2009.PRO\Data\20090530\_24\_qdda.raw] Score greater than 21 indicates homology Score greater than 26 indicates identity  ``` Score    Expect   Delta  Hit  Protein Peptide  10.8       1.8   -0.01    5   P02647 VEPLR   7.6       3.7   -0.01               K.DILPR.H   7.6       3.7   -0.01               DLLPR   7.6       3.7   -0.01               K.DLPIR.K   7.6       3.7   -0.01               DLPLR   7.6       3.7   -0.01               R.EVIPR.S   7.6       3.7   -0.01               R.EVLPR.S   7.6       3.7   -0.01               R.EVPLR.C   7.6       3.7   -0.01               R.IDLPR.K   7.6       3.7   -0.01               R.IDPIR.S ``` | |

|  |  |
| --- | --- |
| |  | | --- | | Top scoring peptide matches to query 1993 44: Sum of 3 scans in range 229 (rt=15.7844, f=3, i=30) to 244 (rt=16.5112, f=5, i=19) [\\172.16.3.18\masslynx\2009.PRO\Data\20090525\_10\_qdda.raw] Score greater than 18 indicates homology Score greater than 26 indicates identity  ``` Score    Expect   Delta  Hit  Protein Peptide   7.0       4.3   -0.00    5   P02647 VEPLR   5.2       6.5   -0.00               K.DILPR.H   5.2       6.5   -0.00               DLLPR   5.2       6.5   -0.00               K.DLPIR.K   5.2       6.5   -0.00               DLPLR   5.2       6.5   -0.00               R.EVIPR.S   5.2       6.5   -0.00               R.EVLPR.S   5.2       6.5   -0.00               R.EVPLR.C   5.2       6.5   -0.00               R.IDLPR.K   5.2       6.5   -0.00               R.IDPIR.S ``` | |

|  |  |
| --- | --- |
| |  | | --- | | Top scoring peptide matches to query 1995 38: Scan 234 (rt=15.9182, f=4, i=22) [\\172.16.3.18\masslynx\2009.PRO\Data\20090525\_\_07\_qdda.raw] Score greater than 20 indicates homology Score greater than 26 indicates identity  ``` Score    Expect   Delta  Hit  Protein Peptide   9.8       2.2    0.00    5   P02647 VEPLR   6.7       4.6    0.00               K.DILPR.H   6.7       4.6    0.00               DLLPR   6.7       4.6    0.00               K.DLPIR.K   6.7       4.6    0.00               DLPLR   6.7       4.6    0.00               R.EVIPR.S   6.7       4.6    0.00               R.EVLPR.S   6.7       4.6    0.00               R.EVPLR.C   6.7       4.6    0.00               R.IDLPR.K   6.7       4.6    0.00               R.IDPIR.S ``` | |

|  |  |
| --- | --- |
| |  | | --- | | Top scoring peptide matches to query 1997 18: Sum of 6 scans in range 211 (rt=14.7684, f=3, i=28) to 224 (rt=15.3955, f=4, i=17) [\\172.16.3.18\masslynx\2009.PRO\Data\20090528\_09\_qdda.raw] Score greater than 20 indicates homology Score greater than 26 indicates identity  ``` Score    Expect   Delta  Hit  Protein Peptide  12.8       1.1    0.01    5   P02647 VEPLR   6.4       4.9    0.01               K.DILPR.H   6.4       4.9    0.01               DLLPR   6.4       4.9    0.01               K.DLPIR.K   6.4       4.9    0.01               DLPLR   6.4       4.9    0.01               R.EVIPR.S   6.4       4.9    0.01               R.EVLPR.S   6.4       4.9    0.01               R.EVPLR.C   6.4       4.9    0.01               R.IDLPR.K   6.4       4.9    0.01               R.IDPIR.S ``` | |

|  |  |
| --- | --- |
| |  | | --- | | Top scoring peptide matches to query 2011 32: Sum of 4 scans in range 231 (rt=15.7945, f=2, i=43) to 249 (rt=16.6907, f=2, i=46) [\\172.16.3.18\masslynx\2009.PRO\Data\20090529\_12\_qdda.raw] Score greater than 19 indicates homology Score greater than 30 indicates identity  ``` Score    Expect   Delta  Hit  Protein Peptide  12.0       3.5   -0.12   35   P02649 R.GLSAIR.E  11.5         4   -0.08               K.GALAER.Q   5.6        15   -0.05               R.GASEPR.L   5.5        16   -0.08               R.EAGALR.T   5.5        16   -0.08               K.EGAALR.E   5.5        16   -0.08               R.EQAIR.A   5.5        16   -0.08               EQALR   5.4        16   -0.12               R.VASALR.S   4.9        18   -0.08               GLSSPR   4.5        20   -0.12               LGALSR ``` | |

|  |  |
| --- | --- |
| |  | | --- | | Top scoring peptide matches to query 2012 25: Sum of 4 scans in range 233 (rt=15.8938, f=3, i=18) to 251 (rt=16.7899, f=3, i=21) [\\172.16.3.18\masslynx\2009.PRO\Data\20090525\_22\_qdda.raw] Score greater than 17 indicates homology Score greater than 30 indicates identity  ``` Score    Expect   Delta  Hit  Protein Peptide   9.4       6.4   -0.07               K.GALAER.Q   4.1        22   -0.07               QLAER   3.0        28   -0.11               QILSR   3.0        28   -0.11               R.QLISR.N   3.0        28   -0.11               QLLSR   2.5        31   -0.11   35   P02649 R.GLSAIR.E   1.8        37   -0.11               R.AGITVR.M   1.8        37   -0.07               K.AGLEAR.K   1.8        37   -0.11               R.AGLSIR.I   1.8        37   -0.11               M.AGLTVR.D ``` | |

|  |  |
| --- | --- |
| |  | | --- | | Top scoring peptide matches to query 2013 29: Sum of 4 scans in range 229 (rt=15.7082, f=2, i=38) to 247 (rt=16.6042, f=2, i=41) [\\172.16.3.18\masslynx\2009.PRO\Data\20090526\_22\_qdda.raw] Score greater than 19 indicates homology Score greater than 30 indicates identity  ``` Score    Expect   Delta  Hit  Protein Peptide   9.5       6.3   -0.06               K.GALAER.Q   6.4        13   -0.10   35   P02649 R.GLSAIR.E   4.1        22   -0.06               K.ELAGAR.R   4.1        22   -0.06               ELAQR   4.1        22   -0.06               ELGAAR   4.1        22   -0.06               ELQAR   4.0        22   -0.06               QLAER   3.2        27   -0.10               QILSR   3.2        27   -0.10               R.QLISR.N   3.2        27   -0.10               QLLSR ``` | |

|  |  |
| --- | --- |
| |  | | --- | | Top scoring peptide matches to query 2014 26: Sum of 4 scans in range 238 (rt=16.0282, f=3, i=17) to 256 (rt=16.9243, f=3, i=20) [\\172.16.3.18\masslynx\2009.PRO\Data\20090525\_25\_qdda.raw] Score greater than 21 indicates homology Score greater than 30 indicates identity  ``` Score    Expect   Delta  Hit  Protein Peptide  11.2       4.2   -0.06               K.GALAER.Q   8.0       8.9   -0.06               QLAER   6.9        12   -0.06               R.AGEALR.G   6.3        13   -0.10   35   P02649 R.GLSAIR.E   4.9        18   -0.06               R.AVAAER.Q   4.3        21   -0.10               R.AGLSIR.I   4.0        22   -0.03               AGGGGAAR   4.0        22   -0.06               QAIER   4.0        22   -0.06               QALER   3.9        23   -0.10               R.AASVLR.M ``` | |

|  |  |
| --- | --- |
| |  | | --- | | Top scoring peptide matches to query 2015 30: Sum of 4 scans in range 224 (rt=15.4234, f=2, i=42) to 242 (rt=16.3196, f=2, i=45) [\\172.16.3.18\masslynx\2009.PRO\Data\20090528\_24\_qdda.raw] Score greater than 21 indicates homology Score greater than 30 indicates identity  ``` Score    Expect   Delta  Hit  Protein Peptide   8.4         8   -0.08   35   P02649 R.GLSAIR.E   7.6       9.8   -0.04               R.AGEALR.G   5.7        15   -0.04               K.GALAER.Q   5.1        17   -0.08               R.AASVLR.M   3.9        23   -0.08               R.AGLSIR.I   3.6        24   -0.04               K.ELAGAR.R   3.6        24   -0.04               ELAQR   3.6        24   -0.04               ELGAAR   3.6        24   -0.04               ELQAR   3.1        27   -0.04               R.AVAAER.Q ``` | |

|  |  |
| --- | --- |
| |  | | --- | | Top scoring peptide matches to query 2018 35: Sum of 2 scans in range 284 (rt=18.3836, f=4, i=31) to 290 (rt=18.6823, f=4, i=32) [\\172.16.3.18\masslynx\2009.PRO\Data\20090528\_12\_qdda.raw] Score greater than 18 indicates homology Score greater than 30 indicates identity  ``` Score    Expect   Delta  Hit  Protein Peptide  11.6       3.9   -0.00   35   P02649 R.GLSAIR.E  11.2       4.2   -0.00               R.VASALR.S   4.8        19    0.03               GLSSPR   3.5        25   -0.00               R.GLTGLR.L   3.2        27    0.03               R.VASPSR.K   1.7        38   -0.01               K.RTALR.T   0.9        46    0.03               K.GVDGIR.G ``` | |

|  |  |
| --- | --- |
| |  | | --- | | Top scoring peptide matches to query 2019 41: Sum of 4 scans in range 307 (rt=19.495, f=3, i=45) to 325 (rt=20.3911, f=3, i=48) [\\172.16.3.18\masslynx\2009.PRO\Data\20090530\_24\_qdda.raw] Score greater than 18 indicates homology Score greater than 30 indicates identity  ``` Score    Expect   Delta  Hit  Protein Peptide  12.1       3.5   -0.00   35   P02649 R.GLSAIR.E   4.9        18   -0.00               R.VASALR.S   4.5        20    0.04               GLSSPR   3.8        23   -0.00               R.GLTGLR.L   2.8        30    0.04               K.EGAALR.E   0.5        50    0.04               M.GLEAAR.E ``` | |

|  |  |
| --- | --- |
| |  | | --- | | Top scoring peptide matches to query 2162 38: Sum of 4 scans in range 244 (rt=16.6045, f=5, i=21) to 262 (rt=17.5008, f=5, i=24) [\\172.16.3.18\masslynx\2009.PRO\Data\20090522\_33\_qdda.raw] Score greater than 20 indicates homology Score greater than 29 indicates identity  ``` Score    Expect   Delta  Hit  Protein Peptide  14.9       1.3   -0.12    8   P00450 VFNPR   6.8       8.8   -0.12               R.VNFPR.S   5.2        13   -0.07               R.VENDR.E   4.5        15   -0.03               K.NCPPR.V   3.5        19   -0.03               R.GCGPPR.R   2.6        23   -0.08               R.AASMPR.L   2.1        26   -0.10               R.QTVER.R ``` | |

|  |  |
| --- | --- |
| |  | | --- | | Top scoring peptide matches to query 2163 39: Sum of 4 scans in range 249 (rt=16.7615, f=5, i=17) to 267 (rt=17.6576, f=5, i=20) [\\172.16.3.18\masslynx\2009.PRO\Data\20090522\_29\_qdda.raw] Score greater than 25 indicates homology Score greater than 29 indicates identity  ``` Score    Expect   Delta  Hit  Protein Peptide  13.9       1.7   -0.08    8   P00450 VFNPR  11.3       3.1   -0.08               R.VNFPR.S   5.6        11    0.00               K.NCPPR.V   3.5        18   -0.03               R.VENDR.E   2.8        22   -0.08               R.NVFPR.S   2.8        22   -0.09               R.RGFPR.L   2.7        22    0.00               R.GCGPPR.R   2.3        25   -0.08               R.VNPFR.D   2.2        25   -0.01               K.NMDPR.L   0.3        39   -0.04               R.AGGASGGR.E ``` | |

|  |  |
| --- | --- |
| |  | | --- | | Top scoring peptide matches to query 2166 42: Sum of 4 scans in range 279 (rt=18.136, f=3, i=36) to 297 (rt=19.0321, f=3, i=39) [\\172.16.3.18\masslynx\2009.PRO\Data\20090528\_24\_qdda.raw] Score greater than 21 indicates homology Score greater than 27 indicates identity  ``` Score    Expect   Delta  Hit  Protein Peptide  11.4         2   -0.10   20   P02790 FDPVR   7.9       4.5   -0.09               K.CIPVR.D   7.9       4.5   -0.07               K.DMPVR.S   7.9       4.5   -0.09               R.LCVPR.S ``` | |

|  |  |
| --- | --- |
| |  | | --- | | Top scoring peptide matches to query 2167 39: Sum of 4 scans in range 290 (rt=18.7108, f=6, i=21) to 308 (rt=19.6069, f=6, i=24) [\\172.16.3.18\masslynx\2009.PRO\Data\20090529\_15\_qdda.raw] Score greater than 21 indicates homology Score greater than 27 indicates identity  ``` Score    Expect   Delta  Hit  Protein Peptide   9.2       3.3   -0.10   20   P02790 FDPVR   8.0       4.4   -0.08               K.CIPVR.D   8.0       4.4   -0.07               K.DMPVR.S   8.0       4.4   -0.08               R.LCVPR.S ``` | |

|  |  |
| --- | --- |
| |  | | --- | | Top scoring peptide matches to query 2168 37: Sum of 4 scans in range 292 (rt=18.6905, f=3, i=25) to 310 (rt=19.5867, f=3, i=28) [\\172.16.3.18\masslynx\2009.PRO\Data\20090525\_25\_qdda.raw] Score greater than 21 indicates homology Score greater than 27 indicates identity  ``` Score    Expect   Delta  Hit  Protein Peptide  11.6       1.9   -0.10   20   P02790 FDPVR   8.2       4.2   -0.08               K.CIPVR.D   8.2       4.2   -0.06               K.DMPVR.S   8.2       4.2   -0.08               R.LCVPR.S ``` | |

|  |  |
| --- | --- |
| |  | | --- | | Top scoring peptide matches to query 2169 37: Sum of 4 scans in range 309 (rt=19.6666, f=3, i=38) to 327 (rt=20.5627, f=3, i=41) [\\172.16.3.18\masslynx\2009.PRO\Data\20090529\_21\_qdda.raw] Score greater than 21 indicates homology Score greater than 27 indicates identity  ``` Score    Expect   Delta  Hit  Protein Peptide   8.8       3.6   -0.10   20   P02790 FDPVR   8.4         4   -0.08               K.CIPVR.D   8.4         4   -0.06               K.DMPVR.S   8.4         4   -0.08               R.LCVPR.S ``` | |

|  |  |
| --- | --- |
| |  | | --- | | Top scoring peptide matches to query 2171 37: Sum of 4 scans in range 288 (rt=18.6061, f=4, i=23) to 306 (rt=19.5022, f=4, i=26) [\\172.16.3.18\masslynx\2009.PRO\Data\20090525\_22\_qdda.raw] Score greater than 19 indicates homology Score greater than 27 indicates identity  ``` Score    Expect   Delta  Hit  Protein Peptide   6.7       5.8   -0.08   20   P02790 FDPVR   6.2       6.6   -0.07               K.CIPVR.D   6.2       6.6   -0.05               K.DMPVR.S   6.2       6.6   -0.07               R.LCVPR.S ``` | |

|  |  |
| --- | --- |
| |  | | --- | | Top scoring peptide matches to query 2174 42: Sum of 3 scans in range 300 (rt=19.1756, f=2, i=53) to 312 (rt=19.7729, f=2, i=55) [\\172.16.3.18\masslynx\2009.PRO\Data\20090528\_15\_qdda.raw] Score greater than 25 indicates homology Score greater than 27 indicates identity  ``` Score    Expect   Delta  Hit  Protein Peptide  22.3      0.16   -0.05   20   P02790 FDPVR  11.1       2.1   -0.03               K.CIPVR.D  11.1       2.1   -0.01               K.DMPVR.S   9.0       3.4   -0.03               R.LCVPR.S   6.2       6.6   -0.12               R.FIVVR.E   6.2       6.6   -0.12               R.FVLVR.S   6.2       6.6   -0.09               R.MVLVR.N   4.5       9.7    0.00               K.EDDVR.Q   3.6        12   -0.08               K.FPITR.E   3.6        12   -0.05               -.MPITR.M ``` | |

|  |  |
| --- | --- |
| |  | | --- | | Top scoring peptide matches to query 2175 52: Sum of 4 scans in range 306 (rt=19.5667, f=5, i=28) to 324 (rt=20.4628, f=5, i=31) [\\172.16.3.18\masslynx\2009.PRO\Data\20090525\_13\_qdda.raw] Score greater than 21 indicates homology Score greater than 27 indicates identity  ``` Score    Expect   Delta  Hit  Protein Peptide  11.0       2.2   -0.05   20   P02790 FDPVR   7.6       4.7   -0.03               K.CIPVR.D   7.6       4.7   -0.01               K.DMPVR.S   7.6       4.7   -0.03               R.LCVPR.S   0.2        26   -0.04               R.MLGISP.- ``` | |

|  |  |
| --- | --- |
| |  | | --- | | Top scoring peptide matches to query 2176 61: Sum of 2 scans in range 381 (rt=22.9548, f=5, i=15) to 387 (rt=23.2535, f=5, i=16) [\\172.16.3.18\masslynx\2009.PRO\Data\20090529\_27\_qdda.raw] Score greater than 18 indicates homology Score greater than 27 indicates identity  ``` Score    Expect   Delta  Hit  Protein Peptide   7.1       5.4   -0.04   20   P02790 FDPVR   5.5       7.8   -0.01               K.DMPVR.S   4.0        11   -0.03               K.CIPVR.D   1.6        19   -0.03               R.LCVPR.S ``` | |

|  |  |
| --- | --- |
| |  | | --- | | Top scoring peptide matches to query 2178 48: Sum of 4 scans in range 323 (rt=20.3714, f=6, i=23) to 341 (rt=21.2674, f=6, i=26) [\\172.16.3.18\masslynx\2009.PRO\Data\20090526\_13\_qdda.raw] Score greater than 15 indicates homology Score greater than 27 indicates identity  ``` Score    Expect   Delta  Hit  Protein Peptide   6.3       6.5   -0.03   20   P02790 FDPVR   1.8        18   -0.02               K.CIPVR.D   1.8        18    0.00               K.DMPVR.S   1.1        21   -0.02               R.LCVPR.S ``` | |

|  |  |
| --- | --- |
| |  | | --- | | Top scoring peptide matches to query 2182 40: Sum of 3 scans in range 308 (rt=19.5653, f=4, i=33) to 320 (rt=20.1627, f=4, i=35) [\\172.16.3.18\masslynx\2009.PRO\Data\20090528\_12\_qdda.raw] Score greater than 21 indicates homology Score greater than 27 indicates identity  ``` Score    Expect   Delta  Hit  Protein Peptide  12.7       1.5   -0.02   20   P02790 FDPVR   7.8       4.5   -0.00               K.CIPVR.D   7.8       4.5    0.02               K.DMPVR.S   7.8       4.5   -0.00               R.LCVPR.S   1.3        21   -0.09               R.FVLVR.S   1.3        21   -0.06               R.MVLVR.N   0.8        23   -0.01               R.MLGISP.- ``` | |

|  |  |
| --- | --- |
| |  | | --- | | Top scoring peptide matches to query 2185 70: Sum of 3 scans in range 367 (rt=22.2796, f=6, i=22) to 377 (rt=22.7774, f=6, i=24) [\\172.16.3.18\masslynx\2009.PRO\Data\20090530\_27\_qdda.raw] Score greater than 13 indicates homology Score greater than 27 indicates identity  ``` Score    Expect   Delta  Hit  Protein Peptide   3.5        12   -0.01   20   P02790 FDPVR   0.0        27    0.01               K.CIPVR.D   0.0        27    0.03               K.DMPVR.S   0.0        27    0.01               R.LCVPR.S ``` | |

|  |  |
| --- | --- |
| |  | | --- | | Top scoring peptide matches to query 2340 63: Sum of 8 scans in range 411 (rt=24.7205, f=2, i=89) to 433 (rt=25.8158, f=6, i=46) [\\172.16.3.18\masslynx\2009.PRO\Data\20090522\_37\_qdda.raw] Score greater than 23 indicates homology Score greater than 28 indicates identity  ``` Score    Expect   Delta  Hit  Protein Peptide  15.0       1.2   -0.16    2   P01023 K.VIFIR.G  15.0       1.2   -0.16               VLFLR  15.0       1.2   -0.13               R.VLMLR.N   9.6       4.1   -0.16               R.VIIFR.L   9.6       4.1   -0.16               VLLFR   8.1       5.8   -0.09               VIMER   8.1       5.8   -0.09               K.VLEMR.G   8.1       5.8   -0.09               R.VLMER.N   8.1       5.8   -0.12               R.VLYPR.V   7.8       6.1   -0.13               K.IVMIR.D ``` | |

|  |  |
| --- | --- |
| |  | | --- | | Top scoring peptide matches to query 2341 59: Sum of 4 scans in range 415 (rt=24.7734, f=2, i=79) to 433 (rt=25.6695, f=2, i=82) [\\172.16.3.18\masslynx\2009.PRO\Data\20090526\_28\_qdda.raw] Score greater than 23 indicates homology Score greater than 28 indicates identity  ``` Score    Expect   Delta  Hit  Protein Peptide  15.2       1.1   -0.13    2   P01023 K.VIFIR.G  15.2       1.1   -0.13               VLFLR  15.2       1.1   -0.09               R.VLMLR.N   9.8       3.9   -0.13               R.VIIFR.L   9.8       3.9   -0.13               VLLFR   8.3       5.5   -0.06               VIMER   8.3       5.5   -0.06               K.VLEMR.G   8.3       5.5   -0.06               R.VLMER.N   8.3       5.5   -0.09               R.VLYPR.V   7.9         6   -0.09               K.IVMIR.D ``` | |

|  |  |
| --- | --- |
| |  | | --- | | Top scoring peptide matches to query 2342 61: Sum of 8 scans in range 425 (rt=25.4258, f=2, i=64) to 446 (rt=26.4712, f=5, i=44) [\\172.16.3.18\masslynx\2009.PRO\Data\20090526\_19\_qdda.raw] Score greater than 23 indicates homology Score greater than 28 indicates identity  ``` Score    Expect   Delta  Hit  Protein Peptide  15.3       1.1   -0.12    2   P01023 K.VIFIR.G  15.3       1.1   -0.12               VLFLR  15.3       1.1   -0.09               R.VLMLR.N  10.0       3.7   -0.12               R.VIIFR.L  10.0       3.7   -0.12               VLLFR   8.5       5.3   -0.05               VIMER   8.5       5.3   -0.05               K.VLEMR.G   8.5       5.3   -0.05               R.VLMER.N   8.5       5.3   -0.08               R.VLYPR.V   8.1       5.8   -0.09               K.IVMIR.D ``` | |

|  |  |
| --- | --- |
| |  | | --- | | Top scoring peptide matches to query 2343 56: Sum of 4 scans in range 429 (rt=25.6063, f=2, i=91) to 447 (rt=26.5025, f=2, i=94) [\\172.16.3.18\masslynx\2009.PRO\Data\20090525\_19\_qdda.raw] Score greater than 23 indicates homology Score greater than 28 indicates identity  ``` Score    Expect   Delta  Hit  Protein Peptide  15.2       1.1   -0.09    2   P01023 K.VIFIR.G  15.2       1.1   -0.09               VLFLR  15.2       1.1   -0.06               R.VLMLR.N   9.8       3.9   -0.09               R.VIIFR.L   9.8       3.9   -0.09               VLLFR   8.3       5.5   -0.02               VIMER   8.3       5.5   -0.02               K.VLEMR.G   8.3       5.5   -0.02               R.VLMER.N   8.3       5.5   -0.06               R.VLYPR.V   8.1       5.8   -0.06               K.IVMIR.D ``` | |

|  |  |
| --- | --- |
| |  | | --- | | Top scoring peptide matches to query 2344 64: Sum of 4 scans in range 422 (rt=25.2127, f=3, i=46) to 440 (rt=26.109, f=3, i=49) [\\172.16.3.18\masslynx\2009.PRO\Data\20090525\_22\_qdda.raw] Score greater than 23 indicates homology Score greater than 28 indicates identity  ``` Score    Expect   Delta  Hit  Protein Peptide  14.9       1.2   -0.09    2   P01023 K.VIFIR.G  14.9       1.2   -0.09               VLFLR  14.9       1.2   -0.06               R.VLMLR.N   9.5       4.1   -0.09               R.VIIFR.L   9.5       4.1   -0.09               VLLFR   8.0       5.9   -0.02               VIMER   8.0       5.9   -0.02               K.VLEMR.G   8.0       5.9   -0.02               R.VLMER.N   8.0       5.9   -0.06               R.VLYPR.V   7.7       6.2   -0.06               K.IVMIR.D ``` | |

|  |  |
| --- | --- |
| |  | | --- | | Top scoring peptide matches to query 2345 61: Sum of 8 scans in range 442 (rt=26.2153, f=2, i=67) to 460 (rt=27.1114, f=3, i=73) [\\172.16.3.18\masslynx\2009.PRO\Data\20090529\_18\_qdda.raw] Score greater than 23 indicates homology Score greater than 28 indicates identity  ``` Score    Expect   Delta  Hit  Protein Peptide  15.4       1.1   -0.09    2   P01023 K.VIFIR.G  15.4       1.1   -0.09               VLFLR  15.4       1.1   -0.06               R.VLMLR.N  10.1       3.7   -0.09               R.VIIFR.L  10.1       3.7   -0.09               VLLFR   8.6       5.1   -0.02               VIMER   8.6       5.1   -0.02               K.VLEMR.G   8.6       5.1   -0.02               R.VLMER.N   8.6       5.1   -0.06               R.VLYPR.V   8.1       5.7   -0.06               K.IVMIR.D ``` | |

|  |  |
| --- | --- |
| |  | | --- | | Top scoring peptide matches to query 2346 63: Sum of 9 scans in range 426 (rt=25.2403, f=2, i=74) to 450 (rt=26.4278, f=7, i=55) [\\172.16.3.18\masslynx\2009.PRO\Data\20090525\_28\_qdda.raw] Score greater than 23 indicates homology Score greater than 28 indicates identity  ``` Score    Expect   Delta  Hit  Protein Peptide  14.9       1.2   -0.09    2   P01023 K.VIFIR.G  14.9       1.2   -0.09               VLFLR  14.9       1.2   -0.06               R.VLMLR.N   9.6         4   -0.09               R.VIIFR.L   9.6         4   -0.09               VLLFR   8.1       5.8   -0.02               VIMER   8.1       5.8   -0.02               K.VLEMR.G   8.1       5.8   -0.02               R.VLMER.N   8.1       5.8   -0.05               R.VLYPR.V   7.7       6.3   -0.06               K.IVMIR.D ``` | |

|  |  |
| --- | --- |
| |  | | --- | | Top scoring peptide matches to query 2348 62: Sum of 8 scans in range 442 (rt=26.2151, f=2, i=68) to 462 (rt=27.2108, f=4, i=50) [\\172.16.3.18\masslynx\2009.PRO\Data\20090528\_18\_qdda.raw] Score greater than 23 indicates homology Score greater than 28 indicates identity  ``` Score    Expect   Delta  Hit  Protein Peptide  15.3       1.1   -0.08    2   P01023 K.VIFIR.G  15.3       1.1   -0.08               VLFLR  15.3       1.1   -0.05               R.VLMLR.N  10.0       3.7   -0.08               R.VIIFR.L  10.0       3.7   -0.08               VLLFR   8.5       5.2   -0.02               VIMER   8.5       5.2   -0.02               K.VLEMR.G   8.5       5.2   -0.02               R.VLMER.N   8.5       5.2   -0.05               R.VLYPR.V   8.1       5.8   -0.05               K.IVMIR.D ``` | |

|  |  |
| --- | --- |
| |  | | --- | | Top scoring peptide matches to query 2349 67: Sum of 4 scans in range 422 (rt=25.2132, f=5, i=41) to 440 (rt=26.1095, f=5, i=44) [\\172.16.3.18\masslynx\2009.PRO\Data\20090529\_12\_qdda.raw] Score greater than 23 indicates homology Score greater than 28 indicates identity  ``` Score    Expect   Delta  Hit  Protein Peptide  15.0       1.2   -0.08    2   P01023 K.VIFIR.G  15.0       1.2   -0.08               VLFLR  15.0       1.2   -0.05               R.VLMLR.N   9.5       4.1   -0.08               R.VIIFR.L   9.5       4.1   -0.08               VLLFR   8.0       5.9   -0.01               VIMER   8.0       5.9   -0.01               K.VLEMR.G   8.0       5.9   -0.01               R.VLMER.N   8.0       5.9   -0.04               R.VLYPR.V   8.0       5.9   -0.05               K.IVMIR.D ``` | |

|  |  |
| --- | --- |
| |  | | --- | | Top scoring peptide matches to query 2350 76: Sum of 2 scans in range 450 (rt=26.7115, f=3, i=63) to 456 (rt=27.0102, f=3, i=64) [\\172.16.3.18\masslynx\2009.PRO\Data\20090522\_17\_qdda.raw] Score greater than 24 indicates homology Score greater than 28 indicates identity  ``` Score    Expect   Delta  Hit  Protein Peptide  13.3       1.8   -0.06    2   P01023 K.VIFIR.G  13.3       1.8   -0.06               VLFLR  13.3       1.8   -0.02               R.VLMLR.N  11.2       2.8   -0.06               K.VFIIR.K  11.2       2.8   -0.06               K.VFLLR.R  11.2       2.8   -0.02               R.VMIIR.T  11.2       2.8   -0.02               R.VMLLR.G   8.4       5.4    0.01               R.VEMIR.Q   8.4       5.4    0.01               K.VEMLR.L   6.9       7.6    0.01               VIMER ``` | |

|  |  |
| --- | --- |
| |  | | --- | | Top scoring peptide matches to query 2352 63: Sum of 4 scans in range 421 (rt=25.1464, f=3, i=61) to 439 (rt=26.0424, f=3, i=64) [\\172.16.3.18\masslynx\2009.PRO\Data\20090526\_25\_qdda.raw] Score greater than 20 indicates homology Score greater than 28 indicates identity  ``` Score    Expect   Delta  Hit  Protein Peptide   8.3       5.5   -0.05    2   P01023 K.VIFIR.G   8.3       5.5   -0.05               VLFLR   8.3       5.5   -0.02               R.VLMLR.N   8.0       5.9    0.05               R.VPMER.E   8.0       5.9   -0.05               K.VFIIR.K   8.0       5.9   -0.05               K.VFLLR.R   8.0       5.9   -0.02               R.VMIIR.T   8.0       5.9   -0.02               R.VMLLR.G   7.2         7    0.02               VIMER   7.2         7    0.02               R.VLMER.N ``` | |

|  |  |
| --- | --- |
| |  | | --- | | Top scoring peptide matches to query 2353 60: Sum of 4 scans in range 429 (rt=25.4448, f=4, i=41) to 447 (rt=26.341, f=4, i=44) [\\172.16.3.18\masslynx\2009.PRO\Data\20090530\_12\_qdda.raw] Score greater than 23 indicates homology Score greater than 28 indicates identity  ``` Score    Expect   Delta  Hit  Protein Peptide  15.1       1.2   -0.05    2   P01023 K.VIFIR.G  15.1       1.2   -0.05               VLFLR  15.1       1.2   -0.02               R.VLMLR.N   9.6       4.1   -0.05               R.VIIFR.L   9.6       4.1   -0.05               VLLFR   8.1       5.8    0.02               VIMER   8.1       5.8    0.02               K.VLEMR.G   8.1       5.8    0.02               R.VLMER.N   8.1       5.8   -0.01               R.VLYPR.V   8.0       5.9   -0.02               K.IVMIR.D ``` | |

|  |  |
| --- | --- |
| |  | | --- | | Top scoring peptide matches to query 2354 71: Sum of 4 scans in range 436 (rt=26.0077, f=6, i=45) to 454 (rt=26.9037, f=6, i=48) [\\172.16.3.18\masslynx\2009.PRO\Data\20090522\_25\_qdda.raw] Score greater than 21 indicates homology Score greater than 28 indicates identity  ``` Score    Expect   Delta  Hit  Protein Peptide  12.1       2.3   -0.05    2   P01023 K.VIFIR.G  12.1       2.3   -0.05               VLFLR  12.1       2.3   -0.01               R.VLMLR.N   7.4       6.7   -0.05               K.VFIIR.K   7.4       6.7   -0.05               K.VFLLR.R   7.4       6.7   -0.01               R.VMIIR.T   7.4       6.7   -0.01               R.VMLLR.G   5.2        11   -0.01               R.VLYPR.V   5.1        12    0.02               R.VEMIR.Q   5.1        12    0.02               K.VEMLR.L ``` | |

|  |  |
| --- | --- |
| |  | | --- | | Top scoring peptide matches to query 2355 73: Sum of 4 scans in range 450 (rt=26.6126, f=4, i=49) to 468 (rt=27.5086, f=4, i=52) [\\172.16.3.18\masslynx\2009.PRO\Data\20090525\_16\_qdda.raw] Score greater than 16 indicates homology Score greater than 28 indicates identity  ``` Score    Expect   Delta  Hit  Protein Peptide   4.2        14   -0.05    2   P01023 K.VIFIR.G   4.2        14   -0.05               VLFLR   4.2        14   -0.01               R.VLMLR.N   3.8        16   -0.01               R.VLYPR.V   2.1        23    0.05               R.GWAGTR.E   2.1        23    0.05               R.GWTGAR.T   1.7        25    0.02               VIMER   1.7        25    0.02               R.VLMER.N ``` | |

|  |  |
| --- | --- |
| |  | | --- | | Top scoring peptide matches to query 2356 60: Sum of 8 scans in range 418 (rt=24.9914, f=2, i=76) to 439 (rt=26.0368, f=5, i=44) [\\172.16.3.18\masslynx\2009.PRO\Data\20090528\_21\_qdda.raw] Score greater than 22 indicates homology Score greater than 28 indicates identity  ``` Score    Expect   Delta  Hit  Protein Peptide  14.2       1.4   -0.04    2   P01023 K.VIFIR.G  14.2       1.4   -0.04               VLFLR  14.2       1.4   -0.01               R.VLMLR.N   8.9       4.8   -0.04               R.VIIFR.L   8.9       4.8   -0.04               VLLFR   7.5       6.6    0.03               VIMER   7.5       6.6    0.03               R.VLMER.N   7.4       6.7    0.03               K.VLEMR.G   7.4       6.7   -0.01               R.VLYPR.V   7.1       7.2   -0.01               K.IVMIR.D ``` | |

|  |  |
| --- | --- |
| |  | | --- | | Top scoring peptide matches to query 2357 91: Sum of 6 scans in range 517 (rt=29.8997, f=2, i=86) to 539 (rt=30.982, f=3, i=86) [\\172.16.3.18\masslynx\2009.PRO\Data\20090529\_24\_qdda.raw] Score greater than 21 indicates homology Score greater than 28 indicates identity  ``` Score    Expect   Delta  Hit  Protein Peptide  14.7       1.3   -0.04    2   P01023 K.VIFIR.G  14.7       1.3   -0.04               VLFLR  14.7       1.3   -0.01               R.VLMLR.N   7.7       6.3   -0.01               K.IVMIR.D   7.7       6.3   -0.04               K.LVFIR.N   7.6       6.4    0.03               VIMER   7.6       6.4    0.03               R.VLMER.N   6.3       8.6   -0.04               K.VFIIR.K   6.3       8.6   -0.04               K.VFLLR.R   6.3       8.6   -0.01               R.VMIIR.T ``` | |

|  |  |
| --- | --- |
| |  | | --- | | Top scoring peptide matches to query 2359 75: Sum of 3 scans in range 454 (rt=26.7638, f=3, i=58) to 466 (rt=27.3612, f=3, i=60) [\\172.16.3.18\masslynx\2009.PRO\Data\20090528\_15\_qdda.raw] Score greater than 24 indicates homology Score greater than 28 indicates identity  ``` Score    Expect   Delta  Hit  Protein Peptide  15.4       1.1   -0.04    2   P01023 K.VIFIR.G  15.4       1.1   -0.04               VLFLR  15.4       1.1   -0.00               R.VLMLR.N  10.1       3.6   -0.04               R.VIIFR.L  10.1       3.6   -0.04               VLLFR   8.6       5.1    0.03               VIMER   8.6       5.1    0.03               K.VLEMR.G   8.6       5.1    0.03               R.VLMER.N   8.6       5.1   -0.00               R.VLYPR.V   8.2       5.6   -0.00               K.IVMIR.D ``` | |

|  |  |
| --- | --- |
| |  | | --- | | Top scoring peptide matches to query 2362 126: Sum of 3 scans in range 557 (rt=31.364, f=3, i=92) to 567 (rt=31.8618, f=3, i=94) [\\172.16.3.18\masslynx\2009.PRO\Data\20090529\_30\_qdda.raw] Score greater than 13 indicates homology Score greater than 28 indicates identity  ``` Score    Expect   Delta  Hit  Protein Peptide   0.3        35   -0.03    2   P01023 K.VIFIR.G   0.3        35   -0.03               VLFLR   0.3        35   -0.00               R.VLMLR.N ``` | |

|  |  |
| --- | --- |
| |  | | --- | | Top scoring peptide matches to query 2363 83: Sum of 4 scans in range 486 (rt=28.3875, f=3, i=80) to 500 (rt=29.0844, f=3, i=83) [\\172.16.3.18\masslynx\2009.PRO\Data\20090526\_13\_qdda.raw] Score greater than 24 indicates homology Score greater than 28 indicates identity  ``` Score    Expect   Delta  Hit  Protein Peptide  19.4      0.42   -0.03    2   P01023 K.VIFIR.G  19.4      0.42   -0.03               VLFLR  19.4      0.42    0.00               R.VLMLR.N  10.1       3.6   -0.03               R.VIIFR.L  10.1       3.6   -0.03               VLLFR   9.9       3.8   -0.03               K.VFIIR.K   9.9       3.8   -0.03               K.VFLLR.R   9.9       3.8    0.00               R.VMIIR.T   9.9       3.8    0.00               R.VMLLR.G   8.6       5.1    0.04               VIMER ``` | |

|  |  |
| --- | --- |
| |  | | --- | | Top scoring peptide matches to query 2365 110: Sum of 4 scans in range 561 (rt=31.7503, f=2, i=143) to 569 (rt=32.1486, f=5, i=46) [\\172.16.3.18\masslynx\2009.PRO\Data\20090529\_27\_qdda.raw] Score greater than 13 indicates homology Score greater than 28 indicates identity  ``` Score    Expect   Delta  Hit  Protein Peptide   2.2        22   -0.02    2   P01023 K.VIFIR.G   2.2        22   -0.02               VLFLR   2.2        22    0.01               R.VLMLR.N   0.3        34    0.05               VIMER   0.3        34    0.05               R.VLMER.N ``` | |

|  |  |
| --- | --- |
| |  | | --- | | Top scoring peptide matches to query 2366 95: Sum of 7 scans in range 507 (rt=29.3139, f=3, i=80) to 522 (rt=30.0606, f=3, i=83) [\\172.16.3.18\masslynx\2009.PRO\Data\20090530\_24\_qdda.raw] Score greater than 26 indicates homology Score greater than 28 indicates identity  ``` Score    Expect   Delta  Hit  Protein Peptide  16.5      0.82   -0.02    2   P01023 K.VIFIR.G  16.5      0.82   -0.02               VLFLR  16.5      0.82    0.02               R.VLMLR.N  12.8       1.9    0.02               K.IVMIR.D  12.8       1.9   -0.02               K.LVFIR.N   9.8       3.9   -0.02               K.VFIIR.K   9.8       3.9   -0.02               K.VFLLR.R   9.8       3.9    0.02               R.VMIIR.T   9.8       3.9    0.02               R.VMLLR.G   8.2       5.6    0.05               VIMER ``` | |

|  |  |
| --- | --- |
| |  | | --- | | Top scoring peptide matches to query 2369 70: Sum of 4 scans in range 454 (rt=26.784, f=2, i=67) to 472 (rt=27.68, f=2, i=70) [\\172.16.3.18\masslynx\2009.PRO\Data\20090530\_18\_qdda.raw] Score greater than 20 indicates homology Score greater than 28 indicates identity  ``` Score    Expect   Delta  Hit  Protein Peptide  11.4       2.7   -0.01    2   P01023 K.VIFIR.G  11.4       2.7   -0.01               VLFLR  11.4       2.7    0.03               R.VLMLR.N   7.1       7.1    0.06               VIMER   7.1       7.1    0.06               R.VLMER.N   5.6        10   -0.01               R.VIIFR.L   5.6        10   -0.01               VLLFR   5.6        10   -0.01               K.VFIIR.K   5.6        10   -0.01               K.VFLLR.R   5.6        10    0.03               R.VMIIR.T ``` | |

|  |  |
| --- | --- |
| |  | | --- | | Top scoring peptide matches to query 2370 82: Sum of 4 scans in range 510 (rt=29.4104, f=3, i=102) to 526 (rt=30.2069, f=3, i=105) [\\172.16.3.18\masslynx\2009.PRO\Data\20090526\_10\_qdda.raw] Score greater than 23 indicates homology Score greater than 28 indicates identity  ``` Score    Expect   Delta  Hit  Protein Peptide  15.8      0.97   -0.00    2   P01023 K.VIFIR.G  15.8      0.97   -0.00               VLFLR  15.8      0.97    0.03               R.VLMLR.N   9.3       4.4   -0.00               K.VFIIR.K   9.3       4.4   -0.00               K.VFLLR.R   9.3       4.4    0.03               R.VMIIR.T   9.3       4.4    0.03               R.VMLLR.G   7.4       6.8    0.03               K.IVMIR.D   7.4       6.8   -0.00               K.LVFIR.N   7.0       7.4    0.07               VIMER ``` | |

|  |  |
| --- | --- |
| |  | | --- | | Top scoring peptide matches to query 2371 121: Sum of 6 scans in range 536 (rt=30.4988, f=2, i=127) to 546 (rt=30.9966, f=4, i=59) [\\172.16.3.18\masslynx\2009.PRO\Data\20090530\_27\_qdda.raw] Score greater than 22 indicates homology Score greater than 28 indicates identity  ``` Score    Expect   Delta  Hit  Protein Peptide  12.0       2.3   -0.00    2   P01023 K.VIFIR.G  12.0       2.3   -0.00               VLFLR  12.0       2.3    0.03               R.VLMLR.N   8.7       4.9   -0.00               K.VFIIR.K   8.7       4.9   -0.00               K.VFLLR.R   8.7       4.9    0.03               R.VMIIR.T   8.7       4.9    0.03               R.VMLLR.G   6.0       9.2    0.03               K.IVMIR.D   6.0       9.2   -0.00               K.LVFIR.N   5.7       9.9    0.07               R.VEMIR.Q ``` | |

|  |  |
| --- | --- |
| |  | | --- | | Top scoring peptide matches to query 2372 83: Sum of 8 scans in range 525 (rt=30.1296, f=3, i=85) to 540 (rt=30.8763, f=6, i=47) [\\172.16.3.18\masslynx\2009.PRO\Data\20090528\_09\_qdda.raw] Score greater than 19 indicates homology Score greater than 28 indicates identity  ``` Score    Expect   Delta  Hit  Protein Peptide   6.8       7.7   -0.00               K.VFIIR.K   6.8       7.7   -0.00               K.VFLLR.R   6.8       7.7    0.03               R.VMIIR.T   6.8       7.7    0.03               R.VMLLR.G   6.6       8.1   -0.00    2   P01023 K.VIFIR.G   6.6       8.1   -0.00               VLFLR   6.6       8.1    0.03               R.VLMLR.N   6.4       8.5    0.07               K.VFPER.S   6.0       9.3    0.07               VIMER   6.0       9.3    0.07               R.VLMER.N ``` | |

|  |  |
| --- | --- |
| |  | | --- | | Top scoring peptide matches to query 2374 92: Sum of 4 scans in range 520 (rt=29.6999, f=4, i=52) to 531 (rt=30.2475, f=4, i=55) [\\172.16.3.18\masslynx\2009.PRO\Data\20090528\_06\_qdda.raw] Score greater than 13 indicates homology Score greater than 28 indicates identity  ``` Score    Expect   Delta  Hit  Protein Peptide   0.0        37    0.01    2   P01023 K.VIFIR.G   0.0        37    0.01               VLFLR   0.0        37    0.04               R.VLMLR.N ``` | |

|  |  |
| --- | --- |
| |  | | --- | | Top scoring peptide matches to query 2379 42: Sum of 4 scans in range 319 (rt=20.0217, f=3, i=29) to 337 (rt=20.9181, f=3, i=32) [\\172.16.3.18\masslynx\2009.PRO\Data\20090525\_25\_qdda.raw] Score greater than 19 indicates homology Score greater than 27 indicates identity  ``` Score    Expect   Delta  Hit  Protein Peptide  10.8       2.5   -0.05   12   P0C0L4 R.NFLVR.A   5.4       8.8    0.02               K.NFDPR.L   5.2       9.3   -0.03               K.MVRSR.G   5.1       9.4    0.04               R.TQEDR.V   3.3        14    0.03               R.GGGAGSSR.V   3.3        14   -0.02               -.MAALSR.A   3.3        14    0.02               K.GGMEVR.N   3.3        14    0.02               NMEVR   3.0        15   -0.02               K.AAMLSR.F   3.0        15   -0.03               R.ATTLSR.G ``` | |

|  |  |
| --- | --- |
| |  | | --- | | Top scoring peptide matches to query 2382 49: Sum of 4 scans in range 309 (rt=19.6165, f=6, i=25) to 327 (rt=20.5126, f=6, i=28) [\\172.16.3.18\masslynx\2009.PRO\Data\20090528\_24\_qdda.raw] Score greater than 19 indicates homology Score greater than 27 indicates identity  ``` Score    Expect   Delta  Hit  Protein Peptide  12.9       1.6   -0.04   12   P0C0L4 R.NFLVR.A   6.1       7.5    0.04               K.NFDPR.L   5.1       9.4    0.05               R.TQEDR.V   5.0       9.8    0.03               K.GGMEVR.N   5.0       9.8    0.00               R.NPYVR.M   4.7        10   -0.00               R.NVLMR.R   4.6        11    0.03               K.NVSESL.-   3.8        13    0.04               R.GDGPFR.L   3.8        13   -0.04               R.NLFVR.K   3.8        13    0.03               NMEVR ``` | |

|  |  |
| --- | --- |
| |  | | --- | | Top scoring peptide matches to query 2387 24: Sum of 4 scans in range 213 (rt=14.9753, f=4, i=26) to 231 (rt=15.8713, f=4, i=29) [\\172.16.3.18\masslynx\2009.PRO\Data\20090526\_19\_qdda.raw] Score greater than 14 indicates homology Score greater than 29 indicates identity  ``` Score    Expect   Delta  Hit  Protein Peptide  11.6       3.1   -0.03   13   P05155 R.VYDPR.A   0.9        36   -0.03               K.VDYPR.D   0.7        38   -0.11               VYLVR   0.2        43   -0.03               R.TFEPR.L   0.0        45    0.04               R.GGCGGPR.A   0.0        45    0.04               R.GNGCPR.K ``` | |

|  |  |
| --- | --- |
| |  | | --- | | Top scoring peptide matches to query 2389 24: Sum of 4 scans in range 236 (rt=16.0061, f=4, i=15) to 254 (rt=16.9022, f=4, i=18) [\\172.16.3.18\masslynx\2009.PRO\Data\20090530\_15\_qdda.raw] Score greater than 21 indicates homology Score greater than 29 indicates identity  ``` Score    Expect   Delta  Hit  Protein Peptide   8.5       6.4   -0.02   13   P05155 R.VYDPR.A ``` | |

|  |  |
| --- | --- |
| |  | | --- | | Top scoring peptide matches to query 2430 58: Sum of 4 scans in range 354 (rt=21.937, f=2, i=73) to 372 (rt=22.8332, f=2, i=76) [\\172.16.3.18\masslynx\2009.PRO\Data\20090522\_29\_qdda.raw] Score greater than 22 indicates homology Score greater than 25 indicates identity  ``` Score    Expect   Delta  Hit  Protein Peptide  10.4       1.6   -0.13    1   P01024 K.LLPVGR.T   9.6       1.9   -0.14               R.IIPRR.F   9.6       1.9   -0.13               K.ILGVPR.S   9.6       1.9   -0.13               K.ILPGVR.I   9.6       1.9   -0.14               LLPRR   9.6       1.9   -0.14               LLRPR ``` | |

|  |  |
| --- | --- |
| |  | | --- | | Top scoring peptide matches to query 2431 57: Sum of 4 scans in range 350 (rt=21.8298, f=3, i=39) to 368 (rt=22.7258, f=3, i=42) [\\172.16.3.18\masslynx\2009.PRO\Data\20090522\_33\_qdda.raw] Score greater than 15 indicates homology Score greater than 25 indicates identity  ``` Score    Expect   Delta  Hit  Protein Peptide  11.4       1.2   -0.13    1   P01024 K.LLPVGR.T  11.2       1.3   -0.14               R.IIPRR.F  11.2       1.3   -0.13               K.ILGVPR.S  11.2       1.3   -0.13               K.ILPGVR.I  11.2       1.3   -0.14               LLPRR  11.2       1.3   -0.14               LLRPR   1.4        12   -0.13               K.IVPLGR.K   1.4        12   -0.06               LPPDGR   1.4        12   -0.13               R.LPVLGR.D ``` | |

|  |  |
| --- | --- |
| |  | | --- | | Top scoring peptide matches to query 2432 51: Sum of 8 scans in range 366 (rt=22.4553, f=2, i=51) to 385 (rt=23.4011, f=3, i=64) [\\172.16.3.18\masslynx\2009.PRO\Data\20090529\_15\_qdda.raw] Score greater than 22 indicates homology Score greater than 25 indicates identity  ``` Score    Expect   Delta  Hit  Protein Peptide   9.6       1.9   -0.13               R.IIPRR.F   9.6       1.9   -0.12               K.ILGVPR.S   9.6       1.9   -0.12               K.ILPGVR.I   9.6       1.9   -0.13               LLPRR   9.6       1.9   -0.12    1   P01024 K.LLPVGR.T   9.6       1.9   -0.13               LLRPR ``` | |

|  |  |
| --- | --- |
| |  | | --- | | Top scoring peptide matches to query 2433 57: Sum of 8 scans in range 365 (rt=22.4012, f=2, i=63) to 385 (rt=23.3968, f=4, i=41) [\\172.16.3.18\masslynx\2009.PRO\Data\20090529\_12\_qdda.raw] Score greater than 23 indicates homology Score greater than 25 indicates identity  ``` Score    Expect   Delta  Hit  Protein Peptide  12.1         1   -0.11    1   P01024 K.LLPVGR.T   9.8       1.8   -0.12               R.IIPRR.F   9.8       1.8   -0.11               K.ILGVPR.S   9.8       1.8   -0.11               K.ILPGVR.I   9.8       1.8   -0.12               LLPRR   9.8       1.8   -0.12               LLRPR   1.4        12   -0.11               K.IVPLGR.K   1.4        12   -0.04               LPPDGR   1.4        12   -0.11               R.LPVLGR.D ``` | |

|  |  |
| --- | --- |
| |  | | --- | | Top scoring peptide matches to query 2434 50: Sum of 8 scans in range 373 (rt=22.6829, f=2, i=70) to 395 (rt=23.7781, f=6, i=36) [\\172.16.3.18\masslynx\2009.PRO\Data\20090530\_12\_qdda.raw] Score greater than 22 indicates homology Score greater than 25 indicates identity  ``` Score    Expect   Delta  Hit  Protein Peptide  11.3       1.3   -0.10    1   P01024 K.LLPVGR.T   9.7       1.8   -0.11               R.IIPRR.F   9.7       1.8   -0.10               K.ILGVPR.S   9.7       1.8   -0.10               K.ILPGVR.I   9.7       1.8   -0.11               LLPRR   9.7       1.8   -0.11               LLRPR ``` | |

|  |  |
| --- | --- |
| |  | | --- | | Top scoring peptide matches to query 2435 29: Sum of 4 scans in range 187 (rt=13.6043, f=3, i=29) to 203 (rt=14.4008, f=3, i=32) [\\172.16.3.18\masslynx\2009.PRO\Data\20090525\_\_07\_qdda.raw] Score greater than 17 indicates homology Score greater than 25 indicates identity  ``` Score    Expect   Delta  Hit  Protein Peptide   4.9       5.5   -0.02   20   P02790 R.GEVPPR.Y ``` | |

|  |  |
| --- | --- |
| |  | | --- | | Top scoring peptide matches to query 2436 53: Sum of 8 scans in range 386 (rt=23.4609, f=2, i=60) to 405 (rt=24.4067, f=5, i=37) [\\172.16.3.18\masslynx\2009.PRO\Data\20090529\_21\_qdda.raw] Score greater than 22 indicates homology Score greater than 25 indicates identity  ``` Score    Expect   Delta  Hit  Protein Peptide   9.5       1.9   -0.10               R.IIPRR.F   9.5       1.9   -0.09               K.ILGVPR.S   9.5       1.9   -0.09               K.ILPGVR.I   9.5       1.9   -0.10               LLPRR   9.5       1.9   -0.09    1   P01024 K.LLPVGR.T   9.5       1.9   -0.10               LLRPR ``` | |

|  |  |
| --- | --- |
| |  | | --- | | Top scoring peptide matches to query 2438 14: Sum of 4 scans in range 161 (rt=12.3534, f=4, i=7) to 177 (rt=13.1499, f=4, i=10) [\\172.16.3.18\masslynx\2009.PRO\Data\20090526\_10\_qdda.raw] Score greater than 17 indicates homology Score greater than 25 indicates identity  ``` Score    Expect   Delta  Hit  Protein Peptide   4.2       6.4   -0.02   20   P02790 R.GEVPPR.Y ``` | |

|  |  |
| --- | --- |
| |  | | --- | | Top scoring peptide matches to query 2442 6: Sum of 6 scans in range 170 (rt=12.6856, f=2, i=46) to 181 (rt=13.226, f=3, i=18) [\\172.16.3.18\masslynx\2009.PRO\Data\20090530\_30\_qdda.raw] Score greater than 13 indicates homology Score greater than 25 indicates identity  ``` Score    Expect   Delta  Hit  Protein Peptide   0.1        17   -0.00   20   P02790 R.GEVPPR.Y ``` | |

|  |  |
| --- | --- |
| |  | | --- | | Top scoring peptide matches to query 2443 54: Sum of 8 scans in range 378 (rt=23.0394, f=2, i=55) to 398 (rt=24.0351, f=5, i=37) [\\172.16.3.18\masslynx\2009.PRO\Data\20090530\_18\_qdda.raw] Score greater than 22 indicates homology Score greater than 25 indicates identity  ``` Score    Expect   Delta  Hit  Protein Peptide   9.5       1.9   -0.08               R.IIPRR.F   9.5       1.9   -0.07               K.ILGVPR.S   9.5       1.9   -0.07               K.ILPGVR.I   9.5       1.9   -0.08               LLPRR   9.5       1.9   -0.07    1   P01024 K.LLPVGR.T   9.5       1.9   -0.08               LLRPR ``` | |

|  |  |
| --- | --- |
| |  | | --- | | Top scoring peptide matches to query 2445 71: Sum of 8 scans in range 428 (rt=25.5212, f=2, i=72) to 448 (rt=26.5169, f=5, i=47) [\\172.16.3.18\masslynx\2009.PRO\Data\20090529\_24\_qdda.raw] Score greater than 14 indicates homology Score greater than 25 indicates identity  ``` Score    Expect   Delta  Hit  Protein Peptide   8.6       2.3   -0.08               R.IIPRR.F   8.6       2.3   -0.06               K.ILGVPR.S   8.6       2.3   -0.06               K.ILPGVR.I   8.6       2.3   -0.08               LLPRR   8.6       2.3   -0.06    1   P01024 K.LLPVGR.T   8.6       2.3   -0.08               LLRPR   1.5        12    0.03               R.IHDNR.I   1.5        12    0.03               R.LDHNR.A ``` | |

|  |  |
| --- | --- |
| |  | | --- | | Top scoring peptide matches to query 2446 73: Sum of 4 scans in range 457 (rt=26.6788, f=2, i=124) to 469 (rt=27.2762, f=2, i=127) [\\172.16.3.18\masslynx\2009.PRO\Data\20090529\_27\_qdda.raw] Score greater than 17 indicates homology Score greater than 25 indicates identity  ``` Score    Expect   Delta  Hit  Protein Peptide   9.1       2.1   -0.05    1   P01024 K.LLPVGR.T   4.0       6.7   -0.06               R.IIPRR.F   4.0       6.7   -0.05               K.ILPGVR.I   4.0       6.7   -0.06               LLPRR ``` | |

|  |  |
| --- | --- |
| |  | | --- | | Top scoring peptide matches to query 2447 52: Sum of 4 scans in range 373 (rt=22.6848, f=3, i=37) to 391 (rt=23.5809, f=3, i=40) [\\172.16.3.18\masslynx\2009.PRO\Data\20090525\_25\_qdda.raw] Score greater than 21 indicates homology Score greater than 25 indicates identity  ``` Score    Expect   Delta  Hit  Protein Peptide   8.6       2.4   -0.06               R.IIPRR.F   8.6       2.4   -0.05               K.ILGVPR.S   8.6       2.4   -0.05               K.ILPGVR.I   8.6       2.4   -0.06               LLPRR   8.6       2.4   -0.05    1   P01024 K.LLPVGR.T   8.6       2.4   -0.06               LLRPR ``` | |

|  |  |
| --- | --- |
| |  | | --- | | Top scoring peptide matches to query 2448 62: Sum of 4 scans in range 398 (rt=24.066, f=3, i=65) to 414 (rt=24.8625, f=3, i=68) [\\172.16.3.18\masslynx\2009.PRO\Data\20090526\_13\_qdda.raw] Score greater than 23 indicates homology Score greater than 25 indicates identity  ``` Score    Expect   Delta  Hit  Protein Peptide  10.9       1.4   -0.05    1   P01024 K.LLPVGR.T   9.9       1.8   -0.06               R.IIPRR.F   9.9       1.8   -0.05               K.ILGVPR.S   9.9       1.8   -0.05               K.ILPGVR.I   9.9       1.8   -0.06               LLPRR   9.9       1.8   -0.06               LLRPR   1.3        13   -0.05               K.IVPLGR.K   1.3        13    0.02               LPPDGR   1.3        13   -0.05               R.LPVLGR.D ``` | |

|  |  |
| --- | --- |
| |  | | --- | | Top scoring peptide matches to query 2449 57: Sum of 4 scans in range 359 (rt=22.0799, f=2, i=62) to 377 (rt=22.976, f=2, i=65) [\\172.16.3.18\masslynx\2009.PRO\Data\20090528\_24\_qdda.raw] Score greater than 21 indicates homology Score greater than 25 indicates identity  ``` Score    Expect   Delta  Hit  Protein Peptide   8.7       2.3   -0.06               R.IIPRR.F   8.7       2.3   -0.05               K.ILGVPR.S   8.7       2.3   -0.05               K.ILPGVR.I   8.7       2.3   -0.06               LLPRR   8.7       2.3   -0.05    1   P01024 K.LLPVGR.T   8.7       2.3   -0.06               LLRPR ``` | |

|  |  |
| --- | --- |
| |  | | --- | | Top scoring peptide matches to query 2451 51: Sum of 4 scans in range 391 (rt=23.652, f=2, i=65) to 408 (rt=24.4982, f=2, i=68) [\\172.16.3.18\masslynx\2009.PRO\Data\20090530\_21\_qdda.raw] Score greater than 23 indicates homology Score greater than 25 indicates identity  ``` Score    Expect   Delta  Hit  Protein Peptide  11.9       1.1   -0.04    1   P01024 K.LLPVGR.T   9.8       1.8   -0.05               R.IIPRR.F   9.8       1.8   -0.04               K.ILGVPR.S   9.8       1.8   -0.04               K.ILPGVR.I   9.8       1.8   -0.05               LLPRR   9.8       1.8   -0.05               LLRPR   2.0        11   -0.04               K.IVPLGR.K   2.0        11    0.04               LPPDGR   2.0        11   -0.04               R.LPVLGR.D ``` | |

|  |  |
| --- | --- |
| |  | | --- | | Top scoring peptide matches to query 2453 80: Sum of 44 scans in range 847 (rt=46.5385, f=3, i=152) to 910 (rt=49.6614, f=4, i=127) [\\172.16.3.18\masslynx\2009.PRO\Data\20090531\_05\_qdda.raw] Score greater than 13 indicates homology Score greater than 25 indicates identity  ``` Score    Expect   Delta  Hit  Protein Peptide   7.7       2.9   -0.05               R.IIPRR.F   7.7       2.9   -0.04               K.ILGVPR.S   7.7       2.9   -0.04               K.ILPGVR.I   7.7       2.9   -0.05               LLPRR   7.7       2.9   -0.04    1   P01024 K.LLPVGR.T   7.7       2.9   -0.05               LLRPR   0.5        15    0.06               K.THPSGR.D ``` | |

|  |  |
| --- | --- |
| |  | | --- | | Top scoring peptide matches to query 2454 57: Sum of 4 scans in range 379 (rt=23.0692, f=2, i=64) to 396 (rt=23.9155, f=2, i=67) [\\172.16.3.18\masslynx\2009.PRO\Data\20090528\_15\_qdda.raw] Score greater than 22 indicates homology Score greater than 25 indicates identity  ``` Score    Expect   Delta  Hit  Protein Peptide   9.9       1.7   -0.03    1   P01024 K.LLPVGR.T   9.6       1.9   -0.04               R.IIPRR.F   9.6       1.9   -0.03               K.ILGVPR.S   9.6       1.9   -0.03               K.ILPGVR.I   9.6       1.9   -0.04               LLPRR   9.6       1.9   -0.04               LLRPR ``` | |

|  |  |
| --- | --- |
| |  | | --- | | Top scoring peptide matches to query 2455 64: Sum of 4 scans in range 431 (rt=25.5299, f=3, i=86) to 447 (rt=26.3264, f=3, i=89) [\\172.16.3.18\masslynx\2009.PRO\Data\20090526\_10\_qdda.raw] Score greater than 20 indicates homology Score greater than 25 indicates identity  ``` Score    Expect   Delta  Hit  Protein Peptide   9.9       1.7   -0.03    1   P01024 K.LLPVGR.T   6.8       3.5   -0.04               R.IIPRR.F   6.8       3.5   -0.03               K.ILGVPR.S   6.8       3.5   -0.03               K.ILPGVR.I   6.8       3.5   -0.04               LLPRR   6.8       3.5   -0.04               LLRPR   5.4       4.9    0.07               K.HVNER.F   0.6        15    0.12               R.CSRSR.D   0.6        15    0.12               CSSRR   0.6        15    0.12               SCRSR ``` | |

|  |  |
| --- | --- |
| |  | | --- | | Top scoring peptide matches to query 2456 57: Sum of 4 scans in range 404 (rt=24.2925, f=3, i=61) to 412 (rt=24.6907, f=7, i=45) [\\172.16.3.18\masslynx\2009.PRO\Data\20090528\_12\_qdda.raw] Score greater than 22 indicates homology Score greater than 25 indicates identity  ``` Score    Expect   Delta  Hit  Protein Peptide   9.5       1.9   -0.02    1   P01024 K.LLPVGR.T   9.1       2.1   -0.03               R.IIPRR.F   9.1       2.1   -0.02               K.ILGVPR.S   9.1       2.1   -0.02               K.ILPGVR.I   9.1       2.1   -0.03               LLPRR   9.1       2.1   -0.03               LLRPR ``` | |

|  |  |
| --- | --- |
| |  | | --- | | Top scoring peptide matches to query 2457 50: Sum of 4 scans in range 365 (rt=22.4211, f=6, i=33) to 383 (rt=23.3172, f=6, i=36) [\\172.16.3.18\masslynx\2009.PRO\Data\20090528\_18\_qdda.raw] Score greater than 22 indicates homology Score greater than 25 indicates identity  ``` Score    Expect   Delta  Hit  Protein Peptide   9.4       1.9   -0.03               R.IIPRR.F   9.4       1.9   -0.02               K.ILGVPR.S   9.4       1.9   -0.02               K.ILPGVR.I   9.4       1.9   -0.03               LLPRR   9.4       1.9   -0.02    1   P01024 K.LLPVGR.T   9.4       1.9   -0.03               LLRPR ``` | |

|  |  |
| --- | --- |
| |  | | --- | | Top scoring peptide matches to query 2458 89: Sum of 4 scans in range 442 (rt=25.9193, f=2, i=112) to 454 (rt=26.5167, f=2, i=115) [\\172.16.3.18\masslynx\2009.PRO\Data\20090530\_27\_qdda.raw] Score greater than 15 indicates homology Score greater than 25 indicates identity  ``` Score    Expect   Delta  Hit  Protein Peptide   5.5       4.8   -0.02    1   P01024 K.LLPVGR.T   2.1        10   -0.03               R.IIPRR.F   2.1        10   -0.02               K.ILPGVR.I   2.1        10   -0.03               LLPRR   0.6        15   -0.02               K.ILGVPR.S   0.6        15   -0.03               LLRPR ``` | |

|  |  |
| --- | --- |
| |  | | --- | | Top scoring peptide matches to query 2459 67: Sum of 5 scans in range 420 (rt=25.0551, f=2, i=73) to 433 (rt=25.7023, f=2, i=76) [\\172.16.3.18\masslynx\2009.PRO\Data\20090530\_24\_qdda.raw] Score greater than 16 indicates homology Score greater than 25 indicates identity  ``` Score    Expect   Delta  Hit  Protein Peptide   3.3       7.9   -0.02               R.IIPRR.F   3.3       7.9   -0.01               K.ILGVPR.S   3.3       7.9   -0.01               K.ILPGVR.I   3.3       7.9   -0.02               LLPRR   3.3       7.9   -0.01    1   P01024 K.LLPVGR.T   3.3       7.9   -0.02               LLRPR ``` | |

|  |  |
| --- | --- |
| |  | | --- | | Top scoring peptide matches to query 2546 9: Sum of 4 scans in range 135 (rt=11.184, f=3, i=19) to 151 (rt=11.9805, f=3, i=22) [\\172.16.3.18\masslynx\2009.PRO\Data\20090522\_21\_qdda.raw] Score greater than 15 indicates homology Score greater than 28 indicates identity  ``` Score    Expect   Delta  Hit  Protein Peptide   2.6        17   -0.15               K.NPIYR.S   2.4        18   -0.09    1   P01024 ENPMR ``` | |

|  |  |
| --- | --- |
| |  | | --- | | Top scoring peptide matches to query 2547 59: Sum of 4 scans in range 386 (rt=23.489, f=4, i=38) to 404 (rt=24.3851, f=4, i=41) [\\172.16.3.18\masslynx\2009.PRO\Data\20090522\_37\_qdda.raw] Score greater than 16 indicates homology Score greater than 29 indicates identity  ``` Score    Expect   Delta  Hit  Protein Peptide   4.8        15    0.02               K.LMENR.K   4.8        15   -0.03               R.LMRSR.T   2.7        24    0.02               K.FPDQR.Q   2.7        24    0.02               K.MLDQR.I   1.7        31    0.07               R.DEDQR.S   1.7        31    0.07               R.EDDQR.R   0.1        44    0.03               R.LCPQR.G   0.1        44    0.02               R.LDMQR.G   0.1        44   -0.02               K.LMVQR.T   0.0        45   -0.05   67   P06396 LFQVR ``` | |

|  |  |
| --- | --- |
| |  | | --- | | Top scoring peptide matches to query 2570 48: Sum of 4 scans in range 372 (rt=22.712, f=5, i=33) to 388 (rt=23.5085, f=5, i=36) [\\172.16.3.18\masslynx\2009.PRO\Data\20090530\_15\_qdda.raw] Score greater than 27 indicates homology Score greater than 28 indicates identity  ``` Score    Expect   Delta  Hit  Protein Peptide  27.5      0.06   -0.09               R.VIDAVR.F  27.5      0.06   -0.09   29   P02766 K.VLDAVR.G  13.2       1.6   -0.13               K.VIVSVR.V  11.0       2.6   -0.07               K.VNNGIR.D  10.9       2.7   -0.13               R.VLATLR.G  10.2       3.1   -0.02               R.DPDVAR.E   8.3       4.9   -0.10               K.VIERR.I   8.3       4.9   -0.10               R.VIRER.V   8.3       4.9   -0.10               K.VLERR.A   8.3       4.9   -0.09               R.VLGVER.A ``` | |

|  |  |
| --- | --- |
| |  | | --- | | Top scoring peptide matches to query 2571 65: Sum of 5 scans in range 393 (rt=23.8212, f=7, i=42) to 412 (rt=24.7598, f=7, i=46) [\\172.16.3.18\masslynx\2009.PRO\Data\20090526\_16\_qdda.raw] Score greater than 14 indicates homology Score greater than 28 indicates identity  ``` Score    Expect   Delta  Hit  Protein Peptide   7.6       5.8   -0.08               R.VIDAVR.F   7.6       5.8   -0.08   29   P02766 K.VLDAVR.G   0.8        28   -0.05               K.VNNGIR.D ``` | |

|  |  |
| --- | --- |
| |  | | --- | | Top scoring peptide matches to query 2572 57: Sum of 4 scans in range 369 (rt=22.6189, f=4, i=37) to 387 (rt=23.5151, f=4, i=40) [\\172.16.3.18\masslynx\2009.PRO\Data\20090525\_16\_qdda.raw] Score greater than 28 indicates identity  ``` Score    Expect   Delta  Hit  Protein Peptide  28.1     0.052   -0.07               R.VIDAVR.F  28.1     0.052   -0.07   29   P02766 K.VLDAVR.G  13.8       1.4   -0.10               K.VIVSVR.V  11.5       2.3   -0.04               K.VNNGIR.D  11.4       2.4   -0.10               R.VLATLR.G  10.9       2.7    0.01               R.DPDVAR.E   8.8       4.3   -0.08               K.VIERR.I   8.8       4.3   -0.08               R.VIRER.V   8.8       4.3   -0.08               K.VLERR.A   8.8       4.3   -0.07               R.VLGVER.A ``` | |

|  |  |
| --- | --- |
| |  | | --- | | Top scoring peptide matches to query 2577 76: Sum of 22 scans in range 810 (rt=44.7027, f=3, i=144) to 912 (rt=49.7538, f=6, i=110) [\\172.16.3.18\masslynx\2009.PRO\Data\20090531\_05\_qdda.raw] Score greater than 22 indicates homology Score greater than 28 indicates identity  ``` Score    Expect   Delta  Hit  Protein Peptide  17.8      0.55   -0.03               R.VIDAVR.F  17.8      0.55   -0.03   29   P02766 K.VLDAVR.G   8.6       4.6   -0.01               K.VNNGIR.D   8.0       5.2    0.04               R.DPDVAR.E   8.0       5.3   -0.02               K.MVPAVR.E   5.4       9.6   -0.07               K.VIVSVR.V   5.1        10   -0.07               R.VLATLR.G   3.0        17   -0.05               R.VIRER.V   3.0        17   -0.03               R.VLGVER.A   3.0        17   -0.05               VLRER ``` | |

|  |  |
| --- | --- |
| |  | | --- | | Top scoring peptide matches to query 2578 74: Sum of 4 scans in range 413 (rt=24.8414, f=4, i=47) to 430 (rt=25.6877, f=4, i=50) [\\172.16.3.18\masslynx\2009.PRO\Data\20090525\_13\_qdda.raw] Score greater than 18 indicates homology Score greater than 28 indicates identity  ``` Score    Expect   Delta  Hit  Protein Peptide  10.8       2.8   -0.02               R.VIDAVR.F  10.8       2.8   -0.02   29   P02766 K.VLDAVR.G   4.5        12    0.00               K.VNNGIR.D   2.5        19   -0.06               K.VIVSVR.V   0.1        33    0.00               K.QAAGGLR.A ``` | |

|  |  |
| --- | --- |
| |  | | --- | | Top scoring peptide matches to query 2579 76: Sum of 4 scans in range 395 (rt=23.9013, f=2, i=74) to 413 (rt=24.7973, f=2, i=77) [\\172.16.3.18\masslynx\2009.PRO\Data\20090522\_09\_qdda.raw] Score greater than 27 indicates homology Score greater than 28 indicates identity  ``` Score    Expect   Delta  Hit  Protein Peptide  21.5      0.24   -0.02               R.VIDAVR.F  21.5      0.24   -0.02   29   P02766 K.VLDAVR.G  13.8       1.4    0.00               K.VNNGIR.D   6.3       7.7   -0.01               K.MVPAVR.E   6.3       7.9   -0.06               R.VLATLR.G   5.7         9   -0.06               K.VIVSVR.V   4.8        11   -0.02               K.VEAVVR.T   4.8        11   -0.04               R.VWLVR.V   4.7        11    0.05               R.DPDVAR.E   3.4        15   -0.06               R.VALTLR.V ``` | |

|  |  |
| --- | --- |
| |  | | --- | | Top scoring peptide matches to query 2580 84: Sum of 4 scans in range 435 (rt=25.9168, f=3, i=62) to 453 (rt=26.8129, f=3, i=65) [\\172.16.3.18\masslynx\2009.PRO\Data\20090525\_10\_qdda.raw] Score greater than 28 indicates identity  ``` Score    Expect   Delta  Hit  Protein Peptide  23.8      0.14   -0.02               R.VIDAVR.F  23.8      0.14   -0.02   29   P02766 K.VLDAVR.G  14.2       1.3    0.01               K.VNNGIR.D   9.8       3.5   -0.05               K.VIVSVR.V   8.2       5.1   -0.05               R.VLATLR.G   6.8         7    0.00               K.MVPAVR.E   6.6       7.2    0.06               R.DPDVAR.E   5.2        10   -0.03               K.VIERR.I   5.2        10   -0.03               R.VIRER.V   5.2        10   -0.03               K.VLERR.A ``` | |

|  |  |
| --- | --- |
| |  | | --- | | Top scoring peptide matches to query 2581 71: Sum of 4 scans in range 455 (rt=26.8368, f=3, i=71) to 473 (rt=27.7329, f=3, i=74) [\\172.16.3.18\masslynx\2009.PRO\Data\20090525\_\_04\_qdda.raw] Score greater than 20 indicates homology Score greater than 28 indicates identity  ``` Score    Expect   Delta  Hit  Protein Peptide  17.1      0.64   -0.01               R.VIDAVR.F  17.1      0.64   -0.01   29   P02766 K.VLDAVR.G   6.4       7.6   -0.05               K.VIVSVR.V   2.6        18   -0.05               R.VLATLR.G   2.1        21   -0.03               R.VIRER.V   2.1        21   -0.03               VLRER   1.9        21    0.01               K.VNNGIR.D   1.6        23    0.01               K.AQQVAR.R   1.5        24   -0.01               R.VLGVER.A   0.8        27    0.06               R.DPDVAR.E ``` | |

|  |  |
| --- | --- |
| |  | | --- | | Top scoring peptide matches to query 2724 55: Sum of 5 scans in range 327 (rt=20.6979, f=7, i=36) to 346 (rt=21.6365, f=7, i=40) [\\172.16.3.18\masslynx\2009.PRO\Data\20090522\_33\_qdda.raw] Score greater than 18 indicates homology Score greater than 35 indicates identity  ``` Score    Expect   Delta  Hit  Protein Peptide   6.3        43   -0.09   12   P0C0L4 K.GSVFLR.N   5.0        59    0.02               EMNER   4.3        68    0.02               K.EMDQR.D   4.3        68    0.02               K.EMENR.R   4.3        68   -0.02               R.EMGVSR.S   3.3        86   -0.05               K.ENFIR.F   3.3        86   -0.05               R.ENFLR.D   3.3        86   -0.02               R.ENMLR.Q   3.1        90   -0.06               EARFR   3.1        90   -0.03               K.EARMR.L ``` | |

|  |  |
| --- | --- |
| |  | | --- | | Top scoring peptide matches to query 2725 54: Sum of 8 scans in range 338 (rt=21.0698, f=2, i=59) to 357 (rt=22.0158, f=3, i=47) [\\172.16.3.18\masslynx\2009.PRO\Data\20090529\_12\_qdda.raw] Score greater than 19 indicates homology Score greater than 35 indicates identity  ``` Score    Expect   Delta  Hit  Protein Peptide  11.3        14    0.03               EEMNR  11.3        14    0.03               R.EENMR.E   5.9        48   -0.08   12   P0C0L4 K.GSVFLR.N   5.2        56   -0.04               R.DFQIR.V   5.2        56   -0.04               DFQLR   5.2        56   -0.01               R.DMQLR.V   4.5        66    0.03               K.EMDQR.D   4.5        66    0.03               K.EMENR.R   4.5        66   -0.01               R.EMGVSR.S   4.5        66    0.03               EMNER ``` | |

|  |  |
| --- | --- |
| |  | | --- | | Top scoring peptide matches to query 2729 45: Sum of 8 scans in range 346 (rt=21.3517, f=2, i=66) to 365 (rt=22.2975, f=3, i=43) [\\172.16.3.18\masslynx\2009.PRO\Data\20090530\_12\_qdda.raw] Score greater than 22 indicates homology Score greater than 35 indicates identity  ``` Score    Expect   Delta  Hit  Protein Peptide  11.7        13   -0.06   12   P0C0L4 K.GSVFLR.N   8.4        27    0.04               EEMNR   8.4        27    0.04               R.EENMR.E   6.6        41    0.01               K.GGMEIR.E   4.1        71   -0.03               K.ENFIR.F   4.1        71   -0.03               R.ENFLR.D   4.1        71    0.01               R.ENMLR.Q   4.1        72   -0.03               DQFLR   3.4        84   -0.03               NEFLR   3.4        84    0.01               K.NEMLR.V ``` | |

|  |  |
| --- | --- |
[truncated: 2,581,946 more chars]
