# Supplementary material for: Relative Quantification of Several Plasma Proteins during Liver Transplantation Surgery
Source: Hindawi journal article supplement (doi:10.1155/2011/248613), 2011-01-01
Supplement: f1 [file 248613.f1.zip › AddFile2_P1re-P3.htm]

Select Summary Report (AddFile2\_Patient1\_repeat-Patient3)


# Mascot Search Results

```
Database               : SwissProt 57.7 (497293 sequences; 175274722 residues)
Taxonomy               : Homo sapiens (human) (20405 sequences)
Enzyme                 : Trypsin
Fixed modifications    : Methylthio (C),iTRAQ8plex (N-term),iTRAQ8plex (K)
Variable modifications : Oxidation (M)
Mass values            : Monoisotopic
Protein Mass           : Unrestricted
Peptide Mass Tolerance : ± 0.2 Da
Fragment Mass Tolerance: ± 0.1 Da
Max Missed Cleavages   : 2
Instrument type        : ESI-QUAD-TOF
Number of queries      : 15667

|  |  |  |  |  |  |  |  |  |
| --- | --- | --- | --- | --- | --- | --- | --- | --- |
| Protein hits           : | Patient1-Art/Control | Patient1-Porta/Control | Patient1-Hepa/Control | Patient3-Art/Control | Patient3-Porta/Control | Patient3-Hepa/Control |  |  |
|  | 0.903 | 0.929 | 1.089 | 1.235 | 1.173 | 1.409 | P01023 | Alpha-2-macroglobulin OS=Homo sapiens GN=A2M PE=1 SV=1 |
|  | 1.012 | 0.986 | 1.024 | 0.966 | 0.909 | 0.880 | P01024 | Complement C3 OS=Homo sapiens GN=C3 PE=1 SV=2 |
|  | 0.684 | 0.601 | 0.694 | 0.801 | 0.707 | 0.764 | P02652 | Apolipoprotein A-II OS=Homo sapiens GN=APOA2 PE=1 SV=1 |
|  | 1.257 | 1.268 | 1.171 | 1.208 | 1.178 | 1.141 | P04114 | Apolipoprotein B-100 OS=Homo sapiens GN=APOB PE=1 SV=1 |
|  | 1.064 | 1.022 | 0.940 | 0.733 | 0.846 | 0.844 | P02647 | Apolipoprotein A-I OS=Homo sapiens GN=APOA1 PE=1 SV=1 |
|  | 0.997 | 1.022 | 0.806 | 0.867 | 0.879 | 0.722 | P02671 | Fibrinogen alpha chain OS=Homo sapiens GN=FGA PE=1 SV=2 |
|  | 1.093 | 1.080 | 1.175 | 0.796 | 0.696 | 0.715 | P01011 | Alpha-1-antichymotrypsin OS=Homo sapiens GN=SERPINA3 PE=1 SV=2 |
|  | 1.140 | 1.164 | 1.153 | 1.092 | 0.998 | 0.943 | P00450 | Ceruloplasmin OS=Homo sapiens GN=CP PE=1 SV=1 |
|  | 0.945 | 0.954 | 0.982 | 0.864 | 0.892 | 0.831 | P02675 | Fibrinogen beta chain OS=Homo sapiens GN=FGB PE=1 SV=2 |
|  | 1.011 | 1.008 | 0.893 | 0.822 | 0.917 | 0.833 | P02679 | Fibrinogen gamma chain OS=Homo sapiens GN=FGG PE=1 SV=3 |
|  | 1.400 | 1.394 | 1.362 | 0.749 | 0.776 | 0.856 | P01871 | Ig mu chain C region OS=Homo sapiens GN=IGHM PE=1 SV=3 |
|  | 0.992 | 0.949 | 0.906 | 0.896 | 1.021 | 0.914 | P08603 | Complement factor H OS=Homo sapiens GN=CFH PE=1 SV=4 |
|  | 1.095 | 1.116 | 1.297 | 1.330 | 1.324 | 1.127 | P04217 | Alpha-1B-glycoprotein OS=Homo sapiens GN=A1BG PE=1 SV=3 |
|  | 0.996 | 1.123 | 0.988 | 1.023 | 1.136 | 0.854 | P05155 | Plasma protease C1 inhibitor OS=Homo sapiens GN=SERPING1 PE=1 SV=2 |
|  | 1.072 | 1.001 | 1.221 | 1.231 | 1.227 | 1.080 | P02766 | Transthyretin OS=Homo sapiens GN=TTR PE=1 SV=1 |
|  | 1.091 | 0.997 | 1.053 | 0.992 | 1.115 | 0.996 | P02790 | Hemopexin OS=Homo sapiens GN=HPX PE=1 SV=2 |
|  | 0.896 | 0.886 | 0.825 | 1.132 | 1.320 | 1.060 | P02774 | Vitamin D-binding protein OS=Homo sapiens GN=GC PE=1 SV=1 |
|  | 1.336 | 1.347 | 1.322 | 1.009 | 0.870 | 0.941 | P06727 | Apolipoprotein A-IV OS=Homo sapiens GN=APOA4 PE=1 SV=3 |
|  | 0.986 | 1.087 | 1.126 | 1.180 | 1.326 | 1.150 | P00751 | Complement factor B OS=Homo sapiens GN=CFB PE=1 SV=2 |
|  | 1.174 | 0.820 | 1.246 | 1.282 | 1.343 | 1.311 | P08697 | Alpha-2-antiplasmin OS=Homo sapiens GN=SERPINF2 PE=1 SV=3 |
|  | 1.015 | 1.024 | 0.840 | 1.363 | 1.419 | 1.066 | P04196 | Histidine-rich glycoprotein OS=Homo sapiens GN=HRG PE=1 SV=1 |
|  | 1.399 | 1.491 | 1.335 | 0.862 | 0.728 | 0.676 | P01834 | Ig kappa chain C region OS=Homo sapiens GN=IGKC PE=1 SV=1 |
|  | 0.846 | 0.947 | 0.993 | 1.247 | 1.522 | 1.227 | P02765 | Alpha-2-HS-glycoprotein OS=Homo sapiens GN=AHSG PE=1 SV=1 |
|  | 1.007 | 1.080 | 0.797 | 1.009 | 0.989 | 1.051 | P01042 | Kininogen-1 OS=Homo sapiens GN=KNG1 PE=1 SV=2 |
|  | 1.160 | 1.292 | 1.131 | 0.762 | 0.760 | 0.818 | P02763 | Alpha-1-acid glycoprotein 1 OS=Homo sapiens GN=ORM1 PE=1 SV=1 |
|  | 0.995 | 1.053 | 1.151 | 1.284 | 1.172 | 1.101 | P00734 | Prothrombin OS=Homo sapiens GN=F2 PE=1 SV=2 |
|  | 0.754 | 0.989 | 1.061 | 1.207 | 1.428 | 1.455 | P01019 | Angiotensinogen OS=Homo sapiens GN=AGT PE=1 SV=1 |
|  | --- | 0.847 | 0.825 | 1.411 | 1.340 | 1.554 | P0C0L4 | Complement C4-A OS=Homo sapiens GN=C4A PE=1 SV=1 |
|  | 1.069 | 0.891 | 1.116 | 1.447 | 1.177 | 1.036 | P01008 | Antithrombin-III OS=Homo sapiens GN=SERPINC1 PE=1 SV=1 |
|  | 0.927 | 1.102 | 1.302 | 1.193 | 1.467 | 1.535 | P27169 | Serum paraoxonase/arylesterase 1 OS=Homo sapiens GN=PON1 PE=1 SV=2 |
|  | --- | --- | --- | --- | --- | --- | P02656 | Apolipoprotein C-III OS=Homo sapiens GN=APOC3 PE=1 SV=1 |
|  | 1.236 | 1.239 | 1.188 | 1.595 | 1.543 | 1.366 | P10909 | Clusterin OS=Homo sapiens GN=CLU PE=1 SV=1 |
|  | 0.932 | 1.001 | 0.796 | 0.282 | --- | 1.349 | P19823 | Inter-alpha-trypsin inhibitor heavy chain H2 OS=Homo sapiens GN=ITIH2 PE=1 SV=2 |
|  | 1.050 | 0.993 | 0.803 | 1.313 | 1.543 | 1.359 | P02649 | Apolipoprotein E OS=Homo sapiens GN=APOE PE=1 SV=1 |
|  | 0.768 | 0.817 | 1.064 | 1.110 | 0.761 | 1.456 | Q14624 | Inter-alpha-trypsin inhibitor heavy chain H4 OS=Homo sapiens GN=ITIH4 PE=1 SV=4 |
|  | --- | --- | --- | --- | --- | --- | P04264 | Keratin, type II cytoskeletal 1 OS=Homo sapiens GN=KRT1 PE=1 SV=6 |
|  | 0.859 | 1.125 | 1.508 | 0.870 | 1.006 | 1.205 | P05156 | Complement factor I OS=Homo sapiens GN=CFI PE=1 SV=1 |
|  | 0.773 | 0.984 | 0.754 | 1.220 | 1.267 | 1.007 | P02749 | Beta-2-glycoprotein 1 OS=Homo sapiens GN=APOH PE=1 SV=3 |
|  | --- | --- | --- | --- | --- | --- | P10643 | Complement component C7 OS=Homo sapiens GN=C7 PE=1 SV=2 |
|  | --- | --- | --- | --- | --- | --- | P02760 | Protein AMBP OS=Homo sapiens GN=AMBP PE=1 SV=1 |
|  | --- | --- | --- | --- | --- | --- | P25311 | Zinc-alpha-2-glycoprotein OS=Homo sapiens GN=AZGP1 PE=1 SV=1 |
|  | --- | --- | --- | --- | --- | --- | P02751 | Fibronectin OS=Homo sapiens GN=FN1 PE=1 SV=3 |
|  | --- | --- | --- | --- | --- | --- | P51884 | Lumican OS=Homo sapiens GN=LUM PE=1 SV=2 |
|  | --- | --- | --- | --- | --- | --- | P02655 | Apolipoprotein C-II OS=Homo sapiens GN=APOC2 PE=1 SV=1 |
|  | --- | --- | --- | --- | --- | --- | P04003 | C4b-binding protein alpha chain OS=Homo sapiens GN=C4BPA PE=1 SV=2 |
|  | --- | --- | --- | --- | --- | --- | P02747 | Complement C1q subcomponent subunit C OS=Homo sapiens GN=C1QC PE=1 SV=3 |
|  | 0.900 | 1.109 | 0.975 | 0.890 | 0.837 | 0.812 | A6NMB1 | Sialic acid-binding Ig-like lectin 16 OS=Homo sapiens GN=SIGLECP16 PE=2 SV=3 |
|  | --- | --- | --- | --- | --- | --- | P00915 | Carbonic anhydrase 1 OS=Homo sapiens GN=CA1 PE=1 SV=2 |
|  | 0.647 | 0.730 | 0.876 | 0.619 | 0.626 | 0.667 | Q2KHM9 | Uncharacterized protein KIAA0753 OS=Homo sapiens GN=KIAA0753 PE=2 SV=2 |
|  | --- | --- | --- | --- | --- | --- | A6NMZ7 | Collagen alpha-6(VI) chain OS=Homo sapiens GN=COL6A6 PE=1 SV=2 |
|  | --- | --- | --- | --- | --- | --- | P00747 | Plasminogen OS=Homo sapiens GN=PLG PE=1 SV=2 |
|  | --- | --- | --- | --- | --- | --- | P01842 | Ig lambda chain C regions OS=Homo sapiens GN=IGLC1 PE=1 SV=1 |
|  | --- | --- | --- | --- | --- | --- | P02452 | Collagen alpha-1(I) chain OS=Homo sapiens GN=COL1A1 PE=1 SV=4 |
|  | --- | --- | --- | --- | --- | --- | Q86XS8 | Goliath homolog OS=Homo sapiens GN=RNF130 PE=1 SV=1 |
|  | --- | --- | --- | --- | --- | --- | P13671 | Complement component C6 OS=Homo sapiens GN=C6 PE=1 SV=3 |
```

|  | SwissProt | Decoy | False discovery rate |
| --- | --- | --- | --- |
| Peptide matches above identity threshold | 1273 | 12 | 0.94 % |
| Peptide matches above homology or identity threshold | 1778 | 31 | 1.74 % |

### Select Summary Report

|  |  |  |  |
| --- | --- | --- | --- |
|  | Peptide Summary Select Summary (protein hits) Select Summary (unassigned) Export Search Results |  | Help |
|  | Significance threshold p< | Max. number of hits |  |
|  | Standard scoring  MudPIT scoring | Ions score or expect cut-off | Show sub-sets |
|  | Show pop-ups  Suppress pop-ups | Sort unassigned  Decreasing Score Increasing query / Mr Decreasing Intensity | Require bold red |
|  | Protein ratio type  Average Median Weighted | Normalisation  None Average ratio Median ratio Summed intensities | Help |
|  | Report peptide ratios | Outlier removal  None Automatic Dixon's method Grubbs' method Rosner's method | Min. # peptides |
|  | Min. precursor charge | Peptide threshold  Minimum score of Maximum expect of At least identity At least homology |  |


|  |  |
| --- | --- |
| **1.** | P01023    **Mass:** 191703   **Score:** 9705   **Queries matched:** 899   **emPAI:** 2.71 |
|  | Alpha-2-macroglobulin OS=Homo sapiens GN=A2M PE=1 SV=1 |

|  |  |  |  |  |  |
| --- | --- | --- | --- | --- | --- |
|  | **Quantitation:** | **Ratio** | **Weighted** | **N** | **SD(geo)** |
|  |  | Patient1-Art/Control | 0.903 | 263 | NN |
|  |  | Patient1-Porta/Control | 0.929 | 271 | NN |
|  |  | Patient1-Hepa/Control | 1.089 | 270 | NN |
|  |  | Patient3-Art/Control | 1.235 | 281 | NN |
|  |  | Patient3-Porta/Control | 1.173 | 281 | NN |
|  |  | Patient3-Hepa/Control | 1.409 | 280 | NN |

|  |  |  |  |  |  |  |  |  |  |  |  |  |  |  |  |  |
| --- | --- | --- | --- | --- | --- | --- | --- | --- | --- | --- | --- | --- | --- | --- | --- | --- |
|  | **Query** | **Observed** | **Mr(expt)** | **Mr(calc)** | **Delta** | **Miss** | **Score** | **Expect** | **Rank** | **Patient1-Art/Control** | **Patient1-Porta/Control** | **Patient1-Hepa/Control** | **Patient3-Art/Control** | **Patient3-Porta/Control** | **Patient3-Hepa/Control** | **Peptide** |
|  | 645 | **476.26** | **950.50** | **950.62** | **-0.13** | **0** | **23** | **0.19** | **1** | **---** | **---** | **---** | **---** | **---** | **---** | **K.VIFIR.G** 635 636 640 644 647 649 650 651 652 653 655 657 659 661 662 664 665 |
|  | 1001 | **499.26** | **996.50** | **996.57** | **-0.07** | **0** | **26** | **0.36** | **1** | **---** | **---** | **---** | **---** | **---** | **---** | **K.TFAQAR.A** 1000 1002 1004 1005 |
|  | 1432 | **532.73** | **1063.45** | **1063.57** | **-0.12** | **0** | **31** | **0.022** | **1** | **1.048** | **1.057** | **1.014** | **1.144** | **1.194** | **1.631** | **K.VDSHFR.Q** |
|  | 1730 | **562.76** | **1123.51** | **1123.61** | **-0.10** | **0** | **15** | **0.98** | **1** | **---** | **---** | **---** | **---** | **---** | **---** | **R.QSSEITR.T** |
|  | 1793 | **566.81** | **1131.61** | **1131.66** | **-0.04** | **0** | **39** | **0.0074** | **1** | **1.299** | **0.850** | **1.700** | **0.832** | **0.970** | **1.074** | **K.SDIAPVAR.L** 1787 1788 1789 1790 1791 1792 |
|  | 1845 | **570.27** | **1138.52** | **1138.72** | **-0.19** | **0** | **15** | **1.7** | **1** | **---** | **---** | **---** | **---** | **---** | **---** | **R.LVDGK.G** 1847 1848 1849 1850 1851 1854 1856 1857 1860 1862 |
|  | 2166 | **590.89** | **1179.76** | **1179.78** | **-0.02** | **0** | **19** | **1** | **1** | **---** | **---** | **---** | **---** | **---** | **---** | **K.VVVQK.K** 2147 2148 2149 2150 2151 2152 2153 2154 2155 2156 2157 2158 2159 2160 2161 2162 2163 2164 2168 2169 2170 |
|  | 2246 | **595.79** | **1189.56** | **1189.64** | **-0.08** | **0** | **(13)** | **1.9** | **1** | **---** | **---** | **---** | **---** | **---** | **---** | **K.YGAATFTR.T** 2244 2248 2251 2253 |
|  | 2369 | **601.34** | **1200.66** | **1200.77** | **-0.11** | **0** | **16** | **1.3** | **1** | **---** | **---** | **---** | **---** | **---** | **---** | **K.LSFVK.V** 2359 2360 2361 2362 2363 2367 2371 2375 2377 |
|  | 2612 | **621.87** | **1241.73** | **1241.80** | **-0.07** | **0** | **25** | **0.21** | **1** | **---** | **---** | **---** | **---** | **---** | **---** | **K.VFQLK.R** 2609 2611 2613 2617 |
|  | 2734 | **637.34** | **1272.66** | **1272.77** | **-0.10** | **0** | **5** | **15** | **1** | **---** | **---** | **---** | **---** | **---** | **---** | **R.QLNYK.H** |
|  | 2752 | **638.35** | **1274.68** | **1274.74** | **-0.07** | **0** | **13** | **2.4** | **1** | **---** | **---** | **---** | **---** | **---** | **---** | **K.AFTNSK.I** 2744 2747 2748 2750 2751 |
|  | 2913 | **651.86** | **1301.70** | **1301.78** | **-0.08** | **0** | **12** | **5.5** | **1** | **---** | **---** | **---** | **---** | **---** | **---** | **R.TTVMVK.N** |
|  | 2965 | **655.80** | **1309.59** | **1309.67** | **-0.07** | **0** | **27** | **0.084** | **1** | **---** | **---** | **---** | **---** | **---** | **---** | **K.FQVDNNNR.L** 2966 |
|  | 3093 | **666.86** | **1331.71** | **1331.84** | **-0.13** | **0** | **32** | **0.035** | **1** | **0.427** | **1.144** | **1.568** | **0.745** | **0.896** | **1.400** | **K.GVPIPNK.V** 3091 3092 3094 3097 3098 3101 |
|  | 3317 | **687.36** | **1372.70** | **1372.82** | **-0.12** | **0** | **36** | **0.021** | **1** | **0.473** | **0.867** | **1.070** | **1.191** | **0.964** | **1.458** | **R.GEAFTLK.A** 3315 3316 3318 3319 3321 3325 |
|  | 3538 | **707.85** | **1413.68** | **1413.81** | **-0.13** | **0** | **22** | **0.32** | **1** | **---** | **---** | **---** | **---** | **---** | **---** | **K.GPTQEFK.K** 3530 3541 3543 |
|  | 3763 | **726.85** | **1451.69** | **1451.82** | **-0.13** | **0** | **28** | **0.072** | **1** | **---** | **---** | **---** | **---** | **---** | **---** | **R.QGIPFFGQVR.L** |
|  | 3939 | **498.90** | **1493.68** | **1493.85** | **-0.16** | **0** | **21** | **0.32** | **1** | **---** | **---** | **---** | **---** | **---** | **---** | **K.YGAATFTR.T** |
|  | 3969 | **749.37** | **1496.73** | **1496.87** | **-0.14** | **0** | **37** | **0.012** | **1** | **0.974** | **0.869** | **0.904** | **1.333** | **1.000** | **1.554** | **K.SLNEEAVK.K** 3970 3972 3973 3978 3982 |
|  | 4066 | **757.84** | **1513.66** | **1513.84** | **-0.18** | **0** | **67** | **5.5e-006** | **1** | **1.627** | **1.226** | **1.299** | **2.125** | **1.493** | **1.743** | **K.LPPNVVEESAR.A** 4065 4067 4068 4069 4070 4071 4072 4073 4074 |
|  | 4158 | **510.30** | **1527.88** | **1528.01** | **-0.13** | **1** | **10** | **6.8** | **1** | **---** | **---** | **---** | **---** | **---** | **---** | **R.KEVLK.S** 4155 4156 4157 |
|  | 4181 | **511.93** | **1532.77** | **1532.95** | **-0.18** | **0** | **30** | **0.057** | **1** | **---** | **---** | **---** | **---** | **---** | **---** | **R.TGTHGLLVK.Q** 4179 4180 4183 |
|  | 4260 | **780.38** | **1558.74** | **1558.84** | **-0.10** | **0** | **47** | **0.0012** | **1** | **1.236** | **1.118** | **1.299** | **1.664** | **2.013** | **1.732** | **K.AIGYLNTGYQR.Q** 4252 4255 4256 4259 4261 4263 4265 4266 |
|  | 4314 | **783.34** | **1564.66** | **1564.84** | **-0.17** | **0** | **51** | **0.00017** | **1** | **1.379** | **1.115** | **2.747** | **2.343** | **0.957** | **1.973** | **R.VTAAPQSVCALR.A** 4313 4315 4316 4317 4318 4319 4321 4322 |
|  | 4368 | **790.31** | **1578.61** | **1578.77** | **-0.16** | **0** | **40** | **0.00074** | **1** | **0.370** | **1.180** | **0.696** | **1.052** | **0.769** | **0.792** | **R.VGFYESDVMGR.G** 4369 4371 4372 4373 4376 |
|  | 4516 | **813.95** | **1625.88** | **1626.00** | **-0.11** | **0** | **41** | **0.0047** | **1** | **1.751** | **1.337** | **2.201** | **2.143** | **2.075** | **3.104** | **K.ATVLNYLPK.C** 4518 4519 |
|  | 4679 | **827.93** | **1653.85** | **1653.99** | **-0.14** | **0** | **37** | **0.014** | **1** | **1.123** | **1.064** | **1.502** | **0.736** | **0.993** | **1.016** | **K.FEVQVTVPK.I** 4680 |
|  | 4850 | **564.99** | **1691.95** | **1692.02** | **-0.06** | **0** | **16** | **1.8** | **1** | **---** | **---** | **---** | **---** | **---** | **---** | **K.GHFSISIPVK.S** 4848 4853 4854 |
|  | 5024 | **571.30** | **1710.89** | **1711.01** | **-0.12** | **0** | **58** | **9.1e-005** | **1** | **0.736** | **0.734** | **0.490** | **1.013** | **0.842** | **1.074** | **R.SSGSLLNNAIK.G** 5022 5025 5026 |
|  | 5055 | **575.67** | **1723.99** | **1724.01** | **-0.02** | **0** | **17** | **1.2** | **1** | **---** | **---** | **---** | **---** | **---** | **---** | **R.QTVSWAVTPK.S** 5052 5053 5054 |
|  | 5263 | **586.97** | **1757.90** | **1757.98** | **-0.08** | **0** | **48** | **0.00099** | **1** | **0.702** | **0.814** | **1.147** | **0.938** | **1.037** | **1.669** | **R.SASNMAIVDVK.M** 5256 5259 5260 |
|  | 5514 | **599.36** | **1795.05** | **1795.17** | **-0.12** | **0** | **8** | **8.3** | **1** | **---** | **---** | **---** | **---** | **---** | **---** | **R.DLKPAIVK.V** 5509 5511 5513 5515 5516 |
|  | 5680 | **911.88** | **1821.75** | **1821.92** | **-0.17** | **0** | **57** | **2.5e-005** | **1** | **0.962** | **0.811** | **0.897** | **1.154** | **1.400** | **1.674** | **K.YDVENCLANK.V** 5679 5681 5683 5684 5685 |
|  | 5846 | **617.30** | **1848.86** | **1849.00** | **-0.14** | **0** | **57** | **7.8e-005** | **1** | **1.169** | **0.461** | **1.020** | **0.831** | **1.025** | **1.587** | **R.LVHVEEPHTETVR.K** 5841 5842 5845 5849 5850 |
|  | 5930 | **621.96** | **1862.86** | **1863.05** | **-0.18** | **0** | **(23)** | **0.21** | **1** | **---** | **---** | **---** | **---** | **---** | **---** | **K.AIGYLNTGYQR.Q** 5939 |
|  | 5936 | **621.99** | **1862.94** | **1863.05** | **-0.10** | **0** | **(17)** | **1.4** | **1** | **---** | **---** | **---** | **---** | **---** | **---** | **K.AIGYLNTGYQR.Q** 5931 5932 5934 5935 5937 |
|  | 5997 | **625.00** | **1871.98** | **1872.07** | **-0.09** | **0** | **44** | **0.003** | **1** | **0.264** | **0.591** | **0.967** | **0.531** | **0.653** | **1.692** | **K.LSFYYLIMAK.G** 5994 5996 6001 6003 |
|  | 6344 | **645.96** | **1934.85** | **1935.02** | **-0.18** | **0** | **52** | **0.00017** | **1** | **0.884** | **0.927** | **0.853** | **1.206** | **1.219** | **1.367** | **R.NALFCLESAWK.T** 6347 6348 6349 |
|  | 6502 | **654.39** | **1960.15** | **1960.24** | **-0.09** | **1** | **12** | **4.2** | **1** | **---** | **---** | **---** | **---** | **---** | **---** | **K.GVPIPNKVIFIR.G** |
|  | 6730 | **668.33** | **2001.98** | **2002.08** | **-0.10** | **0** | **58** | **8.6e-005** | **1** | **0.740** | **1.001** | **-0.124** | **0.694** | **0.611** | **2.150** | **K.NEDSLVFVQTDK.S** 6727 6728 6729 6731 6732 |
|  | 6809 | **507.48** | **2025.89** | **2026.00** | **-0.11** | **0** | **0** | **19** | **1** | **---** | **---** | **---** | **---** | **---** | **---** | **K.HYDGSYSTFGER.Y** |
|  | 6847 | **678.36** | **2032.06** | **2032.24** | **-0.18** | **0** | **23** | **0.32** | **1** | **---** | **---** | **---** | **---** | **---** | **---** | **K.SIYKPGQTVK.F** |
|  | 6986 | **686.33** | **2055.96** | **2056.05** | **-0.08** | **0** | **(30)** | **0.039** | **1** | **2.879** | **5.675** | **1.860** | **4.878** | **3.480** | **1.140** | **K.DMYSFLEDMGLK.A** 6989 6990 |
|  | 7123 | **696.98** | **2087.93** | **2088.04** | **-0.11** | **0** | **49** | **0.0003** | **1** | **1.566** | **0.222** | **1.001** | **0.955** | **0.937** | **0.957** | **K.DMYSFLEDMGLK.A** |
|  | 7204 | **700.68** | **2099.01** | **2099.20** | **-0.19** | **0** | **56** | **9.7e-005** | **1** | **0.979** | **1.335** | **1.011** | **1.459** | **1.802** | **1.521** | **R.NQGNTWLTAFVLK.T** 7206 |
|  | 7353 | **707.37** | **2119.09** | **2119.17** | **-0.08** | **0** | **66** | **1.5e-005** | **1** | **2.345** | **1.328** | **0.513** | **0.306** | **0.133** | **5.109** | **K.AAQVTIQSSGTFSSK.F** 7271 7274 7278 7282 7286 7292 7293 7300 7312 7314 7315 7320 7321 7324 7329 7333 7336 7337 7338 7340 7344 7348 7357 7363 7367 7369 7370 7373 7376 7377 7378 7382 7383 7385 7387 7388 7389 7390 7393 7397 7398 7399 7400 7401 7407 7408 7412 7413 7414 7556 | **709.65** | **2125.94** | **2126.13** | **-0.19** | **0** | **(47)** | **0.00038** | **1** | **---** | **---** | **---** | **---** | **---** | **---** | **K.YDVENCLANK.V** 7558 7559 7560 7562 |
|  | 7783 | **718.04** | **2151.10** | **2151.15** | **-0.05** | **0** | **46** | **0.0017** | **1** | **0.576** | **0.899** | **3.122** | **0.908** | **0.588** | **1.251** | **K.VTGEGCVYLQTSLK.Y** 7645 7648 7650 7651 7654 7656 7659 7660 7663 7664 7665 7666 7668 7669 7674 7677 7682 7683 7687 7688 7692 7694 7696 7698 7701 7702 7704 7705 7708 7711 7712 7713 7719 7720 7722 7723 7726 7727 7730 7731 7732 7734 7735 7737 7738 7740 7744 7747 7748 7889 | **542.78** | **2167.10** | **2167.25** | **-0.15** | **0** | **(11)** | **4.4** | **1** | **---** | **---** | **---** | **---** | **---** | **---** | **K.AIGYLNTGYQR.Q** |
|  | 7937 | **1087.55** | **2173.09** | **2173.24** | **-0.15** | **0** | **85** | **1.7e-007** | **1** | **0.658** | **1.130** | **0.764** | **1.003** | **1.015** | **1.387** | **K.ALLAYAFALAGNQDK.R** 7931 7933 7934 7936 7939 7940 7941 7942 7943 7945 7946 7947 7948 7949 7950 7951 7952 7953 7954 7955 7956 7957 7958 7959 7960 7961 7962 7963 7964 7965 7966 |
|  | 8405 | **738.42** | **2212.23** | **2212.25** | **-0.01** | **0** | **62** | **4.7e-005** | **1** | **1.420** | **1.025** | **1.274** | **1.403** | **1.030** | **1.334** | **R.IAQWQSFQLEGGLK.Q** 8320 8325 8326 8328 8329 8330 8331 8333 8335 8340 8341 8348 8349 8351 8353 8355 8356 8357 8359 8360 8361 8362 8364 8367 8368 8372 8374 8375 8376 8378 8379 8381 8382 8383 8384 8386 8388 8389 8390 8392 8393 8394 8395 8399 8406 8408 8410 |
|  | 8677 | **761.04** | **2280.09** | **2280.26** | **-0.18** | **0** | **45** | **0.0011** | **1** | **1.328** | **1.366** | **1.463** | **1.030** | **1.171** | **1.664** | **R.TEHPFTVEEFVLPK.F** 8678 8679 |
|  | 8780 | **577.07** | **2304.26** | **2304.37** | **-0.10** | **1** | **29** | **0.096** | **1** | **---** | **---** | **---** | **---** | **---** | **---** | **K.KLSFYYLIMAK.G** 8778 8779 8786 8787 8788 8790 8791 8793 |
|  | 8858 | **774.70** | **2321.08** | **2321.24** | **-0.16** | **0** | **58** | **4.6e-005** | **1** | **0.710** | **0.439** | **1.003** | **0.701** | **1.209** | **1.339** | **K.SSSNEEVMFLTVQVK.G** 8857 8860 8862 8865 8872 8873 8880 8881 8882 8885 8889 8890 8893 8894 8895 8896 8897 8900 8901 8903 8904 8908 8909 8910 8912 8913 8914 8915 8916 8917 8919 8920 8921 8922 8924 8926 8928 8930 8933 8934 8937 8938 8939 8941 8942 8944 8946 8947 8948 8994 | **777.12** | **2328.34** | **2328.44** | **-0.10** | **0** | **22** | **0.46** | **1** | **---** | **---** | **---** | **---** | **---** | **---** | **K.MVSGFIPLKPTVK.M** 8993 |
|  | 9008 | **583.31** | **2329.23** | **2329.34** | **-0.11** | **1** | **54** | **0.00027** | **1** | **0.904** | **1.330** | **1.257** | **2.023** | **1.425** | **2.020** | **K.ALLAYAFALAGNQDKR.K** 8998 9001 9003 9006 9007 9009 9010 9012 9013 9016 9019 |
|  | 9054 | **585.08** | **2336.30** | **2336.45** | **-0.15** | **0** | **(11)** | **5.8** | **1** | **---** | **---** | **---** | **---** | **---** | **---** | **K.SIYKPGQTVK.F** |
|  | 9065 | **587.07** | **2344.25** | **2344.43** | **-0.18** | **0** | **(19)** | **0.78** | **1** | **---** | **---** | **---** | **---** | **---** | **---** | **K.MVSGFIPLKPTVK.M** 9064 |
|  | 9070 | **783.75** | **2348.22** | **2348.25** | **-0.03** | **0** | **(52)** | **0.0004** | **1** | **1.589** | **1.491** | **1.246** | **0.762** | **0.771** | **1.354** | **R.AFQPFFVELTMPYSVIR.G** 9069 9071 9072 |
|  | 9118 | **1183.06** | **2364.10** | **2364.25** | **-0.14** | **0** | **85** | **1.1e-007** | **1** | **0.753** | **0.618** | **1.026** | **0.919** | **0.985** | **1.662** | **R.AFQPFFVELTMPYSVIR.G** 9109 9110 9111 9112 9114 9115 9116 9119 9120 9121 9122 9124 9125 9126 9127 9128 9129 9130 9131 9132 9134 9135 9136 9138 9139 9140 9141 9142 |
|  | 9265 | **800.31** | **2397.90** | **2398.08** | **-0.19** | **0** | **23** | **0.0097** | **1** | **1.278** | **0.786** | **0.748** | **1.329** | **1.216** | **1.162** | **K.MCPQLQQYEMHGPEGLR.V** 9269 |
|  | 9345 | **805.38** | **2413.11** | **2413.28** | **-0.16** | **0** | **84** | **1.2e-007** | **1** | **1.240** | **1.478** | **1.176** | **1.364** | **1.194** | **1.689** | **K.LHTEAQIQEEGTVVELTGR.Q** 9347 9348 9356 9357 9358 9359 9360 9366 9368 9370 9371 9372 9373 9374 9376 9378 9381 9382 9384 9386 9387 9388 9390 9392 9393 9394 9396 9403 9406 9407 9411 9412 9413 9414 9415 9416 9417 9418 9419 9420 |
|  | 9689 | **818.45** | **2452.32** | **2452.44** | **-0.12** | **0** | **108** | **1.1e-009** | **1** | **1.033** | **0.974** | **1.424** | **1.493** | **1.127** | **1.265** | **R.LLIYAVLPTGDVIGDSAK.Y** 9675 9676 9677 9678 9679 9680 9681 9682 9685 9686 9687 9691 9692 9694 9696 9697 9698 9699 9700 9701 9703 9704 9705 9706 9707 9709 9710 9711 9713 9715 9717 9719 9720 9724 9726 9727 9728 9729 9730 9732 9733 9734 9736 9737 9739 9740 9741 |
|  | 9757 | **819.74** | **2456.19** | **2456.28** | **-0.09** | **0** | **66** | **1e-005** | **1** | **2.930** | **1.294** | **0.454** | **1.304** | **0.915** | **1.218** | **K.QFSFPLSSEPFQGSYK.V** 9753 9754 9755 9756 9758 9760 9761 9762 |
|  | 9830 | **620.34** | **2477.32** | **2477.44** | **-0.12** | **0** | **(23)** | **0.3** | **1** | **---** | **---** | **---** | **---** | **---** | **---** | **K.ALLAYAFALAGNQDK.R** |
|  | 9890 | **831.44** | **2491.31** | **2491.45** | **-0.14** | **0** | **65** | **1.7e-005** | **1** | **0.862** | **1.513** | **1.614** | **0.751** | **1.199** | **0.804** | **R.VSVQLEASPAFLAVPVEK.E** 9883 9884 9885 9886 9887 9888 9889 9891 9894 9895 9896 9897 9898 9899 9901 9903 9904 9907 9908 9911 9912 9913 9916 9917 9918 9919 9920 9921 9922 |
|  | 10899 | **885.14** | **2652.39** | **2652.50** | **-0.11** | **0** | **(10)** | **6** | **1** | **---** | **---** | **---** | **---** | **---** | **---** | **R.LLLQQVSLPELPGEYSMK.V** |
|  | 10961 | **890.45** | **2668.34** | **2668.45** | **-0.12** | **0** | **(5)** | **19** | **1** | **---** | **---** | **---** | **---** | **---** | **---** | **R.AFQPFFVELTMPYSVIR.G** 10958 10970 |
|  | 10978 | **890.50** | **2668.46** | **2668.50** | **-0.03** | **0** | **72** | **4.1e-006** | **1** | **0.723** | **0.700** | **0.735** | **0.613** | **0.786** | **1.514** | **R.LLLQQVSLPELPGEYSMK.V** 10957 10959 10960 10963 10964 10965 10966 10967 10969 10971 10972 10973 10974 10975 10976 10977 |
|  | 11081 | **676.54** | **2702.13** | **2702.29** | **-0.16** | **0** | **(20)** | **0.072** | **1** | **---** | **---** | **---** | **---** | **---** | **---** | **K.MCPQLQQYEMHGPEGLR.V** |
|  | 11312 | **919.86** | **2756.54** | **2756.65** | **-0.10** | **0** | **(25)** | **0.21** | **1** | **---** | **---** | **---** | **---** | **---** | **---** | **R.LLIYAVLPTGDVIGDSAK.Y** 11311 |
|  | 11414 | **929.83** | **2786.48** | **2786.66** | **-0.19** | **2** | **1** | **51** | **3** | **---** | **---** | **---** | **---** | **---** | **---** | **K.KLSFYYLIMAKGGIVR.T** |
|  | 12331 | **998.82** | **2993.44** | **2993.52** | **-0.08** | **0** | **74** | **1.6e-006** | **1** | **-0.007** | **0.594** | **1.039** | **0.761** | **0.963** | **0.494** | **K.ETTFNSLLCPSGGEVSEELSLK.L** 12279 12281 12282 12284 12285 12286 12287 12288 12291 12294 12296 12297 12299 12300 12301 12302 12303 12304 12305 12306 12308 12309 12310 12311 12312 12313 12314 12315 12320 12321 12322 12323 12324 12325 12327 12332 12334 12335 12336 12338 12342 12347 12348 12349 |
|  | 12384 | **749.63** | **2994.49** | **2994.60** | **-0.11** | **0** | **73** | **2.3e-006** | **1** | **0.500** | **0.383** | **0.501** | **0.406** | **0.396** | **0.513** | **K.QQNAQGGFSSTQDTVVALHALSK.Y** 12362 12364 12366 12369 12371 12374 12376 12380 12382 12385 12387 12388 12391 |
|  | 12575 | **768.87** | **3071.43** | **3071.59** | **-0.16** | **0** | **71** | **2.3e-006** | **1** | **0.870** | **0.873** | **1.106** | **1.208** | **1.604** | **1.121** | **R.SLFTDLEAENDVLHCVAFAVPK.S** 12573 12574 12576 12579 12583 12587 12589 12593 12597 12601 12606 12608 12609 12612 12614 12615 12616 12619 12621 12623 12624 |
|  | 12888 | **1049.13** | **3144.35** | **3144.46** | **-0.10** | **0** | **63** | **4.1e-006** | **1** | **1.208** | **1.575** | **1.242** | **0.855** | **1.897** | **1.376** | **K.VYDYYETDEFAIAEYNAPCSK.D** 12873 12874 12875 12876 12877 12878 12879 12880 12881 12882 12883 12884 12885 12886 12887 12889 12890 12891 12892 12893 12894 12895 12896 12897 12898 |
|  | 13459 | **859.42** | **3433.67** | **3433.84** | **-0.17** | **0** | **46** | **0.001** | **1** | **0.887** | **0.719** | **0.967** | **1.184** | **0.863** | **0.923** | **R.VVSMDENFHPLNELIPLVYIQDPK.G** 13456 13457 13458 13460 13461 13462 13463 13464 13465 13466 13467 |
|  | 13509 | **863.13** | **3448.48** | **3448.66** | **-0.18** | **0** | **(27)** | **0.016** | **1** | **---** | **---** | **---** | **---** | **---** | **---** | **K.VYDYYETDEFAIAEYNAPCSK.D** 13506 13508 13510 13516 13519 |
|  | 13511 | **863.13** | **3448.49** | **3448.66** | **-0.17** | **0** | **(25)** | **0.025** | **1** | **---** | **---** | **---** | **---** | **---** | **---** | **K.VYDYYETDEFAIAEYNAPCSK.D** 13514 |
|  | 13512 | **863.13** | **3448.49** | **3448.66** | **-0.17** | **0** | **(42)** | **0.00052** | **1** | **---** | **---** | **---** | **---** | **---** | **---** | **K.VYDYYETDEFAIAEYNAPCSK.D** |
|  | 14060 | **935.21** | **3736.82** | **3737.01** | **-0.19** | **1** | **3** | **18** | **2** | **---** | **---** | **---** | **---** | **---** | **---** | **K.FRVVSMDENFHPLNELIPLVYIQDPK.G** |
|  | 14316 | **777.84** | **3884.16** | **3884.09** | **0.07** | **1** | **2** | **32** | **1** | **---** | **---** | **---** | **---** | **---** | **---** | **K.AHTSFQISLSVSYTGSRSASNMAIVDVK.M** |
|  | 14797 | **903.05** | **4510.23** | **4510.28** | **-0.05** | **1** | **(7)** | **6.2** | **1** | **---** | **---** | **---** | **---** | **---** | **---** | **R.HNVYINGITYTPVSSTNEKDMYSFLEDMGLK.A** |
|  | 14998 | **963.94** | **4814.64** | **4814.49** | **0.15** | **1** | **7** | **5.5** | **1** | **---** | **---** | **---** | **---** | **---** | **---** | **R.HNVYINGITYTPVSSTNEKDMYSFLEDMGLK.A** 14997 |
|  | 15207 | **1018.56** | **5087.77** | **5087.75** | **0.02** | **1** | **1** | **25** | **1** | **---** | **---** | **---** | **---** | **---** | **---** | **R.VTAAPQSVCALRAVDQSVLLMKPDAELSASSVYNLLPEK.D** |

  


---

|  |  |
| --- | --- |
| **2.** | P01024    **Mass:** 222951   **Score:** 4903   **Queries matched:** 459   **emPAI:** 1.54 |
|  | Complement C3 OS=Homo sapiens GN=C3 PE=1 SV=2 |

|  |  |  |  |  |  |
| --- | --- | --- | --- | --- | --- |
|  | **Quantitation:** | **Ratio** | **Weighted** | **N** | **SD(geo)** |
|  |  | Patient1-Art/Control | 1.012 | 131 | NN |
|  |  | Patient1-Porta/Control | 0.986 | 137 | NN |
|  |  | Patient1-Hepa/Control | 1.024 | 130 | NN |
|  |  | Patient3-Art/Control | 0.966 | 140 | 14.880 |
|  |  | Patient3-Porta/Control | 0.909 | 138 | NN |
|  |  | Patient3-Hepa/Control | 0.880 | 134 | NN |

|  |  |  |  |  |  |  |  |  |  |  |  |  |  |  |  |  |
| --- | --- | --- | --- | --- | --- | --- | --- | --- | --- | --- | --- | --- | --- | --- | --- | --- |
|  | **Query** | **Observed** | **Mr(expt)** | **Mr(calc)** | **Delta** | **Miss** | **Score** | **Expect** | **Rank** | **Patient1-Art/Control** | **Patient1-Porta/Control** | **Patient1-Hepa/Control** | **Patient3-Art/Control** | **Patient3-Porta/Control** | **Patient3-Hepa/Control** | **Peptide** |
|  | 701 | **479.78** | **957.55** | **957.63** | **-0.08** | **0** | **15** | **0.49** | **1** | **---** | **---** | **---** | **---** | **---** | **---** | **K.LLPVGR.T** 699 700 702 704 705 706 707 708 710 711 712 713 714 715 716 718 719 |
|  | 770 | **483.74** | **965.47** | **965.49** | **-0.02** | **0** | **7** | **8.8** | **1** | **---** | **---** | **---** | **---** | **---** | **---** | **R.ENPMR.F** 766 |
|  | 931 | **493.21** | **984.40** | **984.47** | **-0.06** | **0** | **23** | **0.13** | **1** | **---** | **---** | **---** | **---** | **---** | **---** | **R.DELCR.C** 932 933 |
|  | 948 | **495.68** | **989.34** | **989.47** | **-0.13** | **0** | **26** | **0.012** | **1** | **1.364** | **0.734** | **1.337** | **0.805** | **1.098** | **0.972** | **R.FSCQR.R** 945 946 947 949 950 951 952 953 954 955 958 |
|  | 1290 | **517.76** | **1033.50** | **1033.57** | **-0.07** | **0** | **8** | **5.3** | **3** | **---** | **---** | **---** | **---** | **---** | **---** | **R.TLDPER.L** 1289 1292 1293 |
|  | 1374 | **525.82** | **1049.63** | **1049.60** | **0.03** | **0** | **4** | **14** | **2** | **---** | **---** | **---** | **---** | **---** | **---** | **K.VTLEER.L** |
|  | 1479 | **537.28** | **1072.54** | **1072.65** | **-0.12** | **0** | **36** | **0.005** | **1** | **1.446** | **1.969** | **1.554** | **1.181** | **0.995** | **1.342** | **K.VVPEGIR.M** 1476 1477 1478 1480 1481 1482 1483 1484 1485 1487 |
|  | 1839 | **569.34** | **1136.66** | **1136.69** | **-0.03** | **0** | **10** | **6.4** | **1** | **---** | **---** | **---** | **---** | **---** | **---** | **R.LPYSVVR.N** 1832 |
|  | 2225 | **592.83** | **1183.64** | **1183.74** | **-0.10** | **0** | **9** | **7.9** | **1** | **---** | **---** | **---** | **---** | **---** | **---** | **K.LTQSK.I** |
|  | 2358 | **601.30** | **1200.59** | **1200.73** | **-0.14** | **0** | **19** | **0.69** | **1** | **---** | **---** | **---** | **---** | **---** | **---** | **K.FGLEK.R** 2357 2364 2368 2372 |
|  | 2379 | **601.83** | **1201.64** | **1201.68** | **-0.03** | **0** | **10** | **4.8** | **1** | **---** | **---** | **---** | **---** | **---** | **---** | **R.AVLYNYR.Q** |
|  | 2878 | **644.83** | **1287.64** | **1287.80** | **-0.16** | **0** | **4** | **25** | **1** | **---** | **---** | **---** | **---** | **---** | **---** | **K.FLTTAK.D** |
|  | 3127 | **670.34** | **1338.66** | **1338.80** | **-0.13** | **0** | **33** | **0.033** | **1** | **1.258** | **0.991** | **1.247** | **1.185** | **0.942** | **1.112** | **R.AEDLVGK.S** 3126 3128 3132 3133 3135 |
|  | 3349 | **692.34** | **1382.66** | **1382.86** | **-0.20** | **0** | **15** | **1.6** | **1** | **---** | **---** | **---** | **---** | **---** | **---** | **K.LVLSSEK.T** 3350 |
|  | 3362 | **692.90** | **1383.78** | **1383.87** | **-0.09** | **0** | **34** | **0.024** | **1** | **0.473** | **0.760** | **0.793** | **0.500** | **0.768** | **1.003** | **K.GVFVLNK.K** 3360 |
|  | 3370 | **694.39** | **1386.77** | **1386.76** | **0.01** | **0** | **33** | **0.051** | **1** | **---** | **---** | **---** | **---** | **---** | **---** | **K.GYTQQLAFR.Q** 3367 |
|  | 3504 | **706.87** | **1411.73** | **1411.85** | **-0.12** | **0** | **29** | **0.093** | **1** | **---** | **---** | **---** | **---** | **---** | **---** | **R.SVQLTEK.R** 3502 3503 3506 3507 3512 3514 |
|  | 3523 | **707.40** | **1412.79** | **1412.89** | **-0.09** | **0** | **21** | **0.6** | **1** | **---** | **---** | **---** | **---** | **---** | **---** | **R.TFISPIK.C** 3521 3522 3524 3525 3526 |
|  | 3545 | **707.89** | **1413.76** | **1413.82** | **-0.06** | **0** | **1** | **68** | **2** | **---** | **---** | **---** | **---** | **---** | **---** | **K.VLLDGVQNPR.A** |
|  | 3728 | **725.89** | **1449.77** | **1449.94** | **-0.17** | **0** | **46** | **0.0015** | **1** | **0.888** | **0.843** | **1.126** | **0.618** | **0.679** | **0.949** | **R.VVLVAVDK.G** 3729 3733 3734 3735 3736 3737 3738 3739 |
|  | 3845 | **489.57** | **1465.69** | **1465.89** | **-0.19** | **0** | **25** | **0.16** | **1** | **---** | **---** | **---** | **---** | **---** | **---** | **R.IFTVNHK.L** |
|  | 3908 | **740.39** | **1478.76** | **1478.93** | **-0.17** | **0** | **29** | **0.087** | **1** | **---** | **---** | **---** | **---** | **---** | **---** | **R.QGALELIK.K** 3909 3910 3912 |
|  | 3944 | **498.95** | **1493.81** | **1493.93** | **-0.11** | **0** | **27** | **0.13** | **1** | **---** | **---** | **---** | **---** | **---** | **---** | **R.ISLPESLK.R** 3943 3948 3949 3953 3955 |
|  | 3958 | **748.87** | **1495.72** | **1495.89** | **-0.16** | **0** | **26** | **0.14** | **1** | **---** | **---** | **---** | **---** | **---** | **---** | **K.IWDVVEK.A** 3960 |
|  | 4002 | **751.94** | **1501.86** | **1501.92** | **-0.06** | **0** | **27** | **0.13** | **1** | **---** | **---** | **---** | **---** | **---** | **---** | **K.LMNIFLK.D** 3994 3996 4003 |
|  | 4077 | **505.93** | **1514.77** | **1514.85** | **-0.09** | **0** | **21** | **0.53** | **1** | **---** | **---** | **---** | **---** | **---** | **---** | **R.IHWESASLLR.S** |
|  | 4245 | **780.32** | **1558.62** | **1558.78** | **-0.16** | **0** | **15** | **0.38** | **1** | **---** | **---** | **---** | **---** | **---** | **---** | **K.NTMILEICTR.Y** 4244 4246 4250 4251 |
|  | 4450 | **537.62** | **1609.82** | **1609.95** | **-0.13** | **0** | **52** | **0.0004** | **1** | **0.442** | **0.656** | **0.589** | **0.732** | **0.688** | **0.448** | **K.TGLQEVEVK.A** 4449 4451 4454 |
|  | 4482 | **541.28** | **1620.81** | **1620.88** | **-0.07** | **0** | **33** | **0.029** | **1** | **-0.010** | **0.911** | **0.381** | **0.594** | **0.714** | **0.612** | **R.FISLGEACK.K** |
|  | 4565 | **545.96** | **1634.86** | **1635.03** | **-0.17** | **1** | **32** | **0.042** | **1** | **1.359** | **1.300** | **1.061** | **1.360** | **1.248** | **1.210** | **K.RQGALELIK.K** 4564 4566 |
|  | 4660 | **550.96** | **1649.86** | **1650.03** | **-0.17** | **1** | **16** | **1.6** | **1** | **---** | **---** | **---** | **---** | **---** | **---** | **R.ISLPESLKR.I** 4662 |
|  | 4692 | **554.27** | **1659.79** | **1659.91** | **-0.12** | **0** | **34** | **0.018** | **1** | **1.183** | **1.276** | **1.398** | **0.436** | **0.788** | **0.654** | **K.DSCVGSLVVK.S** |
|  | 4895 | **567.64** | **1699.89** | **1700.03** | **-0.15** | **0** | **39** | **0.0094** | **1** | **0.375** | **0.378** | **0.646** | **0.287** | **0.225** | **0.427** | **R.NTLIIYLDK.V** 4896 |
|  | 5200 | **583.29** | **1746.83** | **1746.94** | **-0.11** | **0** | **20** | **0.4** | **1** | **---** | **---** | **---** | **---** | **---** | **---** | **K.FYYIYNEK.G** 5201 5203 |
|  | 5243 | **586.31** | **1755.92** | **1756.05** | **-0.12** | **0** | **15** | **1.8** | **1** | **---** | **---** | **---** | **---** | **---** | **---** | **R.HQQTVTIPPK.S** 5242 |
|  | 5266 | **880.93** | **1759.84** | **1760.01** | **-0.17** | **0** | **47** | **0.00083** | **1** | **0.593** | **1.300** | **1.038** | **1.168** | **0.661** | **0.457** | **R.QPSSAFAAFVK.R** 5267 5268 5269 5270 5271 5272 5273 |
|  | 5398 | **592.31** | **1773.91** | **1773.98** | **-0.06** | **0** | **13** | **3.2** | **1** | **---** | **---** | **---** | **---** | **---** | **---** | **R.IPIEDGSGEVVLSR.K** 5394 |
|  | 5498 | **599.03** | **1794.07** | **1794.19** | **-0.12** | **1** | **13** | **3.3** | **1** | **---** | **---** | **---** | **---** | **---** | **---** | **R.LKGPLLNK.F** 5493 5494 5495 5504 |
|  | 5556 | **600.66** | **1798.96** | **1798.99** | **-0.03** | **1** | **24** | **0.28** | **1** | **---** | **---** | **---** | **---** | **---** | **---** | **K.SDDKVTLEER.L** 5553 5554 5555 |
|  | 5642 | **605.98** | **1814.93** | **1815.02** | **-0.09** | **0** | **63** | **3.4e-005** | **1** | **1.817** | **1.190** | **0.695** | **1.140** | **1.114** | **1.266** | **R.LVAYYTLIGASGQR.E** 5635 5638 5639 5641 5644 5647 5648 5649 5650 5651 5652 5655 5657 5658 5662 |
|  | 5723 | **611.64** | **1831.89** | **1832.00** | **-0.11** | **0** | **34** | **0.019** | **1** | **0.717** | **1.068** | **0.802** | **0.413** | **1.010** | **1.237** | **R.YYTYLIMNK.G** 5724 |
|  | 5732 | **612.37** | **1834.08** | **1834.06** | **0.02** | **0** | **(3)** | **31** | **1** | **---** | **---** | **---** | **---** | **---** | **---** | **R.QPVPGQQMTLK.I** |
|  | 5831 | **616.32** | **1845.95** | **1846.12** | **-0.17** | **1** | **41** | **0.0044** | **1** | **1.342** | **1.201** | **1.200** | **1.285** | **1.276** | **1.078** | **R.KVLLDGVQNPR.A** 5829 5830 5833 |
|  | 5853 | **617.64** | **1849.88** | **1850.05** | **-0.17** | **0** | **33** | **0.022** | **1** | **0.846** | **0.804** | **1.012** | **0.539** | **0.652** | **0.867** | **R.QPVPGQQMTLK.I** 5854 5855 5858 5859 |
|  | 5989 | **624.68** | **1871.01** | **1871.15** | **-0.14** | **1** | **6** | **17** | **1** | **---** | **---** | **---** | **---** | **---** | **---** | **R.EALKLEEK.K** |
|  | 6032 | **628.90** | **1883.69** | **1883.89** | **-0.20** | **0** | **32** | **0.001** | **1** | **0.760** | **0.774** | **0.788** | **1.022** | **1.047** | **0.627** | **R.CAEENCFIQK.S** 6033 |
|  | 6102 | **633.27** | **1896.79** | **1896.96** | **-0.16** | **0** | **51** | **0.00012** | **1** | **0.867** | **1.172** | **0.914** | **0.999** | **0.977** | **0.913** | **K.ACEPGVDYVYK.T** 6101 6103 6105 6106 6107 6108 6109 6110 6111 6112 6113 6116 |
|  | 6302 | **644.31** | **1929.91** | **1930.08** | **-0.17** | **1** | **95** | **1.3e-008** | **1** | **1.750** | **1.694** | **2.546** | **2.258** | **2.073** | **2.949** | **K.RIPIEDGSGEVVLSR.K** 6312 6323 6324 6325 6327 6328 6329 6330 6332 |
|  | 6468 | **652.04** | **1953.11** | **1953.10** | **0.00** | **0** | **17** | **1.2** | **1** | **---** | **---** | **---** | **---** | **---** | **---** | **R.EVVADSVWVDVK.D** 6441 6451 6452 6455 6458 6461 6466 6471 |
|  | 6543 | **660.33** | **1977.96** | **1978.11** | **-0.15** | **1** | **24** | **0.22** | **1** | **---** | **---** | **---** | **---** | **---** | **---** | **K.AKDQLTCNK.F** 6544 |
|  | 6720 | **666.65** | **1996.92** | **1997.10** | **-0.18** | **1** | **51** | **0.00023** | **1** | **1.082** | **1.128** | **1.248** | **1.172** | **0.930** | **0.957** | **K.KQELSEAEQATR.T** 6721 |
|  | 6735 | **668.97** | **2003.89** | **2003.99** | **-0.10** | **0** | **20** | **0.23** | **1** | **---** | **---** | **---** | **---** | **---** | **---** | **K.VSHSEDDCLAFK.V** |
|  | 6768 | **1005.60** | **2009.18** | **2009.24** | **-0.06** | **0** | **68** | **1.1e-005** | **1** | **0.730** | **1.009** | **1.069** | **0.811** | **1.006** | **0.962** | **K.SSLSVPYVIVPLK.T** 6761 6762 6763 6764 6765 6766 6767 |
|  | 7069 | **691.04** | **2070.10** | **2070.21** | **-0.11** | **1** | **10** | **6.9** | **1** | **---** | **---** | **---** | **---** | **---** | **---** | **R.YISKYELDK.A** |
|  | 7436 | **707.38** | **2119.12** | **2119.23** | **-0.10** | **0** | **(41)** | **0.0049** | **1** | **---** | **---** | **---** | **---** | **---** | **---** | **R.LVAYYTLIGASGQR.E** 7451 7461 |
|  | 7480 | **707.66** | **2119.95** | **2120.09** | **-0.14** | **0** | **75** | **7.5e-007** | **1** | **1.362** | **1.687** | **1.394** | **1.287** | **0.999** | **1.291** | **R.SNLDEDIIAEENIVSR.S** 7482 7484 7487 7488 7490 |
|  | 7547 | **709.07** | **2124.20** | **2124.29** | **-0.09** | **0** | **10** | **6.2** | **1** | **---** | **---** | **---** | **---** | **---** | **---** | **K.VTIKPAPETEK.R** 7546 |
|  | 8089 | **726.08** | **2175.22** | **2175.23** | **-0.02** | **0** | **35** | **0.024** | **1** | **2.319** | **3.212** | **5.362** | **3.766** | **4.138** | **4.024** | **R.TELRPGETLNVNFLLR.M** 8024 8027 8031 8034 8055 8057 8061 8070 8071 8075 8076 8077 8081 8083 8084 8086 8087 8088 8097 |
|  | 8646 | **755.39** | **2263.14** | **2263.27** | **-0.13** | **0** | **56** | **0.00016** | **1** | **0.824** | **0.692** | **1.091** | **0.340** | **0.550** | **1.129** | **R.TVMVNIENPEGIPVK.Q** 8645 8647 8649 |
|  | 8732 | **766.08** | **2295.21** | **2295.25** | **-0.04** | **0** | **8** | **10** | **1** | **---** | **---** | **---** | **---** | **---** | **---** | **R.SYTVAIAGYALAQMGR.L** |
|  | 9210 | **796.36** | **2386.05** | **2386.23** | **-0.19** | **0** | **69** | **2e-006** | **1** | **0.900** | **0.869** | **1.068** | **0.774** | **0.767** | **0.552** | **K.DICEEQVNSLPGSITK.A** 9211 9212 9213 9214 9215 9217 9218 9222 |
|  | 9252 | **799.41** | **2395.21** | **2395.37** | **-0.16** | **0** | **16** | **1.2** | **1** | **---** | **---** | **---** | **---** | **---** | **---** | **R.SGIPIVTSPYQIHFTK.T** 9251 |
|  | 9257 | **800.08** | **2397.23** | **2397.30** | **-0.07** | **0** | **63** | **2.9e-005** | **1** | **0.795** | **0.777** | **0.968** | **0.680** | **0.776** | **0.815** | **R.VELLHNPAFCSLATTK.R** 9255 9256 9258 9259 9260 9262 |
|  | 9432 | **605.80** | **2419.18** | **2419.37** | **-0.19** | **0** | **24** | **0.19** | **1** | **---** | **---** | **---** | **---** | **---** | **---** | **K.GQGTLSVVTMYHAK.A** |
|  | 9606 | **817.44** | **2449.30** | **2449.39** | **-0.09** | **0** | **5** | **22** | **1** | **---** | **---** | **---** | **---** | **---** | **---** | **K.VHQYFNVELIQPGAVK.V** |
|  | 9768 | **820.01** | **2457.01** | **2457.04** | **-0.04** | **0** | **34** | **0.0022** | **1** | **-0.006** | **0.465** | **3.404** | **0.609** | **0.326** | **-0.013** | **K.QCQDLGAFTESMVVFGCPN.-** 9767 9769 9770 |
|  | 9789 | **821.08** | **2460.22** | **2460.28** | **-0.06** | **0** | **(57)** | **0.0001** | **1** | **###** | **###** | **###** | **---** | **---** | **---** | **R.ILLQGTPVAQMTEDAVDAER.L** 9784 9785 9786 9787 9788 9790 9791 |
|  | 9820 | **826.38** | **2476.13** | **2476.28** | **-0.15** | **0** | **105** | **7.6e-010** | **1** | **1.399** | **1.154** | **1.760** | **1.562** | **1.247** | **1.010** | **R.ILLQGTPVAQMTEDAVDAER.L** 9821 9822 9823 9824 9825 9826 |
|  | 9846 | **829.78** | **2486.30** | **2486.38** | **-0.07** | **0** | **31** | **0.046** | **1** | **0.549** | **0.630** | **0.737** | **1.015** | **0.838** | **1.065** | **K.EYVLPSFEVIVEPTEK.F** 9838 9839 9841 9842 9843 9844 9845 9847 9848 |
|  | 10411 | **633.57** | **2530.25** | **2530.45** | **-0.20** | **2** | **27** | **0.083** | **1** | **---** | **---** | **---** | **---** | **---** | **---** | **R.TKKQELSEAEQATR.T** |
|  | 10721 | **868.11** | **2601.31** | **2601.44** | **-0.13** | **1** | **43** | **0.0025** | **1** | **3.498** | **2.367** | **0.220** | **0.915** | **2.195** | **1.194** | **K.KVEGTAFVIFGIQDGEQR.I** 10718 10719 10722 10723 10725 10726 10727 10729 10732 10733 10734 10735 10736 10737 10739 10741 10742 10743 10744 10746 10748 10749 10750 10752 10753 10755 10756 |
|  | 10900 | **664.11** | **2652.40** | **2652.47** | **-0.07** | **1** | **20** | **0.63** | **1** | **---** | **---** | **---** | **---** | **---** | **---** | **K.VRVELLHNPAFCSLATTK.R** |
|  | 11280 | **916.80** | **2747.38** | **2747.51** | **-0.13** | **0** | **88** | **7.4e-008** | **1** | **-0.017** | **1.487** | **1.472** | **0.447** | **0.835** | **1.004** | **R.EPGQDLVVLPLSITTDFIPSFR.L** 11269 11270 11271 11272 11273 11274 11275 11276 11277 11279 11281 11282 11283 11284 11285 11286 11287 11288 11289 11290 11291 11292 11293 11294 11296 11297 11298 11299 11300 |
|  | 11356 | **692.86** | **2767.40** | **2767.46** | **-0.07** | **1** | **33** | **0.026** | **1** | **0.578** | **0.770** | **0.618** | **1.076** | **0.840** | **0.392** | **R.SEETKENEGFTVTAEGK.G** 11338 11339 11340 11342 11343 11345 11346 11347 11348 11349 11350 11351 11353 11355 |
|  | 11359 | **925.43** | **2773.26** | **2773.41** | **-0.15** | **0** | **42** | **0.0012** | **1** | **0.614** | **0.716** | **1.600** | **0.986** | **0.695** | **1.087** | **R.AYYENSPQQVFSTEFEVK.E** 11358 11360 |
|  | 11555 | **936.16** | **2805.44** | **2805.53** | **-0.09** | **0** | **79** | **7.3e-007** | **1** | **1.783** | **1.388** | **1.055** | **1.507** | **1.274** | **1.533** | **R.VPVAVQGEDTVQSLTQGDGVAK.L** 11549 11550 11554 11556 11557 11558 |
|  | 11749 | **955.81** | **2864.41** | **2864.51** | **-0.10** | **0** | **(67)** | **8.2e-006** | **1** | **1.659** | **1.509** | **0.883** | **1.032** | **0.811** | **0.861** | **K.VQLSNDFDEYIMAIEQTIK.S** 11745 11746 11747 11750 11751 11752 11753 11754 |
|  | 11832 | **961.12** | **2880.35** | **2880.50** | **-0.16** | **0** | **81** | **2.1e-007** | **1** | **1.537** | **1.217** | **1.177** | **0.914** | **1.187** | **1.155** | **K.VQLSNDFDEYIMAIEQTIK.S** 11827 11828 11829 11830 11831 11833 11834 11835 11836 11838 11839 11840 11841 11842 11843 11844 11845 11846 11847 11848 11849 11850 11851 11853 11855 11856 11857 11859 11860 11861 |
|  | 11899 | **722.63** | **2886.48** | **2886.54** | **-0.06** | **0** | **5** | **17** | **1** | **---** | **---** | **---** | **---** | **---** | **---** | **K.SLYVSATVILHSGSDMVQAER.S** |
|  | 12845 | **1044.54** | **3130.58** | **3130.73** | **-0.15** | **1** | **4** | **19** | **1** | **---** | **---** | **---** | **---** | **---** | **---** | **R.QVREPGQDLVVLPLSITTDFIPSFR.L** |
|  | 13186 | **820.17** | **3276.65** | **3276.82** | **-0.16** | **1** | **8** | **6.9** | **1** | **---** | **---** | **---** | **---** | **---** | **---** | **R.NNNEKDMALTAFVLISLQEAK.D** 13196 |
|  | 13230 | **826.63** | **3302.51** | **3302.65** | **-0.14** | **0** | **27** | **0.04** | **1** | **---** | **---** | **---** | **---** | **---** | **---** | **R.YYGGGYGSTQATFMVFQALAQYQK.D** 13231 |
|  | 13328 | **844.17** | **3372.66** | **3372.71** | **-0.05** | **0** | **(46)** | **0.00098** | **1** | **###** | **###** | **###** | **###** | **###** | **###** | **K.YFKPGMPFDLMVFVTNPDGSPAYR.V** 13326 13327 |
|  | 13375 | **848.15** | **3388.56** | **3388.71** | **-0.14** | **0** | **52** | **0.00013** | **1** | **0.869** | **0.890** | **2.501** | **0.239** | **0.805** | **0.606** | **K.YFKPGMPFDLMVFVTNPDGSPAYR.V** 13373 13374 13376 |
|  | 14488 | **1034.55** | **4134.16** | **4133.99** | **0.17** | **1** | **6** | **11** | **1** | **---** | **---** | **---** | **---** | **---** | **---** | **K.ADIGCTPGSGKDYAGVFSDAGLTFTSSSGQQTAQR.A** 14487 |
|  | 14494 | **830.23** | **4146.13** | **4146.27** | **-0.14** | **2** | **16** | **1** | **1** | **---** | **---** | **---** | **---** | **---** | **---** | **R.SEFPESWLWNVEDLKEPPKNGISTK.L** |

  


---

|  |  |
| --- | --- |
| **3.** | P02652    **Mass:** 14606    **Score:** 3179   **Queries matched:** 137   **emPAI:** 12.49 |
|  | Apolipoprotein A-II OS=Homo sapiens GN=APOA2 PE=1 SV=1 |

|  |  |  |  |  |  |
| --- | --- | --- | --- | --- | --- |
|  | **Quantitation:** | **Ratio** | **Weighted** | **N** | **SD(geo)** |
|  |  | **Patient1-Art/Control** | **0.684** | **54** | **1.325** |
|  |  | **Patient1-Porta/Control** | **0.601** | **54** | **1.333** |
|  |  | Patient1-Hepa/Control | 0.694 | 46 | NN |
|  |  | Patient3-Art/Control | 0.801 | 60 | NN |
|  |  | Patient3-Porta/Control | 0.707 | 60 | NN |
|  |  | **Patient3-Hepa/Control** | **0.764** | **56** | **1.346** |

|  |  |  |  |  |  |  |  |  |  |  |  |  |  |  |  |  |
| --- | --- | --- | --- | --- | --- | --- | --- | --- | --- | --- | --- | --- | --- | --- | --- | --- |
|  | **Query** | **Observed** | **Mr(expt)** | **Mr(calc)** | **Delta** | **Miss** | **Score** | **Expect** | **Rank** | **Patient1-Art/Control** | **Patient1-Porta/Control** | **Patient1-Hepa/Control** | **Patient3-Art/Control** | **Patient3-Porta/Control** | **Patient3-Hepa/Control** | **Peptide** |
|  | 2621 | **622.34** | **1242.68** | **1242.71** | **-0.04** | **0** | **17** | **0.91** | **1** | **---** | **---** | **---** | **---** | **---** | **---** | **K.DLMEK.V** 2619 |
|  | 2678 | **630.33** | **1258.65** | **1258.71** | **-0.06** | **0** | **(11)** | **4** | **1** | **---** | **---** | **---** | **---** | **---** | **---** | **K.DLMEK.V** 2674 2675 2676 2680 2681 |
|  | 2809 | **641.28** | **1280.54** | **1280.72** | **-0.18** | **0** | **18** | **0.46** | **1** | **---** | **---** | **---** | **---** | **---** | **---** | **K.SYFEK.S** 2811 2812 2813 2814 2817 2819 2820 2823 2825 2829 2830 2831 2832 2833 2834 2835 2836 2837 2838 2839 2841 |
|  | 4378 | **527.60** | **1579.79** | **1579.90** | **-0.12** | **0** | **37** | **0.013** | **1** | **0.486** | **0.717** | **0.653** | **0.604** | **0.805** | **0.745** | **K.SPELQAEAK.S** 4377 4379 4380 |
|  | 7063 | **690.40** | **2068.16** | **2068.30** | **-0.14** | **1** | **22** | **0.44** | **1** | **---** | **---** | **---** | **---** | **---** | **---** | **K.SKEQLTPLIK.K** 7064 |
|  | 7240 | **704.71** | **2111.12** | **2111.27** | **-0.15** | **1** | **40** | **0.0065** | **1** | **1.169** | **0.558** | **1.807** | **1.600** | **1.119** | **1.373** | **K.VKSPELQAEAK.S** 7238 7241 |
|  | 11015 | **897.11** | **2688.31** | **2688.40** | **-0.08** | **0** | **110** | **4.5e-010** | **1** | **0.666** | **0.391** | **0.741** | **0.058** | **0.590** | **0.355** | **K.AGTELVNFLSYFVELGTQPATQ.-** 10997 10998 10999 11000 11001 11002 11003 11004 11005 11006 11007 11008 11009 11010 11011 11012 11013 11014 11016 11018 11019 11020 11021 11022 11023 11024 11025 11026 11027 11028 11029 11030 11031 11033 11034 11036 |
|  | 12135 | **983.12** | **2946.33** | **2946.46** | **-0.13** | **0** | **91** | **1.6e-008** | **1** | **0.586** | **0.443** | **0.579** | **0.536** | **0.500** | **0.684** | **K.EPCVESLVSQYFQTVTDYGK.D** 12121 12122 12123 12124 12125 12126 12127 12128 12129 12130 12131 12132 12133 12136 12137 12138 12139 12140 12141 12142 12143 12145 12148 12149 12150 12152 12153 12154 |
|  | 12816 | **1041.23** | **3120.66** | **3120.70** | **-0.04** | **1** | **120** | **5.7e-011** | **1** | **0.872** | **0.677** | **0.865** | **0.837** | **1.304** | **1.960** | **K.KAGTELVNFLSYFVELGTQPATQ.-** 12788 12789 12790 12791 12792 12793 12794 12795 12796 12797 12798 12799 12800 12801 12802 12803 12804 12805 12806 12807 12809 12810 12812 12813 12814 12815 12818 |
|  | 13150 | **813.64** | **3250.54** | **3250.67** | **-0.12** | **0** | **(20)** | **0.3** | **1** | **---** | **---** | **---** | **---** | **---** | **---** | **K.EPCVESLVSQYFQTVTDYGK.D** |
|  | 13151 | **813.65** | **3250.56** | **3250.67** | **-0.11** | **0** | **(25)** | **0.11** | **1** | **---** | **---** | **---** | **---** | **---** | **---** | **K.EPCVESLVSQYFQTVTDYGK.D** |
|  | 13429 | **857.20** | **3424.77** | **3424.90** | **-0.13** | **1** | **(19)** | **0.71** | **1** | **---** | **---** | **---** | **---** | **---** | **---** | **K.KAGTELVNFLSYFVELGTQPATQ.-** |
|  | 14310 | **971.71** | **3882.79** | **3882.95** | **-0.16** | **1** | **12** | **1.3** | **1** | **---** | **---** | **---** | **---** | **---** | **---** | **K.EPCVESLVSQYFQTVTDYGKDLMEK.V** |

  


---

|  |  |
| --- | --- |
| **4.** | P04114    **Mass:** 625296   **Score:** 2938   **Queries matched:** 236   **emPAI:** 0.28 |
|  | Apolipoprotein B-100 OS=Homo sapiens GN=APOB PE=1 SV=1 |

|  |  |  |  |  |  |
| --- | --- | --- | --- | --- | --- |
|  | **Quantitation:** | **Ratio** | **Weighted** | **N** | **SD(geo)** |
|  |  | Patient1-Art/Control | 1.257 | 90 | NN |
|  |  | Patient1-Porta/Control | 1.268 | 90 | NN |
|  |  | Patient1-Hepa/Control | 1.171 | 93 | NN |
|  |  | Patient3-Art/Control | 1.208 | 94 | NN |
|  |  | Patient3-Porta/Control | 1.178 | 90 | NN |
|  |  | Patient3-Hepa/Control | 1.141 | 92 | NN |

|  |  |  |  |  |  |  |  |  |  |  |  |  |  |  |  |  |
| --- | --- | --- | --- | --- | --- | --- | --- | --- | --- | --- | --- | --- | --- | --- | --- | --- |
|  | **Query** | **Observed** | **Mr(expt)** | **Mr(calc)** | **Delta** | **Miss** | **Score** | **Expect** | **Rank** | **Patient1-Art/Control** | **Patient1-Porta/Control** | **Patient1-Hepa/Control** | **Patient3-Art/Control** | **Patient3-Porta/Control** | **Patient3-Hepa/Control** | **Peptide** |
|  | 565 | **468.76** | **935.51** | **935.53** | **-0.03** | **0** | **13** | **2.3** | **2** | **---** | **---** | **---** | **---** | **---** | **---** | **R.EVTQR.L** |
|  | 1335 | **523.78** | **1045.55** | **1045.66** | **-0.10** | **0** | **37** | **0.0098** | **1** | **1.100** | **0.849** | **0.606** | **0.753** | **1.018** | **1.341** | **K.AAIQALR.K** |
|  | 1436 | **534.28** | **1066.54** | **1066.70** | **-0.16** | **0** | **6** | **48** | **3** | **---** | **---** | **---** | **---** | **---** | **---** | **R.AALGK.L** |
|  | 1457 | **534.79** | **1067.57** | **1067.60** | **-0.02** | **0** | **5** | **27** | **1** | **---** | **---** | **---** | **---** | **---** | **---** | **K.MLETVR.T** 1460 |
|  | 1502 | **539.31** | **1076.61** | **1076.67** | **-0.06** | **0** | **17** | **0.95** | **1** | **---** | **---** | **---** | **---** | **---** | **---** | **K.LLLMGAR.T** |
|  | 1961 | **578.34** | **1154.66** | **1154.75** | **-0.09** | **0** | **4** | **32** | **2** | **---** | **---** | **---** | **---** | **---** | **---** | **K.SSILK.C** 1943 |
|  | 1985 | **578.76** | **1155.51** | **1155.53** | **-0.03** | **0** | **23** | **0.15** | **1** | **---** | **---** | **---** | **---** | **---** | **---** | **R.DLGQCDR.F** 1978 1986 1988 1994 1996 2001 2003 2004 2005 |
|  | 2018 | **579.30** | **1156.59** | **1156.69** | **-0.11** | **0** | **4** | **20** | **2** | **---** | **---** | **---** | **---** | **---** | **---** | **R.EVSSK.L** |
|  | 2261 | **596.85** | **1191.68** | **1191.78** | **-0.10** | **0** | **2** | **26** | **1** | **---** | **---** | **---** | **---** | **---** | **---** | **K.LNIPK.L** |
|  | 2553 | **615.32** | **1228.63** | **1228.80** | **-0.17** | **0** | **19** | **0.47** | **1** | **---** | **---** | **---** | **---** | **---** | **---** | **K.LTIFK.T** 2554 2557 |
|  | 2649 | **627.87** | **1253.72** | **1253.82** | **-0.10** | **0** | **22** | **0.38** | **1** | **---** | **---** | **---** | **---** | **---** | **---** | **K.LTALTK.K** 2648 |
|  | 2713 | **634.39** | **1266.76** | **1266.81** | **-0.05** | **0** | **17** | **1.5** | **1** | **---** | **---** | **---** | **---** | **---** | **---** | **K.AIQSLK.T** |
|  | 2769 | **639.34** | **1276.66** | **1276.69** | **-0.03** | **0** | **17** | **1.1** | **1** | **---** | **---** | **---** | **---** | **---** | **---** | **R.QIDDIDVR.F** 2763 |
|  | 2803 | **640.99** | **1279.97** | **1279.87** | **0.10** | **0** | **5** | **6.9** | **1** | **---** | **---** | **---** | **---** | **---** | **---** | **K.IVSLIK.N** |
|  | 2971 | **655.88** | **1309.74** | **1309.77** | **-0.03** | **0** | **6** | **15** | **1** | **---** | **---** | **---** | **---** | **---** | **---** | **K.LEDTPK.I** |
|  | 3126 | 670.33 | 1338.64 | 1338.83 | -0.20 | 0 | 8 | 9.8 | 2 | --- | --- | --- | --- | --- | --- | K.TLQELK.K 3130 |
|  | 3148 | **672.40** | **1342.78** | **1342.84** | **-0.06** | **0** | **42** | **0.012** | **1** | **###** | **###** | **###** | **###** | **###** | **###** | **K.LAPGELTIIL.-** 3147 3149 3150 |
|  | 3155 | **672.88** | **1343.75** | **1343.86** | **-0.11** | **0** | **20** | **0.53** | **1** | **---** | **---** | **---** | **---** | **---** | **---** | **K.LYSILK.I** |
|  | 3400 | **695.99** | **1389.98** | **1389.82** | **0.15** | **0** | **5** | **9.5** | **1** | **---** | **---** | **---** | **---** | **---** | **---** | **K.NIFNFK.V** |
|  | 3442 | **700.29** | **1398.57** | **1398.71** | **-0.14** | **0** | **1** | **12** | **3** | **---** | **---** | **---** | **---** | **---** | **---** | **R.VPETDMTFR.H** |
|  | 3569 | **709.38** | **1416.74** | **1416.78** | **-0.03** | **0** | **15** | **2.2** | **1** | **---** | **---** | **---** | **---** | **---** | **---** | **R.LAAYLMLMR.S** 3562 3566 3575 |
|  | 3590 | **474.56** | **1420.67** | **1420.87** | **-0.20** | **0** | **22** | **0.27** | **1** | **---** | **---** | **---** | **---** | **---** | **---** | **R.TPALHFK.S** 3591 3592 3594 3597 |
|  | 3715 | **482.56** | **1444.67** | **1444.81** | **-0.14** | **0** | **32** | **0.032** | **1** | **0.844** | **0.931** | **1.020** | **0.637** | **0.576** | **0.513** | **K.HINIDQFVR.K** |
|  | 3822 | **487.58** | **1459.73** | **1459.81** | **-0.08** | **0** | **30** | **0.055** | **1** | **1.083** | **1.204** | **0.700** | **0.820** | **1.065** | **0.832** | **K.SPAFTDLHLR.Y** |
|  | 3859 | **490.90** | **1469.67** | **1469.78** | **-0.11** | **1** | **8** | **5.9** | **2** | **---** | **---** | **---** | **---** | **---** | **---** | **K.FRETLEDTR.D** |
|  | 4125 | **508.61** | **1522.80** | **1522.89** | **-0.09** | **1** | **6** | **14** | **1** | **---** | **---** | **---** | **---** | **---** | **---** | **K.SKEVPEAR.A** |
|  | 4133 | **509.02** | **1524.03** | **1523.84** | **0.19** | **0** | **7** | **9.7** | **1** | **---** | **---** | **---** | **---** | **---** | **---** | **K.HVAEAICK.E** 4129 |
|  | 4293 | **521.62** | **1561.84** | **1562.00** | **-0.16** | **1** | **0** | **71** | **6** | **---** | **---** | **---** | **---** | **---** | **---** | **K.IKFDK.Y** |
|  | 4479 | **540.97** | **1619.90** | **1620.04** | **-0.14** | **0** | **55** | **0.00022** | **1** | **1.179** | **0.922** | **1.150** | **1.056** | **1.194** | **1.133** | **R.TGISPLALIK.G** 4480 |
|  | 4667 | **551.97** | **1652.88** | **1653.01** | **-0.13** | **0** | **22** | **0.36** | **1** | **---** | **---** | **---** | **---** | **---** | **---** | **R.IPSVQINFK.D** 4668 |
|  | 4684 | **552.64** | **1654.90** | **1654.98** | **-0.08** | **0** | **7** | **12** | **1** | **---** | **---** | **---** | **---** | **---** | **---** | **K.FPEVDVLTK.Y** |
|  | 4793 | **839.98** | **1677.95** | **1678.03** | **-0.08** | **0** | **50** | **0.00073** | **1** | **1.234** | **1.131** | **1.193** | **1.094** | **1.037** | **1.037** | **K.IEIPLPFGGK.S** 4790 4791 4792 |
|  | 4876 | **565.95** | **1694.84** | **1695.01** | **-0.17** | **1** | **28** | **0.1** | **1** | **---** | **---** | **---** | **---** | **---** | **---** | **K.DKIGVELTGR.T** 4878 |
|  | 5457 | **596.32** | **1785.93** | **1786.02** | **-0.10** | **0** | **40** | **0.0072** | **1** | **1.278** | **1.289** | **0.868** | **0.933** | **1.033** | **0.989** | **K.VLVDHFGYTK.D** 5458 |
|  | 6013 | **627.32** | **1878.93** | **1879.09** | **-0.16** | **0** | **65** | **1.7e-005** | **1** | **1.557** | **2.222** | **1.322** | **2.256** | **1.962** | **2.030** | **K.SVSLPSLDPASAK.I** 6012 6014 6016 6017 6019 6020 6022 |
|  | 6050 | **629.36** | **1885.06** | **1884.99** | **0.07** | **0** | **16** | **1.8** | **1** | **---** | **---** | **---** | **---** | **---** | **---** | **K.AVSMPSFSILGSDVR.V** |
|  | 6130 | **634.00** | **1898.99** | **1899.11** | **-0.13** | **0** | **38** | **0.0098** | **1** | **1.249** | **1.163** | **1.707** | **0.882** | **0.980** | **1.178** | **K.LIVAMSSWLQK.A** 6132 6133 |
|  | 6200 | **639.65** | **1915.93** | **1916.09** | **-0.15** | **0** | **56** | **0.00012** | **1** | **1.548** | **1.338** | **1.180** | **1.419** | **1.183** | **1.211** | **K.GFEPTLEALFGK.Q** 6201 6202 6206 6207 6208 6209 6210 6211 6212 6213 6214 6215 6216 6217 6218 |
|  | 6367 | **646.68** | **1937.01** | **1937.15** | **-0.14** | **1** | **29** | **0.078** | **1** | **---** | **---** | **---** | **---** | **---** | **---** | **K.KLTISEQNIQR.A** |
|  | 6503 | **655.01** | **1962.00** | **1962.11** | **-0.11** | **0** | **33** | **0.029** | **1** | **2.484** | **2.305** | **2.036** | **2.114** | **0.812** | **2.103** | **K.YGMVAQVTQTLK.L** 6505 |
|  | 6633 | **665.70** | **1994.08** | **1994.19** | **-0.11** | **0** | **73** | **3.3e-006** | **1** | **2.089** | **2.193** | **1.973** | **3.112** | **2.025** | **1.958** | **K.IAELSATAQEIIK.S** 6625 6626 6630 6632 6636 6641 6647 6649 6650 6653 6657 6658 6660 6661 6662 6664 6665 6667 6668 6669 6670 6674 6675 6678 6680 6681 6684 6685 6688 6692 |
|  | 6741 | **670.03** | **2007.08** | **2007.21** | **-0.13** | **0** | **69** | **7.8e-006** | **1** | **1.237** | **1.471** | **1.562** | **0.831** | **0.646** | **1.168** | **R.TLADLTLLDSPIK.V** 6742 6743 6744 6745 |
|  | 6871 | **680.36** | **2038.05** | **2038.19** | **-0.14** | **0** | **70** | **6e-006** | **1** | **0.654** | **0.663** | **2.142** | **1.771** | **1.905** | **1.203** | **K.ALVEQGFTVPEIK.T** 6872 6873 6874 6877 |
|  | 7607 | **713.35** | **2137.02** | **2137.17** | **-0.15** | **0** | **57** | **8.7e-005** | **1** | **1.094** | **0.838** | **1.092** | **0.964** | **0.432** | **0.907** | **K.ATFQTPDFIVPLTDLR.I** 7609 7610 7612 7613 7614 |
|  | 7878 | **723.03** | **2166.08** | **2166.20** | **-0.12** | **0** | **57** | **0.00012** | **1** | **1.086** | **0.591** | **0.893** | **0.875** | **0.752** | **0.761** | **R.ITENDIQIALDDAK.I** 7881 7882 7883 |
|  | 8117 | **726.73** | **2177.15** | **2177.25** | **-0.10** | **0** | **57** | **0.00015** | **1** | **0.000** | **-0.014** | **0.905** | **1.216** | **1.459** | **0.263** | **K.FSVPAGIVIPSFQALTAR.F** 8115 8116 8118 8119 8120 8121 8123 |
|  | 8258 | **737.40** | **2209.19** | **2209.26** | **-0.07** | **0** | **9** | **8.6** | **1** | **---** | **---** | **---** | **---** | **---** | **---** | **K.VSALLTPAEQTGTWK.L** |
|  | 8467 | **742.44** | **2224.29** | **2224.29** | **-0.00** | **0** | **49** | **0.00081** | **1** | **0.820** | **0.840** | **1.517** | **0.628** | **0.604** | **1.090** | **R.TSSFALNLPTLPEVK.F** 8462 8463 8465 |
|  | 8493 | **746.68** | **2237.01** | **2237.15** | **-0.14** | **0** | **26** | **0.063** | **1** | **---** | **---** | **---** | **---** | **---** | **---** | **K.MTSNFPVDLSDYPK.S** 8494 8495 8496 |
|  | 8650 | **756.05** | **2265.14** | **2265.28** | **-0.14** | **0** | **60** | **5.3e-005** | **1** | **0.752** | **1.160** | **1.212** | **0.966** | **1.225** | **0.549** | **K.SVSDGIAALDLNAVANK.I** 8651 8652 |
|  | 8657 | **759.06** | **2274.17** | **2274.33** | **-0.16** | **0** | **66** | **1.5e-005** | **1** | **0.695** | **1.009** | **0.487** | **0.924** | **0.938** | **0.985** | **R.GIISALLVPPETEEAK.Q** 8658 8659 8660 8661 8662 8663 8664 8665 |
|  | 8835 | **772.06** | **2313.15** | **2313.27** | **-0.12** | **0** | **53** | **0.00025** | **1** | **0.834** | **0.792** | **0.878** | **0.921** | **0.604** | **0.368** | **R.NIQEYLSILTDPDGK.G** 8837 8840 |
|  | 9085 | **785.72** | **2354.13** | **2354.31** | **-0.18** | **0** | **57** | **8.2e-005** | **1** | **1.189** | **0.935** | **0.863** | **0.903** | **0.871** | **1.395** | **K.IEGNLIFDPNNYLPK.E** 9086 9087 9088 9089 9090 9091 9092 9094 |
|  | 9099 | **786.10** | **2355.27** | **2355.34** | **-0.06** | **0** | **76** | **1.7e-006** | **1** | **1.755** | **0.378** | **0.570** | **0.628** | **0.769** | **1.030** | **K.VPLLLSEPINIIDALEMR.D** 9096 9098 |
|  | 9101 | **787.02** | **2358.04** | **2358.18** | **-0.14** | **0** | **48** | **0.00027** | **1** | **1.187** | **1.246** | **1.159** | **1.072** | **1.162** | **0.940** | **K.LQDFSDQLSDYYEK.F** |
|  | 9591 | **610.30** | **2437.16** | **2437.34** | **-0.18** | **0** | **56** | **9.1e-005** | **1** | **---** | **---** | **---** | **---** | **---** | **---** | **K.AEPLAFTFSHDYK.G** |
|  | 10398 | **843.76** | **2528.26** | **2528.34** | **-0.08** | **0** | **48** | **0.00082** | **1** | **-0.017** | **1.463** | **0.295** | **1.329** | **1.445** | **0.582** | **R.VIGNMGQTMEQLTPELK.S** 10394 10395 10396 10397 10399 |
|  | 10433 | **846.44** | **2536.30** | **2536.31** | **-0.00** | **0** | **34** | **0.02** | **1** | **1.269** | **1.190** | **1.114** | **1.530** | **1.125** | **1.031** | **K.NLTDFAEQYSIQDWAK.R** 10429 10431 10432 |
|  | 10451 | **849.81** | **2546.40** | **2546.51** | **-0.12** | **0** | **64** | **2.5e-005** | **1** | **1.803** | **1.747** | **1.747** | **1.614** | **1.700** | **1.215** | **R.VPSYTLILPSLELPVLHVPR.N** 10450 10452 10453 |
|  | 10522 | **857.77** | **2570.30** | **2570.46** | **-0.16** | **0** | **57** | **0.00011** | **1** | **1.166** | **1.251** | **0.938** | **1.381** | **0.854** | **1.076** | **K.TILGTMPAFEVSLQALQK.A** 10523 10524 10525 10526 10527 10528 |
|  | 10926 | **666.12** | **2660.43** | **2660.54** | **-0.10** | **0** | **50** | **0.00063** | **1** | **0.999** | **2.051** | **0.904** | **1.552** | **1.578** | **1.871** | **R.ILGEELGFASLHDLQLLGK.L** 10922 10923 10925 10927 |
|  | 11690 | **713.66** | **2850.63** | **2850.72** | **-0.09** | **0** | **(37)** | **0.012** | **1** | **---** | **---** | **---** | **---** | **---** | **---** | **R.VPSYTLILPSLELPVLHVPR.N** |
|  | 12658 | **1025.56** | **3073.65** | **3073.78** | **-0.13** | **0** | **47** | **0.0011** | **1** | **1.055** | **1.629** | **1.379** | **1.173** | **1.421** | **1.455** | **K.IADFELPTIIVPEQTIEIPSIK.F** 12653 12654 12655 12656 12657 12659 12662 12663 12664 12665 |
|  | 12900 | **630.12** | **3145.59** | **3145.62** | **-0.04** | **1** | **0** | **46** | **3** | **---** | **---** | **---** | **---** | **---** | **---** | **K.VSQEGLKLSNDMMGSYAEMK.F** |
|  | 14429 | **1013.01** | **4048.01** | **4048.15** | **-0.15** | **0** | **1** | **32** | **2** | **---** | **---** | **---** | **---** | **---** | **---** | **K.YSQPEDSLIPFFEITVPESQLTVSQFTLPK.S** |

  


---

|  |  |
| --- | --- |
| **5.** | P02647    **Mass:** 37756    **Score:** 2317   **Queries matched:** 218   **emPAI:** 7.07 |
|  | Apolipoprotein A-I OS=Homo sapiens GN=APOA1 PE=1 SV=1 |

|  |  |  |  |  |  |
| --- | --- | --- | --- | --- | --- |
|  | **Quantitation:** | **Ratio** | **Weighted** | **N** | **SD(geo)** |
|  |  | Patient1-Art/Control | 1.064 | 80 | NN |
|  |  | Patient1-Porta/Control | 1.022 | 81 | NN |
|  |  | Patient1-Hepa/Control | 0.940 | 78 | NN |
|  |  | Patient3-Art/Control | 0.733 | 80 | NN |
|  |  | Patient3-Porta/Control | 0.846 | 80 | 4.140 |
|  |  | Patient3-Hepa/Control | 0.844 | 80 | NN |

|  |  |  |  |  |  |  |  |  |  |  |  |  |  |  |  |  |
| --- | --- | --- | --- | --- | --- | --- | --- | --- | --- | --- | --- | --- | --- | --- | --- | --- |
|  | **Query** | **Observed** | **Mr(expt)** | **Mr(calc)** | **Delta** | **Miss** | **Score** | **Expect** | **Rank** | **Patient1-Art/Control** | **Patient1-Porta/Control** | **Patient1-Hepa/Control** | **Patient3-Art/Control** | **Patient3-Porta/Control** | **Patient3-Hepa/Control** | **Peptide** |
|  | 517 | **459.27** | **916.53** | **916.56** | **-0.03** | **0** | **14** | **0.81** | **1** | **---** | **---** | **---** | **---** | **---** | **---** | **K.VEPLR.A** 510 511 512 514 515 518 520 521 522 |
|  | 1543 | **543.31** | **1084.60** | **1084.63** | **-0.03** | **0** | **32** | **0.038** | **1** | **5.258** | **4.089** | **1.484** | **1.870** | **2.921** | **1.168** | **R.AHVDALR.T** 1538 |
|  | 2089 | **589.24** | **1176.46** | **1176.64** | **-0.18** | **0** | **19** | **0.22** | **2** | **---** | **---** | **---** | **---** | **---** | **---** | **R.AELQEGAR.Q** 2090 |
|  | 2188 | **591.35** | **1180.68** | **1180.76** | **-0.09** | **0** | **19** | **0.78** | **1** | **---** | **---** | **---** | **---** | **---** | **---** | **R.LEALK.E** 2175 2176 2177 2178 2179 2182 2186 2190 2191 2193 2194 2195 2197 2200 2205 |
|  | 2476 | **606.32** | **1210.62** | **1210.75** | **-0.13** | **1** | **9** | **7.7** | **1** | **---** | **---** | **---** | **---** | **---** | **---** | **K.KLNTQ.-** 2474 2475 2481 |
|  | 2536 | **612.34** | **1222.66** | **1222.79** | **-0.12** | **0** | **16** | **1.5** | **2** | **---** | **---** | **---** | **---** | **---** | **---** | **K.QLNLK.L** 2530 2531 2533 2534 2535 2537 2538 2539 2540 2542 |
|  | 3140 | **670.84** | **1339.67** | **1339.78** | **-0.11** | **0** | **30** | **0.072** | **1** | **---** | **---** | **---** | **---** | **---** | **---** | **K.DLEEVK.A** 3138 3139 3141 3142 3143 |
|  | 3172 | **676.31** | **1350.62** | **1350.71** | **-0.10** | **0** | **30** | **0.031** | **1** | **0.701** | **0.529** | **1.088** | **0.548** | **0.737** | **1.230** | **K.LSPLGEEMR.D** 3169 3170 3171 3173 3174 3175 |
|  | 3686 | **480.56** | **1438.66** | **1438.84** | **-0.18** | **0** | **19** | **0.53** | **1** | **---** | **---** | **---** | **---** | **---** | **---** | **R.LAEYHAK.A** 3687 3688 3689 3692 3695 |
|  | 3887 | **493.31** | **1476.90** | **1476.92** | **-0.02** | **1** | **6** | **13** | **1** | **---** | **---** | **---** | **---** | **---** | **---** | **R.QKVEPLR.A** 3885 |
|  | 4011 | **502.25** | **1503.74** | **1503.89** | **-0.15** | **0** | **42** | **0.0035** | **1** | **0.745** | **0.573** | **0.574** | **0.024** | **0.612** | **0.860** | **K.LHELQEK.L** 4008 4009 4010 4014 4019 4021 |
|  | 4432 | **802.37** | **1602.73** | **1602.77** | **-0.04** | **0** | **10** | **3.8** | **1** | **---** | **---** | **---** | **---** | **---** | **---** | **K.WQEEMELYR.Q** |
|  | 4436 | **535.89** | **1604.65** | **1604.85** | **-0.19** | **0** | **74** | **5.8e-007** | **1** | **1.427** | **0.862** | **1.176** | **0.421** | **1.521** | **1.062** | **R.THLAPYSDELR.Q** 4437 4438 |
|  | 4441 | **536.23** | **1605.66** | **1605.85** | **-0.18** | **1** | **18** | **0.22** | **1** | **---** | **---** | **---** | **---** | **---** | **---** | **K.LSPLGEEMRDR.A** |
|  | 4477 | **540.95** | **1619.84** | **1619.98** | **-0.14** | **0** | **20** | **0.68** | **1** | **---** | **---** | **---** | **---** | **---** | **---** | **K.AKPALEDLR.Q** 4476 |
|  | 4490 | **541.56** | **1621.67** | **1621.84** | **-0.17** | **1** | **(14)** | **0.65** | **1** | **---** | **---** | **---** | **---** | **---** | **---** | **K.LSPLGEEMRDR.A** 4489 4493 4495 |
|  | 5181 | **581.99** | **1742.95** | **1743.04** | **-0.10** | **0** | **(6)** | **19** | **1** | **---** | **---** | **---** | **---** | **---** | **---** | **R.LAEYHAK.A** 5175 5186 |
|  | 5321 | **589.30** | **1764.89** | **1765.03** | **-0.14** | **1** | **15** | **1.7** | **1** | **---** | **---** | **---** | **---** | **---** | **---** | **R.LEALKENGGAR.L** |
|  | 5384 | **591.29** | **1770.85** | **1770.99** | **-0.14** | **1** | **19** | **0.52** | **1** | **---** | **---** | **---** | **---** | **---** | **---** | **K.VEPLRAELQEGAR.Q** 5387 5388 |
|  | 5691 | **608.65** | **1822.92** | **1823.02** | **-0.10** | **0** | **15** | **2** | **1** | **---** | **---** | **---** | **---** | **---** | **---** | **K.ATEHLSTLSEK.A** 5690 |
|  | 5742 | **613.68** | **1838.02** | **1838.11** | **-0.10** | **0** | **47** | **0.0013** | **1** | **0.581** | **0.605** | **0.941** | **0.298** | **0.336** | **0.671** | **R.QGLLPVLESFK.V** 5743 5744 5745 5746 5747 |
|  | 5766 | **922.47** | **1842.93** | **1843.09** | **-0.16** | **0** | **74** | **2.3e-006** | **1** | **1.112** | **0.954** | **1.088** | **0.781** | **0.758** | **0.710** | **K.DLATVYVDVLK.D** 5767 5768 5769 5770 5771 5772 5773 5774 5775 5778 5779 5780 5785 5788 5789 5791 5792 5793 5794 5795 5797 5799 5800 5802 5803 5804 5806 5808 5809 5810 5812 5814 |
|  | 5841 | 463.22 | 1848.84 | 1848.98 | -0.13 | 2 | 1 | 23 | 9 | --- | --- | --- | --- | --- | --- | K.LSPLGEEMRDRAR.A |
|  | 5902 | **620.95** | **1859.83** | **1860.02** | **-0.19** | **0** | **46** | **0.00063** | **1** | **0.928** | **0.834** | **0.730** | **0.775** | **0.676** | **1.120** | **K.VQPYLDDFQK.K** 5901 5903 5905 5906 5907 5909 5910 5911 5912 |
|  | 6164 | **637.30** | **1908.88** | **1909.05** | **-0.17** | **0** | **(30)** | **0.037** | **1** | **---** | **---** | **---** | **---** | **---** | **---** | **R.THLAPYSDELR.Q** 6165 |
|  | 6622 | **665.66** | **1993.96** | **1994.12** | **-0.16** | **0** | **54** | **0.0002** | **1** | **1.072** | **1.151** | **0.583** | **0.662** | **0.532** | **0.813** | **K.VSFLSALEEYTK.K** 6621 6623 6624 6625 6627 6628 6676 |
|  | 6753 | **670.33** | **2007.98** | **2008.07** | **-0.09** | **0** | **78** | **7.2e-007** | **1** | **0.568** | **0.812** | **0.641** | **0.511** | **0.419** | **0.684** | **R.DYVSQFEGSALGK.Q** 6748 6749 6750 6751 6752 6754 6755 6756 6757 |
|  | 6860 | **679.31** | **2034.91** | **2035.07** | **-0.16** | **1** | **21** | **0.16** | **1** | **---** | **---** | **---** | **---** | **---** | **---** | **K.KWQEEMELYR.Q** |
|  | 7016 | **517.12** | **2064.43** | **2064.25** | **0.19** | **1** | **9** | **1.5** | **1** | **---** | **---** | **---** | **---** | **---** | **---** | **R.QKLHELQEK.L** 7010 7011 7014 |
|  | 7876 | **722.35** | **2164.04** | **2164.23** | **-0.19** | **0** | **(9)** | **5.3** | **1** | **---** | **---** | **---** | **---** | **---** | **---** | **K.VQPYLDDFQK.K** 7877 |
|  | 8441 | **741.04** | **2220.10** | **2220.19** | **-0.09** | **0** | **67** | **1e-005** | **1** | **1.166** | **0.800** | **1.038** | **0.626** | **0.762** | **0.743** | **K.LLDNWDSVTSTFSK.L** 8427 8428 8429 8431 8432 8433 8434 8435 8436 8437 8438 8439 8440 8442 8443 8444 8445 8446 8447 8448 8450 8451 8452 8453 8455 8456 |
|  | 9040 | **583.82** | **2331.23** | **2331.35** | **-0.11** | **2** | **19** | **0.82** | **1** | **---** | **---** | **---** | **---** | **---** | **---** | **R.QKVEPLRAELQEGAR.Q** 9042 |
|  | 9174 | **594.59** | **2374.32** | **2374.46** | **-0.14** | **1** | **46** | **0.0015** | **1** | **1.508** | **1.220** | **1.020** | **0.752** | **1.382** | **1.123** | **R.VKDLATVYVDVLK.D** 9171 9172 9173 9175 9177 9179 9180 9181 9182 9183 9187 |
|  | 9487 | **606.78** | **2423.07** | **2423.25** | **-0.18** | **1** | **42** | **0.0011** | **1** | **1.313** | **1.324** | **1.201** | **1.303** | **1.296** | **0.921** | **K.DSGRDYVSQFEGSALGK.Q** 9485 9486 9488 |
|  | 10436 | **847.74** | **2540.20** | **2540.34** | **-0.14** | **0** | **49** | **0.00044** | **1** | **1.005** | **0.987** | **0.443** | **0.548** | **0.457** | **0.712** | **R.EQLGPVTQEFWDNLEK.E** 10437 |
|  | 11560 | **703.36** | **2809.39** | **2809.52** | **-0.13** | **1** | **54** | **0.0002** | **1** | **0.892** | **0.871** | **0.895** | **0.345** | **0.437** | **0.553** | **K.LREQLGPVTQEFWDNLEK.E** |

  


---

|  |  |
| --- | --- |
| **6.** | P02671    **Mass:** 108897   **Score:** 2147   **Queries matched:** 266   **emPAI:** 1.63 |
|  | Fibrinogen alpha chain OS=Homo sapiens GN=FGA PE=1 SV=2 |

|  |  |  |  |  |  |
| --- | --- | --- | --- | --- | --- |
|  | **Quantitation:** | **Ratio** | **Weighted** | **N** | **SD(geo)** |
|  |  | Patient1-Art/Control | 0.997 | 50 | NN |
|  |  | Patient1-Porta/Control | 1.022 | 52 | NN |
|  |  | Patient1-Hepa/Control | 0.806 | 53 | NN |
|  |  | Patient3-Art/Control | 0.867 | 55 | NN |
|  |  | Patient3-Porta/Control | 0.879 | 53 | NN |
|  |  | Patient3-Hepa/Control | 0.722 | 53 | 5.771 |

|  |  |  |  |  |  |  |  |  |  |  |  |  |  |  |  |  |
| --- | --- | --- | --- | --- | --- | --- | --- | --- | --- | --- | --- | --- | --- | --- | --- | --- |
|  | **Query** | **Observed** | **Mr(expt)** | **Mr(calc)** | **Delta** | **Miss** | **Score** | **Expect** | **Rank** | **Patient1-Art/Control** | **Patient1-Porta/Control** | **Patient1-Hepa/Control** | **Patient3-Art/Control** | **Patient3-Porta/Control** | **Patient3-Hepa/Control** | **Peptide** |
|  | 1070 | **502.75** | **1003.48** | **1003.60** | **-0.12** | **0** | **26** | **0.071** | **1** | **---** | **---** | **---** | **---** | **---** | **---** | **K.DLLPSR.D** 1063 1065 1066 1067 1068 1069 1071 1072 1073 1074 1075 1076 1077 1078 1079 1080 1081 1082 1083 1084 1085 1086 1087 1088 1089 |
|  | 1198 | **509.66** | **1017.30** | **1017.42** | **-0.11** | **0** | **12** | **0.16** | **1** | **---** | **---** | **---** | **---** | **---** | **---** | **K.CPSGCR.M** 1199 1200 1201 1202 1203 1205 1206 1207 1208 1210 1212 1216 |
|  | 1243 | **511.76** | **1021.50** | **1021.57** | **-0.07** | **0** | **28** | **0.065** | **1** | **---** | **---** | **---** | **---** | **---** | **---** | **R.VSEDLR.S** 1241 1242 1244 1245 1246 1248 1249 1250 |
|  | 1547 | **543.75** | **1085.48** | **1085.54** | **-0.06** | **0** | **19** | **0.58** | **1** | **---** | **---** | **---** | **---** | **---** | **---** | **R.DNTYNR.V** 1548 |
|  | 1959 | **578.33** | **1154.65** | **1154.75** | **-0.09** | **0** | **19** | **1.1** | **1** | **---** | **---** | **---** | **---** | **---** | **---** | **K.LVTSK.G** 1946 1949 1952 1957 1958 1960 1963 1964 1965 1966 1968 1969 1970 1971 1973 1975 |
|  | 2459 | **605.31** | **1208.60** | **1208.80** | **-0.19** | **0** | **21** | **0.54** | **1** | **---** | **---** | **---** | **---** | **---** | **---** | **R.IEVLK.R** 2460 2461 2462 2463 2464 2466 |
|  | 2480 | **606.33** | **1210.64** | **1210.75** | **-0.11** | **0** | **8** | **11** | **1** | **---** | **---** | **---** | **---** | **---** | **---** | **K.SQLQK.V** |
|  | 2709 | **633.79** | **1265.56** | **1265.71** | **-0.15** | **0** | **13** | **1.8** | **1** | **---** | **---** | **---** | **---** | **---** | **---** | **K.SSSYSK.Q** |
|  | 2733 | **636.27** | **1270.53** | **1270.62** | **-0.09** | **0** | **27** | **0.05** | **1** | **0.940** | **1.180** | **0.702** | **0.809** | **0.786** | **0.552** | **R.GDFSSANNR.D** 2732 |
|  | 3006 | **657.79** | **1313.56** | **1313.71** | **-0.15** | **0** | **35** | **0.0066** | **1** | **0.877** | **0.534** | **0.090** | **0.943** | **1.772** | **0.528** | **K.VTSGSTTTTR.R** |
|  | 3065 | **442.57** | **1324.68** | **1324.79** | **-0.12** | **1** | **6** | **18** | **1** | **---** | **---** | **---** | **---** | **---** | **---** | **K.GDKELR.T** |
|  | 3223 | **682.35** | **1362.68** | **1362.81** | **-0.13** | **0** | **33** | **0.022** | **1** | **1.273** | **1.349** | **0.923** | **1.156** | **1.185** | **0.906** | **K.VPPEWK.A** 3219 3222 3224 3229 3234 3235 3236 3237 3238 3240 3242 3243 3246 3248 |
|  | 3259 | **455.91** | **1364.71** | **1364.90** | **-0.19** | **1** | **12** | **3.9** | **2** | **---** | **---** | **---** | **---** | **---** | **---** | **R.IEVLKR.K** 3261 |
|  | 3437 | **699.83** | **1397.64** | **1397.69** | **-0.05** | **0** | **29** | **0.057** | **1** | **---** | **---** | **---** | **---** | **---** | **---** | **K.ALTDMPQMR.M** 3433 3434 3436 |
|  | 3510 | **471.62** | **1411.83** | **1411.83** | **-0.00** | **0** | **(2)** | **48** | **2** | **---** | **---** | **---** | **---** | **---** | **---** | **R.AQLVDMK.R** |
|  | 3628 | **714.86** | **1427.70** | **1427.83** | **-0.13** | **0** | **30** | **0.052** | **1** | **0.828** | **1.187** | **0.468** | **1.093** | **0.808** | **0.949** | **R.AQLVDMK.R** 3627 3629 3632 3633 3634 3635 3636 3637 3640 3641 3643 3645 3646 3647 3648 3649 3651 |
|  | 3800 | **486.36** | **1456.04** | **1455.94** | **0.11** | **0** | **24** | **0.28** | **1** | **---** | **---** | **---** | **---** | **---** | **---** | **R.QHLPLIK.M** 3789 3791 3792 3793 3797 3801 |
|  | 3894 | **739.87** | **1477.72** | **1477.79** | **-0.06** | **0** | **36** | **0.011** | **1** | **1.104** | **0.941** | **0.743** | **0.978** | **0.906** | **0.649** | **R.GDSTFESK.S** 3890 3891 3893 3895 |
|  | 4154 | **510.29** | **1527.84** | **1528.01** | **-0.17** | **1** | **7** | **14** | **2** | **---** | **---** | **---** | **---** | **---** | **---** | **R.KVIEK.V** |
|  | 4174 | **511.27** | **1530.78** | **1530.90** | **-0.12** | **0** | **40** | **0.006** | **1** | **0.827** | **0.879** | **0.676** | **0.807** | **0.950** | **0.731** | **K.TVIGPDGHK.E** |
|  | 4188 | **768.92** | **1535.82** | **1535.95** | **-0.13** | **0** | **40** | **0.0076** | **1** | **1.090** | **1.078** | **0.839** | **1.103** | **0.956** | **0.899** | **K.QLEQVIAK.D** 4184 4185 4187 4189 4190 4191 |
|  | 4571 | **546.29** | **1635.84** | **1635.91** | **-0.06** | **0** | **14** | **2.3** | **1** | **---** | **---** | **---** | **---** | **---** | **---** | **K.NSLFEYQK.N** 4570 |
|  | 4982 | **570.34** | **1708.00** | **1708.03** | **-0.04** | **1** | **40** | **0.0078** | **1** | **0.609** | **0.906** | **0.791** | **0.788** | **0.859** | **0.631** | **K.RLEVDIDIK.I** 4916 4927 4930 4933 4934 4935 4936 4942 4943 4944 4946 4948 4949 4950 4951 4952 4953 4956 4965 4970 4971 4972 4973 4975 4976 4977 4978 4981 4986 4987 4988 4990 4992 4993 4995 4996 |
|  | 5036 | **572.31** | **1713.92** | **1714.07** | **-0.15** | **0** | **44** | **0.0031** | **1** | **0.827** | **0.841** | **0.731** | **0.079** | **0.862** | **0.557** | **K.VQHIQLLQK.N** |
|  | 5064 | **576.66** | **1726.97** | **1727.07** | **-0.10** | **1** | **17** | **1.4** | **1** | **---** | **---** | **---** | **---** | **---** | **---** | **R.DRQHLPLIK.M** 5066 5067 5069 5070 |
|  | 5213 | **874.95** | **1747.88** | **1747.96** | **-0.08** | **0** | **56** | **0.00015** | **1** | **1.023** | **1.225** | **0.471** | **1.358** | **1.036** | **0.610** | **R.GSESGIFTNTK.E** 5206 5207 5208 5209 5210 5211 5212 5214 5216 5217 5219 |
|  | 5672 | **607.96** | **1820.87** | **1820.94** | **-0.07** | **0** | **1** | **32** | **1** | **---** | **---** | **---** | **---** | **---** | **---** | **R.MELERPGGNEITR.G** |
|  | 5707 | **608.96** | **1823.87** | **1823.93** | **-0.06** | **0** | **82** | **3.2e-007** | **1** | **0.590** | **1.202** | **1.301** | **0.813** | **0.459** | **0.709** | **K.GLIDEVNQDFTNR.I** 5692 5693 5694 5696 5697 5698 5699 5700 5701 5702 5703 5704 5705 5706 5708 5709 5710 5711 5712 |
|  | 6336 | **645.32** | **1932.93** | **1933.02** | **-0.10** | **0** | **(33)** | **0.024** | **1** | **2.554** | **1.157** | **2.122** | **1.380** | **0.953** | **2.508** | **K.DSHSLTTNIMEILR.G** |
|  | 6420 | **650.62** | **1948.85** | **1949.02** | **-0.17** | **0** | **54** | **9.9e-005** | **1** | **0.689** | **0.774** | **0.942** | **0.490** | **0.771** | **0.774** | **K.DSHSLTTNIMEILR.G** 6421 |
|  | 8133 | **728.08** | **2181.23** | **2181.29** | **-0.06** | **1** | **2** | **39** | **1** | **---** | **---** | **---** | **---** | **---** | **---** | **K.LKNSLFEYQK.N** |
|  | 8203 | **734.66** | **2200.95** | **2201.12** | **-0.17** | **0** | **51** | **0.00013** | **1** | **0.794** | **0.854** | **0.680** | **0.631** | **0.545** | **0.537** | **R.HPDEAAFFDTASTGK.T** 8205 |
|  | 8716 | **574.05** | **2292.19** | **2292.36** | **-0.17** | **1** | **31** | **0.047** | **1** | **1.300** | **1.418** | **1.096** | **1.195** | **1.624** | **0.969** | **K.TVIGPDGHKEVTK.E** 8717 |
|  | 9080 | **589.31** | **2353.23** | **2353.40** | **-0.17** | **0** | **25** | **0.21** | **1** | **---** | **---** | **---** | **---** | **---** | **---** | **K.MKPVPDLVPGNFK.S** 9082 |
|  | 9154 | **593.31** | **2369.20** | **2369.39** | **-0.19** | **0** | **(25)** | **0.2** | **1** | **---** | **---** | **---** | **---** | **---** | **---** | **K.MKPVPDLVPGNFK.S** 9153 9155 9156 9157 9159 9160 |
|  | 9450 | **808.05** | **2421.14** | **2421.32** | **-0.18** | **1** | **19** | **0.39** | **1** | **---** | **---** | **---** | **---** | **---** | **---** | **R.EVDLKDYEDQQK.Q** 9446 |
|  | 10486 | **854.34** | **2560.00** | **2560.11** | **-0.12** | **0** | **2** | **1.4** | **1** | **---** | **---** | **---** | **---** | **---** | **---** | **K.DSDWPFCSDEDWNYK.C** |
|  | 10519 | **857.09** | **2568.26** | **2568.25** | **0.01** | **0** | **(58)** | **7e-005** | **1** | **1.156** | **1.360** | **3.061** | **1.181** | **2.277** | **0.740** | **K.TFPGFFSPMLGEFVSETESR.G** |
|  | 10546 | **862.37** | **2584.10** | **2584.25** | **-0.15** | **0** | **103** | **4.7e-010** | **1** | **0.000** | **-0.008** | **0.551** | **-0.014** | **-0.000** | **0.000** | **K.TFPGFFSPMLGEFVSETESR.G** 10545 10547 10548 10549 10550 10551 10552 10553 10554 10555 10556 10558 10559 10560 |
|  | 10577 | **649.32** | **2593.24** | **2593.41** | **-0.17** | **1** | **70** | **3.6e-006** | **1** | **1.909** | **1.961** | **1.044** | **1.491** | **1.809** | **0.872** | **K.NNKDSHSLTTNIMEILR.G** 10578 |
|  | 10809 | **653.32** | **2609.25** | **2609.41** | **-0.16** | **1** | **(14)** | **1.6** | **1** | **---** | **---** | **---** | **---** | **---** | **---** | **K.NNKDSHSLTTNIMEILR.G** |
|  | 13471 | **1146.47** | **3436.37** | **3436.56** | **-0.19** | **0** | **100** | **1.6e-010** | **1** | **0.000** | **0.000** | **0.000** | **0.000** | **0.000** | **0.000** | **K.EVVTSEDGSDCPEAMDLGTLSGIGTLDGFR.H** 13472 13474 13475 13476 13477 13478 13480 |

  


---

|  |  |
| --- | --- |
| **7.** | P01011    **Mass:** 55972    **Score:** 1988   **Queries matched:** 285   **emPAI:** 1.47 |
|  | Alpha-1-antichymotrypsin OS=Homo sapiens GN=SERPINA3 PE=1 SV=2 |

|  |  |  |  |  |  |
| --- | --- | --- | --- | --- | --- |
|  | **Quantitation:** | **Ratio** | **Weighted** | **N** | **SD(geo)** |
|  |  | **Patient1-Art/Control** | **1.093** | **57** | **1.459** |
|  |  | **Patient1-Porta/Control** | **1.080** | **57** | **1.513** |
|  |  | Patient1-Hepa/Control | 1.175 | 54 | NN |
|  |  | Patient3-Art/Control | 0.796 | 57 | NN |
|  |  | **Patient3-Porta/Control** | **0.696** | **57** | **1.467** |
|  |  | Patient3-Hepa/Control | 0.715 | 51 | NN |

|  |  |  |  |  |  |  |  |  |  |  |  |  |  |  |  |  |
| --- | --- | --- | --- | --- | --- | --- | --- | --- | --- | --- | --- | --- | --- | --- | --- | --- |
|  | **Query** | **Observed** | **Mr(expt)** | **Mr(calc)** | **Delta** | **Miss** | **Score** | **Expect** | **Rank** | **Patient1-Art/Control** | **Patient1-Porta/Control** | **Patient1-Hepa/Control** | **Patient3-Art/Control** | **Patient3-Porta/Control** | **Patient3-Hepa/Control** | **Peptide** |
|  | 480 | **457.21** | **912.40** | **912.53** | **-0.13** | **0** | **20** | **0.8** | **2** | **---** | **---** | **---** | **---** | **---** | **---** | **K.FSISR.D** 482 487 490 492 494 500 |
|  | 1469 | **535.79** | **1069.57** | **1069.57** | **-0.00** | **0** | **5** | **22** | **2** | **---** | **---** | **---** | **---** | **---** | **---** | **R.DSLEFR.E** |
|  | 2439 | **604.82** | **1207.63** | **1207.81** | **-0.18** | **0** | **19** | **0.8** | **1** | **---** | **---** | **---** | **---** | **---** | **---** | **K.QLVLK.A** 2449 2450 2454 2455 |
|  | 2698 | **632.82** | **1263.62** | **1263.71** | **-0.09** | **0** | **41** | **0.003** | **1** | **1.379** | **2.112** | **0.717** | **1.467** | **0.919** | **0.903** | **K.ADLSGITGAR.N** 2695 2696 2697 |
|  | 2703 | **633.30** | **1264.59** | **1264.76** | **-0.17** | **0** | **15** | **1.5** | **1** | **---** | **---** | **---** | **---** | **---** | **---** | **R.FYLSK.K** 2704 |
|  | 2761 | **639.30** | **1276.59** | **1276.73** | **-0.14** | **0** | **46** | **0.0011** | **1** | **1.391** | **1.654** | **1.985** | **0.927** | **0.743** | **0.682** | **K.EQLSLLDR.F** 2764 2765 2766 2767 |
|  | 2970 | **655.85** | **1309.69** | **1309.84** | **-0.16** | **0** | **27** | **0.11** | **1** | **---** | **---** | **---** | **---** | **---** | **---** | **K.ITDLIK.D** 2973 2974 |
|  | 3033 | **659.84** | **1317.67** | **1317.74** | **-0.07** | **0** | **12** | **5.3** | **1** | **---** | **---** | **---** | **---** | **---** | **---** | **R.FTEDAK.R** 3032 3036 3038 |
|  | 4100 | **760.42** | **1518.82** | **1518.93** | **-0.10** | **0** | **63** | **3.3e-005** | **1** | **2.604** | **3.495** | **1.603** | **0.811** | **3.970** | **1.131** | **K.ITLLSALVETR.T** 4092 4093 4094 4096 4097 4098 4099 4101 4102 4103 4104 4105 4107 4108 4109 4110 4113 4116 4118 4119 4120 |
|  | 4704 | **835.45** | **1668.89** | **1668.99** | **-0.10** | **0** | **29** | **0.075** | **1** | **---** | **---** | **---** | **---** | **---** | **---** | **R.EIGELYLPK.F** 4699 4700 4701 4702 4703 4705 4706 4707 |
|  | 4907 | **568.33** | **1701.97** | **1702.04** | **-0.07** | **0** | **32** | **0.05** | **1** | **0.873** | **1.142** | **1.116** | **0.727** | **0.593** | **0.553** | **R.NLAVSQVVHK.A** 4904 4905 4908 4910 |
|  | 6155 | **635.67** | **1904.00** | **1904.19** | **-0.18** | **1** | **28** | **0.11** | **1** | **---** | **---** | **---** | **---** | **---** | **---** | **K.KLINDYVK.N** 6156 6157 6158 |
|  | 9514 | **608.06** | **2428.20** | **2428.35** | **-0.15** | **2** | **9** | **5.7** | **1** | **---** | **---** | **---** | **---** | **---** | **---** | **K.EQLSLLDRFTEDAKR.L** |
|  | 9995 | **834.05** | **2499.13** | **2499.27** | **-0.15** | **0** | **71** | **1.8e-006** | **1** | **1.533** | **0.909** | **1.952** | **1.047** | **1.028** | **1.044** | **R.LYGSEAFATDFQDSAAAK.K** 9996 9997 9999 10000 10001 10002 10003 10006 10007 10008 10010 10011 10012 10015 10016 10018 10020 10022 10024 10026 10027 10028 10029 10032 10033 10036 10037 10038 10039 10040 10041 10043 10049 10050 10051 10052 10053 10054 10057 10059 10060 10061 10062 10064 10065 10067 10068 10070 10215 | **839.42** | **2515.22** | **2515.36** | **-0.14** | **0** | **85** | **1.5e-007** | **1** | **1.073** | **1.155** | **0.787** | **0.616** | **0.535** | **0.480** | **K.AVLDVFEEGTEASAATAVK.I** 10203 10204 10205 10206 10207 10208 10209 10210 10211 10213 10214 10216 10217 10218 10219 10221 10222 10225 10226 10228 10229 10231 10232 10233 10236 10237 10238 10240 10241 10244 10245 10246 10247 10248 10251 10252 10253 10254 10255 10256 10259 10260 10261 10262 10263 10264 10266 10268 10904 | **664.83** | **2655.30** | **2655.38** | **-0.08** | **1** | **15** | **1.5** | **1** | **---** | **---** | **---** | **---** | **---** | **---** | **K.RLYGSEAFATDFQDSAAAK.K** 10901 10902 10903 10905 |
|  | 11083 | **902.10** | **2703.28** | **2703.41** | **-0.14** | **0** | **64** | **1.2e-005** | **1** | **0.796** | **0.862** | **0.898** | **0.543** | **0.250** | **0.572** | **K.DLDSQTMMVLVNYIFFK.A** 11084 11085 11087 11088 11089 11090 |
|  | 11637 | **709.11** | **2832.40** | **2832.53** | **-0.13** | **0** | **37** | **0.0088** | **1** | **###** | **###** | **###** | **###** | **###** | **###** | **R.GTHVDLGLASANVDFAFSLYK.Q** 11633 11635 11636 11638 11641 11645 11647 11648 11649 |
|  | 11972 | **968.85** | **2903.54** | **2903.57** | **-0.03** | **0** | **33** | **0.032** | **1** | **-0.022** | **1.936** | **1.091** | **0.968** | **0.280** | **0.388** | **R.DYNLNDILLQLGIEEAFTSK.A** 11953 11958 11961 11973 |
|  | 13217 | **825.65** | **3298.58** | **3298.77** | **-0.19** | **0** | **39** | **0.0041** | **1** | **0.664** | **0.594** | **0.864** | **0.540** | **0.541** | **0.521** | **R.FNRPFLMIIVPTDTQNIFFMSK.V** 13218 13219 |

  


---

|  |  |
| --- | --- |
| **8.** | P00450    **Mass:** 143199   **Score:** 1154   **Queries matched:** 75   **emPAI:** 0.43 |
|  | Ceruloplasmin OS=Homo sapiens GN=CP PE=1 SV=1 |

|  |  |  |  |  |  |
| --- | --- | --- | --- | --- | --- |
|  | **Quantitation:** | **Ratio** | **Weighted** | **N** | **SD(geo)** |
|  |  | **Patient1-Art/Control** | **1.140** | **35** | **1.294** |
|  |  | Patient1-Porta/Control | 1.164 | 36 | NN |
|  |  | **Patient1-Hepa/Control** | **1.153** | **35** | **1.471** |
|  |  | Patient3-Art/Control | 1.092 | 32 | 1.277 |
|  |  | Patient3-Porta/Control | 0.998 | 36 | NN |
|  |  | Patient3-Hepa/Control | 0.943 | 34 | NN |

|  |  |  |  |  |  |  |  |  |  |  |  |  |  |  |  |  |
| --- | --- | --- | --- | --- | --- | --- | --- | --- | --- | --- | --- | --- | --- | --- | --- | --- |
|  | **Query** | **Observed** | **Mr(expt)** | **Mr(calc)** | **Delta** | **Miss** | **Score** | **Expect** | **Rank** | **Patient1-Art/Control** | **Patient1-Porta/Control** | **Patient1-Hepa/Control** | **Patient3-Art/Control** | **Patient3-Porta/Control** | **Patient3-Hepa/Control** | **Peptide** |
|  | 564 | **468.76** | **935.50** | **935.55** | **-0.05** | **0** | **15** | **1.2** | **1** | **---** | **---** | **---** | **---** | **---** | **---** | **K.VFNPR.R** |
|  | 2572 | **617.33** | **1232.65** | **1232.59** | **0.05** | **0** | **15** | **1.8** | **1** | **---** | **---** | **---** | **---** | **---** | **---** | **K.YTVNQCR.R** |
|  | 3048 | **661.30** | **1320.59** | **1320.66** | **-0.07** | **0** | **24** | **0.13** | **1** | **---** | **---** | **---** | **---** | **---** | **---** | **R.QYTDSTFR.V** |
|  | 4777 | **418.57** | **1670.26** | **1670.06** | **0.19** | **0** | **2** | **8.7** | **1** | **---** | **---** | **---** | **---** | **---** | **---** | **K.VYVHLK.N** |
|  | 4785 | **838.44** | **1674.86** | **1674.96** | **-0.10** | **0** | **38** | **0.01** | **1** | **0.584** | **0.438** | **1.236** | **0.443** | **0.810** | **0.388** | **K.GAYPLSIEPIGVR.F** 4784 |
|  | 5468 | **596.98** | **1787.91** | **1788.01** | **-0.10** | **0** | **16** | **1.5** | **1** | **---** | **---** | **---** | **---** | **---** | **---** | **R.IYHSHIDAPK.D** |
|  | 5659 | **606.00** | **1814.98** | **1815.04** | **-0.06** | **0** | **57** | **0.00014** | **1** | **1.046** | **1.013** | **0.721** | **0.811** | **0.738** | **1.016** | **K.DIFTGLIGPMK.I** 5645 5646 5654 |
|  | 5686 | **912.42** | **1822.82** | **1822.94** | **-0.13** | **0** | **(39)** | **0.0039** | **1** | **1.345** | **1.153** | **0.834** | **0.678** | **0.993** | **0.838** | **K.ALYLQYTDETFR.T** 5687 5689 |
|  | 5978 | **623.67** | **1867.99** | **1868.02** | **-0.03** | **0** | **69** | **8.7e-006** | **1** | **1.298** | **0.867** | **1.566** | **0.844** | **0.537** | **0.621** | **K.DLYSGLIGPLIVCR.R** 5969 5970 5971 5974 5975 5977 5979 5981 5983 5984 |
|  | 6076 | **631.29** | **1890.84** | **1890.94** | **-0.09** | **1** | **13** | **1.6** | **1** | **---** | **---** | **---** | **---** | **---** | **---** | **R.RQSEDSTFYLGER.T** 6077 |
|  | 6549 | **660.68** | **1979.01** | **1979.17** | **-0.16** | **0** | **(31)** | **0.045** | **1** | **---** | **---** | **---** | **---** | **---** | **---** | **K.GAYPLSIEPIGVR.F** |
|  | 7035 | **689.72** | **2066.13** | **2066.21** | **-0.08** | **0** | **76** | **1.8e-006** | **1** | **0.886** | **1.636** | **1.294** | **1.265** | **1.280** | **0.967** | **K.DIASGLIGPLIICK.K** 7022 7023 7024 7025 7026 7028 7029 7030 7032 7033 7034 7036 7037 7039 7040 7041 7042 7043 |
|  | 7049 | **689.99** | **2066.95** | **2067.10** | **-0.14** | **0** | **43** | **0.0017** | **1** | **0.747** | **0.790** | **0.247** | **1.830** | **1.101** | **1.505** | **K.EVGPTNADPVCLAK.M** 7051 7054 7055 7056 |
|  | 7573 | **710.03** | **2127.07** | **2127.15** | **-0.07** | **0** | **42** | **0.0039** | **1** | **---** | **---** | **---** | **---** | **---** | **---** | **K.ALYLQYTDETFR.T** 7565 7569 7577 |
|  | 9831 | **620.54** | **2478.14** | **2478.34** | **-0.20** | **1** | **23** | **0.13** | **1** | **---** | **---** | **---** | **---** | **---** | **---** | **K.VNKDDEEFIESNK.M** |
|  | 11586 | **1409.23** | **2816.45** | **2816.29** | **0.16** | **0** | **6** | **13** | **1** | **---** | **---** | **---** | **---** | **---** | **---** | **K.MHSMNGFMYGNQPGLTMCK.G** |
|  | 11609 | **942.20** | **2823.59** | **2823.74** | **-0.15** | **0** | **41** | **0.0053** | **1** | **1.085** | **1.279** | **0.922** | **1.598** | **1.203** | **1.259** | **R.TTIEKPVWLGFLGPIIK.A** |
|  | 12264 | **997.17** | **2988.47** | **2988.45** | **0.02** | **0** | **60** | **4.7e-005** | **1** | **0.906** | **0.886** | **1.143** | **0.862** | **0.753** | **1.190** | **R.GVYSSDVFDIFPGTYQTLEMFPR.T** 12252 12253 12254 12255 12256 12257 12258 12260 12262 12263 |
|  | 12725 | **1034.80** | **3101.37** | **3101.49** | **-0.12** | **0** | **13** | **0.73** | **1** | **---** | **---** | **---** | **---** | **---** | **---** | **R.SGAGTEDSACIPWAYYSTVDQVK.D** 12724 |
|  | 13213 | **824.14** | **3292.53** | **3292.66** | **-0.13** | **0** | **(15)** | **0.76** | **1** | **---** | **---** | **---** | **---** | **---** | **---** | **R.GVYSSDVFDIFPGTYQTLEMFPR.T** |
|  | 14615 | **1077.51** | **4306.01** | **4306.00** | **0.01** | **1** | **34** | **0.0071** | **1** | **1.158** | **1.056** | **1.493** | **1.125** | **1.251** | **0.862** | **R.ADDKVYPGEQYTYMLLATEEQSPGEGDGNCVTR.I** |
|  | 15363 | **1051.48** | **5252.35** | **5252.52** | **-0.18** | **2** | **3** | **3.2** | **1** | **---** | **---** | **---** | **---** | **---** | **---** | **K.VDKDNEDFQESNRMYSVNGYTFGSLPGLSMCAEDR.V** |

  


---

|  |  |
| --- | --- |
| **9.** | P02675    **Mass:** 67700    **Score:** 930    **Queries matched:** 130   **emPAI:** 1.48 |
|  | Fibrinogen beta chain OS=Homo sapiens GN=FGB PE=1 SV=2 |

|  |  |  |  |  |  |
| --- | --- | --- | --- | --- | --- |
|  | **Quantitation:** | **Ratio** | **Weighted** | **N** | **SD(geo)** |
|  |  | Patient1-Art/Control | 0.945 | 45 | 2.069 |
|  |  | Patient1-Porta/Control | 0.954 | 44 | 1.652 |
|  |  | Patient1-Hepa/Control | 0.982 | 45 | 2.331 |
|  |  | Patient3-Art/Control | 0.864 | 45 | NN |
|  |  | Patient3-Porta/Control | 0.892 | 45 | 1.830 |
|  |  | Patient3-Hepa/Control | 0.831 | 45 | NN |

|  |  |  |  |  |  |  |  |  |  |  |  |  |  |  |  |  |
| --- | --- | --- | --- | --- | --- | --- | --- | --- | --- | --- | --- | --- | --- | --- | --- | --- |
|  | **Query** | **Observed** | **Mr(expt)** | **Mr(calc)** | **Delta** | **Miss** | **Score** | **Expect** | **Rank** | **Patient1-Art/Control** | **Patient1-Porta/Control** | **Patient1-Hepa/Control** | **Patient3-Art/Control** | **Patient3-Porta/Control** | **Patient3-Hepa/Control** | **Peptide** |
|  | 1225 | **511.25** | **1020.48** | **1020.62** | **-0.15** | **0** | **27** | **0.1** | **2** | **---** | **---** | **---** | **---** | **---** | **---** | **K.ISQLTR.M** 1223 1224 1227 1228 1229 1230 1231 1232 1235 1236 1237 1238 |
|  | 1897 | **574.83** | **1147.64** | **1147.69** | **-0.05** | **0** | **48** | **0.00085** | **1** | **0.695** | **0.684** | **0.479** | **0.833** | **0.292** | **0.751** | **R.SILENLR.S** 1890 1892 1893 1895 1896 1898 1899 1900 |
|  | 2328 | **599.30** | **1196.59** | **1196.73** | **-0.15** | **0** | **26** | **0.16** | **1** | **---** | **---** | **---** | **---** | **---** | **---** | **K.AAATQK.K** 2329 2331 2332 2333 2334 2335 |
|  | 2415 | **603.79** | **1205.57** | **1205.58** | **-0.01** | **0** | **10** | **4.1** | **1** | **---** | **---** | **---** | **---** | **---** | **---** | **K.GSWYSMR.K** |
|  | 2590 | **621.27** | **1240.53** | **1240.61** | **-0.08** | **0** | **34** | **0.013** | **1** | **0.881** | **0.917** | **0.693** | **0.813** | **0.753** | **1.004** | **K.ECEEIIR.K** 2579 2580 2581 2582 2583 2584 2585 2586 2588 2589 2591 2592 2593 2594 2595 2596 2597 2598 2599 2600 2601 2602 |
|  | 2857 | **642.76** | **1283.51** | **1283.64** | **-0.13** | **0** | **55** | **4.4e-005** | **1** | **2.845** | **1.939** | **0.821** | **1.050** | **1.185** | **1.337** | **R.QDGSVDFGR.K** 2855 2856 2858 2859 2860 2861 2862 |
|  | 2893 | **649.31** | **1296.61** | **1296.77** | **-0.15** | **0** | **17** | **1.4** | **1** | **---** | **---** | **---** | **---** | **---** | **---** | **K.DLWQK.R** 2894 |
|  | 3108 | **668.79** | **1335.57** | **1335.76** | **-0.19** | **0** | **28** | **0.052** | **1** | **---** | **---** | **---** | **---** | **---** | **---** | **K.IRPFFPQQ.-** 3109 3110 3111 3112 3113 3114 3115 3116 3117 3118 |
|  | 3656 | **477.57** | **1429.68** | **1429.86** | **-0.18** | **0** | **2** | **31** | **4** | **---** | **---** | **---** | **---** | **---** | **---** | **R.GHRPLDK.K** |
|  | 3804 | **486.92** | **1457.75** | **1457.93** | **-0.19** | **1** | **1** | **66** | **1** | **---** | **---** | **---** | **---** | **---** | **---** | **K.GDKVK.A** |
|  | 3813 | **730.37** | **1458.73** | **1458.87** | **-0.14** | **0** | **13** | **2.7** | **1** | **---** | **---** | **---** | **---** | **---** | **---** | **K.YQISVNK.Y** 3811 3817 |
|  | 4033 | **504.23** | **1509.68** | **1509.79** | **-0.10** | **0** | **(8)** | **5.6** | **1** | **---** | **---** | **---** | **---** | **---** | **---** | **K.GSWYSMR.K** |
|  | 5215 | **583.64** | **1747.90** | **1748.04** | **-0.14** | **1** | **0** | **59** | **1** | **---** | **---** | **---** | **---** | **---** | **---** | **R.KWDPYK.Q** |
|  | 6199 | **639.64** | **1915.90** | **1916.02** | **-0.12** | **0** | **36** | **0.011** | **1** | **0.775** | **0.677** | **0.708** | **0.775** | **0.477** | **1.391** | **K.QGFGNVATNTDGK.N** 6198 6203 |
|  | 7625 | **715.33** | **2142.96** | **2143.13** | **-0.17** | **0** | **85** | **8.2e-008** | **1** | **0.688** | **0.669** | **0.638** | **0.094** | **0.470** | **0.555** | **K.AHYGGFTVQNEANK.Y** 7626 7627 7628 |
|  | 8228 | **735.68** | **2204.01** | **2204.13** | **-0.11** | **0** | **56** | **7.3e-005** | **1** | **0.635** | **1.078** | **0.650** | **0.683** | **1.066** | **0.555** | **R.TPCTVSCNIPVVSGK.E** 8224 8225 8226 8227 8229 8230 8231 8232 8233 8234 8235 8236 8239 |
|  | 8546 | **752.38** | **2254.12** | **2254.20** | **-0.08** | **0** | **37** | **0.0099** | **1** | **1.102** | **1.189** | **1.381** | **1.207** | **1.278** | **1.255** | **R.EEAPSLRPAPPPISGGGYR.A** 8544 |
|  | 8711 | **765.01** | **2292.01** | **2292.11** | **-0.11** | **0** | **39** | **0.0024** | **1** | **0.991** | **0.859** | **4.370** | **1.868** | **1.207** | **1.864** | **R.YYWGGQYTWDMAK.H** |
|  | 9039 | **778.07** | **2331.20** | **2331.20** | **0.00** | **0** | **31** | **0.045** | **1** | **0.904** | **0.835** | **0.944** | **0.684** | **0.776** | **0.805** | **R.MGPTELLIEMEDWK.G** 9032 9033 9034 9035 9038 |
|  | 9192 | **793.01** | **2376.01** | **2376.19** | **-0.18** | **0** | **53** | **5.7e-005** | **1** | **0.675** | **0.694** | **0.995** | **0.351** | **0.352** | **0.662** | **K.DNENVVNEYSSELEK.H** 9193 |
|  | 9197 | **795.00** | **2381.98** | **2382.16** | **-0.18** | **0** | **43** | **0.00044** | **1** | **0.954** | **0.875** | **0.743** | **0.466** | **0.852** | **0.653** | **K.NYCGLPGEYWLGNDK.I** 9196 9199 9200 9202 9203 9204 9206 |
|  | 9326 | **603.54** | **2410.13** | **2410.30** | **-0.18** | **1** | **87** | **6.9e-008** | **1** | **1.680** | **1.202** | **2.223** | **1.369** | **1.061** | **0.922** | **K.REEAPSLRPAPPPISGGGYR.A** 9330 9331 |
|  | 10479 | **640.58** | **2558.30** | **2558.41** | **-0.10** | **0** | **(7)** | **10** | **1** | **---** | **---** | **---** | **---** | **---** | **---** | **R.EEAPSLRPAPPPISGGGYR.A** |
|  | 11095 | **543.88** | **2714.35** | **2714.51** | **-0.16** | **1** | **(30)** | **0.045** | **1** | **---** | **---** | **---** | **---** | **---** | **---** | **K.REEAPSLRPAPPPISGGGYR.A** |
|  | 11152 | **684.59** | **2734.33** | **2734.49** | **-0.15** | **0** | **28** | **0.065** | **1** | **---** | **---** | **---** | **---** | **---** | **---** | **K.HQLYIDETVNSNIPTNLR.V** |
|  | 12016 | **730.85** | **2919.36** | **2919.55** | **-0.19** | **1** | **27** | **0.053** | **1** | **0.905** | **1.396** | **1.252** | **1.286** | **1.165** | **0.980** | **R.MGPTELLIEMEDWKGDK.V** 12017 |
|  | 14905 | **932.65** | **4658.19** | **4658.32** | **-0.13** | **1** | **7** | **3.4** | **1** | **---** | **---** | **---** | **---** | **---** | **---** | **R.KAPDAGGCLHADPDLGVLCPTGCQLQEALLQQERPIR.N** |

  


---

|  |  |
| --- | --- |
| **10.** | P02679    **Mass:** 62632    **Score:** 637    **Queries matched:** 132   **emPAI:** 1.99 |
|  | Fibrinogen gamma chain OS=Homo sapiens GN=FGG PE=1 SV=3 |

|  |  |  |  |  |  |
| --- | --- | --- | --- | --- | --- |
|  | **Quantitation:** | **Ratio** | **Weighted** | **N** | **SD(geo)** |
|  |  | Patient1-Art/Control | 1.011 | 26 | NN |
|  |  | Patient1-Porta/Control | 1.008 | 25 | 1.256 |
|  |  | Patient1-Hepa/Control | 0.893 | 26 | NN |
|  |  | **Patient3-Art/Control** | **0.822** | **25** | **1.274** |
|  |  | Patient3-Porta/Control | 0.917 | 26 | NN |
|  |  | **Patient3-Hepa/Control** | **0.833** | **25** | **1.250** |

|  |  |  |  |  |  |  |  |  |  |  |  |  |  |  |  |  |
| --- | --- | --- | --- | --- | --- | --- | --- | --- | --- | --- | --- | --- | --- | --- | --- | --- |
|  | **Query** | **Observed** | **Mr(expt)** | **Mr(calc)** | **Delta** | **Miss** | **Score** | **Expect** | **Rank** | **Patient1-Art/Control** | **Patient1-Porta/Control** | **Patient1-Hepa/Control** | **Patient3-Art/Control** | **Patient3-Porta/Control** | **Patient3-Hepa/Control** | **Peptide** |
|  | 1422 | **532.27** | **1062.52** | **1062.65** | **-0.13** | **0** | **19** | **0.51** | **2** | **---** | **---** | **---** | **---** | **---** | **---** | **K.IIPFNR.L** 1420 1421 1423 1424 1425 |
|  | 2079 | **586.31** | **1170.61** | **1170.71** | **-0.10** | **0** | **11** | **6.2** | **1** | **---** | **---** | **---** | **---** | **---** | **---** | **K.TSEVK.Q** |
|  | 2280 | **597.87** | **1193.73** | **1193.80** | **-0.07** | **0** | **19** | **0.74** | **1** | **---** | **---** | **---** | **---** | **---** | **---** | **K.IVNLK.E** 2270 2272 2273 2274 2275 2276 2277 2278 2279 2281 2282 2284 2286 2287 2288 2290 2291 2292 2293 2294 2295 2297 |
|  | 3125 | **669.81** | **1337.60** | **1337.73** | **-0.12** | **0** | **1** | **27** | **2** | **---** | **---** | **---** | **---** | **---** | **---** | **R.WYSMK.K** |
|  | 3605 | **711.42** | **1420.83** | **1420.73** | **0.10** | **0** | **19** | **0.91** | **1** | **---** | **---** | **---** | **---** | **---** | **---** | **R.VELEDWNGR.T** 3588 |
|  | 3870 | **738.72** | **1475.43** | **1475.62** | **-0.19** | **0** | **41** | **7.2e-005** | **1** | **0.981** | **0.872** | **0.940** | **0.731** | **0.794** | **0.689** | **R.DNCCILDER.F** 3871 3873 3875 |
|  | 3923 | **744.87** | **1487.72** | **1487.84** | **-0.12** | **0** | **14** | **2** | **1** | **---** | **---** | **---** | **---** | **---** | **---** | **R.LDGSVDFK.K** 3922 3924 |
|  | 4270 | **780.83** | **1559.64** | **1559.79** | **-0.15** | **0** | **31** | **0.011** | **1** | **0.771** | **0.922** | **0.779** | **0.790** | **0.639** | **0.681** | **K.DCQDIANK.G** 4269 4271 4272 4275 4280 4281 |
|  | 4592 | **548.25** | **1641.74** | **1641.93** | **-0.19** | **1** | **34** | **0.013** | **1** | **1.071** | **0.906** | **0.833** | **1.102** | **0.916** | **0.895** | **K.VGPEADKYR.L** 4593 4594 |
|  | 4600 | **548.93** | **1643.77** | **1643.95** | **-0.17** | **1** | **20** | **0.47** | **1** | **---** | **---** | **---** | **---** | **---** | **---** | **K.RLDGSVDFK.K** 4603 4604 4605 4606 4607 4608 4614 4619 4621 |
|  | 5167 | **581.62** | **1741.83** | **1741.92** | **-0.09** | **0** | **(16)** | **1.2** | **1** | **---** | **---** | **---** | **---** | **---** | **---** | **R.TSTADYAMFK.V** 5164 5168 |
|  | 5237 | **586.00** | **1754.99** | **1755.14** | **-0.15** | **1** | **15** | **2.1** | **1** | **---** | **---** | **---** | **---** | **---** | **---** | **K.IVNLKEK.V** 5236 5238 |
|  | 5250 | **586.93** | **1757.77** | **1757.91** | **-0.14** | **0** | **43** | **0.001** | **1** | **0.689** | **0.527** | **0.851** | **0.460** | **0.442** | **0.486** | **R.TSTADYAMFK.V** 5247 5248 5253 5257 5261 5262 |
|  | 5729 | **612.33** | **1833.96** | **1834.04** | **-0.08** | **0** | **29** | **0.081** | **1** | **---** | **---** | **---** | **---** | **---** | **---** | **K.DTVQIHDITGK.D** |
|  | 6078 | **631.33** | **1890.98** | **1891.14** | **-0.16** | **1** | **10** | **6.7** | **1** | **---** | **---** | **---** | **---** | **---** | **---** | **K.KNWIQYK.E** 6079 |
|  | 6241 | **641.00** | **1919.99** | **1920.14** | **-0.16** | **1** | **22** | **0.45** | **1** | **---** | **---** | **---** | **---** | **---** | **---** | **R.LDGSVDFKK.N** 6240 6243 |
|  | 6337 | **645.33** | **1932.97** | **1933.15** | **-0.18** | **1** | **(5)** | **17** | **1** | **---** | **---** | **---** | **---** | **---** | **---** | **R.KMLEEIMK.Y** 6338 |
|  | 6422 | **650.69** | **1949.04** | **1949.15** | **-0.11** | **1** | **(12)** | **4.4** | **1** | **---** | **---** | **---** | **---** | **---** | **---** | **R.KMLEEIMK.Y** |
|  | 6513 | **656.01** | **1965.00** | **1965.14** | **-0.14** | **1** | **19** | **0.8** | **1** | **---** | **---** | **---** | **---** | **---** | **---** | **R.KMLEEIMK.Y** 6511 6512 |
|  | 6580 | **663.02** | **1986.04** | **1986.16** | **-0.12** | **0** | **78** | **1e-006** | **1** | **0.942** | **1.014** | **1.032** | **0.539** | **0.974** | **0.784** | **K.IHLISTQSAIPYALR.V** 6577 6578 6579 6581 6582 6583 6584 6585 6586 6587 6588 |
|  | 7205 | **525.76** | **2099.01** | **2099.15** | **-0.14** | **0** | **3** | **21** | **1** | **---** | **---** | **---** | **---** | **---** | **---** | **K.YEASILTHDSSIR.Y** |
|  | 7507 | **707.99** | **2120.94** | **2121.13** | **-0.19** | **0** | **44** | **0.00093** | **1** | **0.909** | **0.841** | **0.781** | **0.964** | **0.865** | **0.675** | **R.YLQEIYNSNNQK.I** 7508 |
|  | 7633 | **716.29** | **2145.85** | **2146.05** | **-0.20** | **0** | **56** | **1.4e-005** | **1** | **0.888** | **0.641** | **0.758** | **0.438** | **0.306** | **0.654** | **K.VAQLEAQCQEPCK.D** 7634 7636 7637 |
|  | 7860 | **718.70** | **2153.07** | **2153.22** | **-0.15** | **0** | **41** | **0.0038** | **1** | **0.939** | **0.968** | **0.765** | **0.974** | **0.972** | **0.715** | **R.LTIGEGQQHHLGGAK.Q** 7858 7859 |
|  | 8244 | **736.08** | **2205.22** | **2205.37** | **-0.14** | **0** | **26** | **0.18** | **1** | **---** | **---** | **---** | **---** | **---** | **---** | **K.QSGLYFIKPLK.A** 8242 8243 8247 8248 8249 8250 |
|  | 8700 | **573.56** | **2290.23** | **2290.36** | **-0.14** | **0** | **(34)** | **0.025** | **1** | **---** | **---** | **---** | **---** | **---** | **---** | **K.IHLISTQSAIPYALR.V** 8701 8703 |
|  | 12235 | **744.41** | **2973.62** | **2973.58** | **0.04** | **1** | **6** | **16** | **2** | **---** | **---** | **---** | **---** | **---** | **---** | **K.MLEEIMKYEASILTHDSSIR.Y** 12205 12214 |
|  | 12408 | **1001.76** | **3002.27** | **3002.41** | **-0.15** | **0** | **57** | **1.5e-005** | **1** | **0.843** | **0.814** | **0.935** | **1.014** | **0.883** | **0.881** | **R.FGSYCPTTCGIADFLSTYQTK.V** 12403 12404 12406 12409 12410 12411 12416 12417 |
|  | 13236 | **827.62** | **3306.45** | **3306.62** | **-0.17** | **0** | **(22)** | **0.074** | **1** | **---** | **---** | **---** | **---** | **---** | **---** | **R.FGSYCPTTCGIADFLSTYQTK.V** |
|  | 13925 | **732.56** | **3657.76** | **3657.88** | **-0.12** | **1** | **9** | **3.9** | **1** | **---** | **---** | **---** | **---** | **---** | **---** | **K.VAQLEAQCQEPCKDTVQIHDITGK.D** 13924 |

  


---

|  |  |
| --- | --- |
| **11.** | P01871    **Mass:** 56824    **Score:** 530    **Queries matched:** 51   **emPAI:** 0.89 |
|  | Ig mu chain C region OS=Homo sapiens GN=IGHM PE=1 SV=3 |

|  |  |  |  |  |  |
| --- | --- | --- | --- | --- | --- |
|  | **Quantitation:** | **Ratio** | **Weighted** | **N** | **SD(geo)** |
|  |  | **Patient1-Art/Control** | **1.400** | **17** | **1.893** |
|  |  | **Patient1-Porta/Control** | **1.394** | **17** | **1.696** |
|  |  | **Patient1-Hepa/Control** | **1.362** | **17** | **1.482** |
|  |  | Patient3-Art/Control | 0.749 | 17 | 1.672 |
|  |  | Patient3-Porta/Control | 0.776 | 17 | 1.636 |
|  |  | Patient3-Hepa/Control | 0.856 | 16 | NN |

|  |  |  |  |  |  |  |  |  |  |  |  |  |  |  |  |  |
| --- | --- | --- | --- | --- | --- | --- | --- | --- | --- | --- | --- | --- | --- | --- | --- | --- |
|  | **Query** | **Observed** | **Mr(expt)** | **Mr(calc)** | **Delta** | **Miss** | **Score** | **Expect** | **Rank** | **Patient1-Art/Control** | **Patient1-Porta/Control** | **Patient1-Hepa/Control** | **Patient3-Art/Control** | **Patient3-Porta/Control** | **Patient3-Hepa/Control** | **Peptide** |
|  | 1496 | **538.80** | **1075.59** | **1075.63** | **-0.04** | **0** | **26** | **0.14** | **2** | **---** | **---** | **---** | **---** | **---** | **---** | **R.EQLNLR.E** 1495 1497 1498 1500 1501 |
|  | 1511 | **540.30** | **1078.58** | **1078.64** | **-0.07** | **0** | **30** | **0.042** | **1** | **0.950** | **1.118** | **2.001** | **0.551** | **1.051** | **0.775** | **R.GFPSVLR.G** 1510 1514 1515 |
|  | 2409 | **602.84** | **1203.66** | **1203.73** | **-0.07** | **0** | **35** | **0.016** | **1** | **0.863** | **1.742** | **2.970** | **1.029** | **0.818** | **0.608** | **K.VSVFVPPR.D** 2410 2412 |
|  | 3681 | **479.91** | **1436.70** | **1436.89** | **-0.19** | **0** | **9** | **6.3** | **1** | **---** | **---** | **---** | **---** | **---** | **---** | **K.QTISRPK.G** |
|  | 3830 | **732.39** | **1462.77** | **1462.86** | **-0.09** | **0** | **17** | **1.5** | **1** | **---** | **---** | **---** | **---** | **---** | **---** | **R.GQPLSPEK.Y** |
|  | 6242 | **641.01** | **1920.00** | **1919.97** | **0.03** | **0** | **16** | **1.8** | **1** | **---** | **---** | **---** | **---** | **---** | **---** | **K.YVTSAPMPEPQAPGR.Y** 6237 6239 |
|  | 6689 | **665.72** | **1994.14** | **1994.24** | **-0.10** | **0** | **53** | **0.00037** | **1** | **1.440** | **1.495** | **1.109** | **0.700** | **0.437** | **0.482** | **K.NVPLPVIAELPPK.V** 6629 6690 6691 6693 6694 6695 6696 |
|  | 7077 | **520.27** | **2077.04** | **2077.21** | **-0.17** | **0** | **41** | **0.005** | **1** | **1.590** | **1.855** | **1.391** | **1.163** | **1.110** | **0.722** | **K.GVALHRPDVYLLPPAR.E** 7078 |
|  | 8479 | **742.76** | **2225.24** | **2225.21** | **0.03** | **0** | **62** | **4.2e-005** | **1** | **2.188** | **2.080** | **1.401** | **0.851** | **1.189** | **1.166** | **K.QVGSGVTTDQVQAEAK.E** 8471 8473 8474 8475 8476 8477 8478 |
|  | 8518 | **749.41** | **2245.20** | **2245.33** | **-0.14** | **0** | **49** | **0.00085** | **1** | **0.810** | **0.717** | **1.217** | **0.491** | **0.421** | **0.694** | **R.VFAIPPSFASIFLTK.S** 8516 8517 8519 8520 8521 8522 8524 8525 8527 8528 |
|  | 8833 | **772.04** | **2313.08** | **2313.23** | **-0.15** | **0** | **30** | **0.03** | **1** | **1.512** | **1.492** | **1.204** | **0.626** | **0.914** | **1.080** | **R.FTCTVTHTDLPSPLK.Q** 8834 8838 8839 |

  


---

|  |  |
| --- | --- |
| **12.** | P08603    **Mass:** 167416   **Score:** 515    **Queries matched:** 36   **emPAI:** 0.16 |
|  | Complement factor H OS=Homo sapiens GN=CFH PE=1 SV=4 |

|  |  |  |  |  |  |
| --- | --- | --- | --- | --- | --- |
|  | **Quantitation:** | **Ratio** | **Weighted** | **N** | **SD(geo)** |
|  |  | Patient1-Art/Control | 0.992 | 14 | 1.316 |
|  |  | Patient1-Porta/Control | 0.949 | 16 | 1.665 |
|  |  | Patient1-Hepa/Control | 0.906 | 15 | 1.651 |
|  |  | Patient3-Art/Control | 0.896 | 16 | 2.057 |
|  |  | Patient3-Porta/Control | 1.021 | 16 | NN |
|  |  | Patient3-Hepa/Control | 0.914 | 16 | 2.059 |

|  |  |  |  |  |  |  |  |  |  |  |  |  |  |  |  |  |
| --- | --- | --- | --- | --- | --- | --- | --- | --- | --- | --- | --- | --- | --- | --- | --- | --- |
|  | **Query** | **Observed** | **Mr(expt)** | **Mr(calc)** | **Delta** | **Miss** | **Score** | **Expect** | **Rank** | **Patient1-Art/Control** | **Patient1-Porta/Control** | **Patient1-Hepa/Control** | **Patient3-Art/Control** | **Patient3-Porta/Control** | **Patient3-Hepa/Control** | **Peptide** |
|  | 3274 | **456.55** | **1366.64** | **1366.79** | **-0.15** | **0** | **22** | **0.28** | **1** | **---** | **---** | **---** | **---** | **---** | **---** | **K.IDVHLVPDR.K** 3275 3279 3287 3288 |
|  | 3307 | **686.78** | **1371.55** | **1371.74** | **-0.19** | **0** | **4** | **6** | **2** | **---** | **---** | **---** | **---** | **---** | **---** | **R.ECELPK.I** |
|  | 3614 | **475.21** | **1422.61** | **1422.69** | **-0.08** | **0** | **14** | **1.2** | **1** | **---** | **---** | **---** | **---** | **---** | **---** | **K.CLHPCVISR.E** |
|  | 5161 | **581.42** | **1741.24** | **1741.05** | **0.19** | **0** | **32** | **0.016** | **1** | **---** | **---** | **---** | **---** | **---** | **---** | **R.RPYFPVAVGK.Y** 5157 5158 5159 |
|  | 5445 | **596.28** | **1785.81** | **1785.90** | **-0.09** | **0** | **12** | **1.9** | **1** | **---** | **---** | **---** | **---** | **---** | **---** | **K.LSYTCEGGFR.I** |
|  | 5885 | **619.65** | **1855.93** | **1856.01** | **-0.08** | **0** | **11** | **4.7** | **1** | **---** | **---** | **---** | **---** | **---** | **---** | **R.WQSIPLCVEK.I** 5886 |
|  | 6733 | **668.70** | **2003.07** | **2003.19** | **-0.12** | **0** | **46** | **0.0018** | **1** | **0.913** | **1.115** | **0.749** | **0.743** | **0.841** | **0.749** | **K.SSNLIILEEHLK.N** 6734 |
|  | 7086 | **693.67** | **2077.99** | **2078.08** | **-0.09** | **0** | **73** | **2.2e-006** | **1** | **0.825** | **0.846** | **0.715** | **1.003** | **1.206** | **0.717** | **K.CFEGFGIDGPAIAK.C** 7080 7081 7083 7084 7085 7087 7088 7089 7090 7091 7092 7093 7094 |
|  | 9272 | **600.79** | **2399.14** | **2399.25** | **-0.11** | **0** | **15** | **1.3** | **1** | **---** | **---** | **---** | **---** | **---** | **---** | **R.CTLKPCDYPDIK.H** |
|  | 10828 | **874.73** | **2621.17** | **2621.30** | **-0.13** | **0** | **36** | **0.0043** | **1** | **1.079** | **0.620** | **0.479** | **0.670** | **0.704** | **1.058** | **K.TDCLSLPSFENAIPMGEK.K** 10826 10827 |
|  | 11328 | **691.80** | **2763.15** | **2763.29** | **-0.14** | **0** | **47** | **0.0001** | **1** | **1.108** | **1.124** | **1.009** | **1.535** | **1.359** | **1.406** | **R.GDAVCTESGWRPLPSCEEK.S** |
|  | 12003 | **728.85** | **2911.36** | **2911.50** | **-0.14** | **0** | **23** | **0.15** | **1** | **---** | **---** | **---** | **---** | **---** | **---** | **R.SITCIHGVWTQLPQCVAIDK.L** |

  


---

|  |  |
| --- | --- |
| **13.** | P04217    **Mass:** 58349    **Score:** 498    **Queries matched:** 128   **emPAI:** 1.23 |
|  | Alpha-1B-glycoprotein OS=Homo sapiens GN=A1BG PE=1 SV=3 |

|  |  |  |  |  |  |
| --- | --- | --- | --- | --- | --- |
|  | **Quantitation:** | **Ratio** | **Weighted** | **N** | **SD(geo)** |
|  |  | Patient1-Art/Control | 1.095 | 26 | NN |
|  |  | **Patient1-Porta/Control** | **1.116** | **25** | **1.357** |
|  |  | **Patient1-Hepa/Control** | **1.297** | **24** | **1.405** |
|  |  | Patient3-Art/Control | 1.330 | 25 | NN |
|  |  | **Patient3-Porta/Control** | **1.324** | **25** | **1.165** |
|  |  | **Patient3-Hepa/Control** | **1.127** | **26** | **1.188** |

|  |  |  |  |  |  |  |  |  |  |  |  |  |  |  |  |  |
| --- | --- | --- | --- | --- | --- | --- | --- | --- | --- | --- | --- | --- | --- | --- | --- | --- |
|  | **Query** | **Observed** | **Mr(expt)** | **Mr(calc)** | **Delta** | **Miss** | **Score** | **Expect** | **Rank** | **Patient1-Art/Control** | **Patient1-Porta/Control** | **Patient1-Hepa/Control** | **Patient3-Art/Control** | **Patient3-Porta/Control** | **Patient3-Hepa/Control** | **Peptide** |
|  | 342 | **439.25** | **876.48** | **876.53** | **-0.05** | **0** | **20** | **0.53** | **1** | **---** | **---** | **---** | **---** | **---** | **---** | **R.DAVLR.C** 340 343 344 347 |
|  | 463 | **455.24** | **908.47** | **908.58** | **-0.10** | **0** | **19** | **0.64** | **1** | **---** | **---** | **---** | **---** | **---** | **---** | **R.FALVR.E** 461 462 464 468 469 471 472 474 477 |
|  | 1025 | **500.72** | **999.43** | **999.51** | **-0.09** | **0** | **25** | **0.14** | **1** | **---** | **---** | **---** | **---** | **---** | **---** | **K.TTAVCR.G** 1027 1028 1029 1032 1035 1036 1038 |
|  | 1262 | **515.79** | **1029.56** | **1029.65** | **-0.09** | **0** | **38** | **0.0077** | **1** | **1.277** | **0.704** | **2.445** | **2.753** | **1.140** | **0.997** | **K.ELLVPR.S** 1259 1260 1263 1264 1265 1266 1267 1270 1271 |
|  | 1396 | **527.25** | **1052.48** | **1052.54** | **-0.06** | **0** | **7** | **6.8** | **2** | **---** | **---** | **---** | **---** | **---** | **---** | **R.SSTSPDR.I** |
|  | 1682 | **555.31** | **1108.60** | **1108.69** | **-0.09** | **0** | **41** | **0.005** | **1** | **0.616** | **1.187** | **2.203** | **1.041** | **1.493** | **1.399** | **R.GVTFLLR.R** 1673 1676 1680 1681 1685 1687 1688 1690 1691 1692 1695 1696 1701 |
|  | 1868 | **571.25** | **1140.49** | **1140.69** | **-0.20** | **2** | **1** | **30** | **4** | **---** | **---** | **---** | **---** | **---** | **---** | **R.GGRRVHR.F** |
|  | 2774 | **640.31** | **1278.61** | **1278.67** | **-0.07** | **0** | **25** | **0.14** | **1** | **---** | **---** | **---** | **---** | **---** | **---** | **R.CLAPLEGAR.F** 2773 2776 2777 2778 2779 2780 2781 2784 2786 2790 2794 |
|  | 3896 | **739.88** | **1477.74** | **1477.93** | **-0.20** | **0** | **37** | **0.0096** | **1** | **0.997** | **0.965** | **0.910** | **1.014** | **1.236** | **0.998** | **K.LLELTGPK.S** 3898 3899 3900 3901 3902 3903 3904 |
|  | 4788 | **559.58** | **1675.70** | **1675.89** | **-0.19** | **0** | **65** | **5.5e-006** | **1** | **1.232** | **1.056** | **1.780** | **1.083** | **1.193** | **0.920** | **K.HQFLLTGDTQGR.Y** 4789 |
|  | 5820 | **615.99** | **1844.94** | **1845.05** | **-0.11** | **0** | **32** | **0.039** | **1** | **0.716** | **1.643** | **1.782** | **2.013** | **1.298** | **1.544** | **R.LETPDFQLFK.N** 5818 5819 5821 5823 5825 |
|  | 6372 | **969.93** | **1937.84** | **1937.99** | **-0.15** | **0** | **42** | **0.0011** | **1** | **0.917** | **0.904** | **1.136** | **1.468** | **1.687** | **1.210** | **R.CEGPIPDVTFELLR.E** 6368 6369 6370 6371 6373 6375 6376 6378 6379 6381 6382 6384 6386 6387 6388 6389 6395 6397 6399 |
|  | 6819 | **507.75** | **2026.98** | **2027.16** | **-0.17** | **0** | **20** | **0.49** | **1** | **---** | **---** | **---** | **---** | **---** | **---** | **R.LELHVDGPPPRPQLR.A** 6820 6821 6822 6823 6824 6828 6829 |
|  | 7901 | **723.69** | **2168.06** | **2168.16** | **-0.11** | **0** | **40** | **0.0044** | **1** | **1.139** | **3.366** | **-0.292** | **0.257** | **1.936** | **2.034** | **K.VTLTCVAPLSGVDFQLR.R** 7899 7900 7903 7904 7905 7907 7909 7910 7911 7913 |
|  | 8652 | 756.08 | 2265.22 | 2265.20 | 0.01 | 2 | 2 | 42 | 2 | --- | --- | --- | --- | --- | --- | R.CLAPLEGARFALVREDR.G 8651 |
|  | 11365 | **925.82** | **2774.44** | **2774.57** | **-0.13** | **0** | **38** | **0.01** | **1** | **---** | **---** | **---** | **---** | **---** | **---** | **K.SLPAPWLSMAPVSWITPGLK.T** |
|  | 11963 | **726.87** | **2903.45** | **2903.59** | **-0.13** | **0** | **53** | **0.00026** | **1** | **---** | **---** | **---** | **---** | **---** | **---** | **R.TPGAAANLELIFVGPQHAGNYR.C** 11957 11959 11960 11962 11967 11969 11970 11971 |

  


---

|  |  |
| --- | --- |
| **14.** | P05155    **Mass:** 64430    **Score:** 491    **Queries matched:** 49   **emPAI:** 0.75 |
|  | Plasma protease C1 inhibitor OS=Homo sapiens GN=SERPING1 PE=1 SV=2 |

|  |  |  |  |  |  |
| --- | --- | --- | --- | --- | --- |
|  | **Quantitation:** | **Ratio** | **Weighted** | **N** | **SD(geo)** |
|  |  | Patient1-Art/Control | 0.996 | 15 | 1.352 |
|  |  | **Patient1-Porta/Control** | **1.123** | **15** | **1.371** |
|  |  | Patient1-Hepa/Control | 0.988 | 14 | 1.320 |
|  |  | Patient3-Art/Control | 1.023 | 15 | NN |
|  |  | Patient3-Porta/Control | 1.136 | 13 | 1.240 |
|  |  | **Patient3-Hepa/Control** | **0.854** | **15** | **1.217** |

|  |  |  |  |  |  |  |  |  |  |  |  |  |  |  |  |  |
| --- | --- | --- | --- | --- | --- | --- | --- | --- | --- | --- | --- | --- | --- | --- | --- | --- |
|  | **Query** | **Observed** | **Mr(expt)** | **Mr(calc)** | **Delta** | **Miss** | **Score** | **Expect** | **Rank** | **Patient1-Art/Control** | **Patient1-Porta/Control** | **Patient1-Hepa/Control** | **Patient3-Art/Control** | **Patient3-Porta/Control** | **Patient3-Hepa/Control** | **Peptide** |
|  | 2494 | **607.81** | **1213.61** | **1213.66** | **-0.05** | **0** | **28** | **0.11** | **1** | **---** | **---** | **---** | **---** | **---** | **---** | **R.TLYSSSPR.V** 2495 2496 |
|  | 3027 | **658.90** | **1315.78** | **1315.76** | **0.02** | **0** | **9** | **20** | **1** | **---** | **---** | **---** | **---** | **---** | **---** | **K.TTFDPK.K** |
|  | 3531 | **707.83** | **1413.64** | **1413.79** | **-0.15** | **0** | **2** | **24** | **6** | **---** | **---** | **---** | **---** | **---** | **---** | **K.VPMMNSK.K** |
|  | 3584 | **710.88** | **1419.75** | **1419.79** | **-0.04** | **0** | **22** | **0.27** | **1** | **---** | **---** | **---** | **---** | **---** | **---** | **R.LLDSLPSDTR.L** 3582 |
|  | 3622 | **713.92** | **1425.83** | **1425.90** | **-0.07** | **0** | **4** | **29** | **2** | **---** | **---** | **---** | **---** | **---** | **---** | **K.VATTVISK.M** |
|  | 3931 | **745.38** | **1488.75** | **1488.90** | **-0.14** | **0** | **22** | **0.37** | **1** | **---** | **---** | **---** | **---** | **---** | **---** | **K.FQPTLLTLPR.I** 3930 3936 3937 |
|  | 4248 | **520.56** | **1558.66** | **1558.84** | **-0.18** | **0** | **26** | **0.064** | **1** | **---** | **---** | **---** | **---** | **---** | **---** | **R.MEPFHFK.N** 4249 4253 4267 |
|  | 5634 | **605.95** | **1814.83** | **1814.96** | **-0.14** | **0** | **19** | **0.44** | **1** | **---** | **---** | **---** | **---** | **---** | **---** | **K.DFTCVHQALK.G** 5636 5643 |
|  | 5992 | **936.97** | **1871.93** | **1872.08** | **-0.15** | **0** | **51** | **0.00042** | **1** | **1.241** | **0.770** | **1.010** | **1.047** | **0.585** | **1.249** | **K.TNLESILSYPK.D** 5991 6005 6006 |
|  | 6288 | **642.72** | **1925.15** | **1925.22** | **-0.07** | **0** | **61** | **4.9e-005** | **1** | **1.105** | **1.457** | **0.686** | **1.412** | **1.111** | **0.768** | **R.LVLLNAIYLSAK.W** 6266 6267 6268 6270 6271 6272 6273 6275 6277 6278 6279 6285 6286 6287 6289 6295 6297 |
|  | 6699 | **499.77** | **1995.04** | **1995.14** | **-0.10** | **0** | **10** | **5.9** | **1** | **---** | **---** | **---** | **---** | **---** | **---** | **K.LYHAFSAMK.K** 6700 |
|  | 7523 | **708.36** | **2122.05** | **2122.11** | **-0.06** | **0** | **3** | **27** | **1** | **---** | **---** | **---** | **---** | **---** | **---** | **K.VTTSQDMLSIMEK.L** |
|  | 8420 | **740.02** | **2217.03** | **2217.18** | **-0.15** | **0** | **44** | **0.0013** | **1** | **0.589** | **1.267** | **0.971** | **0.974** | **0.308** | **0.657** | **R.LEDMEQALSPSVFK.A** 8421 |
|  | 9807 | **618.83** | **2471.29** | **2471.47** | **-0.18** | **1** | **43** | **0.0028** | **1** | **0.843** | **1.112** | **0.984** | **1.005** | **1.137** | **0.882** | **K.KYPVAHFIDQTLK.A** 9808 |
|  | 13784 | **1188.26** | **3561.77** | **3561.92** | **-0.15** | **0** | **10** | **4.4** | **1** | **---** | **---** | **---** | **---** | **---** | **---** | **K.VETNMAFSPFSIASLLTQVLLGAGENTK.T** |

  


---

|  |  |
| --- | --- |
| **15.** | P02766    **Mass:** 18707    **Score:** 469    **Queries matched:** 72   **emPAI:** 1.55 |
|  | Transthyretin OS=Homo sapiens GN=TTR PE=1 SV=1 |

|  |  |  |  |  |  |
| --- | --- | --- | --- | --- | --- |
|  | **Quantitation:** | **Ratio** | **Weighted** | **N** | **SD(geo)** |
|  |  | Patient1-Art/Control | 1.072 | 16 | NN |
|  |  | Patient1-Porta/Control | 1.001 | 19 | NN |
|  |  | **Patient1-Hepa/Control** | **1.221** | **17** | **1.683** |
|  |  | Patient3-Art/Control | 1.231 | 16 | NN |
|  |  | **Patient3-Porta/Control** | **1.227** | **18** | **1.535** |
|  |  | **Patient3-Hepa/Control** | **1.080** | **17** | **1.571** |

|  |  |  |  |  |  |  |  |  |  |  |  |  |  |  |  |  |
| --- | --- | --- | --- | --- | --- | --- | --- | --- | --- | --- | --- | --- | --- | --- | --- | --- |
|  | **Query** | **Observed** | **Mr(expt)** | **Mr(calc)** | **Delta** | **Miss** | **Score** | **Expect** | **Rank** | **Patient1-Art/Control** | **Patient1-Porta/Control** | **Patient1-Hepa/Control** | **Patient3-Art/Control** | **Patient3-Porta/Control** | **Patient3-Hepa/Control** | **Peptide** |
|  | 835 | **488.79** | **975.56** | **975.60** | **-0.04** | **0** | **29** | **0.041** | **1** | **1.500** | **1.042** | **1.632** | **1.507** | **1.237** | **1.959** | **K.VLDAVR.G** 823 824 825 826 827 828 829 830 831 832 834 836 837 838 841 |
|  | 3004 | **656.87** | **1311.72** | **1311.79** | **-0.07** | **0** | **15** | **2** | **2** | **---** | **---** | **---** | **---** | **---** | **---** | **K.VEIDTK.S** 3003 |
|  | 3201 | **680.85** | **1359.68** | **1359.75** | **-0.07** | **0** | **11** | **4.2** | **1** | **---** | **---** | **---** | **---** | **---** | **---** | **K.CPLMVK.V** 3199 3203 |
|  | 4710 | **557.61** | **1669.80** | **1669.96** | **-0.15** | **0** | **63** | **3e-005** | **1** | **0.852** | **0.911** | **1.170** | **1.242** | **1.164** | **1.053** | **R.GSPAINVAVHVFR.K** 4709 4711 4712 4714 4717 4724 4726 4729 4731 4732 4733 4734 4735 4736 4737 4739 4741 4743 4744 4745 4748 4751 4752 4756 4757 4759 4760 4763 4764 4765 4766 4767 4768 4770 4771 |
|  | 9543 | **609.55** | **2434.16** | **2434.33** | **-0.17** | **1** | **51** | **0.00028** | **1** | **1.307** | **0.980** | **1.791** | **1.284** | **1.438** | **1.558** | **R.KAADDTWEPFASGK.T** 9542 9554 |
|  | 12705 | **775.14** | **3096.54** | **3096.68** | **-0.15** | **1** | **61** | **3.1e-005** | **1** | **1.161** | **1.385** | **0.958** | **1.931** | **1.951** | **-0.075** | **R.YTIAALLSPYSYSTTAVVTNPKE.-** 12704 12706 12707 12708 12709 12711 12712 12713 |
|  | 13152 | **814.16** | **3252.60** | **3252.79** | **-0.18** | **2** | **41** | **0.0035** | **1** | **0.713** | **0.878** | **1.780** | **1.479** | **1.845** | **1.337** | **R.RYTIAALLSPYSYSTTAVVTNPKE.-** 13153 13154 |

  


---

|  |  |
| --- | --- |
| **16.** | P02790    **Mass:** 58934    **Score:** 430    **Queries matched:** 77   **emPAI:** 0.84 |
|  | Hemopexin OS=Homo sapiens GN=HPX PE=1 SV=2 |

|  |  |  |  |  |  |
| --- | --- | --- | --- | --- | --- |
|  | **Quantitation:** | **Ratio** | **Weighted** | **N** | **SD(geo)** |
|  |  | Patient1-Art/Control | 1.091 | 13 | 1.228 |
|  |  | Patient1-Porta/Control | 0.997 | 14 | 1.231 |
|  |  | Patient1-Hepa/Control | 1.053 | 13 | 1.205 |
|  |  | Patient3-Art/Control | 0.992 | 14 | NN |
|  |  | Patient3-Porta/Control | 1.115 | 14 | 1.222 |
|  |  | Patient3-Hepa/Control | 0.996 | 14 | 1.201 |

|  |  |  |  |  |  |  |  |  |  |  |  |  |  |  |  |  |
| --- | --- | --- | --- | --- | --- | --- | --- | --- | --- | --- | --- | --- | --- | --- | --- | --- |
|  | **Query** | **Observed** | **Mr(expt)** | **Mr(calc)** | **Delta** | **Miss** | **Score** | **Expect** | **Rank** | **Patient1-Art/Control** | **Patient1-Porta/Control** | **Patient1-Hepa/Control** | **Patient3-Art/Control** | **Patient3-Porta/Control** | **Patient3-Hepa/Control** | **Peptide** |
|  | 582 | **469.25** | **936.49** | **936.53** | **-0.05** | **0** | **22** | **0.17** | **1** | **---** | **---** | **---** | **---** | **---** | **---** | **R.FDPVR.G** 568 569 570 571 574 575 578 579 581 585 586 588 589 590 595 597 598 599 |
|  | 1357 | **525.77** | **1049.53** | **1049.60** | **-0.07** | **0** | **27** | **0.065** | **1** | **---** | **---** | **---** | **---** | **---** | **---** | **R.ELISER.W** 1358 1359 1360 1362 1363 1366 1370 1372 1373 |
|  | 3316 | 687.34 | 1372.66 | 1372.80 | -0.13 | 0 | 8 | 9.1 | 5 | --- | --- | --- | --- | --- | --- | K.GEFVWK.S 3314 3317 3321 3325 |
|  | 4131 | **762.91** | **1523.80** | **1523.80** | **-0.01** | **0** | **57** | **0.00013** | **1** | **1.535** | **0.779** | **0.798** | **0.956** | **1.019** | **0.755** | **K.NFPSPVDAAFR.Q** 4126 4127 |
|  | 4336 | **524.92** | **1571.73** | **1571.87** | **-0.15** | **1** | **20** | **0.41** | **1** | **---** | **---** | **---** | **---** | **---** | **---** | **R.FDPVRGEVPPR.Y** 4337 4338 4340 4341 4343 |
|  | 4562 | **545.92** | **1634.75** | **1634.83** | **-0.08** | **0** | **21** | **0.29** | **1** | **---** | **---** | **---** | **---** | **---** | **---** | **K.VDGALCMEK.S** |
|  | 5132 | **580.01** | **1736.99** | **1737.06** | **-0.06** | **1** | **24** | **0.27** | **1** | **---** | **---** | **---** | **---** | **---** | **---** | **R.RLWWLDLK.S** |
|  | 5221 | **583.97** | **1748.90** | **1748.99** | **-0.09** | **0** | **25** | **0.21** | **1** | **---** | **---** | **---** | **---** | **---** | **---** | **K.GGYTLVSGYPK.R** 5223 5224 |
|  | 5234 | **585.91** | **1754.72** | **1754.84** | **-0.12** | **0** | **16** | **0.33** | **1** | **---** | **---** | **---** | **---** | **---** | **---** | **R.DYFMPCPGR.G** 5235 |
|  | 5463 | **894.86** | **1787.71** | **1787.84** | **-0.13** | **0** | **29** | **0.012** | **1** | **1.022** | **1.309** | **0.765** | **0.701** | **1.276** | **1.671** | **R.YYCFQGNQFLR.F** 5464 5465 |
|  | 7138 | **698.32** | **2091.94** | **2092.05** | **-0.11** | **0** | **(15)** | **0.77** | **1** | **---** | **---** | **---** | **---** | **---** | **---** | **R.YYCFQGNQFLR.F** 7142 |
|  | 7143 | **698.34** | **2092.01** | **2092.05** | **-0.04** | **0** | **(16)** | **1.2** | **1** | **---** | **---** | **---** | **---** | **---** | **---** | **R.YYCFQGNQFLR.F** 7139 |
|  | 10910 | **886.41** | **2656.20** | **2656.33** | **-0.13** | **0** | **91** | **1.9e-008** | **1** | **0.640** | **0.804** | **0.922** | **0.846** | **1.046** | **0.874** | **K.LLQDEFPGIPSPLDAAVECHR.G** 10908 10909 10912 10913 10914 10915 10916 10917 |
|  | 11464 | **931.10** | **2790.28** | **2790.40** | **-0.12** | **0** | **78** | **4.3e-007** | **1** | **1.360** | **0.878** | **1.382** | **0.949** | **0.664** | **0.753** | **K.EVGTPHGIILDSVDAAFICPGSSR.L** 11450 11453 11454 11455 11456 11457 11459 11461 11467 11469 |

  


---

|  |  |
| --- | --- |
| **17.** | P02774    **Mass:** 67906    **Score:** 408    **Queries matched:** 87   **emPAI:** 0.61 |
|  | Vitamin D-binding protein OS=Homo sapiens GN=GC PE=1 SV=1 |

|  |  |  |  |  |  |
| --- | --- | --- | --- | --- | --- |
|  | **Quantitation:** | **Ratio** | **Weighted** | **N** | **SD(geo)** |
|  |  | Patient1-Art/Control | 0.896 | 13 | 1.716 |
|  |  | Patient1-Porta/Control | 0.886 | 12 | NN |
|  |  | Patient1-Hepa/Control | 0.825 | 12 | 1.423 |
|  |  | Patient3-Art/Control | 1.132 | 11 | 1.412 |
|  |  | Patient3-Porta/Control | 1.320 | 13 | 1.481 |
|  |  | Patient3-Hepa/Control | 1.060 | 12 | NN |

|  |  |  |  |  |  |  |  |  |  |  |  |  |  |  |  |  |
| --- | --- | --- | --- | --- | --- | --- | --- | --- | --- | --- | --- | --- | --- | --- | --- | --- |
|  | **Query** | **Observed** | **Mr(expt)** | **Mr(calc)** | **Delta** | **Miss** | **Score** | **Expect** | **Rank** | **Patient1-Art/Control** | **Patient1-Porta/Control** | **Patient1-Hepa/Control** | **Patient3-Art/Control** | **Patient3-Porta/Control** | **Patient3-Hepa/Control** | **Peptide** |
|  | 1803 | **568.32** | **1134.62** | **1134.76** | **-0.13** | **0** | **25** | **0.13** | **1** | **---** | **---** | **---** | **---** | **---** | **---** | **K.GPLLK.K** 1796 1797 1798 1799 1800 1802 1805 1806 1807 1808 1809 1810 1812 1813 1814 1815 1816 1817 1818 1819 1820 1821 1822 1823 1825 |
|  | 2886 | **648.35** | **1294.69** | **1294.84** | **-0.15** | **0** | **17** | **1.4** | **1** | **---** | **---** | **---** | **---** | **---** | **---** | **R.LSNLIK.L** |
|  | 3483 | **704.40** | **1406.78** | **1406.90** | **-0.12** | **0** | **16** | **1.7** | **1** | **---** | **---** | **---** | **---** | **---** | **---** | **K.VLEPTLK.S** 3480 3481 3482 |
|  | 4285 | **520.97** | **1559.87** | **1559.91** | **-0.04** | **0** | **20** | **0.68** | **1** | **---** | **---** | **---** | **---** | **---** | **---** | **K.ELPEHTVK.L** 4283 |
|  | 4426 | **801.84** | **1601.67** | **1601.80** | **-0.13** | **0** | **23** | **0.099** | **1** | **---** | **---** | **---** | **---** | **---** | **---** | **K.DVCDPGNTK.V** |
|  | 4900 | **567.91** | **1700.71** | **1700.75** | **-0.04** | **0** | **2** | **10** | **1** | **---** | **---** | **---** | **---** | **---** | **---** | **K.FEDCCQEK.T** |
|  | 5429 | **593.66** | **1777.97** | **1778.06** | **-0.09** | **0** | **13** | **3.4** | **1** | **---** | **---** | **---** | **---** | **---** | **---** | **R.THLPEVFLSK.V** |
|  | 5734 | **612.67** | **1834.97** | **1835.10** | **-0.12** | **1** | **33** | **0.029** | **1** | **2.824** | **1.083** | **1.468** | **2.066** | **2.488** | **1.897** | **R.KLCMAALK.H** 5733 5735 5736 5737 5740 |
|  | 6341 | **645.68** | **1934.03** | **1934.16** | **-0.12** | **1** | **39** | **0.0094** | **1** | **0.770** | **0.960** | **0.709** | **0.547** | **1.434** | **1.096** | **R.RTHLPEVFLSK.V** 6340 |
|  | 6706 | **666.34** | **1996.00** | **1996.09** | **-0.09** | **1** | **11** | **4.8** | **1** | **---** | **---** | **---** | **---** | **---** | **---** | **K.VMDKYTFELSR.R** |
|  | 6775 | **671.66** | **2011.95** | **2012.09** | **-0.13** | **1** | **(5)** | **13** | **1** | **---** | **---** | **---** | **---** | **---** | **---** | **K.VMDKYTFELSR.R** |
|  | 10803 | **652.60** | **2606.38** | **2606.52** | **-0.14** | **1** | **50** | **0.00059** | **1** | **0.880** | **0.840** | **0.809** | **1.203** | **1.384** | **1.030** | **R.KFPSGTFEQVSQLVK.E** 10802 10804 |
|  | 11418 | **930.36** | **2788.05** | **2788.11** | **-0.06** | **0** | **3** | **0.5** | **1** | **---** | **---** | **---** | **---** | **---** | **---** | **K.EVVSLTEACCAEGADPDCYDTR.T** |
|  | 12037 | **733.33** | **2929.30** | **2929.35** | **-0.05** | **0** | **1** | **12** | **3** | **---** | **---** | **---** | **---** | **---** | **---** | **K.SYLSMVGSCCTSASPTVCFLK.E** 12038 12041 12042 12053 |
|  | 12234 | **992.21** | **2973.61** | **2973.67** | **-0.07** | **0** | **59** | **8.5e-005** | **1** | **0.933** | **-0.053** | **-0.003** | **-0.020** | **0.538** | **-0.019** | **K.VPTADLEDVLPLAEDITNILSK.C** 12208 12209 12211 12212 12213 12214 12215 12216 12217 12219 12220 12221 12222 12223 12224 12225 12226 12227 12228 12229 12230 12231 12232 12233 12235 12236 12237 |
|  | 12395 | **1000.74** | **2999.21** | **2999.37** | **-0.16** | **0** | **29** | **0.004** | **1** | **1.502** | **0.842** | **1.118** | **1.022** | **1.068** | **1.228** | **K.HQPQEFPTYVEPTNDEICEAFR.K** |
|  | 13234 | **826.85** | **3303.38** | **3303.58** | **-0.20** | **0** | **(22)** | **0.025** | **1** | **---** | **---** | **---** | **---** | **---** | **---** | **K.HQPQEFPTYVEPTNDEICEAFR.K** |
|  | 14340 | **982.45** | **3925.75** | **3925.95** | **-0.20** | **0** | **10** | **0.99** | **1** | **---** | **---** | **---** | **---** | **---** | **---** | **K.TAMDVFVCTYFMPAAQLPELPDVELPTNK.D** |
|  | 15322 | **1042.10** | **5205.44** | **5205.53** | **-0.09** | **1** | **0** | **12** | **2** | **---** | **---** | **---** | **---** | **---** | **---** | **K.TAMDVFVCTYFMPAAQLPELPDVELPTNKDVCDPGNTK.V** |

  


---

|  |  |
| --- | --- |
| **18.** | P06727    **Mass:** 54193    **Score:** 396    **Queries matched:** 37   **emPAI:** 0.59 |
|  | Apolipoprotein A-IV OS=Homo sapiens GN=APOA4 PE=1 SV=3 |

|  |  |  |  |  |  |
| --- | --- | --- | --- | --- | --- |
|  | **Quantitation:** | **Ratio** | **Weighted** | **N** | **SD(geo)** |
|  |  | Patient1-Art/Control | 1.336 | 15 | NN |
|  |  | Patient1-Porta/Control | 1.347 | 15 | NN |
|  |  | Patient1-Hepa/Control | 1.322 | 15 | NN |
|  |  | Patient3-Art/Control | 1.009 | 15 | NN |
|  |  | Patient3-Porta/Control | 0.870 | 15 | NN |
|  |  | Patient3-Hepa/Control | 0.941 | 15 | 1.515 |

|  |  |  |  |  |  |  |  |  |  |  |  |  |  |  |  |  |
| --- | --- | --- | --- | --- | --- | --- | --- | --- | --- | --- | --- | --- | --- | --- | --- | --- |
|  | **Query** | **Observed** | **Mr(expt)** | **Mr(calc)** | **Delta** | **Miss** | **Score** | **Expect** | **Rank** | **Patient1-Art/Control** | **Patient1-Porta/Control** | **Patient1-Hepa/Control** | **Patient3-Art/Control** | **Patient3-Porta/Control** | **Patient3-Hepa/Control** | **Peptide** |
|  | 2782 | **640.33** | **1278.64** | **1278.71** | **-0.07** | **0** | **17** | **1.2** | **1** | **---** | **---** | **---** | **---** | **---** | **---** | **R.ISASAEELR.Q** |
|  | 2875 | **644.36** | **1286.71** | **1286.75** | **-0.04** | **0** | **19** | **0.56** | **2** | **---** | **---** | **---** | **---** | **---** | **---** | **R.LAPLAEDVR.G** 2873 2874 |
|  | 4286 | **521.27** | **1560.79** | **1560.91** | **-0.12** | **0** | **5** | **18** | **2** | **---** | **---** | **---** | **---** | **---** | **---** | **K.EAVEHLQK.S** 4288 |
|  | 4457 | **539.26** | **1614.76** | **1614.90** | **-0.15** | **0** | **64** | **1.7e-005** | **1** | **1.686** | **1.224** | **1.530** | **0.964** | **0.579** | **0.711** | **K.LVPFATELHER.L** 4458 |
|  | 4830 | **564.61** | **1690.79** | **1690.94** | **-0.15** | **0** | **18** | **0.57** | **1** | **---** | **---** | **---** | **---** | **---** | **---** | **R.LTPYADEFK.V** 4831 4832 4833 4837 4839 |
|  | 4880 | **566.06** | **1695.15** | **1694.97** | **0.18** | **0** | **7** | **9.5** | **1** | **---** | **---** | **---** | **---** | **---** | **---** | **K.IDQNVEELK.G** 4877 |
|  | 5765 | **615.31** | **1842.91** | **1843.08** | **-0.16** | **0** | **47** | **0.001** | **1** | **1.365** | **1.476** | **1.216** | **0.903** | **1.044** | **1.040** | **R.LLPHANEVSQK.I** |
|  | 6500 | **654.31** | **1959.92** | **1960.06** | **-0.15** | **1** | **35** | **0.012** | **1** | **1.466** | **1.748** | **1.312** | **1.418** | **0.982** | **0.702** | **R.RVEPYGENFNK.A** 6501 |
|  | 6949 | **512.78** | **2047.10** | **2047.20** | **-0.11** | **1** | **44** | **0.003** | **1** | **0.755** | **2.560** | **0.337** | **0.562** | **1.148** | **0.712** | **K.KLVPFATELHER.L** 6954 |
|  | 7008 | **517.02** | **2064.04** | **2064.16** | **-0.12** | **2** | **0** | **53** | **4** | **---** | **---** | **---** | **---** | **---** | **---** | **R.QLTPYAQRMERVLR.E** |
|  | 8137 | **728.38** | **2182.10** | **2182.20** | **-0.10** | **0** | **23** | **0.27** | **1** | **---** | **---** | **---** | **---** | **---** | **---** | **K.LNHQLEGLTFQMK.K** 8138 |
|  | 8486 | **744.67** | **2230.98** | **2231.15** | **-0.17** | **0** | **70** | **1.5e-006** | **1** | **0.793** | **1.169** | **1.319** | **0.675** | **0.812** | **0.662** | **K.SLAELGGHLDQQVEEFR.R** 8487 8488 |
|  | 8509 | **748.38** | **2242.13** | **2242.24** | **-0.12** | **0** | **65** | **1.6e-005** | **1** | **1.253** | **1.008** | **1.196** | **0.939** | **1.002** | **0.837** | **K.SELTQQLNALFQDK.L** 8504 8505 8506 8507 8511 8512 8514 |
|  | 9231 | **597.82** | **2387.24** | **2387.25** | **-0.01** | **1** | **13** | **2.8** | **1** | **---** | **---** | **---** | **---** | **---** | **---** | **K.SLAELGGHLDQQVEEFRR.R** |
|  | 9948 | **625.36** | **2497.39** | **2497.49** | **-0.09** | **2** | **10** | **6.5** | **1** | **---** | **---** | **---** | **---** | **---** | **---** | **K.LKEEIGKELEELR.A** |

  


---

|  |  |
| --- | --- |
| **19.** | P00751    **Mass:** 103009   **Score:** 380    **Queries matched:** 55   **emPAI:** 0.47 |
|  | Complement factor B OS=Homo sapiens GN=CFB PE=1 SV=2 |

|  |  |  |  |  |  |
| --- | --- | --- | --- | --- | --- |
|  | **Quantitation:** | **Ratio** | **Weighted** | **N** | **SD(geo)** |
|  |  | Patient1-Art/Control | 0.986 | 7 | 1.157 |
|  |  | Patient1-Porta/Control | 1.087 | 9 | 1.957 |
|  |  | Patient1-Hepa/Control | 1.126 | 8 | 1.492 |
|  |  | Patient3-Art/Control | 1.180 | 10 | 1.312 |
|  |  | Patient3-Porta/Control | 1.326 | 9 | 1.846 |
|  |  | Patient3-Hepa/Control | 1.150 | 10 | 1.418 |

|  |  |  |  |  |  |  |  |  |  |  |  |  |  |  |  |  |
| --- | --- | --- | --- | --- | --- | --- | --- | --- | --- | --- | --- | --- | --- | --- | --- | --- |
|  | **Query** | **Observed** | **Mr(expt)** | **Mr(calc)** | **Delta** | **Miss** | **Score** | **Expect** | **Rank** | **Patient1-Art/Control** | **Patient1-Porta/Control** | **Patient1-Hepa/Control** | **Patient3-Art/Control** | **Patient3-Porta/Control** | **Patient3-Hepa/Control** | **Peptide** |
|  | 256 | **432.24** | **862.48** | **862.55** | **-0.08** | **0** | **17** | **0.92** | **1** | **---** | **---** | **---** | **---** | **---** | **---** | **R.GLTLR.G** 257 258 261 |
|  | 2677 | **630.33** | **1258.64** | **1258.77** | **-0.13** | **0** | **6** | **15** | **2** | **---** | **---** | **---** | **---** | **---** | **---** | **K.EVYIK.N** |
|  | 3179 | **677.35** | **1352.68** | **1352.71** | **-0.03** | **0** | **51** | **0.00075** | **1** | **1.734** | **2.828** | **0.487** | **1.431** | **1.946** | **0.565** | **K.LQDEDLGFL.-** 3178 3180 |
|  | 3716 | **482.58** | **1444.72** | **1444.86** | **-0.14** | **1** | **11** | **6.5** | **1** | **---** | **---** | **---** | **---** | **---** | **---** | **R.KVGSQYR.L** |
|  | 4386 | **528.93** | **1583.77** | **1583.96** | **-0.19** | **0** | **37** | **0.011** | **1** | **1.104** | **1.431** | **1.126** | **1.451** | **1.505** | **1.276** | **K.VASYGVKPR.Y** 4387 |
|  | 4398 | **529.29** | **1584.85** | **1584.92** | **-0.07** | **0** | **31** | **0.063** | **1** | **---** | **---** | **---** | **---** | **---** | **---** | **K.CLVNLIEK.V** 4400 4403 4405 |
|  | 4814 | **563.29** | **1686.86** | **1686.99** | **-0.13** | **0** | **46** | **0.0015** | **1** | **0.803** | **0.648** | **1.359** | **1.053** | **0.907** | **0.897** | **R.GDSGGPLIVHK.R** 4815 |
|  | 4840 | **564.67** | **1690.98** | **1691.07** | **-0.09** | **1** | **8** | **10** | **1** | **---** | **---** | **---** | **---** | **---** | **---** | **R.KEVYIK.N** |
|  | 5126 | **579.29** | **1734.86** | **1734.90** | **-0.04** | **0** | **7** | **11** | **1** | **---** | **---** | **---** | **---** | **---** | **---** | **R.DAQYAPGYDK.V** 5128 |
|  | 5312 | **588.66** | **1762.96** | **1763.03** | **-0.07** | **0** | **34** | **0.025** | **1** | **###** | **###** | **###** | **###** | **###** | **###** | **K.EELLPAQDIK.A** 5314 |
|  | 5856 | **617.66** | **1849.96** | **1850.11** | **-0.15** | **1** | **31** | **0.054** | **1** | **1.025** | **1.016** | **1.233** | **1.202** | **1.555** | **1.279** | **K.VKDISEVVTPR.F** 5857 |
|  | 6183 | **638.98** | **1913.93** | **1914.06** | **-0.13** | **1** | **51** | **0.00038** | **1** | **0.998** | **1.218** | **1.040** | **0.863** | **0.937** | **0.892** | **K.EKLQDEDLGFL.-** 6182 6186 6187 |
|  | 6992 | **515.02** | **2056.06** | **2056.18** | **-0.12** | **1** | **7** | **13** | **1** | **---** | **---** | **---** | **---** | **---** | **---** | **K.KDNEQHVFK.V** |
|  | 7135 | **698.07** | **2091.18** | **2091.23** | **-0.06** | **1** | **23** | **0.38** | **1** | **---** | **---** | **---** | **---** | **---** | **---** | **K.ALFVSEEEKK.L** 7130 7133 7136 7137 |
|  | 7252 | **706.37** | **2116.07** | **2116.09** | **-0.02** | **0** | **19** | **0.68** | **1** | **---** | **---** | **---** | **---** | **---** | **---** | **K.VSEADSSNADWVTK.Q** 7250 |
|  | 8845 | **579.55** | **2314.17** | **2314.27** | **-0.10** | **0** | **17** | **1.1** | **1** | **---** | **---** | **---** | **---** | **---** | **---** | **K.QLNEINYEDHK.L** 8844 8847 |
|  | 9608 | **817.72** | **2450.15** | **2450.32** | **-0.17** | **0** | **49** | **0.00044** | **1** | **0.844** | **0.713** | **-0.108** | **0.793** | **0.877** | **0.864** | **K.EAGIPEFYDYDVALIK.L** 9607 9610 |
|  | 12753 | **1036.81** | **3107.41** | **3107.54** | **-0.13** | **0** | **70** | **2e-006** | **1** | **0.000** | **0.000** | **-0.077** | **1.269** | **2.286** | **0.766** | **R.LLQEGQALEYVCPSGFYPYPVQTR.T** 12750 12752 12754 12755 12756 12757 12758 12759 12760 12762 12764 12765 |

  


---

|  |  |
| --- | --- |
| **20.** | P08697    **Mass:** 60891    **Score:** 367    **Queries matched:** 10   **emPAI:** 0.19 |
|  | Alpha-2-antiplasmin OS=Homo sapiens GN=SERPINF2 PE=1 SV=3 |

|  |  |  |  |  |  |
| --- | --- | --- | --- | --- | --- |
|  | **Quantitation:** | **Ratio** | **Weighted** | **N** | **SD(geo)** |
|  |  | Patient1-Art/Control | 1.174 | 4 | 6.079 |
|  |  | Patient1-Porta/Control | 0.820 | 4 | NN |
|  |  | Patient1-Hepa/Control | 1.246 | 4 | 2.647 |
|  |  | Patient3-Art/Control | 1.282 | 4 | 3.797 |
|  |  | Patient3-Porta/Control | 1.343 | 4 | 3.144 |
|  |  | Patient3-Hepa/Control | 1.311 | 4 | 4.605 |

|  |  |  |  |  |  |  |  |  |  |  |  |  |  |  |  |  |
| --- | --- | --- | --- | --- | --- | --- | --- | --- | --- | --- | --- | --- | --- | --- | --- | --- |
|  | **Query** | **Observed** | **Mr(expt)** | **Mr(calc)** | **Delta** | **Miss** | **Score** | **Expect** | **Rank** | **Patient1-Art/Control** | **Patient1-Porta/Control** | **Patient1-Hepa/Control** | **Patient3-Art/Control** | **Patient3-Porta/Control** | **Patient3-Hepa/Control** | **Peptide** |
|  | 9772 | **820.07** | **2457.20** | **2457.27** | **-0.07** | **0** | **24** | **0.19** | **1** | **---** | **---** | **---** | **---** | **---** | **---** | **K.LVPPMEEDYPQFGSPK.-** 9773 |
|  | 12458 | **1015.15** | **3042.43** | **3042.61** | **-0.18** | **0** | **153** | **1.5e-014** | **1** | **1.029** | **0.464** | **1.356** | **0.741** | **0.924** | **1.018** | **K.HQMDLVATLSQLGLQELFQAPDLR.G** 12461 12462 12464 12466 12467 12468 12469 |

  


---

|  |  |
| --- | --- |
| **21.** | P04196    **Mass:** 67319    **Score:** 362    **Queries matched:** 17   **emPAI:** 0.17 |
|  | Histidine-rich glycoprotein OS=Homo sapiens GN=HRG PE=1 SV=1 |

|  |  |  |  |  |  |
| --- | --- | --- | --- | --- | --- |
|  | **Quantitation:** | **Ratio** | **Weighted** | **N** | **SD(geo)** |
|  |  | Patient1-Art/Control | 1.015 | 9 | NN |
|  |  | Patient1-Porta/Control | 1.024 | 8 | 2.005 |
|  |  | Patient1-Hepa/Control | 0.840 | 10 | 2.790 |
|  |  | Patient3-Art/Control | 1.363 | 10 | 2.345 |
|  |  | Patient3-Porta/Control | 1.419 | 8 | 2.190 |
|  |  | Patient3-Hepa/Control | 1.066 | 10 | 2.608 |

|  |  |  |  |  |  |  |  |  |  |  |  |  |  |  |  |  |
| --- | --- | --- | --- | --- | --- | --- | --- | --- | --- | --- | --- | --- | --- | --- | --- | --- |
|  | **Query** | **Observed** | **Mr(expt)** | **Mr(calc)** | **Delta** | **Miss** | **Score** | **Expect** | **Rank** | **Patient1-Art/Control** | **Patient1-Porta/Control** | **Patient1-Hepa/Control** | **Patient3-Art/Control** | **Patient3-Porta/Control** | **Patient3-Hepa/Control** | **Peptide** |
|  | 3425 | **697.88** | **1393.75** | **1393.88** | **-0.12** | **0** | **9** | **8.2** | **1** | **---** | **---** | **---** | **---** | **---** | **---** | **K.ALDLINK.R** |
|  | 3619 | **476.21** | **1425.60** | **1425.70** | **-0.10** | **0** | **37** | **0.0043** | **1** | **1.004** | **0.557** | **1.061** | **1.284** | **0.797** | **0.515** | **R.HPNVFGFCR.A** |
|  | 3639 | **714.89** | **1427.76** | **1427.81** | **-0.05** | **0** | **19** | **0.7** | **1** | **---** | **---** | **---** | **---** | **---** | **---** | **R.DGYLFQLLR.I** |
|  | 4219 | **517.63** | **1549.88** | **1549.98** | **-0.09** | **1** | **12** | **4.9** | **1** | **---** | **---** | **---** | **---** | **---** | **---** | **K.ALDLINKR.R** 4218 |
|  | 7585 | **710.32** | **2127.93** | **2128.07** | **-0.14** | **1** | **40** | **0.0017** | **1** | **0.983** | **1.113** | **0.920** | **1.509** | **1.402** | **1.087** | **K.YKEENDDFASFR.V** 7584 |
|  | 9525 | **811.74** | **2432.20** | **2432.29** | **-0.10** | **0** | **79** | **6.3e-007** | **1** | **0.866** | **1.179** | **0.680** | **1.636** | **1.512** | **0.829** | **R.ADLFYDVEALDLESPK.N** 9521 9522 9523 9524 9526 9527 9528 9530 9531 |

  


---

|  |  |
| --- | --- |
| **22.** | P01834    **Mass:** 14477    **Score:** 359    **Queries matched:** 13   **emPAI:** 0.27 |
|  | Ig kappa chain C region OS=Homo sapiens GN=IGKC PE=1 SV=1 |

|  |  |  |  |  |  |
| --- | --- | --- | --- | --- | --- |
|  | **Quantitation:** | **Ratio** | **Weighted** | **N** | **SD(geo)** |
|  |  | Patient1-Art/Control | 1.399 | 11 | NN |
|  |  | **Patient1-Porta/Control** | **1.491** | **11** | **1.914** |
|  |  | Patient1-Hepa/Control | 1.335 | 11 | 2.455 |
|  |  | Patient3-Art/Control | 0.862 | 11 | 1.802 |
|  |  | **Patient3-Porta/Control** | **0.728** | **10** | **1.475** |
|  |  | Patient3-Hepa/Control | 0.676 | 10 | 1.743 |

|  |  |  |  |  |  |  |  |  |  |  |  |  |  |  |  |  |
| --- | --- | --- | --- | --- | --- | --- | --- | --- | --- | --- | --- | --- | --- | --- | --- | --- |
|  | **Query** | **Observed** | **Mr(expt)** | **Mr(calc)** | **Delta** | **Miss** | **Score** | **Expect** | **Rank** | **Patient1-Art/Control** | **Patient1-Porta/Control** | **Patient1-Hepa/Control** | **Patient3-Art/Control** | **Patient3-Porta/Control** | **Patient3-Hepa/Control** | **Peptide** |
|  | 10459 | **852.09** | **2553.26** | **2553.43** | **-0.17** | **0** | **72** | **3.2e-006** | **1** | **1.149** | **0.723** | **1.570** | **0.852** | **0.435** | **0.467** | **-.TVAAPSVFIFPPSDEQLK.S** 10460 10461 10462 10463 10464 10465 10466 10467 10468 10469 10470 10471 |

  


---

|  |  |
| --- | --- |
| **23.** | P02765    **Mass:** 45115    **Score:** 357    **Queries matched:** 123   **emPAI:** 0.89 |
|  | Alpha-2-HS-glycoprotein OS=Homo sapiens GN=AHSG PE=1 SV=1 |

|  |  |  |  |  |  |
| --- | --- | --- | --- | --- | --- |
|  | **Quantitation:** | **Ratio** | **Weighted** | **N** | **SD(geo)** |
|  |  | Patient1-Art/Control | 0.846 | 9 | 76.983 |
|  |  | Patient1-Porta/Control | 0.947 | 9 | 20.472 |
|  |  | Patient1-Hepa/Control | 0.993 | 10 | NN |
|  |  | Patient3-Art/Control | 1.247 | 11 | 324.062 |
|  |  | Patient3-Porta/Control | 1.522 | 11 | 423.442 |
|  |  | Patient3-Hepa/Control | 1.227 | 11 | 931.829 |

|  |  |  |  |  |  |  |  |  |  |  |  |  |  |  |  |  |
| --- | --- | --- | --- | --- | --- | --- | --- | --- | --- | --- | --- | --- | --- | --- | --- | --- |
|  | **Query** | **Observed** | **Mr(expt)** | **Mr(calc)** | **Delta** | **Miss** | **Score** | **Expect** | **Rank** | **Patient1-Art/Control** | **Patient1-Porta/Control** | **Patient1-Hepa/Control** | **Patient3-Art/Control** | **Patient3-Porta/Control** | **Patient3-Hepa/Control** | **Peptide** |
|  | 2564 | **616.84** | **1231.67** | **1231.79** | **-0.12** | **0** | **20** | **0.58** | **1** | **---** | **---** | **---** | **---** | **---** | **---** | **R.VVHAAK.A** |
|  | 2667 | **628.85** | **1255.69** | **1255.76** | **-0.07** | **0** | **18** | **0.95** | **1** | **---** | **---** | **---** | **---** | **---** | **---** | **K.ATLSEK.L** 2657 2659 2661 2664 2665 |
|  | 3083 | **664.33** | **1326.65** | **1326.76** | **-0.11** | **0** | **15** | **1.8** | **1** | **---** | **---** | **---** | **---** | **---** | **---** | **K.EATEAAK.C** 3080 |
|  | 3441 | **700.29** | **1398.56** | **1398.72** | **-0.16** | **0** | **9** | **1.9** | **1** | **---** | **---** | **---** | **---** | **---** | **---** | **K.QYGFCK.A** |
|  | 3596 | **711.38** | **1420.74** | **1420.85** | **-0.11** | **0** | **35** | **0.02** | **1** | **0.648** | **0.623** | **0.728** | **0.966** | **0.738** | **0.882** | **K.FSVVYAK.C** 3593 3595 3600 3608 |
|  | 3710 | **722.83** | **1443.64** | **1443.80** | **-0.17** | **0** | **32** | **0.019** | **1** | **0.871** | **0.858** | **1.026** | **1.408** | **1.665** | **1.164** | **K.CNLLAEK.Q** 3711 3712 |
|  | 5058 | **575.99** | **1724.96** | **1725.06** | **-0.10** | **0** | **(8)** | **12** | **1** | **---** | **---** | **---** | **---** | **---** | **---** | **K.FSVVYAK.C** 5059 |
|  | 5582 | **602.31** | **1803.90** | **1804.03** | **-0.14** | **0** | **42** | **0.0032** | **1** | **0.849** | **1.036** | **0.985** | **1.138** | **1.476** | **1.305** | **K.HTLNQIDEVK.V** |
|  | 8555 | **753.38** | **2257.11** | **2257.13** | **-0.02** | **0** | **30** | **0.048** | **1** | **0.349** | **1.796** | **0.760** | **1.203** | **0.854** | **2.829** | **K.EHAVEGDCDFQLLK.L** |
|  | 8829 | **770.40** | **2308.18** | **2308.23** | **-0.06** | **0** | **53** | **0.00031** | **1** | **0.867** | **1.406** | **0.746** | **1.897** | **2.916** | **1.131** | **R.TVVQPSVGAAAGPVVPPCPGR.I** 8825 8826 8827 8828 |
|  | 12078 | **733.62** | **2930.45** | **2930.58** | **-0.12** | **1** | **20** | **0.47** | **1** | **---** | **---** | **---** | **---** | **---** | **---** | **R.QLKEHAVEGDCDFQLLK.L** 12065 12067 12070 12074 12075 12079 12080 12081 12082 12084 12086 12088 12089 12090 |
|  | 12961 | **1059.51** | **3175.51** | **3175.68** | **-0.17** | **0** | **67** | **5.9e-006** | **1** | **-0.017** | **1.469** | **-0.227** | **1.983** | **1.227** | **1.230** | **R.AQLVPLPPSTYVEFTVSGTDCVAK.E** 12952 12953 12956 12958 12959 12960 12962 12964 12967 12971 12974 12977 12981 12983 12986 12987 12989 12990 12992 12993 12994 12996 12997 12998 12999 13002 13003 13005 13006 13009 13010 13014 13015 13016 13020 13023 13025 13026 13028 13030 13031 13032 13033 13034 13035 13039 13041 13042 13609 | **870.93** | **3479.68** | **3479.88** | **-0.20** | **0** | **(12)** | **2.1** | **1** | **---** | **---** | **---** | **---** | **---** | **---** | **R.AQLVPLPPSTYVEFTVSGTDCVAK.E** 13612 13613 |
|  | 14363 | **990.94** | **3959.75** | **3959.92** | **-0.17** | **0** | **9** | **0.93** | **1** | **---** | **---** | **---** | **---** | **---** | **---** | **R.QPNCDDPETEEAALVAIDYINQNLPWGYK.H** |

  


---

|  |  |
| --- | --- |
| **24.** | P01042    **Mass:** 88605    **Score:** 323    **Queries matched:** 45   **emPAI:** 0.51 |
|  | Kininogen-1 OS=Homo sapiens GN=KNG1 PE=1 SV=2 |

|  |  |  |  |  |  |
| --- | --- | --- | --- | --- | --- |
|  | **Quantitation:** | **Ratio** | **Weighted** | **N** | **SD(geo)** |
|  |  | Patient1-Art/Control | 1.007 | 10 | 2.567 |
|  |  | Patient1-Porta/Control | 1.080 | 7 | 1.440 |
|  |  | Patient1-Hepa/Control | 0.797 | 10 | 2.472 |
|  |  | Patient3-Art/Control | 1.009 | 8 | 1.636 |
|  |  | Patient3-Porta/Control | 0.989 | 9 | 2.281 |
|  |  | Patient3-Hepa/Control | 1.051 | 8 | 1.674 |

|  |  |  |  |  |  |  |  |  |  |  |  |  |  |  |  |  |
| --- | --- | --- | --- | --- | --- | --- | --- | --- | --- | --- | --- | --- | --- | --- | --- | --- |
|  | **Query** | **Observed** | **Mr(expt)** | **Mr(calc)** | **Delta** | **Miss** | **Score** | **Expect** | **Rank** | **Patient1-Art/Control** | **Patient1-Porta/Control** | **Patient1-Hepa/Control** | **Patient3-Art/Control** | **Patient3-Porta/Control** | **Patient3-Hepa/Control** | **Peptide** |
|  | 1872 | **572.24** | **1142.46** | **1142.54** | **-0.08** | **0** | **24** | **0.092** | **1** | **---** | **---** | **---** | **---** | **---** | **---** | **K.ICVGCPR.D** 1871 |
|  | 2319 | **598.85** | **1195.69** | **1195.74** | **-0.05** | **0** | **13** | **5.1** | **1** | **---** | **---** | **---** | **---** | **---** | **---** | **K.IDNVK.K** 2312 2313 2314 2317 2322 2323 |
|  | 2958 | **654.87** | **1307.73** | **1307.84** | **-0.11** | **0** | **33** | **0.029** | **1** | **1.019** | **1.211** | **0.459** | **1.565** | **1.382** | **1.548** | **R.VQVVAGK.K** 2959 |
|  | 3103 | **667.81** | **1333.60** | **1333.73** | **-0.13** | **0** | **38** | **0.0063** | **1** | **0.902** | **0.977** | **0.981** | **1.140** | **0.922** | **0.915** | **K.YFIDFVAR.E** 3104 3105 |
|  | 3253 | **682.86** | **1363.71** | **1363.77** | **-0.06** | **0** | **28** | **0.078** | **1** | **---** | **---** | **---** | **---** | **---** | **---** | **K.RPPGFSPFR.S** 3251 3254 3255 |
|  | 5065 | **576.67** | **1726.98** | **1727.11** | **-0.12** | **1** | **25** | **0.22** | **1** | **---** | **---** | **---** | **---** | **---** | **---** | **K.AVDAALKK.Y** |
|  | 5287 | **588.33** | **1761.96** | **1761.92** | **0.04** | **0** | **15** | **1.9** | **1** | **---** | **---** | **---** | **---** | **---** | **---** | **K.AATGECTATVGK.R** 5285 |
|  | 5343 | **589.64** | **1765.89** | **1766.03** | **-0.14** | **1** | **29** | **0.09** | **1** | **---** | **---** | **---** | **---** | **---** | **---** | **K.KYFIDFVAR.E** 5346 5347 5348 5349 5350 5356 5357 5358 |
|  | 5891 | **620.64** | **1858.88** | **1858.99** | **-0.11** | **0** | **44** | **0.0019** | **1** | **0.864** | **1.600** | **1.740** | **1.369** | **0.774** | **0.970** | **K.TVGSDTFYSFK.Y** 5889 5890 5893 5895 |
|  | 6551 | **660.97** | **1979.87** | **1980.03** | **-0.16** | **0** | **53** | **0.0001** | **1** | **0.444** | **0.340** | **0.428** | **0.662** | **0.303** | **0.349** | **K.ENFLFLTPDCK.S** 6552 6553 6554 6555 6556 |
|  | 10576 | **865.42** | **2593.23** | **2593.36** | **-0.13** | **0** | **35** | **0.011** | **1** | **3.528** | **-0.229** | **1.940** | **-0.206** | **3.962** | **2.406** | **K.IYPTVNCQPLGMISLMK.R** |
|  | 12850 | **784.91** | **3135.60** | **3135.69** | **-0.08** | **1** | **17** | **1.1** | **1** | **---** | **---** | **---** | **---** | **---** | **---** | **K.KLGQSLDCNAEVYVVPWEK.K** 12848 |
|  | 13404 | **854.16** | **3412.62** | **3412.79** | **-0.17** | **1** | **50** | **0.00032** | **1** | **0.809** | **0.905** | **0.732** | **1.135** | **1.296** | **1.046** | **R.IASFSQNCDIYPGKDFVQPPTK.I** |

  


---

|  |  |
| --- | --- |
| **25.** | P02763    **Mass:** 28244    **Score:** 265    **Queries matched:** 29   **emPAI:** 0.66 |
|  | Alpha-1-acid glycoprotein 1 OS=Homo sapiens GN=ORM1 PE=1 SV=1 |

|  |  |  |  |  |  |
| --- | --- | --- | --- | --- | --- |
|  | **Quantitation:** | **Ratio** | **Weighted** | **N** | **SD(geo)** |
|  |  | Patient1-Art/Control | 1.160 | 7 | 2.037 |
|  |  | Patient1-Porta/Control | 1.292 | 7 | 1.272 |
|  |  | Patient1-Hepa/Control | 1.131 | 7 | NN |
|  |  | Patient3-Art/Control | 0.762 | 7 | 1.881 |
|  |  | **Patient3-Porta/Control** | **0.760** | **7** | **1.336** |
|  |  | Patient3-Hepa/Control | 0.818 | 7 | 1.462 |

|  |  |  |  |  |  |  |  |  |  |  |  |  |  |  |  |  |
| --- | --- | --- | --- | --- | --- | --- | --- | --- | --- | --- | --- | --- | --- | --- | --- | --- |
|  | **Query** | **Observed** | **Mr(expt)** | **Mr(calc)** | **Delta** | **Miss** | **Score** | **Expect** | **Rank** | **Patient1-Art/Control** | **Patient1-Porta/Control** | **Patient1-Hepa/Control** | **Patient3-Art/Control** | **Patient3-Porta/Control** | **Patient3-Hepa/Control** | **Peptide** |
|  | 1034 | **500.75** | **999.49** | **999.53** | **-0.04** | **0** | **25** | **0.14** | **1** | **---** | **---** | **---** | **---** | **---** | **---** | **R.EYQTR.Q** 1022 1023 1024 1026 1030 1033 |
|  | 3307 | 686.78 | 1371.55 | 1371.74 | -0.19 | 0 | 4 | 5.1 | 1 | --- | --- | --- | --- | --- | --- | K.CEPLEK.Q |
|  | 3534 | **707.84** | **1413.66** | **1413.76** | **-0.09** | **1** | **29** | **0.053** | **1** | **0.392** | **1.217** | **1.095** | **1.019** | **0.933** | **0.966** | **R.KQEEGES.-** 3529 3533 3536 |
|  | 5050 | **860.96** | **1719.91** | **1719.93** | **-0.02** | **0** | **7** | **14** | **1** | **---** | **---** | **---** | **---** | **---** | **---** | **K.SDVVYTDWK.K** |
|  | 6227 | **640.63** | **1918.88** | **1919.06** | **-0.18** | **1** | **14** | **1.6** | **1** | **---** | **---** | **---** | **---** | **---** | **---** | **K.DKCEPLEK.Q** 6230 6232 6236 |
|  | 6851 | **679.28** | **2034.83** | **2034.97** | **-0.14** | **0** | **77** | **1.7e-007** | **1** | **1.194** | **1.698** | **1.034** | **0.843** | **0.752** | **0.900** | **K.EQLGEFYEALDCLR.I** 6850 6856 6857 6859 6861 6863 6865 |
|  | 6993 | **515.02** | **2056.06** | **2056.15** | **-0.09** | **0** | **58** | **0.0001** | **1** | **4.403** | **1.565** | **1.191** | **2.230** | **0.636** | **0.931** | **R.YVGGQEHFAHLLILR.D** 6991 6994 |
|  | 9106 | **591.09** | **2360.32** | **2360.36** | **-0.04** | **0** | **(15)** | **2.1** | **1** | **---** | **---** | **---** | **---** | **---** | **---** | **R.YVGGQEHFAHLLILR.D** |

  


---

|  |  |
| --- | --- |
| **26.** | P00734    **Mass:** 80314    **Score:** 230    **Queries matched:** 18   **emPAI:** 0.20 |
|  | Prothrombin OS=Homo sapiens GN=F2 PE=1 SV=2 |

|  |  |  |  |  |  |
| --- | --- | --- | --- | --- | --- |
|  | **Quantitation:** | **Ratio** | **Weighted** | **N** | **SD(geo)** |
|  |  | Patient1-Art/Control | 0.995 | 7 | 1.805 |
|  |  | Patient1-Porta/Control | 1.053 | 7 | 1.386 |
|  |  | Patient1-Hepa/Control | 1.151 | 5 | 1.423 |
|  |  | Patient3-Art/Control | 1.284 | 7 | 1.730 |
|  |  | Patient3-Porta/Control | 1.172 | 6 | 1.667 |
|  |  | Patient3-Hepa/Control | 1.101 | 7 | 1.305 |

|  |  |  |  |  |  |  |  |  |  |  |  |  |  |  |  |  |
| --- | --- | --- | --- | --- | --- | --- | --- | --- | --- | --- | --- | --- | --- | --- | --- | --- |
|  | **Query** | **Observed** | **Mr(expt)** | **Mr(calc)** | **Delta** | **Miss** | **Score** | **Expect** | **Rank** | **Patient1-Art/Control** | **Patient1-Porta/Control** | **Patient1-Hepa/Control** | **Patient3-Art/Control** | **Patient3-Porta/Control** | **Patient3-Hepa/Control** | **Peptide** |
|  | 3983 | **749.82** | **1497.63** | **1497.80** | **-0.17** | **0** | **11** | **1.8** | **1** | **---** | **---** | **---** | **---** | **---** | **---** | **R.ELLESYIDGR.I** |
|  | 4131 | 762.91 | 1523.80 | 1523.83 | -0.03 | 0 | 7 | 15 | 3 | --- | --- | --- | --- | --- | --- | K.NFTENDLLVR.I 4126 |
|  | 5788 | 922.52 | 1843.02 | 1843.17 | -0.15 | 1 | 13 | 4.1 | 2 | --- | --- | --- | --- | --- | --- | R.DIALMKLK.K 5778 5779 5815 |
|  | 7618 | **713.96** | **2138.85** | **2138.99** | **-0.14** | **0** | **67** | **1.1e-006** | **1** | **0.491** | **1.215** | **0.977** | **0.684** | **0.365** | **1.068** | **R.GDACEGDSGGPFVMK.S** 7619 7620 |
|  | 8731 | **766.07** | **2295.18** | **2295.09** | **0.09** | **1** | **0** | **59** | **5** | **---** | **---** | **---** | **---** | **---** | **---** | **K.RGDACEGDSGGPFVMK.S** |
|  | 9832 | **827.70** | **2480.08** | **2480.27** | **-0.19** | **0** | **14** | **0.58** | **1** | **---** | **---** | **---** | **---** | **---** | **---** | **R.TFGSGEADCGLRPLFEK.K** |
|  | 10568 | **648.83** | **2591.27** | **2591.42** | **-0.14** | **0** | **52** | **0.00025** | **1** | **1.362** | **1.467** | **1.160** | **1.778** | **1.619** | **0.909** | **R.LAVTTHGLPCLAWASAQAK.A** 10569 10570 |
|  | 11621 | **708.12** | **2828.44** | **2828.62** | **-0.18** | **0** | **57** | **0.00012** | **1** | **0.831** | **1.217** | **1.159** | **1.758** | **1.478** | **1.257** | **K.GQPSVLQVVNLPIVERPVCK.D** 11620 11622 |

  


---

|  |  |
| --- | --- |
| **27.** | P01019    **Mass:** 60043    **Score:** 228    **Queries matched:** 15   **emPAI:** 0.13 |
|  | Angiotensinogen OS=Homo sapiens GN=AGT PE=1 SV=1 |

|  |  |  |  |  |  |
| --- | --- | --- | --- | --- | --- |
|  | **Quantitation:** | **Ratio** | **Weighted** | **N** | **SD(geo)** |
|  |  | **Patient1-Art/Control** | **0.754** | **4** | **1.173** |
|  |  | Patient1-Porta/Control | 0.989 | 4 | 1.309 |
|  |  | Patient1-Hepa/Control | 1.061 | 4 | 1.293 |
|  |  | Patient3-Art/Control | 1.207 | 4 | 1.433 |
|  |  | Patient3-Porta/Control | 1.428 | 4 | 1.321 |
|  |  | **Patient3-Hepa/Control** | **1.455** | **4** | **1.211** |

|  |  |  |  |  |  |  |  |  |  |  |  |  |  |  |  |  |
| --- | --- | --- | --- | --- | --- | --- | --- | --- | --- | --- | --- | --- | --- | --- | --- | --- |
|  | **Query** | **Observed** | **Mr(expt)** | **Mr(calc)** | **Delta** | **Miss** | **Score** | **Expect** | **Rank** | **Patient1-Art/Control** | **Patient1-Porta/Control** | **Patient1-Hepa/Control** | **Patient3-Art/Control** | **Patient3-Porta/Control** | **Patient3-Hepa/Control** | **Peptide** |
|  | 4417 | **533.27** | **1596.79** | **1596.93** | **-0.14** | **1** | **15** | **1.9** | **1** | **---** | **---** | **---** | **---** | **---** | **---** | **K.LDTEDKLR.A** |
|  | 5726 | **611.97** | **1832.88** | **1832.96** | **-0.08** | **0** | **(10)** | **4.2** | **1** | **---** | **---** | **---** | **---** | **---** | **---** | **R.AAMVGMLANFLGFR.I** 5727 |
|  | 6011 | **626.36** | **1876.04** | **1876.16** | **-0.12** | **0** | **18** | **1.2** | **1** | **---** | **---** | **---** | **---** | **---** | **---** | **K.ALQDQLVLVAAK.L** |
|  | 6815 | **676.40** | **2026.17** | **2026.22** | **-0.05** | **0** | **105** | **2.2e-009** | **1** | **0.872** | **0.656** | **1.754** | **2.457** | **0.866** | **1.238** | **K.VLSALQAVQGLLVAQGR.A** 6817 |
|  | 6940 | **682.69** | **2045.04** | **2045.11** | **-0.07** | **0** | **64** | **2e-005** | **1** | **0.789** | **0.847** | **0.844** | **0.970** | **1.521** | **1.377** | **R.SLDFTELDVAAEK.I** 6936 6937 6938 6939 6942 6944 |
|  | 8212 | **734.74** | **2201.20** | **2201.29** | **-0.09** | **0** | **28** | **0.1** | **1** | **---** | **---** | **---** | **---** | **---** | **---** | **K.QPFVQGLALYTPVVLPR.S** 8211 |

  


---

|  |  |
| --- | --- |
| **28.** | P0C0L4    **Mass:** 217666   **Score:** 169    **Queries matched:** 44   **emPAI:** 0.09 |
|  | Complement C4-A OS=Homo sapiens GN=C4A PE=1 SV=1 |

|  |  |  |  |  |  |
| --- | --- | --- | --- | --- | --- |
|  | **Quantitation:** | **Ratio** | **Weighted** | **N** | **SD(geo)** |
|  |  | Patient1-Art/Control | --- | 2 | --- |
|  |  | Patient1-Porta/Control | 0.847 | 3 | 1.163 |
|  |  | Patient1-Hepa/Control | 0.825 | 3 | 1.501 |
|  |  | Patient3-Art/Control | 1.411 | 3 | 1.750 |
|  |  | Patient3-Porta/Control | 1.340 | 3 | 1.565 |
|  |  | **Patient3-Hepa/Control** | **1.554** | **3** | **1.143** |

|  |  |  |  |  |  |  |  |  |  |  |  |  |  |  |  |  |
| --- | --- | --- | --- | --- | --- | --- | --- | --- | --- | --- | --- | --- | --- | --- | --- | --- |
|  | **Query** | **Observed** | **Mr(expt)** | **Mr(calc)** | **Delta** | **Miss** | **Score** | **Expect** | **Rank** | **Patient1-Art/Control** | **Patient1-Porta/Control** | **Patient1-Hepa/Control** | **Patient3-Art/Control** | **Patient3-Porta/Control** | **Patient3-Hepa/Control** | **Peptide** |
|  | 888 | **491.75** | **981.48** | **981.59** | **-0.11** | **0** | **22** | **1.1** | **1** | **---** | **---** | **---** | **---** | **---** | **---** | **K.GSVFLR.N** 895 |
|  | 974 | **498.26** | **994.50** | **994.59** | **-0.08** | **0** | **14** | **1** | **1** | **---** | **---** | **---** | **---** | **---** | **---** | **R.IQQFR.K** 978 979 982 983 984 |
|  | 2369 | 601.34 | 1200.66 | 1200.68 | -0.02 | 0 | 10 | 5.2 | 2 | --- | --- | --- | --- | --- | --- | R.LSCPK.E 2359 2360 2361 2363 2371 |
|  | 3124 | **669.38** | **1336.74** | **1336.85** | **-0.12** | **0** | **12** | **4.4** | **1** | **---** | **---** | **---** | **---** | **---** | **---** | **K.VLQIEK.E** |
|  | 3631 | **714.86** | **1427.71** | **1427.86** | **-0.15** | **0** | **24** | **0.24** | **1** | **---** | **---** | **---** | **---** | **---** | **---** | **R.VFALDQK.M** 3644 3650 |
|  | 4863 | **565.67** | **1693.99** | **1694.03** | **-0.05** | **0** | **18** | **1.1** | **1** | **---** | **---** | **---** | **---** | **---** | **---** | **K.ITQVLHFTK.D** |
|  | 5038 | **573.00** | **1715.97** | **1716.01** | **-0.03** | **0** | **43** | **0.004** | **1** | **1.443** | **0.761** | **0.635** | **1.551** | **1.305** | **1.622** | **K.YVLPNFEVK.I** |
|  | 6030 | **628.67** | **1882.98** | **1883.03** | **-0.05** | **0** | **24** | **0.24** | **1** | **---** | **---** | **---** | **---** | **---** | **---** | **R.EMSGSPASGIPVK.V** |
|  | 6342 | **645.71** | **1934.11** | **1934.18** | **-0.07** | **0** | **75** | **2.1e-006** | **1** | **-0.013** | **1.075** | **1.772** | **1.646** | **2.174** | **1.184** | **R.HLVPGAPFLLQALVR.E** |
|  | 6911 | **682.35** | **2044.02** | **2044.13** | **-0.11** | **0** | **24** | **0.21** | **1** | **---** | **---** | **---** | **---** | **---** | **---** | **R.GLEEELQFSLGSK.I** 6894 6895 6896 6897 6899 6900 6902 6905 6907 6914 6921 6923 6924 6925 6930 |
|  | 7954 | 725.40 | 2173.17 | 2173.10 | 0.07 | 2 | 1 | 56 | 5 | --- | --- | --- | --- | --- | --- | K.AAANQMRNFLVRASCR.L |
|  | 11415 | **929.84** | **2786.51** | **2786.50** | **0.01** | **0** | **81** | **5.5e-007** | **1** | **0.430** | **1.064** | **0.863** | **0.454** | **0.682** | **1.571** | **R.VTASDPLDTLGSEGALSPGGVASLLR.L** 11408 11412 11414 11416 |

  

|  |  |
| --- | --- |
|  | |
|  | **Proteins matching the same set of peptides:** |

|  |  |
| --- | --- |
|  | P0C0L5    **Mass:** 217642   **Score:** 169    **Queries matched:** 44 |
|  | Complement C4-B OS=Homo sapiens GN=C4B PE=1 SV=1 |

---

|  |  |
| --- | --- |
| **29.** | P01008    **Mass:** 64497    **Score:** 156    **Queries matched:** 34   **emPAI:** 0.40 |
|  | Antithrombin-III OS=Homo sapiens GN=SERPINC1 PE=1 SV=1 |

|  |  |  |  |  |  |
| --- | --- | --- | --- | --- | --- |
|  | **Quantitation:** | **Ratio** | **Weighted** | **N** | **SD(geo)** |
|  |  | Patient1-Art/Control | 1.069 | 5 | 1.592 |
|  |  | Patient1-Porta/Control | 0.891 | 7 | 1.540 |
|  |  | Patient1-Hepa/Control | 1.116 | 5 | 1.417 |
|  |  | Patient3-Art/Control | 1.447 | 7 | 1.651 |
|  |  | Patient3-Porta/Control | 1.177 | 7 | 1.545 |
|  |  | Patient3-Hepa/Control | 1.036 | 7 | 1.433 |

|  |  |  |  |  |  |  |  |  |  |  |  |  |  |  |  |  |
| --- | --- | --- | --- | --- | --- | --- | --- | --- | --- | --- | --- | --- | --- | --- | --- | --- |
|  | **Query** | **Observed** | **Mr(expt)** | **Mr(calc)** | **Delta** | **Miss** | **Score** | **Expect** | **Rank** | **Patient1-Art/Control** | **Patient1-Porta/Control** | **Patient1-Hepa/Control** | **Patient3-Art/Control** | **Patient3-Porta/Control** | **Patient3-Hepa/Control** | **Peptide** |
|  | 741 | **482.27** | **962.53** | **962.58** | **-0.05** | **0** | **14** | **2.2** | **1** | **---** | **---** | **---** | **---** | **---** | **---** | **K.LVSANR.L** |
|  | 1085 | 502.80 | 1003.58 | 1003.57 | 0.00 | 0 | 6 | 6.6 | 6 | --- | --- | --- | --- | --- | --- | R.SLNPNR.V |
|  | 1661 | **552.79** | **1103.57** | **1103.62** | **-0.05** | **0** | **15** | **2.4** | **1** | **---** | **---** | **---** | **---** | **---** | **---** | **K.IPEATNR.R** |
|  | 1935 | **577.79** | **1153.57** | **1153.60** | **-0.03** | **0** | **3** | **48** | **1** | **---** | **---** | **---** | **---** | **---** | **---** | **K.FSPENTR.K** |
|  | 2235 | **594.30** | **1186.58** | **1186.72** | **-0.14** | **0** | **17** | **1.5** | **1** | **---** | **---** | **---** | **---** | **---** | **---** | **R.LFGDK.S** |
|  | 2957 | **654.34** | **1306.67** | **1306.77** | **-0.11** | **0** | **12** | **2.9** | **1** | **---** | **---** | **---** | **---** | **---** | **---** | **K.ELFYK.A** |
|  | 3356 | **692.82** | **1383.62** | **1383.78** | **-0.16** | **0** | **0** | **39** | **8** | **---** | **---** | **---** | **---** | **---** | **---** | **R.VANPCVK.-** |
|  | 4082 | **506.28** | **1515.82** | **1515.88** | **-0.05** | **0** | **2** | **42** | **1** | **---** | **---** | **---** | **---** | **---** | **---** | **R.IEDGFSLK.E** |
|  | 4138 | **509.27** | **1524.79** | **1524.92** | **-0.14** | **1** | **13** | **3.1** | **1** | **---** | **---** | **---** | **---** | **---** | **---** | **R.RVWELSK.A** |
|  | 4186 | **512.94** | **1535.80** | **1535.92** | **-0.12** | **0** | **35** | **0.025** | **1** | **0.847** | **0.973** | **0.896** | **1.074** | **1.190** | **1.015** | **K.ANRPFLVFIR.E** |
|  | 5018 | **855.47** | **1708.93** | **1708.95** | **-0.02** | **0** | **14** | **2.7** | **1** | **---** | **---** | **---** | **---** | **---** | **---** | **R.EVPLNTIIFMGR.V** 5005 5006 5008 5009 5013 5017 |
|  | 5124 | **579.00** | **1733.98** | **1734.06** | **-0.08** | **1** | **37** | **0.016** | **1** | **0.901** | **0.771** | **1.192** | **1.400** | **0.898** | **1.025** | **K.SKLPGIVAEGR.D** 5121 |
|  | 6875 | **680.38** | **2038.12** | **2038.19** | **-0.08** | **0** | **21** | **0.5** | **1** | **---** | **---** | **---** | **---** | **---** | **---** | **R.VAEGTQVLELPFK.G** |
|  | 8459 | **556.28** | **2221.09** | **2221.21** | **-0.13** | **0** | **8** | **7.8** | **1** | **---** | **---** | **---** | **---** | **---** | **---** | **R.DDLYVSDAFHK.A** |
|  | 8684 | **761.75** | **2282.22** | **2282.25** | **-0.03** | **1** | **32** | **0.043** | **1** | **1.800** | **1.204** | **1.200** | **2.634** | **2.503** | **1.171** | **K.LQPLDFKENAEQSR.A** 8682 |
|  | 9810 | **825.07** | **2472.18** | **2472.30** | **-0.13** | **0** | **60** | **3.4e-005** | **1** | **2.628** | **0.949** | **-0.219** | **2.218** | **1.617** | **1.528** | **K.EQLQDMGLVDLFSPEK.S** 9811 9812 9813 9814 9815 |
|  | 10587 | **865.76** | **2594.25** | **2594.35** | **-0.10** | **0** | **0** | **42** | **1** | **---** | **---** | **---** | **---** | **---** | **---** | **K.AFLEVNEEGSEAAASTAVVIAGR.S** |
|  | 11812 | **960.79** | **2879.35** | **2879.53** | **-0.18** | **2** | **2** | **20** | **1** | **---** | **---** | **---** | **---** | **---** | **---** | **R.DIPMNPMCIYRSPEKK.A** |
|  | 12022 | **975.13** | **2922.36** | **2922.53** | **-0.16** | **0** | **35** | **0.0083** | **1** | **-0.004** | **0.357** | **0.663** | **0.716** | **0.714** | **0.452** | **K.NDNDNIFLSPLSISTAFAMTK.L** 12023 12024 |

  


---

|  |  |
| --- | --- |
| **30.** | P27169    **Mass:** 46250    **Score:** 130    **Queries matched:** 12   **emPAI:** 0.17 |
|  | Serum paraoxonase/arylesterase 1 OS=Homo sapiens GN=PON1 PE=1 SV=2 |

|  |  |  |  |  |  |
| --- | --- | --- | --- | --- | --- |
|  | **Quantitation:** | **Ratio** | **Weighted** | **N** | **SD(geo)** |
|  |  | Patient1-Art/Control | 0.927 | 4 | 1.967 |
|  |  | Patient1-Porta/Control | 1.102 | 4 | 3.738 |
|  |  | Patient1-Hepa/Control | 1.302 | 3 | 3.787 |
|  |  | Patient3-Art/Control | 1.193 | 4 | 3.441 |
|  |  | Patient3-Porta/Control | 1.467 | 4 | 4.935 |
|  |  | Patient3-Hepa/Control | 1.535 | 4 | 4.837 |

|  |  |  |  |  |  |  |  |  |  |  |  |  |  |  |  |  |
| --- | --- | --- | --- | --- | --- | --- | --- | --- | --- | --- | --- | --- | --- | --- | --- | --- |
|  | **Query** | **Observed** | **Mr(expt)** | **Mr(calc)** | **Delta** | **Miss** | **Score** | **Expect** | **Rank** | **Patient1-Art/Control** | **Patient1-Porta/Control** | **Patient1-Hepa/Control** | **Patient3-Art/Control** | **Patient3-Porta/Control** | **Patient3-Hepa/Control** | **Peptide** |
|  | 2231 | **593.32** | **1184.63** | **1184.74** | **-0.11** | **0** | **7** | **10** | **1** | **---** | **---** | **---** | **---** | **---** | **---** | **K.YPGIK.S** |
|  | 3659 | **716.40** | **1430.78** | **1430.86** | **-0.07** | **0** | **2** | **46** | **5** | **---** | **---** | **---** | **---** | **---** | **---** | **K.STVELFK.F** |
|  | 6299 | **643.37** | **1927.09** | **1927.14** | **-0.05** | **0** | **1** | **54** | **1** | **---** | **---** | **---** | **---** | **---** | **---** | **K.YVYIAELLAHK.I** |
|  | 8491 | **746.05** | **2235.12** | **2235.22** | **-0.10** | **0** | **33** | **0.026** | **1** | **0.868** | **1.129** | **1.359** | **0.885** | **1.096** | **1.638** | **R.EVQPVELPNCNLVK.G** 8490 |
|  | 12422 | **1003.50** | **3007.49** | **3007.66** | **-0.17** | **0** | **(7)** | **9.4** | **1** | **---** | **---** | **---** | **---** | **---** | **---** | **K.ILLMDLNEEDPTVLELGITGSK.F** |
|  | 12435 | **1008.85** | **3023.53** | **3023.66** | **-0.12** | **0** | **64** | **1.8e-005** | **1** | **1.141** | **2.801** | **4.055** | **4.395** | **5.755** | **3.535** | **K.ILLMDLNEEDPTVLELGITGSK.F** 12434 12436 12438 12440 12441 |

  


---

|  |  |
| --- | --- |
| **31.** | P02656    **Mass:** 12975    **Score:** 113    **Queries matched:** 3   **emPAI:** 0.30 |
|  | Apolipoprotein C-III OS=Homo sapiens GN=APOC3 PE=1 SV=1 |

|  |  |  |  |  |  |
| --- | --- | --- | --- | --- | --- |
|  | **Quantitation:** | **Ratio** | **Weighted** | **N** | **SD(geo)** |
|  |  | Patient1-Art/Control | --- | 1 | --- |
|  |  | Patient1-Porta/Control | --- | 1 | --- |
|  |  | Patient1-Hepa/Control | --- | 1 | --- |
|  |  | Patient3-Art/Control | --- | 1 | --- |
|  |  | Patient3-Porta/Control | --- | 1 | --- |
|  |  | Patient3-Hepa/Control | --- | 1 | --- |

|  |  |  |  |  |  |  |  |  |  |  |  |  |  |  |  |  |
| --- | --- | --- | --- | --- | --- | --- | --- | --- | --- | --- | --- | --- | --- | --- | --- | --- |
|  | **Query** | **Observed** | **Mr(expt)** | **Mr(calc)** | **Delta** | **Miss** | **Score** | **Expect** | **Rank** | **Patient1-Art/Control** | **Patient1-Porta/Control** | **Patient1-Hepa/Control** | **Patient3-Art/Control** | **Patient3-Porta/Control** | **Patient3-Hepa/Control** | **Peptide** |
|  | 6799 | **674.34** | **2019.98** | **2020.05** | **-0.06** | **0** | **64** | **1.9e-005** | **1** | **###** | **###** | **###** | **###** | **###** | **---** | **K.DALSSVQESQVAQQAR.G** 6797 6800 |

  


---

|  |  |
| --- | --- |
| **32.** | P10909    **Mass:** 62047    **Score:** 103    **Queries matched:** 14   **emPAI:** 0.26 |
|  | Clusterin OS=Homo sapiens GN=CLU PE=1 SV=1 |

|  |  |  |  |  |  |
| --- | --- | --- | --- | --- | --- |
|  | **Quantitation:** | **Ratio** | **Weighted** | **N** | **SD(geo)** |
|  |  | Patient1-Art/Control | 1.236 | 4 | 1.196 |
|  |  | Patient1-Porta/Control | 1.239 | 4 | 1.216 |
|  |  | **Patient1-Hepa/Control** | **1.188** | **3** | **1.049** |
|  |  | Patient3-Art/Control | 1.595 | 4 | 1.362 |
|  |  | **Patient3-Porta/Control** | **1.543** | **3** | **1.071** |
|  |  | Patient3-Hepa/Control | 1.366 | 4 | 1.382 |

|  |  |  |  |  |  |  |  |  |  |  |  |  |  |  |  |  |
| --- | --- | --- | --- | --- | --- | --- | --- | --- | --- | --- | --- | --- | --- | --- | --- | --- |
|  | **Query** | **Observed** | **Mr(expt)** | **Mr(calc)** | **Delta** | **Miss** | **Score** | **Expect** | **Rank** | **Patient1-Art/Control** | **Patient1-Porta/Control** | **Patient1-Hepa/Control** | **Patient3-Art/Control** | **Patient3-Porta/Control** | **Patient3-Hepa/Control** | **Peptide** |
|  | 2473 | **606.30** | **1210.59** | **1210.77** | **-0.18** | **0** | **12** | **4.1** | **1** | **---** | **---** | **---** | **---** | **---** | **---** | **K.TLIEK.T** |
|  | 3039 | **660.31** | **1318.60** | **1318.75** | **-0.15** | **0** | **1** | **31** | **1** | **---** | **---** | **---** | **---** | **---** | **---** | **K.SYQWK.M** |
|  | 4888 | **849.37** | **1696.73** | **1696.89** | **-0.17** | **0** | **56** | **5.6e-005** | **1** | **1.693** | **1.511** | **1.544** | **2.091** | **1.717** | **2.008** | **R.ASSIIDELFQDR.F** 4889 4890 4891 4892 |
|  | 5060 | **576.00** | **1724.97** | **1725.01** | **-0.04** | **0** | **35** | **0.021** | **1** | **1.241** | **1.529** | **1.204** | **1.576** | **1.507** | **1.637** | **K.TLLSNLEEAK.K** |
|  | 7865 | **720.06** | **2157.16** | **2157.31** | **-0.16** | **1** | **42** | **0.0045** | **1** | **1.279** | **1.061** | **1.101** | **1.037** | **0.951** | **0.989** | **R.KTLLSNLEEAK.K** 7866 7867 7868 7869 7870 |

  


---

|  |  |
| --- | --- |
| **33.** | P19823    **Mass:** 126842   **Score:** 100    **Queries matched:** 48   **emPAI:** 0.06 |
|  | Inter-alpha-trypsin inhibitor heavy chain H2 OS=Homo sapiens GN=ITIH2 PE=1 SV=2 |

|  |  |  |  |  |  |
| --- | --- | --- | --- | --- | --- |
|  | **Quantitation:** | **Ratio** | **Weighted** | **N** | **SD(geo)** |
|  |  | Patient1-Art/Control | 0.932 | 3 | 1.668 |
|  |  | Patient1-Porta/Control | 1.001 | 3 | NN |
|  |  | Patient1-Hepa/Control | 0.796 | 3 | 1.849 |
|  |  | Patient3-Art/Control | 0.282 | 3 | 2.324 |
|  |  | Patient3-Porta/Control | --- | 2 | --- |
|  |  | Patient3-Hepa/Control | 1.349 | 3 | 1.309 |

|  |  |  |  |  |  |  |  |  |  |  |  |  |  |  |  |  |
| --- | --- | --- | --- | --- | --- | --- | --- | --- | --- | --- | --- | --- | --- | --- | --- | --- |
|  | **Query** | **Observed** | **Mr(expt)** | **Mr(calc)** | **Delta** | **Miss** | **Score** | **Expect** | **Rank** | **Patient1-Art/Control** | **Patient1-Porta/Control** | **Patient1-Hepa/Control** | **Patient3-Art/Control** | **Patient3-Porta/Control** | **Patient3-Hepa/Control** | **Peptide** |
|  | 1598 | **548.82** | **1095.63** | **1095.63** | **-0.00** | **0** | **3** | **50** | **2** | **---** | **---** | **---** | **---** | **---** | **---** | **R.ALYAQAR.A** |
|  | 1915 | **575.84** | **1149.67** | **1149.68** | **-0.01** | **0** | **6** | **13** | **3** | **---** | **---** | **---** | **---** | **---** | **---** | **R.IYLQPGR.L** |
|  | 7181 | **698.72** | **2093.13** | **2093.16** | **-0.03** | **0** | **2** | **42** | **1** | **---** | **---** | **---** | **---** | **---** | **---** | **K.HLEVDVWVIEPQGLR.F** |
|  | 8635 | **753.43** | **2257.27** | **2257.27** | **0.00** | **0** | **43** | **0.0034** | **1** | **0.578** | **0.942** | **0.229** | **0.304** | **0.616** | **1.252** | **R.ETAVDGELVVLYDVK.R** 8564 8565 8566 8567 8568 8569 8571 8572 8573 8574 8575 8576 8587 8592 8595 8596 8599 8604 8605 8608 8609 8610 8611 8612 8613 8620 8623 8628 8629 8631 8632 8633 8634 8637 8638 8639 |
|  | 9406 | 805.42 | 2413.24 | 2413.37 | -0.13 | 1 | 6 | 17 | 2 | --- | --- | --- | --- | --- | --- | R.ETAVDGELVVLYDVKR.E 9407 9418 |
|  | 11687 | **713.10** | **2848.35** | **2848.54** | **-0.19** | **0** | **36** | **0.0074** | **1** | **0.930** | **0.962** | **0.833** | **0.257** | **1.439** | **1.336** | **R.FLHVPDTFEGHFDGVPVISK.G** 11688 |
|  | 12204 | **992.15** | **2973.42** | **2973.37** | **0.06** | **0** | **3** | **16** | **2** | **---** | **---** | **---** | **---** | **---** | **---** | **R.MLADAPPQDPSCCSGALYYGSK.V** 12203 12206 |

  


---

|  |  |
| --- | --- |
| **34.** | P02649    **Mass:** 40483    **Score:** 99     **Queries matched:** 26   **emPAI:** 0.56 |
|  | Apolipoprotein E OS=Homo sapiens GN=APOE PE=1 SV=1 |

|  |  |  |  |  |  |
| --- | --- | --- | --- | --- | --- |
|  | **Quantitation:** | **Ratio** | **Weighted** | **N** | **SD(geo)** |
|  |  | Patient1-Art/Control | 1.050 | 6 | 2.623 |
|  |  | Patient1-Porta/Control | 0.993 | 5 | 1.409 |
|  |  | Patient1-Hepa/Control | 0.803 | 5 | 5506.645 |
|  |  | Patient3-Art/Control | 1.313 | 5 | 2.219 |
|  |  | Patient3-Porta/Control | 1.543 | 5 | 1.804 |
|  |  | Patient3-Hepa/Control | 1.359 | 6 | 2.294 |

|  |  |  |  |  |  |  |  |  |  |  |  |  |  |  |  |  |
| --- | --- | --- | --- | --- | --- | --- | --- | --- | --- | --- | --- | --- | --- | --- | --- | --- |
|  | **Query** | **Observed** | **Mr(expt)** | **Mr(calc)** | **Delta** | **Miss** | **Score** | **Expect** | **Rank** | **Patient1-Art/Control** | **Patient1-Porta/Control** | **Patient1-Hepa/Control** | **Patient3-Art/Control** | **Patient3-Porta/Control** | **Patient3-Hepa/Control** | **Peptide** |
|  | 526 | **460.75** | **919.49** | **919.58** | **-0.09** | **0** | **24** | **0.22** | **1** | **---** | **---** | **---** | **---** | **---** | **---** | **R.GLSAIR.E** 527 531 |
|  | 900 | **491.79** | **981.57** | **981.59** | **-0.02** | **0** | **9** | **26** | **1** | **---** | **---** | **---** | **---** | **---** | **---** | **R.LVQYR.G** 897 898 |
|  | 2250 | **595.82** | **1189.62** | **1189.67** | **-0.05** | **0** | **31** | **0.03** | **1** | **0.240** | **1.030** | **0.108** | **1.558** | **0.775** | **0.879** | **K.ELQAAQAR.L** 2252 2253 |
|  | 2640 | **626.83** | **1251.64** | **1251.72** | **-0.08** | **0** | **38** | **0.012** | **1** | **1.559** | **0.891** | **-0.151** | **1.158** | **2.143** | **1.614** | **R.LAVYQAGAR.E** 2641 2642 |
|  | 3121 | **669.34** | **1336.66** | **1336.74** | **-0.08** | **0** | **35** | **0.018** | **1** | **1.453** | **1.202** | **1.086** | **1.869** | **1.823** | **1.914** | **R.LQAEAFQAR.L** 3119 3120 3122 3123 |
|  | 4289 | **521.59** | **1561.75** | **1561.83** | **-0.08** | **0** | **1** | **39** | **10** | **---** | **---** | **---** | **---** | **---** | **---** | **R.ALMDETMK.E** |
|  | 6251 | **641.33** | **1920.97** | **1921.12** | **-0.15** | **1** | **29** | **0.066** | **1** | **---** | **---** | **---** | **---** | **---** | **---** | **R.AKLEEQAQQIR.L** 6253 6255 |
|  | 8534 | **751.71** | **2252.10** | **2252.25** | **-0.15** | **1** | **0** | **43** | **6** | **---** | **---** | **---** | **---** | **---** | **---** | **R.ALMDETMKELK.A** |
|  | 8719 | **574.30** | **2293.16** | **2293.29** | **-0.13** | **2** | **14** | **2.4** | **1** | **---** | **---** | **---** | **---** | **---** | **---** | **R.DRLDEVKEQVAEVR.A** |
|  | 11075 | **901.14** | **2700.40** | **2700.44** | **-0.05** | **1** | **21** | **0.5** | **1** | **---** | **---** | **---** | **---** | **---** | **---** | **K.AYKSELEEQLTPVAEETR.A** |
|  | 12449 | **1012.14** | **3033.40** | **3033.59** | **-0.19** | **0** | **53** | **0.00012** | **1** | **0.497** | **0.586** | **1.041** | **0.374** | **0.829** | **0.515** | **R.WVQTLSEQVQEELLSSQVTQELR.A** 12450 |

  


---

|  |  |
| --- | --- |
| **35.** | Q14624    **Mass:** 116254   **Score:** 95     **Queries matched:** 29   **emPAI:** 0.21 |
|  | Inter-alpha-trypsin inhibitor heavy chain H4 OS=Homo sapiens GN=ITIH4 PE=1 SV=4 |

|  |  |  |  |  |  |
| --- | --- | --- | --- | --- | --- |
|  | **Quantitation:** | **Ratio** | **Weighted** | **N** | **SD(geo)** |
|  |  | Patient1-Art/Control | 0.768 | 3 | 1.170 |
|  |  | Patient1-Porta/Control | 0.817 | 3 | 1.434 |
|  |  | Patient1-Hepa/Control | 1.064 | 3 | 1.309 |
|  |  | Patient3-Art/Control | 1.110 | 3 | 1.451 |
|  |  | Patient3-Porta/Control | 0.761 | 3 | 1.262 |
|  |  | Patient3-Hepa/Control | 1.456 | 3 | 1.184 |

|  |  |  |  |  |  |  |  |  |  |  |  |  |  |  |  |  |
| --- | --- | --- | --- | --- | --- | --- | --- | --- | --- | --- | --- | --- | --- | --- | --- | --- |
|  | **Query** | **Observed** | **Mr(expt)** | **Mr(calc)** | **Delta** | **Miss** | **Score** | **Expect** | **Rank** | **Patient1-Art/Control** | **Patient1-Porta/Control** | **Patient1-Hepa/Control** | **Patient3-Art/Control** | **Patient3-Porta/Control** | **Patient3-Hepa/Control** | **Peptide** |
|  | 1391 | **526.77** | **1051.52** | **1051.55** | **-0.03** | **0** | **12** | **3** | **1** | **---** | **---** | **---** | **---** | **---** | **---** | **R.LCVDPR.H** 1390 |
|  | 2192 | **591.36** | **1180.70** | **1180.76** | **-0.06** | **0** | **20** | **0.61** | **1** | **---** | **---** | **---** | **---** | **---** | **---** | **R.EALIK.I** 2180 2181 2183 2185 2187 2189 2199 2202 2203 |
|  | 2563 | **616.81** | **1231.61** | **1231.71** | **-0.10** | **0** | **26** | **0.12** | **1** | **---** | **---** | **---** | **---** | **---** | **---** | **K.ILDDLSPR.D** 2565 |
|  | 4359 | **525.96** | **1574.86** | **1575.01** | **-0.15** | **0** | **14** | **2.5** | **1** | **---** | **---** | **---** | **---** | **---** | **---** | **K.VRPQQLVK.H** |
|  | 4382 | **528.60** | **1582.77** | **1582.86** | **-0.09** | **0** | **9** | **7** | **1** | **---** | **---** | **---** | **---** | **---** | **---** | **R.MNFRPGVLSSR.Q** |
|  | 4687 | **552.69** | **1655.04** | **1655.05** | **-0.00** | **0** | **18** | **1.1** | **1** | **---** | **---** | **---** | **---** | **---** | **---** | **R.LGVYELLLK.V** |
|  | 5227 | **584.99** | **1751.94** | **1752.02** | **-0.08** | **0** | **37** | **0.014** | **1** | **1.097** | **0.463** | **1.636** | **0.441** | **0.568** | **1.253** | **R.GPDVLTATVSGK.L** 5230 |
|  | 5629 | **604.69** | **1811.05** | **1811.15** | **-0.10** | **1** | **9** | **7.7** | **2** | **---** | **---** | **---** | **---** | **---** | **---** | **R.RLGVYELLLK.V** |
|  | 7255 | **706.37** | **2116.08** | **2116.28** | **-0.20** | **0** | **12** | **3.6** | **1** | **---** | **---** | **---** | **---** | **---** | **---** | **R.FKPTLSQQQK.S** 7254 7256 |
|  | 9029 | **777.71** | **2330.12** | **2330.24** | **-0.12** | **0** | **48** | **0.00059** | **1** | **0.736** | **1.364** | **1.486** | **1.083** | **1.112** | **1.977** | **R.ANTVQEATFQMELPK.K** 9024 |
|  | 9849 | **622.83** | **2487.27** | **2487.30** | **-0.03** | **0** | **19** | **0.73** | **1** | **---** | **---** | **---** | **---** | **---** | **---** | **R.QLGLPGPPDVPDHAAYHPFR.R** |
|  | 11931 | **966.48** | **2896.43** | **2896.57** | **-0.14** | **0** | **23** | **0.23** | **1** | **---** | **---** | **---** | **---** | **---** | **---** | **R.LPEGSVSLIILLTDGDPTVGETNPR.S** |
|  | 14133 | **950.95** | **3799.76** | **3799.87** | **-0.11** | **0** | **11** | **1.7** | **1** | **---** | **---** | **---** | **---** | **---** | **---** | **R.SFAAGIQALGGTNINDAMLMAVQLLDSSNQEER.L** 14131 |

  


---

|  |  |
| --- | --- |
| **36.** | P04264    **Mass:** 74959    **Score:** 94     **Queries matched:** 2   **emPAI:** 0.05 |
|  | Keratin, type II cytoskeletal 1 OS=Homo sapiens GN=KRT1 PE=1 SV=6 |

|  |  |  |  |  |  |
| --- | --- | --- | --- | --- | --- |
|  | **Quantitation:** | **Ratio** | **Weighted** | **N** | **SD(geo)** |
|  |  | Patient1-Art/Control | --- | 1 | --- |
|  |  | Patient1-Porta/Control | --- | 2 | --- |
|  |  | Patient1-Hepa/Control | --- | 2 | --- |
|  |  | Patient3-Art/Control | --- | 2 | --- |
|  |  | Patient3-Porta/Control | --- | 2 | --- |
|  |  | Patient3-Hepa/Control | --- | 2 | --- |

|  |  |  |  |  |  |  |  |  |  |  |  |  |  |  |  |  |
| --- | --- | --- | --- | --- | --- | --- | --- | --- | --- | --- | --- | --- | --- | --- | --- | --- |
|  | **Query** | **Observed** | **Mr(expt)** | **Mr(calc)** | **Delta** | **Miss** | **Score** | **Expect** | **Rank** | **Patient1-Art/Control** | **Patient1-Porta/Control** | **Patient1-Hepa/Control** | **Patient3-Art/Control** | **Patient3-Porta/Control** | **Patient3-Hepa/Control** | **Peptide** |
|  | 6178 | **637.66** | **1909.97** | **1910.12** | **-0.15** | **0** | **62** | **3.2e-005** | **1** | **1.083** | **1.159** | **0.802** | **1.323** | **0.772** | **0.905** | **R.SLDLDSIIAEVK.A** 6179 |

  


---

|  |  |
| --- | --- |
| **37.** | P05156    **Mass:** 80993    **Score:** 89     **Queries matched:** 6   **emPAI:** 0.05 |
|  | Complement factor I OS=Homo sapiens GN=CFI PE=1 SV=1 |

|  |  |  |  |  |  |
| --- | --- | --- | --- | --- | --- |
|  | **Quantitation:** | **Ratio** | **Weighted** | **N** | **SD(geo)** |
|  |  | Patient1-Art/Control | 0.859 | 3 | 1.214 |
|  |  | Patient1-Porta/Control | 1.125 | 3 | 1.554 |
|  |  | **Patient1-Hepa/Control** | **1.508** | **3** | **1.041** |
|  |  | Patient3-Art/Control | 0.870 | 3 | 2.078 |
|  |  | Patient3-Porta/Control | 1.006 | 3 | 2.310 |
|  |  | Patient3-Hepa/Control | 1.205 | 3 | 1.492 |

|  |  |  |  |  |  |  |  |  |  |  |  |  |  |  |  |  |
| --- | --- | --- | --- | --- | --- | --- | --- | --- | --- | --- | --- | --- | --- | --- | --- | --- |
|  | **Query** | **Observed** | **Mr(expt)** | **Mr(calc)** | **Delta** | **Miss** | **Score** | **Expect** | **Rank** | **Patient1-Art/Control** | **Patient1-Porta/Control** | **Patient1-Hepa/Control** | **Patient3-Art/Control** | **Patient3-Porta/Control** | **Patient3-Hepa/Control** | **Peptide** |
|  | 3439 | **466.95** | **1397.83** | **1397.77** | **0.06** | **1** | **1** | **55** | **2** | **---** | **---** | **---** | **---** | **---** | **---** | **R.EKDNER.V** |
|  | 4000 | **751.93** | **1501.84** | **1501.82** | **0.02** | **0** | **4** | **27** | **3** | **---** | **---** | **---** | **---** | **---** | **---** | **K.LPYQCPK.N** |
|  | 6974 | **685.33** | **2052.96** | **2053.07** | **-0.11** | **0** | **50** | **0.00038** | **1** | **0.748** | **0.773** | **1.556** | **0.877** | **0.560** | **1.347** | **R.GLETSLAECTFTK.R** 6973 6978 |
|  | 12274 | **998.52** | **2992.53** | **2992.39** | **0.14** | **0** | **2** | **39** | **1** | **---** | **---** | **---** | **---** | **---** | **---** | **K.DASGITCGGIYIGGCWILTAAHCLR.A** |

  


---

|  |  |
| --- | --- |
| **38.** | P02749    **Mass:** 48761    **Score:** 88     **Queries matched:** 12   **emPAI:** 0.68 |
|  | Beta-2-glycoprotein 1 OS=Homo sapiens GN=APOH PE=1 SV=3 |

|  |  |  |  |  |  |
| --- | --- | --- | --- | --- | --- |
|  | **Quantitation:** | **Ratio** | **Weighted** | **N** | **SD(geo)** |
|  |  | Patient1-Art/Control | 0.773 | 5 | 1.241 |
|  |  | Patient1-Porta/Control | 0.984 | 5 | 1.378 |
|  |  | Patient1-Hepa/Control | 0.754 | 6 | 1.509 |
|  |  | **Patient3-Art/Control** | **1.220** | **6** | **1.300** |
|  |  | **Patient3-Porta/Control** | **1.267** | **6** | **1.313** |
|  |  | Patient3-Hepa/Control | 1.007 | 6 | 1.266 |

|  |  |  |  |  |  |  |  |  |  |  |  |  |  |  |  |  |
| --- | --- | --- | --- | --- | --- | --- | --- | --- | --- | --- | --- | --- | --- | --- | --- | --- |
|  | **Query** | **Observed** | **Mr(expt)** | **Mr(calc)** | **Delta** | **Miss** | **Score** | **Expect** | **Rank** | **Patient1-Art/Control** | **Patient1-Porta/Control** | **Patient1-Hepa/Control** | **Patient3-Art/Control** | **Patient3-Porta/Control** | **Patient3-Hepa/Control** | **Peptide** |
|  | 786 | **484.27** | **966.52** | **966.49** | **0.02** | **0** | **6** | **27** | **1** | **---** | **---** | **---** | **---** | **---** | **---** | **K.LPECR.E** 781 782 |
|  | 3073 | **663.84** | **1325.66** | **1325.72** | **-0.07** | **0** | **35** | **0.022** | **1** | **0.703** | **0.248** | **0.232** | **2.393** | **1.036** | **2.254** | **K.ATVVYQGER.V** |
|  | 3356 | 692.82 | 1383.62 | 1383.75 | -0.13 | 0 | 29 | 0.054 | 1 | 0.616 | 0.988 | 0.639 | 1.134 | 1.084 | 1.042 | K.VSFFCK.N |
|  | 4409 | **530.61** | **1588.80** | **1588.81** | **-0.00** | **0** | **19** | **0.88** | **1** | **---** | **---** | **---** | **---** | **---** | **---** | **K.TDASDVKPC.-** |
|  | 9158 | **790.77** | **2369.30** | **2369.35** | **-0.05** | **0** | **39** | **0.0088** | **1** | **-0.033** | **2.927** | **0.579** | **2.929** | **2.447** | **1.180** | **K.FICPLTGLWPINTLK.C** |
|  | 10982 | **891.38** | **2671.13** | **2671.25** | **-0.12** | **0** | **4** | **3.1** | **1** | **---** | **---** | **---** | **---** | **---** | **---** | **K.CSYTEDAQCIDGTIEVPK.C** |
|  | 11519 | **701.40** | **2801.55** | **2801.65** | **-0.09** | **1** | **44** | **0.0027** | **1** | **1.246** | **1.375** | **1.446** | **1.883** | **2.788** | **0.807** | **R.KFICPLTGLWPINTLK.C** |
|  | 11567 | **704.60** | **2814.39** | **2814.58** | **-0.19** | **0** | **29** | **0.056** | **1** | **0.821** | **0.910** | **0.769** | **1.275** | **1.519** | **0.836** | **R.TCPKPDDLPFSTVVPLK.T** 11568 |
|  | 12242 | **745.83** | **2979.30** | **2979.46** | **-0.16** | **0** | **29** | **0.016** | **1** | **1.306** | **0.962** | **1.204** | **1.100** | **1.173** | **1.121** | **K.TFYEPGEEITYSCKPGYVSR.G** |

  


---

|  |  |
| --- | --- |
| **39.** | P10643    **Mass:** 110939   **Score:** 62     **Queries matched:** 11   **emPAI:** 0.07 |
|  | Complement component C7 OS=Homo sapiens GN=C7 PE=1 SV=2 |

|  |  |  |  |  |  |
| --- | --- | --- | --- | --- | --- |
|  | **Quantitation:** | **Ratio** | **Weighted** | **N** | **SD(geo)** |
|  |  | Patient1-Art/Control | --- | 1 | --- |
|  |  | Patient1-Porta/Control | --- | 1 | --- |
|  |  | Patient1-Hepa/Control | --- | 1 | --- |
|  |  | Patient3-Art/Control | --- | 1 | --- |
|  |  | Patient3-Porta/Control | --- | 1 | --- |
|  |  | Patient3-Hepa/Control | --- | 1 | --- |

|  |  |  |  |  |  |  |  |  |  |  |  |  |  |  |  |  |
| --- | --- | --- | --- | --- | --- | --- | --- | --- | --- | --- | --- | --- | --- | --- | --- | --- |
|  | **Query** | **Observed** | **Mr(expt)** | **Mr(calc)** | **Delta** | **Miss** | **Score** | **Expect** | **Rank** | **Patient1-Art/Control** | **Patient1-Porta/Control** | **Patient1-Hepa/Control** | **Patient3-Art/Control** | **Patient3-Porta/Control** | **Patient3-Hepa/Control** | **Peptide** |
|  | 1243 | 511.76 | 1021.50 | 1021.59 | -0.09 | 0 | 11 | 3.4 | 9 | --- | --- | --- | --- | --- | --- | R.GEPFIR.G 1248 |
|  | 4361 | **526.32** | **1575.93** | **1576.05** | **-0.12** | **1** | **4** | **23** | **1** | **---** | **---** | **---** | **---** | **---** | **---** | **K.KLYLK.W** |
|  | 4809 | **562.02** | **1683.03** | **1683.04** | **-0.02** | **0** | **22** | **0.44** | **1** | **---** | **---** | **---** | **---** | **---** | **---** | **K.LTPLYELVK.E** 4808 4810 |
|  | 9421 | **805.44** | **2413.31** | **2413.35** | **-0.04** | **0** | **2** | **39** | **5** | **---** | **---** | **---** | **---** | **---** | **---** | **R.YSAWAESVTNLPQVIK.Q** |
|  | 13273 | **834.66** | **3334.62** | **3334.75** | **-0.13** | **0** | **63** | **2e-005** | **1** | **1.373** | **1.273** | **0.785** | **1.409** | **1.428** | **1.086** | **R.LLEPHCFPLSLVPTEFCPSPPALK.D** 13272 13275 |
|  | 14747 | **882.07** | **4405.29** | **4405.35** | **-0.06** | **2** | **1** | **37** | **3** | **---** | **---** | **---** | **---** | **---** | **---** | **R.RLIDQYGTHYLQSGSLGGEYRVLFYVDSEK.L** |

  


---

|  |  |
| --- | --- |
| **40.** | P02760    **Mass:** 45490    **Score:** 60     **Queries matched:** 7   **emPAI:** 0.08 |
|  | Protein AMBP OS=Homo sapiens GN=AMBP PE=1 SV=1 |

|  |  |  |  |  |  |
| --- | --- | --- | --- | --- | --- |
|  | **Quantitation:** | **Ratio** | **Weighted** | **N** | **SD(geo)** |
|  |  | Patient1-Art/Control | --- | 1 | --- |
|  |  | Patient1-Porta/Control | --- | 1 | --- |
|  |  | Patient1-Hepa/Control | --- | 1 | --- |
|  |  | Patient3-Art/Control | --- | 1 | --- |
|  |  | Patient3-Porta/Control | --- | 1 | --- |
|  |  | Patient3-Hepa/Control | --- | 1 | --- |

|  |  |  |  |  |  |  |  |  |  |  |  |  |  |  |  |  |
| --- | --- | --- | --- | --- | --- | --- | --- | --- | --- | --- | --- | --- | --- | --- | --- | --- |
|  | **Query** | **Observed** | **Mr(expt)** | **Mr(calc)** | **Delta** | **Miss** | **Score** | **Expect** | **Rank** | **Patient1-Art/Control** | **Patient1-Porta/Control** | **Patient1-Hepa/Control** | **Patient3-Art/Control** | **Patient3-Porta/Control** | **Patient3-Hepa/Control** | **Peptide** |
|  | 6784 | **673.04** | **2016.09** | **2016.17** | **-0.07** | **0** | **60** | **7.5e-005** | **1** | **2.637** | **0.937** | **0.704** | **2.986** | **1.113** | **0.892** | **R.AFIQLWAFDAVK.G** 6781 6783 |
|  | 8800 | **577.27** | **2305.07** | **2305.12** | **-0.05** | **0** | **19** | **0.44** | **1** | **---** | **---** | **---** | **---** | **---** | **---** | **R.EYCGVPGDGDEELLR.F** 8799 8803 8804 |

  


---

|  |  |
| --- | --- |
| **41.** | P25311    **Mass:** 40423    **Score:** 59     **Queries matched:** 3   **emPAI:** 0.09 |
|  | Zinc-alpha-2-glycoprotein OS=Homo sapiens GN=AZGP1 PE=1 SV=1 |

|  |  |  |  |  |  |
| --- | --- | --- | --- | --- | --- |
|  | **Quantitation:** | **Ratio** | **Weighted** | **N** | **SD(geo)** |
|  |  | Patient1-Art/Control | --- | 1 | --- |
|  |  | Patient1-Porta/Control | --- | 1 | --- |
|  |  | Patient1-Hepa/Control | --- | 1 | --- |
|  |  | Patient3-Art/Control | --- | 1 | --- |
|  |  | Patient3-Porta/Control | --- | 1 | --- |
|  |  | Patient3-Hepa/Control | --- | 1 | --- |

|  |  |  |  |  |  |  |  |  |  |  |  |  |  |  |  |  |
| --- | --- | --- | --- | --- | --- | --- | --- | --- | --- | --- | --- | --- | --- | --- | --- | --- |
|  | **Query** | **Observed** | **Mr(expt)** | **Mr(calc)** | **Delta** | **Miss** | **Score** | **Expect** | **Rank** | **Patient1-Art/Control** | **Patient1-Porta/Control** | **Patient1-Hepa/Control** | **Patient3-Art/Control** | **Patient3-Porta/Control** | **Patient3-Hepa/Control** | **Peptide** |
|  | 6537 | **659.68** | **1976.03** | **1976.09** | **-0.06** | **1** | **1** | **53** | **4** | **---** | **---** | **---** | **---** | **---** | **---** | **K.AREDIFMETLK.D** 6534 |
|  | 11092 | **903.12** | **2706.34** | **2706.41** | **-0.06** | **0** | **59** | **5.4e-005** | **1** | **1.403** | **1.094** | **1.387** | **1.430** | **1.281** | **1.252** | **K.HVEDVPAFQALGSLNDLQFFR.Y** |

  


---

|  |  |
| --- | --- |
| **42.** | P02751    **Mass:** 289372   **Score:** 58     **Queries matched:** 10   **emPAI:** 0.03 |
|  | Fibronectin OS=Homo sapiens GN=FN1 PE=1 SV=3 |

|  |  |  |  |  |  |
| --- | --- | --- | --- | --- | --- |
|  | **Quantitation:** | **Ratio** | **Weighted** | **N** | **SD(geo)** |
|  |  | Patient1-Art/Control | --- | 2 | --- |
|  |  | Patient1-Porta/Control | --- | 2 | --- |
|  |  | Patient1-Hepa/Control | --- | 2 | --- |
|  |  | Patient3-Art/Control | --- | 2 | --- |
|  |  | Patient3-Porta/Control | --- | 2 | --- |
|  |  | Patient3-Hepa/Control | --- | 2 | --- |

|  |  |  |  |  |  |  |  |  |  |  |  |  |  |  |  |  |
| --- | --- | --- | --- | --- | --- | --- | --- | --- | --- | --- | --- | --- | --- | --- | --- | --- |
|  | **Query** | **Observed** | **Mr(expt)** | **Mr(calc)** | **Delta** | **Miss** | **Score** | **Expect** | **Rank** | **Patient1-Art/Control** | **Patient1-Porta/Control** | **Patient1-Hepa/Control** | **Patient3-Art/Control** | **Patient3-Porta/Control** | **Patient3-Hepa/Control** | **Peptide** |
|  | 1489 | **538.29** | **1074.57** | **1074.63** | **-0.06** | **0** | **9** | **5.3** | **1** | **---** | **---** | **---** | **---** | **---** | **---** | **K.SEPLIGR.K** |
|  | 1541 | **543.31** | **1084.60** | **1084.62** | **-0.02** | **0** | **5** | **16** | **1** | **---** | **---** | **---** | **---** | **---** | **---** | **R.ATITGYR.I** |
|  | 3530 | 707.83 | 1413.64 | 1413.74 | -0.10 | 0 | 8 | 5.3 | 3 | --- | --- | --- | --- | --- | --- | R.STTPDITGYR.I |
|  | 6131 | **634.01** | **1899.01** | **1899.13** | **-0.12** | **0** | **30** | **0.073** | **1** | **---** | **---** | **---** | **---** | **---** | **---** | **R.GATYNIIVEALK.D** |
|  | 6143 | **634.37** | **1900.08** | **1900.08** | **0.00** | **0** | **40** | **0.0079** | **1** | **0.980** | **1.100** | **2.207** | **2.308** | **2.707** | **2.672** | **R.DLQFVEVTDVK.V** 6138 6145 |
|  | 11373 | **926.12** | **2775.32** | **2775.45** | **-0.13** | **0** | **1** | **28** | **1** | **---** | **---** | **---** | **---** | **---** | **---** | **R.ITYGETGGNSPVQEFTVPGSK.S** |
|  | 13840 | **719.56** | **3592.74** | **3592.74** | **0.00** | **1** | **2** | **22** | **1** | **---** | **---** | **---** | **---** | **---** | **---** | **R.VGDTYERPKDSMIWDCTCIGAGR.G** |
|  | 14451 | **1025.31** | **4097.22** | **4097.27** | **-0.06** | **1** | **4** | **19** | **1** | **---** | **---** | **---** | **---** | **---** | **---** | **K.EINLAPDSSSVVVSGLMVATKYEVSVYALK.D** |

  


---

|  |  |
| --- | --- |
| **43.** | P51884    **Mass:** 46590    **Score:** 57     **Queries matched:** 7   **emPAI:** 0.08 |
|  | Lumican OS=Homo sapiens GN=LUM PE=1 SV=2 |

|  |  |  |  |  |  |
| --- | --- | --- | --- | --- | --- |
|  | **Quantitation:** | **Ratio** | **Weighted** | **N** | **SD(geo)** |
|  |  | Patient1-Art/Control | --- | 2 | --- |
|  |  | Patient1-Porta/Control | --- | 2 | --- |
|  |  | Patient1-Hepa/Control | --- | 2 | --- |
|  |  | Patient3-Art/Control | --- | 2 | --- |
|  |  | Patient3-Porta/Control | --- | 2 | --- |
|  |  | Patient3-Hepa/Control | --- | 2 | --- |

|  |  |  |  |  |  |  |  |  |  |  |  |  |  |  |  |  |
| --- | --- | --- | --- | --- | --- | --- | --- | --- | --- | --- | --- | --- | --- | --- | --- | --- |
|  | **Query** | **Observed** | **Mr(expt)** | **Mr(calc)** | **Delta** | **Miss** | **Score** | **Expect** | **Rank** | **Patient1-Art/Control** | **Patient1-Porta/Control** | **Patient1-Hepa/Control** | **Patient3-Art/Control** | **Patient3-Porta/Control** | **Patient3-Hepa/Control** | **Peptide** |
|  | 10513 | **855.81** | **2564.42** | **2564.50** | **-0.08** | **0** | **55** | **0.0002** | **1** | **1.115** | **1.340** | **0.923** | **0.879** | **0.939** | **0.663** | **R.LPSGLPVSLLTLYLDNNK.I** 10509 10510 10511 10512 10514 10516 |

  


---

|  |  |
| --- | --- |
| **44.** | P02655    **Mass:** 13406    **Score:** 50     **Queries matched:** 12   **emPAI:** 1.16 |
|  | Apolipoprotein C-II OS=Homo sapiens GN=APOC2 PE=1 SV=1 |

|  |  |  |  |  |  |
| --- | --- | --- | --- | --- | --- |
|  | **Quantitation:** | **Ratio** | **Weighted** | **N** | **SD(geo)** |
|  |  | Patient1-Art/Control | --- | 0 | --- |
|  |  | Patient1-Porta/Control | --- | 0 | --- |
|  |  | Patient1-Hepa/Control | --- | 1 | --- |
|  |  | Patient3-Art/Control | --- | 1 | --- |
|  |  | Patient3-Porta/Control | --- | 1 | --- |
|  |  | Patient3-Hepa/Control | --- | 1 | --- |

|  |  |  |  |  |  |  |  |  |  |  |  |  |  |  |  |  |
| --- | --- | --- | --- | --- | --- | --- | --- | --- | --- | --- | --- | --- | --- | --- | --- | --- |
|  | **Query** | **Observed** | **Mr(expt)** | **Mr(calc)** | **Delta** | **Miss** | **Score** | **Expect** | **Rank** | **Patient1-Art/Control** | **Patient1-Porta/Control** | **Patient1-Hepa/Control** | **Patient3-Art/Control** | **Patient3-Porta/Control** | **Patient3-Hepa/Control** | **Peptide** |
|  | 4598 | **822.45** | **1642.89** | **1642.94** | **-0.05** | **0** | **24** | **0.31** | **1** | **---** | **---** | **---** | **---** | **---** | **---** | **K.TYLPAVDEK.L** 4597 |
|  | 4637 | **549.32** | **1644.93** | **1644.93** | **0.00** | **0** | **14** | **2.8** | **1** | **---** | **---** | **---** | **---** | **---** | **---** | **K.TAAQNLYEK.T** |
|  | 11716 | **953.13** | **2856.38** | **2856.54** | **-0.16** | **0** | **41** | **0.0029** | **1** | **0.000** | **-0.040** | **2.750** | **0.501** | **1.752** | **3.982** | **K.STAAMSTYTGIFTDQVLSVLK.G** 11719 11721 11722 11723 11729 11733 11734 11735 |

  


---

|  |  |
| --- | --- |
| **45.** | P04003    **Mass:** 79292    **Score:** 46     **Queries matched:** 6   **emPAI:** 0.05 |
|  | C4b-binding protein alpha chain OS=Homo sapiens GN=C4BPA PE=1 SV=2 |

|  |  |  |  |  |  |
| --- | --- | --- | --- | --- | --- |
|  | **Quantitation:** | **Ratio** | **Weighted** | **N** | **SD(geo)** |
|  |  | Patient1-Art/Control | --- | 2 | --- |
|  |  | Patient1-Porta/Control | --- | 2 | --- |
|  |  | Patient1-Hepa/Control | --- | 2 | --- |
|  |  | Patient3-Art/Control | --- | 2 | --- |
|  |  | Patient3-Porta/Control | --- | 2 | --- |
|  |  | Patient3-Hepa/Control | --- | 2 | --- |

|  |  |  |  |  |  |  |  |  |  |  |  |  |  |  |  |  |
| --- | --- | --- | --- | --- | --- | --- | --- | --- | --- | --- | --- | --- | --- | --- | --- | --- |
|  | **Query** | **Observed** | **Mr(expt)** | **Mr(calc)** | **Delta** | **Miss** | **Score** | **Expect** | **Rank** | **Patient1-Art/Control** | **Patient1-Porta/Control** | **Patient1-Hepa/Control** | **Patient3-Art/Control** | **Patient3-Porta/Control** | **Patient3-Hepa/Control** | **Peptide** |
|  | 5400 | **592.35** | **1774.01** | **1774.01** | **-0.00** | **0** | **36** | **0.017** | **1** | **1.339** | **0.542** | **0.731** | **1.106** | **0.876** | **1.182** | **K.LSLEIEQLELQR.D** 5401 5402 |
|  | 6988 | **686.34** | **2056.00** | **2056.06** | **-0.06** | **0** | **23** | **0.25** | **1** | **---** | **---** | **---** | **---** | **---** | **---** | **R.LMQCLPNPEDVK.M** 6985 |
|  | 8751 | **576.81** | **2303.23** | **2303.24** | **-0.01** | **0** | **13** | **3.5** | **1** | **---** | **---** | **---** | **---** | **---** | **---** | **R.GVGWSHPLPQCEIVK.C** |

  


---

|  |  |
| --- | --- |
| **46.** | P02747    **Mass:** 29896    **Score:** 43     **Queries matched:** 1   **emPAI:** 0.13 |
|  | Complement C1q subcomponent subunit C OS=Homo sapiens GN=C1QC PE=1 SV=3 |

|  |  |  |  |  |  |
| --- | --- | --- | --- | --- | --- |
|  | **Quantitation:** | **Ratio** | **Weighted** | **N** | **SD(geo)** |
|  |  | Patient1-Art/Control | --- | 1 | --- |
|  |  | Patient1-Porta/Control | --- | 1 | --- |
|  |  | Patient1-Hepa/Control | --- | 1 | --- |
|  |  | Patient3-Art/Control | --- | 1 | --- |
|  |  | Patient3-Porta/Control | --- | 1 | --- |
|  |  | Patient3-Hepa/Control | --- | 1 | --- |

|  |  |  |  |  |  |  |  |  |  |  |  |  |  |  |  |  |
| --- | --- | --- | --- | --- | --- | --- | --- | --- | --- | --- | --- | --- | --- | --- | --- | --- |
|  | **Query** | **Observed** | **Mr(expt)** | **Mr(calc)** | **Delta** | **Miss** | **Score** | **Expect** | **Rank** | **Patient1-Art/Control** | **Patient1-Porta/Control** | **Patient1-Hepa/Control** | **Patient3-Art/Control** | **Patient3-Porta/Control** | **Patient3-Hepa/Control** | **Peptide** |
|  | 3373 | **694.87** | **1387.73** | **1387.78** | **-0.05** | **0** | **43** | **0.0028** | **1** | **1.210** | **1.025** | **1.102** | **1.041** | **0.896** | **0.947** | **K.FQSVFTVTR.Q** |

  


---

|  |  |
| --- | --- |
| **47.** | A6NMB1    **Mass:** 58165    **Score:** 43     **Queries matched:** 13   **emPAI:** 0.06 |
|  | Sialic acid-binding Ig-like lectin 16 OS=Homo sapiens GN=SIGLECP16 PE=2 SV=3 |

|  |  |  |  |  |  |
| --- | --- | --- | --- | --- | --- |
|  | **Quantitation:** | **Ratio** | **Weighted** | **N** | **SD(geo)** |
|  |  | Patient1-Art/Control | 0.900 | 3 | 1.468 |
|  |  | Patient1-Porta/Control | 1.109 | 3 | 1.807 |
|  |  | Patient1-Hepa/Control | 0.975 | 3 | 2.394 |
|  |  | Patient3-Art/Control | 0.890 | 3 | 1.483 |
|  |  | Patient3-Porta/Control | 0.837 | 3 | 2.434 |
|  |  | Patient3-Hepa/Control | 0.812 | 3 | NN |

|  |  |  |  |  |  |  |  |  |  |  |  |  |  |  |  |  |
| --- | --- | --- | --- | --- | --- | --- | --- | --- | --- | --- | --- | --- | --- | --- | --- | --- |
|  | **Query** | **Observed** | **Mr(expt)** | **Mr(calc)** | **Delta** | **Miss** | **Score** | **Expect** | **Rank** | **Patient1-Art/Control** | **Patient1-Porta/Control** | **Patient1-Hepa/Control** | **Patient3-Art/Control** | **Patient3-Porta/Control** | **Patient3-Hepa/Control** | **Peptide** |
|  | 1897 | 574.83 | 1147.64 | 1147.69 | -0.05 | 0 | 34 | 0.019 | 2 | 0.695 | 0.684 | 0.479 | 0.833 | 0.292 | 0.751 | R.TVLENLR.N 1890 1892 1893 1895 1896 1899 1900 |
|  | 5502 | **599.06** | **1794.15** | **1794.07** | **0.09** | **0** | **2** | **32** | **3** | **---** | **---** | **---** | **---** | **---** | **---** | **K.ILLLCLCLILLR.V** 5492 5497 5501 |
|  | 9438 | **807.71** | **2420.10** | **2420.18** | **-0.08** | **2** | **2** | **15** | **1** | **---** | **---** | **---** | **---** | **---** | **---** | **R.DAQREDEAWYFFRVER.G** |

  


---

|  |  |
| --- | --- |
| **48.** | P00915    **Mass:** 34678    **Score:** 42     **Queries matched:** 6   **emPAI:** 0.11 |
|  | Carbonic anhydrase 1 OS=Homo sapiens GN=CA1 PE=1 SV=2 |

|  |  |  |  |  |  |
| --- | --- | --- | --- | --- | --- |
|  | **Quantitation:** | **Ratio** | **Weighted** | **N** | **SD(geo)** |
|  |  | Patient1-Art/Control | --- | 1 | --- |
|  |  | Patient1-Porta/Control | --- | 1 | --- |
|  |  | Patient1-Hepa/Control | --- | 1 | --- |
|  |  | Patient3-Art/Control | --- | 1 | --- |
|  |  | Patient3-Porta/Control | --- | 1 | --- |
|  |  | Patient3-Hepa/Control | --- | 1 | --- |

|  |  |  |  |  |  |  |  |  |  |  |  |  |  |  |  |  |
| --- | --- | --- | --- | --- | --- | --- | --- | --- | --- | --- | --- | --- | --- | --- | --- | --- |
|  | **Query** | **Observed** | **Mr(expt)** | **Mr(calc)** | **Delta** | **Miss** | **Score** | **Expect** | **Rank** | **Patient1-Art/Control** | **Patient1-Porta/Control** | **Patient1-Hepa/Control** | **Patient3-Art/Control** | **Patient3-Porta/Control** | **Patient3-Hepa/Control** | **Peptide** |
|  | 5621 | **604.37** | **1810.09** | **1810.08** | **0.00** | **0** | **42** | **0.0038** | **1** | **0.652** | **0.587** | **0.863** | **0.959** | **0.627** | **0.684** | **K.ADGLAVIGVLMK.V** 5609 5611 5614 5616 5617 |

  


---

|  |  |
| --- | --- |
| **49.** | Q2KHM9    **Mass:** 134422   **Score:** 36     **Queries matched:** 10   **emPAI:** 0.03 |
|  | Uncharacterized protein KIAA0753 OS=Homo sapiens GN=KIAA0753 PE=2 SV=2 |

|  |  |  |  |  |  |
| --- | --- | --- | --- | --- | --- |
|  | **Quantitation:** | **Ratio** | **Weighted** | **N** | **SD(geo)** |
|  |  | Patient1-Art/Control | 0.647 | 3 | 1.383 |
|  |  | **Patient1-Porta/Control** | **0.730** | **3** | **1.128** |
|  |  | Patient1-Hepa/Control | 0.876 | 3 | 1.689 |
|  |  | Patient3-Art/Control | 0.619 | 3 | 1.503 |
|  |  | Patient3-Porta/Control | 0.626 | 3 | 1.624 |
|  |  | Patient3-Hepa/Control | 0.667 | 3 | 1.301 |

|  |  |  |  |  |  |  |  |  |  |  |  |  |  |  |  |  |
| --- | --- | --- | --- | --- | --- | --- | --- | --- | --- | --- | --- | --- | --- | --- | --- | --- |
|  | **Query** | **Observed** | **Mr(expt)** | **Mr(calc)** | **Delta** | **Miss** | **Score** | **Expect** | **Rank** | **Patient1-Art/Control** | **Patient1-Porta/Control** | **Patient1-Hepa/Control** | **Patient3-Art/Control** | **Patient3-Porta/Control** | **Patient3-Hepa/Control** | **Peptide** |
|  | 1897 | 574.83 | 1147.64 | 1147.69 | -0.05 | 0 | 32 | 0.032 | 3 | 0.695 | 0.684 | 0.479 | 0.833 | 0.292 | 0.751 | K.SLLEVQR.L 1890 1892 1893 1895 1896 1899 1900 |
|  | 2030 | **580.23** | **1158.44** | **1158.63** | **-0.19** | **0** | **8** | **1.9** | **1** | **---** | **---** | **---** | **---** | **---** | **---** | **R.FEQYLR.I** |
|  | 11329 | **922.07** | **2763.18** | **2763.35** | **-0.17** | **2** | **6** | **2.5** | **1** | **---** | **---** | **---** | **---** | **---** | **---** | **K.DSPDLEIMMRRMEEMEK.Y** |

  


---

|  |  |
| --- | --- |
| **50.** | A6NMZ7    **Mass:** 294896   **Score:** 36     **Queries matched:** 16   **emPAI:** 0.01 |
|  | Collagen alpha-6(VI) chain OS=Homo sapiens GN=COL6A6 PE=1 SV=2 |

|  |  |  |  |  |  |
| --- | --- | --- | --- | --- | --- |
|  | **Quantitation:** | **Ratio** | **Weighted** | **N** | **SD(geo)** |
|  |  | Patient1-Art/Control | --- | 0 | --- |
|  |  | Patient1-Porta/Control | --- | 0 | --- |
|  |  | Patient1-Hepa/Control | --- | 0 | --- |
|  |  | Patient3-Art/Control | --- | 0 | --- |
|  |  | Patient3-Porta/Control | --- | 0 | --- |
|  |  | Patient3-Hepa/Control | --- | 0 | --- |

|  |  |  |  |  |  |  |  |  |  |  |  |  |  |  |  |  |
| --- | --- | --- | --- | --- | --- | --- | --- | --- | --- | --- | --- | --- | --- | --- | --- | --- |
|  | **Query** | **Observed** | **Mr(expt)** | **Mr(calc)** | **Delta** | **Miss** | **Score** | **Expect** | **Rank** | **Patient1-Art/Control** | **Patient1-Porta/Control** | **Patient1-Hepa/Control** | **Patient3-Art/Control** | **Patient3-Porta/Control** | **Patient3-Hepa/Control** | **Peptide** |
|  | 1603 | **548.85** | **1095.68** | **1095.70** | **-0.02** | **1** | **4** | **36** | **6** | **---** | **---** | **---** | **---** | **---** | **---** | **K.GARGK.M** |
|  | 4407 | **530.31** | **1587.91** | **1587.75** | **0.16** | **0** | **2** | **38** | **8** | **---** | **---** | **---** | **---** | **---** | **---** | **R.NMGSAEFEDIR.A** |
|  | 5450 | **596.30** | **1785.88** | **1786.07** | **-0.20** | **1** | **28** | **0.092** | **1** | **---** | **---** | **---** | **---** | **---** | **---** | **R.GEAGVKGEK.G** 5449 5452 5453 5454 5455 5456 5459 |
|  | 5704 | 912.94 | 1823.86 | 1823.91 | -0.05 | 0 | 7 | 8.4 | 4 | --- | --- | --- | --- | --- | --- | R.GLQGNDGSPGYGSVGR.K 5692 5697 5700 5712 |
|  | 9746 | **819.43** | **2455.26** | **2455.40** | **-0.14** | **0** | **1** | **45** | **1** | **---** | **---** | **---** | **---** | **---** | **---** | **R.VALLSHAPPDFLPNTQK.S** |

  


---

|  |  |
| --- | --- |
| **51.** | P00747    **Mass:** 107928   **Score:** 35     **Queries matched:** 15   **emPAI:** 0.07 |
|  | Plasminogen OS=Homo sapiens GN=PLG PE=1 SV=2 |

|  |  |  |  |  |  |
| --- | --- | --- | --- | --- | --- |
|  | **Quantitation:** | **Ratio** | **Weighted** | **N** | **SD(geo)** |
|  |  | Patient1-Art/Control | --- | 0 | --- |
|  |  | Patient1-Porta/Control | --- | 0 | --- |
|  |  | Patient1-Hepa/Control | --- | 0 | --- |
|  |  | Patient3-Art/Control | --- | 0 | --- |
|  |  | Patient3-Porta/Control | --- | 0 | --- |
|  |  | Patient3-Hepa/Control | --- | 0 | --- |

|  |  |  |  |  |  |  |  |  |  |  |  |  |  |  |  |  |
| --- | --- | --- | --- | --- | --- | --- | --- | --- | --- | --- | --- | --- | --- | --- | --- | --- |
|  | **Query** | **Observed** | **Mr(expt)** | **Mr(calc)** | **Delta** | **Miss** | **Score** | **Expect** | **Rank** | **Patient1-Art/Control** | **Patient1-Porta/Control** | **Patient1-Hepa/Control** | **Patient3-Art/Control** | **Patient3-Porta/Control** | **Patient3-Hepa/Control** | **Peptide** |
|  | 1733 | **563.32** | **1124.63** | **1124.70** | **-0.07** | **0** | **2** | **61** | **10** | **---** | **---** | **---** | **---** | **---** | **---** | **R.AGLEK.N** |
|  | 2137 | **590.33** | **1178.64** | **1178.70** | **-0.05** | **0** | **7** | **9.8** | **6** | **---** | **---** | **---** | **---** | **---** | **---** | **R.LFLEPTR.K** |
|  | 2802 | **640.91** | **1279.80** | **1279.83** | **-0.03** | **0** | **13** | **2.8** | **1** | **---** | **---** | **---** | **---** | **---** | **---** | **K.DIALLK.L** 2803 |
|  | 3345 | **691.31** | **1380.60** | **1380.68** | **-0.08** | **0** | **4** | **11** | **1** | **---** | **---** | **---** | **---** | **---** | **---** | **R.WELCDIPR.C** |
|  | 4428 | **534.92** | **1601.74** | **1601.85** | **-0.11** | **0** | **29** | **0.053** | **1** | **---** | **---** | **---** | **---** | **---** | **---** | **R.HSIFTPETNPR.A** 4427 |
|  | 4581 | **546.98** | **1637.93** | **1637.98** | **-0.05** | **0** | **15** | **1.8** | **1** | **---** | **---** | **---** | **---** | **---** | **---** | **K.LSSPAVITDK.V** 4584 |
|  | 5219 | 583.65 | 1747.93 | 1748.03 | -0.10 | 0 | 27 | 0.15 | 1 | --- | --- | --- | --- | --- | --- | K.EAQLPVIENK.V 5211 5212 5217 5218 5220 |

  


---

|  |  |
| --- | --- |
| **52.** | P01842    **Mass:** 14105    **Score:** 34     **Queries matched:** 3   **emPAI:** 0.28 |
|  | Ig lambda chain C regions OS=Homo sapiens GN=IGLC1 PE=1 SV=1 |

|  |  |  |  |  |  |
| --- | --- | --- | --- | --- | --- |
|  | **Quantitation:** | **Ratio** | **Weighted** | **N** | **SD(geo)** |
|  |  | Patient1-Art/Control | --- | 0 | --- |
|  |  | Patient1-Porta/Control | --- | 0 | --- |
|  |  | Patient1-Hepa/Control | --- | 0 | --- |
|  |  | Patient3-Art/Control | --- | 0 | --- |
|  |  | Patient3-Porta/Control | --- | 0 | --- |
|  |  | Patient3-Hepa/Control | --- | 0 | --- |

|  |  |  |  |  |  |  |  |  |  |  |  |  |  |  |  |  |
| --- | --- | --- | --- | --- | --- | --- | --- | --- | --- | --- | --- | --- | --- | --- | --- | --- |
|  | **Query** | **Observed** | **Mr(expt)** | **Mr(calc)** | **Delta** | **Miss** | **Score** | **Expect** | **Rank** | **Patient1-Art/Control** | **Patient1-Porta/Control** | **Patient1-Hepa/Control** | **Patient3-Art/Control** | **Patient3-Porta/Control** | **Patient3-Hepa/Control** | **Peptide** |
|  | 9075 | **784.72** | **2351.14** | **2351.26** | **-0.12** | **0** | **1** | **35** | **1** | **---** | **---** | **---** | **---** | **---** | **---** | **K.YAASSYLSLTPEQWK.S** |
|  | 10580 | **865.48** | **2593.42** | **2593.42** | **0.00** | **0** | **26** | **0.16** | **1** | **---** | **---** | **---** | **---** | **---** | **---** | **K.AAPSVTLFPPSSEELQANK.A** 10579 |

  


---

|  |  |
| --- | --- |
| **53.** | P02452    **Mass:** 157298   **Score:** 34     **Queries matched:** 13   **emPAI:** 0.02 |
|  | Collagen alpha-1(I) chain OS=Homo sapiens GN=COL1A1 PE=1 SV=4 |

|  |  |  |  |  |  |
| --- | --- | --- | --- | --- | --- |
|  | **Quantitation:** | **Ratio** | **Weighted** | **N** | **SD(geo)** |
|  |  | Patient1-Art/Control | --- | 1 | --- |
|  |  | Patient1-Porta/Control | --- | 1 | --- |
|  |  | Patient1-Hepa/Control | --- | 1 | --- |
|  |  | Patient3-Art/Control | --- | 1 | --- |
|  |  | Patient3-Porta/Control | --- | 1 | --- |
|  |  | Patient3-Hepa/Control | --- | 1 | --- |

|  |  |  |  |  |  |  |  |  |  |  |  |  |  |  |  |  |
| --- | --- | --- | --- | --- | --- | --- | --- | --- | --- | --- | --- | --- | --- | --- | --- | --- |
|  | **Query** | **Observed** | **Mr(expt)** | **Mr(calc)** | **Delta** | **Miss** | **Score** | **Expect** | **Rank** | **Patient1-Art/Control** | **Patient1-Porta/Control** | **Patient1-Hepa/Control** | **Patient3-Art/Control** | **Patient3-Porta/Control** | **Patient3-Hepa/Control** | **Peptide** |
|  | 395 | **445.70** | **889.38** | **889.49** | **-0.12** | **0** | **7** | **5.9** | **1** | **---** | **---** | **---** | **---** | **---** | **---** | **K.GPAGER.G** 396 |
|  | 576 | **469.24** | **936.46** | **936.49** | **-0.03** | **0** | **2** | **18** | **1** | **---** | **---** | **---** | **---** | **---** | **---** | **R.AEGNSR.F** |
|  | 1925 | **576.79** | **1151.56** | **1151.68** | **-0.11** | **0** | **27** | **0.2** | **1** | **---** | **---** | **---** | **---** | **---** | **---** | **R.GDAGPK.G** 1924 1927 |
|  | 3327 | **688.32** | **1374.62** | **1374.81** | **-0.19** | **0** | **20** | **0.44** | **1** | **---** | **---** | **---** | **---** | **---** | **---** | **R.GSPGPAGPK.G** |
|  | 3809 | **730.35** | **1458.68** | **1458.83** | **-0.15** | **0** | **34** | **0.019** | **1** | **0.563** | **0.896** | **1.042** | **5.537** | **5.153** | **4.458** | **R.GFSGLDGAK.G** 3811 3815 3816 3818 3821 |

  


---

|  |  |
| --- | --- |
| **54.** | Q86XS8    **Mass:** 53970    **Score:** 32     **Queries matched:** 13   **emPAI:** 0.07 |
|  | Goliath homolog OS=Homo sapiens GN=RNF130 PE=1 SV=1 |

|  |  |  |  |  |  |
| --- | --- | --- | --- | --- | --- |
|  | **Quantitation:** | **Ratio** | **Weighted** | **N** | **SD(geo)** |
|  |  | Patient1-Art/Control | --- | 2 | --- |
|  |  | Patient1-Porta/Control | --- | 2 | --- |
|  |  | Patient1-Hepa/Control | --- | 2 | --- |
|  |  | Patient3-Art/Control | --- | 2 | --- |
|  |  | Patient3-Porta/Control | --- | 2 | --- |
|  |  | Patient3-Hepa/Control | --- | 2 | --- |

|  |  |  |  |  |  |  |  |  |  |  |  |  |  |  |  |  |
| --- | --- | --- | --- | --- | --- | --- | --- | --- | --- | --- | --- | --- | --- | --- | --- | --- |
|  | **Query** | **Observed** | **Mr(expt)** | **Mr(calc)** | **Delta** | **Miss** | **Score** | **Expect** | **Rank** | **Patient1-Art/Control** | **Patient1-Porta/Control** | **Patient1-Hepa/Control** | **Patient3-Art/Control** | **Patient3-Porta/Control** | **Patient3-Hepa/Control** | **Peptide** |
|  | 948 | 495.68 | 989.34 | 989.44 | -0.10 | 0 | 26 | 0.012 | 1 | 1.364 | 0.734 | 1.337 | 0.805 | 1.098 | 0.972 | -.MSCAGR.A 945 946 947 949 950 951 952 953 954 955 958 |
|  | 11246 | **915.11** | **2742.30** | **2742.38** | **-0.08** | **0** | **1** | **29** | **1** | **---** | **---** | **---** | **---** | **---** | **---** | **R.ADNASQEYYTALINVTVQEPGR.G** |

  


---

|  |  |
| --- | --- |
| **55.** | P13671    **Mass:** 128043   **Score:** 31     **Queries matched:** 7   **emPAI:** 0.03 |
|  | Complement component C6 OS=Homo sapiens GN=C6 PE=1 SV=3 |

|  |  |  |  |  |  |
| --- | --- | --- | --- | --- | --- |
|  | **Quantitation:** | **Ratio** | **Weighted** | **N** | **SD(geo)** |
|  |  | Patient1-Art/Control | --- | 0 | --- |
|  |  | Patient1-Porta/Control | --- | 0 | --- |
|  |  | Patient1-Hepa/Control | --- | 0 | --- |
|  |  | Patient3-Art/Control | --- | 0 | --- |
|  |  | Patient3-Porta/Control | --- | 0 | --- |
|  |  | Patient3-Hepa/Control | --- | 0 | --- |

|  |  |  |  |  |  |  |  |  |  |  |  |  |  |  |  |  |
| --- | --- | --- | --- | --- | --- | --- | --- | --- | --- | --- | --- | --- | --- | --- | --- | --- |
|  | **Query** | **Observed** | **Mr(expt)** | **Mr(calc)** | **Delta** | **Miss** | **Score** | **Expect** | **Rank** | **Patient1-Art/Control** | **Patient1-Porta/Control** | **Patient1-Hepa/Control** | **Patient3-Art/Control** | **Patient3-Porta/Control** | **Patient3-Hepa/Control** | **Peptide** |
|  | 2861 | 642.81 | 1283.60 | 1283.59 | 0.01 | 0 | 3 | 26 | 6 | --- | --- | --- | --- | --- | --- | R.QGDVECQR.T |
|  | 5810 | 615.36 | 1843.05 | 1843.00 | 0.04 | 0 | 3 | 36 | 2 | --- | --- | --- | --- | --- | --- | R.IGESIELTCPK.G 5763 5764 5772 5773 |
|  | 7176 | **698.70** | **2093.08** | **2093.07** | **0.01** | **0** | **31** | **0.052** | **1** | **---** | **---** | **---** | **---** | **---** | **---** | **R.GEVLDNSFTGGICK.T** |

  


---

|  |
| --- |
| **Mascot:**  http://www.matrixscience.com/ |

|  |  |
| --- | --- |
| |  | | --- | | Top scoring peptide matches to query 256 32: Sum of 2 scans in range 195 (rt=13.9299, f=3, i=12) to 201 (rt=14.2286, f=3, i=13) [\\172.16.3.18\masslynx\2009.PRO\Data\20090825\_26\_qdda.raw] Score greater than 23 indicates homology Score greater than 29 indicates identity  ``` Score    Expect   Delta  Hit  Protein Peptide  17.1      0.92   -0.08   19   P00751 R.GLTLR.G   9.2       5.7   -0.08               R.GTILR.C   9.2       5.7   -0.08               GTLIR   9.2       5.7   -0.08               GTLLR   8.8       6.3   -0.08               K.IGTLR.S   8.8       6.3   -0.08               LGTIR   8.8       6.3   -0.08               LGTLR   7.2       9.1   -0.08               AVTLR   6.0        12   -0.08               GLLTR   5.6        13   -0.04               GIDVR ``` | |

|  |  |
| --- | --- |
| |  | | --- | | Top scoring peptide matches to query 257 69: Sum of 3 scans in range 297 (rt=18.7825, f=3, i=23) to 303 (rt=19.0812, f=3, i=24) [\\172.16.3.18\masslynx\2009.PRO\Data\20090825\_18\_qdda.raw] Score greater than 17 indicates homology Score greater than 29 indicates identity  ``` Score    Expect   Delta  Hit  Protein Peptide   5.4        14   -0.05               K.IGTLR.S   5.4        14   -0.05               LGTIR   5.4        14   -0.05               LGTLR   4.6        17   -0.04               R.LLNVT.-   4.3        18   -0.05   19   P00751 R.GLTLR.G   3.0        24   -0.01               AAEIR   3.0        24   -0.01               AAELR   2.9        25   -0.05               AVTLR ``` | |

|  |  |
| --- | --- |
| |  | | --- | | Top scoring peptide matches to query 258 56: Sum of 3 scans in range 328 (rt=20.1112, f=4, i=22) to 339 (rt=20.6455, f=5, i=20) [\\172.16.3.18\masslynx\2009.PRO\Data\20090825\_14\_qdda.raw] Score greater than 17 indicates homology Score greater than 29 indicates identity  ``` Score    Expect   Delta  Hit  Protein Peptide   5.1        15   -0.03   19   P00751 R.GLTLR.G   3.9        19   -0.03               AVTLR   2.5        27   -0.03               GLLTR   2.2        28   -0.03               K.IGTLR.S   2.2        28   -0.03               LGTIR   2.2        28   -0.03               LGTLR   1.1        37   -0.03               K.AVITR.R   1.1        37   -0.03               R.AVLTR.Q ``` | |

|  |  |
| --- | --- |
| |  | | --- | | Top scoring peptide matches to query 261 36: Sum of 4 scans in range 213 (rt=14.8037, f=7, i=8) to 230 (rt=15.6236, f=5, i=14) [\\172.16.3.18\masslynx\2009.PRO\Data\20090828\_08\_qdda.raw] Score greater than 17 indicates homology Score greater than 29 indicates identity  ``` Score    Expect   Delta  Hit  Protein Peptide   6.8        10    0.04               GLVDR   4.1        19    0.04               GIDVR   4.1        19    0.01               GLLTR   4.1        19    0.01   19   P00751 R.GLTLR.G ``` | |

|  |  |
| --- | --- |
| |  | | --- | | Top scoring peptide matches to query 340 38: Scan 206 (rt=14.5076, f=5, i=16) [\\172.16.3.18\masslynx\2009.PRO\Data\20090824\_33\_qdda.raw] Score greater than 21 indicates homology Score greater than 30 indicates identity  ``` Score    Expect   Delta  Hit  Protein Peptide  13.3       2.7   -0.06   13   P04217 DAVLR   7.7       9.7   -0.06               DLGLR   7.7       9.7   -0.06               R.DVALR.C   7.4        10   -0.06               GEVIR   7.4        10   -0.06               GEVLR   6.4        13   -0.06               K.DAIVR.A   6.4        13   -0.06               DALVR   5.2        17    0.01               DADPR   4.6        20   -0.06               R.GDIIR.V   4.6        20   -0.06               GDILR ``` | |

|  |  |
| --- | --- |
| |  | | --- | | Top scoring peptide matches to query 342 29: Sum of 2 scans in range 175 (rt=13.0885, f=6, i=11) to 181 (rt=13.3872, f=6, i=12) [\\172.16.3.18\masslynx\2009.PRO\Data\20090821\_17\_qdda.raw] Score greater than 28 indicates homology Score greater than 30 indicates identity  ``` Score    Expect   Delta  Hit  Protein Peptide  20.3      0.53   -0.05   13   P04217 DAVLR  14.3       2.1   -0.05               DLGLR  14.3       2.1   -0.05               R.DVALR.C   7.9       9.2    0.02               DADPR   7.9       9.2   -0.05               K.DAIVR.A   7.9       9.2   -0.05               DALVR   7.7       9.5   -0.05               GEVIR   7.7       9.5   -0.05               GEVLR   7.0        11   -0.05               R.EGVIR.Y   7.0        11   -0.05               R.EGVLR.T ``` | |

|  |  |
| --- | --- |
| |  | | --- | | Top scoring peptide matches to query 343 26: Sum of 2 scans in range 193 (rt=13.8627, f=4, i=9) to 199 (rt=14.1614, f=4, i=10) [\\172.16.3.18\masslynx\2009.PRO\Data\20090821\_13\_qdda.raw] Score greater than 21 indicates homology Score greater than 30 indicates identity  ``` Score    Expect   Delta  Hit  Protein Peptide  14.8       1.9   -0.05   13   P04217 DAVLR   7.8       9.4   -0.05               DLGLR   7.8       9.4   -0.05               R.DVALR.C   5.3        17    0.03               DGPER   4.8        19   -0.08               K.ATIIR.V   4.8        19   -0.08               R.ATLIR.G   4.8        19   -0.08               ATLLR   4.8        19   -0.05               R.GDIIR.V   4.8        19   -0.05               GDILR   4.8        19   -0.05               R.GDLIR.I ``` | |

|  |  |
| --- | --- |
| |  | | --- | | Top scoring peptide matches to query 344 29: Sum of 3 scans in range 164 (rt=12.3638, f=6, i=6) to 179 (rt=13.0975, f=7, i=12) [\\172.16.3.18\masslynx\2009.PRO\Data\20090825\_22\_qdda.raw] Score greater than 27 indicates homology Score greater than 30 indicates identity  ``` Score    Expect   Delta  Hit  Protein Peptide  19.3      0.67   -0.05   13   P04217 DAVLR  12.9       2.9   -0.05               DLGLR  12.9       2.9   -0.05               R.DVALR.C   8.4       8.2   -0.05               R.EGVIR.Y   8.4       8.2   -0.05               R.EGVLR.T   8.4       8.2   -0.05               GEVIR   8.4       8.2   -0.05               GEVLR   8.4       8.2   -0.08               R.SVVIR.T   8.4       8.2   -0.08               SVVLR   7.0        11    0.03               DADPR ``` | |

|  |  |
| --- | --- |
| |  | | --- | | Top scoring peptide matches to query 347 24: Sum of 2 scans in range 193 (rt=13.8258, f=3, i=12) to 199 (rt=14.1245, f=3, i=13) [\\172.16.3.18\masslynx\2009.PRO\Data\20090821\_09\_qdda.raw] Score greater than 18 indicates homology Score greater than 30 indicates identity  ``` Score    Expect   Delta  Hit  Protein Peptide   5.5        16   -0.03   13   P04217 DAVLR ``` | |

|  |  |
| --- | --- |
| |  | | --- | | Top scoring peptide matches to query 395 3: Scan 102 (rt=9.3866, f=4, i=1) [\\172.16.3.18\masslynx\2009.PRO\Data\20090825\_26\_qdda.raw] Score greater than 19 indicates homology Score greater than 27 indicates identity  ``` Score    Expect   Delta  Hit  Protein Peptide   6.5       5.9   -0.12   53   P02452 K.GPAGER.G   6.5       5.9   -0.12               R.GPGEAR.G   6.5       5.9   -0.12               GPQER   6.5       5.9   -0.13               R.GPWAR.G ``` | |

|  |  |
| --- | --- |
| |  | | --- | | Top scoring peptide matches to query 396 3: Sum of 2 scans in range 108 (rt=9.72223, f=2, i=15) to 114 (rt=10.0209, f=2, i=16) [\\172.16.3.18\masslynx\2009.PRO\Data\20090824\_33\_qdda.raw] Score greater than 18 indicates homology Score greater than 27 indicates identity  ``` Score    Expect   Delta  Hit  Protein Peptide   5.0       9.5   -0.09   53   P02452 K.GPAGER.G ``` | |

|  |  |
| --- | --- |
| |  | | --- | | Top scoring peptide matches to query 461 72: Sum of 2 scans in range 342 (rt=21.23, f=4, i=33) to 348 (rt=21.5287, f=4, i=34) [\\172.16.3.18\masslynx\2009.PRO\Data\20090825\_38\_qdda.raw] Score greater than 22 indicates homology Score greater than 29 indicates identity  ``` Score    Expect   Delta  Hit  Protein Peptide  15.1       1.5   -0.12   13   P04217 R.FALVR.E  15.1       1.5   -0.08               MALVR   8.3       7.3   -0.12               K.FAVIR.H   8.3       7.3   -0.01               MADPR   8.3       7.3   -0.08               MAVLR   6.2        12   -0.12               R.AFIVR.S   6.2        12   -0.12               R.AFLVR.S   6.2        12   -0.08               K.AMIVR.N   5.3        14   -0.12               FLAVR   5.3        14   -0.08               FSPVR ``` | |

|  |  |
| --- | --- |
| |  | | --- | | Top scoring peptide matches to query 462 82: Sum of 2 scans in range 379 (rt=23.1034, f=7, i=43) to 385 (rt=23.4021, f=7, i=44) [\\172.16.3.18\masslynx\2009.PRO\Data\20090824\_17\_qdda.raw] Score greater than 24 indicates homology Score greater than 29 indicates identity  ``` Score    Expect   Delta  Hit  Protein Peptide  15.8       1.3   -0.10   13   P04217 R.FALVR.E  15.8       1.3   -0.07               MALVR  10.6       4.3   -0.10               K.FAVIR.H  10.6       4.3   -0.07               MAVLR   8.4       7.1    0.00               MADPR   5.1        15   -0.10               R.AFIVR.S   5.1        15   -0.10               R.AFLVR.S   5.1        15   -0.07               K.AMIVR.N   4.5        17   -0.10               FLAVR   4.5        17   -0.07               FSPVR ``` | |

|  |  |
| --- | --- |
| |  | | --- | | Top scoring peptide matches to query 463 62: Sum of 4 scans in range 350 (rt=21.6028, f=4, i=32) to 366 (rt=22.3993, f=4, i=35) [\\172.16.3.18\masslynx\2009.PRO\Data\20090825\_34\_qdda.raw] Score greater than 25 indicates homology Score greater than 29 indicates identity  ``` Score    Expect   Delta  Hit  Protein Peptide  18.8      0.64   -0.10   13   P04217 R.FALVR.E  18.8      0.64   -0.07               MALVR  11.8       3.3   -0.10               K.FAVIR.H  11.8       3.3    0.00               MADPR  11.8       3.3   -0.07               MAVLR   7.0       9.9   -0.10               R.AFIVR.S   7.0       9.9   -0.10               R.AFLVR.S   7.0       9.9   -0.07               K.AMIVR.N   6.9        10   -0.10               FLAVR   6.9        10   -0.06               FSPVR ``` | |

|  |  |
| --- | --- |
| |  | | --- | | Top scoring peptide matches to query 464 92: Sum of 2 scans in range 441 (rt=25.9482, f=2, i=59) to 447 (rt=26.2469, f=2, i=60) [\\172.16.3.18\masslynx\2009.PRO\Data\20090825\_26\_qdda.raw] Score greater than 16 indicates homology Score greater than 29 indicates identity  ``` Score    Expect   Delta  Hit  Protein Peptide  10.2       4.7   -0.08   13   P04217 R.FALVR.E  10.2       4.7   -0.05               MALVR   2.8        26    0.02               MADPR   2.7        26   -0.01               K.SPMVR.K   2.1        30   -0.08               K.FAVIR.H   2.1        30   -0.05               MAVLR   1.7        33   -0.08               FLAVR   1.7        33   -0.05               FSPVR   1.7        33   -0.05               MLAVR   1.7        33   -0.01               -.MPSVR.S ``` | |

|  |  |
| --- | --- |
| |  | | --- | | Top scoring peptide matches to query 468 146: Sum of 2 scans in range 511 (rt=29.218, f=2, i=80) to 517 (rt=29.5166, f=2, i=81) [\\172.16.3.18\masslynx\2009.PRO\Data\20090825\_18\_qdda.raw] Score greater than 17 indicates homology Score greater than 29 indicates identity  ``` Score    Expect   Delta  Hit  Protein Peptide   7.2       9.4   -0.07   13   P04217 R.FALVR.E   7.2       9.4   -0.03               MALVR   4.4        18    0.00               K.SPMVR.K ``` | |

|  |  |
| --- | --- |
| |  | | --- | | Top scoring peptide matches to query 469 121: Sum of 2 scans in range 484 (rt=27.9397, f=3, i=58) to 490 (rt=28.2384, f=3, i=59) [\\172.16.3.18\masslynx\2009.PRO\Data\20090825\_22\_qdda.raw] Score greater than 20 indicates homology Score greater than 29 indicates identity  ``` Score    Expect   Delta  Hit  Protein Peptide  13.2       2.3   -0.06   13   P04217 R.FALVR.E  13.2       2.3   -0.03               MALVR   7.0       9.9    0.04               MADPR   5.8        13   -0.06               K.FAVIR.H   5.8        13   -0.03               MAVLR   4.5        17   -0.06               R.AFIVR.S   4.5        17   -0.06               R.AFLVR.S   4.5        17   -0.03               K.AMIVR.N   3.6        21   -0.06               FLAVR   3.6        21   -0.03               FSPVR ``` | |

|  |  |
| --- | --- |
| |  | | --- | | Top scoring peptide matches to query 471 123: Sum of 2 scans in range 524 (rt=29.6408, f=2, i=91) to 530 (rt=29.9395, f=2, i=92) [\\172.16.3.18\masslynx\2009.PRO\Data\20090825\_14\_qdda.raw] Score greater than 16 indicates homology Score greater than 29 indicates identity  ``` Score    Expect   Delta  Hit  Protein Peptide  10.2       4.7   -0.06   13   P04217 R.FALVR.E  10.2       4.7   -0.02               MALVR   2.5        27   -0.06               FLAVR   2.5        27   -0.02               MLAVR   2.1        30    0.05               MADPR   1.6        34   -0.06               R.AFIVR.S   1.6        34   -0.06               R.AFLVR.S   1.6        34   -0.02               K.AMIVR.N   1.0        39   -0.06               K.FAVIR.H   1.0        39   -0.02               MAVLR ``` | |

|  |  |
| --- | --- |
| |  | | --- | | Top scoring peptide matches to query 472 107: Sum of 2 scans in range 509 (rt=29.2868, f=4, i=60) to 515 (rt=29.5855, f=4, i=61) [\\172.16.3.18\masslynx\2009.PRO\Data\20090821\_13\_qdda.raw] Score greater than 13 indicates homology Score greater than 29 indicates identity  ``` Score    Expect   Delta  Hit  Protein Peptide   0.7        42   -0.04   13   P04217 R.FALVR.E   0.7        42   -0.01               MALVR ``` | |

|  |  |
| --- | --- |
| |  | | --- | | Top scoring peptide matches to query 474 103: Sum of 5 scans in range 396 (rt=23.9406, f=7, i=48) to 414 (rt=24.8234, f=4, i=50) [\\172.16.3.18\masslynx\2009.PRO\Data\20090828\_24\_qdda.raw] Score greater than 17 indicates homology Score greater than 29 indicates identity  ``` Score    Expect   Delta  Hit  Protein Peptide   5.7        13    0.05               K.FGPER.M   5.7        13    0.09               MGPER   4.5        17   -0.02   13   P04217 R.FALVR.E   4.5        17    0.01               MALVR   2.5        28    0.05               K.FPGER.W   1.4        36    0.03               K.SLTER.A   0.5        44    0.07               K.SVDER.R ``` | |

|  |  |
| --- | --- |
| |  | | --- | | Top scoring peptide matches to query 477 191: Sum of 45 scans in range 1281 (rt=67.4709, f=3, i=164) to 1419 (rt=74.3036, f=6, i=163) [\\172.16.3.18\masslynx\2009.PRO\Data\20090908\_09\_qdda.raw] Score greater than 23 indicates homology Score greater than 29 indicates identity  ``` Score    Expect   Delta  Hit  Protein Peptide  16.1       1.1    0.10   13   P04217 R.FALVR.E   9.3       5.1    0.10               K.FAVIR.H   9.2       5.3    0.13               MALVR   6.5       9.7    0.10               R.AFIVR.S   6.5       9.7    0.10               R.AFLVR.S   5.5        12    0.10               FLAVR   3.2        21    0.13               MAVLR ``` | |

|  |  |
| --- | --- |
| |  | | --- | | Top scoring peptide matches to query 480 46: Sum of 2 scans in range 257 (rt=16.9272, f=3, i=20) to 263 (rt=17.2259, f=3, i=21) [\\172.16.3.18\masslynx\2009.PRO\Data\20090825\_26\_qdda.raw] Score greater than 32 indicates identity  ``` Score    Expect   Delta  Hit  Protein Peptide  21.3      0.59   -0.10               -.MSLSR.S  20.0       0.8   -0.13    7   P01011 FSISR  20.0       0.8   -0.13               FSLSR  15.1       2.5   -0.06               -.MSEAR.R  13.7       3.4   -0.10               R.FSEAR.I  13.7       3.4   -0.13               FSSLR  10.5       7.2   -0.10               K.SMISR.K   9.6       8.8   -0.13               K.AYISR.S   9.6       8.8   -0.13               SFISR   9.6       8.8   -0.13               SFLSR ``` | |

|  |  |
| --- | --- |
| |  | | --- | | Top scoring peptide matches to query 482 37: Sum of 2 scans in range 218 (rt=15.2005, f=6, i=19) to 224 (rt=15.4992, f=6, i=20) [\\172.16.3.18\masslynx\2009.PRO\Data\20090824\_17\_qdda.raw] Score greater than 17 indicates homology Score greater than 32 indicates identity  ``` Score    Expect   Delta  Hit  Protein Peptide   6.7        17   -0.11    7   P01011 FSISR   6.7        17   -0.11               FSLSR   6.7        17   -0.08               -.MSLSR.S   4.6        28   -0.11               K.AYISR.S   4.6        28   -0.11               SFISR   4.6        28   -0.11               SFLSR   4.6        28   -0.08               K.SMISR.K   3.0        40   -0.12               K.HPISR.W ``` | |

|  |  |
| --- | --- |
| |  | | --- | | Top scoring peptide matches to query 487 60: Sum of 2 scans in range 303 (rt=19.1383, f=2, i=32) to 309 (rt=19.437, f=2, i=33) [\\172.16.3.18\masslynx\2009.PRO\Data\20090825\_22\_qdda.raw] Score greater than 32 indicates identity  ``` Score    Expect   Delta  Hit  Protein Peptide  19.9      0.82   -0.06               -.MSLSR.S  18.6       1.1   -0.10    7   P01011 FSISR  18.6       1.1   -0.10               FSLSR  14.9       2.6   -0.03               -.MSEAR.R  13.5       3.6   -0.06               R.FSEAR.I  13.5       3.6   -0.10               FSSLR  13.1       3.9   -0.06               K.SMISR.K  12.3       4.7   -0.10               SFISR  12.3       4.7   -0.10               SFLSR  10.2       7.7   -0.03               R.SEMSR.T ``` | |

|  |  |
| --- | --- |
| |  | | --- | | Top scoring peptide matches to query 490 70: Sum of 2 scans in range 365 (rt=21.9065, f=4, i=25) to 371 (rt=22.2052, f=4, i=26) [\\172.16.3.18\masslynx\2009.PRO\Data\20090825\_14\_qdda.raw] Score greater than 22 indicates homology Score greater than 32 indicates identity  ``` Score    Expect   Delta  Hit  Protein Peptide  19.6      0.88   -0.08    7   P01011 FSISR  19.6      0.88   -0.08               FSLSR  19.6      0.88   -0.04               -.MSLSR.S   8.5        11   -0.04               K.SMISR.K   8.3        12   -0.08               K.AYISR.S   8.2        12   -0.04               K.FEASR.G   8.2        12   -0.08               R.FISSR.Q   8.2        12   -0.08               FLSSR   8.2        12   -0.08               R.FTVSR.D   8.2        12   -0.01               -.MAESR.G ``` | |

|  |  |
| --- | --- |
| |  | | --- | | Top scoring peptide matches to query 492 41: Sum of 5 scans in range 246 (rt=16.4658, f=7, i=24) to 263 (rt=17.299, f=4, i=21) [\\172.16.3.18\masslynx\2009.PRO\Data\20090824\_29\_qdda.raw] Score greater than 29 indicates homology Score greater than 32 indicates identity  ``` Score    Expect   Delta  Hit  Protein Peptide  21.0      0.64   -0.03               -.MSLSR.S  19.7      0.86   -0.06    7   P01011 FSISR  19.7      0.86   -0.06               FSLSR  14.8       2.7    0.00               -.MSEAR.R  13.4       3.7   -0.03               R.FSEAR.I  13.4       3.7   -0.06               FSSLR  10.2       7.7   -0.03               K.SMISR.K   9.3       9.4   -0.06               K.AYISR.S   9.3       9.4   -0.06               SFISR   9.3       9.4   -0.06               SFLSR ``` | |

|  |  |
| --- | --- |
| |  | | --- | | Top scoring peptide matches to query 494 81: Scan 380 (rt=22.5182, f=4, i=25) [\\172.16.3.18\masslynx\2009.PRO\Data\20090824\_41\_qdda.raw] Score greater than 16 indicates homology Score greater than 32 indicates identity  ``` Score    Expect   Delta  Hit  Protein Peptide   4.7        27   -0.05    7   P01011 FSISR   4.7        27   -0.05               FSLSR   4.7        27   -0.02               -.MSLSR.S   3.9        33   -0.02               R.FSEAR.I   3.9        33   -0.05               FSSLR   3.9        33    0.02               -.MSEAR.R ``` | |

|  |  |
| --- | --- |
| |  | | --- | | Top scoring peptide matches to query 500 45: Sum of 2 scans in range 225 (rt=15.5057, f=3, i=19) to 234 (rt=15.9405, f=3, i=20) [\\172.16.3.18\masslynx\2009.PRO\Data\20090828\_20\_qdda.raw] Score greater than 16 indicates homology Score greater than 32 indicates identity  ``` Score    Expect   Delta  Hit  Protein Peptide   3.7        34   -0.00    7   P01011 FSISR   3.7        34   -0.00               FSLSR   3.7        34    0.03               -.MSLSR.S ``` | |

|  |  |
| --- | --- |
| |  | | --- | | Top scoring peptide matches to query 510 20: Sum of 2 scans in range 149 (rt=11.6868, f=4, i=6) to 155 (rt=11.9855, f=4, i=7) [\\172.16.3.18\masslynx\2009.PRO\Data\20090825\_26\_qdda.raw] Score greater than 14 indicates homology Score greater than 25 indicates identity  ``` Score    Expect   Delta  Hit  Protein Peptide  11.8       1.3   -0.13    5   P02647 VEPLR   0.8        16   -0.11               R.VTHTR.R   0.8        16   -0.11               R.VTTHR.R   0.0        19   -0.13               VIEPR   0.0        19   -0.13               R.VLPER.I ``` | |

|  |  |
| --- | --- |
| |  | | --- | | Top scoring peptide matches to query 511 33: Sum of 2 scans in range 188 (rt=13.7227, f=4, i=11) to 194 (rt=14.0213, f=4, i=12) [\\172.16.3.18\masslynx\2009.PRO\Data\20090821\_17\_qdda.raw] Score greater than 21 indicates homology Score greater than 26 indicates identity  ``` Score    Expect   Delta  Hit  Protein Peptide  13.2         1   -0.10    5   P02647 VEPLR   7.5       3.8   -0.10               K.DILPR.H   7.5       3.8   -0.10               DLLPR   7.5       3.8   -0.10               K.DLPIR.K   7.5       3.8   -0.10               DLPLR   7.5       3.8   -0.10               R.EVIPR.S   7.5       3.8   -0.10               R.EVLPR.S   7.5       3.8   -0.10               R.EVPLR.C   7.5       3.8   -0.10               R.IDLPR.K   7.5       3.8   -0.10               R.IDPIR.S ``` | |

|  |  |
| --- | --- |
| |  | | --- | | Top scoring peptide matches to query 512 42: Sum of 2 scans in range 217 (rt=15.0419, f=3, i=18) to 223 (rt=15.3406, f=3, i=19) [\\172.16.3.18\masslynx\2009.PRO\Data\20090824\_33\_qdda.raw] Score greater than 13 indicates homology Score greater than 26 indicates identity  ``` Score    Expect   Delta  Hit  Protein Peptide  10.4       1.9   -0.07    5   P02647 VEPLR   0.4        20   -0.04               R.VTHTR.R   0.4        20   -0.04               R.VTTHR.R ``` | |

|  |  |
| --- | --- |
| |  | | --- | | Top scoring peptide matches to query 514 31: Sum of 5 scans in range 175 (rt=12.8983, f=3, i=9) to 192 (rt=13.7315, f=3, i=13) [\\172.16.3.18\masslynx\2009.PRO\Data\20090825\_22\_qdda.raw] Score greater than 20 indicates homology Score greater than 26 indicates identity  ``` Score    Expect   Delta  Hit  Protein Peptide  13.1       1.1   -0.07    5   P02647 VEPLR   6.4       4.9   -0.07               K.DILPR.H   6.4       4.9   -0.07               DLLPR   6.4       4.9   -0.07               K.DLPIR.K   6.4       4.9   -0.07               DLPLR   6.4       4.9   -0.07               R.EVIPR.S   6.4       4.9   -0.07               R.EVLPR.S   6.4       4.9   -0.07               R.EVPLR.C   6.4       4.9   -0.07               R.IDLPR.K   6.4       4.9   -0.07               R.IDPIR.S ``` | |

|  |  |
| --- | --- |
| |  | | --- | | Top scoring peptide matches to query 515 15: Scan 166 (rt=12.3911, f=6, i=5) [\\172.16.3.18\masslynx\2009.PRO\Data\20090825\_14\_qdda.raw] Score greater than 20 indicates homology Score greater than 26 indicates identity  ``` Score    Expect   Delta  Hit  Protein Peptide   7.8       3.5   -0.04    5   P02647 VEPLR   6.6       4.7   -0.04               K.DLPIR.K   6.6       4.7   -0.04               DLPLR   5.5       6.1   -0.04               R.EVPLR.C   5.5       6.1   -0.04               R.IDPIR.S   5.5       6.1   -0.04               LDPLR   5.5       6.1   -0.02               K.MPPLR.K   0.3        20   -0.04               K.DILPR.H   0.3        20   -0.04               DLLPR ``` | |

|  |  |
| --- | --- |
| |  | | --- | | Top scoring peptide matches to query 517 26: Sum of 6 scans in range 172 (rt=12.7514, f=2, i=21) to 200 (rt=14.0928, f=3, i=12) [\\172.16.3.18\masslynx\2009.PRO\Data\20090825\_18\_qdda.raw] Score greater than 20 indicates homology Score greater than 26 indicates identity  ``` Score    Expect   Delta  Hit  Protein Peptide  14.2      0.81   -0.03    5   P02647 VEPLR   6.9       4.4   -0.03               K.DLPIR.K   6.9       4.4   -0.03               DLPLR   6.9       4.4   -0.03               R.EVPLR.C   6.9       4.4   -0.03               R.IDPIR.S   6.9       4.4   -0.03               LDPLR   6.9       4.4   -0.01               K.MPPLR.K   1.9        14   -0.03               VPEIR   0.8        18   -0.01               R.VTHTR.R   0.8        18   -0.01               R.VTTHR.R ``` | |

|  |  |
| --- | --- |
| |  | | --- | | Top scoring peptide matches to query 518 42: Scan 217 (rt=14.9057, f=3, i=14) [\\172.16.3.18\masslynx\2009.PRO\Data\20090825\_18\_qdda.raw] Score greater than 15 indicates homology Score greater than 26 indicates identity  ``` Score    Expect   Delta  Hit  Protein Peptide   5.5         6   -0.03    5   P02647 VEPLR   2.1        13   -0.00               R.VTHTR.R   0.8        18   -0.00               R.VTTHR.R ``` | |

|  |  |
| --- | --- |
| |  | | --- | | Top scoring peptide matches to query 520 30: Scan 239 (rt=16.0358, f=3, i=28) [\\172.16.3.18\masslynx\2009.PRO\Data\20090821\_05\_qdda.raw] Score greater than 18 indicates homology Score greater than 26 indicates identity  ``` Score    Expect   Delta  Hit  Protein Peptide  10.9       1.8   -0.01    5   P02647 VEPLR   5.2       6.5   -0.01               K.DILPR.H   5.2       6.5   -0.01               DLLPR   5.2       6.5   -0.01               K.DLPIR.K   5.2       6.5   -0.01               DLPLR   5.2       6.5   -0.01               R.EVIPR.S   5.2       6.5   -0.01               R.EVLPR.S   5.2       6.5   -0.01               R.EVPLR.C   5.2       6.5   -0.01               R.IDLPR.K   5.2       6.5   -0.01               R.IDPIR.S ``` | |

|  |  |
| --- | --- |
| |  | | --- | | Top scoring peptide matches to query 521 29: Scan 225 (rt=15.1517, f=6, i=6) [\\172.16.3.18\masslynx\2009.PRO\Data\20090825\_14\_qdda.raw] Score greater than 14 indicates homology Score greater than 26 indicates identity  ``` Score    Expect   Delta  Hit  Protein Peptide   5.8       5.6   -0.01    5   P02647 VEPLR   0.8        18   -0.01               K.DILPR.H   0.8        18   -0.01               DLLPR   0.8        18   -0.01               K.DLPIR.K   0.8        18   -0.01               DLPLR   0.8        18   -0.01               R.EVIPR.S   0.8        18   -0.01               R.EVLPR.S   0.8        18   -0.01               R.EVPLR.C   0.8        18   -0.01               R.IDLPR.K   0.8        18   -0.01               R.IDPIR.S ``` | |

|  |  |
| --- | --- |
| |  | | --- | | Top scoring peptide matches to query 522 36: Scan 290 (rt=17.8422, f=3, i=10) [\\172.16.3.18\masslynx\2009.PRO\Data\20090825\_06\_qdda.raw] Score greater than 20 indicates homology Score greater than 26 indicates identity  ``` Score    Expect   Delta  Hit  Protein Peptide  14.0      0.85   -0.01    5   P02647 VEPLR   7.0       4.2   -0.01               K.DLPIR.K   7.0       4.2   -0.01               DLPLR   7.0       4.2   -0.01               R.EVPLR.C   7.0       4.2   -0.01               R.IDPIR.S   7.0       4.2   -0.01               LDPLR   6.0       5.4    0.01               K.MPPLR.K   5.3       6.4   -0.01               K.DILPR.H   5.3       6.4   -0.01               DLLPR   5.3       6.4   -0.01               R.EVIPR.S ``` | |

|  |  |
| --- | --- |
| |  | | --- | | Top scoring peptide matches to query 526 17: Sum of 2 scans in range 157 (rt=12.1409, f=4, i=7) to 163 (rt=12.4396, f=4, i=8) [\\172.16.3.18\masslynx\2009.PRO\Data\20090825\_34\_qdda.raw] Score greater than 28 indicates homology Score greater than 30 indicates identity  ``` Score    Expect   Delta  Hit  Protein Peptide  24.1      0.22   -0.09   34   P02649 R.GLSAIR.E  14.4         2   -0.05               GLSSPR  13.4       2.5   -0.09               R.VASALR.S  12.3       3.3   -0.09               R.GLTGLR.L   6.4        13   -0.05               R.AGEALR.G   5.9        15   -0.09               R.GILASR.S   5.9        15   -0.06               GIRDR   5.9        15   -0.06               GLDRR   5.9        15   -0.05               M.GLEAAR.E   5.1        17   -0.05               R.VASPSR.K ``` | |

|  |  |
| --- | --- |
| |  | | --- | | Top scoring peptide matches to query 527 39: Sum of 2 scans in range 226 (rt=15.425, f=3, i=16) to 232 (rt=15.7237, f=3, i=17) [\\172.16.3.18\masslynx\2009.PRO\Data\20090825\_26\_qdda.raw] Score greater than 26 indicates homology Score greater than 30 indicates identity  ``` Score    Expect   Delta  Hit  Protein Peptide  21.7      0.38   -0.07   34   P02649 R.GLSAIR.E  11.8       3.7   -0.03               GLSSPR  10.8       4.7   -0.07               R.VASALR.S   8.7       7.5   -0.07               R.GLTGLR.L   5.8        15   -0.03               R.AGEALR.G   5.8        15   -0.03               QEAIR   5.8        15   -0.03               QEALR   4.5        20   -0.07               K.GAVTLR.A   0.8        47   -0.03               M.GSLPSR.R   0.8        47   -0.03               R.GSLSPR.S ``` | |

|  |  |
| --- | --- |
| |  | | --- | | Top scoring peptide matches to query 531 38: Sum of 4 scans in range 187 (rt=13.6667, f=5, i=12) to 216 (rt=15.0709, f=4, i=14) [\\172.16.3.18\masslynx\2009.PRO\Data\20090828\_20\_qdda.raw] Score greater than 13 indicates homology Score greater than 30 indicates identity  ``` Score    Expect   Delta  Hit  Protein Peptide   6.6        12    0.02   34   P02649 R.GLSAIR.E   6.6        12    0.06               GLSSPR   0.6        49    0.06               R.GDGVLR.T   0.6        49    0.13               R.GGDPDR.C   0.2        53    0.02               M.AASIVR.R   0.2        53    0.02               R.AASVLR.M ``` | |

|  |  |
| --- | --- |
| |  | | --- | | Top scoring peptide matches to query 564 91: Scan 355 (rt=21.6098, f=6, i=25) [\\172.16.3.18\masslynx\2009.PRO\Data\20090825\_18\_qdda.raw] Score greater than 23 indicates homology Score greater than 29 indicates identity  ``` Score    Expect   Delta  Hit  Protein Peptide  15.4       1.2   -0.05    8   P00450 VFNPR  10.0       4.1   -0.05               R.VNFPR.S   6.9       8.5    0.00               R.VENDR.E   4.8        14    0.04               R.GCGPPR.R   4.8        14    0.04               K.NCPPR.V ``` | |

|  |  |
| --- | --- |
| |  | | --- | | Top scoring peptide matches to query 565 13: Sum of 3 scans in range 116 (rt=10.1977, f=4, i=4) to 123 (rt=10.5462, f=7, i=3) [\\172.16.3.18\masslynx\2009.PRO\Data\20090821\_17\_qdda.raw] Score greater than 23 indicates homology Score greater than 29 indicates identity  ``` Score    Expect   Delta  Hit  Protein Peptide  12.7       2.2   -0.03               R.VVDSGR.S  12.6       2.3   -0.03    4   P04114 R.EVTQR.L   9.9       4.3   -0.03               R.EVSAAR.E   9.1       5.2    0.01               R.EAEAGR.L   8.0       6.6   -0.03               R.EVAGTR.V   8.0       6.6   -0.03               R.VVGDSR.C   8.0       6.6   -0.07               R.VVTSAR.E   7.1       8.2   -0.02               R.EVNSAI.-   6.0        11   -0.03               K.EISAGR.I   4.3        15    0.01               R.ESPSGR.L ``` | |

|  |  |
| --- | --- |
| |  | | --- | | Top scoring peptide matches to query 568 20: Sum of 2 scans in range 165 (rt=12.5221, f=5, i=9) to 171 (rt=12.8208, f=5, i=10) [\\172.16.3.18\masslynx\2009.PRO\Data\20090825\_30\_qdda.raw] Score greater than 25 indicates homology Score greater than 27 indicates identity  ``` Score    Expect   Delta  Hit  Protein Peptide  19.1      0.34   -0.12   16   P02790 FDPVR  12.1       1.7   -0.11               K.CIPVR.D  12.1       1.7   -0.09               K.DMPVR.S  12.1       1.7   -0.11               R.LCVPR.S ``` | |

|  |  |
| --- | --- |
| |  | | --- | | Top scoring peptide matches to query 569 31: Sum of 2 scans in range 195 (rt=14.1425, f=6, i=16) to 201 (rt=14.4411, f=6, i=17) [\\172.16.3.18\masslynx\2009.PRO\Data\20090824\_21\_qdda.raw] Score greater than 22 indicates homology Score greater than 27 indicates identity  ``` Score    Expect   Delta  Hit  Protein Peptide  15.2      0.83   -0.12   16   P02790 FDPVR   9.2       3.3   -0.10               K.CIPVR.D   9.2       3.3   -0.09               K.DMPVR.S   9.2       3.3   -0.10               R.LCVPR.S ``` | |

|  |  |
| --- | --- |
| |  | | --- | | Top scoring peptide matches to query 570 23: Sum of 2 scans in range 183 (rt=13.5299, f=4, i=14) to 189 (rt=13.8286, f=4, i=15) [\\172.16.3.18\masslynx\2009.PRO\Data\20090821\_29\_qdda.raw] Score greater than 24 indicates homology Score greater than 27 indicates identity  ``` Score    Expect   Delta  Hit  Protein Peptide  17.4      0.49   -0.10   16   P02790 FDPVR  10.5       2.4   -0.09               K.CIPVR.D  10.5       2.4   -0.07               K.DMPVR.S  10.0       2.7   -0.09               R.LCVPR.S   0.9        22   -0.09               R.GGMRGR.G   0.9        22   -0.09               K.GMGRGR.G   0.9        22   -0.11               R.GSTGRR.H ``` | |

|  |  |
| --- | --- |
| |  | | --- | | Top scoring peptide matches to query 571 47: Sum of 2 scans in range 259 (rt=17.0268, f=5, i=24) to 265 (rt=17.3254, f=5, i=25) [\\172.16.3.18\masslynx\2009.PRO\Data\20090825\_26\_qdda.raw] Score greater than 17 indicates homology Score greater than 27 indicates identity  ``` Score    Expect   Delta  Hit  Protein Peptide   8.6       3.8   -0.09               R.LCVPR.S   3.8        11   -0.10               K.FVDPR.F   1.9        18   -0.10   16   P02790 FDPVR ``` | |

|  |  |
| --- | --- |
| |  | | --- | | Top scoring peptide matches to query 574 26: Sum of 2 scans in range 191 (rt=13.8071, f=4, i=11) to 197 (rt=14.1058, f=4, i=12) [\\172.16.3.18\masslynx\2009.PRO\Data\20090825\_34\_qdda.raw] Score greater than 17 indicates homology Score greater than 27 indicates identity  ``` Score    Expect   Delta  Hit  Protein Peptide   4.3        10   -0.09   16   P02790 FDPVR ``` | |

|  |  |
| --- | --- |
| |  | | --- | | Top scoring peptide matches to query 575 36: Sum of 2 scans in range 175 (rt=13.1776, f=3, i=29) to 181 (rt=13.4763, f=3, i=30) [\\172.16.3.18\masslynx\2009.PRO\Data\20090828\_28\_qdda.raw] Score greater than 18 indicates homology Score greater than 27 indicates identity  ``` Score    Expect   Delta  Hit  Protein Peptide  15.2      0.84   -0.07               K.CIPVR.D  15.2      0.84   -0.05               K.DMPVR.S  15.2      0.84   -0.08   16   P02790 FDPVR   5.0       8.7   -0.03               K.EDDVR.Q   3.1        13   -0.16               R.FIVVR.E   3.1        13   -0.16               R.FVLVR.S   3.1        13   -0.12               R.MVLVR.N   0.1        27   -0.07               R.LCVPR.S ``` | |

|  |  |
| --- | --- |
| |  | | --- | | Top scoring peptide matches to query 576 112: Sum of 2 scans in range 417 (rt=24.6305, f=2, i=64) to 423 (rt=24.9292, f=2, i=65) [\\172.16.3.18\masslynx\2009.PRO\Data\20090825\_18\_qdda.raw] Score greater than 14 indicates homology Score greater than 27 indicates identity  ``` Score    Expect   Delta  Hit  Protein Peptide   1.8        18   -0.03   53   P02452 R.AEGNSR.F   1.6        19   -0.08               AGSRSR ``` | |

|  |  |
| --- | --- |
| |  | | --- | | Top scoring peptide matches to query 578 63: Sum of 3 scans in range 307 (rt=19.3374, f=6, i=24) to 313 (rt=19.6289, f=6, i=26) [\\172.16.3.18\masslynx\2009.PRO\Data\20090825\_22\_qdda.raw] Score greater than 22 indicates homology Score greater than 27 indicates identity  ``` Score    Expect   Delta  Hit  Protein Peptide  15.4      0.79   -0.06   16   P02790 FDPVR   8.3       4.1   -0.05               K.CIPVR.D   8.3       4.1   -0.03               K.DMPVR.S   6.0       6.9   -0.13               R.FVLVR.S   6.0       6.9   -0.10               R.MVLVR.N   3.8        11   -0.05               R.LCVPR.S ``` | |

|  |  |
| --- | --- |
| |  | | --- | | Top scoring peptide matches to query 579 44: Sum of 3 scans in range 259 (rt=17.0999, f=6, i=19) to 266 (rt=17.4411, f=6, i=21) [\\172.16.3.18\masslynx\2009.PRO\Data\20090824\_29\_qdda.raw] Score greater than 21 indicates homology Score greater than 27 indicates identity  ``` Score    Expect   Delta  Hit  Protein Peptide  10.5       2.4   -0.06   16   P02790 FDPVR   7.6       4.8   -0.04               R.LCVPR.S   4.0        11   -0.02               K.DMPVR.S   3.2        13   -0.04               K.CIPVR.D   2.1        17   -0.06               K.FVDPR.F ``` | |

|  |  |
| --- | --- |
| |  | | --- | | Top scoring peptide matches to query 581 85: Scan 341 (rt=20.9261, f=4, i=27) [\\172.16.3.18\masslynx\2009.PRO\Data\20090825\_18\_qdda.raw] Score greater than 22 indicates homology Score greater than 27 indicates identity  ``` Score    Expect   Delta  Hit  Protein Peptide  17.6      0.47   -0.05   16   P02790 FDPVR   9.2       3.3   -0.03               K.CIPVR.D   9.2       3.3   -0.01               K.DMPVR.S   6.4       6.2   -0.03               R.LCVPR.S ``` | |

|  |  |
| --- | --- |
| |  | | --- | | Top scoring peptide matches to query 582 82: Sum of 3 scans in range 358 (rt=21.6562, f=7, i=31) to 364 (rt=21.9477, f=7, i=33) [\\172.16.3.18\masslynx\2009.PRO\Data\20090824\_37\_qdda.raw] Score greater than 27 indicates identity  ``` Score    Expect   Delta  Hit  Protein Peptide  22.1      0.17   -0.05   16   P02790 FDPVR  13.0       1.4   -0.03               K.CIPVR.D  13.0       1.4   -0.01               K.DMPVR.S   3.3        13   -0.03               R.LCVPR.S   2.7        15   -0.12               R.FIVVR.E   2.7        15   -0.12               R.FVLVR.S   2.7        15   -0.09               R.MVLVR.N ``` | |

|  |  |
| --- | --- |
| |  | | --- | | Top scoring peptide matches to query 585 73: Sum of 3 scans in range 368 (rt=22.0559, f=7, i=25) to 375 (rt=22.3971, f=7, i=27) [\\172.16.3.18\masslynx\2009.PRO\Data\20090825\_14\_qdda.raw] Score greater than 26 indicates homology Score greater than 27 indicates identity  ``` Score    Expect   Delta  Hit  Protein Peptide  17.4      0.49   -0.04   16   P02790 FDPVR  12.6       1.5   -0.03               K.CIPVR.D  12.6       1.5   -0.01               K.DMPVR.S   3.6        12   -0.03               R.LCVPR.S   2.1        17   -0.08               R.MVLVR.N   0.9        22    0.01               K.EDDVR.Q ``` | |

|  |  |
| --- | --- |
| |  | | --- | | Top scoring peptide matches to query 586 70: Sum of 3 scans in range 381 (rt=22.3513, f=2, i=77) to 388 (rt=22.6926, f=2, i=79) [\\172.16.3.18\masslynx\2009.PRO\Data\20090825\_10\_qdda.raw] Score greater than 22 indicates homology Score greater than 27 indicates identity  ``` Score    Expect   Delta  Hit  Protein Peptide  15.4      0.79   -0.04   16   P02790 FDPVR   8.8       3.6   -0.00               K.DMPVR.S   7.9       4.5   -0.02               K.CIPVR.D   7.5       4.9   -0.02               R.LCVPR.S ``` | |

|  |  |
| --- | --- |
| |  | | --- | | Top scoring peptide matches to query 588 79: Scan 402 (rt=23.221, f=3, i=22) [\\172.16.3.18\masslynx\2009.PRO\Data\20090825\_06\_qdda.raw] Score greater than 14 indicates homology Score greater than 27 indicates identity  ``` Score    Expect   Delta  Hit  Protein Peptide   8.8       3.6   -0.02   16   P02790 FDPVR   0.6        24   -0.01               K.CIPVR.D   0.6        24    0.01               K.DMPVR.S   0.6        24   -0.01               R.LCVPR.S ``` | |

|  |  |
| --- | --- |
| |  | | --- | | Top scoring peptide matches to query 589 34: Sum of 3 scans in range 157 (rt=12.241, f=3, i=16) to 175 (rt=13.124, f=6, i=16) [\\172.16.3.18\masslynx\2009.PRO\Data\20090828\_24\_qdda.raw] Score greater than 20 indicates homology Score greater than 27 indicates identity  ``` Score    Expect   Delta  Hit  Protein Peptide  10.3       2.6   -0.01               K.CIPVR.D  10.3       2.6    0.01               K.DMPVR.S  10.3       2.6   -0.02   16   P02790 FDPVR   7.4         5   -0.01               R.LCVPR.S   4.4        10   -0.03               R.ASGSRR.G   3.5        12   -0.03               R.TGSGRR.C   1.6        19   -0.06               VMLVR   0.3        25    0.03               K.DVDER.N   0.3        25   -0.00               ITDER   0.3        25    0.02               R.NTNER.R ``` | |

|  |  |
| --- | --- |
| |  | | --- | | Top scoring peptide matches to query 590 92: Scan 354 (rt=21.5984, f=4, i=24) [\\172.16.3.18\masslynx\2009.PRO\Data\20090828\_04\_qdda.raw] Score greater than 17 indicates homology Score greater than 27 indicates identity  ``` Score    Expect   Delta  Hit  Protein Peptide   4.7       9.4   -0.00               K.CIPVR.D   4.7       9.4    0.01               K.DMPVR.S   4.7       9.4   -0.02   16   P02790 FDPVR ``` | |

|  |  |
| --- | --- |
| |  | | --- | | Top scoring peptide matches to query 595 53: Sum of 3 scans in range 293 (rt=18.6597, f=3, i=32) to 312 (rt=19.5791, f=3, i=34) [\\172.16.3.18\masslynx\2009.PRO\Data\20090828\_08\_qdda.raw] Score greater than 13 indicates homology Score greater than 27 indicates identity  ``` Score    Expect   Delta  Hit  Protein Peptide   2.4        16   -0.00   16   P02790 FDPVR   0.1        27    0.01               K.CIPVR.D   0.1        27    0.03               K.DMPVR.S ``` | |

|  |  |
| --- | --- |
| |  | | --- | | Top scoring peptide matches to query 597 47: Sum of 5 scans in range 255 (rt=16.9262, f=5, i=16) to 296 (rt=18.9143, f=7, i=24) [\\172.16.3.18\masslynx\2009.PRO\Data\20090828\_12\_qdda.raw] Score greater than 13 indicates homology Score greater than 27 indicates identity  ``` Score    Expect   Delta  Hit  Protein Peptide   0.8        23    0.00   16   P02790 FDPVR ``` | |

|  |  |
| --- | --- |
| |  | | --- | | Top scoring peptide matches to query 598 46: Sum of 4 scans in range 226 (rt=15.5555, f=4, i=15) to 248 (rt=16.6241, f=5, i=19) [\\172.16.3.18\masslynx\2009.PRO\Data\20090828\_20\_qdda.raw] Score greater than 20 indicates homology Score greater than 27 indicates identity  ``` Score    Expect   Delta  Hit  Protein Peptide   9.3       3.2    0.01   16   P02790 FDPVR   6.8       5.7    0.02               K.CIPVR.D   6.8       5.7    0.04               K.DMPVR.S   0.3        26    0.02               R.LCVPR.S ``` | |

|  |  |
| --- | --- |
| |  | | --- | | Top scoring peptide matches to query 599 54: Sum of 3 scans in range 275 (rt=17.899, f=6, i=27) to 295 (rt=18.8682, f=4, i=21) [\\172.16.3.18\masslynx\2009.PRO\Data\20090828\_16\_qdda.raw] Score greater than 17 indicates homology Score greater than 27 indicates identity  ``` Score    Expect   Delta  Hit  Protein Peptide   8.5       3.9    0.01   16   P02790 FDPVR   3.6        12    0.04               K.DMPVR.S   0.4        25    0.02               K.CIPVR.D   0.4        25    0.02               R.LCVPR.S ``` | |

|  |  |
| --- | --- |
| |  | | --- | | Top scoring peptide matches to query 635 101: Sum of 2 scans in range 464 (rt=27.0801, f=6, i=50) to 470 (rt=27.3788, f=6, i=51) [\\172.16.3.18\masslynx\2009.PRO\Data\20090825\_26\_qdda.raw] Score greater than 26 indicates homology Score greater than 28 indicates identity  ``` Score    Expect   Delta  Hit  Protein Peptide  17.8      0.62   -0.18    1   P01023 K.VIFIR.G  17.8      0.62   -0.18               VLFLR  17.8      0.62   -0.15               R.VLMLR.N  12.4       2.1   -0.11               VIMER  12.4       2.1   -0.11               R.VLMER.N  11.3       2.7   -0.18               R.VIIFR.L  11.3       2.7   -0.18               VLLFR  10.2       3.5   -0.15               K.IVMIR.D  10.2       3.5   -0.18               K.LVFIR.N   9.8       3.9   -0.11               K.VLEMR.G ``` | |

|  |  |
| --- | --- |
| |  | | --- | | Top scoring peptide matches to query 636 74: Sum of 2 scans in range 404 (rt=24.4014, f=2, i=69) to 410 (rt=24.7001, f=2, i=70) [\\172.16.3.18\masslynx\2009.PRO\Data\20090824\_25\_qdda.raw] Score greater than 28 indicates identity  ``` Score    Expect   Delta  Hit  Protein Peptide  20.9       0.3   -0.18    1   P01023 K.VIFIR.G  20.9       0.3   -0.18               VLFLR  20.9       0.3   -0.14               R.VLMLR.N  14.5       1.3   -0.18               R.VIIFR.L  14.5       1.3   -0.11               VIMER  14.5       1.3   -0.11               K.VLEMR.G  14.5       1.3   -0.18               VLLFR  14.5       1.3   -0.11               R.VLMER.N  14.5       1.3   -0.14               R.VLYPR.V  13.4       1.7   -0.14               K.IVMIR.D ``` | |

|  |  |
| --- | --- |
| |  | | --- | | Top scoring peptide matches to query 640 96: Sum of 2 scans in range 455 (rt=26.8703, f=3, i=56) to 461 (rt=27.169, f=3, i=57) [\\172.16.3.18\masslynx\2009.PRO\Data\20090821\_21\_qdda.raw] Score greater than 25 indicates homology Score greater than 28 indicates identity  ``` Score    Expect   Delta  Hit  Protein Peptide  17.8      0.62   -0.15    1   P01023 K.VIFIR.G  17.8      0.62   -0.15               VLFLR  17.8      0.62   -0.12               R.VLMLR.N  11.3       2.8   -0.15               R.VIIFR.L  11.3       2.8   -0.15               VLLFR  10.1       3.6   -0.12               K.IVMIR.D  10.1       3.6   -0.15               K.LVFIR.N   9.8       3.8   -0.08               VIMER   9.8       3.8   -0.08               K.VLEMR.G   9.8       3.8   -0.08               R.VLMER.N ``` | |

|  |  |
| --- | --- |
| |  | | --- | | Top scoring peptide matches to query 644 114: Sum of 2 scans in range 426 (rt=25.4076, f=7, i=54) to 432 (rt=25.7063, f=7, i=55) [\\172.16.3.18\masslynx\2009.PRO\Data\20090828\_24\_qdda.raw] Score greater than 25 indicates homology Score greater than 28 indicates identity  ``` Score    Expect   Delta  Hit  Protein Peptide  15.0       1.2   -0.13    1   P01023 K.VIFIR.G  15.0       1.2   -0.13               VLFLR  15.0       1.2   -0.10               R.VLMLR.N  11.4       2.7   -0.06               VIMER  11.4       2.7   -0.06               R.VLMER.N   7.4       6.7   -0.13               R.VIIFR.L   7.4       6.7   -0.13               VLLFR   7.0       7.3   -0.10               K.IVMIR.D   7.0       7.3   -0.13               K.LVFIR.N   6.7         8   -0.13               K.VFIIR.K ``` | |

|  |  |
| --- | --- |
| |  | | --- | | Top scoring peptide matches to query 645 130: Sum of 2 scans in range 500 (rt=28.8919, f=2, i=75) to 506 (rt=29.1906, f=2, i=76) [\\172.16.3.18\masslynx\2009.PRO\Data\20090824\_33\_qdda.raw] Score greater than 25 indicates homology Score greater than 28 indicates identity  ``` Score    Expect   Delta  Hit  Protein Peptide  22.8      0.19   -0.13    1   P01023 K.VIFIR.G  22.8      0.19   -0.13               VLFLR  22.8      0.19   -0.09               R.VLMLR.N  11.4       2.7   -0.13               R.VIIFR.L  11.4       2.7   -0.13               VLLFR  10.9         3   -0.06               R.VEMIR.Q  10.9         3   -0.06               K.VEMLR.L  10.9         3   -0.13               K.VFIIR.K  10.9         3   -0.13               K.VFLLR.R  10.9         3   -0.09               R.VMIIR.T ``` | |

|  |  |
| --- | --- |
| |  | | --- | | Top scoring peptide matches to query 647 79: Sum of 4 scans in range 400 (rt=24.1341, f=3, i=43) to 417 (rt=24.9803, f=3, i=46) [\\172.16.3.18\masslynx\2009.PRO\Data\20090820\_17\_\_\_qdda.raw] Score greater than 25 indicates homology Score greater than 28 indicates identity  ``` Score    Expect   Delta  Hit  Protein Peptide  17.6      0.64   -0.12    1   P01023 K.VIFIR.G  17.6      0.64   -0.12               VLFLR  17.6      0.64   -0.09               R.VLMLR.N  11.1       2.9   -0.12               R.VIIFR.L  11.1       2.9   -0.12               VLLFR  10.3       3.5   -0.09               K.IVMIR.D  10.3       3.5   -0.12               K.LVFIR.N   9.6       4.1   -0.05               VIMER   9.6       4.1   -0.05               K.VLEMR.G   9.6       4.1   -0.05               R.VLMER.N ``` | |

|  |  |
| --- | --- |
| |  | | --- | | Top scoring peptide matches to query 649 100: Sum of 2 scans in range 478 (rt=27.8162, f=2, i=78) to 484 (rt=28.1149, f=2, i=79) [\\172.16.3.18\masslynx\2009.PRO\Data\20090824\_29\_qdda.raw] Score greater than 28 indicates identity  ``` Score    Expect   Delta  Hit  Protein Peptide  20.6      0.32   -0.12    1   P01023 K.VIFIR.G  20.6      0.32   -0.12               VLFLR  20.6      0.32   -0.08               R.VLMLR.N  14.1       1.4   -0.12               R.VIIFR.L  14.1       1.4   -0.05               VIMER  14.1       1.4   -0.05               K.VLEMR.G  14.1       1.4   -0.12               VLLFR  14.1       1.4   -0.05               R.VLMER.N  14.1       1.4   -0.08               R.VLYPR.V  12.9       1.9   -0.08               K.IVMIR.D ``` | |

|  |  |
| --- | --- |
| |  | | --- | | Top scoring peptide matches to query 650 80: Sum of 2 scans in range 390 (rt=23.6049, f=3, i=43) to 396 (rt=23.9036, f=3, i=44) [\\172.16.3.18\masslynx\2009.PRO\Data\20090824\_13\_qdda.raw] Score greater than 26 indicates homology Score greater than 28 indicates identity  ``` Score    Expect   Delta  Hit  Protein Peptide  19.5      0.42   -0.11    1   P01023 K.VIFIR.G  19.5      0.42   -0.11               VLFLR  19.5      0.42   -0.07               R.VLMLR.N  12.0       2.3   -0.11               R.VIIFR.L  12.0       2.3   -0.04               VIMER  12.0       2.3   -0.04               K.VLEMR.G  12.0       2.3   -0.11               VLLFR  12.0       2.3   -0.04               R.VLMER.N  12.0       2.3   -0.07               R.VLYPR.V  11.9       2.4   -0.07               K.IVMIR.D ``` | |

|  |  |
| --- | --- |
| |  | | --- | | Top scoring peptide matches to query 651 140: Sum of 2 scans in range 530 (rt=30.0396, f=2, i=85) to 536 (rt=30.3383, f=2, i=86) [\\172.16.3.18\masslynx\2009.PRO\Data\20090824\_37\_qdda.raw] Score greater than 28 indicates identity  ``` Score    Expect   Delta  Hit  Protein Peptide  20.6      0.32   -0.10    1   P01023 K.VIFIR.G  20.6      0.32   -0.10               VLFLR  20.6      0.32   -0.07               R.VLMLR.N  14.1       1.5   -0.10               R.VIIFR.L  14.1       1.5   -0.03               VIMER  14.1       1.5   -0.03               K.VLEMR.G  14.1       1.5   -0.10               VLLFR  14.1       1.5   -0.03               R.VLMER.N  14.1       1.5   -0.07               R.VLYPR.V  12.9       1.9   -0.07               K.IVMIR.D ``` | |

|  |  |
| --- | --- |
| |  | | --- | | Top scoring peptide matches to query 652 72: Sum of 2 scans in range 391 (rt=23.7666, f=5, i=51) to 397 (rt=24.0653, f=5, i=52) [\\172.16.3.18\masslynx\2009.PRO\Data\20090821\_29\_qdda.raw] Score greater than 14 indicates homology Score greater than 28 indicates identity  ``` Score    Expect   Delta  Hit  Protein Peptide   2.3        22   -0.02               VIMER   2.3        22   -0.02               R.VLMER.N   1.1        29   -0.09    1   P01023 K.VIFIR.G   1.1        29   -0.09               VLFLR   1.1        29   -0.06               R.VLMLR.N ``` | |

|  |  |
| --- | --- |
| |  | | --- | | Top scoring peptide matches to query 653 107: Sum of 4 scans in range 478 (rt=27.9479, f=2, i=71) to 496 (rt=28.8439, f=2, i=74) [\\172.16.3.18\masslynx\2009.PRO\Data\20090821\_17\_qdda.raw] Score greater than 25 indicates homology Score greater than 28 indicates identity  ``` Score    Expect   Delta  Hit  Protein Peptide  17.6      0.65   -0.09    1   P01023 K.VIFIR.G  17.6      0.65   -0.09               VLFLR  17.6      0.65   -0.06               R.VLMLR.N  11.1       2.9   -0.09               R.VIIFR.L  11.1       2.9   -0.09               VLLFR   9.9       3.7   -0.06               K.IVMIR.D   9.9       3.7   -0.09               K.LVFIR.N   9.6       4.1   -0.02               VIMER   9.6       4.1   -0.02               K.VLEMR.G   9.6       4.1   -0.02               R.VLMER.N ``` | |

|  |  |
| --- | --- |
| |  | | --- | | Top scoring peptide matches to query 655 111: Sum of 2 scans in range 525 (rt=30.0701, f=2, i=89) to 531 (rt=30.3688, f=2, i=90) [\\172.16.3.18\masslynx\2009.PRO\Data\20090821\_13\_qdda.raw] Score greater than 24 indicates homology Score greater than 28 indicates identity  ``` Score    Expect   Delta  Hit  Protein Peptide  17.5      0.66   -0.08    1   P01023 K.VIFIR.G  17.5      0.66   -0.08               VLFLR  17.5      0.66   -0.05               R.VLMLR.N  10.7       3.2   -0.05               K.IVMIR.D  10.7       3.2   -0.08               K.LVFIR.N  10.5       3.3   -0.01               R.VEMIR.Q  10.5       3.3   -0.01               K.VEMLR.L  10.5       3.3   -0.08               K.VFIIR.K  10.5       3.3   -0.08               K.VFLLR.R  10.5       3.3   -0.05               R.VMIIR.T ``` | |

|  |  |
| --- | --- |
| |  | | --- | | Top scoring peptide matches to query 657 134: Sum of 5 scans in range 547 (rt=31.0828, f=2, i=112) to 578 (rt=32.5927, f=6, i=67) [\\172.16.3.18\masslynx\2009.PRO\Data\20090821\_09\_qdda.raw] Score greater than 26 indicates homology Score greater than 28 indicates identity  ``` Score    Expect   Delta  Hit  Protein Peptide  18.0      0.58   -0.05    1   P01023 K.VIFIR.G  18.0      0.58   -0.05               VLFLR  18.0      0.58   -0.01               R.VLMLR.N  12.6       2.1   -0.05               R.VIIFR.L  12.6       2.1    0.02               VIMER  12.6       2.1    0.02               K.VLEMR.G  12.6       2.1   -0.05               VLLFR  12.6       2.1    0.02               R.VLMER.N  12.6       2.1   -0.01               R.VLYPR.V  10.6       3.2   -0.01               K.IVMIR.D ``` | |

|  |  |
| --- | --- |
| |  | | --- | | Top scoring peptide matches to query 659 143: Scan 555 (rt=31.0377, f=4, i=49) [\\172.16.3.18\masslynx\2009.PRO\Data\20090824\_41\_qdda.raw] Score greater than 26 indicates homology Score greater than 28 indicates identity  ``` Score    Expect   Delta  Hit  Protein Peptide  15.7         1   -0.03    1   P01023 K.VIFIR.G  15.7         1   -0.03               VLFLR  15.7         1    0.00               R.VLMLR.N  12.3       2.2   -0.03               R.VIIFR.L  12.3       2.2   -0.03               VLLFR  10.4       3.3    0.04               VIMER  10.4       3.3    0.04               K.VLEMR.G  10.4       3.3    0.04               R.VLMER.N  10.4       3.3    0.00               R.VLYPR.V   8.6       5.1    0.00               K.IVMIR.D ``` | |

|  |  |
| --- | --- |
| |  | | --- | | Top scoring peptide matches to query 661 140: Sum of 3 scans in range 560 (rt=31.0766, f=5, i=43) to 565 (rt=31.3183, f=5, i=45) [\\172.16.3.18\masslynx\2009.PRO\Data\20090825\_10\_qdda.raw] Score greater than 23 indicates homology Score greater than 28 indicates identity  ``` Score    Expect   Delta  Hit  Protein Peptide  15.4       1.1   -0.03    1   P01023 K.VIFIR.G  15.4       1.1   -0.03               VLFLR  15.4       1.1    0.00               R.VLMLR.N   9.2       4.4   -0.03               R.VIIFR.L   9.2       4.4    0.04               VIMER   9.2       4.4    0.04               K.VLEMR.G   9.2       4.4   -0.03               VLLFR   9.2       4.4    0.04               R.VLMER.N   9.2       4.4    0.01               R.VLYPR.V   8.8       4.8    0.00               K.IVMIR.D ``` | |

|  |  |
| --- | --- |
| |  | | --- | | Top scoring peptide matches to query 662 140: Sum of 3 scans in range 561 (rt=31.164, f=3, i=58) to 583 (rt=32.2327, f=4, i=44) [\\172.16.3.18\masslynx\2009.PRO\Data\20090824\_45\_qdda.raw] Score greater than 25 indicates homology Score greater than 28 indicates identity  ``` Score    Expect   Delta  Hit  Protein Peptide  15.4       1.1   -0.03    1   P01023 K.VIFIR.G  15.4       1.1   -0.03               VLFLR  15.4       1.1    0.00               R.VLMLR.N  12.0       2.3   -0.03               R.VIIFR.L  12.0       2.3   -0.03               VLLFR  10.4       3.4    0.04               VIMER  10.4       3.4    0.04               K.VLEMR.G  10.4       3.4    0.04               R.VLMER.N  10.4       3.4    0.01               R.VLYPR.V   8.6       5.1    0.00               K.IVMIR.D ``` | |

|  |  |
| --- | --- |
| |  | | --- | | Top scoring peptide matches to query 664 135: Sum of 3 scans in range 596 (rt=33.4235, f=4, i=54) to 614 (rt=34.3067, f=3, i=82) [\\172.16.3.18\masslynx\2009.PRO\Data\20090821\_05\_qdda.raw] Score greater than 21 indicates homology Score greater than 28 indicates identity  ``` Score    Expect   Delta  Hit  Protein Peptide  11.9       2.4    0.05               VIMER  11.9       2.4    0.05               R.VLMER.N  11.5       2.6   -0.02    1   P01023 K.VIFIR.G  11.5       2.6   -0.02               VLFLR  11.5       2.6    0.01               R.VLMLR.N   7.9         6   -0.02               R.VIIFR.L   7.9         6   -0.02               VLLFR   6.6       8.1    0.05               K.VLEMR.G   6.6       8.1    0.02               R.VLYPR.V   6.5       8.3   -0.02               K.VFIIR.K ``` | |

|  |  |
| --- | --- |
| |  | | --- | | Top scoring peptide matches to query 665 216: Sum of 8 scans in range 1704 (rt=88.4175, f=4, i=207) to 1749 (rt=90.6515, f=4, i=214) [\\172.16.3.18\masslynx\2009.PRO\Data\20090908\_09\_qdda.raw] Score greater than 25 indicates homology Score greater than 28 indicates identity  ``` Score    Expect   Delta  Hit  Protein Peptide  18.0      0.58    0.03    1   P01023 K.VIFIR.G  18.0      0.58    0.03               VLFLR  11.5       2.6    0.03               R.VIIFR.L  11.5       2.6    0.03               VLLFR  10.0       3.6    0.03               K.LVFIR.N   8.2       5.5    0.06               R.VLMLR.N   7.1       7.1    0.03               K.VFIIR.K   7.1       7.1    0.03               K.VFLLR.R   5.1        11    0.06               K.IVMIR.D   3.6        16    0.07               R.VLYPR.V ``` | |

|  |  |
| --- | --- |
| |  | | --- | | Top scoring peptide matches to query 699 54: Sum of 2 scans in range 296 (rt=18.9437, f=2, i=41) to 302 (rt=19.2424, f=2, i=42) [\\172.16.3.18\masslynx\2009.PRO\Data\20090825\_30\_qdda.raw] Score greater than 16 indicates homology Score greater than 25 indicates identity  ``` Score    Expect   Delta  Hit  Protein Peptide   4.5         6   -0.10    2   P01024 K.LLPVGR.T   3.5       7.6    0.00               K.HVNER.F   2.7       9.1   -0.02               LPPDGR   2.3        10   -0.11               R.IIPRR.F   2.3        10   -0.10               K.ILGVPR.S   2.3        10   -0.10               K.ILPGVR.I   2.3        10   -0.11               LLPRR   2.3        10   -0.11               LLRPR   2.1        11   -0.10               R.LPVLGR.D   0.2        16    0.00               R.GDIHGR.N ``` | |

|  |  |
| --- | --- |
| |  | | --- | | Top scoring peptide matches to query 700 74: Sum of 2 scans in range 362 (rt=22.2928, f=4, i=47) to 368 (rt=22.5915, f=4, i=48) [\\172.16.3.18\masslynx\2009.PRO\Data\20090821\_21\_qdda.raw] Score greater than 21 indicates homology Score greater than 25 indicates identity  ``` Score    Expect   Delta  Hit  Protein Peptide  13.3       0.8   -0.09    2   P01024 K.LLPVGR.T   8.5       2.4   -0.10               R.IIPRR.F   8.5       2.4   -0.09               K.ILGVPR.S   8.5       2.4   -0.09               K.ILPGVR.I   8.5       2.4   -0.10               LLPRR   8.5       2.4   -0.10               LLRPR ``` | |

|  |  |
| --- | --- |
| |  | | --- | | Top scoring peptide matches to query 701 91: Sum of 2 scans in range 391 (rt=23.4181, f=2, i=47) to 397 (rt=23.7167, f=2, i=48) [\\172.16.3.18\masslynx\2009.PRO\Data\20090825\_22\_qdda.raw] Score greater than 24 indicates homology Score greater than 25 indicates identity  ``` Score    Expect   Delta  Hit  Protein Peptide  15.4      0.49   -0.08    2   P01024 K.LLPVGR.T  10.3       1.6   -0.09               R.IIPRR.F  10.3       1.6   -0.08               K.ILPGVR.I  10.3       1.6   -0.09               LLPRR   8.8       2.3   -0.08               K.ILGVPR.S   8.8       2.3   -0.09               LLRPR   0.2        16    0.02               K.HVNER.F ``` | |

|  |  |
| --- | --- |
| |  | | --- | | Top scoring peptide matches to query 702 73: Sum of 2 scans in range 361 (rt=22.0183, f=2, i=49) to 367 (rt=22.3169, f=2, i=50) [\\172.16.3.18\masslynx\2009.PRO\Data\20090825\_26\_qdda.raw] Score greater than 15 indicates homology Score greater than 25 indicates identity  ``` Score    Expect   Delta  Hit  Protein Peptide   6.3       3.9   -0.08    2   P01024 K.LLPVGR.T   1.8        11   -0.09               R.IIPRR.F   1.8        11   -0.08               K.ILGVPR.S   1.8        11   -0.08               K.ILPGVR.I   1.8        11   -0.09               LLPRR   1.8        11   -0.09               LLRPR ``` | |

|  |  |
| --- | --- |
| |  | | --- | | Top scoring peptide matches to query 704 81: Sum of 2 scans in range 416 (rt=24.7371, f=4, i=46) to 422 (rt=25.0357, f=4, i=47) [\\172.16.3.18\masslynx\2009.PRO\Data\20090821\_13\_qdda.raw] Score greater than 20 indicates homology Score greater than 25 indicates identity  ``` Score    Expect   Delta  Hit  Protein Peptide  14.1      0.67   -0.07    2   P01024 K.LLPVGR.T   7.5         3   -0.08               R.IIPRR.F   7.5         3   -0.07               K.ILGVPR.S   7.5         3   -0.07               K.ILPGVR.I   7.5         3   -0.08               LLPRR   7.5         3   -0.08               LLRPR ``` | |

|  |  |
| --- | --- |
| |  | | --- | | Top scoring peptide matches to query 705 107: Sum of 3 scans in range 405 (rt=24.0463, f=2, i=62) to 422 (rt=24.8794, f=7, i=41) [\\172.16.3.18\masslynx\2009.PRO\Data\20090825\_18\_qdda.raw] Score greater than 20 indicates homology Score greater than 25 indicates identity  ``` Score    Expect   Delta  Hit  Protein Peptide  11.8       1.1   -0.06    2   P01024 K.LLPVGR.T   6.8       3.6   -0.07               R.IIPRR.F   6.8       3.6   -0.06               K.ILGVPR.S   6.8       3.6   -0.06               K.ILPGVR.I   6.8       3.6   -0.07               LLPRR   6.8       3.6   -0.07               LLRPR   3.4       7.7    0.01               LPPDGR   2.8       8.9   -0.06               K.IVPLGR.K   2.8       8.9   -0.06               R.LPVLGR.D ``` | |

|  |  |
| --- | --- |
| |  | | --- | | Top scoring peptide matches to query 706 106: Sum of 2 scans in range 429 (rt=25.118, f=4, i=40) to 435 (rt=25.4167, f=4, i=41) [\\172.16.3.18\masslynx\2009.PRO\Data\20090824\_37\_qdda.raw] Score greater than 15 indicates homology Score greater than 25 indicates identity  ``` Score    Expect   Delta  Hit  Protein Peptide   2.0        11   -0.07               R.IIPRR.F   2.0        11   -0.06               K.ILGVPR.S   2.0        11   -0.06               K.ILPGVR.I   2.0        11   -0.07               LLPRR   2.0        11   -0.06    2   P01024 K.LLPVGR.T   2.0        11   -0.07               LLRPR ``` | |

|  |  |
| --- | --- |
| |  | | --- | | Top scoring peptide matches to query 707 98: Sum of 2 scans in range 448 (rt=25.9522, f=2, i=78) to 454 (rt=26.2509, f=2, i=79) [\\172.16.3.18\masslynx\2009.PRO\Data\20090825\_14\_qdda.raw] Score greater than 14 indicates homology Score greater than 25 indicates identity  ``` Score    Expect   Delta  Hit  Protein Peptide   6.7       3.7   -0.06    2   P01024 K.LLPVGR.T   0.8        14   -0.07               R.IIPRR.F   0.8        14   -0.06               K.ILPGVR.I   0.8        14   -0.07               LLPRR ``` | |

|  |  |
| --- | --- |
| |  | | --- | | Top scoring peptide matches to query 708 97: Scan 396 (rt=23.8077, f=4, i=37) [\\172.16.3.18\masslynx\2009.PRO\Data\20090824\_33\_qdda.raw] Score greater than 23 indicates homology Score greater than 25 indicates identity  ``` Score    Expect   Delta  Hit  Protein Peptide  13.5      0.76    0.04               K.HVNER.F  10.4       1.6   -0.06    2   P01024 K.LLPVGR.T   6.1       4.1   -0.07               R.IIPRR.F   6.1       4.1   -0.06               K.ILGVPR.S   6.1       4.1   -0.06               K.ILPGVR.I   6.1       4.1   -0.07               LLPRR   6.1       4.1   -0.07               LLRPR ``` | |

|  |  |
| --- | --- |
| |  | | --- | | Top scoring peptide matches to query 710 102: Sum of 2 scans in range 453 (rt=25.8568, f=2, i=89) to 459 (rt=26.1555, f=2, i=90) [\\172.16.3.18\masslynx\2009.PRO\Data\20090825\_10\_qdda.raw] Score greater than 19 indicates homology Score greater than 25 indicates identity  ``` Score    Expect   Delta  Hit  Protein Peptide   7.4       3.1   -0.05    2   P01024 K.LLPVGR.T   6.2       4.1   -0.07               R.IIPRR.F   6.2       4.1   -0.05               K.ILPGVR.I   6.2       4.1   -0.07               LLPRR ``` | |

|  |  |
| --- | --- |
| |  | | --- | | Top scoring peptide matches to query 711 98: Sum of 2 scans in range 437 (rt=25.6988, f=3, i=50) to 443 (rt=25.9975, f=3, i=51) [\\172.16.3.18\masslynx\2009.PRO\Data\20090821\_09\_qdda.raw] Score greater than 14 indicates homology Score greater than 25 indicates identity  ``` Score    Expect   Delta  Hit  Protein Peptide   1.3        12   -0.05    2   P01024 K.LLPVGR.T ``` | |

|  |  |
| --- | --- |
| |  | | --- | | Top scoring peptide matches to query 712 71: Sum of 2 scans in range 303 (rt=19.3769, f=2, i=43) to 309 (rt=19.6755, f=2, i=44) [\\172.16.3.18\masslynx\2009.PRO\Data\20090828\_24\_qdda.raw] Score greater than 21 indicates homology Score greater than 25 indicates identity  ``` Score    Expect   Delta  Hit  Protein Peptide  12.1         1   -0.04    2   P01024 K.LLPVGR.T   7.5         3   -0.04               K.ILPGVR.I   3.6       7.4   -0.06               R.IIPRR.F   3.6       7.4   -0.06               LLPRR   1.8        11    0.05               R.GDIHGR.N   1.6        12   -0.04               K.ILGVPR.S   1.3        13   -0.06               LLRPR ``` | |

|  |  |
| --- | --- |
| |  | | --- | | Top scoring peptide matches to query 713 65: Sum of 2 scans in range 288 (rt=18.6922, f=3, i=38) to 294 (rt=18.9908, f=3, i=39) [\\172.16.3.18\masslynx\2009.PRO\Data\20090828\_32\_qdda.raw] Score greater than 20 indicates homology Score greater than 25 indicates identity  ``` Score    Expect   Delta  Hit  Protein Peptide   8.6       2.3   -0.04    2   P01024 K.LLPVGR.T   6.9       3.5   -0.04               K.ILPGVR.I   1.7        11   -0.04               K.ILGVPR.S   1.5        12   -0.05               R.IIPRR.F   1.5        12   -0.05               LLPRR ``` | |

|  |  |
| --- | --- |
| |  | | --- | | Top scoring peptide matches to query 714 101: Sum of 3 scans in range 458 (rt=26.1544, f=4, i=28) to 465 (rt=26.4957, f=4, i=30) [\\172.16.3.18\masslynx\2009.PRO\Data\20090824\_45\_qdda.raw] Score greater than 16 indicates homology Score greater than 25 indicates identity  ``` Score    Expect   Delta  Hit  Protein Peptide   3.8         7   -0.05               R.IIPRR.F   3.8         7   -0.03               K.ILPGVR.I   3.8         7   -0.05               LLPRR   3.8         7   -0.03    2   P01024 K.LLPVGR.T ``` | |

|  |  |
| --- | --- |
| |  | | --- | | Top scoring peptide matches to query 715 86: Sum of 2 scans in range 394 (rt=23.6867, f=2, i=86) to 400 (rt=23.9854, f=2, i=87) [\\172.16.3.18\masslynx\2009.PRO\Data\20090828\_12\_qdda.raw] Score greater than 15 indicates homology Score greater than 25 indicates identity  ``` Score    Expect   Delta  Hit  Protein Peptide   8.2       2.5   -0.03    2   P01024 K.LLPVGR.T   8.2       2.6   -0.03               K.ILPGVR.I   2.2        10   -0.04               R.IIPRR.F   2.2        10   -0.04               LLPRR   1.8        11   -0.03               K.ILGVPR.S   1.2        13   -0.04               LLRPR ``` | |

|  |  |
| --- | --- |
| |  | | --- | | Top scoring peptide matches to query 716 94: Sum of 3 scans in range 451 (rt=26.3648, f=7, i=37) to 457 (rt=26.6563, f=7, i=39) [\\172.16.3.18\masslynx\2009.PRO\Data\20090821\_05\_qdda.raw] Score greater than 16 indicates homology Score greater than 25 indicates identity  ``` Score    Expect   Delta  Hit  Protein Peptide  10.6       1.5   -0.03    2   P01024 K.LLPVGR.T   3.0       8.6   -0.04               R.IIPRR.F   3.0       8.6   -0.03               K.ILPGVR.I   3.0       8.6   -0.04               LLPRR ``` | |

|  |  |
| --- | --- |
| |  | | --- | | Top scoring peptide matches to query 718 87: Sum of 2 scans in range 374 (rt=22.7574, f=2, i=66) to 380 (rt=23.056, f=2, i=67) [\\172.16.3.18\masslynx\2009.PRO\Data\20090828\_20\_qdda.raw] Score greater than 14 indicates homology Score greater than 25 indicates identity  ``` Score    Expect   Delta  Hit  Protein Peptide   7.3       3.1   -0.02    2   P01024 K.LLPVGR.T   7.2       3.3   -0.02               K.ILPGVR.I   1.6        12   -0.03               R.IIPRR.F   1.6        12   -0.02               K.ILGVPR.S   1.6        12   -0.03               LLPRR   1.6        12   -0.03               LLRPR ``` | |

|  |  |
| --- | --- |
| |  | | --- | | Top scoring peptide matches to query 719 66: Sum of 31 scans in range 409 (rt=24.8349, f=4, i=46) to 647 (rt=36.405, f=3, i=78) [\\172.16.3.18\masslynx\2009.PRO\Data\20090908\_09\_qdda.raw] Score greater than 21 indicates homology Score greater than 22 indicates identity  ``` Score    Expect   Delta  Hit  Protein Peptide   8.5       1.3    0.10               R.IIPRR.F   8.5       1.3    0.11               K.ILGVPR.S   8.5       1.3    0.11               K.ILPGVR.I   8.5       1.3    0.10               LLPRR   8.5       1.3    0.11    2   P01024 K.LLPVGR.T   8.5       1.3    0.10               LLRPR ``` | |

|  |  |
| --- | --- |
| |  | | --- | | Top scoring peptide matches to query 741 40: Scan 208 (rt=14.6072, f=7, i=14) [\\172.16.3.18\masslynx\2009.PRO\Data\20090824\_33\_qdda.raw] Score greater than 25 indicates homology Score greater than 30 indicates identity  ``` Score    Expect   Delta  Hit  Protein Peptide  13.7       2.2   -0.05   29   P01008 K.LVSANR.L  11.7       3.6   -0.01               R.IQENR.K  11.7       3.6   -0.01               K.LQENR.K  11.7       3.6   -0.01               R.LQQDR.L  10.9       4.2   -0.06               R.IQSRR.I  10.9       4.2   -0.06               R.LAGSRR.D  10.9       4.2   -0.06               R.LQRSR.A  10.9       4.2   -0.06               K.LQSRR.S  10.0       5.2   -0.01               K.IQADGR.D  10.0       5.2   -0.01               R.LAGDQR.N ``` | |

|  |  |
| --- | --- |
| |  | | --- | | Top scoring peptide matches to query 766 1: Sum of 2 scans in range 100 (rt=9.28703, f=2, i=3) to 106 (rt=9.58573, f=2, i=4) [\\172.16.3.18\masslynx\2009.PRO\Data\20090825\_26\_qdda.raw] Score greater than 16 indicates homology Score greater than 25 indicates identity  ``` Score    Expect   Delta  Hit  Protein Peptide   3.5       8.3   -0.13    2   P01024 ENPMR ``` | |

|  |  |
| --- | --- |
| |  | | --- | | Top scoring peptide matches to query 770 8: Sum of 3 scans in range 105 (rt=9.66325, f=4, i=1) to 111 (rt=9.95472, f=4, i=3) [\\172.16.3.18\masslynx\2009.PRO\Data\20090821\_17\_qdda.raw] Score greater than 20 indicates homology Score greater than 29 indicates identity  ``` Score    Expect   Delta  Hit  Protein Peptide   7.1       8.8   -0.02    2   P01024 ENPMR ``` | |

|  |  |
| --- | --- |
| |  | | --- | | Top scoring peptide matches to query 781 53: Sum of 2 scans in range 282 (rt=18.26, f=7, i=31) to 288 (rt=18.5587, f=7, i=32) [\\172.16.3.18\masslynx\2009.PRO\Data\20090825\_30\_qdda.raw] Score greater than 18 indicates homology Score greater than 28 indicates identity  ``` Score    Expect   Delta  Hit  Protein Peptide   5.7       9.9   -0.09   38   P02749 K.LPECR.E ``` | |

|  |  |
| --- | --- |
| |  | | --- | | Top scoring peptide matches to query 782 68: Sum of 2 scans in range 297 (rt=19.1443, f=3, i=47) to 303 (rt=19.4429, f=3, i=48) [\\172.16.3.18\masslynx\2009.PRO\Data\20090828\_28\_qdda.raw] Score greater than 13 indicates homology Score greater than 33 indicates identity  ``` Score    Expect   Delta  Hit  Protein Peptide   0.5        91   -0.02   38   P02749 K.LPECR.E ``` | |

|  |  |
| --- | --- |
| |  | | --- | | Top scoring peptide matches to query 786 73: Scan 334 (rt=20.813, f=4, i=29) [\\172.16.3.18\masslynx\2009.PRO\Data\20090828\_20\_qdda.raw] Score greater than 17 indicates homology Score greater than 33 indicates identity  ``` Score    Expect   Delta  Hit  Protein Peptide   5.8        27    0.02   38   P02749 K.LPECR.E   3.9        41    0.06               K.EDDER.Q   3.9        41    0.01               R.IMDER.N   3.9        41    0.01               R.LMDER.D ``` | |

|  |  |
| --- | --- |
| |  | | --- | | Top scoring peptide matches to query 823 47: Sum of 2 scans in range 293 (rt=18.9404, f=3, i=34) to 299 (rt=19.239, f=3, i=35) [\\172.16.3.18\masslynx\2009.PRO\Data\20090821\_29\_qdda.raw] Score greater than 28 indicates identity  ``` Score    Expect   Delta  Hit  Protein Peptide  26.6     0.072   -0.14               R.VIDAVR.F  26.6     0.072   -0.14   15   P02766 K.VLDAVR.G  14.3       1.2   -0.11               K.VNNGIR.D  14.3       1.2   -0.06               R.DPDVAR.E  13.6       1.5   -0.17               R.VLATLR.G  11.9       2.2   -0.17               K.VIVSVR.V   9.5       3.7   -0.15               K.VIERR.I   9.5       3.7   -0.15               R.VIRER.V   9.5       3.7   -0.15               K.VLERR.A   9.5       3.7   -0.14               R.VLGVER.A ``` | |

|  |  |
| --- | --- |
| |  | | --- | | Top scoring peptide matches to query 824 78: Sum of 2 scans in range 383 (rt=23.3252, f=2, i=60) to 389 (rt=23.6238, f=2, i=61) [\\172.16.3.18\masslynx\2009.PRO\Data\20090821\_21\_qdda.raw] Score greater than 28 indicates identity  ``` Score    Expect   Delta  Hit  Protein Peptide  26.4     0.077   -0.12               R.VIDAVR.F  26.4     0.077   -0.12   15   P02766 K.VLDAVR.G  14.1       1.3   -0.09               K.VNNGIR.D  14.0       1.3   -0.05               R.DPDVAR.E  13.3       1.6   -0.15               R.VLATLR.G  11.8       2.2   -0.15               K.VIVSVR.V   9.4       3.8   -0.13               K.VIERR.I   9.4       3.8   -0.13               R.VIRER.V   9.4       3.8   -0.13               K.VLERR.A   9.4       3.8   -0.12               R.VLGVER.A ``` | |

|  |  |
| --- | --- |
| |  | | --- | | Top scoring peptide matches to query 825 55: Sum of 2 scans in range 292 (rt=18.832, f=2, i=51) to 298 (rt=19.1307, f=2, i=52) [\\172.16.3.18\masslynx\2009.PRO\Data\20090824\_17\_qdda.raw] Score greater than 28 indicates identity  ``` Score    Expect   Delta  Hit  Protein Peptide  26.8      0.07   -0.10               R.VIDAVR.F  26.8      0.07   -0.10   15   P02766 K.VLDAVR.G  14.5       1.2   -0.08               K.VNNGIR.D  14.4       1.2   -0.03               R.DPDVAR.E  13.7       1.4   -0.14               R.VLATLR.G  12.1       2.1   -0.14               K.VIVSVR.V   9.3       3.9   -0.12               K.VIERR.I   9.3       3.9   -0.12               R.VIRER.V   9.3       3.9   -0.12               K.VLERR.A   9.3       3.9   -0.10               R.VLGVER.A ``` | |

|  |  |
| --- | --- |
| |  | | --- | | Top scoring peptide matches to query 826 58: Sum of 2 scans in range 315 (rt=20.023, f=7, i=37) to 321 (rt=20.3217, f=7, i=38) [\\172.16.3.18\masslynx\2009.PRO\Data\20090824\_25\_qdda.raw] Score greater than 28 indicates identity  ``` Score    Expect   Delta  Hit  Protein Peptide  26.7     0.071   -0.10               R.VIDAVR.F  26.7     0.071   -0.10   15   P02766 K.VLDAVR.G  14.4       1.2   -0.08               K.VNNGIR.D  14.4       1.2   -0.03               R.DPDVAR.E  13.7       1.4   -0.14               R.VLATLR.G  11.7       2.2   -0.14               K.VIVSVR.V   9.3       3.9   -0.11               K.VIERR.I   9.3       3.9   -0.11               R.VIRER.V   9.3       3.9   -0.11               K.VLERR.A   9.3       3.9   -0.10               R.VLGVER.A ``` | |

|  |  |
| --- | --- |
| |  | | --- | | Top scoring peptide matches to query 827 110: Sum of 2 scans in range 430 (rt=25.4597, f=5, i=46) to 436 (rt=25.7584, f=5, i=47) [\\172.16.3.18\masslynx\2009.PRO\Data\20090824\_33\_qdda.raw] Score greater than 27 indicates homology Score greater than 28 indicates identity  ``` Score    Expect   Delta  Hit  Protein Peptide  26.0     0.083   -0.09               R.VIDAVR.F  26.0     0.083   -0.09   15   P02766 K.VLDAVR.G  12.9       1.7   -0.07               K.VNNGIR.D  12.0       2.1   -0.02               R.DPDVAR.E  11.6       2.3   -0.13               K.VIVSVR.V   9.4       3.8   -0.13               R.VLATLR.G   6.8       6.9   -0.07               K.AQQVAR.R   6.8       6.9   -0.09               K.DIVGLR.T   6.8       6.9   -0.09               K.DVIGLR.I   6.8       6.9   -0.06               R.EPTLGR.L ``` | |

|  |  |
| --- | --- |
| |  | | --- | | Top scoring peptide matches to query 828 81: Sum of 2 scans in range 395 (rt=23.7368, f=2, i=64) to 401 (rt=24.0355, f=2, i=65) [\\172.16.3.18\masslynx\2009.PRO\Data\20090824\_29\_qdda.raw] Score greater than 27 indicates homology Score greater than 28 indicates identity  ``` Score    Expect   Delta  Hit  Protein Peptide  26.3     0.079   -0.09               R.VIDAVR.F  26.3     0.079   -0.09   15   P02766 K.VLDAVR.G  13.3       1.6   -0.07               K.VNNGIR.D  12.4       1.9   -0.02               R.DPDVAR.E  11.6       2.3   -0.13               K.VIVSVR.V   9.6       3.6   -0.13               R.VLATLR.G   7.3       6.2   -0.07               K.AQQVAR.R   7.3       6.2   -0.09               K.DIVGLR.T   7.3       6.2   -0.09               K.DVIGLR.I   7.3       6.2   -0.06               R.EPTLGR.L ``` | |

|  |  |
| --- | --- |
| |  | | --- | | Top scoring peptide matches to query 829 94: Sum of 2 scans in range 412 (rt=24.7015, f=5, i=39) to 418 (rt=25.0002, f=5, i=40) [\\172.16.3.18\masslynx\2009.PRO\Data\20090821\_17\_qdda.raw] Score greater than 28 indicates identity  ``` Score    Expect   Delta  Hit  Protein Peptide  27.5     0.059   -0.09               R.VIDAVR.F  27.5     0.059   -0.09   15   P02766 K.VLDAVR.G  16.3      0.78   -0.12               R.VLATLR.G  14.3       1.2   -0.12               K.VIVSVR.V  13.7       1.4   -0.02               R.DPDVAR.E  13.7       1.4   -0.06               K.VNNGIR.D  11.7       2.3   -0.10               R.VIRER.V  11.7       2.3   -0.09               R.VLGVER.A  11.7       2.3   -0.10               VLRER  11.3       2.5   -0.10               K.VIERR.I ``` | |

|  |  |
| --- | --- |
| |  | | --- | | Top scoring peptide matches to query 830 93: Sum of 2 scans in range 449 (rt=26.3465, f=5, i=42) to 455 (rt=26.6452, f=5, i=43) [\\172.16.3.18\masslynx\2009.PRO\Data\20090821\_13\_qdda.raw] Score greater than 28 indicates identity  ``` Score    Expect   Delta  Hit  Protein Peptide  26.3     0.078   -0.08               R.VIDAVR.F  26.3     0.078   -0.08   15   P02766 K.VLDAVR.G  14.0       1.3   -0.05               K.VNNGIR.D  14.0       1.3   -0.00               R.DPDVAR.E  13.3       1.6   -0.11               R.VLATLR.G  13.1       1.6   -0.11               K.VIVSVR.V   9.9       3.4   -0.09               R.VIRER.V   9.9       3.4   -0.08               R.VLGVER.A   9.9       3.4   -0.09               VLRER   9.4       3.8   -0.09               K.VIERR.I ``` | |

|  |  |
| --- | --- |
| |  | | --- | | Top scoring peptide matches to query 831 61: Sum of 4 scans in range 325 (rt=20.4397, f=3, i=33) to 342 (rt=21.286, f=3, i=36) [\\172.16.3.18\masslynx\2009.PRO\Data\20090820\_17\_\_\_qdda.raw] Score greater than 28 indicates identity  ``` Score    Expect   Delta  Hit  Protein Peptide  26.0     0.083   -0.07               R.VIDAVR.F  26.0     0.083   -0.07   15   P02766 K.VLDAVR.G  13.8       1.4   -0.05               K.VNNGIR.D  13.7       1.4   -0.00               R.DPDVAR.E  12.9       1.7   -0.11               R.VLATLR.G  10.7       2.9   -0.11               K.VIVSVR.V   7.9       5.4   -0.09               K.VIERR.I   7.9       5.4   -0.09               R.VIRER.V   7.9       5.4   -0.09               K.VLERR.A   7.9       5.4   -0.07               R.VLGVER.A ``` | |

|  |  |
| --- | --- |
| |  | | --- | | Top scoring peptide matches to query 832 117: Sum of 3 scans in range 456 (rt=26.436, f=4, i=44) to 474 (rt=27.3116, f=5, i=37) [\\172.16.3.18\masslynx\2009.PRO\Data\20090824\_37\_qdda.raw] Score greater than 28 indicates identity  ``` Score    Expect   Delta  Hit  Protein Peptide  26.3     0.077   -0.06               R.VIDAVR.F  26.3     0.077   -0.06   15   P02766 K.VLDAVR.G  14.1       1.3   -0.04               K.VNNGIR.D  14.1       1.3    0.01               R.DPDVAR.E  13.4       1.5   -0.10               R.VLATLR.G  11.5       2.4   -0.10               K.VIVSVR.V   7.6       5.8   -0.06               VLVDAR   7.6       5.8   -0.07               K.VIERR.I   7.6       5.8   -0.07               R.VIRER.V   7.6       5.8   -0.07               K.VLERR.A ``` | |

|  |  |
| --- | --- |
| |  | | --- | | Top scoring peptide matches to query 834 114: Sum of 3 scans in range 475 (rt=27.1553, f=4, i=37) to 489 (rt=27.8391, f=4, i=39) [\\172.16.3.18\masslynx\2009.PRO\Data\20090824\_41\_qdda.raw] Score greater than 28 indicates identity  ``` Score    Expect   Delta  Hit  Protein Peptide  28.5     0.047   -0.05               R.VIDAVR.F  28.5     0.047   -0.05   15   P02766 K.VLDAVR.G  13.5       1.5   -0.09               K.VIVSVR.V  11.9       2.2   -0.09               R.VLATLR.G  11.0       2.6   -0.02               K.VNNGIR.D  10.6       2.9    0.02               R.DPDVAR.E   8.5       4.6   -0.06               K.VIERR.I   8.5       4.6   -0.06               R.VIRER.V   8.5       4.6   -0.06               K.VLERR.A   8.5       4.6   -0.05               R.VLGVER.A ``` | |

|  |  |
| --- | --- |
| |  | | --- | | Top scoring peptide matches to query 835 110: Sum of 4 scans in range 466 (rt=27.1164, f=4, i=42) to 489 (rt=28.2482, f=7, i=41) [\\172.16.3.18\masslynx\2009.PRO\Data\20090821\_09\_qdda.raw] Score greater than 28 indicates identity  ``` Score    Expect   Delta  Hit  Protein Peptide  29.1     0.041   -0.04               R.VIDAVR.F  29.1     0.041   -0.04   15   P02766 K.VLDAVR.G  15.7      0.89   -0.07               K.VIVSVR.V  13.7       1.4   -0.01               K.VNNGIR.D  13.6       1.4    0.03               R.DPDVAR.E  13.0       1.7   -0.07               R.VLATLR.G   9.7       3.6   -0.05               K.VIERR.I   9.7       3.6   -0.05               R.VIRER.V   9.7       3.6   -0.05               K.VLERR.A   9.7       3.6   -0.04               R.VLGVER.A ``` | |

|  |  |
| --- | --- |
| |  | | --- | | Top scoring peptide matches to query 836 119: Sum of 2 scans in range 504 (rt=28.3916, f=2, i=98) to 514 (rt=28.8764, f=3, i=50) [\\172.16.3.18\masslynx\2009.PRO\Data\20090824\_45\_qdda.raw] Score greater than 26 indicates homology Score greater than 28 indicates identity  ``` Score    Expect   Delta  Hit  Protein Peptide  25.9     0.086   -0.03               R.VIDAVR.F  25.9     0.086   -0.03   15   P02766 K.VLDAVR.G  11.7       2.2   -0.07               K.VIVSVR.V  11.3       2.5   -0.01               K.VNNGIR.D  10.9       2.7   -0.07               R.VLATLR.G  10.7       2.8    0.00               R.EPTLGR.L   9.5       3.8    0.04               R.DPDVAR.E   7.7       5.7   -0.05               K.VIERR.I   7.7       5.7   -0.05               R.VIRER.V   7.7       5.7   -0.05               K.VLERR.A ``` | |

|  |  |
| --- | --- |
| |  | | --- | | Top scoring peptide matches to query 837 69: Sum of 5 scans in range 298 (rt=19.194, f=4, i=35) to 310 (rt=19.777, f=4, i=39) [\\172.16.3.18\masslynx\2009.PRO\Data\20090828\_28\_qdda.raw] Score greater than 25 indicates homology Score greater than 28 indicates identity  ``` Score    Expect   Delta  Hit  Protein Peptide  12.8       1.8   -0.02               R.VIDAVR.F  12.8       1.8   -0.02   15   P02766 K.VLDAVR.G  11.5       2.3   -0.02               R.VLGVER.A   8.0       5.2   -0.04               R.VIRER.V   8.0       5.2   -0.04               VLRER   7.8       5.5    0.00               K.VNNGIR.D   5.0        10    0.00               K.AQQVAR.R   4.9        11   -0.06               K.VIVSVR.V   4.9        11   -0.06               R.VTILAR.S   4.6        12    0.01               R.ISAPER.E ``` | |

|  |  |
| --- | --- |
| |  | | --- | | Top scoring peptide matches to query 838 103: Sum of 2 scans in range 490 (rt=28.2668, f=2, i=107) to 496 (rt=28.5655, f=2, i=108) [\\172.16.3.18\masslynx\2009.PRO\Data\20090821\_05\_qdda.raw] Score greater than 22 indicates homology Score greater than 28 indicates identity  ``` Score    Expect   Delta  Hit  Protein Peptide  18.0      0.52   -0.02               R.VIDAVR.F  18.0      0.52   -0.02   15   P02766 K.VLDAVR.G   8.9       4.3   -0.06               R.VLATLR.G   8.3       4.9    0.00               K.VNNGIR.D   7.6       5.7    0.05               R.DPDVAR.E   5.9       8.6   -0.03               K.VIERR.I   5.9       8.6   -0.03               R.VIRER.V   5.9       8.6   -0.06               K.VIVSVR.V   5.9       8.6   -0.03               K.VLERR.A   5.9       8.6   -0.02               R.VLGVER.A ``` | |

|  |  |
| --- | --- |
| |  | | --- | | Top scoring peptide matches to query 841 75: Sum of 2 scans in range 491 (rt=28.8658, f=7, i=62) to 492 (rt=28.9084, f=7, i=63) [\\172.16.3.18\masslynx\2009.PRO\Data\20090908\_09\_qdda.raw] Score greater than 15 indicates homology Score greater than 27 indicates identity  ``` Score    Expect   Delta  Hit  Protein Peptide  10.8       2.6    0.13               R.VIDAVR.F  10.8       2.6    0.13   15   P02766 K.VLDAVR.G   2.3        18    0.09               K.VIVSVR.V ``` | |

|  |  |
| --- | --- |
| |  | | --- | | Top scoring peptide matches to query 888 51: Sum of 2 scans in range 280 (rt=18.1605, f=5, i=24) to 286 (rt=18.4592, f=5, i=25) [\\172.16.3.18\masslynx\2009.PRO\Data\20090825\_30\_qdda.raw] Score greater than 23 indicates homology Score greater than 35 indicates identity  ``` Score    Expect   Delta  Hit  Protein Peptide  22.3       1.1   -0.11   28   P0C0L4 K.GSVFLR.N   9.1        23   -0.02               K.GSCPLR.K   7.8        30   -0.02               R.GSETER.L   5.9        48   -0.03               R.GSGSGASR.E   5.7        49   -0.04               R.GSEVMR.E   4.7        63   -0.02               K.GSTEER.H   4.1        73   -0.06               LQCLR   4.1        73   -0.11               K.VGSFLR.I   3.6        81   -0.07               DQFLR   3.6        81   -0.07               K.ENFIR.F ``` | |

|  |  |
| --- | --- |
| |  | | --- | | Top scoring peptide matches to query 895 103: Scan 425 (rt=25.0769, f=6, i=38) [\\172.16.3.18\masslynx\2009.PRO\Data\20090825\_22\_qdda.raw] Score greater than 15 indicates homology Score greater than 35 indicates identity  ``` Score    Expect   Delta  Hit  Protein Peptide   8.1        29   -0.06   28   P0C0L4 K.GSVFLR.N   1.7  1.2e+002   -0.06               K.VGSFLR.I   1.4  1.3e+002    0.03               K.GSCPLR.K ``` | |

|  |  |
| --- | --- |
| |  | | --- | | Top scoring peptide matches to query 897 79: Scan 394 (rt=23.3239, f=3, i=36) [\\172.16.3.18\masslynx\2009.PRO\Data\20090825\_14\_qdda.raw] Score greater than 19 indicates homology Score greater than 35 indicates identity  ``` Score    Expect   Delta  Hit  Protein Peptide   8.0        30   -0.04   34   P02649 R.LVQYR.G   7.9        30   -0.04               R.LQVYR.L   7.6        32   -0.00               K.IFQDR.E   7.6        32   -0.05               K.IFSRR.Y   7.6        32   -0.00               LFDQR   7.6        32   -0.00               LFQDR   7.6        32   -0.05               R.LFRSR.S   7.6        32   -0.05               LFSRR   7.6        32    0.03               K.LMENR.K   7.6        32   -0.02               R.LMRSR.T ``` | |

|  |  |
| --- | --- |
| |  | | --- | | Top scoring peptide matches to query 898 41: Sum of 2 scans in range 235 (rt=16.0114, f=7, i=25) to 241 (rt=16.3101, f=7, i=26) [\\172.16.3.18\masslynx\2009.PRO\Data\20090820\_17\_\_\_qdda.raw] Score greater than 18 indicates homology Score greater than 35 indicates identity  ``` Score    Expect   Delta  Hit  Protein Peptide   7.9        30   -0.03   34   P02649 R.LVQYR.G   7.6        32   -0.03               R.LNLYR.R   5.1        57   -0.03               K.IINYR.D   5.1        57   -0.03               K.LLNYR.T   4.5        66   -0.03               K.NIIYR.F   4.5        66   -0.03               R.NILYR.I   4.5        66   -0.03               K.NLIYR.D   4.5        66   -0.03               NLLYR   3.6        81    0.00               MLVSGR   2.5  1.1e+002   -0.03               K.LGLGYR.A ``` | |

|  |  |
| --- | --- |
| |  | | --- | | Top scoring peptide matches to query 900 81: Sum of 2 scans in range 405 (rt=23.5199, f=4, i=22) to 411 (rt=23.8186, f=4, i=23) [\\172.16.3.18\masslynx\2009.PRO\Data\20090825\_10\_qdda.raw] Score greater than 17 indicates homology Score greater than 35 indicates identity  ``` Score    Expect   Delta  Hit  Protein Peptide   8.6        26   -0.02   34   P02649 R.LVQYR.G   3.9        75    0.05               R.MEAATR.G   3.6        81   -0.02               K.LVSFGR.T   3.5        84   -0.02               K.LGLGYR.A   3.2        89   -0.02               K.IINYR.D   3.2        89   -0.02               K.LLNYR.T   1.8  1.2e+002    0.05               K.DPQYR.R   1.8  1.2e+002   -0.02               VLQYR ``` | |

|  |  |
| --- | --- |
| |  | | --- | | Top scoring peptide matches to query 931 56: Sum of 2 scans in range 290 (rt=18.5435, f=3, i=27) to 296 (rt=18.8421, f=3, i=28) [\\172.16.3.18\masslynx\2009.PRO\Data\20090825\_26\_qdda.raw] Score greater than 26 indicates identity  ``` Score    Expect   Delta  Hit  Protein Peptide  22.6      0.13   -0.06    2   P01024 DELCR  12.3       1.4   -0.06               EDLCR  12.3       1.4   -0.12               MLLCR  11.1       1.9   -0.13               M.PFDFR.R   9.8       2.5   -0.04               R.DEMDR.M   9.8       2.5   -0.11               DEYVR   9.6       2.7   -0.08               K.DDEFR.K   9.5       2.7   -0.10               K.DMLMR.L   9.5       2.7   -0.13               DPFFR   9.2       2.9   -0.08               EDDFR ``` | |

|  |  |
| --- | --- |
| |  | | --- | | Top scoring peptide matches to query 932 86: Scan 411 (rt=24.1571, f=6, i=30) [\\172.16.3.18\masslynx\2009.PRO\Data\20090825\_14\_qdda.raw] Score greater than 19 indicates homology Score greater than 31 indicates identity  ``` Score    Expect   Delta  Hit  Protein Peptide   9.0       8.2   -0.02               EDLCR   6.5        14   -0.02    2   P01024 DELCR   6.5        14   -0.07               MLLCR   3.6        28   -0.03               EDDFR   3.6        28   -0.07               EDVYR ``` | |

|  |  |
| --- | --- |
| |  | | --- | | Top scoring peptide matches to query 933 48: Sum of 2 scans in range 201 (rt=14.3919, f=7, i=15) to 210 (rt=14.8266, f=4, i=19) [\\172.16.3.18\masslynx\2009.PRO\Data\20090828\_24\_qdda.raw] Score greater than 21 indicates homology Score greater than 31 indicates identity  ``` Score    Expect   Delta  Hit  Protein Peptide   9.0       8.1    0.01               M.DFDER.G   9.0       8.1    0.04               DMDER   8.1       9.9    0.01               M.DDFER.R   6.8        14    0.02               R.DCLER.F   6.8        14    0.02               DLCER   6.8        14   -0.03               K.DVYER.L   6.5        15    0.02    2   P01024 DELCR   2.5        36    0.04               R.DEMDR.M   2.5        36   -0.03               DEYVR   2.4        37    0.01               K.DDEFR.K ``` | |

|  |  |
| --- | --- |
| |  | | --- | | Top scoring peptide matches to query 945 25: Sum of 2 scans in range 183 (rt=13.4049, f=5, i=11) to 189 (rt=13.7036, f=5, i=12) [\\172.16.3.18\masslynx\2009.PRO\Data\20090825\_30\_qdda.raw] Score greater than 19 indicates identity  ``` Score    Expect   Delta  Hit  Protein Peptide  25.3     0.012   -0.14    2   P01024 R.FSCQR.R  25.3     0.012   -0.11   54   Q86XS8 -.MSCAGR.A  15.5      0.12   -0.14               FCSQR  15.5      0.12   -0.11               -.MSACGR.K  15.5      0.12   -0.14               K.SFCQR.V  12.8      0.22   -0.19               R.FSYNR.Y   5.2       1.3   -0.14               K.FASCGR.W   5.2       1.3   -0.14               R.FCTNR.R   5.2       1.3   -0.15               R.HPQCR.L   5.2       1.3   -0.11               -.MGSCAR.L ``` | |

|  |  |
| --- | --- |
| |  | | --- | | Top scoring peptide matches to query 946 53: Sum of 2 scans in range 275 (rt=17.8099, f=6, i=24) to 281 (rt=18.1085, f=6, i=25) [\\172.16.3.18\masslynx\2009.PRO\Data\20090825\_26\_qdda.raw] Score greater than 19 indicates identity  ``` Score    Expect   Delta  Hit  Protein Peptide  10.1      0.41   -0.14    2   P01024 R.FSCQR.R   5.3       1.2   -0.11   54   Q86XS8 -.MSCAGR.A   3.8       1.7   -0.14               FCSQR   3.8       1.7   -0.14               K.SFCQR.V   3.4       1.9   -0.19               R.FSYNR.Y   3.4       1.9   -0.11               -.MSACGR.K ``` | |

|  |  |
| --- | --- |
| |  | | --- | | Top scoring peptide matches to query 947 36: Sum of 2 scans in range 223 (rt=15.4954, f=5, i=19) to 229 (rt=15.7941, f=5, i=20) [\\172.16.3.18\masslynx\2009.PRO\Data\20090824\_25\_qdda.raw] Score greater than 19 indicates identity  ``` Score    Expect   Delta  Hit  Protein Peptide  13.7      0.19   -0.14    2   P01024 R.FSCQR.R  13.7      0.19   -0.10   54   Q86XS8 -.MSCAGR.A   8.3      0.67   -0.19               R.FSYNR.Y   8.3      0.67   -0.10               -.MSACGR.K   7.4      0.82   -0.14               FCSQR   7.4      0.82   -0.14               K.SFCQR.V   6.2       1.1   -0.19               K.SFNYR.S   3.1       2.2   -0.18               K.DNGPQR.A   0.3       4.2   -0.10               -.MGSCAR.L ``` | |

|  |  |
| --- | --- |
| |  | | --- | | Top scoring peptide matches to query 948 29: Sum of 2 scans in range 202 (rt=14.4628, f=4, i=16) to 208 (rt=14.7614, f=4, i=17) [\\172.16.3.18\masslynx\2009.PRO\Data\20090821\_29\_qdda.raw] Score greater than 19 indicates identity  ``` Score    Expect   Delta  Hit  Protein Peptide  25.9     0.012   -0.13    2   P01024 R.FSCQR.R  25.9     0.012   -0.10   54   Q86XS8 -.MSCAGR.A  16.1      0.12   -0.13               FCSQR  16.1      0.12   -0.10               -.MSACGR.K  16.1      0.12   -0.13               K.SFCQR.V  13.5      0.21   -0.18               R.FSYNR.Y   5.9       1.2   -0.13               K.FASCGR.W   5.9       1.2   -0.13               R.FCTNR.R   5.9       1.2   -0.15               R.HPQCR.L   5.9       1.2   -0.20               K.MGGHLR.L ``` | |

|  |  |
| --- | --- |
| |  | | --- | | Top scoring peptide matches to query 949 33: Sum of 2 scans in range 210 (rt=14.7324, f=6, i=16) to 216 (rt=15.0311, f=6, i=17) [\\172.16.3.18\masslynx\2009.PRO\Data\20090825\_34\_qdda.raw] Score greater than 19 indicates identity  ``` Score    Expect   Delta  Hit  Protein Peptide  10.3      0.44   -0.13    2   P01024 R.FSCQR.R  10.3      0.44   -0.18               R.FSYNR.Y  10.3      0.44   -0.10               -.MSACGR.K  10.3      0.44   -0.10   54   Q86XS8 -.MSCAGR.A   4.5       1.7   -0.13               K.SFCQR.V   2.7       2.6   -0.13               K.FASCGR.W   2.7       2.6   -0.13               FCSQR   2.7       2.6   -0.13               R.FCTNR.R   2.7       2.6   -0.14               R.HPQCR.L   2.7       2.6   -0.20               K.MGGHLR.L ``` | |

|  |  |
| --- | --- |
| |  | | --- | | Top scoring peptide matches to query 950 34: Sum of 2 scans in range 216 (rt=15.1748, f=4, i=19) to 222 (rt=15.4734, f=4, i=20) [\\172.16.3.18\masslynx\2009.PRO\Data\20090824\_21\_qdda.raw] Score greater than 19 indicates homology Score greater than 21 indicates identity  ``` Score    Expect   Delta  Hit  Protein Peptide   6.2       1.7   -0.20               K.MAHRR.E   6.2       1.7   -0.20               -.MARHR.N   5.9       1.8   -0.12    2   P01024 R.FSCQR.R   5.9       1.8   -0.17               R.FSYNR.Y   5.9       1.8   -0.09               -.MSACGR.K   5.9       1.8   -0.09   54   Q86XS8 -.MSCAGR.A   4.0       2.8   -0.12               K.SFCQR.V   4.0       2.8   -0.17               K.SFNYR.S ``` | |

|  |  |
| --- | --- |
| |  | | --- | | Top scoring peptide matches to query 951 66: Sum of 2 scans in range 317 (rt=19.8221, f=3, i=31) to 323 (rt=20.1207, f=3, i=32) [\\172.16.3.18\masslynx\2009.PRO\Data\20090825\_22\_qdda.raw] Score greater than 22 indicates identity  ``` Score    Expect   Delta  Hit  Protein Peptide  13.3      0.45   -0.11    2   P01024 R.FSCQR.R  13.3      0.45   -0.08   54   Q86XS8 -.MSCAGR.A   8.5       1.4   -0.16               R.FSYNR.Y   8.5       1.4   -0.08               -.MSACGR.K   6.6       2.1   -0.11               K.SFCQR.V   6.6       2.1   -0.11               FCSQR   6.1       2.4   -0.16               K.SFNYR.S   5.3       2.8   -0.19               K.MAHRR.E   2.4       5.5   -0.20               K.TPQGQR.L   2.3       5.7   -0.11               K.CQSFR.D ``` | |

|  |  |
| --- | --- |
| |  | | --- | | Top scoring peptide matches to query 952 48: Sum of 2 scans in range 271 (rt=17.6842, f=4, i=22) to 277 (rt=17.9829, f=4, i=23) [\\172.16.3.18\masslynx\2009.PRO\Data\20090824\_29\_qdda.raw] Score greater than 20 indicates homology Score greater than 23 indicates identity  ``` Score    Expect   Delta  Hit  Protein Peptide  11.8      0.72   -0.10    2   P01024 R.FSCQR.R  11.8      0.72   -0.07   54   Q86XS8 -.MSCAGR.A   7.2       2.1   -0.16               R.FSYNR.Y   7.2       2.1   -0.07               -.MSACGR.K   5.3       3.3   -0.10               FCSQR   5.3       3.3   -0.10               K.SFCQR.V   0.2        10   -0.07               -.MGSCAR.L ``` | |

|  |  |
| --- | --- |
| |  | | --- | | Top scoring peptide matches to query 953 39: Sum of 2 scans in range 159 (rt=12.4167, f=7, i=11) to 164 (rt=12.6656, f=7, i=12) [\\172.16.3.18\masslynx\2009.PRO\Data\20090828\_32\_qdda.raw] Score greater than 17 indicates homology Score greater than 24 indicates identity  ``` Score    Expect   Delta  Hit  Protein Peptide   6.0       3.8   -0.08    2   P01024 R.FSCQR.R   6.0       3.8   -0.05   54   Q86XS8 -.MSCAGR.A   4.0         6   -0.08               FCSQR   4.0       6.1   -0.13               K.DNGPQR.A   3.1       7.5   -0.13               R.FSYNR.Y ``` | |

|  |  |
| --- | --- |
| |  | | --- | | Top scoring peptide matches to query 954 74: Sum of 2 scans in range 378 (rt=22.5405, f=2, i=70) to 384 (rt=22.8392, f=2, i=71) [\\172.16.3.18\masslynx\2009.PRO\Data\20090825\_14\_qdda.raw] Score greater than 24 indicates homology Score greater than 25 indicates identity  ``` Score    Expect   Delta  Hit  Protein Peptide  13.7      0.76   -0.07    2   P01024 R.FSCQR.R  13.7      0.76   -0.04   54   Q86XS8 -.MSCAGR.A  11.0       1.4   -0.12               R.FSYNR.Y  11.0       1.4   -0.04               -.MSACGR.K   6.8       3.8   -0.07               K.SFCQR.V   5.2       5.5   -0.07               FCSQR   4.8       5.9   -0.15               K.MAHRR.E   4.8       5.9   -0.16               MAPPVR   4.8       5.9   -0.15               -.MARHR.N   4.8       5.9   -0.16               -.MAVPPR.G ``` | |

|  |  |
| --- | --- |
| |  | | --- | | Top scoring peptide matches to query 955 58: Sum of 2 scans in range 296 (rt=19.0464, f=5, i=32) to 302 (rt=19.3451, f=5, i=33) [\\172.16.3.18\masslynx\2009.PRO\Data\20090821\_21\_qdda.raw] Score greater than 24 indicates homology Score greater than 26 indicates identity  ``` Score    Expect   Delta  Hit  Protein Peptide  15.2      0.69   -0.07    2   P01024 R.FSCQR.R  15.2      0.69   -0.04   54   Q86XS8 -.MSCAGR.A  10.5       2.1   -0.04               -.MSACGR.K   7.9       3.7   -0.07               FCSQR   7.9       3.7   -0.07               K.SFCQR.V   4.8       7.5   -0.12               R.FSYNR.Y   2.9        12   -0.07               K.FASCGR.W   2.9        12   -0.07               R.FCTNR.R   2.9        12   -0.08               R.HPQCR.L   2.9        12   -0.04               -.MGSCAR.L ``` | |

|  |  |
| --- | --- |
| |  | | --- | | Top scoring peptide matches to query 958 73: Scan 388 (rt=23.2809, f=3, i=49) [\\172.16.3.18\masslynx\2009.PRO\Data\20090821\_05\_qdda.raw] Score greater than 16 indicates homology Score greater than 28 indicates identity  ``` Score    Expect   Delta  Hit  Protein Peptide   8.6       5.1   -0.01    2   P01024 R.FSCQR.R   8.6       5.1    0.03   54   Q86XS8 -.MSCAGR.A   3.3        17    0.03               -.MSACGR.K   2.2        22   -0.01               FCSQR   2.2        22   -0.01               K.SFCQR.V   2.0        23   -0.06               R.FSYNR.Y ``` | |

|  |  |
| --- | --- |
| |  | | --- | | Top scoring peptide matches to query 974 77: Sum of 2 scans in range 343 (rt=21.0898, f=2, i=38) to 349 (rt=21.3885, f=2, i=39) [\\172.16.3.18\masslynx\2009.PRO\Data\20090825\_22\_qdda.raw] Score greater than 20 indicates homology Score greater than 26 indicates identity  ``` Score    Expect   Delta  Hit  Protein Peptide  13.7         1   -0.08   28   P0C0L4 R.IQQFR.K   6.4       5.5   -0.07               K.LTSQSR.E   5.4       6.8   -0.05               R.GIAAGMR.Y   5.3       7.1   -0.08               R.LGQAFR.R   4.5       8.5   -0.08               R.GLAQFR.Q   3.6        10   -0.08               M.QLQFR.S   3.3        11   -0.05               QQLMR   1.1        18   -0.03               R.GHQGHR.M ``` | |

|  |  |
| --- | --- |
| |  | | --- | | Top scoring peptide matches to query 978 96: Scan 369 (rt=22.2936, f=7, i=31) [\\172.16.3.18\masslynx\2009.PRO\Data\20090825\_18\_qdda.raw] Score greater than 24 indicates homology Score greater than 26 indicates identity  ``` Score    Expect   Delta  Hit  Protein Peptide  13.4       1.1   -0.05   28   P0C0L4 R.IQQFR.K  11.3       1.8   -0.05               R.LGQAFR.R   4.3       8.9    0.00               R.AAMGWR.L   4.3       8.9    0.04               K.ADSAGDR.G   4.3       8.9    0.04               K.ASDNER.K   4.3       8.9    0.04               K.DASDQR.E   4.3       8.9    0.04               K.GSEDQR.I   4.3       8.9    0.04               R.GSENER.H   4.3       8.9   -0.03               MAASRR   4.3       8.9    0.00               -.MAAWGR.R ``` | |

|  |  |
| --- | --- |
| |  | | --- | | Top scoring peptide matches to query 979 57: Sum of 2 scans in range 306 (rt=19.3861, f=6, i=26) to 311 (rt=19.635, f=6, i=27) [\\172.16.3.18\masslynx\2009.PRO\Data\20090824\_29\_qdda.raw] Score greater than 18 indicates homology Score greater than 26 indicates identity  ``` Score    Expect   Delta  Hit  Protein Peptide   9.9       2.4   -0.05   28   P0C0L4 R.IQQFR.K   5.4       6.8   -0.02               K.QIAMGR.K   5.3         7   -0.05               M.QLQFR.S   4.8       7.8    0.04               K.ASDNER.K   3.8       9.9    0.01               -.MAAWGR.R   3.4        11    0.00               K.IDSSNR.E   3.1        12   -0.02               QQLMR   3.1        12   -0.02               R.GIAAGMR.Y   2.9        12   -0.05               R.AGLFQR.S   2.9        12   -0.05               R.QLFQR.L ``` | |

|  |  |
| --- | --- |
| |  | | --- | | Top scoring peptide matches to query 982 83: Scan 407 (rt=23.9579, f=2, i=74) [\\172.16.3.18\masslynx\2009.PRO\Data\20090825\_14\_qdda.raw] Score greater than 21 indicates homology Score greater than 26 indicates identity  ``` Score    Expect   Delta  Hit  Protein Peptide   8.6       3.3   -0.04   28   P0C0L4 R.IQQFR.K ``` | |

|  |  |
| --- | --- |
| |  | | --- | | Top scoring peptide matches to query 983 37: Scan 177 (rt=13.2772, f=5, i=17) [\\172.16.3.18\masslynx\2009.PRO\Data\20090828\_28\_qdda.raw] Score greater than 15 indicates homology Score greater than 26 indicates identity  ``` Score    Expect   Delta  Hit  Protein Peptide   4.1       9.2   -0.02   28   P0C0L4 R.IQQFR.K   2.8        12   -0.02               K.QAGFIR.T ``` | |

|  |  |
| --- | --- |
| |  | | --- | | Top scoring peptide matches to query 984 85: Scan 417 (rt=24.1041, f=2, i=84) [\\172.16.3.18\masslynx\2009.PRO\Data\20090825\_10\_qdda.raw] Score greater than 14 indicates homology Score greater than 26 indicates identity  ``` Score    Expect   Delta  Hit  Protein Peptide   9.6       2.6   -0.02   28   P0C0L4 R.IQQFR.K   0.8        19   -0.02               R.LGQAFR.R ``` | |

|  |  |
| --- | --- |
| |  | | --- | | Top scoring peptide matches to query 1000 21: Sum of 2 scans in range 149 (rt=11.6303, f=4, i=6) to 155 (rt=11.929, f=4, i=7) [\\172.16.3.18\masslynx\2009.PRO\Data\20090825\_22\_qdda.raw] Score greater than 22 indicates homology Score greater than 34 indicates identity  ``` Score    Expect   Delta  Hit  Protein Peptide  18.1       2.2   -0.08    1   P01023 TFAQAR   8.3        21   -0.07               R.TTSTAGR.S   6.3        34   -0.03               R.TGDSSAR.L   5.4        42   -0.08               R.TSSRSR.S   5.3        43   -0.05               R.TNTMAR.A   3.6        63   -0.04               MLEER   3.2        70   -0.09               R.QRYAR.W   2.8        77   -0.03               K.CVQAAR.K   1.6    1e+002   -0.05               -.MASASAR.G ``` | |

|  |  |
| --- | --- |
| |  | | --- | | Top scoring peptide matches to query 1001 31: Sum of 2 scans in range 185 (rt=13.4753, f=3, i=14) to 191 (rt=13.774, f=3, i=15) [\\172.16.3.18\masslynx\2009.PRO\Data\20090824\_33\_qdda.raw] Score greater than 24 indicates homology Score greater than 34 indicates identity  ``` Score    Expect   Delta  Hit  Protein Peptide  26.1      0.36   -0.07    1   P01023 TFAQAR  10.2        14   -0.02               R.TGDSSAR.L   6.3        34   -0.04               R.TNTMAR.A   6.2        35   -0.00               R.MGNEAR.F   5.8        38   -0.07               R.TSSRSR.S   4.6        51   -0.05               R.MGRTGR.K   4.6        51   -0.05               R.MTRNR.A   4.1        57   -0.04               K.MQTAAR.T   4.0        58   -0.02               K.CVQAAR.K   0.1  1.4e+002   -0.04               K.TAMNTR.D ``` | |

|  |  |
| --- | --- |
| |  | | --- | | Top scoring peptide matches to query 1002 23: Sum of 2 scans in range 150 (rt=11.8569, f=4, i=7) to 156 (rt=12.1556, f=4, i=8) [\\172.16.3.18\masslynx\2009.PRO\Data\20090821\_17\_qdda.raw] Score greater than 23 indicates homology Score greater than 34 indicates identity  ``` Score    Expect   Delta  Hit  Protein Peptide  16.2       3.5   -0.07    1   P01023 TFAQAR   9.0        18   -0.01               K.CVQAAR.K   5.9        38   -0.04               R.MTRNR.A   5.9        38   -0.01               R.TGDSSAR.L   5.5        41    0.00               R.MGNEAR.F   3.9        59   -0.04               R.MGRTGR.K   3.8        61   -0.03               R.CVNRR.L   3.5        66   -0.03               R.TNTMAR.A   0.0  1.5e+002   -0.06               R.TRSSSR.S   0.0  1.5e+002   -0.05               K.TVGSSSR.F ``` | |

|  |  |
| --- | --- |
| |  | | --- | | Top scoring peptide matches to query 1004 18: Scan 196 (rt=13.9608, f=2, i=51) [\\172.16.3.18\masslynx\2009.PRO\Data\20090821\_05\_qdda.raw] Score greater than 18 indicates homology Score greater than 34 indicates identity  ``` Score    Expect   Delta  Hit  Protein Peptide   5.8        38   -0.02    1   P01023 TFAQAR ``` | |

|  |  |
| --- | --- |
| |  | | --- | | Top scoring peptide matches to query 1005 13: Sum of 3 scans in range 163 (rt=12.1463, f=5, i=5) to 170 (rt=12.4875, f=5, i=7) [\\172.16.3.18\masslynx\2009.PRO\Data\20090825\_06\_qdda.raw] Score greater than 14 indicates homology Score greater than 34 indicates identity  ``` Score    Expect   Delta  Hit  Protein Peptide   2.5        83    0.02               K.MQTAAR.T   1.0  1.2e+002   -0.01    1   P01023 TFAQAR ``` | |

|  |  |
| --- | --- |
| |  | | --- | | Top scoring peptide matches to query 1022 10: Sum of 2 scans in range 128 (rt=10.6078, f=3, i=2) to 134 (rt=10.9065, f=3, i=3) [\\172.16.3.18\masslynx\2009.PRO\Data\20090825\_18\_qdda.raw] Score greater than 25 indicates identity  ``` Score    Expect   Delta  Hit  Protein Peptide  22.6      0.11   -0.14   25   P02763 R.EYQTR.Q  11.1       1.5   -0.14               K.EYTAGR.E   9.9       2.1   -0.14               R.EQYTR.Y   8.1       3.1   -0.05               K.ECENR.V   8.1       3.1   -0.10               ECRSR   7.3       3.7   -0.14               ESSAFR   3.4         9   -0.08               R.DVGCTR.H   3.4       9.1   -0.14               TTMATR   3.4       9.1   -0.14               R.TTSMTR.Q   2.1        12   -0.18               K.EALAHR.W ``` | |

|  |  |
| --- | --- |
| |  | | --- | | Top scoring peptide matches to query 1023 7: Sum of 2 scans in range 113 (rt=9.92098, f=2, i=5) to 119 (rt=10.2197, f=2, i=6) [\\172.16.3.18\masslynx\2009.PRO\Data\20090825\_26\_qdda.raw] Score greater than 25 indicates homology Score greater than 28 indicates identity  ``` Score    Expect   Delta  Hit  Protein Peptide  16.2      0.77   -0.13   25   P02763 R.EYQTR.Q  11.1       2.5   -0.13               R.EQYTR.Y   5.0        10   -0.13               K.EYTAGR.E   1.4        24   -0.13               TTMATR   1.4        24   -0.13               R.TTSMTR.Q   0.7        27   -0.04               K.ECENR.V   0.7        27   -0.09               ECRSR ``` | |

|  |  |
| --- | --- |
| |  | | --- | | Top scoring peptide matches to query 1024 8: Sum of 2 scans in range 123 (rt=10.4487, f=2, i=17) to 129 (rt=10.7473, f=2, i=18) [\\172.16.3.18\masslynx\2009.PRO\Data\20090824\_33\_qdda.raw] Score greater than 24 indicates homology Score greater than 29 indicates identity  ``` Score    Expect   Delta  Hit  Protein Peptide  17.3       0.8   -0.10   25   P02763 R.EYQTR.Q  10.9       3.5   -0.10               K.EYTAGR.E   9.7       4.6   -0.02               K.ECENR.V   9.7       4.6   -0.06               ECRSR   8.4       6.3   -0.07               R.FDDSGR.K   7.5       7.7   -0.10               R.EQYTR.Y   7.4       7.9   -0.07               K.ICMQR.F   7.4       7.9   -0.07               R.ICQMR.N   7.4       7.9   -0.05               K.LCGDSR.L   7.4       7.9   -0.07               K.LCMAGR.D ``` | |

|  |  |
| --- | --- |
| |  | | --- | | Top scoring peptide matches to query 1025 22: Sum of 2 scans in range 162 (rt=12.3207, f=2, i=13) to 168 (rt=12.6194, f=2, i=14) [\\172.16.3.18\masslynx\2009.PRO\Data\20090825\_26\_qdda.raw] Score greater than 22 indicates homology Score greater than 29 indicates identity  ``` Score    Expect   Delta  Hit  Protein Peptide  24.9      0.14   -0.09   13   P04217 K.TTAVCR.G   8.0       6.9   -0.10               R.TGDTFR.W   5.8        11   -0.09               K.TLASCR.D   5.8        11   -0.07               R.SWVCR.K   5.7        12   -0.10               -.MTATTR.G   5.6        12   -0.10               TTMATR   5.6        12   -0.10               R.TTSMTR.Q   5.6        12   -0.10               R.TTTMAR.L   4.4        16   -0.15               TTYRR   4.1        17   -0.06               R.TDRCR.R ``` | |

|  |  |
| --- | --- |
| |  | | --- | | Top scoring peptide matches to query 1026 11: Sum of 2 scans in range 127 (rt=10.643, f=5, i=2) to 133 (rt=10.9417, f=5, i=3) [\\172.16.3.18\masslynx\2009.PRO\Data\20090821\_13\_qdda.raw] Score greater than 18 indicates homology Score greater than 29 indicates identity  ``` Score    Expect   Delta  Hit  Protein Peptide   5.0        14   -0.08   25   P02763 R.EYQTR.Q ``` | |

|  |  |
| --- | --- |
| |  | | --- | | Top scoring peptide matches to query 1027 33: Sum of 2 scans in range 192 (rt=13.9419, f=4, i=17) to 198 (rt=14.2406, f=4, i=18) [\\172.16.3.18\masslynx\2009.PRO\Data\20090821\_21\_qdda.raw] Score greater than 18 indicates homology Score greater than 29 indicates identity  ``` Score    Expect   Delta  Hit  Protein Peptide  15.2       1.3   -0.05   13   P04217 K.TTAVCR.G   4.6        15   -0.05               K.TLASCR.D   3.7        19   -0.12               TTYRR   3.5        19   -0.03               R.TDRCR.R   2.8        23   -0.07               TTMATR   2.8        23   -0.07               R.TTSMTR.Q   2.8        23   -0.07               R.TTTMAR.L   0.9        35   -0.07               R.TGDTFR.W ``` | |

|  |  |
| --- | --- |
| |  | | --- | | Top scoring peptide matches to query 1028 44: Scan 235 (rt=15.8193, f=2, i=23) [\\172.16.3.18\masslynx\2009.PRO\Data\20090825\_22\_qdda.raw] Score greater than 19 indicates homology Score greater than 29 indicates identity  ``` Score    Expect   Delta  Hit  Protein Peptide  16.1       1.1   -0.04   13   P04217 K.TTAVCR.G   5.9        11   -0.14               K.TIAHVR.G   5.9        11   -0.06               TTMATR   5.9        11   -0.06               R.TTSMTR.Q   5.9        11   -0.06               R.TTTMAR.L   5.9        11   -0.11               TTYRR ``` | |

|  |  |
| --- | --- |
| |  | | --- | | Top scoring peptide matches to query 1029 53: Scan 252 (rt=16.7582, f=4, i=21) [\\172.16.3.18\masslynx\2009.PRO\Data\20090824\_33\_qdda.raw] Score greater than 22 indicates homology Score greater than 29 indicates identity  ``` Score    Expect   Delta  Hit  Protein Peptide  17.8      0.73   -0.03   13   P04217 K.TTAVCR.G   8.4       6.4   -0.05               TTMATR   8.4       6.4   -0.05               R.TTSMTR.Q   8.4       6.4   -0.05               R.TTTMAR.L   5.2        13   -0.05               -.MTATTR.G   5.0        14   -0.03               K.TLASCR.D   3.7        19   -0.01               R.TDRCR.R   3.4        20   -0.05               R.TGDTFR.W ``` | |

|  |  |
| --- | --- |
| |  | | --- | | Top scoring peptide matches to query 1030 10: Sum of 3 scans in range 127 (rt=10.5643, f=5, i=6) to 133 (rt=10.8558, f=5, i=8) [\\172.16.3.18\masslynx\2009.PRO\Data\20090824\_41\_qdda.raw] Score greater than 23 indicates homology Score greater than 29 indicates identity  ``` Score    Expect   Delta  Hit  Protein Peptide  12.7       2.4   -0.05   25   P02763 R.EYQTR.Q  10.1       4.3   -0.05               R.EQYTR.Y   7.5       7.8    0.04               K.ECENR.V   7.5       7.8   -0.01               ECRSR   6.7       9.5   -0.01               K.EDNYR.G   4.5        16   -0.05               K.EYTAGR.E   3.5        20   -0.19               K.VPLLVR.G   2.8        23   -0.12               R.VLPDPR.E   2.4        25   -0.13               R.VAHLTR.C   1.4        32   -0.10               K.EALAHR.W ``` | |

|  |  |
| --- | --- |
| |  | | --- | | Top scoring peptide matches to query 1032 61: Sum of 3 scans in range 267 (rt=17.3287, f=5, i=22) to 288 (rt=18.3477, f=5, i=26) [\\172.16.3.18\masslynx\2009.PRO\Data\20090825\_18\_qdda.raw] Score greater than 17 indicates homology Score greater than 29 indicates identity  ``` Score    Expect   Delta  Hit  Protein Peptide  10.3       4.1   -0.03   13   P04217 K.TTAVCR.G   4.5        16   -0.05               -.MTATTR.G   4.2        17   -0.01               R.SWVCR.K ``` | |

|  |  |
| --- | --- |
| |  | | --- | | Top scoring peptide matches to query 1033 13: Sum of 2 scans in range 124 (rt=10.4122, f=6, i=2) to 129 (rt=10.6611, f=6, i=3) [\\172.16.3.18\masslynx\2009.PRO\Data\20090825\_22\_qdda.raw] Score greater than 25 indicates homology Score greater than 29 indicates identity  ``` Score    Expect   Delta  Hit  Protein Peptide  18.3      0.64   -0.04   25   P02763 R.EYQTR.Q  11.7         3   -0.04               K.EYTAGR.E  11.5       3.1   -0.04               R.EQYTR.Y   9.3       5.1   -0.12               R.VLPDPR.E   8.4       6.3    0.04               K.ECENR.V   8.4       6.3   -0.00               ECRSR   3.0        22   -0.19               R.VIPLVR.E   2.8        23   -0.09               K.EALAHR.W   2.8        23    0.04               EDCQR   2.8        23   -0.01               K.EDNYR.G ``` | |

|  |  |
| --- | --- |
| |  | | --- | | Top scoring peptide matches to query 1034 12: Sum of 3 scans in range 124 (rt=10.428, f=7, i=3) to 129 (rt=10.6697, f=7, i=5) [\\172.16.3.18\masslynx\2009.PRO\Data\20090824\_37\_qdda.raw] Score greater than 27 indicates homology Score greater than 29 indicates identity  ``` Score    Expect   Delta  Hit  Protein Peptide  24.9      0.14   -0.04   25   P02763 R.EYQTR.Q  12.7       2.3   -0.04               R.EQYTR.Y  11.4       3.1   -0.04               K.EYTAGR.E   9.6       4.9   -0.12               R.VAHLTR.C   7.8       7.2   -0.11               R.VLPDPR.E   3.2        21   -0.19               R.VIPLVR.E   0.8        36    0.05               K.ECENR.V   0.8        36   -0.00               ECRSR   0.7        37    0.01               R.DVGCTR.H ``` | |

|  |  |
| --- | --- |
| |  | | --- | | Top scoring peptide matches to query 1035 58: Sum of 2 scans in range 285 (rt=18.1026, f=2, i=49) to 297 (rt=18.6868, f=4, i=21) [\\172.16.3.18\masslynx\2009.PRO\Data\20090824\_37\_qdda.raw] Score greater than 15 indicates homology Score greater than 29 indicates identity  ``` Score    Expect   Delta  Hit  Protein Peptide   7.4       7.9   -0.02   13   P04217 K.TTAVCR.G   2.5        25   -0.04               -.MTATTR.G   2.5        25   -0.04               -.MTTATR.Q ``` | |

|  |  |
| --- | --- |
| |  | | --- | | Top scoring peptide matches to query 1036 40: Sum of 4 scans in range 267 (rt=17.4449, f=4, i=18) to 293 (rt=18.7129, f=7, i=25) [\\172.16.3.18\masslynx\2009.PRO\Data\20090821\_13\_qdda.raw] Score greater than 17 indicates homology Score greater than 29 indicates identity  ``` Score    Expect   Delta  Hit  Protein Peptide  10.3       4.1   -0.02   13   P04217 K.TTAVCR.G   3.9        18   -0.03               TTMATR   3.9        18   -0.03               R.TTSMTR.Q   2.8        23   -0.03               R.TTTMAR.L   2.3        26   -0.03               R.TGDTFR.W ``` | |

|  |  |
| --- | --- |
| |  | | --- | | Top scoring peptide matches to query 1038 43: Sum of 5 scans in range 270 (rt=17.3172, f=5, i=12) to 310 (rt=19.2414, f=6, i=14) [\\172.16.3.18\masslynx\2009.PRO\Data\20090825\_14\_qdda.raw] Score greater than 20 indicates homology Score greater than 29 indicates identity  ``` Score    Expect   Delta  Hit  Protein Peptide  18.9      0.57   -0.01   13   P04217 K.TTAVCR.G   6.8       9.1    0.01               R.SWVCR.K   4.2        17   -0.03               R.TGDTFR.W ``` | |

|  |  |
| --- | --- |
| |  | | --- | | Top scoring peptide matches to query 1063 19: Sum of 5 scans in range 164 (rt=12.4723, f=4, i=12) to 177 (rt=13.1123, f=4, i=16) [\\172.16.3.18\masslynx\2009.PRO\Data\20090825\_30\_qdda.raw] Score greater than 26 indicates identity  ``` Score    Expect   Delta  Hit  Protein Peptide  18.2      0.34   -0.17    6   P02671 K.DLLPSR.D  16.8      0.48   -0.17               DLISPR   8.3       3.4   -0.13               K.DLEAPR.K   8.3       3.4   -0.17               R.DLPVTR.T   7.7       3.9   -0.17               R.VELPSR.T   2.9        12   -0.17               M.DPSLLR.E   2.2        14   -0.17               R.DTVPIR.F   2.0        15   -0.17               R.DSIIPR.S   2.0        15   -0.17               K.DSLLPR.S   1.6        16   -0.13               R.DAEIPR.H ``` | |

|  |  |
| --- | --- |
| |  | | --- | | Top scoring peptide matches to query 1065 51: Sum of 2 scans in range 274 (rt=17.9644, f=2, i=46) to 280 (rt=18.2631, f=2, i=47) [\\172.16.3.18\masslynx\2009.PRO\Data\20090821\_21\_qdda.raw] Score greater than 27 indicates identity  ``` Score    Expect   Delta  Hit  Protein Peptide  24.6     0.095   -0.14    6   P02671 K.DLLPSR.D  22.9      0.14   -0.18               R.DILALR.V  22.9      0.14   -0.14               DLISPR  11.9       1.8   -0.11               K.DLEAPR.K  11.9       1.8   -0.14               R.DLPVTR.T  11.1       2.1   -0.14               R.VELPSR.T   9.8       2.9   -0.18               R.LDIALR.N   2.8        15   -0.14               M.DPSLLR.E   2.2        17   -0.14               R.DTVPIR.F   2.0        18   -0.14               R.DSIIPR.S ``` | |

|  |  |
| --- | --- |
| |  | | --- | | Top scoring peptide matches to query 1066 59: Sum of 2 scans in range 278 (rt=18.1162, f=3, i=35) to 284 (rt=18.4149, f=3, i=36) [\\172.16.3.18\masslynx\2009.PRO\Data\20090821\_17\_qdda.raw] Score greater than 27 indicates identity  ``` Score    Expect   Delta  Hit  Protein Peptide  18.4       0.4   -0.14    6   P02671 K.DLLPSR.D  17.2      0.53   -0.14               DLISPR  16.1      0.69   -0.17               R.DILALR.V  12.1       1.7   -0.14               R.VELPSR.T  11.3       2.1   -0.10               K.DLEAPR.K  11.3       2.1   -0.14               R.DLPVTR.T   5.7       7.5   -0.17               R.LDIALR.N   2.6        15   -0.17               K.VIEAIR.V   2.6        15   -0.17               VIEALR   2.6        15   -0.17               R.VLEALR.Q ``` | |

|  |  |
| --- | --- |
| |  | | --- | | Top scoring peptide matches to query 1067 40: Sum of 7 scans in range 228 (rt=15.5246, f=5, i=20) to 245 (rt=16.3575, f=2, i=30) [\\172.16.3.18\masslynx\2009.PRO\Data\20090825\_26\_qdda.raw] Score greater than 27 indicates identity  ``` Score    Expect   Delta  Hit  Protein Peptide  18.2      0.42   -0.13    6   P02671 K.DLLPSR.D  16.7      0.59   -0.17               R.DILALR.V  16.7      0.59   -0.13               DLISPR   8.2       4.2   -0.10               K.DLEAPR.K   8.2       4.2   -0.13               R.DLPVTR.T   6.2       6.7   -0.13               R.VELPSR.T   5.2       8.4   -0.17               R.LDIALR.N   2.8        14   -0.13               M.DPSLLR.E   2.1        17   -0.13               R.DTVPIR.F   1.9        18   -0.13               R.DSIIPR.S ``` | |

|  |  |
| --- | --- |
| |  | | --- | | Top scoring peptide matches to query 1068 54: Sum of 5 scans in range 279 (rt=17.9699, f=5, i=26) to 295 (rt=18.7533, f=2, i=31) [\\172.16.3.18\masslynx\2009.PRO\Data\20090825\_22\_qdda.raw] Score greater than 27 indicates identity  ``` Score    Expect   Delta  Hit  Protein Peptide  17.6      0.48   -0.13    6   P02671 K.DLLPSR.D  16.2      0.67   -0.13               DLISPR  16.1      0.68   -0.16               R.DILALR.V  11.9       1.8   -0.13               R.VELPSR.T  11.4         2   -0.09               K.DLEAPR.K  11.4         2   -0.13               R.DLPVTR.T   4.8       9.3   -0.16               R.LDIALR.N   1.8        18   -0.13               M.DPSLLR.E   1.6        19   -0.13               R.DSIIPR.S   1.6        19   -0.13               K.DSLLPR.S ``` | |

|  |  |
| --- | --- |
| |  | | --- | | Top scoring peptide matches to query 1069 27: Sum of 5 scans in range 215 (rt=15.0884, f=7, i=21) to 232 (rt=15.9274, f=7, i=25) [\\172.16.3.18\masslynx\2009.PRO\Data\20090821\_25\_qdda.raw] Score greater than 27 indicates identity  ``` Score    Expect   Delta  Hit  Protein Peptide  24.6     0.099   -0.12    6   P02671 K.DLLPSR.D  22.9      0.15   -0.16               R.DILALR.V  22.9      0.15   -0.12               DLISPR  11.9       1.9   -0.09               K.DLEAPR.K  11.9       1.9   -0.12               R.DLPVTR.T  11.2       2.2   -0.12               R.VELPSR.T   9.9       2.9   -0.16               R.LDIALR.N   3.6        12   -0.16               K.AIEVLR.R   2.8        15   -0.12               M.DPSLLR.E   2.2        17   -0.12               R.DTVPIR.F ``` | |

|  |  |
| --- | --- |
| |  | | --- | | Top scoring peptide matches to query 1070 73: Sum of 2 scans in range 310 (rt=19.4165, f=2, i=48) to 316 (rt=19.7152, f=2, i=49) [\\172.16.3.18\masslynx\2009.PRO\Data\20090825\_18\_qdda.raw] Score greater than 27 indicates identity  ``` Score    Expect   Delta  Hit  Protein Peptide  26.1     0.071   -0.12    6   P02671 K.DLLPSR.D  24.1      0.11   -0.15               R.DILALR.V  24.1      0.11   -0.12               DLISPR  12.6       1.6   -0.08               K.DLEAPR.K  12.6       1.6   -0.12               R.DLPVTR.T  11.8       1.9   -0.12               R.VELPSR.T  11.2       2.2   -0.12               M.DPSLLR.E  10.3       2.7   -0.15               R.LDIALR.N   9.3       3.4   -0.08               R.DAEIPR.H   9.3       3.4   -0.04               R.DAMAHR.I ``` | |

|  |  |
| --- | --- |
| |  | | --- | | Top scoring peptide matches to query 1071 62: Sum of 2 scans in range 348 (rt=21.0806, f=2, i=66) to 354 (rt=21.3793, f=2, i=67) [\\172.16.3.18\masslynx\2009.PRO\Data\20090825\_14\_qdda.raw] Score greater than 27 indicates identity  ``` Score    Expect   Delta  Hit  Protein Peptide  24.4       0.1   -0.11    6   P02671 K.DLLPSR.D  22.6      0.16   -0.15               R.DILALR.V  22.6      0.16   -0.11               DLISPR  11.7       1.9   -0.08               K.DLEAPR.K  11.7       1.9   -0.11               R.DLPVTR.T  11.1       2.2   -0.11               M.DPSLLR.E  10.7       2.4   -0.11               R.VELPSR.T   9.3       3.4   -0.15               R.LDIALR.N   9.1       3.5   -0.08               R.DAEIPR.H   9.1       3.5   -0.03               R.DAMAHR.I ``` | |

|  |  |
| --- | --- |
| |  | | --- | | Top scoring peptide matches to query 1072 29: Sum of 4 scans in range 193 (rt=14.0429, f=4, i=15) to 209 (rt=14.8394, f=4, i=18) [\\172.16.3.18\masslynx\2009.PRO\Data\20090824\_21\_qdda.raw] Score greater than 27 indicates identity  ``` Score    Expect   Delta  Hit  Protein Peptide  24.6       0.1   -0.11    6   P02671 K.DLLPSR.D  22.8      0.15   -0.15               R.DILALR.V  22.8      0.15   -0.11               DLISPR  11.8       1.9   -0.08               K.DLEAPR.K  11.8       1.9   -0.11               R.DLPVTR.T  10.9       2.3   -0.11               R.VELPSR.T   9.5       3.2   -0.15               R.LDIALR.N   2.9        15   -0.11               M.DPSLLR.E   2.2        17   -0.11               R.DTVPIR.F   2.0        18   -0.11               R.DSIIPR.S ``` | |

|  |  |
| --- | --- |
| |  | | --- | | Top scoring peptide matches to query 1073 40: Sum of 4 scans in range 189 (rt=13.8614, f=3, i=31) to 211 (rt=14.9434, f=4, i=20) [\\172.16.3.18\masslynx\2009.PRO\Data\20090828\_28\_qdda.raw] Score greater than 27 indicates identity  ``` Score    Expect   Delta  Hit  Protein Peptide  22.1      0.18   -0.11    6   P02671 K.DLLPSR.D  21.4      0.21   -0.11               R.DLPVTR.T  19.9      0.29   -0.15               R.DILALR.V  19.9      0.29   -0.11               DLISPR  10.9       2.4   -0.07               K.DLEAPR.K  10.8       2.4   -0.05               K.DTAHTR.A   9.3       3.4   -0.11               R.DSIIPR.S   9.3       3.4   -0.11               K.DSLLPR.S   8.8       3.8   -0.11               R.VELPSR.T   8.6         4   -0.07               R.DAEIPR.H ``` | |

|  |  |
| --- | --- |
| |  | | --- | | Top scoring peptide matches to query 1074 71: Sum of 2 scans in range 337 (rt=20.6311, f=2, i=56) to 343 (rt=20.9298, f=2, i=57) [\\172.16.3.18\masslynx\2009.PRO\Data\20090824\_37\_qdda.raw] Score greater than 27 indicates identity  ``` Score    Expect   Delta  Hit  Protein Peptide  18.1      0.44   -0.10    6   P02671 K.DLLPSR.D  16.7      0.62   -0.14               R.DILALR.V  16.7      0.62   -0.10               DLISPR   8.2       4.4   -0.07               K.DLEAPR.K   8.2       4.4   -0.10               R.DLPVTR.T   6.3       6.8   -0.10               R.VELPSR.T   5.3       8.4   -0.14               R.LDIALR.N   2.7        16   -0.10               M.DPSLLR.E   2.0        18   -0.10               R.DTVPIR.F   1.8        19   -0.10               R.DSIIPR.S ``` | |

|  |  |
| --- | --- |
| |  | | --- | | Top scoring peptide matches to query 1075 32: Sum of 5 scans in range 202 (rt=14.463, f=7, i=15) to 217 (rt=15.2025, f=7, i=19) [\\172.16.3.18\masslynx\2009.PRO\Data\20090824\_25\_qdda.raw] Score greater than 27 indicates identity  ``` Score    Expect   Delta  Hit  Protein Peptide  24.8     0.095   -0.10    6   P02671 K.DLLPSR.D  23.0      0.14   -0.14               R.DILALR.V  23.0      0.14   -0.10               DLISPR  12.1       1.8   -0.07               K.DLEAPR.K  12.1       1.8   -0.10               R.DLPVTR.T  11.2       2.2   -0.10               R.VELPSR.T   9.8         3   -0.14               R.LDIALR.N   3.0        14   -0.10               M.DPSLLR.E   2.4        17   -0.10               R.DTVPIR.F   2.1        18   -0.10               R.DSIIPR.S ``` | |

|  |  |
| --- | --- |
| |  | | --- | | Top scoring peptide matches to query 1076 63: Sum of 2 scans in range 284 (rt=18.3107, f=3, i=34) to 290 (rt=18.6094, f=3, i=35) [\\172.16.3.18\masslynx\2009.PRO\Data\20090824\_33\_qdda.raw] Score greater than 27 indicates identity  ``` Score    Expect   Delta  Hit  Protein Peptide  24.8     0.096   -0.10    6   P02671 K.DLLPSR.D  23.0      0.14   -0.14               R.DILALR.V  23.0      0.14   -0.10               DLISPR  12.0       1.8   -0.06               K.DLEAPR.K  12.0       1.8   -0.10               R.DLPVTR.T  11.2       2.2   -0.10               R.VELPSR.T   9.8         3   -0.14               R.LDIALR.N   3.0        15   -0.10               M.DPSLLR.E   2.4        17   -0.10               R.DTVPIR.F   2.1        18   -0.10               R.DSIIPR.S ``` | |

|  |  |
| --- | --- |
| |  | | --- | | Top scoring peptide matches to query 1077 28: Sum of 4 scans in range 143 (rt=11.5572, f=2, i=22) to 162 (rt=12.4899, f=2, i=25) [\\172.16.3.18\masslynx\2009.PRO\Data\20090828\_24\_qdda.raw] Score greater than 27 indicates identity  ``` Score    Expect   Delta  Hit  Protein Peptide  19.5      0.32   -0.09    6   P02671 K.DLLPSR.D  17.4      0.52   -0.13               R.DILALR.V  17.4      0.52   -0.09               DLISPR  17.3      0.53   -0.09               R.DLPVTR.T  10.8       2.4   -0.05               K.DLEAPR.K   8.0       4.6   -0.03               K.DTAHTR.A   7.4       5.2   -0.09               R.DSIIPR.S   7.4       5.2   -0.09               K.DSLLPR.S   7.2       5.5   -0.09               R.VELPSR.T   6.6       6.2   -0.05               R.DAEIPR.H ``` | |

|  |  |
| --- | --- |
| |  | | --- | | Top scoring peptide matches to query 1078 32: Sum of 7 scans in range 197 (rt=14.0659, f=3, i=13) to 244 (rt=16.3662, f=5, i=19) [\\172.16.3.18\masslynx\2009.PRO\Data\20090824\_29\_qdda.raw] Score greater than 27 indicates identity  ``` Score    Expect   Delta  Hit  Protein Peptide  24.2      0.11   -0.13               R.DILALR.V  24.2      0.11   -0.09               DLISPR  24.2      0.11   -0.09    6   P02671 K.DLLPSR.D  15.8      0.75   -0.09               R.VELPSR.T  12.7       1.6   -0.05               K.DLEAPR.K  12.7       1.6   -0.09               R.DLPVTR.T  10.7       2.5   -0.13               R.LDIALR.N   6.0       7.2   -0.09               R.DSIIPR.S   6.0       7.2   -0.09               K.DSLLPR.S   5.5       8.1   -0.13               K.AIEVLR.R ``` | |

|  |  |
| --- | --- |
| |  | | --- | | Top scoring peptide matches to query 1079 69: Sum of 2 scans in range 353 (rt=21.2003, f=3, i=28) to 359 (rt=21.499, f=3, i=29) [\\172.16.3.18\masslynx\2009.PRO\Data\20090824\_41\_qdda.raw] Score greater than 27 indicates identity  ``` Score    Expect   Delta  Hit  Protein Peptide  17.6       0.5   -0.07    6   P02671 K.DLLPSR.D  16.0      0.72   -0.11               R.DILALR.V  16.0      0.72   -0.07               DLISPR   7.5       5.2   -0.03               K.DLEAPR.K   7.5       5.2   -0.07               R.DLPVTR.T   7.3       5.4   -0.07               R.VELPSR.T   5.7       7.8   -0.11               R.LDIALR.N   2.2        17   -0.07               M.DPSLLR.E   1.4        21   -0.07               R.DTVPIR.F   0.7        24   -0.03               R.DAEIPR.H ``` | |

|  |  |
| --- | --- |
| |  | | --- | | Top scoring peptide matches to query 1080 57: Sum of 2 scans in range 354 (rt=21.041, f=2, i=73) to 360 (rt=21.3397, f=2, i=74) [\\172.16.3.18\masslynx\2009.PRO\Data\20090825\_10\_qdda.raw] Score greater than 27 indicates identity  ``` Score    Expect   Delta  Hit  Protein Peptide  17.4      0.52   -0.06    6   P02671 K.DLLPSR.D  15.9      0.74   -0.10               R.DILALR.V  15.9      0.74   -0.06               DLISPR   7.5       5.1   -0.06               R.VELPSR.T   7.4       5.2   -0.03               K.DLEAPR.K   7.4       5.2   -0.06               R.DLPVTR.T   5.6       7.9   -0.10               R.LDIALR.N   2.0        18   -0.06               M.DPSLLR.E   1.3        21   -0.06               R.DTVPIR.F   1.1        23   -0.06               R.DSIIPR.S ``` | |

|  |  |
| --- | --- |
| |  | | --- | | Top scoring peptide matches to query 1081 56: Sum of 2 scans in range 333 (rt=20.6577, f=2, i=65) to 339 (rt=20.9564, f=2, i=66) [\\172.16.3.18\masslynx\2009.PRO\Data\20090821\_13\_qdda.raw] Score greater than 25 indicates homology Score greater than 27 indicates identity  ``` Score    Expect   Delta  Hit  Protein Peptide  12.6       1.6   -0.06    6   P02671 K.DLLPSR.D  11.6         2   -0.06               DLISPR  10.7       2.4   -0.09               R.DILALR.V   8.7       3.9   -0.06               R.VELPSR.T   5.2       8.8   -0.02               K.DLEAPR.K   5.2       8.8   -0.06               R.DLPVTR.T   2.3        17   -0.09               R.LDIALR.N   0.3        27   -0.06               M.DPSLLR.E ``` | |

|  |  |
| --- | --- |
| |  | | --- | | Top scoring peptide matches to query 1082 59: Sum of 2 scans in range 363 (rt=21.5516, f=2, i=76) to 369 (rt=21.8503, f=2, i=77) [\\172.16.3.18\masslynx\2009.PRO\Data\20090824\_45\_qdda.raw] Score greater than 27 indicates identity  ``` Score    Expect   Delta  Hit  Protein Peptide  24.9     0.092   -0.09               R.DILALR.V  22.0      0.18   -0.05               DLISPR  22.0      0.18   -0.05    6   P02671 K.DLLPSR.D  11.2       2.2   -0.09               R.LDIALR.N  11.0       2.3   -0.02               K.DLEAPR.K  11.0       2.3   -0.05               R.DLPVTR.T   9.0       3.6   -0.05               R.VELPSR.T   7.9       4.7   -0.06               R.AQAALAR.D   7.9       4.7   -0.07               R.ARGGLAR.W   7.9       4.7   -0.09               R.IVEIAR.L ``` | |

|  |  |
| --- | --- |
| |  | | --- | | Top scoring peptide matches to query 1083 70: Sum of 7 scans in range 338 (rt=20.8709, f=3, i=33) to 360 (rt=21.9457, f=2, i=82) [\\172.16.3.18\masslynx\2009.PRO\Data\20090821\_09\_qdda.raw] Score greater than 27 indicates identity  ``` Score    Expect   Delta  Hit  Protein Peptide  18.0      0.46   -0.04    6   P02671 K.DLLPSR.D  16.7      0.61   -0.04               DLISPR  15.6       0.8   -0.07               R.DILALR.V  12.2       1.7   -0.04               R.VELPSR.T   8.0       4.6    0.00               K.DLEAPR.K   8.0       4.6   -0.04               R.DLPVTR.T   5.3       8.4   -0.07               R.LDIALR.N   1.8        19   -0.07               K.VIEAIR.V   1.8        19   -0.07               VIEALR   1.8        19   -0.07               R.VLEALR.Q ``` | |

|  |  |
| --- | --- |
| |  | | --- | | Top scoring peptide matches to query 1084 57: Sum of 5 scans in range 346 (rt=21.2292, f=2, i=85) to 370 (rt=22.4036, f=6, i=26) [\\172.16.3.18\masslynx\2009.PRO\Data\20090821\_05\_qdda.raw] Score greater than 26 indicates homology Score greater than 27 indicates identity  ``` Score    Expect   Delta  Hit  Protein Peptide  13.8       1.2   -0.03    6   P02671 K.DLLPSR.D  12.7       1.5   -0.03               DLISPR  11.7       1.9   -0.07               R.DILALR.V   8.9       3.7   -0.03               R.VELPSR.T   5.3       8.5    0.00               K.DLEAPR.K   5.3       8.5   -0.03               R.DLPVTR.T   4.6        10   -0.06               R.ARGGLAR.W   3.4        13   -0.03               K.DTVLPR.R   3.4        13    0.00               K.DVDPVR.T   3.3        13   -0.03               R.DTVPIR.F ``` | |

|  |  |
| --- | --- |
| |  | | --- | | Top scoring peptide matches to query 1085 32: Sum of 8 scans in range 180 (rt=13.3138, f=3, i=13) to 235 (rt=15.9568, f=4, i=18) [\\172.16.3.18\masslynx\2009.PRO\Data\20090828\_12\_qdda.raw] Score greater than 23 indicates homology Score greater than 27 indicates identity  ``` Score    Expect   Delta  Hit  Protein Peptide  13.0       1.5   -0.02    6   P02671 K.DLLPSR.D  12.9       1.5   -0.02               DLISPR  10.0       2.9   -0.06               R.DILALR.V   8.1       4.5   -0.02               R.DLPVTR.T   6.7       6.2    0.02               K.DLEAPR.K   6.4       6.6    0.00   29   P01008 R.SLNPNR.V   6.2       6.9    0.04               K.DTAHTR.A   3.5        13    0.00               SSHLTR   1.9        19   -0.02               M.DPSLLR.E   0.7        25   -0.02               R.DSIIPR.S ``` | |

|  |  |
| --- | --- |
| |  | | --- | | Top scoring peptide matches to query 1086 71: Sum of 7 scans in range 300 (rt=18.9767, f=6, i=16) to 334 (rt=20.6293, f=5, i=22) [\\172.16.3.18\masslynx\2009.PRO\Data\20090828\_04\_qdda.raw] Score greater than 27 indicates identity  ``` Score    Expect   Delta  Hit  Protein Peptide  28.3     0.043   -0.02               DLISPR  19.6      0.32   -0.02    6   P02671 K.DLLPSR.D  17.5      0.51   -0.06               R.DILALR.V  17.4      0.52    0.02               K.DLEAPR.K  13.1       1.4   -0.02               R.DLPVTR.T   8.3       4.3   -0.02               R.DSIIPR.S   8.3       4.3   -0.02               K.DSLLPR.S   7.1       5.6   -0.02               R.VELPSR.T   6.6       6.3    0.02               R.DAEIPR.H   6.6       6.3   -0.02               K.DTVLPR.R ``` | |

|  |  |
| --- | --- |
| |  | | --- | | Top scoring peptide matches to query 1087 41: Sum of 17 scans in range 200 (rt=14.2576, f=5, i=14) to 264 (rt=17.3646, f=7, i=21) [\\172.16.3.18\masslynx\2009.PRO\Data\20090828\_16\_qdda.raw] Score greater than 27 indicates identity  ``` Score    Expect   Delta  Hit  Protein Peptide  18.8      0.38   -0.02    6   P02671 K.DLLPSR.D  16.9      0.59   -0.05               R.DILALR.V  16.9      0.59   -0.02               DLISPR  16.8       0.6   -0.02               R.DLPVTR.T   9.6       3.2    0.02               K.DLEAPR.K   6.9       5.9    0.05               K.DTAHTR.A   6.8       6.1   -0.02               R.VELPSR.T   6.3       6.7   -0.02               R.DSIIPR.S   6.3       6.7   -0.02               K.DSLLPR.S   5.7       7.8    0.02               R.DAEIPR.H ``` | |

|  |  |
| --- | --- |
| |  | | --- | | Top scoring peptide matches to query 1088 31: Sum of 13 scans in range 198 (rt=14.0773, f=5, i=11) to 267 (rt=17.4125, f=5, i=18) [\\172.16.3.18\masslynx\2009.PRO\Data\20090828\_08\_qdda.raw] Score greater than 27 indicates identity  ``` Score    Expect   Delta  Hit  Protein Peptide  21.1      0.22   -0.01               R.DLPVTR.T  17.9      0.47   -0.01    6   P02671 K.DLLPSR.D  15.9      0.73   -0.04               R.DILALR.V  15.9      0.73   -0.01               DLISPR   8.6         4    0.03               K.DLEAPR.K   6.9       5.8    0.05               K.DTAHTR.A   6.1       7.1   -0.01               R.VELPSR.T   5.0         9    0.03               R.DPLEAR.E   4.0        11   -0.04               R.LDIALR.N   3.0        14   -0.01               K.EVPLSR.G ``` | |

|  |  |
| --- | --- |
| |  | | --- | | Top scoring peptide matches to query 1089 32: Sum of 15 scans in range 164 (rt=12.5482, f=6, i=10) to 218 (rt=15.1705, f=6, i=17) [\\172.16.3.18\masslynx\2009.PRO\Data\20090828\_20\_qdda.raw] Score greater than 27 indicates identity  ``` Score    Expect   Delta  Hit  Protein Peptide  19.8       0.3   -0.01    6   P02671 K.DLLPSR.D  17.9      0.47   -0.04               R.DILALR.V  17.9      0.47   -0.01               DLISPR  16.5      0.64   -0.01               R.DLPVTR.T   9.3       3.4    0.03               K.DLEAPR.K   7.5       5.1    0.05               K.DTAHTR.A   7.3       5.3   -0.01               R.VELPSR.T   7.3       5.3   -0.01               R.DSIIPR.S   7.3       5.3   -0.01               K.DSLLPR.S   6.7       6.2    0.03               R.DAEIPR.H ``` | |

|  |  |
| --- | --- |
| |  | | --- | | Top scoring peptide matches to query 1198 36: Sum of 2 scans in range 217 (rt=15.1507, f=5, i=23) to 223 (rt=15.4494, f=5, i=24) [\\172.16.3.18\masslynx\2009.PRO\Data\20090824\_17\_qdda.raw] Score greater than 17 indicates identity  ``` Score    Expect   Delta  Hit  Protein Peptide  12.5      0.16   -0.11    6   P02671 K.CPSGCR.M   6.9      0.57   -0.15               K.CQLCR.S ``` | |

|  |  |
| --- | --- |
| |  | | --- | | Top scoring peptide matches to query 1199 64: Sum of 2 scans in range 300 (rt=19.1985, f=2, i=49) to 306 (rt=19.4972, f=2, i=50) [\\172.16.3.18\masslynx\2009.PRO\Data\20090821\_17\_qdda.raw] Score greater than 17 indicates identity  ``` Score    Expect   Delta  Hit  Protein Peptide  10.4      0.25   -0.11    6   P02671 K.CPSGCR.M   4.5      0.99   -0.14               R.CLCQR.G   4.5      0.99   -0.14               R.CMMQR.E ``` | |

|  |  |
| --- | --- |
| |  | | --- | | Top scoring peptide matches to query 1200 30: Sum of 2 scans in range 141 (rt=11.5338, f=2, i=20) to 147 (rt=11.8325, f=2, i=21) [\\172.16.3.18\masslynx\2009.PRO\Data\20090828\_32\_qdda.raw] Score greater than 18 indicates identity  ``` Score    Expect   Delta  Hit  Protein Peptide   2.9         2   -0.10    6   P02671 K.CPSGCR.M ``` | |

|  |  |
| --- | --- |
| |  | | --- | | Top scoring peptide matches to query 1201 44: Sum of 4 scans in range 253 (rt=16.8944, f=4, i=26) to 268 (rt=17.6411, f=4, i=29) [\\172.16.3.18\masslynx\2009.PRO\Data\20090820\_17\_\_\_qdda.raw] Score greater than 16 indicates homology Score greater than 20 indicates identity  ``` Score    Expect   Delta  Hit  Protein Peptide   5.4       1.5   -0.18               K.CFSRR.S   3.2       2.4   -0.08    6   P02671 K.CPSGCR.M   1.8       3.3   -0.12               R.CGACIR.R ``` | |

|  |  |
| --- | --- |
| |  | | --- | | Top scoring peptide matches to query 1202 77: Sum of 2 scans in range 353 (rt=21.4073, f=2, i=58) to 359 (rt=21.706, f=2, i=59) [\\172.16.3.18\masslynx\2009.PRO\Data\20090824\_37\_qdda.raw] Score greater than 18 indicates homology Score greater than 20 indicates identity  ``` Score    Expect   Delta  Hit  Protein Peptide   7.1         1   -0.12               R.CLCQR.G   7.1         1   -0.12               R.CMMQR.E   5.3       1.5   -0.08    6   P02671 K.CPSGCR.M ``` | |

|  |  |
| --- | --- |
| |  | | --- | | Top scoring peptide matches to query 1203 68: Sum of 2 scans in range 363 (rt=21.807, f=2, i=68) to 369 (rt=22.1057, f=2, i=69) [\\172.16.3.18\masslynx\2009.PRO\Data\20090825\_14\_qdda.raw] Score greater than 16 indicates homology Score greater than 20 indicates identity  ``` Score    Expect   Delta  Hit  Protein Peptide   4.7       1.7   -0.08    6   P02671 K.CPSGCR.M   3.4       2.4   -0.11               R.CLCQR.G   3.4       2.4   -0.11               R.CMMQR.E   1.7       3.5   -0.11               K.CQLCR.S ``` | |

|  |  |
| --- | --- |
| |  | | --- | | Top scoring peptide matches to query 1205 83: Sum of 2 scans in range 339 (rt=20.8266, f=2, i=52) to 345 (rt=21.1253, f=2, i=53) [\\172.16.3.18\masslynx\2009.PRO\Data\20090825\_18\_qdda.raw] Score greater than 20 indicates identity  ``` Score    Expect   Delta  Hit  Protein Peptide   8.6      0.73   -0.07    6   P02671 K.CPSGCR.M ``` | |

|  |  |
| --- | --- |
| |  | | --- | | Top scoring peptide matches to query 1206 43: Sum of 2 scans in range 256 (rt=16.9505, f=3, i=21) to 262 (rt=17.2492, f=3, i=22) [\\172.16.3.18\masslynx\2009.PRO\Data\20090824\_29\_qdda.raw] Score greater than 17 indicates homology Score greater than 20 indicates identity  ``` Score    Expect   Delta  Hit  Protein Peptide  12.2      0.33   -0.07    6   P02671 K.CPSGCR.M   4.4         2   -0.10               R.CALCGR.S   3.0       2.7   -0.10               K.CQLCR.S ``` | |

|  |  |
| --- | --- |
| |  | | --- | | Top scoring peptide matches to query 1207 80: Sum of 2 scans in range 379 (rt=22.4684, f=3, i=31) to 385 (rt=22.7671, f=3, i=32) [\\172.16.3.18\masslynx\2009.PRO\Data\20090824\_41\_qdda.raw] Score greater than 17 indicates homology Score greater than 20 indicates identity  ``` Score    Expect   Delta  Hit  Protein Peptide   6.4       1.4   -0.06    6   P02671 K.CPSGCR.M   4.7       2.1   -0.10               R.CMMQR.E   3.3       2.9   -0.10               R.CLCQR.G ``` | |

|  |  |
| --- | --- |
| |  | | --- | | Top scoring peptide matches to query 1208 39: Sum of 2 scans in range 188 (rt=13.8116, f=2, i=23) to 194 (rt=14.1103, f=2, i=24) [\\172.16.3.18\masslynx\2009.PRO\Data\20090828\_28\_qdda.raw] Score greater than 17 indicates homology Score greater than 20 indicates identity  ``` Score    Expect   Delta  Hit  Protein Peptide   5.8       1.6   -0.10               R.CALCGR.S   4.7       2.1   -0.06    6   P02671 K.CPSGCR.M ``` | |

|  |  |
| --- | --- |
| |  | | --- | | Top scoring peptide matches to query 1210 35: Sum of 4 scans in range 158 (rt=12.2908, f=4, i=12) to 177 (rt=13.2236, f=2, i=27) [\\172.16.3.18\masslynx\2009.PRO\Data\20090828\_24\_qdda.raw] Score greater than 15 indicates homology Score greater than 25 indicates identity  ``` Score    Expect   Delta  Hit  Protein Peptide   2.3        11   -0.08               R.CALCGR.S   2.0        11   -0.04    6   P02671 K.CPSGCR.M ``` | |

|  |  |
| --- | --- |
| |  | | --- | | Top scoring peptide matches to query 1212 69: Sum of 2 scans in range 375 (rt=22.6467, f=4, i=27) to 381 (rt=22.9454, f=4, i=28) [\\172.16.3.18\masslynx\2009.PRO\Data\20090821\_05\_qdda.raw] Score greater than 16 indicates homology Score greater than 26 indicates identity  ``` Score    Expect   Delta  Hit  Protein Peptide   3.2       9.5   -0.02    6   P02671 K.CPSGCR.M ``` | |

|  |  |
| --- | --- |
| |  | | --- | | Top scoring peptide matches to query 1216 44: Sum of 3 scans in range 224 (rt=15.456, f=2, i=43) to 245 (rt=16.4748, f=2, i=45) [\\172.16.3.18\masslynx\2009.PRO\Data\20090828\_20\_qdda.raw] Score greater than 14 indicates homology Score greater than 27 indicates identity  ``` Score    Expect   Delta  Hit  Protein Peptide   2.0        16    0.01    6   P02671 K.CPSGCR.M ``` | |

|  |  |
| --- | --- |
| |  | | --- | | Top scoring peptide matches to query 1223 33: Sum of 2 scans in range 214 (rt=15.0752, f=2, i=37) to 220 (rt=15.3739, f=2, i=38) [\\172.16.3.18\masslynx\2009.PRO\Data\20090824\_21\_qdda.raw] Score greater than 30 indicates identity  ``` Score    Expect   Delta  Hit  Protein Peptide  26.5      0.11   -0.19    9   P02675 K.ISQLTR.M  20.1       0.5   -0.19               R.LSGATIR.I  19.3      0.61   -0.17               R.AEVSRR.E  16.8       1.1   -0.18               M.IWRSR.A  16.8       1.1   -0.12               K.LEGGGER.R  16.8       1.1   -0.14               R.LWDQR.K  16.8       1.1   -0.18               LWRSR  16.5       1.1   -0.17               K.ISARDR.G  16.5       1.1   -0.16               R.ISASSPR.V  16.5       1.1   -0.18               R.ISWRR.G ``` | |

|  |  |
| --- | --- |
| |  | | --- | | Top scoring peptide matches to query 1224 26: Sum of 2 scans in range 184 (rt=13.4547, f=6, i=10) to 190 (rt=13.7534, f=6, i=11) [\\172.16.3.18\masslynx\2009.PRO\Data\20090825\_30\_qdda.raw] Score greater than 30 indicates identity  ``` Score    Expect   Delta  Hit  Protein Peptide  23.9      0.22   -0.17    9   P02675 K.ISQLTR.M  19.1      0.65   -0.17               R.LSGATIR.I  18.3      0.78   -0.18               R.ISVSRR.T  17.2         1   -0.16               M.IWRSR.A  17.2         1   -0.10               K.LEGGGER.R  17.2         1   -0.11               R.LWDQR.K  17.2         1   -0.16               LWRSR  12.5         3   -0.17               R.VTQLTR.E  11.2       4.1   -0.14               R.AEVSRR.E  11.2       4.1   -0.18               R.SIVRSR.A ``` | |

|  |  |
| --- | --- |
| |  | | --- | | Top scoring peptide matches to query 1225 77: Sum of 2 scans in range 342 (rt=21.2558, f=4, i=37) to 348 (rt=21.5545, f=4, i=38) [\\172.16.3.18\masslynx\2009.PRO\Data\20090821\_17\_qdda.raw] Score greater than 30 indicates identity  ``` Score    Expect   Delta  Hit  Protein Peptide  28.9     0.069   -0.16               R.ISVSRR.T  27.2       0.1   -0.15    9   P02675 K.ISQLTR.M  20.9      0.43   -0.15               R.LSGATIR.I  18.7      0.71   -0.12               R.AEVSRR.E  18.7      0.71   -0.16               R.SIVRSR.A  16.1       1.3   -0.14               M.IWRSR.A  16.1       1.3   -0.07               K.LEGGGER.R  16.1       1.3   -0.09               R.LWDQR.K  16.1       1.3   -0.14               LWRSR  15.9       1.4   -0.12               K.ISARDR.G ``` | |

|  |  |
| --- | --- |
| |  | | --- | | Top scoring peptide matches to query 1227 30: Sum of 4 scans in range 203 (rt=14.5125, f=5, i=20) to 210 (rt=14.861, f=6, i=18) [\\172.16.3.18\masslynx\2009.PRO\Data\20090821\_29\_qdda.raw] Score greater than 21 indicates homology Score greater than 30 indicates identity  ``` Score    Expect   Delta  Hit  Protein Peptide  11.5       3.8   -0.13    9   P02675 K.ISQLTR.M   7.4       9.6   -0.14               R.ISVSRR.T   7.4       9.7   -0.12               M.IWRSR.A   7.4       9.7   -0.05               K.LEGGGER.R   7.4       9.7   -0.07               R.LWDQR.K   7.4       9.7   -0.12               LWRSR   6.9        11   -0.09               R.IETAQR.Q   6.9        11   -0.09               K.LTEAQR.D   6.6        11   -0.13               R.LTLSQR.A   6.3        12   -0.12               R.LLGSQLS.- ``` | |

|  |  |
| --- | --- |
| |  | | --- | | Top scoring peptide matches to query 1228 85: Sum of 2 scans in range 354 (rt=21.7431, f=4, i=33) to 360 (rt=22.0418, f=4, i=34) [\\172.16.3.18\masslynx\2009.PRO\Data\20090824\_33\_qdda.raw] Score greater than 30 indicates identity  ``` Score    Expect   Delta  Hit  Protein Peptide  29.1     0.064   -0.14               R.ISVSRR.T  26.5      0.12   -0.13    9   P02675 K.ISQLTR.M  19.0      0.66   -0.10               R.AEVSRR.E  19.0      0.66   -0.14               R.SIVRSR.A  18.8      0.69   -0.13               R.LSGATIR.I  16.5       1.2   -0.12               M.IWRSR.A  16.5       1.2   -0.05               K.LEGGGER.R  16.5       1.2   -0.07               R.LWDQR.K  16.5       1.2   -0.12               LWRSR  16.2       1.3   -0.10               K.ISARDR.G ``` | |

|  |  |
| --- | --- |
| |  | | --- | | Top scoring peptide matches to query 1229 40: Sum of 2 scans in range 243 (rt=16.478, f=4, i=23) to 249 (rt=16.7767, f=4, i=24) [\\172.16.3.18\masslynx\2009.PRO\Data\20090824\_25\_qdda.raw] Score greater than 15 indicates homology Score greater than 30 indicates identity  ``` Score    Expect   Delta  Hit  Protein Peptide   6.8        11   -0.05               K.LEGGGER.R   1.7        36   -0.12    9   P02675 K.ISQLTR.M   0.1        52   -0.05               K.GELDQR.A ``` | |

|  |  |
| --- | --- |
| |  | | --- | | Top scoring peptide matches to query 1230 44: Sum of 2 scans in range 203 (rt=14.5452, f=2, i=25) to 209 (rt=14.8439, f=2, i=26) [\\172.16.3.18\masslynx\2009.PRO\Data\20090828\_28\_qdda.raw] Score greater than 30 indicates identity  ``` Score    Expect   Delta  Hit  Protein Peptide  22.1      0.32   -0.11    9   P02675 K.ISQLTR.M  19.5      0.59   -0.08               K.LRSGER.I  17.5      0.93   -0.08               K.LSGRER.E  17.5      0.93   -0.07               LSNVER  14.1       2.1   -0.07               R.IGSGVER.M  14.1       2.1   -0.07               R.LQATER.T  13.6       2.3   -0.12               R.ISVSRR.T  12.2       3.2   -0.11               R.LSGATIR.I  11.0       4.2   -0.04               K.LEGGGER.R  10.9       4.3   -0.11               R.VTQLTR.E ``` | |

|  |  |
| --- | --- |
| |  | | --- | | Top scoring peptide matches to query 1231 73: Sum of 2 scans in range 396 (rt=23.7547, f=2, i=73) to 402 (rt=24.0534, f=2, i=74) [\\172.16.3.18\masslynx\2009.PRO\Data\20090821\_13\_qdda.raw] Score greater than 30 indicates identity  ``` Score    Expect   Delta  Hit  Protein Peptide  28.8     0.069   -0.12               R.ISVSRR.T  26.1      0.13   -0.11    9   P02675 K.ISQLTR.M  18.7      0.72   -0.08               R.AEVSRR.E  18.7      0.72   -0.12               R.SIVRSR.A  18.5      0.75   -0.11               R.LSGATIR.I  16.1       1.3   -0.10               M.IWRSR.A  16.1       1.3   -0.03               K.LEGGGER.R  16.1       1.3   -0.05               R.LWDQR.K  16.1       1.3   -0.10               LWRSR  15.8       1.4   -0.08               K.ISARDR.G ``` | |

|  |  |
| --- | --- |
| |  | | --- | | Top scoring peptide matches to query 1232 98: Sum of 2 scans in range 413 (rt=24.3346, f=2, i=66) to 419 (rt=24.6333, f=2, i=67) [\\172.16.3.18\masslynx\2009.PRO\Data\20090824\_37\_qdda.raw] Score greater than 30 indicates identity  ``` Score    Expect   Delta  Hit  Protein Peptide  24.9      0.17   -0.09    9   P02675 K.ISQLTR.M  20.6      0.46   -0.09               R.LSGATIR.I  17.2         1   -0.10               R.ISVSRR.T  13.0       2.6   -0.09               R.VTQLTR.E  10.2         5   -0.03               R.DPSRSR.L  10.2         5   -0.10               R.SIVRSR.A  10.1       5.2   -0.07               R.AEVSRR.E   9.8       5.5   -0.09               R.LGTGTLR.S   9.3       6.2   -0.10               R.VLSSRR.S   8.4       7.6   -0.06               K.SIQDVR.S ``` | |

|  |  |
| --- | --- |
| |  | | --- | | Top scoring peptide matches to query 1235 96: Sum of 3 scans in range 442 (rt=25.3856, f=2, i=88) to 448 (rt=25.6843, f=2, i=89) [\\172.16.3.18\masslynx\2009.PRO\Data\20090824\_45\_qdda.raw] Score greater than 30 indicates identity  ``` Score    Expect   Delta  Hit  Protein Peptide  21.2       0.4   -0.07               R.ISVSRR.T  19.2      0.63   -0.06    9   P02675 K.ISQLTR.M  16.5       1.2   -0.00               R.DPSRSR.L  16.5       1.2   -0.07               R.VLSSRR.S  14.3         2   -0.05               M.IWRSR.A  14.3         2    0.01               K.LEGGGER.R  14.3         2   -0.01               R.LWDQR.K  14.3         2   -0.05               LWRSR  12.4         3   -0.06               R.LSGATIR.I  11.7       3.6   -0.04               R.AEVSRR.E ``` | |

|  |  |
| --- | --- |
| |  | | --- | | Top scoring peptide matches to query 1236 84: Sum of 2 scans in range 431 (rt=25.3822, f=2, i=99) to 437 (rt=25.6809, f=2, i=100) [\\172.16.3.18\masslynx\2009.PRO\Data\20090821\_05\_qdda.raw] Score greater than 30 indicates identity  ``` Score    Expect   Delta  Hit  Protein Peptide  21.4      0.38   -0.06    9   P02675 K.ISQLTR.M  18.4      0.76   -0.06               R.LSGATIR.I  17.3      0.98   -0.07               R.ISVSRR.T  11.7       3.6   -0.03               R.LAPNFR.W  11.5       3.8   -0.07               R.SIVRSR.A  11.0       4.2   -0.06               R.VTQLTR.E  10.3       4.9   -0.06               R.LAALSSR.V  10.2       5.1   -0.03               R.AEVSRR.E   8.8         7   -0.05               M.IWRSR.A   8.8         7   -0.05               LWRSR ``` | |

|  |  |
| --- | --- |
| |  | | --- | | Top scoring peptide matches to query 1237 102: Sum of 3 scans in range 455 (rt=25.7933, f=3, i=27) to 461 (rt=26.0848, f=3, i=29) [\\172.16.3.18\masslynx\2009.PRO\Data\20090825\_06\_qdda.raw] Score greater than 21 indicates homology Score greater than 30 indicates identity  ``` Score    Expect   Delta  Hit  Protein Peptide   9.8       5.5   -0.07               R.ISVSRR.T   7.9       8.6   -0.05               R.LSGATIR.I   5.9        13   -0.04               R.LLGSQLS.-   5.5        15   -0.07               R.SIVRSR.A   4.8        17   -0.05    9   P02675 K.ISQLTR.M   4.5        19   -0.03               R.AEVSRR.E   4.5        19   -0.04               M.IWRSR.A   4.5        19   -0.04               LWRSR   3.5        24    0.02               K.GELDQR.A   2.9        27   -0.02               R.ISASSPR.V ``` | |

|  |  |
| --- | --- |
| |  | | --- | | Top scoring peptide matches to query 1238 91: Sum of 2 scans in range 422 (rt=24.9652, f=2, i=91) to 428 (rt=25.2639, f=2, i=92) [\\172.16.3.18\masslynx\2009.PRO\Data\20090821\_09\_qdda.raw] Score greater than 25 indicates homology Score greater than 30 indicates identity  ``` Score    Expect   Delta  Hit  Protein Peptide  16.4       1.2   -0.06               R.ISVSRR.T  15.7       1.4   -0.05    9   P02675 K.ISQLTR.M  11.8       3.5   -0.02               R.AEVSRR.E  11.7       3.6   -0.02               R.EVARSR.D  10.9       4.3   -0.05               R.LSGATIR.I   9.5       5.9   -0.06               R.SIVRSR.A   7.2        10   -0.02               K.ISARDR.G   7.2        10   -0.01               R.ISASSPR.V   7.2        10   -0.04               R.ISWRR.G   7.2        10   -0.01               K.LSAEAAR.R ``` | |

|  |  |
| --- | --- |
| |  | | --- | | Top scoring peptide matches to query 1241 46: Sum of 2 scans in range 231 (rt=15.7258, f=2, i=33) to 237 (rt=16.0245, f=2, i=34) [\\172.16.3.18\masslynx\2009.PRO\Data\20090824\_33\_qdda.raw] Score greater than 28 indicates identity  ``` Score    Expect   Delta  Hit  Protein Peptide  25.1       0.1   -0.10    6   P02671 R.VSEDLR.S  13.7       1.4   -0.11               K.ADPFLR.S  13.4       1.5   -0.15               VMALLR  13.1       1.6   -0.15               K.VFSPIR.S  13.0       1.6   -0.07               K.VQDSNR.R  12.5       1.8   -0.08               K.WEDLR.R  12.0         2   -0.12               K.VAEMIR.E  12.0         2   -0.19               K.VFLAIR.R  10.5       2.9   -0.11               R.NSQTIR.E   8.4       4.6   -0.12               R.LAMDLR.M ``` | |

|  |  |
| --- | --- |
| |  | | --- | | Top scoring peptide matches to query 1242 37: Sum of 2 scans in range 203 (rt=14.4491, f=2, i=35) to 209 (rt=14.7478, f=2, i=36) [\\172.16.3.18\masslynx\2009.PRO\Data\20090821\_17\_qdda.raw] Score greater than 29 indicates identity  ``` Score    Expect   Delta  Hit  Protein Peptide  24.5      0.14   -0.08    6   P02671 R.VSEDLR.S  16.3      0.96   -0.10               K.VAEMIR.E  16.3      0.96   -0.17               K.VFLAIR.R  16.3      0.96   -0.13               K.VFSPIR.S  16.3      0.96   -0.13               VMALLR  13.0       2.1   -0.06               K.WEDLR.R   9.2       4.9   -0.09               K.ADPFLR.S   7.8       6.8   -0.10               R.LAMDLR.M   7.8       6.8   -0.11               K.TITDLR.T   7.8       6.8   -0.11               TLTDLR ``` | |

|  |  |
| --- | --- |
| |  | | --- | | Top scoring peptide matches to query 1243 24: Sum of 2 scans in range 167 (rt=12.6655, f=6, i=10) to 173 (rt=12.9642, f=6, i=11) [\\172.16.3.18\masslynx\2009.PRO\Data\20090820\_17\_\_\_qdda.raw] Score greater than 29 indicates identity  ``` Score    Expect   Delta  Hit  Protein Peptide  28.0     0.065   -0.07    6   P02671 R.VSEDLR.S  18.1      0.64   -0.09               K.VAEMIR.E  18.1      0.64   -0.16               K.VFLAIR.R  18.1      0.64   -0.12               K.VFSPIR.S  18.1      0.64   -0.13               VMALLR  15.0       1.3   -0.08               R.NSQTIR.E  14.0       1.6   -0.09               K.ADPFLR.S  13.9       1.7   -0.05               K.WEDLR.R  10.8       3.4   -0.09   39   P10643 R.GEPFIR.G  10.3       3.8   -0.08               K.NISASAR.E ``` | |

|  |  |
| --- | --- |
| |  | | --- | | Top scoring peptide matches to query 1244 50: Sum of 6 scans in range 250 (rt=16.4215, f=3, i=17) to 275 (rt=17.6324, f=4, i=19) [\\172.16.3.18\masslynx\2009.PRO\Data\20090824\_37\_qdda.raw] Score greater than 29 indicates identity  ``` Score    Expect   Delta  Hit  Protein Peptide  25.8      0.11   -0.06    6   P02671 R.VSEDLR.S  17.1      0.79   -0.12               VMALLR  15.4       1.2   -0.04               K.WEDLR.R  15.0       1.3   -0.08               K.VAEMIR.E  15.0       1.3   -0.11               K.VFSPIR.S  12.8       2.1   -0.15               K.VFLAIR.R  11.0       3.3   -0.08               R.LAMDLR.M  11.0       3.3   -0.08               K.ADPFLR.S  10.0       4.1   -0.08               K.IMADIR.A  10.0       4.1   -0.08               -.MALDLR.T ``` | |

|  |  |
| --- | --- |
| |  | | --- | | Top scoring peptide matches to query 1245 31: Sum of 8 scans in range 206 (rt=14.4896, f=3, i=14) to 258 (rt=17.0246, f=6, i=15) [\\172.16.3.18\masslynx\2009.PRO\Data\20090821\_13\_qdda.raw] Score greater than 26 indicates homology Score greater than 29 indicates identity  ``` Score    Expect   Delta  Hit  Protein Peptide  15.7       1.1   -0.05    6   P02671 R.VSEDLR.S  15.0       1.3   -0.11               VMALLR  12.2       2.5   -0.07               K.VAEMIR.E  12.2       2.5   -0.14               K.VFLAIR.R  12.2       2.5   -0.10               K.VFSPIR.S   8.0       6.6   -0.03               K.WEDLR.R   7.7         7   -0.05               K.VDLESR.V   7.0       8.2   -0.09               K.TITDLR.T   7.0       8.2   -0.09               TLTDLR   7.0       8.2   -0.07               R.LAMDLR.M ``` | |

|  |  |
| --- | --- |
| |  | | --- | | Top scoring peptide matches to query 1246 41: Sum of 5 scans in range 264 (rt=16.9177, f=3, i=18) to 280 (rt=17.694, f=4, i=13) [\\172.16.3.18\masslynx\2009.PRO\Data\20090824\_41\_qdda.raw] Score greater than 29 indicates identity  ``` Score    Expect   Delta  Hit  Protein Peptide  20.7      0.35   -0.09               VMALLR  18.1      0.64   -0.06               K.VAEMIR.E  18.1      0.64   -0.13               K.VFLAIR.R  18.1      0.64   -0.09               K.VFSPIR.S  18.1      0.64   -0.04    6   P02671 R.VSEDLR.S   8.3       6.1   -0.08               R.DTTLIR.H   8.3       6.1   -0.08               K.ETSLLR.Q   8.3       6.1   -0.13               R.FGIILR.E   8.3       6.1   -0.13               K.GIFLLR.N   8.3       6.1   -0.06               R.GMELIR.R ``` | |

|  |  |
| --- | --- |
| |  | | --- | | Top scoring peptide matches to query 1248 34: Sum of 12 scans in range 269 (rt=17.0587, f=4, i=12) to 310 (rt=18.9791, f=2, i=67) [\\172.16.3.18\masslynx\2009.PRO\Data\20090824\_45\_qdda.raw] Score greater than 25 indicates homology Score greater than 29 indicates identity  ``` Score    Expect   Delta  Hit  Protein Peptide  18.9      0.53   -0.03    6   P02671 R.VSEDLR.S  11.6       2.8   -0.08               VMALLR  11.3       3.1   -0.08               K.VFSPIR.S  10.5       3.6   -0.00               K.WEDLR.R  10.2       3.9   -0.04               K.VAEMIR.E   7.1         8   -0.04               K.ADPFLR.S   6.2       9.9   -0.04               -.MALDLR.T   6.1        10   -0.11               K.VFLAIR.R   6.0        10   -0.04   39   P10643 R.GEPFIR.G   5.8        11   -0.06               K.TITDLR.T ``` | |

|  |  |
| --- | --- |
| |  | | --- | | Top scoring peptide matches to query 1249 35: Sum of 4 scans in range 221 (rt=15.1936, f=3, i=16) to 239 (rt=16.0766, f=3, i=19) [\\172.16.3.18\masslynx\2009.PRO\Data\20090821\_09\_qdda.raw] Score greater than 24 indicates homology Score greater than 29 indicates identity  ``` Score    Expect   Delta  Hit  Protein Peptide  13.7       1.7   -0.02    6   P02671 R.VSEDLR.S  11.0       3.2   -0.08               VMALLR  10.5       3.7   -0.07               K.VFSPIR.S   9.3       4.8   -0.04               K.VAEMIR.E   9.3       4.8   -0.11               K.VFLAIR.R   4.7        14   -0.04               K.IMADIR.A   4.7        14   -0.04               R.LAMDLR.M   4.7        14   -0.04               -.MALDLR.T   4.7        14   -0.06               K.TITDLR.T   4.7        14   -0.06               TLTDLR ``` | |

|  |  |
| --- | --- |
| |  | | --- | | Top scoring peptide matches to query 1250 36: Sum of 8 scans in range 267 (rt=17.389, f=4, i=16) to 314 (rt=19.6753, f=6, i=16) [\\172.16.3.18\masslynx\2009.PRO\Data\20090821\_05\_qdda.raw] Score greater than 29 indicates identity  ``` Score    Expect   Delta  Hit  Protein Peptide  25.5      0.11   -0.01    6   P02671 R.VSEDLR.S  17.6      0.71   -0.06               VMALLR  14.8       1.3   -0.03               K.VAEMIR.E  14.8       1.3   -0.10               K.VFLAIR.R  14.8       1.3   -0.06               K.VFSPIR.S  13.5       1.8    0.01               K.WEDLR.R   9.1       5.1   -0.03               K.IMADIR.A   9.1       5.1   -0.03               R.LAMDLR.M   9.1       5.1   -0.03               -.MALDLR.T   9.1       5.1   -0.05               K.TITDLR.T ``` | |

|  |  |
| --- | --- |
| |  | | --- | | Top scoring peptide matches to query 1259 75: Sum of 2 scans in range 375 (rt=22.7542, f=2, i=62) to 381 (rt=23.0529, f=2, i=63) [\\172.16.3.18\masslynx\2009.PRO\Data\20090824\_29\_qdda.raw] Score greater than 27 indicates homology Score greater than 30 indicates identity  ``` Score    Expect   Delta  Hit  Protein Peptide  36.3     0.013   -0.11   13   P04217 K.ELLVPR.S  12.2       3.3   -0.02               R.ETSHPR.Q  11.6       3.7   -0.04               R.IEDPPR.R  11.6       3.7   -0.02               K.NQPDPR.L  10.1       5.3   -0.05               K.EIHTAR.F  10.1       5.3   -0.05               R.ELHTAR.E  10.1       5.3   -0.11               R.ELPVLR.D   9.9       5.5   -0.04               M.EEPPVR.E   9.0       6.8   -0.09               R.NQVIPR.T   8.8       7.1   -0.09               K.NIQVPR.E ``` | |

|  |  |
| --- | --- |
| |  | | --- | | Top scoring peptide matches to query 1260 55: Sum of 2 scans in range 312 (rt=19.8737, f=4, i=33) to 318 (rt=20.1724, f=4, i=34) [\\172.16.3.18\masslynx\2009.PRO\Data\20090824\_25\_qdda.raw] Score greater than 26 indicates homology Score greater than 30 indicates identity  ``` Score    Expect   Delta  Hit  Protein Peptide  34.1     0.021   -0.11   13   P04217 K.ELLVPR.S  11.0       4.3   -0.02               R.ETSHPR.Q  10.6       4.7   -0.04               R.IEDPPR.R  10.6       4.7   -0.02               K.NQPDPR.L   8.9         7   -0.05               K.EIHTAR.F   8.9         7   -0.05               R.ELHTAR.E   8.9         7   -0.11               R.ELPVLR.D   8.7       7.2   -0.04               M.EEPPVR.E   8.1       8.5   -0.09               R.NQVIPR.T   7.9       8.8   -0.09               K.NIQVPR.E ``` | |

|  |  |
| --- | --- |
| |  | | --- | | Top scoring peptide matches to query 1262 86: Sum of 2 scans in range 385 (rt=23.3705, f=2, i=61) to 391 (rt=23.6692, f=2, i=62) [\\172.16.3.18\masslynx\2009.PRO\Data\20090821\_17\_qdda.raw] Score greater than 28 indicates homology Score greater than 30 indicates identity  ``` Score    Expect   Delta  Hit  Protein Peptide  38.5    0.0077   -0.09   13   P04217 K.ELLVPR.S  12.8       2.9   -0.02               R.IEDPPR.R  11.9       3.5    0.01               R.ETSHPR.Q  11.4       3.9    0.01               K.NQPDPR.L  10.1       5.3   -0.07               R.NQVIPR.T  10.0       5.4   -0.03               K.EIHTAR.F  10.0       5.4   -0.03               R.ELHTAR.E  10.0       5.4   -0.09               R.ELPVLR.D  10.0       5.5   -0.07               K.NIQVPR.E  10.0       5.5   -0.07               K.QVQVPR.G ``` | |

|  |  |
| --- | --- |
| |  | | --- | | Top scoring peptide matches to query 1263 62: Sum of 2 scans in range 326 (rt=20.4895, f=4, i=38) to 332 (rt=20.7882, f=4, i=39) [\\172.16.3.18\masslynx\2009.PRO\Data\20090820\_17\_\_\_qdda.raw] Score greater than 28 indicates homology Score greater than 30 indicates identity  ``` Score    Expect   Delta  Hit  Protein Peptide  30.2     0.051   -0.08   13   P04217 K.ELLVPR.S  13.8       2.3   -0.01               R.IEDPPR.R   9.6       5.9   -0.01               M.EEPPVR.E   9.6         6   -0.06               K.NIQVPR.E   9.6         6   -0.06               K.QVQVPR.G   5.4        16   -0.02               K.EIHTAR.F   5.4        16   -0.02               R.ELHTAR.E   5.4        16   -0.08               R.ELPVLR.D   5.3        16   -0.06               R.NQVIPR.T   4.9        18   -0.06               K.ILNNPR.A ``` | |

|  |  |
| --- | --- |
| |  | | --- | | Top scoring peptide matches to query 1264 96: Sum of 2 scans in range 395 (rt=23.7579, f=3, i=54) to 401 (rt=24.0566, f=3, i=55) [\\172.16.3.18\masslynx\2009.PRO\Data\20090824\_33\_qdda.raw] Score greater than 24 indicates homology Score greater than 30 indicates identity  ``` Score    Expect   Delta  Hit  Protein Peptide  31.3      0.04   -0.08   13   P04217 K.ELLVPR.S  10.4         5   -0.01               R.IEDPPR.R  10.4         5    0.02               K.NQPDPR.L   9.8       5.6    0.02               R.ETSHPR.Q   8.0       8.6   -0.02               K.EIHTAR.F   8.0       8.6   -0.02               R.ELHTAR.E   8.0       8.6   -0.08               R.ELPVLR.D   7.8       8.9   -0.01               M.EEPPVR.E   7.1        10   -0.06               R.NQVIPR.T   7.0        11   -0.06               K.NIQVPR.E ``` | |

|  |  |
| --- | --- |
| |  | | --- | | Top scoring peptide matches to query 1265 85: Sum of 2 scans in range 430 (rt=25.4138, f=2, i=77) to 436 (rt=25.7125, f=2, i=78) [\\172.16.3.18\masslynx\2009.PRO\Data\20090821\_13\_qdda.raw] Score greater than 16 indicates homology Score greater than 30 indicates identity  ``` Score    Expect   Delta  Hit  Protein Peptide  16.5       1.2   -0.07   13   P04217 K.ELLVPR.S   2.4        31    0.00               R.IEDPPR.R   0.6        47   -0.04               R.NQVIPR.T   0.4        49    0.03               R.ETSHPR.Q   0.4        49   -0.04               K.NIQVPR.E   0.4        49   -0.04               K.QVQVPR.G   0.2        51    0.00               M.EEPPVR.E ``` | |

|  |  |
| --- | --- |
| |  | | --- | | Top scoring peptide matches to query 1266 102: Sum of 3 scans in range 441 (rt=25.8979, f=7, i=33) to 447 (rt=26.1894, f=7, i=35) [\\172.16.3.18\masslynx\2009.PRO\Data\20090821\_09\_qdda.raw] Score greater than 18 indicates homology Score greater than 30 indicates identity  ``` Score    Expect   Delta  Hit  Protein Peptide  18.7      0.73   -0.04   13   P04217 K.ELLVPR.S   3.9        22    0.02               R.AASPAGPR.K   3.9        22    0.05               R.ETSHPR.Q   3.2        26    0.03               R.IEDPPR.R   3.2        26    0.05               K.NQPDPR.L   0.5        48   -0.02               R.NQVIPR.T ``` | |

|  |  |
| --- | --- |
| |  | | --- | | Top scoring peptide matches to query 1267 97: Sum of 2 scans in range 463 (rt=26.9491, f=5, i=37) to 469 (rt=27.2478, f=5, i=38) [\\172.16.3.18\masslynx\2009.PRO\Data\20090821\_05\_qdda.raw] Score greater than 17 indicates homology Score greater than 30 indicates identity  ``` Score    Expect   Delta  Hit  Protein Peptide  17.4      0.99   -0.03   13   P04217 K.ELLVPR.S   3.3        25   -0.00               R.NQVIPR.T   3.1        27    0.04               R.IEDPPR.R ``` | |

|  |  |
| --- | --- |
| |  | | --- | | Top scoring peptide matches to query 1270 53: Sum of 2 scans in range 347 (rt=21.7864, f=3, i=44) to 363 (rt=22.5768, f=5, i=39) [\\172.16.3.18\masslynx\2009.PRO\Data\20090908\_09\_qdda.raw] Score greater than 24 indicates homology Score greater than 29 indicates identity  ``` Score    Expect   Delta  Hit  Protein Peptide  11.7         3    0.12   13   P04217 K.ELLVPR.S ``` | |

|  |  |
| --- | --- |
| |  | | --- | | Top scoring peptide matches to query 1271 65: Sum of 7 scans in range 397 (rt=24.251, f=7, i=51) to 429 (rt=25.8245, f=6, i=45) [\\172.16.3.18\masslynx\2009.PRO\Data\20090908\_09\_qdda.raw] Score greater than 22 indicates homology Score greater than 29 indicates identity  ``` Score    Expect   Delta  Hit  Protein Peptide  10.0       4.3    0.12   13   P04217 K.ELLVPR.S ``` | |

|  |  |
| --- | --- |
| |  | | --- | | Top scoring peptide matches to query 1289 19: Sum of 2 scans in range 147 (rt=11.5308, f=2, i=10) to 153 (rt=11.8295, f=2, i=11) [\\172.16.3.18\masslynx\2009.PRO\Data\20090825\_22\_qdda.raw] Score greater than 15 indicates homology Score greater than 28 indicates identity  ``` Score    Expect   Delta  Hit  Protein Peptide   8.5       5.2   -0.13               R.GGASGLLR.A   8.5       5.2   -0.13               K.NAGSLLR.A   2.3        22   -0.08    2   P01024 R.TLDPER.L   1.9        24   -0.15               R.TVEILR.D   1.5        26   -0.15               K.ITDILR.T   1.4        26   -0.07               K.MIASHR.F   1.4        27   -0.11               K.EAELIR.N   1.4        27   -0.11               R.EAELLR.K   1.4        27   -0.15               R.ELSILR.G   1.4        27   -0.15               K.ELSLIR.A ``` | |

|  |  |
| --- | --- |
| |  | | --- | | Top scoring peptide matches to query 1290 18: Sum of 4 scans in range 147 (rt=11.5467, f=2, i=13) to 168 (rt=12.5791, f=3, i=9) [\\172.16.3.18\masslynx\2009.PRO\Data\20090824\_37\_qdda.raw] Score greater than 25 indicates homology Score greater than 28 indicates identity  ``` Score    Expect   Delta  Hit  Protein Peptide  12.5       2.1   -0.12               K.NAGSLLR.A  11.4       2.7   -0.12               R.GGASGLLR.A   8.4       5.3   -0.15               K.ITDILR.T   8.4       5.3   -0.07    2   P01024 R.TLDPER.L   6.7       7.9   -0.15               R.TVEILR.D   3.9        15   -0.11               AEEILR   3.9        15   -0.11               K.AEELLR.Q   3.9        15   -0.15               R.DTLLIR.E   3.9        15   -0.11               K.EAELIR.N   3.9        15   -0.11               R.EAELLR.K ``` | |

|  |  |
| --- | --- |
| |  | | --- | | Top scoring peptide matches to query 1292 6: Sum of 2 scans in range 149 (rt=11.5581, f=2, i=14) to 155 (rt=11.8568, f=2, i=15) [\\172.16.3.18\masslynx\2009.PRO\Data\20090825\_14\_qdda.raw] Score greater than 15 indicates homology Score greater than 28 indicates identity  ``` Score    Expect   Delta  Hit  Protein Peptide  10.2       3.5   -0.11               R.GGASGLLR.A  10.2       3.5   -0.11               K.NAGSLLR.A   2.3        22   -0.14               K.ITDILR.T   2.3        22   -0.06    2   P01024 R.TLDPER.L   2.0        23   -0.10               AEEILR   2.0        23   -0.10               K.AEELLR.Q   2.0        23   -0.14               R.DTLLIR.E   2.0        23   -0.10               K.EAELIR.N   2.0        23   -0.10               R.EAELLR.K   2.0        23   -0.14               R.ELSILR.G ``` | |

|  |  |
| --- | --- |
[truncated: 2,240,254 more chars]
