# Supplementary material for: Relative Quantification of Several Plasma Proteins during Liver Transplantation Surgery
Source: Hindawi journal article supplement (doi:10.1155/2011/248613), 2011-01-01
Supplement: f1 [file 248613.f1.zip › AddFile3_P2re-P3re.htm]

Select Summary Report (AddFile3\_Patient2\_repeat-Patient3\_repeat)


# Mascot Search Results

```
Database               : SwissProt 57.8 (509019 sequences; 178948533 residues)
Taxonomy               : Homo sapiens (human) (20401 sequences)
Enzyme                 : Trypsin
Fixed modifications    : Methylthio (C),iTRAQ8plex (N-term),iTRAQ8plex (K)
Variable modifications : Oxidation (M)
Mass values            : Monoisotopic
Protein Mass           : Unrestricted
Peptide Mass Tolerance : ± 0.2 Da
Fragment Mass Tolerance: ± 0.1 Da
Max Missed Cleavages   : 2
Instrument type        : ESI-QUAD-TOF
Number of queries      : 11761

|  |  |  |  |  |  |  |  |  |
| --- | --- | --- | --- | --- | --- | --- | --- | --- |
| Protein hits           : | Patient3-Art/Control | Patient3-Porta/Control | Patient3-Hepa/Control | Patient2-Art/Control | Patient2-Porta/Control | Patient2-Hepa/Control |  |  |
|  | 1.227 | 1.099 | 1.564 | 0.831 | 0.820 | 1.174 | P01023 | Alpha-2-macroglobulin OS=Homo sapiens GN=A2M PE=1 SV=1 |
|  | 0.852 | 0.951 | 0.865 | 0.792 | 0.790 | 0.949 | P01024 | Complement C3 OS=Homo sapiens GN=C3 PE=1 SV=2 |
|  | 0.905 | 0.916 | 0.729 | 0.929 | 0.925 | 0.910 | P02671 | Fibrinogen alpha chain OS=Homo sapiens GN=FGA PE=1 SV=2 |
|  | 1.187 | 1.367 | 1.334 | 0.859 | 0.812 | 0.984 | P04114 | Apolipoprotein B-100 OS=Homo sapiens GN=APOB PE=1 SV=1 |
|  | 0.907 | 0.761 | 0.850 | 1.454 | 1.642 | 1.066 | P02647 | Apolipoprotein A-I OS=Homo sapiens GN=APOA1 PE=1 SV=1 |
|  | 0.910 | 1.103 | 1.053 | 1.339 | 1.400 | 1.241 | P02652 | Apolipoprotein A-II OS=Homo sapiens GN=APOA2 PE=1 SV=1 |
|  | 0.680 | 0.761 | 0.694 | 0.662 | 0.560 | 0.773 | P01011 | Alpha-1-antichymotrypsin OS=Homo sapiens GN=SERPINA3 PE=1 SV=2 |
|  | 0.926 | 1.071 | 0.711 | 1.099 | 1.005 | 0.893 | P02675 | Fibrinogen beta chain OS=Homo sapiens GN=FGB PE=1 SV=2 |
|  | 1.043 | 1.137 | 0.929 | 0.920 | 0.837 | 0.830 | P00450 | Ceruloplasmin OS=Homo sapiens GN=CP PE=1 SV=1 |
|  | 0.988 | 1.011 | 0.908 | 0.980 | 0.956 | 1.009 | P02790 | Hemopexin OS=Homo sapiens GN=HPX PE=1 SV=2 |
|  | 1.274 | 1.175 | 1.169 | 1.146 | 0.970 | 0.989 | P02765 | Alpha-2-HS-glycoprotein OS=Homo sapiens GN=AHSG PE=1 SV=1 |
|  | 0.848 | 0.813 | 0.805 | 1.021 | 0.969 | 0.989 | P02679 | Fibrinogen gamma chain OS=Homo sapiens GN=FGG PE=1 SV=3 |
|  | 1.013 | 1.114 | 1.050 | 0.990 | 0.987 | 0.967 | P02774 | Vitamin D-binding protein OS=Homo sapiens GN=GC PE=1 SV=1 |
|  | 0.942 | 1.038 | 0.945 | 0.946 | 0.968 | 0.896 | P02766 | Transthyretin OS=Homo sapiens GN=TTR PE=1 SV=1 |
|  | 1.144 | 0.949 | 0.985 | 0.998 | 1.035 | 0.799 | P00751 | Complement factor B OS=Homo sapiens GN=CFB PE=1 SV=2 |
|  | 1.241 | 1.272 | 1.095 | 1.051 | 0.933 | 0.875 | P04217 | Alpha-1B-glycoprotein OS=Homo sapiens GN=A1BG PE=1 SV=3 |
|  | 1.156 | 1.137 | 1.213 | 0.977 | 0.866 | 0.896 | P01008 | Antithrombin-III OS=Homo sapiens GN=SERPINC1 PE=1 SV=1 |
|  | 0.769 | 0.932 | 0.614 | 0.882 | 0.834 | 0.820 | P06727 | Apolipoprotein A-IV OS=Homo sapiens GN=APOA4 PE=1 SV=3 |
|  | 0.878 | 0.951 | 0.676 | 0.967 | 1.155 | 0.623 | P04196 | Histidine-rich glycoprotein OS=Homo sapiens GN=HRG PE=1 SV=1 |
|  | 1.042 | 0.941 | 0.766 | 0.864 | 0.993 | 0.979 | P0C0L4 | Complement C4-A OS=Homo sapiens GN=C4A PE=1 SV=1 |
|  | 0.936 | 0.905 | 0.793 | 0.969 | 0.947 | 0.887 | P08697 | Alpha-2-antiplasmin OS=Homo sapiens GN=SERPINF2 PE=1 SV=3 |
|  | 0.998 | 1.267 | 1.210 | 1.072 | 0.946 | 1.158 | P05155 | Plasma protease C1 inhibitor OS=Homo sapiens GN=SERPING1 PE=1 SV=2 |
|  | 0.948 | 0.969 | 0.860 | 0.888 | 0.892 | 0.891 | P08603 | Complement factor H OS=Homo sapiens GN=CFH PE=1 SV=4 |
|  | 1.731 | 2.014 | 1.758 | 1.041 | 1.228 | 1.143 | P02649 | Apolipoprotein E OS=Homo sapiens GN=APOE PE=1 SV=1 |
|  | 1.584 | 1.676 | 1.331 | 1.376 | 1.140 | 1.121 | P01042 | Kininogen-1 OS=Homo sapiens GN=KNG1 PE=1 SV=2 |
|  | 0.885 | 1.087 | 0.848 | 0.835 | 0.762 | 0.759 | Q14624 | Inter-alpha-trypsin inhibitor heavy chain H4 OS=Homo sapiens GN=ITIH4 PE=1 SV=4 |
|  | 0.577 | 0.631 | 0.707 | 0.910 | 0.949 | 1.027 | P01834 | Ig kappa chain C region OS=Homo sapiens GN=IGKC PE=1 SV=1 |
|  | 0.931 | 0.522 | 0.875 | 0.863 | 0.949 | 0.896 | Patient39823 | Inter-alpha-trypsin inhibitor heavy chain H2 OS=Homo sapiens GN=ITIH2 PE=1 SV=2 |
|  | 0.684 | 0.777 | 0.723 | 0.679 | 0.651 | 0.823 | P01871 | Ig mu chain C region OS=Homo sapiens GN=IGHM PE=1 SV=3 |
|  | --- | --- | --- | --- | --- | --- | Patient25311 | Zinc-alpha-2-glycoprotein OS=Homo sapiens GN=AZGPatient3 PE=1 SV=1 |
|  | 1.263 | 1.120 | 1.382 | 2.131 | 2.031 | 7.369 | P04264 | Keratin, type II cytoskeletal 1 OS=Homo sapiens GN=KRT1 PE=1 SV=6 |
|  | 1.601 | 1.416 | 1.319 | 1.722 | 1.141 | 1.606 | P04003 | C4b-binding protein alpha chain OS=Homo sapiens GN=C4BPA PE=1 SV=2 |
|  | 1.033 | 1.107 | 1.226 | 0.846 | 1.072 | 0.971 | Patient27169 | Serum paraoxonase/arylesterase 1 OS=Homo sapiens GN=PON1 PE=1 SV=2 |
|  | --- | --- | --- | --- | --- | --- | P01019 | Angiotensinogen OS=Homo sapiens GN=AGT PE=1 SV=1 |
|  | 0.762 | 0.762 | 0.913 | 0.736 | 0.705 | 1.054 | P02763 | Alpha-1-acid glycoprotein 1 OS=Homo sapiens GN=ORM1 PE=1 SV=1 |
|  | 1.921 | 2.016 | 2.346 | --- | 1.256 | 2.042 | P02760 | Protein AMBP OS=Homo sapiens GN=AMBP PE=1 SV=1 |
|  | 0.968 | 0.953 | 0.842 | 1.110 | 1.052 | 0.985 | P02749 | Beta-2-glycoprotein 1 OS=Homo sapiens GN=APOH PE=1 SV=3 |
|  | --- | --- | --- | --- | --- | --- | Patient39827 | Inter-alpha-trypsin inhibitor heavy chain H1 OS=Homo sapiens GN=ITIH1 PE=1 SV=3 |
|  | --- | --- | --- | --- | --- | --- | P00734 | Prothrombin OS=Homo sapiens GN=F2 PE=1 SV=2 |
|  | --- | --- | --- | --- | --- | --- | P51884 | Lumican OS=Homo sapiens GN=LUM PE=1 SV=2 |
|  | --- | --- | --- | --- | --- | --- | P02655 | Apolipoprotein C-II OS=Homo sapiens GN=APOC2 PE=1 SV=1 |
|  | --- | --- | --- | --- | --- | --- | P02751 | Fibronectin OS=Homo sapiens GN=FN1 PE=1 SV=3 |
|  | --- | --- | --- | --- | --- | --- | P43652 | Afamin OS=Homo sapiens GN=AFM PE=1 SV=1 |
|  | --- | --- | --- | --- | --- | --- | Q9NP78 | ATP-binding cassette sub-family B member 9 OS=Homo sapiens GN=ABCB9 PE=1 SV=1 |
|  | --- | --- | --- | --- | --- | --- | P36955 | Pigment epithelium-derived factor OS=Homo sapiens GN=SERPINF1 PE=1 SV=3 |
|  | --- | --- | --- | --- | --- | --- | P02748 | Complement component C9 OS=Homo sapiens GN=C9 PE=1 SV=2 |
|  | --- | --- | --- | --- | --- | --- | P01031 | Complement C5 OS=Homo sapiens GN=C5 PE=1 SV=4 |
|  | --- | --- | --- | --- | --- | --- | Patient33645 | Keratin, type I cytoskeletal 10 OS=Homo sapiens GN=KRT10 PE=1 SV=5 |
|  | --- | --- | --- | --- | --- | --- | P02753 | Retinol-binding protein 4 OS=Homo sapiens GN=RBP4 PE=1 SV=3 |
|  | --- | --- | --- | --- | --- | --- | P68871 | Hemoglobin subunit beta OS=Homo sapiens GN=HBB PE=1 SV=2 |
|  | --- | --- | --- | --- | --- | --- | Patient30643 | Complement component C7 OS=Homo sapiens GN=C7 PE=1 SV=2 |
|  | --- | --- | --- | --- | --- | --- | P05156 | Complement factor I OS=Homo sapiens GN=CFI PE=1 SV=1 |
|  | --- | --- | --- | --- | --- | --- | P05452 | Tetranectin OS=Homo sapiens GN=CLEC3B PE=1 SV=2 |
|  | --- | --- | --- | --- | --- | --- | P02743 | Serum amyloid P-component OS=Homo sapiens GN=APCS PE=1 SV=2 |
|  | --- | --- | --- | --- | --- | --- | P06681 | Complement C2 OS=Homo sapiens GN=C2 PE=1 SV=2 |
|  | --- | --- | --- | --- | --- | --- | Q9HC10 | Otoferlin OS=Homo sapiens GN=OTOF PE=1 SV=3 |
|  | --- | --- | --- | --- | --- | --- | Q5T8A7 | Protein KIAA0649 OS=Homo sapiens GN=KIAA0649 PE=1 SV=1 |
```

|  | SwissProt | Decoy | False discovery rate |
| --- | --- | --- | --- |
| Peptide matches above identity threshold | 1274 | 17 | 1.33 % |
| Peptide matches above homology or identity threshold | 1703 | 28 | 1.64 % |

### Select Summary Report

|  |  |  |  |
| --- | --- | --- | --- |
|  | Peptide Summary Select Summary (protein hits) Select Summary (unassigned) Export Search Results |  | Help |
|  | Significance threshold p< | Max. number of hits |  |
|  | Standard scoring  MudPIT scoring | Ions score or expect cut-off | Show sub-sets |
|  | Show pop-ups  Suppress pop-ups | Sort unassigned  Decreasing Score Increasing query / Mr Decreasing Intensity | Require bold red |
|  | Protein ratio type  Average Median Weighted | Normalisation  None Average ratio Median ratio Summed intensities | Help |
|  | Report peptide ratios | Outlier removal  None Automatic Dixon's method Grubbs' method Rosner's method | Min. # peptides |
|  | Min. precursor charge | Peptide threshold  Minimum score of Maximum expect of At least identity At least homology |  |


|  |  |
| --- | --- |
| **1.** | P01023    **Mass:** 191703   **Score:** 9521   **Queries matched:** 817   **emPAI:** 3.31 |
|  | Alpha-2-macroglobulin OS=Homo sapiens GN=A2M PE=1 SV=1 |

|  |  |  |  |  |  |
| --- | --- | --- | --- | --- | --- |
|  | **Quantitation:** | **Ratio** | **Weighted** | **N** | **SD(geo)** |
|  |  | Patient3-Art/Control | 1.227 | 300 | NN |
|  |  | Patient3-Porta/Control | 1.099 | 297 | NN |
|  |  | Patient3-Hepa/Control | 1.564 | 296 | NN |
|  |  | Patient2-Art/Control | 0.831 | 291 | NN |
|  |  | Patient2-Porta/Control | 0.820 | 292 | NN |
|  |  | Patient2-Hepa/Control | 1.174 | 295 | NN |

|  |  |  |  |  |  |  |  |  |  |  |  |  |  |  |  |  |
| --- | --- | --- | --- | --- | --- | --- | --- | --- | --- | --- | --- | --- | --- | --- | --- | --- |
|  | **Query** | **Observed** | **Mr(expt)** | **Mr(calc)** | **Delta** | **Miss** | **Score** | **Expect** | **Rank** | **Patient3-Art/Control** | **Patient3-Porta/Control** | **Patient3-Hepa/Control** | **Patient2-Art/Control** | **Patient2-Porta/Control** | **Patient2-Hepa/Control** | **Peptide** |
|  | 375 | **476.26** | **950.51** | **950.62** | **-0.11** | **0** | **25** | **0.12** | **1** | **---** | **---** | **---** | **---** | **---** | **---** | **K.VIFIR.G** 365 367 368 369 370 372 373 374 376 377 378 379 380 381 382 383 384 385 386 387 388 389 390 391 392 393 394 395 396 397 398 399 400 401 402 |
|  | 1457 | **566.80** | **1131.58** | **1131.66** | **-0.08** | **0** | **33** | **0.034** | **1** | **0.632** | **0.866** | **1.186** | **0.562** | **0.833** | **1.332** | **K.SDIAPVAR.L** |
|  | 1528 | **570.30** | **1138.58** | **1138.72** | **-0.14** | **0** | **13** | **4.6** | **1** | **---** | **---** | **---** | **---** | **---** | **---** | **R.LVDGK.G** 1530 1531 |
|  | 1767 | **590.82** | **1179.63** | **1179.78** | **-0.15** | **0** | **8** | **14** | **2** | **---** | **---** | **---** | **---** | **---** | **---** | **K.VVVQK.K** |
|  | 1860 | **595.81** | **1189.60** | **1189.64** | **-0.04** | **0** | **15** | **1.4** | **1** | **---** | **---** | **---** | **---** | **---** | **---** | **K.YGAATFTR.T** |
|  | 1931 | **601.33** | **1200.65** | **1200.77** | **-0.11** | **0** | **16** | **1.4** | **1** | **---** | **---** | **---** | **---** | **---** | **---** | **K.LSFVK.V** 1927 1930 1939 1940 1941 1942 1943 1944 1945 1946 1947 1949 |
|  | 2187 | **621.90** | **1241.79** | **1241.80** | **-0.01** | **0** | **14** | **2.5** | **1** | **---** | **---** | **---** | **---** | **---** | **---** | **K.VFQLK.R** 2184 |
|  | 2464 | **655.81** | **1309.61** | **1309.67** | **-0.06** | **0** | **17** | **0.91** | **1** | **---** | **---** | **---** | **---** | **---** | **---** | **K.FQVDNNNR.L** |
|  | 2589 | **666.85** | **1331.68** | **1331.84** | **-0.16** | **0** | **26** | **0.13** | **1** | **---** | **---** | **---** | **---** | **---** | **---** | **K.GVPIPNK.V** 2590 2592 |
|  | 2764 | **687.40** | **1372.78** | **1372.82** | **-0.04** | **0** | **37** | **0.022** | **1** | **0.691** | **0.952** | **1.305** | **0.281** | **0.721** | **1.095** | **R.GEAFTLK.A** 2755 2756 2757 2758 2759 2760 2761 2762 2763 2765 |
|  | 3117 | **726.86** | **1451.71** | **1451.82** | **-0.11** | **0** | **31** | **0.038** | **1** | **1.382** | **1.484** | **2.064** | **0.874** | **0.832** | **1.386** | **R.QGIPFFGQVR.L** 3118 3120 |
|  | 3305 | **757.88** | **1513.74** | **1513.84** | **-0.10** | **0** | **56** | **0.00015** | **1** | **1.109** | **0.920** | **0.839** | **0.532** | **0.442** | **0.610** | **K.LPPNVVEESAR.A** 3302 3303 3304 3306 3307 3308 3309 3310 3311 3312 3313 3314 3315 3316 |
|  | 3376 | **511.97** | **1532.89** | **1532.95** | **-0.06** | **0** | **8** | **8.9** | **1** | **---** | **---** | **---** | **---** | **---** | **---** | **R.TGTHGLLVK.Q** |
|  | 3479 | **780.37** | **1558.72** | **1558.84** | **-0.12** | **0** | **54** | **0.00017** | **1** | **1.414** | **1.413** | **1.481** | **1.075** | **0.774** | **1.551** | **K.AIGYLNTGYQR.Q** 3469 3470 3472 3474 3478 3480 3482 3487 3488 3489 3490 3491 3493 |
|  | 3510 | **783.36** | **1564.71** | **1564.84** | **-0.13** | **0** | **52** | **0.00024** | **1** | **1.689** | **1.337** | **1.202** | **0.911** | **0.909** | **0.845** | **R.VTAAPQSVCALR.A** 3505 3506 3507 3508 3509 3511 3512 3513 3514 3515 3517 3518 3519 3520 3521 3522 3523 |
|  | 3579 | **790.35** | **1578.68** | **1578.77** | **-0.09** | **0** | **45** | **0.00069** | **1** | **1.253** | **1.956** | **1.778** | **0.693** | **0.751** | **0.934** | **R.VGFYESDVMGR.G** 3578 3580 3581 3583 3585 |
|  | 3693 | **813.92** | **1625.82** | **1626.00** | **-0.17** | **0** | **55** | **0.00017** | **1** | **1.118** | **1.186** | **1.466** | **0.528** | **0.750** | **1.103** | **K.ATVLNYLPK.C** 3694 3695 |
|  | 3851 | **827.94** | **1653.87** | **1653.99** | **-0.12** | **0** | **45** | **0.0021** | **1** | **1.251** | **1.212** | **1.255** | **0.582** | **0.539** | **0.888** | **K.FEVQVTVPK.I** |
|  | 4115 | **571.30** | **1710.87** | **1711.01** | **-0.13** | **0** | **64** | **2.5e-005** | **1** | **1.146** | **1.550** | **1.679** | **0.834** | **0.944** | **1.343** | **R.SSGSLLNNAIK.G** 4116 4117 4118 4120 4122 4123 4124 4126 4128 4129 |
|  | 4167 | **575.65** | **1723.94** | **1724.01** | **-0.07** | **0** | **45** | **0.0019** | **1** | **4.445** | **4.245** | **2.047** | **1.883** | **2.589** | **1.592** | **R.QTVSWAVTPK.S** 4165 4166 4168 |
|  | 4266 | **586.98** | **1757.92** | **1757.98** | **-0.06** | **0** | **32** | **0.04** | **1** | **0.865** | **0.512** | **0.479** | **0.461** | **0.456** | **0.740** | **R.SASNMAIVDVK.M** 4262 4263 |
|  | 4427 | **599.36** | **1795.05** | **1795.17** | **-0.12** | **0** | **8** | **9** | **1** | **---** | **---** | **---** | **---** | **---** | **---** | **R.DLKPAIVK.V** |
|  | 4536 | **608.26** | **1821.77** | **1821.92** | **-0.15** | **0** | **47** | **0.00033** | **1** | **1.489** | **1.252** | **1.604** | **0.858** | **0.776** | **0.915** | **K.YDVENCLANK.V** 4534 4537 4538 4539 4540 4541 4542 4543 |
|  | 4719 | **617.31** | **1848.91** | **1849.00** | **-0.09** | **0** | **24** | **0.18** | **1** | **---** | **---** | **---** | **---** | **---** | **---** | **R.LVHVEEPHTETVR.K** |
|  | 4777 | **622.00** | **1862.99** | **1863.05** | **-0.06** | **0** | **(23)** | **0.38** | **1** | **---** | **---** | **---** | **---** | **---** | **---** | **K.AIGYLNTGYQR.Q** 4774 4775 4776 4780 4781 |
|  | 4778 | **622.01** | **1863.00** | **1863.05** | **-0.05** | **0** | **(15)** | **2.2** | **1** | **---** | **---** | **---** | **---** | **---** | **---** | **K.AIGYLNTGYQR.Q** 4773 4779 4782 |
|  | 4818 | **625.01** | **1872.01** | **1872.07** | **-0.05** | **0** | **39** | **0.0095** | **1** | **0.644** | **0.837** | **1.377** | **0.502** | **0.640** | **1.018** | **K.LSFYYLIMAK.G** 4813 4814 4816 4820 |
|  | 5056 | **644.36** | **1930.05** | **1930.20** | **-0.15** | **0** | **(10)** | **6.4** | **1** | **---** | **---** | **---** | **---** | **---** | **---** | **K.ATVLNYLPK.C** |
|  | 5078 | **645.99** | **1934.96** | **1935.02** | **-0.06** | **0** | **53** | **0.00031** | **1** | **1.256** | **1.147** | **1.416** | **0.856** | **1.090** | **0.674** | **R.NALFCLESAWK.T** 5069 5070 5074 5077 |
|  | 5210 | **654.41** | **1960.20** | **1960.24** | **-0.05** | **1** | **15** | **2.2** | **1** | **---** | **---** | **---** | **---** | **---** | **---** | **K.GVPIPNKVIFIR.G** |
|  | 5374 | **668.31** | **2001.90** | **2002.08** | **-0.19** | **0** | **60** | **2.5e-005** | **1** | **1.311** | **0.266** | **2.334** | **0.812** | **0.926** | **1.937** | **K.NEDSLVFVQTDK.S** 5376 5377 5378 5379 5380 5381 5382 |
|  | 5548 | **686.36** | **2056.06** | **2056.05** | **0.01** | **0** | **42** | **0.0037** | **1** | **6.611** | **4.685** | **3.089** | **1.755** | **2.514** | **2.116** | **K.DMYSFLEDMGLK.A** |
|  | 5628 | **691.67** | **2072.00** | **2072.04** | **-0.05** | **0** | **(35)** | **0.014** | **1** | **1.050** | **1.251** | **1.290** | **0.951** | **0.808** | **1.154** | **K.DMYSFLEDMGLK.A** |
|  | 5702 | **700.70** | **2099.07** | **2099.20** | **-0.13** | **0** | **46** | **0.0015** | **1** | **2.356** | **2.366** | **1.634** | **1.571** | **1.014** | **1.434** | **R.NQGNTWLTAFVLK.T** 5700 5701 5703 |
|  | 5782 | **707.36** | **2119.07** | **2119.17** | **-0.11** | **0** | **67** | **1.2e-005** | **1** | **1.085** | **2.520** | **2.468** | **1.380** | **0.897** | **2.663** | **K.AAQVTIQSSGTFSSK.F** 5755 5756 5760 5764 5776 5784 5785 5789 5790 5791 5792 5793 5794 5803 5805 5806 5808 5821 5822 5823 5825 5827 5829 5830 5833 5835 5836 5838 5840 5841 5844 5847 5850 5853 5857 5864 5865 5866 5867 5870 5872 5878 5881 5882 5883 |
|  | 5926 | **709.66** | **2125.96** | **2126.13** | **-0.17** | **0** | **(9)** | **2.7** | **1** | **---** | **---** | **---** | **---** | **---** | **---** | **K.YDVENCLANK.V** |
|  | 6007 | **718.03** | **2151.06** | **2151.15** | **-0.10** | **0** | **47** | **0.00094** | **1** | **0.438** | **0.970** | **0.839** | **1.267** | **1.019** | **1.344** | **K.VTGEGCVYLQTSLK.Y** 5985 5987 5990 5991 5992 5993 5994 5995 5998 6000 6001 6002 6003 6004 6005 6008 6010 6011 6012 6016 6017 6018 6020 6024 6025 6026 6028 6032 6036 6040 6042 6045 6047 6048 6049 6050 6051 6052 6054 6055 6058 6059 6061 6062 6063 6064 6066 6067 6068 6248 | **725.39** | **2173.15** | **2173.24** | **-0.08** | **0** | **78** | **9.8e-007** | **1** | **0.932** | **1.018** | **1.341** | **0.645** | **0.541** | **1.187** | **K.ALLAYAFALAGNQDK.R** 6232 6233 6234 6235 6236 6238 6239 6240 6241 6242 6243 6244 6252 6253 6255 |
|  | 6565 | **738.36** | **2212.06** | **2212.25** | **-0.18** | **0** | **68** | **7.2e-006** | **1** | **2.102** | **1.719** | **1.796** | **1.171** | **1.070** | **0.989** | **R.IAQWQSFQLEGGLK.Q** 6568 6573 6574 6575 6576 6584 6587 6588 6591 6593 6599 6602 6603 6604 6606 6607 6608 6610 6611 6612 6613 6615 6618 6619 6620 6621 6622 6625 6628 6629 6634 |
|  | 6830 | **761.05** | **2280.12** | **2280.26** | **-0.14** | **0** | **60** | **4.5e-005** | **1** | **0.857** | **0.557** | **1.371** | **0.575** | **0.786** | **1.054** | **R.TEHPFTVEEFVLPK.F** 6828 6829 6831 6832 6833 6834 6836 |
|  | 6923 | **577.09** | **2304.33** | **2304.37** | **-0.04** | **1** | **33** | **0.036** | **1** | **1.048** | **0.911** | **1.737** | **0.614** | **0.948** | **1.666** | **K.KLSFYYLIMAK.G** |
|  | 7049 | **774.74** | **2321.20** | **2321.24** | **-0.04** | **0** | **54** | **0.00024** | **1** | **0.965** | **1.218** | **2.197** | **1.266** | **1.017** | **2.052** | **K.SSSNEEVMFLTVQVK.G** 6978 6979 6980 6981 6982 6983 6984 6986 6988 6990 6991 6992 6994 6996 7002 7004 7006 7007 7011 7014 7015 7017 7018 7019 7020 7021 7023 7024 7025 7026 7028 7030 7031 7032 7033 7035 7036 7037 7038 7041 7043 7044 7045 7046 7047 7050 7053 7054 7056 7098 | **777.10** | **2328.27** | **2328.44** | **-0.16** | **0** | **22** | **0.47** | **1** | **---** | **---** | **---** | **---** | **---** | **---** | **K.MVSGFIPLKPTVK.M** 7099 7101 |
|  | 7107 | **583.32** | **2329.25** | **2329.34** | **-0.08** | **1** | **58** | **9.2e-005** | **1** | **1.225** | **1.837** | **2.057** | **1.006** | **0.922** | **1.756** | **K.ALLAYAFALAGNQDKR.K** 7102 7103 7105 7106 7108 7110 7112 7113 7114 |
|  | 7140 | **587.08** | **2344.29** | **2344.43** | **-0.15** | **0** | **(6)** | **19** | **1** | **---** | **---** | **---** | **---** | **---** | **---** | **K.MVSGFIPLKPTVK.M** |
|  | 7184 | **789.05** | **2364.12** | **2364.25** | **-0.12** | **0** | **77** | **7e-007** | **1** | **0.856** | **1.213** | **1.351** | **0.525** | **0.715** | **1.653** | **R.AFQPFFVELTMPYSVIR.G** 7178 7179 7180 7181 7182 7185 7186 7187 7188 7189 7190 7191 7192 7194 7195 7196 7197 7199 7200 7201 7203 7204 7205 |
|  | 7281 | **794.99** | **2381.94** | **2382.09** | **-0.15** | **0** | **(23)** | **0.025** | **1** | **1.610** | **1.891** | **1.046** | **0.869** | **1.224** | **1.261** | **K.MCPQLQQYEMHGPEGLR.V** |
|  | 7316 | **800.31** | **2397.90** | **2398.08** | **-0.19** | **0** | **43** | **9.2e-005** | **1** | **1.239** | **0.885** | **0.708** | **0.749** | **0.738** | **0.998** | **K.MCPQLQQYEMHGPEGLR.V** 7317 7318 7319 7320 7321 7322 7323 |
|  | 7378 | **805.38** | **2413.12** | **2413.28** | **-0.16** | **0** | **106** | **8.1e-010** | **1** | **1.087** | **0.659** | **1.392** | **0.840** | **0.825** | **1.054** | **K.LHTEAQIQEEGTVVELTGR.Q** 7379 7380 7381 7382 7383 7384 7385 7386 7387 7388 7390 7391 7393 7394 7396 7397 7398 |
|  | 7581 | **818.42** | **2452.24** | **2452.44** | **-0.20** | **0** | **111** | **4.8e-010** | **1** | **1.168** | **1.569** | **1.625** | **0.899** | **0.768** | **0.889** | **R.LLIYAVLPTGDVIGDSAK.Y** 7580 7583 7585 7586 7587 7588 7589 7590 7591 7592 7593 7594 7596 7597 7598 7599 7600 7603 7604 7607 7610 7611 7612 7613 7614 7615 7616 7617 7618 7619 7621 7622 7623 7624 7625 7626 7627 7628 7629 7630 7631 7633 7634 |
|  | 7644 | **819.72** | **2456.13** | **2456.28** | **-0.15** | **0** | **71** | **2.2e-006** | **1** | **###** | **###** | **###** | **###** | **###** | **###** | **K.QFSFPLSSEPFQGSYK.V** 7643 7645 7646 7647 7648 7649 7650 7651 7652 |
|  | 7726 | **620.36** | **2477.41** | **2477.44** | **-0.03** | **0** | **(29)** | **0.087** | **1** | **---** | **---** | **---** | **---** | **---** | **---** | **K.ALLAYAFALAGNQDK.R** |
|  | 7831 | **623.84** | **2491.35** | **2491.45** | **-0.10** | **0** | **73** | **3e-006** | **1** | **0.945** | **0.857** | **1.455** | **0.376** | **0.570** | **1.153** | **R.VSVQLEASPAFLAVPVEK.E** 7770 7771 7772 7773 7774 7775 7776 7777 7778 7780 7782 7783 7785 7787 7788 7789 7790 7791 7792 7793 7794 7797 7798 7799 7800 7802 7803 7804 7805 7807 7808 7809 7810 7811 7812 7813 7814 7817 7818 7819 7820 7821 7822 7823 7824 7826 7827 7828 7829 8174 | **862.02** | **2583.03** | **2583.15** | **-0.13** | **0** | **63** | **2e-006** | **1** | **1.269** | **0.564** | **2.026** | **0.514** | **0.546** | **0.532** | **K.DLTGFPGPLNDQDDEDCINR.H** 8173 |
|  | 8506 | **885.15** | **2652.42** | **2652.50** | **-0.08** | **0** | **(43)** | **0.0031** | **1** | **2.996** | **2.759** | **2.224** | **1.554** | **1.184** | **1.183** | **R.LLLQQVSLPELPGEYSMK.V** 8504 |
|  | 8568 | **890.46** | **2668.36** | **2668.50** | **-0.14** | **0** | **74** | **2.2e-006** | **1** | **0.958** | **1.091** | **1.282** | **0.162** | **0.689** | **0.817** | **R.LLLQQVSLPELPGEYSMK.V** 8556 8557 8558 8559 8560 8561 8562 8563 8564 8565 8566 8567 8569 8570 8571 8572 8574 8575 8576 8577 8578 8579 8580 8582 8583 8584 |
|  | 8581 | **668.11** | **2668.42** | **2668.45** | **-0.03** | **0** | **(14)** | **2.9** | **1** | **---** | **---** | **---** | **---** | **---** | **---** | **R.AFQPFFVELTMPYSVIR.G** |
|  | 8593 | **672.56** | **2686.21** | **2686.29** | **-0.09** | **0** | **(11)** | **1.6** | **1** | **---** | **---** | **---** | **---** | **---** | **---** | **K.MCPQLQQYEMHGPEGLR.V** |
|  | 8637 | **673.89** | **2691.55** | **2691.62** | **-0.07** | **0** | **31** | **0.048** | **1** | **1.537** | **1.861** | **1.580** | **1.277** | **1.270** | **1.554** | **K.DTVIKPLLVEPEGLEK.E** |
|  | 8666 | **676.55** | **2702.17** | **2702.29** | **-0.12** | **0** | **(29)** | **0.013** | **1** | **---** | **---** | **---** | **---** | **---** | **---** | **K.MCPQLQQYEMHGPEGLR.V** 8664 8665 |
|  | 8840 | **690.14** | **2756.52** | **2756.65** | **-0.13** | **0** | **(13)** | **3** | **1** | **---** | **---** | **---** | **---** | **---** | **---** | **R.LLIYAVLPTGDVIGDSAK.Y** 8841 |
|  | 8851 | **691.11** | **2760.41** | **2760.49** | **-0.08** | **0** | **(38)** | **0.01** | **1** | **---** | **---** | **---** | **---** | **---** | **---** | **K.QFSFPLSSEPFQGSYK.V** |
|  | 9618 | **998.81** | **2993.40** | **2993.52** | **-0.12** | **0** | **63** | **1.6e-005** | **1** | **2.814** | **3.837** | **2.475** | **2.141** | **0.883** | **2.065** | **K.ETTFNSLLCPSGGEVSEELSLK.L** 9552 9553 9554 9555 9556 9557 9558 9559 9561 9563 9564 9567 9568 9569 9570 9571 9572 9573 9574 9575 9576 9577 9579 9580 9581 9583 9585 9586 9587 9588 9590 9591 9593 9594 9595 9596 9598 9599 9600 9601 9602 9603 9604 9605 9606 9610 9612 9615 9617 9682 | **749.62** | **2994.45** | **2994.60** | **-0.15** | **0** | **65** | **1.4e-005** | **1** | **0.736** | **0.432** | **0.632** | **0.628** | **-0.013** | **0.762** | **K.QQNAQGGFSSTQDTVVALHALSK.Y** 9679 9683 9685 9686 9687 9690 9696 |
|  | 9809 | **768.87** | **3071.46** | **3071.59** | **-0.14** | **0** | **79** | **3.9e-007** | **1** | **1.085** | **1.252** | **1.094** | **0.662** | **0.614** | **0.689** | **R.SLFTDLEAENDVLHCVAFAVPK.S** 9805 9806 9810 9812 9813 9814 9817 9818 9819 9820 9821 9823 9824 9825 9826 9828 9831 9833 9834 9837 9838 9839 |
|  | 10035 | **1049.13** | **3144.35** | **3144.46** | **-0.10** | **0** | **68** | **1.1e-006** | **1** | **1.182** | **0.803** | **1.382** | **0.613** | **0.560** | **0.834** | **K.VYDYYETDEFAIAEYNAPCSK.D** 10031 10032 10034 10036 10037 10038 10039 10046 10049 |
|  | 10352 | **855.48** | **3417.90** | **3417.85** | **0.05** | **0** | **29** | **0.063** | **1** | **---** | **---** | **---** | **---** | **---** | **---** | **R.VVSMDENFHPLNELIPLVYIQDPK.G** |
|  | 10424 | **863.15** | **3448.57** | **3448.66** | **-0.10** | **0** | **(34)** | **0.0063** | **1** | **---** | **---** | **---** | **---** | **---** | **---** | **K.VYDYYETDEFAIAEYNAPCSK.D** 10426 10429 10430 |
|  | 10425 | **863.15** | **3448.59** | **3448.66** | **-0.07** | **0** | **(8)** | **3.2** | **1** | **---** | **---** | **---** | **---** | **---** | **---** | **K.VYDYYETDEFAIAEYNAPCSK.D** |
|  | 10642 | **935.31** | **3737.20** | **3737.01** | **0.19** | **1** | **11** | **2.1** | **1** | **---** | **---** | **---** | **---** | **---** | **---** | **K.FRVVSMDENFHPLNELIPLVYIQDPK.G** |
|  | 10985 | **1047.27** | **4185.06** | **4185.14** | **-0.08** | **1** | **12** | **2.5** | **1** | **---** | **---** | **---** | **---** | **---** | **---** | **K.ETTFNSLLCPSGGEVSEELSLKLPPNVVEESAR.A** |
|  | 11617 | **1222.23** | **6106.09** | **6106.06** | **0.03** | **1** | **22** | **0.12** | **1** | **---** | **---** | **---** | **---** | **---** | **---** | **R.AVDQSVLLMKPDAELSASSVYNLLPEKDLTGFPGPLNDQDDEDCINR.H** |

  


---

|  |  |
| --- | --- |
| **2.** | P01024    **Mass:** 222951   **Score:** 6152   **Queries matched:** 417   **emPAI:** 1.75 |
|  | Complement C3 OS=Homo sapiens GN=C3 PE=1 SV=2 |

|  |  |  |  |  |  |
| --- | --- | --- | --- | --- | --- |
|  | **Quantitation:** | **Ratio** | **Weighted** | **N** | **SD(geo)** |
|  |  | Patient3-Art/Control | 0.852 | 151 | NN |
|  |  | Patient3-Porta/Control | 0.951 | 153 | NN |
|  |  | Patient3-Hepa/Control | 0.865 | 153 | NN |
|  |  | Patient2-Art/Control | 0.792 | 153 | NN |
|  |  | Patient2-Porta/Control | 0.790 | 150 | NN |
|  |  | **Patient2-Hepa/Control** | **0.949** | **147** | **1.132** |

|  |  |  |  |  |  |  |  |  |  |  |  |  |  |  |  |  |
| --- | --- | --- | --- | --- | --- | --- | --- | --- | --- | --- | --- | --- | --- | --- | --- | --- |
|  | **Query** | **Observed** | **Mr(expt)** | **Mr(calc)** | **Delta** | **Miss** | **Score** | **Expect** | **Rank** | **Patient3-Art/Control** | **Patient3-Porta/Control** | **Patient3-Hepa/Control** | **Patient2-Art/Control** | **Patient2-Porta/Control** | **Patient2-Hepa/Control** | **Peptide** |
|  | 70 | **425.25** | **848.49** | **848.54** | **-0.05** | **0** | **7** | **12** | **1** | **---** | **---** | **---** | **---** | **---** | **---** | **K.TVAVR.T** |
|  | 415 | **479.79** | **957.57** | **957.63** | **-0.06** | **0** | **23** | **0.085** | **1** | **---** | **---** | **---** | **---** | **---** | **---** | **K.LLPVGR.T** 410 411 412 413 414 416 417 418 419 420 421 422 423 424 425 426 428 429 430 431 432 433 |
|  | 462 | **483.72** | **965.43** | **965.49** | **-0.06** | **0** | **12** | **2.7** | **1** | **---** | **---** | **---** | **---** | **---** | **---** | **R.ENPMR.F** 465 466 467 469 470 |
|  | 575 | **495.72** | **989.43** | **989.47** | **-0.04** | **0** | **11** | **2.6** | **1** | **---** | **---** | **---** | **---** | **---** | **---** | **R.FSCQR.R** |
|  | 1086 | **537.30** | **1072.58** | **1072.65** | **-0.07** | **0** | **22** | **0.13** | **1** | **---** | **---** | **---** | **---** | **---** | **---** | **K.VVPEGIR.M** 1083 1084 1085 1087 1088 1092 1093 1094 |
|  | 1504 | **569.32** | **1136.63** | **1136.69** | **-0.05** | **0** | **20** | **0.63** | **2** | **---** | **---** | **---** | **---** | **---** | **---** | **R.LPYSVVR.N** 1496 1498 1499 1500 1501 1503 1505 1506 1507 1508 1509 1511 1517 1518 1519 1520 1521 1522 1523 1524 |
|  | 1934 | **601.34** | **1200.67** | **1200.73** | **-0.06** | **0** | **11** | **4.1** | **1** | **---** | **---** | **---** | **---** | **---** | **---** | **K.FGLEK.R** 1932 1933 1935 |
|  | 1971 | **601.84** | **1201.66** | **1201.68** | **-0.02** | **0** | **24** | **0.17** | **1** | **---** | **---** | **---** | **---** | **---** | **---** | **R.AVLYNYR.Q** 1963 1965 1966 1967 1969 1970 1974 1975 |
|  | 2379 | **644.84** | **1287.66** | **1287.80** | **-0.15** | **0** | **17** | **1.3** | **1** | **---** | **---** | **---** | **---** | **---** | **---** | **K.FLTTAK.D** 2380 |
|  | 2562 | **441.59** | **1321.75** | **1321.79** | **-0.05** | **0** | **4** | **23** | **3** | **---** | **---** | **---** | **---** | **---** | **---** | **K.RPQDAK.N** 2559 |
|  | 2632 | **670.36** | **1338.71** | **1338.80** | **-0.09** | **0** | **24** | **0.25** | **1** | **---** | **---** | **---** | **---** | **---** | **---** | **R.AEDLVGK.S** 2631 2633 2635 |
|  | 2809 | **692.38** | **1382.75** | **1382.86** | **-0.11** | **0** | **13** | **3** | **1** | **---** | **---** | **---** | **---** | **---** | **---** | **K.LVLSSEK.T** |
|  | 2815 | **692.88** | **1383.75** | **1383.87** | **-0.12** | **0** | **31** | **0.049** | **1** | **1.025** | **1.163** | **1.166** | **1.021** | **1.171** | **1.328** | **K.GVFVLNK.K** |
|  | 2818 | **694.35** | **1386.68** | **1386.76** | **-0.07** | **0** | **38** | **0.0099** | **1** | **1.417** | **1.403** | **1.418** | **0.719** | **0.918** | **1.109** | **K.GYTQQLAFR.Q** 2817 2820 2821 2822 2826 2827 2828 |
|  | 2910 | **705.40** | **1408.79** | **1408.89** | **-0.10** | **0** | **25** | **0.2** | **1** | **---** | **---** | **---** | **---** | **---** | **---** | **K.WLILEK.Q** |
|  | 2928 | **707.40** | **1412.79** | **1412.89** | **-0.10** | **0** | **29** | **0.1** | **1** | **---** | **---** | **---** | **---** | **---** | **---** | **R.TFISPIK.C** 2923 2925 2927 2930 2931 |
|  | 2937 | **707.88** | **1413.75** | **1413.82** | **-0.07** | **0** | **52** | **0.00043** | **1** | **0.819** | **0.951** | **0.957** | **0.572** | **0.649** | **0.708** | **K.VLLDGVQNPR.A** 2935 2936 2938 2939 |
|  | 3079 | **725.91** | **1449.80** | **1449.94** | **-0.14** | **0** | **46** | **0.0016** | **1** | **0.977** | **1.213** | **1.064** | **0.776** | **0.911** | **1.244** | **R.VVLVAVDK.G** 3080 3081 |
|  | 3182 | **493.97** | **1478.88** | **1478.93** | **-0.05** | **0** | **25** | **0.21** | **1** | **---** | **---** | **---** | **---** | **---** | **---** | **R.QGALELIK.K** |
|  | 3248 | **498.97** | **1493.88** | **1493.93** | **-0.05** | **0** | **1** | **55** | **1** | **---** | **---** | **---** | **---** | **---** | **---** | **R.ISLPESLK.R** |
|  | 3254 | **748.91** | **1495.80** | **1495.89** | **-0.09** | **0** | **28** | **0.089** | **1** | **---** | **---** | **---** | **---** | **---** | **---** | **K.IWDVVEK.A** 3253 3256 |
|  | 3273 | **751.88** | **1501.74** | **1501.92** | **-0.18** | **0** | **8** | **7.8** | **1** | **---** | **---** | **---** | **---** | **---** | **---** | **K.LMNIFLK.D** |
|  | 3322 | **505.95** | **1514.83** | **1514.85** | **-0.02** | **0** | **30** | **0.082** | **1** | **---** | **---** | **---** | **---** | **---** | **---** | **R.IHWESASLLR.S** |
|  | 3468 | **780.31** | **1558.61** | **1558.78** | **-0.17** | **0** | **14** | **0.36** | **1** | **---** | **---** | **---** | **---** | **---** | **---** | **K.NTMILEICTR.Y** 3471 3473 3475 3477 3481 3492 |
|  | 3840 | **550.99** | **1649.96** | **1650.03** | **-0.07** | **1** | **20** | **0.76** | **1** | **---** | **---** | **---** | **---** | **---** | **---** | **R.ISLPESLKR.I** 3841 3842 3843 |
|  | 3861 | **554.26** | **1659.75** | **1659.91** | **-0.16** | **0** | **50** | **0.00036** | **1** | **1.030** | **0.751** | **1.183** | **0.500** | **0.533** | **1.052** | **K.DSCVGSLVVK.S** |
|  | 4022 | **567.66** | **1699.94** | **1700.03** | **-0.09** | **0** | **40** | **0.0074** | **1** | **0.854** | **0.683** | **1.144** | **0.428** | **0.685** | **1.479** | **R.NTLIIYLDK.V** 4021 4023 |
|  | 4237 | **583.30** | **1746.88** | **1746.94** | **-0.07** | **0** | **27** | **0.11** | **1** | **---** | **---** | **---** | **---** | **---** | **---** | **K.FYYIYNEK.G** |
|  | 4273 | **587.61** | **1759.81** | **1760.01** | **-0.19** | **0** | **40** | **0.0039** | **1** | **0.823** | **0.974** | **0.798** | **0.949** | **0.829** | **1.045** | **R.QPSSAFAAFVK.R** 4274 4275 4276 4277 4278 4279 4280 4281 4282 4283 |
|  | 4349 | **592.33** | **1773.96** | **1773.98** | **-0.02** | **0** | **84** | **2.4e-007** | **1** | **1.273** | **1.438** | **1.845** | **1.362** | **1.535** | **1.546** | **R.IPIEDGSGEVVLSR.K** 4338 4339 4341 4343 4344 4345 4347 4354 |
|  | 4410 | **599.02** | **1794.03** | **1794.19** | **-0.16** | **1** | **12** | **4.1** | **1** | **---** | **---** | **---** | **---** | **---** | **---** | **R.LKGPLLNK.F** 4411 4413 4414 |
|  | 4516 | **605.99** | **1814.96** | **1815.02** | **-0.06** | **0** | **68** | **1.2e-005** | **1** | **0.552** | **1.075** | **1.107** | **0.258** | **1.389** | **0.000** | **R.LVAYYTLIGASGQR.E** 4511 4515 4517 4524 |
|  | 4528 | **606.35** | **1816.03** | **1816.17** | **-0.14** | **1** | **20** | **0.67** | **1** | **---** | **---** | **---** | **---** | **---** | **---** | **K.GVFVLNKK.N** 4530 |
|  | 4595 | **611.65** | **1831.94** | **1832.00** | **-0.06** | **0** | **33** | **0.029** | **1** | **0.540** | **0.393** | **0.954** | **0.682** | **0.681** | **0.981** | **R.YYTYLIMNK.G** 4594 |
|  | 4705 | **616.34** | **1846.00** | **1846.12** | **-0.13** | **1** | **57** | **0.00014** | **1** | **0.799** | **0.808** | **0.687** | **0.924** | **0.808** | **0.790** | **R.KVLLDGVQNPR.A** 4703 4706 4707 4708 4709 4710 4711 4712 |
|  | 4882 | **628.94** | **1883.80** | **1883.89** | **-0.09** | **0** | **32** | **0.0084** | **1** | **1.249** | **0.991** | **1.085** | **0.996** | **0.919** | **1.089** | **R.CAEENCFIQK.S** 4881 4883 4884 4886 |
|  | 4946 | **633.28** | **1896.81** | **1896.96** | **-0.14** | **0** | **51** | **0.00014** | **1** | **1.084** | **1.179** | **1.316** | **0.730** | **0.908** | **1.000** | **K.ACEPGVDYVYK.T** 4947 4948 4949 4950 4951 4952 4953 4955 4956 |
|  | 5045 | **644.33** | **1929.98** | **1930.08** | **-0.10** | **1** | **73** | **3.1e-006** | **1** | **0.955** | **0.942** | **0.836** | **0.680** | **0.778** | **1.135** | **K.RIPIEDGSGEVVLSR.K** 5046 5049 5052 5055 5058 |
|  | 5178 | **652.01** | **1953.01** | **1953.10** | **-0.09** | **0** | **40** | **0.0061** | **1** | **0.562** | **0.746** | **0.657** | **0.408** | **0.291** | **1.239** | **R.EVVADSVWVDVK.D** 5174 5175 5176 5179 5181 5193 5195 5197 5198 |
|  | 5386 | **668.99** | **2003.95** | **2003.99** | **-0.04** | **0** | **47** | **0.00091** | **1** | **0.626** | **0.177** | **0.887** | **0.542** | **0.532** | **1.186** | **K.VSHSEDDCLAFK.V** |
|  | 5417 | **1005.58** | **2009.15** | **2009.24** | **-0.09** | **0** | **47** | **0.0014** | **1** | **0.789** | **0.867** | **0.899** | **0.784** | **0.757** | **0.916** | **K.SSLSVPYVIVPLK.T** 5413 5414 5415 5418 5419 5420 |
|  | 5621 | **691.08** | **2070.21** | **2070.21** | **0.00** | **1** | **12** | **4.1** | **1** | **---** | **---** | **---** | **---** | **---** | **---** | **R.YISKYELDK.A** 5623 |
|  | 5885 | **707.65** | **2119.92** | **2120.09** | **-0.17** | **0** | **109** | **2.5e-010** | **1** | **1.112** | **1.104** | **1.198** | **0.937** | **0.830** | **0.982** | **R.SNLDEDIIAEENIVSR.S** 5886 5887 5888 5889 5890 5891 5893 5896 5897 5898 5899 5900 |
|  | 6338 | **726.07** | **2175.18** | **2175.23** | **-0.05** | **0** | **15** | **2.1** | **1** | **---** | **---** | **---** | **---** | **---** | **---** | **R.TELRPGETLNVNFLLR.M** 6300 6305 6307 6312 6315 6316 6317 6318 6327 6339 6349 6353 6354 |
|  | 6803 | **755.39** | **2263.14** | **2263.27** | **-0.13** | **0** | **25** | **0.17** | **1** | **---** | **---** | **---** | **---** | **---** | **---** | **R.TVMVNIENPEGIPVK.Q** 6802 6804 |
|  | 7292 | **796.39** | **2386.14** | **2386.23** | **-0.09** | **0** | **61** | **3.3e-005** | **1** | **0.977** | **1.122** | **1.087** | **0.602** | **0.654** | **0.885** | **K.DICEEQVNSLPGSITK.A** 7289 7290 7291 7293 7294 |
|  | 7311 | **800.06** | **2397.16** | **2397.30** | **-0.14** | **0** | **56** | **0.0001** | **1** | **0.871** | **0.888** | **1.113** | **0.865** | **1.003** | **0.855** | **R.VELLHNPAFCSLATTK.R** 7312 7313 7314 |
|  | 7352 | **601.83** | **2403.28** | **2403.37** | **-0.09** | **0** | **(11)** | **4.7** | **1** | **---** | **---** | **---** | **---** | **---** | **---** | **K.GQGTLSVVTMYHAK.A** |
|  | 7400 | **605.84** | **2419.32** | **2419.37** | **-0.04** | **0** | **13** | **3.3** | **1** | **---** | **---** | **---** | **---** | **---** | **---** | **K.GQGTLSVVTMYHAK.A** |
|  | 7497 | **814.68** | **2441.02** | **2441.05** | **-0.03** | **0** | **(1)** | **6.3** | **1** | **---** | **---** | **---** | **---** | **---** | **---** | **K.QCQDLGAFTESMVVFGCPN.-** |
|  | 7502 | **613.34** | **2449.34** | **2449.39** | **-0.05** | **0** | **52** | **0.00037** | **1** | **0.645** | **0.430** | **1.070** | **0.511** | **0.616** | **0.951** | **K.VHQYFNVELIQPGAVK.V** 7503 |
|  | 7505 | **817.73** | **2450.18** | **2450.27** | **-0.09** | **0** | **50** | **0.0004** | **1** | **1.000** | **0.479** | **1.319** | **1.029** | **1.021** | **1.106** | **K.DAPDHQELNLDVSLQLPSR.S** 7508 7517 7519 |
|  | 7655 | **820.00** | **2456.98** | **2457.04** | **-0.06** | **0** | **10** | **0.36** | **1** | **---** | **---** | **---** | **---** | **---** | **---** | **K.QCQDLGAFTESMVVFGCPN.-** 7656 7657 |
|  | 7667 | **821.07** | **2460.18** | **2460.28** | **-0.10** | **0** | **(103)** | **2.2e-009** | **1** | **0.984** | **1.025** | **0.419** | **1.020** | **0.502** | **0.369** | **R.ILLQGTPVAQMTEDAVDAER.L** 7665 7666 7668 7669 7670 7671 7672 7673 7674 7675 7676 |
|  | 7716 | **826.39** | **2476.14** | **2476.28** | **-0.14** | **0** | **111** | **2.3e-010** | **1** | **0.511** | **0.774** | **0.332** | **0.536** | **0.587** | **0.653** | **R.ILLQGTPVAQMTEDAVDAER.L** 7712 7713 7714 7715 7717 7718 7719 7720 7721 7724 |
|  | 7735 | **829.74** | **2486.18** | **2486.38** | **-0.19** | **0** | **60** | **4.1e-005** | **1** | **1.063** | **1.267** | **1.356** | **1.036** | **1.174** | **1.623** | **K.EYVLPSFEVIVEPTEK.F** 7736 7737 7738 7739 7741 |
|  | 8077 | **633.60** | **2530.35** | **2530.45** | **-0.10** | **2** | **4** | **22** | **1** | **---** | **---** | **---** | **---** | **---** | **---** | **R.TKKQELSEAEQATR.T** |
|  | 8399 | **868.15** | **2601.44** | **2601.44** | **-0.00** | **1** | **42** | **0.0038** | **1** | **0.698** | **0.746** | **0.801** | **0.625** | **0.770** | **0.719** | **K.KVEGTAFVIFGIQDGEQR.I** 8384 8385 8386 8389 8392 8393 8394 8396 8398 8400 8401 8402 8403 |
|  | 8505 | **664.11** | **2652.42** | **2652.47** | **-0.05** | **1** | **12** | **4.1** | **1** | **---** | **---** | **---** | **---** | **---** | **---** | **K.VRVELLHNPAFCSLATTK.R** |
|  | 8808 | **916.80** | **2747.38** | **2747.51** | **-0.13** | **0** | **84** | **1.8e-007** | **1** | **0.674** | **0.742** | **0.585** | **0.276** | **0.133** | **0.712** | **R.EPGQDLVVLPLSITTDFIPSFR.L** 8800 8801 8802 8803 8804 8805 8806 8807 8809 8810 8811 8812 8813 8814 8815 8816 8817 8818 8819 8820 8821 8822 8823 8825 8826 8827 8828 8829 8830 8832 8833 8834 |
|  | 8878 | **692.85** | **2767.38** | **2767.46** | **-0.08** | **1** | **38** | **0.008** | **1** | **0.628** | **1.268** | **0.557** | **0.715** | **0.331** | **1.202** | **R.SEETKENEGFTVTAEGK.G** 8868 8873 8874 8876 8877 8879 8881 8882 8883 8884 8886 8887 |
|  | 8894 | **925.43** | **2773.26** | **2773.41** | **-0.15** | **0** | **(19)** | **0.25** | **1** | **---** | **---** | **---** | **---** | **---** | **---** | **R.AYYENSPQQVFSTEFEVK.E** |
|  | 8976 | **933.44** | **2797.29** | **2797.35** | **-0.06** | **0** | **50** | **0.00025** | **1** | **---** | **---** | **---** | **---** | **---** | **---** | **K.DYAGVFSDAGLTFTSSSGQQTAQR.A** 8977 8979 |
|  | 9021 | **936.16** | **2805.45** | **2805.53** | **-0.09** | **0** | **80** | **5.7e-007** | **1** | **0.675** | **0.919** | **0.961** | **0.900** | **0.933** | **0.902** | **R.VPVAVQGEDTVQSLTQGDGVAK.L** 9014 9015 9016 9017 9018 9019 9020 9022 9023 9024 9025 |
|  | 9122 | **713.88** | **2851.50** | **2851.58** | **-0.07** | **1** | **26** | **0.15** | **1** | **---** | **---** | **---** | **---** | **---** | **---** | **K.DSITTWEILAVSMSDKK.G** |
|  | 9191 | **955.81** | **2864.42** | **2864.51** | **-0.09** | **0** | **(66)** | **1.2e-005** | **1** | **2.092** | **2.401** | **0.910** | **1.841** | **1.186** | **0.531** | **K.VQLSNDFDEYIMAIEQTIK.S** 9187 9190 9192 9193 |
|  | 9260 | **961.15** | **2880.43** | **2880.50** | **-0.07** | **0** | **82** | **3e-007** | **1** | **0.630** | **0.765** | **0.761** | **0.698** | **0.874** | **1.024** | **K.VQLSNDFDEYIMAIEQTIK.S** 9237 9238 9239 9241 9242 9243 9244 9245 9247 9248 9249 9250 9252 9253 9254 9255 9257 9258 9259 9261 9262 9263 9265 9266 |
|  | 9864 | **770.36** | **3077.42** | **3077.61** | **-0.19** | **0** | **44** | **0.00084** | **1** | **---** | **---** | **---** | **---** | **---** | **---** | **R.AYYENSPQQVFSTEFEVK.E** |
|  | 10014 | **1044.57** | **3130.69** | **3130.73** | **-0.05** | **1** | **12** | **4.2** | **1** | **---** | **---** | **---** | **---** | **---** | **---** | **R.QVREPGQDLVVLPLSITTDFIPSFR.L** |
|  | 10211 | **797.17** | **3184.64** | **3184.71** | **-0.07** | **0** | **(4)** | **23** | **1** | **---** | **---** | **---** | **---** | **---** | **---** | **K.VQLSNDFDEYIMAIEQTIK.S** |
|  | 10214 | **797.93** | **3187.68** | **3187.69** | **-0.01** | **0** | **8** | **8.8** | **1** | **---** | **---** | **---** | **---** | **---** | **---** | **K.QKPDGVFQEDAPVIHQEMIGGLR.N** |
|  | 10283 | **844.14** | **3372.54** | **3372.71** | **-0.17** | **0** | **(44)** | **0.00084** | **1** | **1.728** | **0.949** | **0.168** | **0.654** | **1.496** | **0.591** | **K.YFKPGMPFDLMVFVTNPDGSPAYR.V** 10284 |
|  | 10328 | **848.14** | **3388.52** | **3388.71** | **-0.19** | **0** | **48** | **0.00023** | **1** | **0.547** | **1.366** | **0.667** | **1.030** | **1.254** | **0.739** | **K.YFKPGMPFDLMVFVTNPDGSPAYR.V** 10329 |
|  | 10480 | **702.15** | **3505.74** | **3505.91** | **-0.17** | **0** | **4** | **19** | **1** | **---** | **---** | **---** | **---** | **---** | **---** | **R.TMQALPYSTVGNSNNYLHLSVLR.T** 10482 |
|  | 10807 | **977.48** | **3905.88** | **3906.04** | **-0.16** | **0** | **18** | **0.48** | **1** | **---** | **---** | **---** | **---** | **---** | **---** | **K.QDSLSSQNQLGVLPLSWDIPELVNMGQWK.I** 10806 |
|  | 10961 | **1034.47** | **4133.85** | **4133.99** | **-0.14** | **1** | **2** | **6.3** | **1** | **---** | **---** | **---** | **---** | **---** | **---** | **K.ADIGCTPGSGKDYAGVFSDAGLTFTSSSGQQTAQR.A** |
|  | 10970 | **830.27** | **4146.32** | **4146.27** | **0.05** | **2** | **15** | **1** | **1** | **---** | **---** | **---** | **---** | **---** | **---** | **R.SEFPESWLWNVEDLKEPPKNGISTK.L** |

  


---

|  |  |
| --- | --- |
| **3.** | P02671    **Mass:** 108897   **Score:** 4152   **Queries matched:** 230   **emPAI:** 1.70 |
|  | Fibrinogen alpha chain OS=Homo sapiens GN=FGA PE=1 SV=2 |

|  |  |  |  |  |  |
| --- | --- | --- | --- | --- | --- |
|  | **Quantitation:** | **Ratio** | **Weighted** | **N** | **SD(geo)** |
|  |  | Patient3-Art/Control | 0.905 | 85 | NN |
|  |  | Patient3-Porta/Control | 0.916 | 87 | NN |
|  |  | Patient3-Hepa/Control | 0.729 | 83 | NN |
|  |  | Patient2-Art/Control | 0.929 | 84 | NN |
|  |  | Patient2-Porta/Control | 0.925 | 86 | NN |
|  |  | Patient2-Hepa/Control | 0.910 | 83 | NN |

|  |  |  |  |  |  |  |  |  |  |  |  |  |  |  |  |  |
| --- | --- | --- | --- | --- | --- | --- | --- | --- | --- | --- | --- | --- | --- | --- | --- | --- |
|  | **Query** | **Observed** | **Mr(expt)** | **Mr(calc)** | **Delta** | **Miss** | **Score** | **Expect** | **Rank** | **Patient3-Art/Control** | **Patient3-Porta/Control** | **Patient3-Hepa/Control** | **Patient2-Art/Control** | **Patient2-Porta/Control** | **Patient2-Hepa/Control** | **Peptide** |
|  | 673 | **502.78** | **1003.55** | **1003.60** | **-0.04** | **0** | **25** | **0.099** | **1** | **---** | **---** | **---** | **---** | **---** | **---** | **K.DLLPSR.D** 667 668 669 670 671 672 674 675 |
|  | 772 | **509.70** | **1017.38** | **1017.42** | **-0.03** | **0** | **3** | **8.6** | **1** | **---** | **---** | **---** | **---** | **---** | **---** | **K.CPSGCR.M** |
|  | 809 | **511.76** | **1021.51** | **1021.57** | **-0.07** | **0** | **31** | **0.032** | **1** | **0.619** | **0.828** | **0.397** | **0.855** | **1.009** | **0.750** | **R.VSEDLR.S** |
|  | 1642 | **578.33** | **1154.64** | **1154.75** | **-0.11** | **0** | **9** | **10** | **2** | **---** | **---** | **---** | **---** | **---** | **---** | **K.LVTSK.G** 1635 1637 1643 |
|  | 2052 | **605.36** | **1208.71** | **1208.80** | **-0.09** | **0** | **20** | **0.6** | **1** | **---** | **---** | **---** | **---** | **---** | **---** | **R.IEVLK.R** 2049 2050 2051 2053 2054 2055 2057 |
|  | 2290 | **636.23** | **1270.45** | **1270.62** | **-0.17** | **0** | **24** | **0.021** | **1** | **1.002** | **1.118** | **0.675** | **0.878** | **0.838** | **1.050** | **R.GDFSSANNR.D** 2289 |
|  | 2485 | **657.84** | **1313.67** | **1313.71** | **-0.04** | **0** | **18** | **0.7** | **1** | **---** | **---** | **---** | **---** | **---** | **---** | **K.VTSGSTTTTR.R** 2482 2483 2484 2486 |
|  | 2715 | **682.38** | **1362.74** | **1362.81** | **-0.07** | **0** | **22** | **0.28** | **1** | **---** | **---** | **---** | **---** | **---** | **---** | **K.VPPEWK.A** 2712 2713 2714 2716 2721 2722 |
|  | 2729 | **455.96** | **1364.86** | **1364.90** | **-0.03** | **1** | **14** | **2.3** | **1** | **---** | **---** | **---** | **---** | **---** | **---** | **R.IEVLKR.K** 2726 2728 |
|  | 2851 | **699.79** | **1397.57** | **1397.69** | **-0.12** | **0** | **1** | **15** | **1** | **---** | **---** | **---** | **---** | **---** | **---** | **K.ALTDMPQMR.M** |
|  | 2920 | **706.89** | **1411.76** | **1411.83** | **-0.07** | **0** | **31** | **0.06** | **1** | **---** | **---** | **---** | **---** | **---** | **---** | **R.AQLVDMK.R** |
|  | 3005 | **714.86** | **1427.70** | **1427.83** | **-0.13** | **0** | **(17)** | **1.1** | **1** | **---** | **---** | **---** | **---** | **---** | **---** | **R.AQLVDMK.R** |
|  | 3134 | **486.28** | **1455.83** | **1455.94** | **-0.11** | **0** | **13** | **5.4** | **1** | **---** | **---** | **---** | **---** | **---** | **---** | **R.QHLPLIK.M** 3135 |
|  | 3246 | **747.84** | **1493.67** | **1493.74** | **-0.07** | **0** | **20** | **0.34** | **1** | **---** | **---** | **---** | **---** | **---** | **---** | **K.QFTSSTSYNR.G** |
|  | 3382 | **768.93** | **1535.85** | **1535.95** | **-0.10** | **0** | **41** | **0.0057** | **1** | **0.829** | **0.962** | **0.684** | **0.953** | **0.924** | **0.793** | **K.QLEQVIAK.D** 3377 3378 3380 3381 3385 3386 3387 3388 3389 3390 3391 |
|  | 3748 | **546.28** | **1635.83** | **1635.91** | **-0.08** | **0** | **32** | **0.04** | **1** | **0.808** | **1.027** | **0.704** | **0.902** | **0.815** | **0.803** | **K.NSLFEYQK.N** 3740 3741 3742 3743 3744 3745 3746 3747 3749 3751 |
|  | 4028 | **570.32** | **1707.93** | **1708.03** | **-0.11** | **1** | **37** | **0.014** | **1** | **1.106** | **1.964** | **1.055** | **1.295** | **1.048** | **2.230** | **K.RLEVDIDIK.I** 4030 4031 4032 4033 4034 4036 4037 4038 4039 4040 4041 4042 4044 4045 4048 4049 4050 4055 4056 4057 4058 4059 4062 4063 4065 4066 4067 4069 4070 4072 4073 4074 4076 4078 4081 4082 4083 4084 4089 4092 4093 |
|  | 4139 | **572.32** | **1713.93** | **1714.07** | **-0.14** | **0** | **38** | **0.012** | **1** | **0.767** | **0.284** | **0.688** | **0.661** | **0.765** | **0.954** | **K.VQHIQLLQK.N** |
|  | 4240 | **583.64** | **1747.90** | **1747.96** | **-0.06** | **0** | **7** | **12** | **1** | **---** | **---** | **---** | **---** | **---** | **---** | **R.GSESGIFTNTK.E** |
|  | 4572 | **608.95** | **1823.81** | **1823.93** | **-0.12** | **0** | **90** | **2.2e-008** | **1** | **1.759** | **2.161** | **1.058** | **1.604** | **1.568** | **1.784** | **K.GLIDEVNQDFTNR.I** 4554 4555 4556 4557 4558 4559 4560 4561 4563 4565 4566 4567 4568 4569 4570 4571 4573 4575 4576 4577 4578 4579 4580 4581 4583 4585 4586 4588 4589 4590 |
|  | 5062 | **645.32** | **1932.95** | **1933.02** | **-0.08** | **0** | **(3)** | **25** | **2** | **---** | **---** | **---** | **---** | **---** | **---** | **K.DSHSLTTNIMEILR.G** |
|  | 5146 | **650.66** | **1948.95** | **1949.02** | **-0.07** | **0** | **42** | **0.0035** | **1** | **1.089** | **1.014** | **1.008** | **1.100** | **1.175** | **1.256** | **K.DSHSLTTNIMEILR.G** 5145 |
|  | 6480 | **734.70** | **2201.09** | **2201.12** | **-0.03** | **0** | **57** | **0.0001** | **1** | **0.896** | **0.992** | **0.691** | **0.888** | **1.004** | **1.025** | **R.HPDEAAFFDTASTGK.T** 6481 |
|  | 7142 | **589.36** | **2353.40** | **2353.40** | **-0.00** | **0** | **(24)** | **0.24** | **1** | **---** | **---** | **---** | **---** | **---** | **---** | **K.MKPVPDLVPGNFK.S** |
|  | 7221 | **790.74** | **2369.20** | **2369.39** | **-0.19** | **0** | **35** | **0.017** | **1** | **0.737** | **0.852** | **0.724** | **0.996** | **1.121** | **0.949** | **K.MKPVPDLVPGNFK.S** 7220 7222 7223 7228 7231 7232 7233 7234 |
|  | 8111 | **854.32** | **2559.95** | **2560.11** | **-0.17** | **0** | **50** | **1.3e-005** | **1** | **1.385** | **0.384** | **0.869** | **1.200** | **1.013** | **0.920** | **K.DSDWPFCSDEDWNYK.C** 8112 8113 8114 8115 8116 8117 |
|  | 8140 | **857.05** | **2568.11** | **2568.25** | **-0.14** | **0** | **(99)** | **1.7e-009** | **1** | **1.123** | **1.626** | **0.455** | **1.821** | **0.817** | **1.062** | **K.TFPGFFSPMLGEFVSETESR.G** 8138 8142 |
|  | 8178 | **862.37** | **2584.08** | **2584.25** | **-0.17** | **0** | **107** | **1.4e-010** | **1** | **1.565** | **1.431** | **1.058** | **1.082** | **1.061** | **1.936** | **K.TFPGFFSPMLGEFVSETESR.G** 8176 8177 8179 8181 8182 8183 8184 8185 8186 8187 8188 8189 8190 8191 8192 8193 8194 8195 8196 8197 8198 8200 8201 8202 8203 8204 8205 8206 |
|  | 8230 | **649.34** | **2593.34** | **2593.41** | **-0.07** | **1** | **(60)** | **6.8e-005** | **1** | **1.685** | **1.290** | **0.946** | **1.671** | **1.053** | **0.730** | **K.NNKDSHSLTTNIMEILR.G** 8233 |
|  | 8434 | **653.32** | **2609.23** | **2609.41** | **-0.17** | **1** | **61** | **2.4e-005** | **1** | **0.794** | **0.785** | **0.625** | **0.902** | **0.923** | **0.777** | **K.NNKDSHSLTTNIMEILR.G** 8435 8436 8439 8440 |
|  | 10356 | **1141.16** | **3420.44** | **3420.57** | **-0.12** | **0** | **(64)** | **1.5e-006** | **1** | **2.883** | **1.558** | **-0.213** | **2.221** | **0.651** | **1.899** | **K.EVVTSEDGSDCPEAMDLGTLSGIGTLDGFR.H** 10355 10357 10358 10359 10363 |
|  | 10388 | **1146.47** | **3436.39** | **3436.56** | **-0.17** | **0** | **115** | **6.5e-012** | **1** | **1.296** | **0.771** | **0.553** | **-0.082** | **1.047** | **0.000** | **K.EVVTSEDGSDCPEAMDLGTLSGIGTLDGFR.H** 10385 10386 10387 10389 10390 10391 10392 10393 10395 10396 10397 10398 10399 10401 10402 10403 10404 10405 |

  


---

|  |  |
| --- | --- |
| **4.** | P04114    **Mass:** 625296   **Score:** 2672   **Queries matched:** 201   **emPAI:** 0.31 |
|  | Apolipoprotein B-100 OS=Homo sapiens GN=APOB PE=1 SV=1 |

|  |  |  |  |  |  |
| --- | --- | --- | --- | --- | --- |
|  | **Quantitation:** | **Ratio** | **Weighted** | **N** | **SD(geo)** |
|  |  | Patient3-Art/Control | 1.187 | 80 | NN |
|  |  | Patient3-Porta/Control | 1.367 | 81 | NN |
|  |  | Patient3-Hepa/Control | 1.334 | 79 | NN |
|  |  | Patient2-Art/Control | 0.859 | 79 | NN |
|  |  | Patient2-Porta/Control | 0.812 | 77 | NN |
|  |  | **Patient2-Hepa/Control** | **0.984** | **77** | **1.163** |

|  |  |  |  |  |  |  |  |  |  |  |  |  |  |  |  |  |
| --- | --- | --- | --- | --- | --- | --- | --- | --- | --- | --- | --- | --- | --- | --- | --- | --- |
|  | **Query** | **Observed** | **Mr(expt)** | **Mr(calc)** | **Delta** | **Miss** | **Score** | **Expect** | **Rank** | **Patient3-Art/Control** | **Patient3-Porta/Control** | **Patient3-Hepa/Control** | **Patient2-Art/Control** | **Patient2-Porta/Control** | **Patient2-Hepa/Control** | **Peptide** |
|  | 856 | **517.83** | **1033.64** | **1033.64** | **-0.00** | **0** | **18** | **0.55** | **1** | **---** | **---** | **---** | **---** | **---** | **---** | **K.LVTELR.G** 852 853 854 855 857 |
|  | 916 | **523.81** | **1045.61** | **1045.66** | **-0.04** | **0** | **30** | **0.046** | **1** | **0.739** | **1.092** | **0.167** | **0.734** | **0.219** | **0.000** | **K.AAIQALR.K** 915 917 |
|  | 1117 | **539.30** | **1076.58** | **1076.67** | **-0.08** | **0** | **27** | **0.085** | **1** | **---** | **---** | **---** | **---** | **---** | **---** | **K.LLLMGAR.T** 1118 |
|  | 1239 | **547.34** | **1092.66** | **1092.66** | **-0.00** | **0** | **(21)** | **0.39** | **2** | **---** | **---** | **---** | **---** | **---** | **---** | **K.LLLMGAR.T** 1230 1231 1232 1233 1234 1235 1237 1238 1240 1241 1243 |
|  | 1664 | **578.76** | **1155.51** | **1155.53** | **-0.02** | **0** | **15** | **1.2** | **1** | **---** | **---** | **---** | **---** | **---** | **---** | **R.DLGQCDR.F** |
|  | 1700 | **583.32** | **1164.62** | **1164.68** | **-0.06** | **0** | **21** | **0.34** | **1** | **---** | **---** | **---** | **---** | **---** | **---** | **R.ITLPDFR.L** 1701 |
|  | 2142 | **619.90** | **1237.79** | **1237.82** | **-0.03** | **0** | **13** | **3.6** | **1** | **---** | **---** | **---** | **---** | **---** | **---** | **K.VIGTLK.N** |
|  | 2221 | **627.89** | **1253.78** | **1253.82** | **-0.04** | **0** | **26** | **0.15** | **1** | **---** | **---** | **---** | **---** | **---** | **---** | **K.LTALTK.K** 2222 2223 |
|  | 2644 | **672.40** | **1342.78** | **1342.84** | **-0.06** | **0** | **63** | **9.7e-005** | **1** | **1.512** | **1.350** | **1.344** | **0.921** | **0.736** | **0.666** | **K.LAPGELTIIL.-** 2643 2645 2647 2648 |
|  | 2731 | **684.41** | **1366.81** | **1366.86** | **-0.06** | **0** | **28** | **0.11** | **1** | **---** | **---** | **---** | **---** | **---** | **---** | **R.ALVDTLK.F** 2734 |
|  | 2854 | **467.21** | **1398.62** | **1398.71** | **-0.09** | **0** | **6** | **8** | **2** | **---** | **---** | **---** | **---** | **---** | **---** | **R.VPETDMTFR.H** |
|  | 2911 | **705.41** | **1408.80** | **1408.89** | **-0.09** | **0** | **7** | **13** | **1** | **---** | **---** | **---** | **---** | **---** | **---** | **K.FIIPSPK.R** |
|  | 3045 | **482.59** | **1444.76** | **1444.81** | **-0.05** | **0** | **33** | **0.041** | **1** | **1.104** | **0.933** | **0.857** | **0.730** | **0.768** | **0.843** | **K.HINIDQFVR.K** |
|  | 3147 | **487.59** | **1459.74** | **1459.81** | **-0.07** | **0** | **49** | **0.00082** | **1** | **1.309** | **1.866** | **1.694** | **1.409** | **0.783** | **2.075** | **K.SPAFTDLHLR.Y** 3148 3149 3150 |
|  | 3673 | **540.96** | **1619.86** | **1620.04** | **-0.18** | **0** | **50** | **0.00064** | **1** | **1.767** | **2.676** | **2.634** | **0.578** | **1.612** | **1.481** | **R.TGISPLALIK.G** 3675 |
|  | 3847 | **551.99** | **1652.93** | **1653.01** | **-0.07** | **0** | **20** | **0.61** | **1** | **---** | **---** | **---** | **---** | **---** | **---** | **R.IPSVQINFK.D** 3848 |
|  | 3855 | **552.65** | **1654.93** | **1654.98** | **-0.04** | **0** | **25** | **0.2** | **1** | **---** | **---** | **---** | **---** | **---** | **---** | **K.FPEVDVLTK.Y** 3856 |
|  | 3970 | **560.33** | **1677.95** | **1678.03** | **-0.07** | **0** | **35** | **0.021** | **1** | **1.705** | **1.430** | **2.322** | **1.164** | **1.021** | **1.141** | **K.IEIPLPFGGK.S** 3969 |
|  | 4238 | **583.30** | **1746.89** | **1746.94** | **-0.05** | **0** | **23** | **0.27** | **1** | **---** | **---** | **---** | **---** | **---** | **---** | **K.EVYGFNPEGK.A** |
|  | 4385 | **596.33** | **1785.97** | **1786.02** | **-0.06** | **0** | **39** | **0.0082** | **1** | **0.944** | **1.283** | **1.273** | **0.983** | **0.703** | **0.964** | **K.VLVDHFGYTK.D** |
|  | 4825 | **625.70** | **1874.06** | **1874.06** | **0.00** | **0** | **22** | **0.4** | **1** | **---** | **---** | **---** | **---** | **---** | **---** | **R.TLQGIPQMIGEVIR.K** 4826 4827 |
|  | 4846 | **626.36** | **1876.06** | **1876.12** | **-0.06** | **1** | **23** | **0.39** | **1** | **---** | **---** | **---** | **---** | **---** | **---** | **R.DLKVEDIPLAR.I** 4842 4849 4850 4851 4852 |
|  | 4857 | **627.34** | **1878.99** | **1879.09** | **-0.10** | **0** | **56** | **0.00015** | **1** | **0.929** | **1.226** | **1.176** | **0.477** | **0.573** | **0.545** | **K.SVSLPSLDPASAK.I** 4856 4858 4859 |
|  | 4879 | **628.71** | **1883.11** | **1883.12** | **-0.01** | **0** | **23** | **0.31** | **1** | **---** | **---** | **---** | **---** | **---** | **---** | **K.LIVAMSSWLQK.A** |
|  | 4909 | **629.31** | **1884.90** | **1884.99** | **-0.09** | **0** | **49** | **0.00055** | **1** | **2.569** | **2.275** | **2.229** | **0.986** | **1.377** | **0.918** | **K.AVSMPSFSILGSDVR.V** 4910 4912 4913 4914 |
|  | 5000 | **639.01** | **1914.00** | **1914.11** | **-0.11** | **0** | **32** | **0.041** | **1** | **3.103** | **3.737** | **2.978** | **0.559** | **1.730** | **1.337** | **R.EFQVPTFTIPK.L** |
|  | 5007 | **639.67** | **1915.97** | **1916.09** | **-0.11** | **0** | **61** | **4.6e-005** | **1** | **1.386** | **1.383** | **1.702** | **1.200** | **1.005** | **0.923** | **K.GFEPTLEALFGK.Q** 5004 5005 5006 5008 5009 |
|  | 5215 | **655.02** | **1962.05** | **1962.11** | **-0.06** | **0** | **18** | **0.98** | **1** | **---** | **---** | **---** | **---** | **---** | **---** | **K.YGMVAQVTQTLK.L** 5214 |
|  | 5315 | **665.67** | **1994.00** | **1994.19** | **-0.19** | **0** | **56** | **0.00014** | **1** | **1.977** | **1.785** | **1.635** | **1.353** | **1.424** | **1.034** | **K.IAELSATAQEIIK.S** 5326 5327 5329 5330 5332 5333 5339 5345 5346 |
|  | 5395 | **670.04** | **2007.11** | **2007.21** | **-0.10** | **0** | **57** | **0.00012** | **1** | **1.806** | **1.702** | **2.518** | **1.293** | **0.831** | **1.510** | **R.TLADLTLLDSPIK.V** 5394 |
|  | 5487 | **680.36** | **2038.06** | **2038.19** | **-0.13** | **0** | **68** | **1.1e-005** | **1** | **0.319** | **1.095** | **0.736** | **0.102** | **0.414** | **0.354** | **K.ALVEQGFTVPEIK.T** 5484 5486 5488 5489 5490 5491 |
|  | 5959 | **713.39** | **2137.15** | **2137.17** | **-0.02** | **0** | **70** | **6.4e-006** | **1** | **2.287** | **1.823** | **1.764** | **2.782** | **0.294** | **2.667** | **K.ATFQTPDFIVPLTDLR.I** 5950 5952 5953 5955 5957 5958 5960 |
|  | 6147 | **723.04** | **2166.09** | **2166.20** | **-0.11** | **0** | **56** | **0.00014** | **1** | **###** | **###** | **###** | **###** | **###** | **###** | **R.ITENDIQIALDDAK.I** 6148 6149 6151 6152 |
|  | 6375 | **726.73** | **2177.15** | **2177.25** | **-0.10** | **0** | **72** | **4.4e-006** | **1** | **0.842** | **1.199** | **1.057** | **1.399** | **1.186** | **1.164** | **K.FSVPAGIVIPSFQALTAR.F** 6373 6374 6376 6377 6379 6380 6381 6382 6385 6386 6388 6391 6395 |
|  | 6522 | **737.39** | **2209.14** | **2209.26** | **-0.12** | **0** | **28** | **0.11** | **1** | **---** | **---** | **---** | **---** | **---** | **---** | **K.VSALLTPAEQTGTWK.L** |
|  | 6697 | **742.42** | **2224.24** | **2224.29** | **-0.06** | **0** | **30** | **0.071** | **1** | **---** | **---** | **---** | **---** | **---** | **---** | **R.TSSFALNLPTLPEVK.F** 6692 6694 6696 |
|  | 6719 | **746.70** | **2237.09** | **2237.15** | **-0.06** | **0** | **32** | **0.029** | **1** | **1.023** | **0.965** | **1.147** | **0.557** | **1.097** | **0.843** | **K.MTSNFPVDLSDYPK.S** 6720 |
|  | 6805 | **756.05** | **2265.14** | **2265.28** | **-0.14** | **0** | **65** | **1.7e-005** | **1** | **###** | **###** | **###** | **###** | **###** | **###** | **K.SVSDGIAALDLNAVANK.I** 6807 6808 |
|  | 6812 | **759.08** | **2274.22** | **2274.33** | **-0.11** | **0** | **63** | **4.1e-005** | **1** | **0.750** | **1.452** | **1.230** | **1.188** | **0.175** | **0.821** | **R.GIISALLVPPETEEAK.Q** 6810 6811 6813 6814 6815 6816 |
|  | 6963 | **772.07** | **2313.20** | **2313.27** | **-0.07** | **0** | **57** | **0.00011** | **1** | **1.332** | **1.713** | **1.546** | **0.976** | **0.961** | **1.206** | **R.NIQEYLSILTDPDGK.G** 6965 6966 6967 |
|  | 7143 | **785.72** | **2354.14** | **2354.31** | **-0.17** | **0** | **38** | **0.0083** | **1** | **1.200** | **1.387** | **1.557** | **1.208** | **0.754** | **0.804** | **K.IEGNLIFDPNNYLPK.E** 7144 7145 7146 7147 |
|  | 7154 | **786.11** | **2355.29** | **2355.34** | **-0.05** | **0** | **93** | **3e-008** | **1** | **0.396** | **0.933** | **0.787** | **0.629** | **0.494** | **0.401** | **K.VPLLLSEPINIIDALEMR.D** 7148 7149 7150 7151 7153 7155 7156 7157 7158 |
|  | 7165 | **787.06** | **2358.15** | **2358.18** | **-0.03** | **0** | **11** | **3.6** | **1** | **---** | **---** | **---** | **---** | **---** | **---** | **K.LQDFSDQLSDYYEK.F** |
|  | 7359 | **802.46** | **2404.36** | **2404.22** | **0.14** | **0** | **3** | **36** | **2** | **---** | **---** | **---** | **---** | **---** | **---** | **K.LSNDMMGSYAEMK.F** |
|  | 7492 | **610.34** | **2437.32** | **2437.34** | **-0.02** | **0** | **42** | **0.0039** | **1** | **---** | **---** | **---** | **---** | **---** | **---** | **K.AEPLAFTFSHDYK.G** 7491 |
|  | 8070 | **843.74** | **2528.20** | **2528.34** | **-0.14** | **0** | **33** | **0.018** | **1** | **1.196** | **1.570** | **1.779** | **1.626** | **0.864** | **1.649** | **R.VIGNMGQTMEQLTPELK.S** 8069 8071 |
|  | 8093 | **849.82** | **2546.45** | **2546.51** | **-0.06** | **0** | **43** | **0.0028** | **1** | **1.236** | **0.884** | **1.095** | **1.028** | **1.139** | **1.183** | **R.VPSYTLILPSLELPVLHVPR.N** 8094 8095 |
|  | 8164 | **857.80** | **2570.39** | **2570.46** | **-0.07** | **0** | **53** | **0.00036** | **1** | **0.908** | **1.175** | **0.872** | **0.674** | **0.802** | **1.155** | **K.TILGTMPAFEVSLQALQK.A** 8155 8156 8157 8158 8159 8160 8161 8162 8163 8165 8166 8167 |
|  | 8529 | **666.13** | **2660.49** | **2660.54** | **-0.05** | **0** | **38** | **0.011** | **1** | **0.901** | **0.962** | **1.158** | **1.148** | **0.998** | **1.089** | **R.ILGEELGFASLHDLQLLGK.L** |
|  | 9287 | **962.15** | **2883.43** | **2883.48** | **-0.06** | **0** | **16** | **1.2** | **1** | **---** | **---** | **---** | **---** | **---** | **---** | **R.QSMTLSSEVQIPDFDVDLGTILR.V** 9288 |
|  | 9858 | **1025.55** | **3073.64** | **3073.78** | **-0.14** | **0** | **48** | **0.001** | **1** | **1.432** | **1.073** | **1.318** | **0.788** | **0.788** | **0.825** | **K.IADFELPTIIVPEQTIEIPSIK.F** 9854 9855 9856 9857 9859 9861 |
|  | 10052 | **630.13** | **3145.62** | **3145.62** | **0.00** | **1** | **0** | **48** | **3** | **---** | **---** | **---** | **---** | **---** | **---** | **K.VSQEGLKLSNDMMGSYAEMK.F** |
|  | 10219 | **803.92** | **3211.65** | **3211.79** | **-0.13** | **1** | **55** | **0.00017** | **1** | **1.132** | **1.158** | **0.869** | **0.538** | **0.627** | **0.659** | **K.VNWEEEAASGLLTSLKDNVPK.A** |
|  | 10427 | **863.20** | **3448.75** | **3448.91** | **-0.15** | **2** | **1** | **38** | **1** | **---** | **---** | **---** | **---** | **---** | **---** | **K.YKNFATSNKMDMTFSK.Q** |
|  | 10920 | **1013.00** | **4047.96** | **4048.15** | **-0.19** | **0** | **7** | **6.9** | **1** | **---** | **---** | **---** | **---** | **---** | **---** | **K.YSQPEDSLIPFFEITVPESQLTVSQFTLPK.S** |

  


---

|  |  |
| --- | --- |
| **5.** | P02647    **Mass:** 37756    **Score:** 2284   **Queries matched:** 194   **emPAI:** 8.75 |
|  | Apolipoprotein A-I OS=Homo sapiens GN=APOA1 PE=1 SV=1 |

|  |  |  |  |  |  |
| --- | --- | --- | --- | --- | --- |
|  | **Quantitation:** | **Ratio** | **Weighted** | **N** | **SD(geo)** |
|  |  | Patient3-Art/Control | 0.907 | 78 | NN |
|  |  | Patient3-Porta/Control | 0.761 | 78 | NN |
|  |  | Patient3-Hepa/Control | 0.850 | 76 | NN |
|  |  | Patient2-Art/Control | 1.454 | 78 | NN |
|  |  | **Patient2-Porta/Control** | **1.642** | **76** | **1.116** |
|  |  | **Patient2-Hepa/Control** | **1.066** | **78** | **1.121** |

|  |  |  |  |  |  |  |  |  |  |  |  |  |  |  |  |  |
| --- | --- | --- | --- | --- | --- | --- | --- | --- | --- | --- | --- | --- | --- | --- | --- | --- |
|  | **Query** | **Observed** | **Mr(expt)** | **Mr(calc)** | **Delta** | **Miss** | **Score** | **Expect** | **Rank** | **Patient3-Art/Control** | **Patient3-Porta/Control** | **Patient3-Hepa/Control** | **Patient2-Art/Control** | **Patient2-Porta/Control** | **Patient2-Hepa/Control** | **Peptide** |
|  | 1181 | **543.28** | **1084.55** | **1084.63** | **-0.08** | **0** | **22** | **0.35** | **1** | **---** | **---** | **---** | **---** | **---** | **---** | **R.AHVDALR.T** |
|  | 1743 | **589.28** | **1176.55** | **1176.64** | **-0.09** | **0** | **29** | **0.07** | **1** | **---** | **---** | **---** | **---** | **---** | **---** | **R.AELQEGAR.Q** 1739 1740 1741 1742 1744 1745 |
|  | 1786 | **591.36** | **1180.70** | **1180.76** | **-0.07** | **0** | **19** | **0.78** | **1** | **---** | **---** | **---** | **---** | **---** | **---** | **R.LEALK.E** 1768 1770 1772 1774 1775 1776 1778 1780 1781 1783 1785 1787 1788 1789 1790 1792 1793 1795 1797 1800 1801 |
|  | 2064 | **606.34** | **1210.67** | **1210.75** | **-0.08** | **1** | **4** | **24** | **1** | **---** | **---** | **---** | **---** | **---** | **---** | **K.KLNTQ.-** |
|  | 2106 | **612.35** | **1222.69** | **1222.79** | **-0.10** | **0** | **9** | **8.7** | **3** | **---** | **---** | **---** | **---** | **---** | **---** | **K.QLNLK.L** |
|  | 2672 | **676.30** | **1350.58** | **1350.71** | **-0.13** | **0** | **34** | **0.013** | **1** | **0.748** | **0.969** | **0.883** | **0.918** | **0.961** | **1.758** | **K.LSPLGEEMR.D** 2673 |
|  | 3032 | **480.60** | **1438.78** | **1438.84** | **-0.06** | **0** | **17** | **1.4** | **1** | **---** | **---** | **---** | **---** | **---** | **---** | **R.LAEYHAK.A** 3033 |
|  | 3282 | **502.27** | **1503.79** | **1503.89** | **-0.10** | **0** | **6** | **15** | **2** | **---** | **---** | **---** | **---** | **---** | **---** | **K.LHELQEK.L** |
|  | 3606 | **802.36** | **1602.71** | **1602.77** | **-0.05** | **0** | **21** | **0.3** | **1** | **---** | **---** | **---** | **---** | **---** | **---** | **K.WQEEMELYR.Q** 3603 3612 3615 |
|  | 3621 | **535.95** | **1604.82** | **1604.85** | **-0.03** | **0** | **20** | **0.65** | **1** | **---** | **---** | **---** | **---** | **---** | **---** | **R.THLAPYSDELR.Q** |
|  | 3629 | **536.27** | **1605.80** | **1605.85** | **-0.04** | **1** | **10** | **5.2** | **2** | **---** | **---** | **---** | **---** | **---** | **---** | **K.LSPLGEEMRDR.A** 3626 3630 |
|  | 3674 | **540.96** | **1619.87** | **1619.98** | **-0.11** | **0** | **16** | **1.6** | **1** | **---** | **---** | **---** | **---** | **---** | **---** | **K.AKPALEDLR.Q** 3670 3671 |
|  | 3684 | **541.63** | **1621.86** | **1621.84** | **0.02** | **1** | **(9)** | **8.1** | **1** | **---** | **---** | **---** | **---** | **---** | **---** | **K.LSPLGEEMRDR.A** |
|  | 4336 | **591.33** | **1770.98** | **1770.99** | **-0.01** | **1** | **16** | **1.7** | **1** | **---** | **---** | **---** | **---** | **---** | **---** | **K.VEPLRAELQEGAR.Q** 4335 |
|  | 4602 | **613.67** | **1837.97** | **1838.11** | **-0.14** | **0** | **52** | **0.00043** | **1** | **0.653** | **0.718** | **1.093** | **1.852** | **1.356** | **1.773** | **R.QGLLPVLESFK.V** 4601 4603 4604 4607 4608 4609 4611 4613 |
|  | 4646 | **922.46** | **1842.91** | **1843.09** | **-0.19** | **0** | **74** | **2.1e-006** | **1** | **0.616** | **0.872** | **0.991** | **1.013** | **1.074** | **1.420** | **K.DLATVYVDVLK.D** 4647 4648 4649 4650 4651 4652 4653 4655 4656 4657 4658 4659 4660 4663 4664 4665 4667 4668 4670 4673 4674 4677 4678 4679 4680 4681 4683 4684 4688 4691 4693 4695 4696 4700 |
|  | 4754 | **620.95** | **1859.84** | **1860.02** | **-0.19** | **0** | **47** | **0.00064** | **1** | **0.901** | **0.805** | **1.576** | **1.663** | **1.286** | **1.832** | **K.VQPYLDDFQK.K** 4755 4756 4757 4758 4759 4760 4761 4762 4763 4765 |
|  | 5313 | **665.67** | **1993.98** | **1994.12** | **-0.14** | **0** | **66** | **1.3e-005** | **1** | **0.550** | **0.718** | **0.967** | **1.517** | **2.781** | **0.620** | **K.VSFLSALEEYTK.K** 5316 5317 5318 5319 5320 5321 5322 5324 5331 5336 |
|  | 5404 | **1005.00** | **2007.99** | **2008.07** | **-0.09** | **0** | **57** | **0.0001** | **1** | **0.888** | **1.292** | **1.269** | **0.978** | **0.951** | **1.421** | **R.DYVSQFEGSALGK.Q** 5397 5398 5399 5400 5401 5402 5403 5406 5407 5408 |
|  | 5444 | **674.03** | **2019.07** | **2019.07** | **-0.01** | **1** | **(11)** | **5.1** | **1** | **---** | **---** | **---** | **---** | **---** | **---** | **K.KWQEEMELYR.Q** |
|  | 5480 | **679.33** | **2034.97** | **2035.07** | **-0.10** | **1** | **19** | **0.54** | **1** | **---** | **---** | **---** | **---** | **---** | **---** | **K.KWQEEMELYR.Q** 5470 5476 5479 5482 5483 |
|  | 6144 | **542.06** | **2164.22** | **2164.23** | **-0.00** | **0** | **(7)** | **12** | **1** | **---** | **---** | **---** | **---** | **---** | **---** | **K.VQPYLDDFQK.K** 6145 |
|  | 6653 | **741.00** | **2219.99** | **2220.19** | **-0.20** | **0** | **66** | **5e-006** | **1** | **0.919** | **0.888** | **0.979** | **1.534** | **1.577** | **0.948** | **K.LLDNWDSVTSTFSK.L** 6654 6655 6656 6657 6658 6659 6661 6662 6663 6664 6665 6666 6667 6668 6669 6671 6672 6673 6674 6675 6676 6677 6679 6680 |
|  | 6877 | **574.07** | **2292.26** | **2292.32** | **-0.07** | **1** | **17** | **1.4** | **1** | **---** | **---** | **---** | **---** | **---** | **---** | **K.VQPYLDDFQKK.W** 6879 |
|  | 6902 | **575.57** | **2298.24** | **2298.32** | **-0.08** | **0** | **(25)** | **0.2** | **1** | **---** | **---** | **---** | **---** | **---** | **---** | **K.VSFLSALEEYTK.K** |
|  | 7251 | **792.44** | **2374.31** | **2374.46** | **-0.15** | **1** | **61** | **5.2e-005** | **1** | **1.101** | **0.605** | **0.863** | **1.710** | **1.592** | **1.084** | **R.VKDLATVYVDVLK.D** 7249 7253 7257 7258 7260 7262 7263 7264 7266 7267 7268 7269 7270 7272 7273 |
|  | 7409 | **606.78** | **2423.09** | **2423.25** | **-0.16** | **1** | **(50)** | **0.00021** | **1** | **0.809** | **0.820** | **0.718** | **1.217** | **1.335** | **0.820** | **K.DSGRDYVSQFEGSALGK.Q** 7408 7410 7411 7412 7413 7414 7415 |
|  | 7434 | **607.60** | **2426.37** | **2426.42** | **-0.05** | **1** | **37** | **0.014** | **1** | **0.389** | **0.564** | **0.652** | **1.123** | **1.858** | **0.950** | **K.VSFLSALEEYTKK.L** |
|  | 8084 | **847.76** | **2540.25** | **2540.34** | **-0.09** | **0** | **34** | **0.018** | **1** | **0.187** | **0.886** | **0.410** | **0.390** | **0.829** | **1.779** | **R.EQLGPVTQEFWDNLEK.E** 8082 8085 |
|  | 9029 | **703.36** | **2809.40** | **2809.52** | **-0.13** | **1** | **55** | **0.00015** | **1** | **1.054** | **1.028** | **0.932** | **1.185** | **1.432** | **1.289** | **K.LREQLGPVTQEFWDNLEK.E** |

  


---

|  |  |
| --- | --- |
| **6.** | P02652    **Mass:** 14606    **Score:** 1863   **Queries matched:** 70   **emPAI:** 7.56 |
|  | Apolipoprotein A-II OS=Homo sapiens GN=APOA2 PE=1 SV=1 |

|  |  |  |  |  |  |
| --- | --- | --- | --- | --- | --- |
|  | **Quantitation:** | **Ratio** | **Weighted** | **N** | **SD(geo)** |
|  |  | Patient3-Art/Control | 0.910 | 34 | 2.022 |
|  |  | Patient3-Porta/Control | 1.103 | 34 | 1.920 |
|  |  | Patient3-Hepa/Control | 1.053 | 32 | 2.149 |
|  |  | Patient2-Art/Control | 1.339 | 31 | 1.743 |
|  |  | Patient2-Porta/Control | 1.400 | 33 | 1.813 |
|  |  | Patient2-Hepa/Control | 1.241 | 27 | 1.512 |

|  |  |  |  |  |  |  |  |  |  |  |  |  |  |  |  |  |
| --- | --- | --- | --- | --- | --- | --- | --- | --- | --- | --- | --- | --- | --- | --- | --- | --- |
|  | **Query** | **Observed** | **Mr(expt)** | **Mr(calc)** | **Delta** | **Miss** | **Score** | **Expect** | **Rank** | **Patient3-Art/Control** | **Patient3-Porta/Control** | **Patient3-Hepa/Control** | **Patient2-Art/Control** | **Patient2-Porta/Control** | **Patient2-Hepa/Control** | **Peptide** |
|  | 2334 | **641.29** | **1280.56** | **1280.72** | **-0.16** | **0** | **17** | **0.61** | **1** | **---** | **---** | **---** | **---** | **---** | **---** | **K.SYFEK.S** 2335 2336 2339 2342 |
|  | 3424 | **517.31** | **1548.92** | **1548.97** | **-0.05** | **0** | **23** | **0.27** | **1** | **---** | **---** | **---** | **---** | **---** | **---** | **K.EQLTPLIK.K** 3421 3422 |
|  | 5612 | **690.43** | **2068.27** | **2068.30** | **-0.03** | **1** | **35** | **0.02** | **1** | **0.903** | **1.060** | **1.022** | **1.414** | **1.581** | **1.223** | **K.SKEQLTPLIK.K** 5610 5613 5614 |
|  | 5739 | **704.73** | **2111.16** | **2111.27** | **-0.11** | **1** | **20** | **0.64** | **1** | **---** | **---** | **---** | **---** | **---** | **---** | **K.VKSPELQAEAK.S** |
|  | 8602 | **897.10** | **2688.27** | **2688.40** | **-0.13** | **0** | **86** | **8.4e-008** | **1** | **###** | **###** | **###** | **###** | **###** | **###** | **K.AGTELVNFLSYFVELGTQPATQ.-** 8600 8601 8604 8605 8606 8608 8609 8610 8612 8613 |
|  | 9453 | **983.14** | **2946.39** | **2946.46** | **-0.07** | **0** | **96** | **7.3e-009** | **1** | **0.921** | **1.680** | **1.387** | **1.476** | **0.955** | **1.701** | **K.EPCVESLVSQYFQTVTDYGK.D** 9434 9435 9436 9437 9438 9439 9440 9441 9442 9443 9444 9445 9446 9448 9449 9450 9451 9452 9454 9455 9456 9457 |
|  | 9979 | **1041.20** | **3120.58** | **3120.70** | **-0.12** | **1** | **122** | **3.5e-011** | **1** | **0.602** | **0.520** | **0.611** | **-0.035** | **0.277** | **0.529** | **K.KAGTELVNFLSYFVELGTQPATQ.-** 9971 9972 9973 9974 9975 9976 9977 9978 9980 9982 9983 9984 9985 9986 9987 9988 9989 9990 9991 9992 9993 |
|  | 10797 | **971.70** | **3882.76** | **3882.95** | **-0.19** | **1** | **5** | **5.1** | **1** | **---** | **---** | **---** | **---** | **---** | **---** | **K.EPCVESLVSQYFQTVTDYGKDLMEK.V** |

  


---

|  |  |
| --- | --- |
| **7.** | P01011    **Mass:** 55972    **Score:** 1161   **Queries matched:** 100   **emPAI:** 1.09 |
|  | Alpha-1-antichymotrypsin OS=Homo sapiens GN=SERPINA3 PE=1 SV=2 |

|  |  |  |  |  |  |
| --- | --- | --- | --- | --- | --- |
|  | **Quantitation:** | **Ratio** | **Weighted** | **N** | **SD(geo)** |
|  |  | Patient3-Art/Control | 0.680 | 35 | NN |
|  |  | **Patient3-Porta/Control** | **0.761** | **35** | **1.198** |
|  |  | Patient3-Hepa/Control | 0.694 | 35 | NN |
|  |  | Patient2-Art/Control | 0.662 | 35 | NN |
|  |  | **Patient2-Porta/Control** | **0.560** | **34** | **1.189** |
|  |  | Patient2-Hepa/Control | 0.773 | 34 | NN |

|  |  |  |  |  |  |  |  |  |  |  |  |  |  |  |  |  |
| --- | --- | --- | --- | --- | --- | --- | --- | --- | --- | --- | --- | --- | --- | --- | --- | --- |
|  | **Query** | **Observed** | **Mr(expt)** | **Mr(calc)** | **Delta** | **Miss** | **Score** | **Expect** | **Rank** | **Patient3-Art/Control** | **Patient3-Porta/Control** | **Patient3-Hepa/Control** | **Patient2-Art/Control** | **Patient2-Porta/Control** | **Patient2-Hepa/Control** | **Peptide** |
|  | 2276 | **632.78** | **1263.55** | **1263.71** | **-0.16** | **0** | **36** | **0.0086** | **1** | **0.607** | **1.023** | **0.773** | **1.003** | **0.468** | **0.532** | **K.ADLSGITGAR.N** 2275 2277 2278 |
|  | 2280 | **633.31** | **1264.61** | **1264.76** | **-0.15** | **0** | **11** | **4.1** | **1** | **---** | **---** | **---** | **---** | **---** | **---** | **R.FYLSK.K** 2282 2283 2284 2285 |
|  | 2307 | **639.33** | **1276.64** | **1276.73** | **-0.09** | **0** | **49** | **0.00061** | **1** | **0.741** | **0.798** | **0.469** | **0.667** | **0.378** | **0.499** | **K.EQLSLLDR.F** 2304 2305 2306 2308 2309 2311 2312 2314 2315 2316 |
|  | 2469 | **655.90** | **1309.78** | **1309.84** | **-0.06** | **0** | **27** | **0.11** | **1** | **---** | **---** | **---** | **---** | **---** | **---** | **K.ITDLIK.D** 2466 2467 2468 2470 |
|  | 3330 | **760.42** | **1518.83** | **1518.93** | **-0.10** | **0** | **38** | **0.0084** | **1** | **0.785** | **0.652** | **0.602** | **0.794** | **0.692** | **0.798** | **K.ITLLSALVETR.T** 3329 3331 3332 3333 3334 3335 3338 3339 |
|  | 3895 | **557.30** | **1668.89** | **1668.99** | **-0.10** | **0** | **27** | **0.12** | **1** | **---** | **---** | **---** | **---** | **---** | **---** | **R.EIGELYLPK.F** 3896 3897 3898 3900 3901 |
|  | 4966 | **635.72** | **1904.14** | **1904.19** | **-0.04** | **1** | **28** | **0.11** | **1** | **---** | **---** | **---** | **---** | **---** | **---** | **K.KLINDYVK.N** |
|  | 7917 | **834.06** | **2499.16** | **2499.27** | **-0.11** | **0** | **75** | **8.6e-007** | **1** | **0.756** | **0.714** | **0.686** | **0.870** | **0.714** | **1.052** | **R.LYGSEAFATDFQDSAAAK.K** 7918 7920 7924 7926 7928 7929 7930 7931 7932 |
|  | 7994 | **839.42** | **2515.24** | **2515.36** | **-0.13** | **0** | **75** | **1.6e-006** | **1** | **0.695** | **0.991** | **0.622** | **0.714** | **0.949** | **0.726** | **K.AVLDVFEEGTEASAATAVK.I** 7989 7990 7991 7992 7993 7995 7996 7997 7998 7999 8000 8002 8003 8004 8007 8008 8009 8010 8011 8012 8013 8014 8015 8016 8017 8020 8021 8024 8025 8026 8027 8029 8032 8034 8035 8036 8037 8038 8039 8040 8041 8042 |
|  | 8667 | **902.12** | **2703.33** | **2703.41** | **-0.08** | **0** | **53** | **0.00022** | **1** | **0.397** | **0.383** | **0.768** | **0.585** | **0.526** | **0.530** | **K.DLDSQTMMVLVNYIFFK.A** 8668 8669 8670 8671 |
|  | 9381 | **968.84** | **2903.51** | **2903.57** | **-0.07** | **0** | **17** | **1.1** | **1** | **---** | **---** | **---** | **---** | **---** | **---** | **R.DYNLNDILLQLGIEEAFTSK.A** |

  


---

|  |  |
| --- | --- |
| **8.** | P02675    **Mass:** 67700    **Score:** 1096   **Queries matched:** 131   **emPAI:** 2.20 |
|  | Fibrinogen beta chain OS=Homo sapiens GN=FGB PE=1 SV=2 |

|  |  |  |  |  |  |
| --- | --- | --- | --- | --- | --- |
|  | **Quantitation:** | **Ratio** | **Weighted** | **N** | **SD(geo)** |
|  |  | **Patient3-Art/Control** | **0.926** | **55** | **1.073** |
|  |  | **Patient3-Porta/Control** | **1.071** | **55** | **1.071** |
|  |  | **Patient3-Hepa/Control** | **0.711** | **55** | **1.079** |
|  |  | **Patient2-Art/Control** | **1.099** | **55** | **1.069** |
|  |  | Patient2-Porta/Control | 1.005 | 55 | NN |
|  |  | **Patient2-Hepa/Control** | **0.893** | **54** | **1.046** |

|  |  |  |  |  |  |  |  |  |  |  |  |  |  |  |  |  |
| --- | --- | --- | --- | --- | --- | --- | --- | --- | --- | --- | --- | --- | --- | --- | --- | --- |
|  | **Query** | **Observed** | **Mr(expt)** | **Mr(calc)** | **Delta** | **Miss** | **Score** | **Expect** | **Rank** | **Patient3-Art/Control** | **Patient3-Porta/Control** | **Patient3-Hepa/Control** | **Patient2-Art/Control** | **Patient2-Porta/Control** | **Patient2-Hepa/Control** | **Peptide** |
|  | 789 | **511.24** | **1020.47** | **1020.62** | **-0.15** | **0** | **27** | **0.1** | **2** | **---** | **---** | **---** | **---** | **---** | **---** | **K.ISQLTR.M** 790 791 792 796 799 801 802 |
|  | 1598 | **574.82** | **1147.62** | **1147.69** | **-0.07** | **0** | **40** | **0.0059** | **1** | **0.877** | **0.985** | **0.567** | **0.988** | **1.368** | **0.886** | **R.SILENLR.S** 1587 1588 1589 1590 1591 1592 1593 1594 1595 1596 1597 1599 1600 1601 |
|  | 1915 | **599.31** | **1196.60** | **1196.73** | **-0.14** | **0** | **25** | **0.2** | **1** | **---** | **---** | **---** | **---** | **---** | **---** | **K.AAATQK.K** 1917 |
|  | 2017 | **603.78** | **1205.55** | **1205.58** | **-0.03** | **0** | **1** | **33** | **1** | **---** | **---** | **---** | **---** | **---** | **---** | **K.GSWYSMR.K** |
|  | 2153 | **621.26** | **1240.50** | **1240.61** | **-0.11** | **0** | **45** | **0.00062** | **1** | **1.209** | **1.707** | **0.754** | **1.026** | **0.969** | **0.910** | **K.ECEEIIR.K** 2144 2145 2146 2147 2148 2149 2150 2151 2152 2154 2155 2156 2157 2158 2160 2161 2162 2163 2164 2165 2166 2167 2168 2169 2170 2171 2172 2173 2174 2175 |
|  | 2365 | **642.74** | **1283.46** | **1283.64** | **-0.19** | **0** | **55** | **1.8e-005** | **1** | **0.896** | **0.777** | **0.461** | **1.143** | **1.183** | **0.830** | **R.QDGSVDFGR.K** |
|  | 2395 | **649.34** | **1296.67** | **1296.77** | **-0.10** | **0** | **18** | **1.3** | **1** | **---** | **---** | **---** | **---** | **---** | **---** | **K.DLWQK.R** |
|  | 2611 | **668.84** | **1335.66** | **1335.76** | **-0.10** | **0** | **30** | **0.066** | **1** | **---** | **---** | **---** | **---** | **---** | **---** | **K.IRPFFPQQ.-** 2606 2607 2608 2609 2610 2612 2613 2614 2615 2616 |
|  | 3142 | **730.36** | **1458.71** | **1458.87** | **-0.16** | **0** | **14** | **2.2** | **2** | **---** | **---** | **---** | **---** | **---** | **---** | **K.YQISVNK.Y** 3143 |
|  | 3407 | **772.33** | **1542.64** | **1542.72** | **-0.07** | **0** | **18** | **0.27** | **1** | **---** | **---** | **---** | **---** | **---** | **---** | **K.EDGGGWWYNR.C** 3408 |
|  | 3527 | **523.60** | **1567.78** | **1567.92** | **-0.14** | **1** | **3** | **27** | **1** | **---** | **---** | **---** | **---** | **---** | **---** | **R.KMSMK.I** |
|  | 4242 | **583.67** | **1747.98** | **1748.04** | **-0.06** | **1** | **8** | **13** | **2** | **---** | **---** | **---** | **---** | **---** | **---** | **R.KWDPYK.Q** 4241 4243 |
|  | 4715 | **616.63** | **1846.88** | **1846.92** | **-0.04** | **0** | **(14)** | **1.7** | **1** | **---** | **---** | **---** | **---** | **---** | **---** | **K.EDGGGWWYNR.C** 4713 |
|  | 4936 | **948.86** | **1895.71** | **1895.84** | **-0.13** | **0** | **19** | **0.042** | **1** | **0.708** | **1.001** | **0.688** | **1.095** | **0.628** | **0.769** | **K.LESDVSAQMEYCR.T** 4935 4937 4939 4940 |
|  | 6470 | **734.30** | **2199.89** | **2200.04** | **-0.15** | **0** | **(4)** | **2.2** | **1** | **---** | **---** | **---** | **---** | **---** | **---** | **K.LESDVSAQMEYCR.T** 6472 6475 |
|  | 6494 | **735.66** | **2203.97** | **2204.13** | **-0.16** | **0** | **61** | **1.5e-005** | **1** | **0.870** | **1.353** | **1.101** | **1.297** | **0.860** | **0.728** | **R.TPCTVSCNIPVVSGK.E** 6492 6493 6495 6496 6497 6498 6499 6500 6501 6503 |
|  | 6861 | **765.01** | **2292.01** | **2292.11** | **-0.10** | **0** | **58** | **2.8e-005** | **1** | **1.051** | **1.047** | **0.787** | **1.095** | **1.061** | **0.833** | **R.YYWGGQYTWDMAK.H** 6862 6864 6865 6867 6869 |
|  | 7126 | **778.05** | **2331.12** | **2331.20** | **-0.07** | **0** | **39** | **0.0046** | **1** | **0.652** | **0.921** | **0.803** | **0.564** | **0.468** | **1.102** | **R.MGPTELLIEMEDWK.G** 7125 7128 7129 7130 |
|  | 7276 | **793.03** | **2376.06** | **2376.19** | **-0.13** | **0** | **40** | **0.0022** | **1** | **0.855** | **1.039** | **1.184** | **0.854** | **0.361** | **1.100** | **K.DNENVVNEYSSELEK.H** 7277 7278 |
|  | 7282 | **795.00** | **2381.99** | **2382.16** | **-0.17** | **0** | **52** | **5.6e-005** | **1** | **1.306** | **0.620** | **0.817** | **1.020** | **0.804** | **0.884** | **K.NYCGLPGEYWLGNDK.I** 7283 7284 7285 |
|  | 7440 | **811.06** | **2430.15** | **2430.28** | **-0.13** | **0** | **91** | **3e-008** | **1** | **0.823** | **0.775** | **0.775** | **1.196** | **1.036** | **1.056** | **K.HQLYIDETVNSNIPTNLR.V** 7444 |
|  | 8145 | **643.30** | **2569.16** | **2569.28** | **-0.12** | **1** | **40** | **0.0024** | **1** | **0.731** | **0.734** | **0.795** | **0.868** | **0.256** | **1.245** | **K.IQKLESDVSAQMEYCR.T** 8150 8153 |
|  | 8295 | **650.08** | **2596.29** | **2596.32** | **-0.03** | **0** | **(19)** | **0.66** | **1** | **---** | **---** | **---** | **---** | **---** | **---** | **R.YYWGGQYTWDMAK.H** |
|  | 8596 | **672.59** | **2686.31** | **2686.37** | **-0.05** | **0** | **(21)** | **0.4** | **1** | **---** | **---** | **---** | **---** | **---** | **---** | **K.NYCGLPGEYWLGNDK.I** 8594 |
|  | 8729 | **684.61** | **2734.39** | **2734.49** | **-0.09** | **0** | **(59)** | **6.2e-005** | **1** | **---** | **---** | **---** | **---** | **---** | **---** | **K.HQLYIDETVNSNIPTNLR.V** 8731 |
|  | 9403 | **730.89** | **2919.54** | **2919.55** | **-0.00** | **1** | **41** | **0.0046** | **1** | **2.048** | **2.033** | **1.131** | **1.625** | **1.220** | **1.028** | **R.MGPTELLIEMEDWKGDK.V** 9404 |
|  | 10239 | **656.94** | **3279.68** | **3279.78** | **-0.09** | **1** | **49** | **0.00064** | **1** | **0.754** | **0.610** | **0.791** | **1.018** | **1.188** | **0.765** | **K.AHYGGFTVQNEANKYQISVNK.Y** |
|  | 10670 | **948.73** | **3790.89** | **3790.88** | **0.01** | **0** | **0** | **40** | **1** | **---** | **---** | **---** | **---** | **---** | **---** | **R.NSVDELNNNVEAVSQTSSSSFQYMYLLK.D** |

  


---

|  |  |
| --- | --- |
| **9.** | P00450    **Mass:** 143199   **Score:** 984    **Queries matched:** 66   **emPAI:** 0.42 |
|  | Ceruloplasmin OS=Homo sapiens GN=CP PE=1 SV=1 |

|  |  |  |  |  |  |
| --- | --- | --- | --- | --- | --- |
|  | **Quantitation:** | **Ratio** | **Weighted** | **N** | **SD(geo)** |
|  |  | **Patient3-Art/Control** | **1.043** | **23** | **1.131** |
|  |  | **Patient3-Porta/Control** | **1.137** | **23** | **1.166** |
|  |  | **Patient3-Hepa/Control** | **0.929** | **23** | **1.187** |
|  |  | Patient2-Art/Control | 0.920 | 23 | 1.158 |
|  |  | **Patient2-Porta/Control** | **0.837** | **23** | **1.174** |
|  |  | **Patient2-Hepa/Control** | **0.830** | **24** | **1.229** |

|  |  |  |  |  |  |  |  |  |  |  |  |  |  |  |  |  |
| --- | --- | --- | --- | --- | --- | --- | --- | --- | --- | --- | --- | --- | --- | --- | --- | --- |
|  | **Query** | **Observed** | **Mr(expt)** | **Mr(calc)** | **Delta** | **Miss** | **Score** | **Expect** | **Rank** | **Patient3-Art/Control** | **Patient3-Porta/Control** | **Patient3-Hepa/Control** | **Patient2-Art/Control** | **Patient2-Porta/Control** | **Patient2-Hepa/Control** | **Peptide** |
|  | 2557 | **661.32** | **1320.63** | **1320.66** | **-0.03** | **0** | **27** | **0.078** | **1** | **---** | **---** | **---** | **---** | **---** | **---** | **R.QYTDSTFR.V** |
|  | 3301 | **754.35** | **1506.69** | **1506.73** | **-0.04** | **0** | **16** | **0.92** | **1** | **---** | **---** | **---** | **---** | **---** | **---** | **R.EYTDASFTNR.K** |
|  | 3958 | **559.31** | **1674.92** | **1674.96** | **-0.05** | **0** | **60** | **6e-005** | **1** | **1.707** | **1.327** | **1.092** | **0.702** | **0.335** | **0.443** | **K.GAYPLSIEPIGVR.F** 3951 3953 3954 3959 3960 3961 3963 3964 3965 |
|  | 4513 | **605.99** | **1814.94** | **1815.04** | **-0.10** | **0** | **17** | **1.4** | **1** | **---** | **---** | **---** | **---** | **---** | **---** | **K.DIFTGLIGPMK.I** |
|  | 4548 | **912.42** | **1822.82** | **1822.94** | **-0.12** | **0** | **67** | **6.1e-006** | **1** | **1.164** | **1.738** | **1.287** | **1.551** | **0.664** | **1.191** | **K.ALYLQYTDETFR.T** 4549 4550 4551 4552 |
|  | 4808 | **623.68** | **1868.01** | **1868.02** | **-0.01** | **0** | **79** | **7.9e-007** | **1** | **1.005** | **0.564** | **0.837** | **0.598** | **0.597** | **0.221** | **K.DLYSGLIGPLIVCR.R** 4795 4796 4797 4799 4800 4804 4807 |
|  | 5250 | **660.69** | **1979.05** | **1979.17** | **-0.12** | **0** | **(17)** | **1.3** | **1** | **---** | **---** | **---** | **---** | **---** | **---** | **K.GAYPLSIEPIGVR.F** 5251 |
|  | 5560 | **689.69** | **2066.06** | **2066.21** | **-0.15** | **0** | **81** | **5.1e-007** | **1** | **1.129** | **1.024** | **1.059** | **0.733** | **0.893** | **0.579** | **K.DIASGLIGPLIICK.K** 5561 5562 5564 5565 5566 5567 5568 5569 5570 5573 5574 5575 |
|  | 5586 | **690.00** | **2066.97** | **2067.10** | **-0.13** | **0** | **58** | **6.1e-005** | **1** | **1.059** | **1.320** | **0.975** | **1.215** | **0.810** | **0.755** | **K.EVGPTNADPVCLAK.M** 5585 5589 5591 5594 5601 5603 5605 5606 |
|  | 5928 | **710.03** | **2127.08** | **2127.15** | **-0.06** | **0** | **(25)** | **0.16** | **1** | **---** | **---** | **---** | **---** | **---** | **---** | **K.ALYLQYTDETFR.T** |
|  | 8956 | **931.18** | **2790.51** | **2790.49** | **0.02** | **0** | **29** | **0.077** | **1** | **---** | **---** | **---** | **---** | **---** | **---** | **R.GPEEEHLGILGPVIWAEVGDTIR.V** |
|  | 9066 | **706.90** | **2823.59** | **2823.74** | **-0.15** | **0** | **51** | **0.00048** | **1** | **1.086** | **1.203** | **0.596** | **1.024** | **1.036** | **0.841** | **R.TTIEKPVWLGFLGPIIK.A** 9067 9068 9069 9070 |
|  | 9540 | **997.11** | **2988.30** | **2988.45** | **-0.15** | **0** | **45** | **0.00031** | **1** | **1.812** | **1.367** | **1.881** | **0.619** | **1.262** | **1.029** | **R.GVYSSDVFDIFPGTYQTLEMFPR.T** 9541 9542 9544 9545 |
|  | 10021 | **628.32** | **3136.56** | **3136.49** | **0.07** | **0** | **4** | **18** | **1** | **---** | **---** | **---** | **---** | **---** | **---** | **K.MHSMNGFMYGNQPGLTMCK.G** |
|  | 10246 | **823.66** | **3290.60** | **3290.77** | **-0.17** | **1** | **13** | **2.1** | **1** | **---** | **---** | **---** | **---** | **---** | **---** | **K.MYYSAVDPTKDIFTGLIGPMK.I** 10247 |
|  | 10662 | **942.96** | **3767.81** | **3767.94** | **-0.13** | **1** | **21** | **0.27** | **1** | **---** | **---** | **---** | **---** | **---** | **---** | **K.DVDKEFYLFPTVFDENESLLLEDNIR.M** |

  


---

|  |  |
| --- | --- |
| **10.** | P02790    **Mass:** 58934    **Score:** 765    **Queries matched:** 45   **emPAI:** 0.75 |
|  | Hemopexin OS=Homo sapiens GN=HPX PE=1 SV=2 |

|  |  |  |  |  |  |
| --- | --- | --- | --- | --- | --- |
|  | **Quantitation:** | **Ratio** | **Weighted** | **N** | **SD(geo)** |
|  |  | Patient3-Art/Control | 0.988 | 23 | NN |
|  |  | **Patient3-Porta/Control** | **1.011** | **23** | **1.183** |
|  |  | Patient3-Hepa/Control | 0.908 | 23 | NN |
|  |  | Patient2-Art/Control | 0.980 | 23 | NN |
|  |  | **Patient2-Porta/Control** | **0.956** | **22** | **1.132** |
|  |  | Patient2-Hepa/Control | 1.009 | 23 | 1.179 |

|  |  |  |  |  |  |  |  |  |  |  |  |  |  |  |  |  |
| --- | --- | --- | --- | --- | --- | --- | --- | --- | --- | --- | --- | --- | --- | --- | --- | --- |
|  | **Query** | **Observed** | **Mr(expt)** | **Mr(calc)** | **Delta** | **Miss** | **Score** | **Expect** | **Rank** | **Patient3-Art/Control** | **Patient3-Porta/Control** | **Patient3-Hepa/Control** | **Patient2-Art/Control** | **Patient2-Porta/Control** | **Patient2-Hepa/Control** | **Peptide** |
|  | 2757 | 687.36 | 1372.71 | 1372.80 | -0.09 | 0 | 8 | 16 | 9 | --- | --- | --- | --- | --- | --- | K.GEFVWK.S 2758 2761 2763 |
|  | 3097 | **726.28** | **1450.54** | **1450.64** | **-0.09** | **0** | **35** | **0.0019** | **1** | **1.370** | **0.949** | **0.909** | **0.505** | **0.818** | **0.715** | **R.DYFMPCPGR.G** 3095 3096 3098 3099 3104 3105 |
|  | 3342 | **762.86** | **1523.70** | **1523.80** | **-0.11** | **0** | **64** | **1.7e-005** | **1** | **1.052** | **1.059** | **0.774** | **1.557** | **0.542** | **1.497** | **K.NFPSPVDAAFR.Q** 3341 3343 3344 3346 3347 |
|  | 3532 | **524.98** | **1571.92** | **1571.87** | **0.05** | **1** | **17** | **1.3** | **1** | **---** | **---** | **---** | **---** | **---** | **---** | **R.FDPVRGEVPPR.Y** |
|  | 3733 | **545.93** | **1634.76** | **1634.83** | **-0.07** | **0** | **33** | **0.019** | **1** | **0.873** | **0.904** | **0.912** | **0.913** | **0.940** | **1.132** | **K.VDGALCMEK.S** 3730 3731 3732 3734 |
|  | 4210 | **580.02** | **1737.04** | **1737.06** | **-0.01** | **1** | **19** | **0.75** | **1** | **---** | **---** | **---** | **---** | **---** | **---** | **R.RLWWLDLK.S** |
|  | 4246 | **583.97** | **1748.89** | **1748.99** | **-0.10** | **0** | **43** | **0.0033** | **1** | **0.692** | **1.270** | **1.145** | **0.851** | **0.884** | **1.106** | **K.GGYTLVSGYPK.R** 4245 4247 |
|  | 4255 | **585.95** | **1754.82** | **1754.84** | **-0.02** | **0** | **(3)** | **23** | **1** | **---** | **---** | **---** | **---** | **---** | **---** | **R.DYFMPCPGR.G** |
|  | 5683 | **698.33** | **2091.96** | **2092.05** | **-0.09** | **0** | **7** | **5.9** | **1** | **---** | **---** | **---** | **---** | **---** | **---** | **R.YYCFQGNQFLR.F** |
|  | 8513 | **886.42** | **2656.23** | **2656.33** | **-0.10** | **0** | **85** | **7.9e-008** | **1** | **1.142** | **0.928** | **0.993** | **1.075** | **0.949** | **0.931** | **K.LLQDEFPGIPSPLDAAVECHR.G** 8509 8510 8511 8512 8514 8515 |
|  | 8944 | **931.08** | **2790.23** | **2790.40** | **-0.17** | **0** | **100** | **1.6e-009** | **1** | **0.884** | **0.823** | **1.138** | **0.761** | **0.781** | **0.965** | **K.EVGTPHGIILDSVDAAFICPGSSR.L** 8945 8946 8948 8950 8952 8953 8954 8955 |

  


---

|  |  |
| --- | --- |
| **11.** | P02765    **Mass:** 45115    **Score:** 720    **Queries matched:** 100   **emPAI:** 1.07 |
|  | Alpha-2-HS-glycoprotein OS=Homo sapiens GN=AHSG PE=1 SV=1 |

|  |  |  |  |  |  |
| --- | --- | --- | --- | --- | --- |
|  | **Quantitation:** | **Ratio** | **Weighted** | **N** | **SD(geo)** |
|  |  | **Patient3-Art/Control** | **1.274** | **19** | **1.661** |
|  |  | **Patient3-Porta/Control** | **1.175** | **20** | **1.718** |
|  |  | **Patient3-Hepa/Control** | **1.169** | **20** | **1.518** |
|  |  | Patient2-Art/Control | 1.146 | 20 | 1.552 |
|  |  | Patient2-Porta/Control | 0.970 | 19 | 1.574 |
|  |  | Patient2-Hepa/Control | 0.989 | 15 | 1.515 |

|  |  |  |  |  |  |  |  |  |  |  |  |  |  |  |  |  |
| --- | --- | --- | --- | --- | --- | --- | --- | --- | --- | --- | --- | --- | --- | --- | --- | --- |
|  | **Query** | **Observed** | **Mr(expt)** | **Mr(calc)** | **Delta** | **Miss** | **Score** | **Expect** | **Rank** | **Patient3-Art/Control** | **Patient3-Porta/Control** | **Patient3-Hepa/Control** | **Patient2-Art/Control** | **Patient2-Porta/Control** | **Patient2-Hepa/Control** | **Peptide** |
|  | 2134 | **411.57** | **1231.67** | **1231.79** | **-0.11** | **0** | **8** | **9.5** | **1** | **---** | **---** | **---** | **---** | **---** | **---** | **R.VVHAAK.A** |
|  | 2856 | **700.33** | **1398.65** | **1398.72** | **-0.08** | **0** | **23** | **0.24** | **1** | **---** | **---** | **---** | **---** | **---** | **---** | **K.QYGFCK.A** 2852 2853 |
|  | 2969 | **711.39** | **1420.76** | **1420.85** | **-0.10** | **0** | **24** | **0.26** | **1** | **---** | **---** | **---** | **---** | **---** | **---** | **K.FSVVYAK.C** 2962 2963 2964 2965 2966 2967 2968 2970 2971 2972 2973 |
|  | 3044 | **722.86** | **1443.70** | **1443.80** | **-0.11** | **0** | **34** | **0.02** | **1** | **1.448** | **1.366** | **1.478** | **1.680** | **1.502** | **1.249** | **K.CNLLAEK.Q** |
|  | 4173 | **576.01** | **1725.00** | **1725.06** | **-0.06** | **0** | **(6)** | **19** | **1** | **---** | **---** | **---** | **---** | **---** | **---** | **K.FSVVYAK.C** |
|  | 4467 | **602.33** | **1803.97** | **1804.03** | **-0.07** | **0** | **32** | **0.037** | **1** | **1.298** | **1.219** | **1.093** | **1.170** | **0.973** | **0.952** | **K.HTLNQIDEVK.V** |
|  | 6759 | **753.37** | **2257.08** | **2257.13** | **-0.06** | **0** | **56** | **0.00011** | **1** | **1.216** | **0.795** | **1.257** | **1.042** | **0.897** | **1.163** | **K.EHAVEGDCDFQLLK.L** 6756 6757 6758 6760 6761 6762 6763 |
|  | 6940 | **770.40** | **2308.16** | **2308.23** | **-0.07** | **0** | **87** | **1.1e-007** | **1** | **1.621** | **1.851** | **1.756** | **0.739** | **0.854** | **1.216** | **R.TVVQPSVGAAAGPVVPPCPGR.I** 6936 6937 6938 6939 6941 6942 6944 6945 6946 6947 |
|  | 9418 | **733.64** | **2930.55** | **2930.58** | **-0.03** | **1** | **7** | **11** | **1** | **---** | **---** | **---** | **---** | **---** | **---** | **R.QLKEHAVEGDCDFQLLK.L** |
|  | 10184 | **1059.54** | **3175.58** | **3175.68** | **-0.09** | **0** | **66** | **1.3e-005** | **1** | **0.919** | **1.125** | **1.083** | **1.003** | **0.763** | **0.332** | **R.AQLVPLPPSTYVEFTVSGTDCVAK.E** 10120 10121 10122 10123 10124 10126 10127 10128 10129 10130 10132 10133 10134 10135 10136 10138 10139 10140 10141 10142 10145 10146 10147 10148 10149 10150 10151 10152 10153 10156 10157 10161 10164 10168 10169 10171 10172 10173 10177 10179 10182 10183 10185 10187 10188 10190 10196 10197 10462 | **870.96** | **3479.83** | **3479.88** | **-0.06** | **0** | **(19)** | **0.7** | **1** | **---** | **---** | **---** | **---** | **---** | **---** | **R.AQLVPLPPSTYVEFTVSGTDCVAK.E** 10459 10461 10464 10468 10472 |
|  | 10849 | **991.03** | **3960.11** | **3959.92** | **0.19** | **0** | **13** | **2.2** | **1** | **---** | **---** | **---** | **---** | **---** | **---** | **R.QPNCDDPETEEAALVAIDYINQNLPWGYK.H** |

  


---

|  |  |
| --- | --- |
| **12.** | P02679    **Mass:** 62632    **Score:** 708    **Queries matched:** 106   **emPAI:** 1.52 |
|  | Fibrinogen gamma chain OS=Homo sapiens GN=FGG PE=1 SV=3 |

|  |  |  |  |  |  |
| --- | --- | --- | --- | --- | --- |
|  | **Quantitation:** | **Ratio** | **Weighted** | **N** | **SD(geo)** |
|  |  | **Patient3-Art/Control** | **0.848** | **21** | **1.174** |
|  |  | **Patient3-Porta/Control** | **0.813** | **21** | **1.144** |
|  |  | **Patient3-Hepa/Control** | **0.805** | **22** | **1.169** |
|  |  | Patient2-Art/Control | 1.021 | 22 | NN |
|  |  | **Patient2-Porta/Control** | **0.969** | **21** | **1.106** |
|  |  | **Patient2-Hepa/Control** | **0.989** | **22** | **1.129** |

|  |  |  |  |  |  |  |  |  |  |  |  |  |  |  |  |  |
| --- | --- | --- | --- | --- | --- | --- | --- | --- | --- | --- | --- | --- | --- | --- | --- | --- |
|  | **Query** | **Observed** | **Mr(expt)** | **Mr(calc)** | **Delta** | **Miss** | **Score** | **Expect** | **Rank** | **Patient3-Art/Control** | **Patient3-Porta/Control** | **Patient3-Hepa/Control** | **Patient2-Art/Control** | **Patient2-Porta/Control** | **Patient2-Hepa/Control** | **Peptide** |
|  | 1002 | **532.31** | **1062.61** | **1062.65** | **-0.04** | **0** | **19** | **0.46** | **3** | **---** | **---** | **---** | **---** | **---** | **---** | **K.IIPFNR.L** 991 1003 1004 1015 1016 1028 |
|  | 1886 | **597.88** | **1193.75** | **1193.80** | **-0.05** | **0** | **18** | **0.83** | **1** | **---** | **---** | **---** | **---** | **---** | **---** | **K.IVNLK.E** 1871 1872 1873 1874 1875 1876 1877 1878 1879 1880 1881 1882 1883 1884 1885 1887 1889 1891 1892 1894 1895 1896 |
|  | 2971 | 711.41 | 1420.80 | 1420.73 | 0.07 | 0 | 11 | 6.1 | 4 | --- | --- | --- | --- | --- | --- | R.VELEDWNGR.T 2961 2962 |
|  | 3145 | **730.41** | **1458.81** | **1458.84** | **-0.04** | **0** | **15** | **1.9** | **2** | **---** | **---** | **---** | **---** | **---** | **---** | **K.NWIQYK.E** 3144 |
|  | 3168 | **738.78** | **1475.54** | **1475.62** | **-0.08** | **0** | **17** | **0.11** | **1** | **---** | **---** | **---** | **---** | **---** | **---** | **R.DNCCILDER.F** 3165 3166 3167 3170 |
|  | 3495 | **520.89** | **1559.66** | **1559.79** | **-0.13** | **0** | **24** | **0.083** | **1** | **---** | **---** | **---** | **---** | **---** | **---** | **K.DCQDIANK.G** |
|  | 3769 | **548.30** | **1641.87** | **1641.93** | **-0.06** | **1** | **11** | **5.1** | **1** | **---** | **---** | **---** | **---** | **---** | **---** | **K.VGPEADKYR.L** |
|  | 3820 | **548.99** | **1643.96** | **1643.95** | **0.01** | **1** | **13** | **3.7** | **1** | **---** | **---** | **---** | **---** | **---** | **---** | **K.RLDGSVDFK.K** 3809 3812 3814 3816 3817 3818 |
|  | 4216 | **581.61** | **1741.81** | **1741.92** | **-0.10** | **0** | **(30)** | **0.041** | **1** | **3.588** | **3.254** | **1.656** | **2.610** | **2.300** | **1.449** | **R.TSTADYAMFK.V** 4215 |
|  | 4262 | 586.95 | 1757.84 | 1757.91 | -0.07 | 0 | 40 | 0.004 | 1 | 0.708 | 0.581 | 0.632 | 0.678 | 1.083 | 0.941 | R.TSTADYAMFK.V 4258 4259 4260 4261 4264 |
|  | 5013 | **641.05** | **1920.14** | **1920.14** | **-0.00** | **1** | **15** | **2.1** | **1** | **---** | **---** | **---** | **---** | **---** | **---** | **R.LDGSVDFKK.N** |
|  | 5148 | **650.70** | **1949.08** | **1949.15** | **-0.07** | **1** | **16** | **1.9** | **1** | **---** | **---** | **---** | **---** | **---** | **---** | **R.KMLEEIMK.Y** 5149 |
|  | 5224 | **656.03** | **1965.08** | **1965.14** | **-0.06** | **1** | **(7)** | **12** | **1** | **---** | **---** | **---** | **---** | **---** | **---** | **R.KMLEEIMK.Y** |
|  | 5281 | **663.01** | **1986.00** | **1986.16** | **-0.15** | **0** | **92** | **3.9e-008** | **1** | **0.803** | **0.669** | **0.540** | **0.927** | **1.110** | **0.885** | **K.IHLISTQSAIPYALR.V** 5282 5283 5284 5285 5286 |
|  | 5646 | **520.05** | **2076.15** | **2076.25** | **-0.09** | **2** | **8** | **11** | **1** | **---** | **---** | **---** | **---** | **---** | **---** | **K.RLDGSVDFKK.N** |
|  | 5699 | **525.75** | **2098.99** | **2099.15** | **-0.16** | **0** | **4** | **15** | **2** | **---** | **---** | **---** | **---** | **---** | **---** | **K.YEASILTHDSSIR.Y** |
|  | 5908 | **708.01** | **2121.01** | **2121.13** | **-0.13** | **0** | **45** | **0.0014** | **1** | **0.995** | **0.983** | **0.906** | **1.176** | **1.059** | **1.170** | **R.YLQEIYNSNNQK.I** 5907 5909 5910 |
|  | 5973 | **716.30** | **2145.89** | **2146.05** | **-0.16** | **0** | **43** | **0.00048** | **1** | **1.789** | **1.351** | **1.509** | **1.242** | **0.613** | **1.457** | **K.VAQLEAQCQEPCK.D** |
|  | 6126 | **539.28** | **2153.08** | **2153.22** | **-0.14** | **0** | **20** | **0.52** | **1** | **---** | **---** | **---** | **---** | **---** | **---** | **R.LTIGEGQQHHLGGAK.Q** 6128 6131 |
|  | 6506 | **552.30** | **2205.18** | **2205.37** | **-0.18** | **0** | **29** | **0.079** | **1** | **---** | **---** | **---** | **---** | **---** | **---** | **K.QSGLYFIKPLK.A** 6508 6509 6511 6512 6514 6517 |
|  | 6856 | **573.58** | **2290.30** | **2290.36** | **-0.06** | **0** | **(42)** | **0.0037** | **1** | **---** | **---** | **---** | **---** | **---** | **---** | **K.IHLISTQSAIPYALR.V** 6853 6854 |
|  | 7974 | **628.37** | **2509.44** | **2509.57** | **-0.13** | **0** | **(7)** | **13** | **1** | **---** | **---** | **---** | **---** | **---** | **---** | **K.QSGLYFIKPLK.A** 7976 |
|  | 9510 | **744.39** | **2973.52** | **2973.58** | **-0.05** | **1** | **1** | **43** | **6** | **---** | **---** | **---** | **---** | **---** | **---** | **K.MLEEIMKYEASILTHDSSIR.Y** 9508 9511 |
|  | 9706 | **1001.76** | **3002.27** | **3002.41** | **-0.14** | **0** | **65** | **2.2e-006** | **1** | **1.248** | **1.202** | **1.495** | **1.297** | **0.788** | **1.127** | **R.FGSYCPTTCGIADFLSTYQTK.V** 9707 9708 9709 9710 9711 |
|  | 10371 | **858.94** | **3431.73** | **3431.87** | **-0.14** | **0** | **(20)** | **0.48** | **1** | **---** | **---** | **---** | **---** | **---** | **---** | **K.AIQLTYNPDESSKPNMIDAATLK.S** |
|  | 10417 | **862.93** | **3447.69** | **3447.87** | **-0.18** | **0** | **38** | **0.0068** | **1** | **0.650** | **0.988** | **0.798** | **0.864** | **0.982** | **0.975** | **K.AIQLTYNPDESSKPNMIDAATLK.S** 10418 10419 10420 10421 10423 |
|  | 10573 | **732.56** | **3657.77** | **3657.88** | **-0.10** | **1** | **3** | **17** | **1** | **---** | **---** | **---** | **---** | **---** | **---** | **K.VAQLEAQCQEPCKDTVQIHDITGK.D** |

  


---

|  |  |
| --- | --- |
| **13.** | P02774    **Mass:** 67906    **Score:** 704    **Queries matched:** 89   **emPAI:** 0.63 |
|  | Vitamin D-binding protein OS=Homo sapiens GN=GC PE=1 SV=1 |

|  |  |  |  |  |  |
| --- | --- | --- | --- | --- | --- |
|  | **Quantitation:** | **Ratio** | **Weighted** | **N** | **SD(geo)** |
|  |  | Patient3-Art/Control | 1.013 | 20 | NN |
|  |  | **Patient3-Porta/Control** | **1.114** | **19** | **1.349** |
|  |  | Patient3-Hepa/Control | 1.050 | 20 | NN |
|  |  | Patient2-Art/Control | 0.990 | 20 | 1.216 |
|  |  | Patient2-Porta/Control | 0.987 | 20 | NN |
|  |  | Patient2-Hepa/Control | 0.967 | 20 | 1.381 |

|  |  |  |  |  |  |  |  |  |  |  |  |  |  |  |  |  |
| --- | --- | --- | --- | --- | --- | --- | --- | --- | --- | --- | --- | --- | --- | --- | --- | --- |
|  | **Query** | **Observed** | **Mr(expt)** | **Mr(calc)** | **Delta** | **Miss** | **Score** | **Expect** | **Rank** | **Patient3-Art/Control** | **Patient3-Porta/Control** | **Patient3-Hepa/Control** | **Patient2-Art/Control** | **Patient2-Porta/Control** | **Patient2-Hepa/Control** | **Peptide** |
|  | 1460 | **568.31** | **1134.60** | **1134.76** | **-0.16** | **0** | **25** | **0.16** | **1** | **---** | **---** | **---** | **---** | **---** | **---** | **K.GPLLK.K** 1459 1462 1463 1464 1465 1466 1467 1468 1469 1470 1471 1472 1473 1474 1475 1476 1477 1478 1479 1480 1481 1482 1483 1484 1485 1486 1487 1488 1492 |
|  | 2098 | **610.30** | **1218.59** | **1218.66** | **-0.06** | **0** | **23** | **0.23** | **1** | **---** | **---** | **---** | **---** | **---** | **---** | **K.YTFELSR.R** 2099 2100 2101 |
|  | 2386 | **648.34** | **1294.67** | **1294.84** | **-0.17** | **0** | **17** | **1.3** | **1** | **---** | **---** | **---** | **---** | **---** | **---** | **R.LSNLIK.L** 2387 |
|  | 2887 | **704.41** | **1406.80** | **1406.90** | **-0.09** | **0** | **24** | **0.27** | **1** | **---** | **---** | **---** | **---** | **---** | **---** | **K.VLEPTLK.S** 2879 2881 2882 2889 2890 2891 2892 2893 2894 2895 2896 2897 2898 |
|  | 3463 | **520.30** | **1557.89** | **1557.91** | **-0.03** | **0** | **17** | **1.6** | **1** | **---** | **---** | **---** | **---** | **---** | **---** | **K.HLSLLTTLSNR.V** |
|  | 4598 | **612.68** | **1835.01** | **1835.10** | **-0.09** | **1** | **4** | **31** | **1** | **---** | **---** | **---** | **---** | **---** | **---** | **R.KLCMAALK.H** |
|  | 5066 | **645.69** | **1934.04** | **1934.16** | **-0.12** | **1** | **19** | **1** | **1** | **---** | **---** | **---** | **---** | **---** | **---** | **R.RTHLPEVFLSK.V** |
|  | 5358 | **666.36** | **1996.04** | **1996.09** | **-0.05** | **1** | **15** | **1.9** | **1** | **---** | **---** | **---** | **---** | **---** | **---** | **K.VMDKYTFELSR.R** |
|  | 5424 | **671.65** | **2011.93** | **2012.09** | **-0.15** | **1** | **(12)** | **2.1** | **1** | **---** | **---** | **---** | **---** | **---** | **---** | **K.VMDKYTFELSR.R** 5425 5426 |
|  | 7135 | **779.06** | **2334.15** | **2334.12** | **0.02** | **1** | **4** | **19** | **1** | **---** | **---** | **---** | **---** | **---** | **---** | **K.NSKFEDCCQEK.T** |
|  | 8429 | **652.61** | **2606.40** | **2606.52** | **-0.12** | **1** | **54** | **0.00026** | **1** | **1.080** | **1.245** | **1.105** | **0.960** | **1.265** | **0.984** | **R.KFPSGTFEQVSQLVK.E** 8426 8427 8430 8431 |
|  | 8550 | **890.04** | **2667.10** | **2667.13** | **-0.03** | **0** | **6** | **1.5** | **1** | **---** | **---** | **---** | **---** | **---** | **---** | **K.SLGECCDVEDSTTCFNAK.G** |
|  | 9413 | **733.37** | **2929.44** | **2929.35** | **0.09** | **0** | **0** | **43** | **4** | **---** | **---** | **---** | **---** | **---** | **---** | **K.SYLSMVGSCCTSASPTVCFLK.E** |
|  | 9523 | **992.22** | **2973.63** | **2973.67** | **-0.05** | **0** | **85** | **2e-007** | **1** | **1.106** | **1.253** | **1.152** | **0.941** | **0.831** | **0.965** | **K.VPTADLEDVLPLAEDITNILSK.C** 9503 9504 9505 9506 9507 9508 9509 9510 9511 9512 9513 9514 9515 9516 9517 9518 9519 9520 9521 9522 |
|  | 9700 | **1000.74** | **2999.19** | **2999.37** | **-0.18** | **0** | **82** | **1.2e-008** | **1** | **0.767** | **0.680** | **0.683** | **0.777** | **0.860** | **0.586** | **K.HQPQEFPTYVEPTNDEICEAFR.K** 9702 9703 |

  


---

|  |  |
| --- | --- |
| **14.** | P02766    **Mass:** 18707    **Score:** 656    **Queries matched:** 68   **emPAI:** 4.48 |
|  | Transthyretin OS=Homo sapiens GN=TTR PE=1 SV=1 |

|  |  |  |  |  |  |
| --- | --- | --- | --- | --- | --- |
|  | **Quantitation:** | **Ratio** | **Weighted** | **N** | **SD(geo)** |
|  |  | Patient3-Art/Control | 0.942 | 24 | 1.246 |
|  |  | Patient3-Porta/Control | 1.038 | 25 | NN |
|  |  | Patient3-Hepa/Control | 0.945 | 25 | 1.395 |
|  |  | Patient2-Art/Control | 0.946 | 25 | NN |
|  |  | Patient2-Porta/Control | 0.968 | 23 | NN |
|  |  | **Patient2-Hepa/Control** | **0.896** | **23** | **1.264** |

|  |  |  |  |  |  |  |  |  |  |  |  |  |  |  |  |  |
| --- | --- | --- | --- | --- | --- | --- | --- | --- | --- | --- | --- | --- | --- | --- | --- | --- |
|  | **Query** | **Observed** | **Mr(expt)** | **Mr(calc)** | **Delta** | **Miss** | **Score** | **Expect** | **Rank** | **Patient3-Art/Control** | **Patient3-Porta/Control** | **Patient3-Hepa/Control** | **Patient2-Art/Control** | **Patient2-Porta/Control** | **Patient2-Hepa/Control** | **Peptide** |
|  | 526 | **488.79** | **975.57** | **975.60** | **-0.03** | **0** | **31** | **0.027** | **1** | **1.360** | **1.090** | **1.139** | **1.766** | **1.227** | **0.975** | **K.VLDAVR.G** 506 507 508 509 510 511 512 513 514 515 517 518 519 520 521 522 523 524 525 528 529 531 |
|  | 2699 | **680.84** | **1359.67** | **1359.75** | **-0.09** | **0** | **11** | **4.3** | **1** | **---** | **---** | **---** | **---** | **---** | **---** | **K.CPLMVK.V** 2697 2700 |
|  | 3904 | **557.63** | **1669.86** | **1669.96** | **-0.10** | **0** | **71** | **5.3e-006** | **1** | **0.950** | **1.129** | **1.019** | **0.974** | **1.100** | **0.989** | **R.GSPAINVAVHVFR.K** 3902 3903 3905 3906 3907 3908 3910 3911 3913 3915 3916 3917 3918 3920 3921 3922 3923 3924 3925 3926 3928 3929 3930 3931 3932 |
|  | 5373 | **668.31** | **2001.90** | **2002.03** | **-0.13** | **0** | **45** | **0.00084** | **1** | **1.297** | **1.040** | **1.257** | **1.078** | **1.174** | **0.634** | **K.AADDTWEPFASGK.T** 5375 5378 |
|  | 7487 | **812.45** | **2434.34** | **2434.33** | **0.02** | **1** | **52** | **0.00038** | **1** | **2.964** | **3.323** | **2.000** | **2.344** | **1.736** | **0.887** | **R.KAADDTWEPFASGK.T** 7480 7486 |
|  | 9893 | **1033.20** | **3096.59** | **3096.68** | **-0.10** | **1** | **48** | **0.00085** | **1** | **1.371** | **1.501** | **1.665** | **1.505** | **0.966** | **1.391** | **R.YTIAALLSPYSYSTTAVVTNPKE.-** 9891 9892 9894 9895 9896 9897 |
|  | 10224 | **814.18** | **3252.71** | **3252.79** | **-0.08** | **2** | **19** | **0.79** | **1** | **---** | **---** | **---** | **---** | **---** | **---** | **R.RYTIAALLSPYSYSTTAVVTNPKE.-** |
|  | 10505 | **890.27** | **3557.05** | **3556.99** | **0.06** | **2** | **(14)** | **1.8** | **1** | **---** | **---** | **---** | **---** | **---** | **---** | **R.RYTIAALLSPYSYSTTAVVTNPKE.-** 10503 |

  


---

|  |  |
| --- | --- |
| **15.** | P00751    **Mass:** 103009   **Score:** 584    **Queries matched:** 42   **emPAI:** 0.38 |
|  | Complement factor B OS=Homo sapiens GN=CFB PE=1 SV=2 |

|  |  |  |  |  |  |
| --- | --- | --- | --- | --- | --- |
|  | **Quantitation:** | **Ratio** | **Weighted** | **N** | **SD(geo)** |
|  |  | **Patient3-Art/Control** | **1.144** | **16** | **1.273** |
|  |  | Patient3-Porta/Control | 0.949 | 18 | 1.544 |
|  |  | Patient3-Hepa/Control | 0.985 | 18 | NN |
|  |  | **Patient2-Art/Control** | **0.998** | **16** | **1.283** |
|  |  | **Patient2-Porta/Control** | **1.035** | **17** | **1.299** |
|  |  | Patient2-Hepa/Control | 0.799 | 16 | 1.443 |

|  |  |  |  |  |  |  |  |  |  |  |  |  |  |  |  |  |
| --- | --- | --- | --- | --- | --- | --- | --- | --- | --- | --- | --- | --- | --- | --- | --- | --- |
|  | **Query** | **Observed** | **Mr(expt)** | **Mr(calc)** | **Delta** | **Miss** | **Score** | **Expect** | **Rank** | **Patient3-Art/Control** | **Patient3-Porta/Control** | **Patient3-Hepa/Control** | **Patient2-Art/Control** | **Patient2-Porta/Control** | **Patient2-Hepa/Control** | **Peptide** |
|  | 2680 | **677.34** | **1352.67** | **1352.71** | **-0.04** | **0** | **63** | **4.5e-005** | **1** | **2.120** | **0.593** | **2.012** | **1.357** | **1.816** | **2.643** | **K.LQDEDLGFL.-** 2681 |
|  | 3860 | **553.95** | **1658.83** | **1658.93** | **-0.10** | **0** | **32** | **0.032** | **1** | **0.693** | **1.063** | **1.309** | **0.654** | **1.033** | **0.443** | **K.ALFVSEEEK.K** |
|  | 4298 | **588.66** | **1762.97** | **1763.03** | **-0.06** | **0** | **45** | **0.0019** | **1** | **0.857** | **0.880** | **0.989** | **0.608** | **0.586** | **0.983** | **K.EELLPAQDIK.A** 4297 4299 |
|  | 4732 | **617.71** | **1850.10** | **1850.11** | **-0.00** | **1** | **42** | **0.0041** | **1** | **1.224** | **0.902** | **0.968** | **1.050** | **1.106** | **0.702** | **K.VKDISEVVTPR.F** 4723 4724 4726 4727 4728 4729 4730 4731 |
|  | 4997 | **638.98** | **1913.93** | **1914.06** | **-0.12** | **1** | **49** | **0.00062** | **1** | **1.079** | **1.632** | **0.992** | **1.042** | **0.742** | **1.344** | **K.EKLQDEDLGFL.-** 4998 4999 |
|  | 5682 | **698.04** | **2091.10** | **2091.23** | **-0.14** | **1** | **26** | **0.17** | **1** | **---** | **---** | **---** | **---** | **---** | **---** | **K.ALFVSEEEKK.L** |
|  | 7504 | **817.73** | **2450.17** | **2450.32** | **-0.15** | **0** | **46** | **0.00099** | **1** | **1.205** | **1.382** | **1.041** | **1.039** | **0.948** | **0.909** | **K.EAGIPEFYDYDVALIK.L** 7506 7507 7512 7513 7515 |
|  | 9946 | **1036.83** | **3107.48** | **3107.54** | **-0.06** | **0** | **65** | **1.1e-005** | **1** | **0.351** | **1.275** | **0.923** | **1.452** | **0.434** | **1.771** | **R.LLQEGQALEYVCPSGFYPYPVQTR.T** 9929 9930 9931 9933 9934 9935 9936 9937 9939 9940 9941 9942 9943 9944 9945 |
|  | 10338 | **853.91** | **3411.62** | **3411.75** | **-0.13** | **0** | **(12)** | **1.9** | **1** | **---** | **---** | **---** | **---** | **---** | **---** | **R.LLQEGQALEYVCPSGFYPYPVQTR.T** |

  


---

|  |  |
| --- | --- |
| **16.** | P04217    **Mass:** 58349    **Score:** 484    **Queries matched:** 107   **emPAI:** 1.89 |
|  | Alpha-1B-glycoprotein OS=Homo sapiens GN=A1BG PE=1 SV=3 |

|  |  |  |  |  |  |
| --- | --- | --- | --- | --- | --- |
|  | **Quantitation:** | **Ratio** | **Weighted** | **N** | **SD(geo)** |
|  |  | **Patient3-Art/Control** | **1.241** | **25** | **1.198** |
|  |  | Patient3-Porta/Control | 1.272 | 25 | NN |
|  |  | **Patient3-Hepa/Control** | **1.095** | **25** | **1.279** |
|  |  | Patient2-Art/Control | 1.051 | 25 | NN |
|  |  | Patient2-Porta/Control | 0.933 | 25 | NN |
|  |  | **Patient2-Hepa/Control** | **0.875** | **25** | **1.224** |

|  |  |  |  |  |  |  |  |  |  |  |  |  |  |  |  |  |
| --- | --- | --- | --- | --- | --- | --- | --- | --- | --- | --- | --- | --- | --- | --- | --- | --- |
|  | **Query** | **Observed** | **Mr(expt)** | **Mr(calc)** | **Delta** | **Miss** | **Score** | **Expect** | **Rank** | **Patient3-Art/Control** | **Patient3-Porta/Control** | **Patient3-Hepa/Control** | **Patient2-Art/Control** | **Patient2-Porta/Control** | **Patient2-Hepa/Control** | **Peptide** |
|  | 262 | **455.26** | **908.51** | **908.58** | **-0.06** | **0** | **16** | **1.3** | **1** | **---** | **---** | **---** | **---** | **---** | **---** | **R.FALVR.E** 260 261 263 264 265 266 267 268 269 270 271 272 273 274 275 |
|  | 823 | **515.79** | **1029.57** | **1029.65** | **-0.08** | **0** | **38** | **0.0079** | **1** | **1.602** | **1.128** | **1.429** | **1.330** | **0.984** | **1.112** | **K.ELLVPR.S** 821 824 825 826 827 828 829 830 831 832 833 834 835 836 837 839 840 841 842 |
|  | 950 | **527.25** | **1052.49** | **1052.54** | **-0.05** | **0** | **23** | **0.3** | **1** | **---** | **---** | **---** | **---** | **---** | **---** | **R.SSTSPDR.I** 951 952 953 956 957 958 959 |
|  | 1311 | **555.30** | **1108.58** | **1108.69** | **-0.11** | **0** | **45** | **0.0023** | **1** | **1.122** | **1.167** | **1.130** | **1.083** | **0.999** | **0.875** | **R.GVTFLLR.R** 1310 1312 1313 1314 1319 1323 1325 1326 1327 1337 1338 |
|  | 2323 | **640.35** | **1278.68** | **1278.67** | **0.00** | **0** | **19** | **0.87** | **1** | **---** | **---** | **---** | **---** | **---** | **---** | **R.CLAPLEGAR.F** 2319 2320 |
|  | 2848 | **696.86** | **1391.71** | **1391.78** | **-0.07** | **0** | **35** | **0.016** | **1** | **5.031** | **8.113** | **4.081** | **4.978** | **2.693** | **3.665** | **R.ATWSGAVLAGR.D** 2847 2849 |
|  | 3178 | **739.92** | **1477.82** | **1477.93** | **-0.11** | **0** | **32** | **0.039** | **1** | **1.767** | **0.875** | **1.466** | **1.181** | **1.001** | **0.711** | **K.LLELTGPK.S** 3181 |
|  | 3967 | **559.62** | **1675.82** | **1675.89** | **-0.07** | **0** | **40** | **0.0058** | **1** | **0.964** | **0.515** | **0.222** | **0.229** | **0.227** | **0.590** | **K.HQFLLTGDTQGR.Y** 3968 |
|  | 4702 | **615.97** | **1844.90** | **1845.05** | **-0.15** | **0** | **12** | **3.4** | **1** | **---** | **---** | **---** | **---** | **---** | **---** | **R.LETPDFQLFK.N** |
|  | 5106 | **646.99** | **1937.96** | **1937.99** | **-0.03** | **0** | **60** | **5.8e-005** | **1** | **0.844** | **1.019** | **0.555** | **0.500** | **0.792** | **0.624** | **R.CEGPIPDVTFELLR.E** 5092 5093 5096 5097 5098 5100 5101 5108 |
|  | 5457 | **507.77** | **2027.06** | **2027.16** | **-0.10** | **0** | **20** | **0.63** | **1** | **---** | **---** | **---** | **---** | **---** | **---** | **R.LELHVDGPPPRPQLR.A** 5455 5458 5459 5460 5461 5462 |
|  | 6191 | **723.73** | **2168.16** | **2168.16** | **-0.01** | **0** | **54** | **0.00025** | **1** | **0.955** | **1.073** | **1.439** | **0.842** | **0.876** | **0.892** | **K.VTLTCVAPLSGVDFQLR.R** 6173 6176 6179 6182 6185 6186 6189 6192 |
|  | 8302 | **867.45** | **2599.33** | **2599.38** | **-0.05** | **0** | **(15)** | **1.9** | **1** | **---** | **---** | **---** | **---** | **---** | **---** | **R.TPGAAANLELIFVGPQHAGNYR.C** |
|  | 8845 | **920.56** | **2758.64** | **2758.57** | **0.07** | **0** | **(32)** | **0.03** | **1** | **2.236** | **1.655** | **1.751** | **1.378** | **1.225** | **1.593** | **K.SLPAPWLSMAPVSWITPGLK.T** |
|  | 8895 | **925.78** | **2774.31** | **2774.40** | **-0.09** | **0** | **7** | **7.2** | **1** | **---** | **---** | **---** | **---** | **---** | **---** | **R.SWVPHTFESELSDPVELLVAES.-** |
|  | 8901 | **925.83** | **2774.47** | **2774.57** | **-0.09** | **0** | **52** | **0.00043** | **1** | **0.779** | **1.392** | **1.475** | **0.942** | **1.093** | **0.533** | **K.SLPAPWLSMAPVSWITPGLK.T** 8898 8899 8900 8902 |
|  | 9373 | **726.86** | **2903.41** | **2903.59** | **-0.17** | **0** | **60** | **3.8e-005** | **1** | **---** | **---** | **---** | **---** | **---** | **---** | **R.TPGAAANLELIFVGPQHAGNYR.C** 9375 9376 9379 9380 9382 9383 |

  


---

|  |  |
| --- | --- |
| **17.** | P01008    **Mass:** 64497    **Score:** 402    **Queries matched:** 60   **emPAI:** 0.57 |
|  | Antithrombin-III OS=Homo sapiens GN=SERPINC1 PE=1 SV=1 |

|  |  |  |  |  |  |
| --- | --- | --- | --- | --- | --- |
|  | **Quantitation:** | **Ratio** | **Weighted** | **N** | **SD(geo)** |
|  |  | Patient3-Art/Control | 1.156 | 11 | 1.295 |
|  |  | Patient3-Porta/Control | 1.137 | 10 | 1.462 |
|  |  | Patient3-Hepa/Control | 1.213 | 11 | 1.384 |
|  |  | Patient2-Art/Control | 0.977 | 10 | 1.699 |
|  |  | Patient2-Porta/Control | 0.866 | 12 | 1.380 |
|  |  | **Patient2-Hepa/Control** | **0.896** | **7** | **1.078** |

|  |  |  |  |  |  |  |  |  |  |  |  |  |  |  |  |  |
| --- | --- | --- | --- | --- | --- | --- | --- | --- | --- | --- | --- | --- | --- | --- | --- | --- |
|  | **Query** | **Observed** | **Mr(expt)** | **Mr(calc)** | **Delta** | **Miss** | **Score** | **Expect** | **Rank** | **Patient3-Art/Control** | **Patient3-Porta/Control** | **Patient3-Hepa/Control** | **Patient2-Art/Control** | **Patient2-Porta/Control** | **Patient2-Hepa/Control** | **Peptide** |
|  | 1849 | **594.33** | **1186.65** | **1186.72** | **-0.06** | **0** | **12** | **5** | **1** | **---** | **---** | **---** | **---** | **---** | **---** | **R.LFGDK.S** 1848 1850 |
|  | 2444 | **654.36** | **1306.70** | **1306.77** | **-0.07** | **0** | **16** | **1.1** | **1** | **---** | **---** | **---** | **---** | **---** | **---** | **K.ELFYK.A** 2439 2440 2442 2443 2445 2452 2454 |
|  | 3379 | **512.95** | **1535.84** | **1535.92** | **-0.09** | **0** | **18** | **1.2** | **1** | **---** | **---** | **---** | **---** | **---** | **---** | **K.ANRPFLVFIR.E** 3384 |
|  | 4108 | **855.47** | **1708.93** | **1708.95** | **-0.02** | **0** | **28** | **0.1** | **1** | **---** | **---** | **---** | **---** | **---** | **---** | **R.EVPLNTIIFMGR.V** 4100 4101 4102 4103 4105 4106 4109 4111 |
|  | 4200 | **578.94** | **1733.79** | **1733.79** | **-0.00** | **0** | **18** | **0.53** | **1** | **---** | **---** | **---** | **---** | **---** | **---** | **R.DIPMNPMCIYR.S** |
|  | 5011 | **639.98** | **1916.91** | **1917.01** | **-0.10** | **0** | **52** | **0.00027** | **1** | **1.618** | **0.804** | **1.308** | **1.417** | **0.885** | **1.052** | **R.DDLYVSDAFHK.A** 5012 |
|  | 5139 | **650.34** | **1948.00** | **1948.07** | **-0.07** | **0** | **26** | **0.16** | **1** | **---** | **---** | **---** | **---** | **---** | **---** | **K.TSDQIHFFFAK.L** |
|  | 5485 | **680.36** | **2038.05** | **2038.19** | **-0.15** | **0** | **41** | **0.0049** | **1** | **1.900** | **1.774** | **1.582** | **1.845** | **1.160** | **1.720** | **R.VAEGTQVLELPFK.G** |
|  | 6684 | **556.30** | **2221.17** | **2221.21** | **-0.05** | **0** | **(14)** | **2.7** | **1** | **---** | **---** | **---** | **---** | **---** | **---** | **R.DDLYVSDAFHK.A** |
|  | 6842 | **761.70** | **2282.09** | **2282.25** | **-0.16** | **1** | **28** | **0.058** | **1** | **---** | **---** | **---** | **---** | **---** | **---** | **K.LQPLDFKENAEQSR.A** |
|  | 7705 | **825.07** | **2472.19** | **2472.30** | **-0.12** | **0** | **54** | **0.00016** | **1** | **0.763** | **0.592** | **1.158** | **0.168** | **0.806** | **0.885** | **K.EQLQDMGLVDLFSPEK.S** 7702 7703 7704 7706 7707 7708 7709 7710 |
|  | 8259 | **865.77** | **2594.29** | **2594.35** | **-0.06** | **0** | **72** | **2.9e-006** | **1** | **1.155** | **0.445** | **2.303** | **1.358** | **1.360** | **0.884** | **K.AFLEVNEEGSEAAASTAVVIAGR.S** 8237 8238 8248 8249 8250 8255 8256 8257 8258 8263 8264 8266 8269 8270 8272 8273 8276 8278 8283 8284 8287 |

  


---

|  |  |
| --- | --- |
| **18.** | P06727    **Mass:** 54193    **Score:** 305    **Queries matched:** 24   **emPAI:** 0.58 |
|  | Apolipoprotein A-IV OS=Homo sapiens GN=APOA4 PE=1 SV=3 |

|  |  |  |  |  |  |
| --- | --- | --- | --- | --- | --- |
|  | **Quantitation:** | **Ratio** | **Weighted** | **N** | **SD(geo)** |
|  |  | **Patient3-Art/Control** | **0.769** | **9** | **1.132** |
|  |  | **Patient3-Porta/Control** | **0.932** | **9** | **1.128** |
|  |  | Patient3-Hepa/Control | 0.614 | 9 | NN |
|  |  | Patient2-Art/Control | 0.882 | 9 | 1.171 |
|  |  | **Patient2-Porta/Control** | **0.834** | **9** | **1.153** |
|  |  | **Patient2-Hepa/Control** | **0.820** | **9** | **1.200** |

|  |  |  |  |  |  |  |  |  |  |  |  |  |  |  |  |  |
| --- | --- | --- | --- | --- | --- | --- | --- | --- | --- | --- | --- | --- | --- | --- | --- | --- |
|  | **Query** | **Observed** | **Mr(expt)** | **Mr(calc)** | **Delta** | **Miss** | **Score** | **Expect** | **Rank** | **Patient3-Art/Control** | **Patient3-Porta/Control** | **Patient3-Hepa/Control** | **Patient2-Art/Control** | **Patient2-Porta/Control** | **Patient2-Hepa/Control** | **Peptide** |
|  | 2375 | **644.36** | **1286.70** | **1286.75** | **-0.05** | **0** | **46** | **0.0014** | **1** | **0.751** | **0.900** | **0.126** | **1.723** | **0.546** | **1.780** | **R.LAPLAEDVR.G** 2373 2374 2377 |
|  | 2906 | **704.88** | **1407.75** | **1407.77** | **-0.02** | **0** | **13** | **3.8** | **2** | **---** | **---** | **---** | **---** | **---** | **---** | **R.LEPYADQLR.T** 2900 2903 2904 2905 |
|  | 3500 | **521.64** | **1561.89** | **1561.87** | **0.01** | **1** | **19** | **0.87** | **1** | **---** | **---** | **---** | **---** | **---** | **---** | **K.IDQTVEELRR.S** |
|  | 3646 | **539.30** | **1614.89** | **1614.90** | **-0.02** | **0** | **63** | **3.3e-005** | **1** | **0.491** | **0.630** | **0.455** | **0.427** | **0.366** | **0.481** | **K.LVPFATELHER.L** 3645 3647 3648 |
|  | 5512 | **512.80** | **2047.18** | **2047.20** | **-0.03** | **1** | **60** | **6.5e-005** | **1** | **0.544** | **0.752** | **0.464** | **1.017** | **0.694** | **0.605** | **K.KLVPFATELHER.L** 5507 5511 5513 |
|  | 6404 | **728.42** | **2182.24** | **2182.20** | **0.04** | **0** | **6** | **16** | **1** | **---** | **---** | **---** | **---** | **---** | **---** | **K.LNHQLEGLTFQMK.K** |
|  | 6713 | **744.69** | **2231.05** | **2231.15** | **-0.10** | **0** | **31** | **0.028** | **1** | **0.821** | **1.316** | **0.873** | **1.202** | **0.825** | **1.042** | **K.SLAELGGHLDQQVEEFR.R** |
|  | 6725 | **748.38** | **2242.11** | **2242.24** | **-0.13** | **0** | **74** | **1.8e-006** | **1** | **0.923** | **0.816** | **0.669** | **0.905** | **1.034** | **0.751** | **K.SELTQQLNALFQDK.L** |
|  | 6732 | **749.43** | **2245.27** | **2245.29** | **-0.02** | **1** | **0** | **65** | **10** | **---** | **---** | **---** | **---** | **---** | **---** | **K.VNSFFSTFKEK.E** |
|  | 7298 | **597.82** | **2387.23** | **2387.25** | **-0.02** | **1** | **50** | **0.00062** | **1** | **1.161** | **1.002** | **0.626** | **0.709** | **1.030** | **1.295** | **K.SLAELGGHLDQQVEEFRR.R** |
|  | 7912 | **625.36** | **2497.41** | **2497.49** | **-0.08** | **2** | **0** | **60** | **2** | **---** | **---** | **---** | **---** | **---** | **---** | **K.LKEEIGKELEELR.A** |

  


---

|  |  |
| --- | --- |
| **19.** | P04196    **Mass:** 67319    **Score:** 298    **Queries matched:** 19   **emPAI:** 0.20 |
|  | Histidine-rich glycoprotein OS=Homo sapiens GN=HRG PE=1 SV=1 |

|  |  |  |  |  |  |
| --- | --- | --- | --- | --- | --- |
|  | **Quantitation:** | **Ratio** | **Weighted** | **N** | **SD(geo)** |
|  |  | Patient3-Art/Control | 0.878 | 6 | 1.876 |
|  |  | Patient3-Porta/Control | 0.951 | 6 | 1.491 |
|  |  | **Patient3-Hepa/Control** | **0.676** | **4** | **1.188** |
|  |  | Patient2-Art/Control | 0.967 | 6 | 1.301 |
|  |  | Patient2-Porta/Control | 1.155 | 5 | 14.885 |
|  |  | Patient2-Hepa/Control | 0.623 | 6 | 2.321 |

|  |  |  |  |  |  |  |  |  |  |  |  |  |  |  |  |  |
| --- | --- | --- | --- | --- | --- | --- | --- | --- | --- | --- | --- | --- | --- | --- | --- | --- |
|  | **Query** | **Observed** | **Mr(expt)** | **Mr(calc)** | **Delta** | **Miss** | **Score** | **Expect** | **Rank** | **Patient3-Art/Control** | **Patient3-Porta/Control** | **Patient3-Hepa/Control** | **Patient2-Art/Control** | **Patient2-Porta/Control** | **Patient2-Hepa/Control** | **Peptide** |
|  | 3429 | **517.66** | **1549.97** | **1549.98** | **-0.01** | **1** | **15** | **1.9** | **1** | **---** | **---** | **---** | **---** | **---** | **---** | **K.ALDLINKR.R** 3426 3427 3428 |
|  | 4877 | **628.68** | **1883.02** | **1883.06** | **-0.04** | **0** | **32** | **0.038** | **1** | **0.718** | **0.870** | **0.622** | **1.042** | **1.118** | **0.443** | **R.RPSEIVIGQCK.V** 4876 4878 |
|  | 5277 | **662.99** | **1985.94** | **1985.99** | **-0.05** | **0** | **71** | **3.4e-006** | **1** | **2.051** | **1.397** | **1.337** | **1.300** | **0.964** | **2.275** | **K.DSPVLIDFFEDTER.Y** 5273 5274 5276 5280 |
|  | 7448 | **811.72** | **2432.13** | **2432.29** | **-0.17** | **0** | **79** | **3.8e-007** | **1** | **0.884** | **1.139** | **0.764** | **1.024** | **1.212** | **0.446** | **R.ADLFYDVEALDLESPK.N** 7447 7449 7450 7451 7452 7453 |

  


---

|  |  |
| --- | --- |
| **20.** | P0C0L4    **Mass:** 217666   **Score:** 297    **Queries matched:** 40   **emPAI:** 0.12 |
|  | Complement C4-A OS=Homo sapiens GN=C4A PE=1 SV=1 |

|  |  |  |  |  |  |
| --- | --- | --- | --- | --- | --- |
|  | **Quantitation:** | **Ratio** | **Weighted** | **N** | **SD(geo)** |
|  |  | Patient3-Art/Control | 1.042 | 4 | 1.289 |
|  |  | Patient3-Porta/Control | 0.941 | 4 | 1.196 |
|  |  | Patient3-Hepa/Control | 0.766 | 5 | 1.231 |
|  |  | Patient2-Art/Control | 0.864 | 4 | 1.156 |
|  |  | Patient2-Porta/Control | 0.993 | 3 | 1.279 |
|  |  | Patient2-Hepa/Control | 0.979 | 4 | 1.170 |

|  |  |  |  |  |  |  |  |  |  |  |  |  |  |  |  |  |
| --- | --- | --- | --- | --- | --- | --- | --- | --- | --- | --- | --- | --- | --- | --- | --- | --- |
|  | **Query** | **Observed** | **Mr(expt)** | **Mr(calc)** | **Delta** | **Miss** | **Score** | **Expect** | **Rank** | **Patient3-Art/Control** | **Patient3-Porta/Control** | **Patient3-Hepa/Control** | **Patient2-Art/Control** | **Patient2-Porta/Control** | **Patient2-Hepa/Control** | **Peptide** |
|  | 488 | **484.24** | **966.48** | **966.53** | **-0.05** | **0** | **12** | **6.5** | **4** | **---** | **---** | **---** | **---** | **---** | **---** | **R.LPMMR.S** 485 486 487 489 490 493 494 |
|  | 558 | **491.80** | **981.58** | **981.59** | **-0.01** | **0** | **16** | **4.4** | **1** | **---** | **---** | **---** | **---** | **---** | **---** | **K.GSVFLR.N** 557 |
|  | 1945 | 601.38 | 1200.74 | 1200.68 | 0.05 | 0 | 14 | 2.4 | 2 | --- | --- | --- | --- | --- | --- | R.LSCPK.E 1927 1930 1931 1939 1940 1941 1943 |
|  | 2199 | **623.36** | **1244.70** | **1244.76** | **-0.05** | **0** | **7** | **10** | **6** | **---** | **---** | **---** | **---** | **---** | **---** | **R.LFETK.I** |
|  | 2374 | 644.34 | 1286.67 | 1286.67 | 0.00 | 0 | 0 | 48 | 8 | --- | --- | --- | --- | --- | --- | R.QGSFQGGFR.S |
|  | 5066 | 645.69 | 1934.04 | 1934.11 | -0.08 | 2 | 5 | 22 | 2 | --- | --- | --- | --- | --- | --- | K.GYMRIQQFRK.A |
|  | 5136 | **650.00** | **1946.98** | **1947.06** | **-0.07** | **0** | **18** | **0.86** | **1** | **---** | **---** | **---** | **---** | **---** | **---** | **R.GSFEFPVGDAVSK.V** 5134 5135 |
|  | 5168 | **651.36** | **1951.07** | **1951.20** | **-0.13** | **0** | **2** | **45** | **2** | **---** | **---** | **---** | **---** | **---** | **---** | **R.DFALLSLQVPLK.D** |
|  | 6195 | **543.08** | **2168.31** | **2168.26** | **0.05** | **0** | **40** | **0.0061** | **1** | **1.556** | **0.960** | **1.107** | **1.068** | **1.536** | **1.268** | **R.GPEVQLVAHSPWLK.D** 6194 |
|  | 8108 | **852.36** | **2554.05** | **2554.13** | **-0.07** | **0** | **34** | **0.0024** | **1** | **-0.002** | **-0.021** | **0.803** | **-0.022** | **0.000** | **0.000** | **R.AACAQLNDFLQEYGTQGCQV.-** 8106 8107 8109 |
|  | 8154 | **643.36** | **2569.42** | **2569.56** | **-0.14** | **1** | **39** | **0.0075** | **1** | **0.816** | **0.819** | **0.963** | **0.778** | **1.038** | **1.047** | **R.DFALLSLQVPLKDAK.S** |
|  | 8930 | **929.80** | **2786.38** | **2786.50** | **-0.12** | **0** | **92** | **2.6e-008** | **1** | **-363.057** | **-211.032** | **-399.677** | **-223.277** | **-69.243** | **-93.589** | **R.VTASDPLDTLGSEGALSPGGVASLLR.L** 8929 8931 8932 8933 8934 |
|  | 9228 | **720.36** | **2877.40** | **2877.58** | **-0.17** | **0** | **32** | **0.024** | **1** | **1.048** | **0.981** | **0.618** | **0.857** | **0.871** | **0.888** | **R.LTVAAPPSGGPGFLSIERPDSRPPR.V** |
|  | 10369 | **858.22** | **3428.86** | **3428.90** | **-0.03** | **0** | **1** | **42** | **1** | **---** | **---** | **---** | **---** | **---** | **---** | **K.ITPGKPYILTVPGHLDEMQLDIQAR.Y** |

  

|  |  |
| --- | --- |
|  | |
|  | **Proteins matching the same set of peptides:** |

|  |  |
| --- | --- |
|  | P0C0L5    **Mass:** 217642   **Score:** 297    **Queries matched:** 40 |
|  | Complement C4-B OS=Homo sapiens GN=C4B PE=1 SV=1 |

---

|  |  |
| --- | --- |
| **21.** | P08697    **Mass:** 60891    **Score:** 295    **Queries matched:** 7   **emPAI:** 0.15 |
|  | Alpha-2-antiplasmin OS=Homo sapiens GN=SERPINF2 PE=1 SV=3 |

|  |  |  |  |  |  |
| --- | --- | --- | --- | --- | --- |
|  | **Quantitation:** | **Ratio** | **Weighted** | **N** | **SD(geo)** |
|  |  | Patient3-Art/Control | 0.936 | 5 | 2.182 |
|  |  | Patient3-Porta/Control | 0.905 | 5 | 2.530 |
|  |  | Patient3-Hepa/Control | 0.793 | 5 | 1.765 |
|  |  | Patient2-Art/Control | 0.969 | 5 | 1.920 |
|  |  | Patient2-Porta/Control | 0.947 | 4 | 1.484 |
|  |  | Patient2-Hepa/Control | 0.887 | 5 | 2.600 |

|  |  |  |  |  |  |  |  |  |  |  |  |  |  |  |  |  |
| --- | --- | --- | --- | --- | --- | --- | --- | --- | --- | --- | --- | --- | --- | --- | --- | --- |
|  | **Query** | **Observed** | **Mr(expt)** | **Mr(calc)** | **Delta** | **Miss** | **Score** | **Expect** | **Rank** | **Patient3-Art/Control** | **Patient3-Porta/Control** | **Patient3-Hepa/Control** | **Patient2-Art/Control** | **Patient2-Porta/Control** | **Patient2-Hepa/Control** | **Peptide** |
|  | 7660 | **820.06** | **2457.15** | **2457.27** | **-0.13** | **0** | **38** | **0.0056** | **1** | **1.745** | **0.454** | **1.039** | **0.954** | **1.093** | **0.709** | **K.LVPPMEEDYPQFGSPK.-** 7661 7662 7663 |
|  | 9755 | **1015.17** | **3042.50** | **3042.61** | **-0.11** | **0** | **123** | **2.1e-011** | **1** | **0.772** | **0.839** | **0.680** | **0.822** | **1.063** | **0.642** | **K.HQMDLVATLSQLGLQELFQAPDLR.G** 9756 9757 |

  


---

|  |  |
| --- | --- |
| **22.** | P05155    **Mass:** 64430    **Score:** 292    **Queries matched:** 38   **emPAI:** 0.47 |
|  | Plasma protease C1 inhibitor OS=Homo sapiens GN=SERPING1 PE=1 SV=2 |

|  |  |  |  |  |  |
| --- | --- | --- | --- | --- | --- |
|  | **Quantitation:** | **Ratio** | **Weighted** | **N** | **SD(geo)** |
|  |  | Patient3-Art/Control | 0.998 | 10 | 1.364 |
|  |  | **Patient3-Porta/Control** | **1.267** | **10** | **1.275** |
|  |  | Patient3-Hepa/Control | 1.210 | 9 | 1.315 |
|  |  | Patient2-Art/Control | 1.072 | 10 | 1.325 |
|  |  | **Patient2-Porta/Control** | **0.946** | **10** | **1.499** |
|  |  | Patient2-Hepa/Control | 1.158 | 9 | 1.265 |

|  |  |  |  |  |  |  |  |  |  |  |  |  |  |  |  |  |
| --- | --- | --- | --- | --- | --- | --- | --- | --- | --- | --- | --- | --- | --- | --- | --- | --- |
|  | **Query** | **Observed** | **Mr(expt)** | **Mr(calc)** | **Delta** | **Miss** | **Score** | **Expect** | **Rank** | **Patient3-Art/Control** | **Patient3-Porta/Control** | **Patient3-Hepa/Control** | **Patient2-Art/Control** | **Patient2-Porta/Control** | **Patient2-Hepa/Control** | **Peptide** |
|  | 2954 | **710.86** | **1419.71** | **1419.79** | **-0.07** | **0** | **38** | **0.0067** | **1** | **0.837** | **1.065** | **1.491** | **1.087** | **0.804** | **1.331** | **R.LLDSLPSDTR.L** 2952 2953 2955 2956 2957 2958 2960 |
|  | 3224 | **745.40** | **1488.78** | **1488.90** | **-0.12** | **0** | **25** | **0.17** | **1** | **---** | **---** | **---** | **---** | **---** | **---** | **K.FQPTLLTLPR.I** 3222 3223 3226 3227 3228 3229 3231 3233 3234 3236 3237 3239 3240 |
|  | 3413 | **515.28** | **1542.83** | **1542.85** | **-0.02** | **0** | **6** | **23** | **1** | **---** | **---** | **---** | **---** | **---** | **---** | **R.MEPFHFK.N** |
|  | 4509 | **605.95** | **1814.84** | **1814.96** | **-0.13** | **0** | **21** | **0.32** | **1** | **---** | **---** | **---** | **---** | **---** | **---** | **K.DFTCVHQALK.G** 4510 |
|  | 4817 | **625.01** | **1872.00** | **1872.08** | **-0.08** | **0** | **45** | **0.0021** | **1** | **0.428** | **0.654** | **0.562** | **0.473** | **0.223** | **0.705** | **K.TNLESILSYPK.D** 4812 |
|  | 5037 | **642.72** | **1925.15** | **1925.22** | **-0.06** | **0** | **54** | **0.00028** | **1** | **0.731** | **0.901** | **0.873** | **0.702** | **0.409** | **0.799** | **R.LVLLNAIYLSAK.W** 5029 5033 5034 5035 5036 5038 5040 |
|  | 7701 | **618.86** | **2471.41** | **2471.47** | **-0.06** | **1** | **40** | **0.0062** | **1** | **1.046** | **1.389** | **1.196** | **1.229** | **1.212** | **1.287** | **K.KYPVAHFIDQTLK.A** 7700 |
|  | 10508 | **891.46** | **3561.82** | **3561.92** | **-0.10** | **0** | **8** | **9.2** | **1** | **---** | **---** | **---** | **---** | **---** | **---** | **K.VETNMAFSPFSIASLLTQVLLGAGENTK.T** |

  


---

|  |  |
| --- | --- |
| **23.** | P08603    **Mass:** 167416   **Score:** 283    **Queries matched:** 28   **emPAI:** 0.25 |
|  | Complement factor H OS=Homo sapiens GN=CFH PE=1 SV=4 |

|  |  |  |  |  |  |
| --- | --- | --- | --- | --- | --- |
|  | **Quantitation:** | **Ratio** | **Weighted** | **N** | **SD(geo)** |
|  |  | Patient3-Art/Control | 0.948 | 9 | 1.168 |
|  |  | Patient3-Porta/Control | 0.969 | 9 | 1.242 |
|  |  | **Patient3-Hepa/Control** | **0.860** | **8** | **1.165** |
|  |  | **Patient2-Art/Control** | **0.888** | **8** | **1.094** |
|  |  | Patient2-Porta/Control | 0.892 | 9 | NN |
|  |  | Patient2-Hepa/Control | 0.891 | 9 | 1.171 |

|  |  |  |  |  |  |  |  |  |  |  |  |  |  |  |  |  |
| --- | --- | --- | --- | --- | --- | --- | --- | --- | --- | --- | --- | --- | --- | --- | --- | --- |
|  | **Query** | **Observed** | **Mr(expt)** | **Mr(calc)** | **Delta** | **Miss** | **Score** | **Expect** | **Rank** | **Patient3-Art/Control** | **Patient3-Porta/Control** | **Patient3-Hepa/Control** | **Patient2-Art/Control** | **Patient2-Porta/Control** | **Patient2-Hepa/Control** | **Peptide** |
|  | 1989 | **602.33** | **1202.64** | **1202.66** | **-0.02** | **0** | **7** | **12** | **1** | **---** | **---** | **---** | **---** | **---** | **---** | **K.CLGEK.W** |
|  | 2730 | **456.61** | **1366.80** | **1366.79** | **0.01** | **0** | **45** | **0.002** | **1** | **0.965** | **1.526** | **0.686** | **1.062** | **1.009** | **1.154** | **K.IDVHLVPDR.K** |
|  | 2752 | **686.84** | **1371.66** | **1371.74** | **-0.08** | **0** | **4** | **18** | **4** | **---** | **---** | **---** | **---** | **---** | **---** | **R.ECELPK.I** 2749 2751 |
|  | 2999 | **475.24** | **1422.69** | **1422.69** | **-0.00** | **0** | **15** | **1.8** | **1** | **---** | **---** | **---** | **---** | **---** | **---** | **K.CLHPCVISR.E** |
|  | 3187 | **741.32** | **1480.63** | **1480.74** | **-0.11** | **0** | **8** | **3.9** | **1** | **---** | **---** | **---** | **---** | **---** | **---** | **K.CVEISCK.S** |
|  | 4081 | 570.34 | 1708.01 | 1707.91 | 0.11 | 0 | 0 | 70 | 10 | --- | --- | --- | --- | --- | --- | K.WSHPPSCIK.T |
|  | 4214 | **581.32** | **1740.95** | **1741.05** | **-0.10** | **0** | **23** | **0.37** | **1** | **---** | **---** | **---** | **---** | **---** | **---** | **R.RPYFPVAVGK.Y** |
|  | 4384 | **596.30** | **1785.86** | **1785.90** | **-0.04** | **0** | **17** | **1** | **1** | **---** | **---** | **---** | **---** | **---** | **---** | **K.LSYTCEGGFR.I** |
|  | 4738 | **619.63** | **1855.88** | **1856.01** | **-0.14** | **0** | **20** | **0.51** | **1** | **---** | **---** | **---** | **---** | **---** | **---** | **R.WQSIPLCVEK.I** |
|  | 5384 | **668.70** | **2003.08** | **2003.19** | **-0.11** | **0** | **50** | **0.00076** | **1** | **0.866** | **0.868** | **0.734** | **0.795** | **0.764** | **0.808** | **K.SSNLIILEEHLK.N** |
|  | 5505 | **512.29** | **2045.13** | **2045.26** | **-0.12** | **0** | **(5)** | **21** | **1** | **---** | **---** | **---** | **---** | **---** | **---** | **R.RPYFPVAVGK.Y** |
|  | 5664 | **693.68** | **2078.01** | **2078.08** | **-0.07** | **0** | **71** | **3.6e-006** | **1** | **0.551** | **0.994** | **0.569** | **0.823** | **0.680** | **1.676** | **K.CFEGFGIDGPAIAK.C** 5662 5663 |
|  | 5925 | **709.00** | **2123.98** | **2124.13** | **-0.15** | **0** | **34** | **0.012** | **1** | **0.925** | **0.923** | **0.958** | **0.857** | **0.923** | **0.791** | **K.SIDVACHPGYALPK.A** |
|  | 6958 | **772.04** | **2313.11** | **2313.14** | **-0.03** | **0** | **39** | **0.0053** | **1** | **1.101** | **2.161** | **1.892** | **-0.067** | **0.173** | **0.667** | **R.DTSCVNPPTVQNAYIVSR.Q** 6959 |
|  | 8459 | **874.76** | **2621.25** | **2621.30** | **-0.05** | **0** | **42** | **0.0025** | **1** | **1.230** | **0.750** | **1.018** | **1.070** | **0.858** | **1.087** | **K.TDCLSLPSFENAIPMGEK.K** 8455 8456 8457 8458 8460 8461 |
|  | 9387 | **728.88** | **2911.50** | **2911.50** | **-0.00** | **0** | **29** | **0.068** | **1** | **---** | **---** | **---** | **---** | **---** | **---** | **R.SITCIHGVWTQLPQCVAIDK.L** 9388 |

  


---

|  |  |
| --- | --- |
| **24.** | P02649    **Mass:** 40483    **Score:** 263    **Queries matched:** 23   **emPAI:** 0.50 |
|  | Apolipoprotein E OS=Homo sapiens GN=APOE PE=1 SV=1 |

|  |  |  |  |  |  |
| --- | --- | --- | --- | --- | --- |
|  | **Quantitation:** | **Ratio** | **Weighted** | **N** | **SD(geo)** |
|  |  | **Patient3-Art/Control** | **1.731** | **10** | **1.221** |
|  |  | **Patient3-Porta/Control** | **2.014** | **10** | **1.253** |
|  |  | **Patient3-Hepa/Control** | **1.758** | **11** | **1.332** |
|  |  | Patient2-Art/Control | 1.041 | 11 | 1.233 |
|  |  | Patient2-Porta/Control | 1.228 | 11 | 1.350 |
|  |  | Patient2-Hepa/Control | 1.143 | 11 | NN |

|  |  |  |  |  |  |  |  |  |  |  |  |  |  |  |  |  |
| --- | --- | --- | --- | --- | --- | --- | --- | --- | --- | --- | --- | --- | --- | --- | --- | --- |
|  | **Query** | **Observed** | **Mr(expt)** | **Mr(calc)** | **Delta** | **Miss** | **Score** | **Expect** | **Rank** | **Patient3-Art/Control** | **Patient3-Porta/Control** | **Patient3-Hepa/Control** | **Patient2-Art/Control** | **Patient2-Porta/Control** | **Patient2-Hepa/Control** | **Peptide** |
|  | 553 | **491.73** | **981.45** | **981.59** | **-0.14** | **0** | **7** | **22** | **2** | **---** | **---** | **---** | **---** | **---** | **---** | **R.LVQYR.G** |
|  | 1731 | **588.27** | **1174.52** | **1174.53** | **-0.01** | **0** | **7** | **8.7** | **1** | **---** | **---** | **---** | **---** | **---** | **---** | **R.MEEMGSR.T** |
|  | 1859 | **595.77** | **1189.53** | **1189.67** | **-0.14** | **0** | **15** | **1.2** | **2** | **---** | **---** | **---** | **---** | **---** | **---** | **K.ELQAAQAR.L** |
|  | 2215 | **626.84** | **1251.67** | **1251.72** | **-0.06** | **0** | **28** | **0.1** | **1** | **---** | **---** | **---** | **---** | **---** | **---** | **R.LAVYQAGAR.E** 2216 2217 2219 |
|  | 2618 | **669.34** | **1336.66** | **1336.74** | **-0.08** | **0** | **41** | **0.0044** | **1** | **2.107** | **2.226** | **1.546** | **1.470** | **0.986** | **1.531** | **R.LQAEAFQAR.L** 2617 2619 2620 2621 2623 2624 |
|  | 4461 | **601.33** | **1800.97** | **1801.00** | **-0.03** | **0** | **60** | **7.9e-005** | **1** | **1.283** | **1.179** | **1.040** | **1.820** | **0.486** | **1.550** | **R.AATVGSLAGQPLQER.A** 4459 4460 4462 |
|  | 6881 | **574.30** | **2293.16** | **2293.29** | **-0.12** | **2** | **36** | **0.015** | **1** | **1.596** | **2.221** | **1.926** | **0.860** | **1.162** | **0.682** | **R.DRLDEVKEQVAEVR.A** 6882 |
|  | 9749 | **1012.23** | **3033.66** | **3033.59** | **0.07** | **0** | **69** | **7.4e-006** | **1** | **0.940** | **1.216** | **2.176** | **0.461** | **1.729** | **0.443** | **R.WVQTLSEQVQEELLSSQVTQELR.A** 9747 9748 |

  


---

|  |  |
| --- | --- |
| **25.** | P01042    **Mass:** 88605    **Score:** 216    **Queries matched:** 33   **emPAI:** 0.53 |
|  | Kininogen-1 OS=Homo sapiens GN=KNG1 PE=1 SV=2 |

|  |  |  |  |  |  |
| --- | --- | --- | --- | --- | --- |
|  | **Quantitation:** | **Ratio** | **Weighted** | **N** | **SD(geo)** |
|  |  | **Patient3-Art/Control** | **1.584** | **7** | **1.254** |
|  |  | Patient3-Porta/Control | 1.676 | 7 | 1.337 |
|  |  | **Patient3-Hepa/Control** | **1.331** | **7** | **1.260** |
|  |  | Patient2-Art/Control | 1.376 | 7 | 1.190 |
|  |  | Patient2-Porta/Control | 1.140 | 7 | 1.438 |
|  |  | Patient2-Hepa/Control | 1.121 | 7 | 1.151 |

|  |  |  |  |  |  |  |  |  |  |  |  |  |  |  |  |  |
| --- | --- | --- | --- | --- | --- | --- | --- | --- | --- | --- | --- | --- | --- | --- | --- | --- |
|  | **Query** | **Observed** | **Mr(expt)** | **Mr(calc)** | **Delta** | **Miss** | **Score** | **Expect** | **Rank** | **Patient3-Art/Control** | **Patient3-Porta/Control** | **Patient3-Hepa/Control** | **Patient2-Art/Control** | **Patient2-Porta/Control** | **Patient2-Hepa/Control** | **Peptide** |
|  | 1562 | **572.24** | **1142.47** | **1142.54** | **-0.07** | **0** | **26** | **0.064** | **1** | **---** | **---** | **---** | **---** | **---** | **---** | **K.ICVGCPR.D** |
|  | 2449 | **654.38** | **1306.74** | **1306.77** | **-0.02** | **0** | **25** | **0.15** | **1** | **---** | **---** | **---** | **---** | **---** | **---** | **R.QVVAGLNFR.I** 2443 2445 2447 2448 2450 2453 |
|  | 2597 | **667.84** | **1333.67** | **1333.73** | **-0.07** | **0** | **29** | **0.093** | **1** | **---** | **---** | **---** | **---** | **---** | **---** | **K.YFIDFVAR.E** 2596 2598 |
|  | 2725 | **455.59** | **1363.76** | **1363.77** | **-0.01** | **0** | **16** | **1.5** | **1** | **---** | **---** | **---** | **---** | **---** | **---** | **K.RPPGFSPFR.S** 2724 |
|  | 3757 | **546.98** | **1637.93** | **1637.94** | **-0.01** | **0** | **(15)** | **1.9** | **1** | **---** | **---** | **---** | **---** | **---** | **---** | **K.YFIDFVAR.E** |
|  | 4293 | **588.31** | **1761.92** | **1761.92** | **0.00** | **0** | **33** | **0.033** | **1** | **1.340** | **2.069** | **1.597** | **1.078** | **0.975** | **1.041** | **K.AATGECTATVGK.R** 4292 |
|  | 4307 | **589.65** | **1765.92** | **1766.03** | **-0.12** | **1** | **30** | **0.068** | **1** | **---** | **---** | **---** | **---** | **---** | **---** | **K.KYFIDFVAR.E** 4306 4313 4317 |
|  | 4748 | **620.65** | **1858.92** | **1858.99** | **-0.07** | **0** | **15** | **2** | **1** | **---** | **---** | **---** | **---** | **---** | **---** | **K.TVGSDTFYSFK.Y** |
|  | 5252 | **660.98** | **1979.92** | **1980.03** | **-0.11** | **0** | **49** | **0.00045** | **1** | **1.582** | **1.592** | **1.440** | **1.101** | **0.791** | **1.319** | **K.ENFLFLTPDCK.S** 5253 |
|  | 8220 | **865.43** | **2593.27** | **2593.36** | **-0.09** | **0** | **41** | **0.004** | **1** | **0.906** | **0.712** | **1.331** | **0.844** | **0.576** | **0.998** | **K.IYPTVNCQPLGMISLMK.R** 8216 8219 8221 8222 8224 8225 8227 |
|  | 8798 | **687.59** | **2746.34** | **2746.49** | **-0.14** | **0** | **47** | **0.00087** | **1** | **1.967** | **2.070** | **1.457** | **1.723** | **1.436** | **1.211** | **R.DIPTNSPELEETLTHTITK.L** |
|  | 9744 | **757.38** | **3025.50** | **3025.66** | **-0.16** | **1** | **59** | **5.9e-005** | **1** | **0.843** | **0.901** | **0.769** | **0.880** | **0.865** | **0.737** | **K.KIYPTVNCQPLGMISLMK.R** |

  


---

|  |  |
| --- | --- |
| **26.** | Q14624    **Mass:** 116254   **Score:** 206    **Queries matched:** 47   **emPAI:** 0.29 |
|  | Inter-alpha-trypsin inhibitor heavy chain H4 OS=Homo sapiens GN=ITIH4 PE=1 SV=4 |

|  |  |  |  |  |  |
| --- | --- | --- | --- | --- | --- |
|  | **Quantitation:** | **Ratio** | **Weighted** | **N** | **SD(geo)** |
|  |  | **Patient3-Art/Control** | **0.885** | **8** | **1.097** |
|  |  | Patient3-Porta/Control | 1.087 | 8 | 1.233 |
|  |  | **Patient3-Hepa/Control** | **0.848** | **8** | **1.126** |
|  |  | **Patient2-Art/Control** | **0.835** | **8** | **1.111** |
|  |  | **Patient2-Porta/Control** | **0.762** | **8** | **1.116** |
|  |  | **Patient2-Hepa/Control** | **0.759** | **8** | **1.226** |

|  |  |  |  |  |  |  |  |  |  |  |  |  |  |  |  |  |
| --- | --- | --- | --- | --- | --- | --- | --- | --- | --- | --- | --- | --- | --- | --- | --- | --- |
|  | **Query** | **Observed** | **Mr(expt)** | **Mr(calc)** | **Delta** | **Miss** | **Score** | **Expect** | **Rank** | **Patient3-Art/Control** | **Patient3-Porta/Control** | **Patient3-Hepa/Control** | **Patient2-Art/Control** | **Patient2-Porta/Control** | **Patient2-Hepa/Control** | **Peptide** |
|  | 941 | **526.78** | **1051.54** | **1051.55** | **-0.01** | **0** | **35** | **0.02** | **1** | **1.101** | **1.432** | **0.888** | **0.761** | **1.044** | **1.005** | **R.LCVDPR.H** 929 930 931 932 933 934 935 936 937 938 939 940 942 943 944 945 |
|  | 1777 | **591.34** | **1180.67** | **1180.76** | **-0.09** | **0** | **11** | **5.4** | **1** | **---** | **---** | **---** | **---** | **---** | **---** | **R.EALIK.I** |
|  | 2133 | **616.83** | **1231.65** | **1231.71** | **-0.06** | **0** | **39** | **0.0068** | **1** | **0.845** | **0.573** | **0.627** | **0.614** | **0.577** | **0.716** | **K.ILDDLSPR.D** 2131 2132 2135 2136 |
|  | 2282 | 633.35 | 1264.69 | 1264.66 | 0.02 | 0 | 4 | 26 | 9 | --- | --- | --- | --- | --- | --- | K.MTMDK.T 2284 |
|  | 3392 | **771.44** | **1540.86** | **1540.94** | **-0.08** | **0** | **23** | **0.33** | **1** | **---** | **---** | **---** | **---** | **---** | **---** | **K.NVVFVIDK.S** 3393 |
|  | 3575 | **526.26** | **1575.75** | **1575.78** | **-0.03** | **0** | **45** | **0.0014** | **1** | **0.796** | **1.311** | **1.121** | **1.135** | **0.891** | **1.223** | **K.YIFHNFMER.L** |
|  | 4506 | **604.71** | **1811.12** | **1811.15** | **-0.03** | **1** | **11** | **4.4** | **1** | **---** | **---** | **---** | **---** | **---** | **---** | **R.RLGVYELLLK.V** 4507 |
|  | 7118 | **777.74** | **2330.19** | **2330.24** | **-0.05** | **0** | **65** | **1.7e-005** | **1** | **0.698** | **0.706** | **0.987** | **0.760** | **0.679** | **0.905** | **R.ANTVQEATFQMELPK.K** 7117 7119 7121 |
|  | 7746 | **622.81** | **2487.22** | **2487.30** | **-0.08** | **0** | **59** | **6.2e-005** | **1** | **0.778** | **1.129** | **0.818** | **0.809** | **0.913** | **0.523** | **R.QLGLPGPPDVPDHAAYHPFR.R** |
|  | 9355 | **966.52** | **2896.55** | **2896.57** | **-0.02** | **0** | **25** | **0.19** | **1** | **---** | **---** | **---** | **---** | **---** | **---** | **R.LPEGSVSLIILLTDGDPTVGETNPR.S** 9347 9349 9350 9351 9353 9354 |
|  | 10694 | **950.94** | **3799.73** | **3799.87** | **-0.14** | **0** | **16** | **0.42** | **1** | **---** | **---** | **---** | **---** | **---** | **---** | **R.SFAAGIQALGGTNINDAMLMAVQLLDSSNQEER.L** 10693 10695 10696 10697 |

  


---

|  |  |
| --- | --- |
| **27.** | P01834    **Mass:** 14477    **Score:** 199    **Queries matched:** 8   **emPAI:** 0.31 |
|  | Ig kappa chain C region OS=Homo sapiens GN=IGKC PE=1 SV=1 |

|  |  |  |  |  |  |
| --- | --- | --- | --- | --- | --- |
|  | **Quantitation:** | **Ratio** | **Weighted** | **N** | **SD(geo)** |
|  |  | **Patient3-Art/Control** | **0.577** | **5** | **1.307** |
|  |  | Patient3-Porta/Control | 0.631 | 5 | NN |
|  |  | Patient3-Hepa/Control | 0.707 | 5 | 1.533 |
|  |  | Patient2-Art/Control | 0.910 | 5 | 1.267 |
|  |  | Patient2-Porta/Control | 0.949 | 5 | 1.350 |
|  |  | Patient2-Hepa/Control | 1.027 | 5 | 1.299 |

|  |  |  |  |  |  |  |  |  |  |  |  |  |  |  |  |  |
| --- | --- | --- | --- | --- | --- | --- | --- | --- | --- | --- | --- | --- | --- | --- | --- | --- |
|  | **Query** | **Observed** | **Mr(expt)** | **Mr(calc)** | **Delta** | **Miss** | **Score** | **Expect** | **Rank** | **Patient3-Art/Control** | **Patient3-Porta/Control** | **Patient3-Hepa/Control** | **Patient2-Art/Control** | **Patient2-Porta/Control** | **Patient2-Hepa/Control** | **Peptide** |
|  | 8097 | **852.09** | **2553.24** | **2553.43** | **-0.19** | **0** | **66** | **1.1e-005** | **1** | **0.736** | **0.734** | **0.869** | **1.302** | **1.518** | **1.498** | **-.TVAAPSVFIFPPSDEQLK.S** 8098 8100 8101 8102 8103 8104 8105 |

  


---

|  |  |
| --- | --- |
| **28.** | Patient39823    **Mass:** 126842   **Score:** 196    **Queries matched:** 32   **emPAI:** 0.14 |
|  | Inter-alpha-trypsin inhibitor heavy chain H2 OS=Homo sapiens GN=ITIH2 PE=1 SV=2 |

|  |  |  |  |  |  |
| --- | --- | --- | --- | --- | --- |
|  | **Quantitation:** | **Ratio** | **Weighted** | **N** | **SD(geo)** |
|  |  | Patient3-Art/Control | 0.931 | 6 | 1.215 |
|  |  | Patient3-Porta/Control | 0.522 | 6 | 1.489 |
|  |  | Patient3-Hepa/Control | 0.875 | 6 | 1.545 |
|  |  | Patient2-Art/Control | 0.863 | 6 | 1.469 |
|  |  | Patient2-Porta/Control | 0.949 | 6 | 1.218 |
|  |  | Patient2-Hepa/Control | 0.896 | 6 | 1.990 |

|  |  |  |  |  |  |  |  |  |  |  |  |  |  |  |  |  |
| --- | --- | --- | --- | --- | --- | --- | --- | --- | --- | --- | --- | --- | --- | --- | --- | --- |
|  | **Query** | **Observed** | **Mr(expt)** | **Mr(calc)** | **Delta** | **Miss** | **Score** | **Expect** | **Rank** | **Patient3-Art/Control** | **Patient3-Porta/Control** | **Patient3-Hepa/Control** | **Patient2-Art/Control** | **Patient2-Porta/Control** | **Patient2-Hepa/Control** | **Peptide** |
|  | 1606 | **575.32** | **1148.63** | **1148.67** | **-0.04** | **0** | **12** | **2.6** | **6** | **---** | **---** | **---** | **---** | **---** | **---** | **K.TILDDLR.A** |
|  | 4916 | **629.68** | **1886.02** | **1886.05** | **-0.03** | **0** | **81** | **6.2e-007** | **1** | **1.430** | **1.165** | **1.660** | **1.341** | **1.880** | **3.568** | **K.IQPSGGTNINEALLR.A** 4917 |
|  | 6774 | **753.39** | **2257.16** | **2257.27** | **-0.11** | **0** | **39** | **0.0069** | **1** | **1.711** | **0.992** | **2.218** | **2.912** | **1.343** | **3.578** | **R.ETAVDGELVVLYDVK.R** 6755 6767 6768 6770 6772 6776 6777 6778 6780 6781 6783 6785 6787 6790 6791 6792 |
|  | 7495 | **814.14** | **2439.41** | **2439.45** | **-0.04** | **1** | **29** | **0.076** | **1** | **---** | **---** | **---** | **---** | **---** | **---** | **R.KLWAYLTINQLLAER.S** |
|  | 9116 | **713.11** | **2848.39** | **2848.54** | **-0.14** | **0** | **41** | **0.003** | **1** | **0.929** | **0.220** | **0.826** | **0.834** | **0.910** | **0.955** | **R.FLHVPDTFEGHFDGVPVISK.G** 9115 9118 9119 |
|  | 9504 | 992.17 | 2973.49 | 2973.37 | 0.12 | 0 | 5 | 16 | 9 | --- | --- | --- | --- | --- | --- | R.MLADAPPQDPSCCSGALYYGSK.V 9500 9501 9502 9503 9506 9507 |

  


---

|  |  |
| --- | --- |
| **29.** | P01871    **Mass:** 56824    **Score:** 195    **Queries matched:** 38   **emPAI:** 0.34 |
|  | Ig mu chain C region OS=Homo sapiens GN=IGHM PE=1 SV=3 |

|  |  |  |  |  |  |
| --- | --- | --- | --- | --- | --- |
|  | **Quantitation:** | **Ratio** | **Weighted** | **N** | **SD(geo)** |
|  |  | **Patient3-Art/Control** | **0.684** | **6** | **1.157** |
|  |  | Patient3-Porta/Control | 0.777 | 7 | 1.523 |
|  |  | Patient3-Hepa/Control | 0.723 | 7 | 1.624 |
|  |  | Patient2-Art/Control | 0.679 | 7 | NN |
|  |  | Patient2-Porta/Control | 0.651 | 7 | 1.502 |
|  |  | Patient2-Hepa/Control | 0.823 | 7 | 1.618 |

|  |  |  |  |  |  |  |  |  |  |  |  |  |  |  |  |  |
| --- | --- | --- | --- | --- | --- | --- | --- | --- | --- | --- | --- | --- | --- | --- | --- | --- |
|  | **Query** | **Observed** | **Mr(expt)** | **Mr(calc)** | **Delta** | **Miss** | **Score** | **Expect** | **Rank** | **Patient3-Art/Control** | **Patient3-Porta/Control** | **Patient3-Hepa/Control** | **Patient2-Art/Control** | **Patient2-Porta/Control** | **Patient2-Hepa/Control** | **Peptide** |
|  | 1131 | **540.29** | **1078.57** | **1078.64** | **-0.07** | **0** | **27** | **0.094** | **1** | **---** | **---** | **---** | **---** | **---** | **---** | **R.GFPSVLR.G** 1129 1130 1132 1133 1136 1138 1139 1141 1144 1145 |
|  | 2006 | **602.85** | **1203.69** | **1203.73** | **-0.04** | **0** | **31** | **0.04** | **1** | **0.305** | **0.686** | **0.423** | **0.482** | **0.475** | **0.424** | **K.VSVFVPPR.D** 2007 2008 2009 2010 2011 |
|  | 3395 | **771.89** | **1541.76** | **1541.80** | **-0.04** | **0** | **22** | **0.34** | **1** | **---** | **---** | **---** | **---** | **---** | **---** | **K.LICQATGFSPR.Q** 3394 3398 3399 3402 3403 |
|  | 5351 | **665.72** | **1994.14** | **1994.24** | **-0.10** | **0** | **52** | **0.00039** | **1** | **0.669** | **2.016** | **2.375** | **2.108** | **2.040** | **2.436** | **K.NVPLPVIAELPPK.V** 5348 5350 |
|  | 5655 | **520.30** | **2077.17** | **2077.21** | **-0.04** | **0** | **32** | **0.041** | **1** | **0.672** | **0.667** | **0.553** | **0.673** | **0.584** | **0.671** | **K.GVALHRPDVYLLPPAR.E** 5654 5658 |
|  | 6732 | 749.43 | 2245.27 | 2245.33 | -0.07 | 0 | 45 | 0.0023 | 1 | 0.804 | 0.828 | 0.991 | 0.535 | 0.683 | 0.939 | R.VFAIPPSFASIFLTK.S 6731 6733 6734 6735 |
|  | 6957 | **772.04** | **2313.09** | **2313.23** | **-0.15** | **0** | **6** | **8.1** | **1** | **---** | **---** | **---** | **---** | **---** | **---** | **R.FTCTVTHTDLPSPLK.Q** |
|  | 9103 | **711.85** | **2843.39** | **2843.58** | **-0.18** | **1** | **2** | **27** | **4** | **---** | **---** | **---** | **---** | **---** | **---** | **R.EGKQVGSGVTTDQVQAEAK.E** 9107 9108 |

  


---

|  |  |
| --- | --- |
| **30.** | Patient25311    **Mass:** 40423    **Score:** 153    **Queries matched:** 5   **emPAI:** 0.11 |
|  | Zinc-alpha-2-glycoprotein OS=Homo sapiens GN=AZGPatient3 PE=1 SV=1 |

|  |  |  |  |  |  |
| --- | --- | --- | --- | --- | --- |
|  | **Quantitation:** | **Ratio** | **Weighted** | **N** | **SD(geo)** |
|  |  | Patient3-Art/Control | --- | 2 | --- |
|  |  | Patient3-Porta/Control | --- | 2 | --- |
|  |  | Patient3-Hepa/Control | --- | 2 | --- |
|  |  | Patient2-Art/Control | --- | 2 | --- |
|  |  | Patient2-Porta/Control | --- | 2 | --- |
|  |  | Patient2-Hepa/Control | --- | 2 | --- |

|  |  |  |  |  |  |  |  |  |  |  |  |  |  |  |  |  |
| --- | --- | --- | --- | --- | --- | --- | --- | --- | --- | --- | --- | --- | --- | --- | --- | --- |
|  | **Query** | **Observed** | **Mr(expt)** | **Mr(calc)** | **Delta** | **Miss** | **Score** | **Expect** | **Rank** | **Patient3-Art/Control** | **Patient3-Porta/Control** | **Patient3-Hepa/Control** | **Patient2-Art/Control** | **Patient2-Porta/Control** | **Patient2-Hepa/Control** | **Peptide** |
|  | 5242 | **659.67** | **1976.00** | **1976.09** | **-0.09** | **1** | **12** | **3.7** | **1** | **---** | **---** | **---** | **---** | **---** | **---** | **K.AREDIFMETLK.D** 5244 |
|  | 7304 | **797.77** | **2390.29** | **2390.35** | **-0.06** | **0** | **2** | **44** | **1** | **---** | **---** | **---** | **---** | **---** | **---** | **K.EIPAWVPFDPAAQITK.Q** |
|  | 8677 | **903.15** | **2706.41** | **2706.41** | **0.01** | **0** | **95** | **1.9e-008** | **1** | **1.457** | **1.034** | **0.719** | **0.952** | **0.983** | **1.275** | **K.HVEDVPAFQALGSLNDLQFFR.Y** 8676 |

  


---

|  |  |
| --- | --- |
| **31.** | P04264    **Mass:** 74959    **Score:** 151    **Queries matched:** 6   **emPAI:** 0.06 |
|  | Keratin, type II cytoskeletal 1 OS=Homo sapiens GN=KRT1 PE=1 SV=6 |

|  |  |  |  |  |  |
| --- | --- | --- | --- | --- | --- |
|  | **Quantitation:** | **Ratio** | **Weighted** | **N** | **SD(geo)** |
|  |  | Patient3-Art/Control | 1.263 | 5 | 1.570 |
|  |  | Patient3-Porta/Control | 1.120 | 4 | 1.694 |
|  |  | Patient3-Hepa/Control | 1.382 | 5 | 1.700 |
|  |  | **Patient2-Art/Control** | **2.131** | **5** | **1.484** |
|  |  | Patient2-Porta/Control | 2.031 | 5 | 1.846 |
|  |  | **Patient2-Hepa/Control** | **7.369** | **5** | **1.775** |

|  |  |  |  |  |  |  |  |  |  |  |  |  |  |  |  |  |
| --- | --- | --- | --- | --- | --- | --- | --- | --- | --- | --- | --- | --- | --- | --- | --- | --- |
|  | **Query** | **Observed** | **Mr(expt)** | **Mr(calc)** | **Delta** | **Miss** | **Score** | **Expect** | **Rank** | **Patient3-Art/Control** | **Patient3-Porta/Control** | **Patient3-Hepa/Control** | **Patient2-Art/Control** | **Patient2-Porta/Control** | **Patient2-Hepa/Control** | **Peptide** |
|  | 2317 | **639.36** | **1276.71** | **1276.73** | **-0.02** | **0** | **8** | **7.8** | **1** | **---** | **---** | **---** | **---** | **---** | **---** | **K.IEISELNR.V** |
|  | 4991 | **637.65** | **1909.93** | **1910.12** | **-0.19** | **0** | **73** | **2.5e-006** | **1** | **1.199** | **1.020** | **1.316** | **2.692** | **2.087** | **9.835** | **R.SLDLDSIIAEVK.A** 4993 4994 4995 4996 |

  


---

|  |  |
| --- | --- |
| **32.** | P04003    **Mass:** 79292    **Score:** 148    **Queries matched:** 13   **emPAI:** 0.17 |
|  | C4b-binding protein alpha chain OS=Homo sapiens GN=C4BPA PE=1 SV=2 |

|  |  |  |  |  |  |
| --- | --- | --- | --- | --- | --- |
|  | **Quantitation:** | **Ratio** | **Weighted** | **N** | **SD(geo)** |
|  |  | Patient3-Art/Control | 1.601 | 3 | 1.973 |
|  |  | Patient3-Porta/Control | 1.416 | 4 | 9.465 |
|  |  | Patient3-Hepa/Control | 1.319 | 4 | 38.820 |
|  |  | Patient2-Art/Control | 1.722 | 3 | 1.572 |
|  |  | Patient2-Porta/Control | 1.141 | 3 | 1.268 |
|  |  | Patient2-Hepa/Control | 1.606 | 3 | 1.556 |

|  |  |  |  |  |  |  |  |  |  |  |  |  |  |  |  |  |
| --- | --- | --- | --- | --- | --- | --- | --- | --- | --- | --- | --- | --- | --- | --- | --- | --- |
|  | **Query** | **Observed** | **Mr(expt)** | **Mr(calc)** | **Delta** | **Miss** | **Score** | **Expect** | **Rank** | **Patient3-Art/Control** | **Patient3-Porta/Control** | **Patient3-Hepa/Control** | **Patient2-Art/Control** | **Patient2-Porta/Control** | **Patient2-Hepa/Control** | **Peptide** |
|  | 4169 | **575.97** | **1724.89** | **1724.92** | **-0.03** | **0** | **2** | **37** | **2** | **---** | **---** | **---** | **---** | **---** | **---** | **K.YTCLPGYVR.S** |
|  | 4352 | **592.33** | **1773.98** | **1774.01** | **-0.04** | **0** | **69** | **8.1e-006** | **1** | **0.842** | **1.371** | **0.245** | **1.434** | **1.015** | **1.330** | **K.LSLEIEQLELQR.D** 4348 4350 4351 4353 4355 4356 |
|  | 5545 | **686.34** | **2056.00** | **2056.06** | **-0.06** | **0** | **38** | **0.0069** | **1** | **2.281** | **2.086** | **2.274** | **2.322** | **1.348** | **2.152** | **R.LMQCLPNPEDVK.M** 5546 5547 |
|  | 7972 | **837.05** | **2508.12** | **2508.16** | **-0.04** | **0** | **40** | **0.0017** | **1** | **1.138** | **1.132** | **0.903** | **1.204** | **0.969** | **1.138** | **K.CEWETPEGCEQVLTGK.R** 7971 |

  


---

|  |  |
| --- | --- |
| **33.** | Patient27169    **Mass:** 46250    **Score:** 132    **Queries matched:** 15   **emPAI:** 0.70 |
|  | Serum paraoxonase/arylesterase 1 OS=Homo sapiens GN=PON1 PE=1 SV=2 |

|  |  |  |  |  |  |
| --- | --- | --- | --- | --- | --- |
|  | **Quantitation:** | **Ratio** | **Weighted** | **N** | **SD(geo)** |
|  |  | Patient3-Art/Control | 1.033 | 4 | 2.532 |
|  |  | Patient3-Porta/Control | 1.107 | 5 | 4.313 |
|  |  | Patient3-Hepa/Control | 1.226 | 4 | 3.224 |
|  |  | Patient2-Art/Control | 0.846 | 5 | 3.000 |
|  |  | Patient2-Porta/Control | 1.072 | 5 | 1.763 |
|  |  | Patient2-Hepa/Control | 0.971 | 5 | 4.380 |

|  |  |  |  |  |  |  |  |  |  |  |  |  |  |  |  |  |
| --- | --- | --- | --- | --- | --- | --- | --- | --- | --- | --- | --- | --- | --- | --- | --- | --- |
|  | **Query** | **Observed** | **Mr(expt)** | **Mr(calc)** | **Delta** | **Miss** | **Score** | **Expect** | **Rank** | **Patient3-Art/Control** | **Patient3-Porta/Control** | **Patient3-Hepa/Control** | **Patient2-Art/Control** | **Patient2-Porta/Control** | **Patient2-Hepa/Control** | **Peptide** |
|  | 972 | **531.27** | **1060.52** | **1060.52** | **-0.00** | **0** | **18** | **0.58** | **1** | **---** | **---** | **---** | **---** | **---** | **---** | **K.ALYCEL.-** 973 974 |
|  | 3736 | **545.99** | **1634.95** | **1635.03** | **-0.08** | **0** | **46** | **0.0016** | **1** | **1.943** | **2.027** | **2.246** | **0.820** | **1.373** | **1.902** | **K.LLIGTVFHK.A** 3737 3738 3739 |
|  | 4405 | **598.34** | **1792.01** | **1792.06** | **-0.05** | **0** | **37** | **0.014** | **1** | **0.873** | **0.611** | **1.031** | **0.457** | **0.941** | **0.544** | **R.IQNILTEEPK.V** |
|  | 6411 | **730.04** | **2187.10** | **2187.12** | **-0.01** | **0** | **23** | **0.29** | **1** | **---** | **---** | **---** | **---** | **---** | **---** | **K.IFFYDSENPPASEVLR.I** 6410 |
|  | 6715 | **746.05** | **2235.13** | **2235.22** | **-0.10** | **0** | **30** | **0.053** | **1** | **0.989** | **1.119** | **1.169** | **0.943** | **1.087** | **0.972** | **R.EVQPVELPNCNLVK.G** 6714 6716 |
|  | 9742 | **1008.86** | **3023.55** | **3023.66** | **-0.10** | **0** | **69** | **7.3e-006** | **1** | **2.230** | **3.742** | **3.690** | **2.064** | **1.342** | **4.271** | **K.ILLMDLNEEDPTVLELGITGSK.F** 9741 |

  


---

|  |  |
| --- | --- |
| **34.** | P01019    **Mass:** 60043    **Score:** 132    **Queries matched:** 16   **emPAI:** 0.32 |
|  | Angiotensinogen OS=Homo sapiens GN=AGT PE=1 SV=1 |

|  |  |  |  |  |  |
| --- | --- | --- | --- | --- | --- |
|  | **Quantitation:** | **Ratio** | **Weighted** | **N** | **SD(geo)** |
|  |  | Patient3-Art/Control | --- | 2 | --- |
|  |  | Patient3-Porta/Control | --- | 2 | --- |
|  |  | Patient3-Hepa/Control | --- | 2 | --- |
|  |  | Patient2-Art/Control | --- | 2 | --- |
|  |  | Patient2-Porta/Control | --- | 2 | --- |
|  |  | Patient2-Hepa/Control | --- | 2 | --- |

|  |  |  |  |  |  |  |  |  |  |  |  |  |  |  |  |  |
| --- | --- | --- | --- | --- | --- | --- | --- | --- | --- | --- | --- | --- | --- | --- | --- | --- |
|  | **Query** | **Observed** | **Mr(expt)** | **Mr(calc)** | **Delta** | **Miss** | **Score** | **Expect** | **Rank** | **Patient3-Art/Control** | **Patient3-Porta/Control** | **Patient3-Hepa/Control** | **Patient2-Art/Control** | **Patient2-Porta/Control** | **Patient2-Hepa/Control** | **Peptide** |
|  | 1115 | **538.81** | **1075.61** | **1075.62** | **-0.01** | **0** | **12** | **3.2** | **1** | **---** | **---** | **---** | **---** | **---** | **---** | **R.VANPLSTA.-** |
|  | 4596 | **611.97** | **1832.90** | **1832.96** | **-0.06** | **0** | **15** | **1.6** | **1** | **---** | **---** | **---** | **---** | **---** | **---** | **R.AAMVGMLANFLGFR.I** |
|  | 4845 | **626.36** | **1876.06** | **1876.16** | **-0.10** | **0** | **26** | **0.19** | **1** | **---** | **---** | **---** | **---** | **---** | **---** | **K.ALQDQLVLVAAK.L** 4838 4848 |
|  | 4971 | **636.01** | **1905.00** | **1905.12** | **-0.12** | **0** | **17** | **1.2** | **1** | **---** | **---** | **---** | **---** | **---** | **---** | **K.DPTFIPAPIQAK.T** 4972 |
|  | 5503 | **682.67** | **2045.00** | **2045.11** | **-0.11** | **0** | **60** | **4.6e-005** | **1** | **0.918** | **1.226** | **0.940** | **1.370** | **1.118** | **1.685** | **R.SLDFTELDVAAEK.I** 5501 5502 5504 |
|  | 6484 | **734.74** | **2201.20** | **2201.29** | **-0.08** | **0** | **34** | **0.028** | **1** | **###** | **###** | **###** | **###** | **###** | **###** | **K.QPFVQGLALYTPVVLPR.S** 6482 6483 6485 6486 |

  


---

|  |  |
| --- | --- |
| **35.** | P02763    **Mass:** 28244    **Score:** 108    **Queries matched:** 9   **emPAI:** 0.78 |
|  | Alpha-1-acid glycoprotein 1 OS=Homo sapiens GN=ORM1 PE=1 SV=1 |

|  |  |  |  |  |  |
| --- | --- | --- | --- | --- | --- |
|  | **Quantitation:** | **Ratio** | **Weighted** | **N** | **SD(geo)** |
|  |  | **Patient3-Art/Control** | **0.762** | **3** | **1.052** |
|  |  | **Patient3-Porta/Control** | **0.762** | **3** | **1.090** |
|  |  | Patient3-Hepa/Control | 0.913 | 3 | 1.765 |
|  |  | **Patient2-Art/Control** | **0.736** | **3** | **1.032** |
|  |  | Patient2-Porta/Control | 0.705 | 3 | 1.364 |
|  |  | Patient2-Hepa/Control | 1.054 | 3 | 1.299 |

|  |  |  |  |  |  |  |  |  |  |  |  |  |  |  |  |  |
| --- | --- | --- | --- | --- | --- | --- | --- | --- | --- | --- | --- | --- | --- | --- | --- | --- |
|  | **Query** | **Observed** | **Mr(expt)** | **Mr(calc)** | **Delta** | **Miss** | **Score** | **Expect** | **Rank** | **Patient3-Art/Control** | **Patient3-Porta/Control** | **Patient3-Hepa/Control** | **Patient2-Art/Control** | **Patient2-Porta/Control** | **Patient2-Hepa/Control** | **Peptide** |
|  | 631 | **500.70** | **999.38** | **999.53** | **-0.15** | **0** | **3** | **8.8** | **4** | **---** | **---** | **---** | **---** | **---** | **---** | **R.EYQTR.Q** |
|  | 2752 | 686.84 | 1371.66 | 1371.74 | -0.08 | 0 | 20 | 0.53 | 1 | --- | --- | --- | --- | --- | --- | K.CEPLEK.Q 2751 |
|  | 5473 | **679.32** | **2034.93** | **2034.97** | **-0.04** | **0** | **81** | **2.3e-007** | **1** | **0.801** | **0.872** | **0.758** | **0.727** | **0.761** | **1.260** | **K.EQLGEFYEALDCLR.I** 5472 5475 5481 |
|  | 5616 | **690.69** | **2069.04** | **2069.06** | **-0.02** | **0** | **32** | **0.04** | **1** | **0.723** | **0.812** | **2.078** | **0.698** | **1.167** | **1.600** | **K.TYMLAFDVNDEK.N** 5615 |

  


---

|  |  |
| --- | --- |
| **36.** | P02760    **Mass:** 45490    **Score:** 105    **Queries matched:** 7   **emPAI:** 0.09 |
|  | Protein AMBP OS=Homo sapiens GN=AMBP PE=1 SV=1 |

|  |  |  |  |  |  |
| --- | --- | --- | --- | --- | --- |
|  | **Quantitation:** | **Ratio** | **Weighted** | **N** | **SD(geo)** |
|  |  | Patient3-Art/Control | 1.921 | 3 | 2.055 |
|  |  | Patient3-Porta/Control | 2.016 | 3 | 2.336 |
|  |  | Patient3-Hepa/Control | 2.346 | 3 | 2.096 |
|  |  | Patient2-Art/Control | --- | 2 | --- |
|  |  | Patient2-Porta/Control | 1.256 | 3 | 1.976 |
|  |  | Patient2-Hepa/Control | 2.042 | 3 | 1.800 |

|  |  |  |  |  |  |  |  |  |  |  |  |  |  |  |  |  |
| --- | --- | --- | --- | --- | --- | --- | --- | --- | --- | --- | --- | --- | --- | --- | --- | --- |
|  | **Query** | **Observed** | **Mr(expt)** | **Mr(calc)** | **Delta** | **Miss** | **Score** | **Expect** | **Rank** | **Patient3-Art/Control** | **Patient3-Porta/Control** | **Patient3-Hepa/Control** | **Patient2-Art/Control** | **Patient2-Porta/Control** | **Patient2-Hepa/Control** | **Peptide** |
|  | 3293 | **753.91** | **1505.81** | **1505.84** | **-0.03** | **0** | **17** | **1.5** | **1** | **---** | **---** | **---** | **---** | **---** | **---** | **R.TVAACNLPIVR.G** |
|  | 5432 | **673.05** | **2016.11** | **2016.17** | **-0.05** | **0** | **60** | **6.3e-005** | **1** | **1.072** | **0.838** | **1.104** | **0.973** | **0.502** | **0.885** | **R.AFIQLWAFDAVK.G** 5430 5433 5434 |
|  | 6928 | **577.30** | **2305.18** | **2305.12** | **0.06** | **0** | **10** | **6.1** | **1** | **---** | **---** | **---** | **---** | **---** | **---** | **R.EYCGVPGDGDEELLR.F** 6926 |

  


---

|  |  |
| --- | --- |
| **37.** | P02749    **Mass:** 48761    **Score:** 99     **Queries matched:** 23   **emPAI:** 0.40 |
|  | Beta-2-glycoprotein 1 OS=Homo sapiens GN=APOH PE=1 SV=3 |

|  |  |  |  |  |  |
| --- | --- | --- | --- | --- | --- |
|  | **Quantitation:** | **Ratio** | **Weighted** | **N** | **SD(geo)** |
|  |  | Patient3-Art/Control | 0.968 | 4 | 1.537 |
|  |  | Patient3-Porta/Control | 0.953 | 4 | 1.762 |
|  |  | Patient3-Hepa/Control | 0.842 | 4 | 2.555 |
|  |  | Patient2-Art/Control | 1.110 | 4 | 1.909 |
|  |  | Patient2-Porta/Control | 1.052 | 4 | 1.429 |
|  |  | Patient2-Hepa/Control | 0.985 | 4 | 2.742 |

|  |  |  |  |  |  |  |  |  |  |  |  |  |  |  |  |  |
| --- | --- | --- | --- | --- | --- | --- | --- | --- | --- | --- | --- | --- | --- | --- | --- | --- |
|  | **Query** | **Observed** | **Mr(expt)** | **Mr(calc)** | **Delta** | **Miss** | **Score** | **Expect** | **Rank** | **Patient3-Art/Control** | **Patient3-Porta/Control** | **Patient3-Hepa/Control** | **Patient2-Art/Control** | **Patient2-Porta/Control** | **Patient2-Hepa/Control** | **Peptide** |
|  | 488 | 484.24 | 966.48 | 966.49 | -0.02 | 0 | 23 | 0.48 | 1 | --- | --- | --- | --- | --- | --- | K.LPECR.E 485 486 487 489 490 492 493 494 |
|  | 2811 | **692.83** | **1383.65** | **1383.75** | **-0.10** | **0** | **28** | **0.083** | **1** | **---** | **---** | **---** | **---** | **---** | **---** | **K.VSFFCK.N** 2812 2813 |
|  | 7230 | **790.78** | **2369.31** | **2369.35** | **-0.04** | **0** | **36** | **0.016** | **1** | **0.983** | **0.784** | **0.567** | **1.052** | **1.063** | **0.906** | **K.FICPLTGLWPINTLK.C** 7224 7225 7227 7229 |
|  | 9041 | **704.63** | **2814.51** | **2814.58** | **-0.07** | **0** | **31** | **0.051** | **1** | **1.014** | **1.090** | **0.926** | **1.274** | **1.134** | **1.140** | **R.TCPKPDDLPFSTVVPLK.T** 9038 9040 |
|  | 9910 | **1034.52** | **3100.54** | **3100.59** | **-0.05** | **0** | **19** | **0.52** | **1** | **---** | **---** | **---** | **---** | **---** | **---** | **K.WSPELPVCAPIICPPPSIPTFATLR.V** 9909 9911 |

  


---

|  |  |
| --- | --- |
| **38.** | Patient39827    **Mass:** 116295   **Score:** 90     **Queries matched:** 5   **emPAI:** 0.07 |
|  | Inter-alpha-trypsin inhibitor heavy chain H1 OS=Homo sapiens GN=ITIH1 PE=1 SV=3 |

|  |  |  |  |  |  |
| --- | --- | --- | --- | --- | --- |
|  | **Quantitation:** | **Ratio** | **Weighted** | **N** | **SD(geo)** |
|  |  | Patient3-Art/Control | --- | 1 | --- |
|  |  | Patient3-Porta/Control | --- | 1 | --- |
|  |  | Patient3-Hepa/Control | --- | 1 | --- |
|  |  | Patient2-Art/Control | --- | 1 | --- |
|  |  | Patient2-Porta/Control | --- | 1 | --- |
|  |  | Patient2-Hepa/Control | --- | 1 | --- |

|  |  |  |  |  |  |  |  |  |  |  |  |  |  |  |  |  |
| --- | --- | --- | --- | --- | --- | --- | --- | --- | --- | --- | --- | --- | --- | --- | --- | --- |
|  | **Query** | **Observed** | **Mr(expt)** | **Mr(calc)** | **Delta** | **Miss** | **Score** | **Expect** | **Rank** | **Patient3-Art/Control** | **Patient3-Porta/Control** | **Patient3-Hepa/Control** | **Patient2-Art/Control** | **Patient2-Porta/Control** | **Patient2-Hepa/Control** | **Peptide** |
|  | 1777 | 591.34 | 1180.67 | 1180.76 | -0.09 | 0 | 11 | 5.4 | 1 | --- | --- | --- | --- | --- | --- | K.EALLK.I |
|  | 4319 | **590.31** | **1767.90** | **1768.02** | **-0.12** | **0** | **31** | **0.046** | **1** | **0.821** | **0.799** | **0.698** | **0.521** | **1.068** | **1.033** | **R.EVAFDLEIPK.T** 4320 |
|  | 6931 | **770.05** | **2307.12** | **2307.21** | **-0.09** | **0** | **64** | **2.1e-005** | **1** | **###** | **###** | **###** | **---** | **---** | **---** | **K.GSLVQASEANLQAAQDFVR.G** 6932 |

  


---

|  |  |
| --- | --- |
| **39.** | P00734    **Mass:** 80314    **Score:** 90     **Queries matched:** 14   **emPAI:** 0.17 |
|  | Prothrombin OS=Homo sapiens GN=F2 PE=1 SV=2 |

|  |  |  |  |  |  |
| --- | --- | --- | --- | --- | --- |
|  | **Quantitation:** | **Ratio** | **Weighted** | **N** | **SD(geo)** |
|  |  | Patient3-Art/Control | --- | 1 | --- |
|  |  | Patient3-Porta/Control | --- | 1 | --- |
|  |  | Patient3-Hepa/Control | --- | 1 | --- |
|  |  | Patient2-Art/Control | --- | 1 | --- |
|  |  | Patient2-Porta/Control | --- | 1 | --- |
|  |  | Patient2-Hepa/Control | --- | 1 | --- |

|  |  |  |  |  |  |  |  |  |  |  |  |  |  |  |  |  |
| --- | --- | --- | --- | --- | --- | --- | --- | --- | --- | --- | --- | --- | --- | --- | --- | --- |
|  | **Query** | **Observed** | **Mr(expt)** | **Mr(calc)** | **Delta** | **Miss** | **Score** | **Expect** | **Rank** | **Patient3-Art/Control** | **Patient3-Porta/Control** | **Patient3-Hepa/Control** | **Patient2-Art/Control** | **Patient2-Porta/Control** | **Patient2-Hepa/Control** | **Peptide** |
|  | 1351 | **556.31** | **1110.60** | **1110.59** | **0.01** | **0** | **3** | **70** | **1** | **---** | **---** | **---** | **---** | **---** | **---** | **K.VIDQFGE.-** |
|  | 3038 | **721.31** | **1440.62** | **1440.72** | **-0.10** | **0** | **6** | **7.4** | **1** | **---** | **---** | **---** | **---** | **---** | **---** | **R.SGIECQLWR.S** |
|  | 3258 | **749.87** | **1497.72** | **1497.80** | **-0.08** | **0** | **23** | **0.27** | **1** | **---** | **---** | **---** | **---** | **---** | **---** | **R.ELLESYIDGR.I** 3257 3259 3260 3262 |
|  | 4673 | 922.51 | 1843.01 | 1843.17 | -0.16 | 1 | 4 | 26 | 5 | --- | --- | --- | --- | --- | --- | R.DIALMKLK.K 4664 |
|  | 7730 | **621.07** | **2480.24** | **2480.27** | **-0.03** | **0** | **28** | **0.081** | **1** | **---** | **---** | **---** | **---** | **---** | **---** | **R.TFGSGEADCGLRPLFEK.K** |
|  | 8206 | 862.43 | 2584.26 | 2584.30 | -0.04 | 0 | (1) | 31 | 5 | --- | --- | --- | --- | --- | --- | R.IVEGSDAEIGMSPWQVMLFR.K |
|  | 8324 | **867.76** | **2600.25** | **2600.29** | **-0.04** | **0** | **21** | **0.28** | **1** | **---** | **---** | **---** | **---** | **---** | **---** | **R.IVEGSDAEIGMSPWQVMLFR.K** |
|  | 9080 | **708.13** | **2828.48** | **2828.62** | **-0.15** | **0** | **65** | **1.8e-005** | **1** | **0.803** | **0.944** | **0.966** | **0.689** | **0.922** | **0.867** | **K.GQPSVLQVVNLPIVERPVCK.D** 9081 |

  


---

|  |  |
| --- | --- |
| **40.** | P51884    **Mass:** 46590    **Score:** 85     **Queries matched:** 7   **emPAI:** 0.19 |
|  | Lumican OS=Homo sapiens GN=LUM PE=1 SV=2 |

|  |  |  |  |  |  |
| --- | --- | --- | --- | --- | --- |
|  | **Quantitation:** | **Ratio** | **Weighted** | **N** | **SD(geo)** |
|  |  | Patient3-Art/Control | --- | 1 | --- |
|  |  | Patient3-Porta/Control | --- | 1 | --- |
|  |  | Patient3-Hepa/Control | --- | 1 | --- |
|  |  | Patient2-Art/Control | --- | 1 | --- |
|  |  | Patient2-Porta/Control | --- | 1 | --- |
|  |  | Patient2-Hepa/Control | --- | 1 | --- |

|  |  |  |  |  |  |  |  |  |  |  |  |  |  |  |  |  |
| --- | --- | --- | --- | --- | --- | --- | --- | --- | --- | --- | --- | --- | --- | --- | --- | --- |
|  | **Query** | **Observed** | **Mr(expt)** | **Mr(calc)** | **Delta** | **Miss** | **Score** | **Expect** | **Rank** | **Patient3-Art/Control** | **Patient3-Porta/Control** | **Patient3-Hepa/Control** | **Patient2-Art/Control** | **Patient2-Porta/Control** | **Patient2-Hepa/Control** | **Peptide** |
|  | 844 | **516.28** | **1030.55** | **1030.61** | **-0.06** | **0** | **12** | **6.7** | **1** | **---** | **---** | **---** | **---** | **---** | **---** | **K.YLYLR.N** 846 |
|  | 1697 | **582.32** | **1162.63** | **1162.65** | **-0.02** | **0** | **29** | **0.053** | **1** | **###** | **###** | **###** | **###** | **###** | **---** | **R.VANEVTLN.-** 1698 |
|  | 8137 | **855.82** | **2564.44** | **2564.50** | **-0.06** | **0** | **45** | **0.0019** | **1** | **1.033** | **1.290** | **0.782** | **1.990** | **1.370** | **0.967** | **R.LPSGLPVSLLTLYLDNNK.I** 8134 8136 |

  


---

|  |  |
| --- | --- |
| **41.** | P02655    **Mass:** 13406    **Score:** 72     **Queries matched:** 14   **emPAI:** 1.39 |
|  | Apolipoprotein C-II OS=Homo sapiens GN=APOC2 PE=1 SV=1 |

|  |  |  |  |  |  |
| --- | --- | --- | --- | --- | --- |
|  | **Quantitation:** | **Ratio** | **Weighted** | **N** | **SD(geo)** |
|  |  | Patient3-Art/Control | --- | 1 | --- |
|  |  | Patient3-Porta/Control | --- | 1 | --- |
|  |  | Patient3-Hepa/Control | --- | 1 | --- |
|  |  | Patient2-Art/Control | --- | 1 | --- |
|  |  | Patient2-Porta/Control | --- | 1 | --- |
|  |  | Patient2-Hepa/Control | --- | 1 | --- |

|  |  |  |  |  |  |  |  |  |  |  |  |  |  |  |  |  |
| --- | --- | --- | --- | --- | --- | --- | --- | --- | --- | --- | --- | --- | --- | --- | --- | --- |
|  | **Query** | **Observed** | **Mr(expt)** | **Mr(calc)** | **Delta** | **Miss** | **Score** | **Expect** | **Rank** | **Patient3-Art/Control** | **Patient3-Porta/Control** | **Patient3-Hepa/Control** | **Patient2-Art/Control** | **Patient2-Porta/Control** | **Patient2-Hepa/Control** | **Peptide** |
|  | 3274 | **501.62** | **1501.83** | **1501.91** | **-0.08** | **1** | **9** | **8.3** | **1** | **---** | **---** | **---** | **---** | **---** | **---** | **K.LRDLYSK.S** |
|  | 9159 | **715.11** | **2856.42** | **2856.54** | **-0.12** | **0** | **27** | **0.099** | **1** | **---** | **---** | **---** | **---** | **---** | **---** | **K.STAAMSTYTGIFTDQVLSVLK.G** 9154 9155 9156 9158 9160 9161 9166 9167 9168 9172 9173 |
|  | 10061 | **1058.19** | **3171.54** | **3171.65** | **-0.10** | **1** | **44** | **0.0016** | **1** | **1.459** | **1.714** | **0.655** | **0.541** | **1.352** | **1.196** | **K.STAAMSTYTGIFTDQVLSVLKGEE.-** |

  


---

|  |  |
| --- | --- |
| **42.** | P02751    **Mass:** 289372   **Score:** 72     **Queries matched:** 10   **emPAI:** 0.03 |
|  | Fibronectin OS=Homo sapiens GN=FN1 PE=1 SV=3 |

|  |  |  |  |  |  |
| --- | --- | --- | --- | --- | --- |
|  | **Quantitation:** | **Ratio** | **Weighted** | **N** | **SD(geo)** |
|  |  | Patient3-Art/Control | --- | 2 | --- |
|  |  | Patient3-Porta/Control | --- | 2 | --- |
|  |  | Patient3-Hepa/Control | --- | 2 | --- |
|  |  | Patient2-Art/Control | --- | 2 | --- |
|  |  | Patient2-Porta/Control | --- | 2 | --- |
|  |  | Patient2-Hepa/Control | --- | 2 | --- |

|  |  |  |  |  |  |  |  |  |  |  |  |  |  |  |  |  |
| --- | --- | --- | --- | --- | --- | --- | --- | --- | --- | --- | --- | --- | --- | --- | --- | --- |
|  | **Query** | **Observed** | **Mr(expt)** | **Mr(calc)** | **Delta** | **Miss** | **Score** | **Expect** | **Rank** | **Patient3-Art/Control** | **Patient3-Porta/Control** | **Patient3-Hepa/Control** | **Patient2-Art/Control** | **Patient2-Porta/Control** | **Patient2-Hepa/Control** | **Peptide** |
|  | 1017 | **532.32** | **1062.63** | **1062.67** | **-0.04** | **0** | **32** | **0.025** | **1** | **1.089** | **1.005** | **1.618** | **0.784** | **0.487** | **0.950** | **R.LTVGLTR.R** 1011 1012 1019 1022 1024 1025 1026 |
|  | 1106 | **538.27** | **1074.52** | **1074.63** | **-0.11** | **0** | **8** | **6.2** | **1** | **---** | **---** | **---** | **---** | **---** | **---** | **K.SEPLIGR.K** |
|  | 8387 | **868.12** | **2601.33** | **2601.39** | **-0.06** | **0** | **63** | **3.1e-005** | **1** | **2.261** | **1.277** | **1.137** | **0.951** | **0.627** | **1.140** | **R.NTFAEVTGLSPGVTYYFK.V** |

  


---

|  |  |
| --- | --- |
| **43.** | P43652    **Mass:** 86406    **Score:** 64     **Queries matched:** 17   **emPAI:** 0.16 |
|  | Afamin OS=Homo sapiens GN=AFM PE=1 SV=1 |

|  |  |  |  |  |  |
| --- | --- | --- | --- | --- | --- |
|  | **Quantitation:** | **Ratio** | **Weighted** | **N** | **SD(geo)** |
|  |  | Patient3-Art/Control | --- | 1 | --- |
|  |  | Patient3-Porta/Control | --- | 1 | --- |
|  |  | Patient3-Hepa/Control | --- | 1 | --- |
|  |  | Patient2-Art/Control | --- | 1 | --- |
|  |  | Patient2-Porta/Control | --- | 1 | --- |
|  |  | Patient2-Hepa/Control | --- | 1 | --- |

|  |  |  |  |  |  |  |  |  |  |  |  |  |  |  |  |  |
| --- | --- | --- | --- | --- | --- | --- | --- | --- | --- | --- | --- | --- | --- | --- | --- | --- |
|  | **Query** | **Observed** | **Mr(expt)** | **Mr(calc)** | **Delta** | **Miss** | **Score** | **Expect** | **Rank** | **Patient3-Art/Control** | **Patient3-Porta/Control** | **Patient3-Hepa/Control** | **Patient2-Art/Control** | **Patient2-Porta/Control** | **Patient2-Hepa/Control** | **Peptide** |
|  | 3721 | **545.28** | **1632.81** | **1632.89** | **-0.08** | **0** | **15** | **1.9** | **1** | **---** | **---** | **---** | **---** | **---** | **---** | **R.RPCFESLK.A** 3720 |
|  | 4959 | **634.29** | **1899.84** | **1899.93** | **-0.09** | **0** | **61** | **1.8e-005** | **1** | **0.714** | **0.758** | **0.984** | **0.725** | **0.843** | **1.096** | **R.TINPAVDHCCK.T** 4960 |
|  | 7091 | **774.77** | **2321.30** | **2321.33** | **-0.03** | **0** | **23** | **0.33** | **1** | **---** | **---** | **---** | **---** | **---** | **---** | **K.IAPQLSTEELVSLGEK.M** 6996 7057 7071 7084 7089 7090 |
|  | 7900 | **832.76** | **2495.26** | **2495.34** | **-0.08** | **0** | **18** | **0.86** | **1** | **---** | **---** | **---** | **---** | **---** | **---** | **K.SDVGFLPPFPTLDPEEK.C** 7898 7899 7901 7902 7903 |

  


---

|  |  |
| --- | --- |
| **44.** | Q9NP78    **Mass:** 93003    **Score:** 56     **Queries matched:** 4   **emPAI:** 0.05 |
|  | ATP-binding cassette sub-family B member 9 OS=Homo sapiens GN=ABCB9 PE=1 SV=1 |

|  |  |  |  |  |  |
| --- | --- | --- | --- | --- | --- |
|  | **Quantitation:** | **Ratio** | **Weighted** | **N** | **SD(geo)** |
|  |  | Patient3-Art/Control | --- | 1 | --- |
|  |  | Patient3-Porta/Control | --- | 1 | --- |
|  |  | Patient3-Hepa/Control | --- | 1 | --- |
|  |  | Patient2-Art/Control | --- | 1 | --- |
|  |  | Patient2-Porta/Control | --- | 1 | --- |
|  |  | Patient2-Hepa/Control | --- | 1 | --- |

|  |  |  |  |  |  |  |  |  |  |  |  |  |  |  |  |  |
| --- | --- | --- | --- | --- | --- | --- | --- | --- | --- | --- | --- | --- | --- | --- | --- | --- |
|  | **Query** | **Observed** | **Mr(expt)** | **Mr(calc)** | **Delta** | **Miss** | **Score** | **Expect** | **Rank** | **Patient3-Art/Control** | **Patient3-Porta/Control** | **Patient3-Hepa/Control** | **Patient2-Art/Control** | **Patient2-Porta/Control** | **Patient2-Hepa/Control** | **Peptide** |
|  | 1608 | **575.32** | **1148.63** | **1148.67** | **-0.04** | **0** | **56** | **0.0001** | **1** | **1.248** | **0.843** | **0.686** | **1.236** | **0.670** | **0.895** | **R.SLLEDIR.H** 1606 1609 1610 |

  


---

|  |  |
| --- | --- |
| **45.** | P36955    **Mass:** 54969    **Score:** 49     **Queries matched:** 1   **emPAI:** 0.08 |
|  | Pigment epithelium-derived factor OS=Homo sapiens GN=SERPINF1 PE=1 SV=3 |

|  |  |  |  |  |  |
| --- | --- | --- | --- | --- | --- |
|  | **Quantitation:** | **Ratio** | **Weighted** | **N** | **SD(geo)** |
|  |  | Patient3-Art/Control | --- | 1 | --- |
|  |  | Patient3-Porta/Control | --- | 1 | --- |
|  |  | Patient3-Hepa/Control | --- | 1 | --- |
|  |  | Patient2-Art/Control | --- | 1 | --- |
|  |  | Patient2-Porta/Control | --- | 1 | --- |
|  |  | Patient2-Hepa/Control | --- | 1 | --- |

|  |  |  |  |  |  |  |  |  |  |  |  |  |  |  |  |  |
| --- | --- | --- | --- | --- | --- | --- | --- | --- | --- | --- | --- | --- | --- | --- | --- | --- |
|  | **Query** | **Observed** | **Mr(expt)** | **Mr(calc)** | **Delta** | **Miss** | **Score** | **Expect** | **Rank** | **Patient3-Art/Control** | **Patient3-Porta/Control** | **Patient3-Hepa/Control** | **Patient2-Art/Control** | **Patient2-Porta/Control** | **Patient2-Hepa/Control** | **Peptide** |
|  | 5292 | **664.66** | **1990.95** | **1991.08** | **-0.13** | **0** | **49** | **0.00061** | **1** | **1.009** | **1.700** | **1.701** | **1.488** | **1.600** | **0.888** | **K.LQSLFDSPDFSK.I** |

  


---

|  |  |
| --- | --- |
| **46.** | P02748    **Mass:** 75888    **Score:** 46     **Queries matched:** 9   **emPAI:** 0.06 |
|  | Complement component C9 OS=Homo sapiens GN=C9 PE=1 SV=2 |

|  |  |  |  |  |  |
| --- | --- | --- | --- | --- | --- |
|  | **Quantitation:** | **Ratio** | **Weighted** | **N** | **SD(geo)** |
|  |  | Patient3-Art/Control | --- | 1 | --- |
|  |  | Patient3-Porta/Control | --- | 1 | --- |
|  |  | Patient3-Hepa/Control | --- | 1 | --- |
|  |  | Patient2-Art/Control | --- | 1 | --- |
|  |  | Patient2-Porta/Control | --- | 1 | --- |
|  |  | Patient2-Hepa/Control | --- | 1 | --- |

|  |  |  |  |  |  |  |  |  |  |  |  |  |  |  |  |  |
| --- | --- | --- | --- | --- | --- | --- | --- | --- | --- | --- | --- | --- | --- | --- | --- | --- |
|  | **Query** | **Observed** | **Mr(expt)** | **Mr(calc)** | **Delta** | **Miss** | **Score** | **Expect** | **Rank** | **Patient3-Art/Control** | **Patient3-Porta/Control** | **Patient3-Hepa/Control** | **Patient2-Art/Control** | **Patient2-Porta/Control** | **Patient2-Hepa/Control** | **Peptide** |
|  | 1441 | **564.86** | **1127.71** | **1127.62** | **0.10** | **1** | **4** | **20** | **2** | **---** | **---** | **---** | **---** | **---** | **---** | **R.QMFRSR.S** 1429 1432 1434 1435 1437 1444 |
|  | 4248 | **584.28** | **1749.82** | **1749.93** | **-0.10** | **0** | **46** | **0.0011** | **1** | **1.546** | **0.633** | **0.708** | **0.984** | **1.175** | **1.268** | **K.FEGIACEISK.Q** |
|  | 9325 | **724.12** | **2892.45** | **2892.60** | **-0.15** | **2** | **1** | **37** | **2** | **---** | **---** | **---** | **---** | **---** | **---** | **R.FVMRNRDVVLTTTFVDDIK.A** |

  


---

|  |  |
| --- | --- |
| **47.** | P01031    **Mass:** 226070   **Score:** 45     **Queries matched:** 5   **emPAI:** 0.02 |
|  | Complement C5 OS=Homo sapiens GN=C5 PE=1 SV=4 |

|  |  |  |  |  |  |
| --- | --- | --- | --- | --- | --- |
|  | **Quantitation:** | **Ratio** | **Weighted** | **N** | **SD(geo)** |
|  |  | Patient3-Art/Control | --- | 1 | --- |
|  |  | Patient3-Porta/Control | --- | 1 | --- |
|  |  | Patient3-Hepa/Control | --- | 1 | --- |
|  |  | Patient2-Art/Control | --- | 1 | --- |
|  |  | Patient2-Porta/Control | --- | 1 | --- |
|  |  | Patient2-Hepa/Control | --- | 1 | --- |

|  |  |  |  |  |  |  |  |  |  |  |  |  |  |  |  |  |
| --- | --- | --- | --- | --- | --- | --- | --- | --- | --- | --- | --- | --- | --- | --- | --- | --- |
|  | **Query** | **Observed** | **Mr(expt)** | **Mr(calc)** | **Delta** | **Miss** | **Score** | **Expect** | **Rank** | **Patient3-Art/Control** | **Patient3-Porta/Control** | **Patient3-Hepa/Control** | **Patient2-Art/Control** | **Patient2-Porta/Control** | **Patient2-Hepa/Control** | **Peptide** |
|  | 2817 | 694.34 | 1386.66 | 1386.81 | -0.15 | 0 | 12 | 3.5 | 2 | --- | --- | --- | --- | --- | --- | K.LQGTLPVEAR.E 2818 |
|  | 7305 | **798.10** | **2391.29** | **2391.35** | **-0.06** | **0** | **45** | **0.002** | **1** | **1.305** | **1.750** | **2.705** | **2.637** | **0.876** | **2.965** | **R.MVETTAYALLTSLNLK.D** |
|  | 9525 | **745.94** | **2979.74** | **2979.80** | **-0.05** | **2** | **1** | **44** | **7** | **---** | **---** | **---** | **---** | **---** | **---** | **K.GRQYLIMGKEALQIK.Y** |
|  | 10875 | **995.00** | **3975.97** | **3976.07** | **-0.10** | **0** | **1** | **26** | **3** | **---** | **---** | **---** | **---** | **---** | **---** | **K.DSLDQLVGGVPVTLNAQTIDVNQETSDLDPSK.S** |

  


---

|  |  |
| --- | --- |
| **48.** | Patient33645    **Mass:** 66303    **Score:** 45     **Queries matched:** 9   **emPAI:** 0.06 |
|  | Keratin, type I cytoskeletal 10 OS=Homo sapiens GN=KRT10 PE=1 SV=5 |

|  |  |  |  |  |  |
| --- | --- | --- | --- | --- | --- |
|  | **Quantitation:** | **Ratio** | **Weighted** | **N** | **SD(geo)** |
|  |  | Patient3-Art/Control | --- | 1 | --- |
|  |  | Patient3-Porta/Control | --- | 1 | --- |
|  |  | Patient3-Hepa/Control | --- | 1 | --- |
|  |  | Patient2-Art/Control | --- | 1 | --- |
|  |  | Patient2-Porta/Control | --- | 1 | --- |
|  |  | Patient2-Hepa/Control | --- | 1 | --- |

|  |  |  |  |  |  |  |  |  |  |  |  |  |  |  |  |  |
| --- | --- | --- | --- | --- | --- | --- | --- | --- | --- | --- | --- | --- | --- | --- | --- | --- |
|  | **Query** | **Observed** | **Mr(expt)** | **Mr(calc)** | **Delta** | **Miss** | **Score** | **Expect** | **Rank** | **Patient3-Art/Control** | **Patient3-Porta/Control** | **Patient3-Hepa/Control** | **Patient2-Art/Control** | **Patient2-Porta/Control** | **Patient2-Hepa/Control** | **Peptide** |
|  | 1348 | **556.28** | **1110.55** | **1110.60** | **-0.04** | **0** | **32** | **0.089** | **1** | **---** | **---** | **---** | **---** | **---** | **---** | **R.LAADDFR.L** 1349 1350 1352 1353 |
|  | 5623 | 691.08 | 2070.22 | 2070.21 | 0.01 | 1 | (0) | 63 | 6 | --- | --- | --- | --- | --- | --- | K.YYKTIDDLK.N |
|  | 7252 | **792.45** | **2374.33** | **2374.42** | **-0.09** | **1** | **5** | **21** | **1** | **---** | **---** | **---** | **---** | **---** | **---** | **K.YYKTIDDLK.N** 7257 |
|  | 7359 | 802.46 | 2404.36 | 2404.42 | -0.05 | 0 | 45 | 0.0021 | 1 | 0.764 | 0.406 | 0.984 | 1.209 | 0.323 | 1.400 | R.NVQALEIELQSQLALK.Q |

  


---

|  |  |
| --- | --- |
| **49.** | P02753    **Mass:** 26922    **Score:** 45     **Queries matched:** 3   **emPAI:** 0.16 |
|  | Retinol-binding protein 4 OS=Homo sapiens GN=RBP4 PE=1 SV=3 |

|  |  |  |  |  |  |
| --- | --- | --- | --- | --- | --- |
|  | **Quantitation:** | **Ratio** | **Weighted** | **N** | **SD(geo)** |
|  |  | Patient3-Art/Control | --- | 1 | --- |
|  |  | Patient3-Porta/Control | --- | 1 | --- |
|  |  | Patient3-Hepa/Control | --- | 1 | --- |
|  |  | Patient2-Art/Control | --- | 1 | --- |
|  |  | Patient2-Porta/Control | --- | 1 | --- |
|  |  | Patient2-Hepa/Control | --- | 1 | --- |

|  |  |  |  |  |  |  |  |  |  |  |  |  |  |  |  |  |
| --- | --- | --- | --- | --- | --- | --- | --- | --- | --- | --- | --- | --- | --- | --- | --- | --- |
|  | **Query** | **Observed** | **Mr(expt)** | **Mr(calc)** | **Delta** | **Miss** | **Score** | **Expect** | **Rank** | **Patient3-Art/Control** | **Patient3-Porta/Control** | **Patient3-Hepa/Control** | **Patient2-Art/Control** | **Patient2-Porta/Control** | **Patient2-Hepa/Control** | **Peptide** |
|  | 2474 | **656.34** | **1310.66** | **1310.66** | **-0.00** | **0** | **12** | **4.8** | **2** | **---** | **---** | **---** | **---** | **---** | **---** | **R.QEELCLAR.Q** |
|  | 4475 | **603.03** | **1806.07** | **1806.03** | **0.05** | **0** | **32** | **0.035** | **1** | **1.197** | **0.946** | **0.839** | **0.897** | **1.753** | **1.369** | **K.YWGVASFLQK.G** 4473 |

  


---

|  |  |
| --- | --- |
| **50.** | P68871    **Mass:** 19731    **Score:** 44     **Queries matched:** 6   **emPAI:** 0.22 |
|  | Hemoglobin subunit beta OS=Homo sapiens GN=HBB PE=1 SV=2 |

|  |  |  |  |  |  |
| --- | --- | --- | --- | --- | --- |
|  | **Quantitation:** | **Ratio** | **Weighted** | **N** | **SD(geo)** |
|  |  | Patient3-Art/Control | --- | 0 | --- |
|  |  | Patient3-Porta/Control | --- | 1 | --- |
|  |  | Patient3-Hepa/Control | --- | 1 | --- |
|  |  | Patient2-Art/Control | --- | 1 | --- |
|  |  | Patient2-Porta/Control | --- | 1 | --- |
|  |  | Patient2-Hepa/Control | --- | 1 | --- |

|  |  |  |  |  |  |  |  |  |  |  |  |  |  |  |  |  |
| --- | --- | --- | --- | --- | --- | --- | --- | --- | --- | --- | --- | --- | --- | --- | --- | --- |
|  | **Query** | **Observed** | **Mr(expt)** | **Mr(calc)** | **Delta** | **Miss** | **Score** | **Expect** | **Rank** | **Patient3-Art/Control** | **Patient3-Porta/Control** | **Patient3-Hepa/Control** | **Patient2-Art/Control** | **Patient2-Porta/Control** | **Patient2-Hepa/Control** | **Peptide** |
|  | 3663 | **809.92** | **1617.83** | **1617.86** | **-0.03** | **0** | **15** | **1.6** | **1** | **---** | **---** | **---** | **---** | **---** | **---** | **K.VNVDEVGGEALGR.L** 3661 3664 3665 |
|  | 4870 | **628.37** | **1882.09** | **1882.13** | **-0.04** | **0** | **13** | **3.1** | **2** | **---** | **---** | **---** | **---** | **---** | **---** | **R.LLVVYPWTQR.F** |
|  | 8592 | **895.08** | **2682.21** | **2682.35** | **-0.14** | **0** | **44** | **0.00078** | **1** | **-0.070** | **1.631** | **2.647** | **0.924** | **8.362** | **1.780** | **R.FFESFGDLSTPDAVMGNPK.V** |

  


---

|  |  |
| --- | --- |
| **51.** | Patient30643    **Mass:** 110939   **Score:** 43     **Queries matched:** 3   **emPAI:** 0.04 |
|  | Complement component C7 OS=Homo sapiens GN=C7 PE=1 SV=2 |

|  |  |  |  |  |  |
| --- | --- | --- | --- | --- | --- |
|  | **Quantitation:** | **Ratio** | **Weighted** | **N** | **SD(geo)** |
|  |  | Patient3-Art/Control | --- | 0 | --- |
|  |  | Patient3-Porta/Control | --- | 0 | --- |
|  |  | Patient3-Hepa/Control | --- | 0 | --- |
|  |  | Patient2-Art/Control | --- | 0 | --- |
|  |  | Patient2-Porta/Control | --- | 0 | --- |
|  |  | Patient2-Hepa/Control | --- | 0 | --- |

|  |  |  |  |  |  |  |  |  |  |  |  |  |  |  |  |  |
| --- | --- | --- | --- | --- | --- | --- | --- | --- | --- | --- | --- | --- | --- | --- | --- | --- |
|  | **Query** | **Observed** | **Mr(expt)** | **Mr(calc)** | **Delta** | **Miss** | **Score** | **Expect** | **Rank** | **Patient3-Art/Control** | **Patient3-Porta/Control** | **Patient3-Hepa/Control** | **Patient2-Art/Control** | **Patient2-Porta/Control** | **Patient2-Hepa/Control** | **Peptide** |
|  | 3978 | **562.00** | **1682.97** | **1683.04** | **-0.08** | **0** | **29** | **0.078** | **1** | **---** | **---** | **---** | **---** | **---** | **---** | **K.LTPLYELVK.E** 3979 3980 |

  


---

|  |  |
| --- | --- |
| **52.** | P05156    **Mass:** 80993    **Score:** 43     **Queries matched:** 1   **emPAI:** 0.05 |
|  | Complement factor I OS=Homo sapiens GN=CFI PE=1 SV=1 |

|  |  |  |  |  |  |
| --- | --- | --- | --- | --- | --- |
|  | **Quantitation:** | **Ratio** | **Weighted** | **N** | **SD(geo)** |
|  |  | Patient3-Art/Control | --- | 1 | --- |
|  |  | Patient3-Porta/Control | --- | 1 | --- |
|  |  | Patient3-Hepa/Control | --- | 1 | --- |
|  |  | Patient2-Art/Control | --- | 1 | --- |
|  |  | Patient2-Porta/Control | --- | 1 | --- |
|  |  | Patient2-Hepa/Control | --- | 1 | --- |

|  |  |  |  |  |  |  |  |  |  |  |  |  |  |  |  |  |
| --- | --- | --- | --- | --- | --- | --- | --- | --- | --- | --- | --- | --- | --- | --- | --- | --- |
|  | **Query** | **Observed** | **Mr(expt)** | **Mr(calc)** | **Delta** | **Miss** | **Score** | **Expect** | **Rank** | **Patient3-Art/Control** | **Patient3-Porta/Control** | **Patient3-Hepa/Control** | **Patient2-Art/Control** | **Patient2-Porta/Control** | **Patient2-Hepa/Control** | **Peptide** |
|  | 5539 | **685.35** | **2053.03** | **2053.07** | **-0.04** | **0** | **43** | **0.0029** | **1** | **1.247** | **1.723** | **1.303** | **2.141** | **1.275** | **2.174** | **R.GLETSLAECTFTK.R** |

  


---

|  |  |
| --- | --- |
| **53.** | P05452    **Mass:** 28046    **Score:** 38     **Queries matched:** 2   **emPAI:** 0.16 |
|  | Tetranectin OS=Homo sapiens GN=CLEC3B PE=1 SV=2 |

|  |  |  |  |  |  |
| --- | --- | --- | --- | --- | --- |
|  | **Quantitation:** | **Ratio** | **Weighted** | **N** | **SD(geo)** |
|  |  | Patient3-Art/Control | --- | 1 | --- |
|  |  | Patient3-Porta/Control | --- | 1 | --- |
|  |  | Patient3-Hepa/Control | --- | 1 | --- |
|  |  | Patient2-Art/Control | --- | 1 | --- |
|  |  | Patient2-Porta/Control | --- | 1 | --- |
|  |  | Patient2-Hepa/Control | --- | 1 | --- |

|  |  |  |  |  |  |  |  |  |  |  |  |  |  |  |  |  |
| --- | --- | --- | --- | --- | --- | --- | --- | --- | --- | --- | --- | --- | --- | --- | --- | --- |
|  | **Query** | **Observed** | **Mr(expt)** | **Mr(calc)** | **Delta** | **Miss** | **Score** | **Expect** | **Rank** | **Patient3-Art/Control** | **Patient3-Porta/Control** | **Patient3-Hepa/Control** | **Patient2-Art/Control** | **Patient2-Porta/Control** | **Patient2-Hepa/Control** | **Peptide** |
|  | 4234 | **873.45** | **1744.88** | **1744.88** | **-0.01** | **0** | **2** | **38** | **1** | **---** | **---** | **---** | **---** | **---** | **---** | **R.DQLPYICQFGIV.-** |
|  | 5024 | **641.42** | **1921.23** | **1921.17** | **0.05** | **0** | **38** | **0.0073** | **1** | **1.263** | **0.702** | **1.014** | **1.251** | **1.231** | **0.779** | **R.LDTLAQEVALLK.E** |

  


---

|  |  |
| --- | --- |
| **54.** | P02743    **Mass:** 29418    **Score:** 34     **Queries matched:** 1   **emPAI:** 0.15 |
|  | Serum amyloid P-component OS=Homo sapiens GN=APCS PE=1 SV=2 |

|  |  |  |  |  |  |
| --- | --- | --- | --- | --- | --- |
|  | **Quantitation:** | **Ratio** | **Weighted** | **N** | **SD(geo)** |
|  |  | Patient3-Art/Control | --- | 1 | --- |
|  |  | Patient3-Porta/Control | --- | 1 | --- |
|  |  | Patient3-Hepa/Control | --- | 1 | --- |
|  |  | Patient2-Art/Control | --- | 1 | --- |
|  |  | Patient2-Porta/Control | --- | 1 | --- |
|  |  | Patient2-Hepa/Control | --- | 1 | --- |

|  |  |  |  |  |  |  |  |  |  |  |  |  |  |  |  |  |
| --- | --- | --- | --- | --- | --- | --- | --- | --- | --- | --- | --- | --- | --- | --- | --- | --- |
|  | **Query** | **Observed** | **Mr(expt)** | **Mr(calc)** | **Delta** | **Miss** | **Score** | **Expect** | **Rank** | **Patient3-Art/Control** | **Patient3-Porta/Control** | **Patient3-Hepa/Control** | **Patient2-Art/Control** | **Patient2-Porta/Control** | **Patient2-Hepa/Control** | **Peptide** |
|  | 1060 | **534.79** | **1067.57** | **1067.64** | **-0.07** | **0** | **34** | **0.033** | **1** | **1.122** | **0.909** | **0.888** | **1.100** | **1.196** | **0.806** | **K.VFVFPR.E** |

  


---

|  |  |
| --- | --- |
| **55.** | P06681    **Mass:** 95574    **Score:** 31     **Queries matched:** 1   **emPAI:** 0.04 |
|  | Complement C2 OS=Homo sapiens GN=C2 PE=1 SV=2 |

|  |  |  |  |  |  |
| --- | --- | --- | --- | --- | --- |
|  | **Quantitation:** | **Ratio** | **Weighted** | **N** | **SD(geo)** |
|  |  | Patient3-Art/Control | --- | 1 | --- |
|  |  | Patient3-Porta/Control | --- | 1 | --- |
|  |  | Patient3-Hepa/Control | --- | 1 | --- |
|  |  | Patient2-Art/Control | --- | 1 | --- |
|  |  | Patient2-Porta/Control | --- | 1 | --- |
|  |  | Patient2-Hepa/Control | --- | 1 | --- |

|  |  |  |  |  |  |  |  |  |  |  |  |  |  |  |  |  |
| --- | --- | --- | --- | --- | --- | --- | --- | --- | --- | --- | --- | --- | --- | --- | --- | --- |
|  | **Query** | **Observed** | **Mr(expt)** | **Mr(calc)** | **Delta** | **Miss** | **Score** | **Expect** | **Rank** | **Patient3-Art/Control** | **Patient3-Porta/Control** | **Patient3-Hepa/Control** | **Patient2-Art/Control** | **Patient2-Porta/Control** | **Patient2-Hepa/Control** | **Peptide** |
|  | 3983 | **563.70** | **1688.07** | **1688.04** | **0.02** | **0** | **31** | **0.044** | **1** | **0.593** | **1.212** | **1.060** | **1.036** | **0.680** | **1.375** | **R.HAIILLTDGK.S** |

  


---

|  |  |
| --- | --- |
| **56.** | Q9HC10    **Mass:** 271399   **Score:** 29     **Queries matched:** 47   **emPAI:** 0.02 |
|  | Otoferlin OS=Homo sapiens GN=OTOF PE=1 SV=3 |

|  |  |  |  |  |  |
| --- | --- | --- | --- | --- | --- |
|  | **Quantitation:** | **Ratio** | **Weighted** | **N** | **SD(geo)** |
|  |  | Patient3-Art/Control | --- | 1 | --- |
|  |  | Patient3-Porta/Control | --- | 1 | --- |
|  |  | Patient3-Hepa/Control | --- | 1 | --- |
|  |  | Patient2-Art/Control | --- | 1 | --- |
|  |  | Patient2-Porta/Control | --- | 1 | --- |
|  |  | Patient2-Hepa/Control | --- | 1 | --- |

|  |  |  |  |  |  |  |  |  |  |  |  |  |  |  |  |  |
| --- | --- | --- | --- | --- | --- | --- | --- | --- | --- | --- | --- | --- | --- | --- | --- | --- |
|  | **Query** | **Observed** | **Mr(expt)** | **Mr(calc)** | **Delta** | **Miss** | **Score** | **Expect** | **Rank** | **Patient3-Art/Control** | **Patient3-Porta/Control** | **Patient3-Hepa/Control** | **Patient2-Art/Control** | **Patient2-Porta/Control** | **Patient2-Hepa/Control** | **Peptide** |
|  | 995 | **532.29** | **1062.57** | **1062.60** | **-0.03** | **0** | **29** | **0.044** | **1** | **0.844** | **0.995** | **0.738** | **0.927** | **0.871** | **1.084** | **K.IDLENR.F** 980 981 982 983 984 985 986 987 988 989 990 991 992 993 994 996 998 999 1000 1001 1002 1003 1004 1005 1006 1008 1010 1011 1012 1013 1014 1015 1016 1020 |
|  | 2998 | **711.87** | **1421.72** | **1421.83** | **-0.12** | **0** | **9** | **7.6** | **4** | **---** | **---** | **---** | **---** | **---** | **---** | **R.VEVLFWGLR.D** 2986 2988 2989 2991 2993 2995 2997 |
|  | 3117 | 726.86 | 1451.71 | 1451.80 | -0.09 | 0 | 3 | 26 | 8 | --- | --- | --- | --- | --- | --- | R.GQSFYSR.V 3119 3120 3123 |

  


---

|  |  |
| --- | --- |
| **57.** | Q5T8A7    **Mass:** 150963   **Score:** 29     **Queries matched:** 24   **emPAI:** 0.03 |
|  | Protein KIAA0649 OS=Homo sapiens GN=KIAA0649 PE=1 SV=1 |

|  |  |  |  |  |  |
| --- | --- | --- | --- | --- | --- |
|  | **Quantitation:** | **Ratio** | **Weighted** | **N** | **SD(geo)** |
|  |  | Patient3-Art/Control | --- | 1 | --- |
|  |  | Patient3-Porta/Control | --- | 1 | --- |
|  |  | Patient3-Hepa/Control | --- | 1 | --- |
|  |  | Patient2-Art/Control | --- | 1 | --- |
|  |  | Patient2-Porta/Control | --- | 1 | --- |
|  |  | Patient2-Hepa/Control | --- | 1 | --- |

|  |  |  |  |  |  |  |  |  |  |  |  |  |  |  |  |  |
| --- | --- | --- | --- | --- | --- | --- | --- | --- | --- | --- | --- | --- | --- | --- | --- | --- |
|  | **Query** | **Observed** | **Mr(expt)** | **Mr(calc)** | **Delta** | **Miss** | **Score** | **Expect** | **Rank** | **Patient3-Art/Control** | **Patient3-Porta/Control** | **Patient3-Hepa/Control** | **Patient2-Art/Control** | **Patient2-Porta/Control** | **Patient2-Hepa/Control** | **Peptide** |
|  | 2995 | 711.85 | 1421.69 | 1421.74 | -0.05 | 0 | 29 | 0.051 | 1 | 1.385 | 1.313 | 0.566 | 0.631 | 0.892 | 0.652 | K.ASEALGGEGTAR.G 2975 2977 2978 2979 2980 2981 2982 2983 2984 2985 2986 2987 2988 2989 2990 2991 2992 2993 2994 2996 2997 2998 |
|  | 7128 | 778.05 | 2331.14 | 2331.23 | -0.09 | 0 | 0 | 37 | 8 | --- | --- | --- | --- | --- | --- | R.GTESAGAQGTAGLFSQGGK.G |

  


---

|  |
| --- |
| **Mascot:**  http://www.matrixscience.com/ |

|  |  |
| --- | --- |
| |  | | --- | | Top scoring peptide matches to query 70 16: Sum of 2 scans in range 137 (rt=11.2697, f=7, i=2) to 143 (rt=11.5684, f=7, i=3) [\\172.16.3.18\masslynx\2009.PRO\Data\20090930\_41\_qdda.raw] Score greater than 18 indicates homology Score greater than 31 indicates identity  ``` Score    Expect   Delta  Hit  Protein Peptide   7.4        12   -0.05    2   P01024 TVAVR   5.6        17    0.02               GSPER   5.6        18   -0.01               K.AEIGR.R   5.6        18   -0.01               AELGR   5.6        18   -0.01               EAIGR   5.6        18   -0.01               EALGR   5.6        18   -0.05               K.ISLGR.N   5.6        18   -0.05               R.LSLGR.I   5.6        18   -0.05               K.SIIGR.L   5.6        18   -0.05               K.SLIGR.S ``` | |

|  |  |
| --- | --- |
| |  | | --- | | Top scoring peptide matches to query 260 29: Sum of 4 scans in range 269 (rt=17.7406, f=2, i=61) to 290 (rt=18.7728, f=2, i=64) [\\172.16.3.18\masslynx\2009.PRO\Data\20090915\_37\_qdda.raw] Score greater than 24 indicates homology Score greater than 29 indicates identity  ``` Score    Expect   Delta  Hit  Protein Peptide  15.0       1.6   -0.11   16   P04217 R.FALVR.E  15.0       1.6   -0.07               MALVR  10.1       4.8   -0.00               MADPR   9.0       6.2   -0.11               K.FAVIR.H   9.0       6.2   -0.07               MAVLR   6.5        11   -0.11               R.AFIVR.S   6.5        11   -0.11               R.AFLVR.S   6.5        11   -0.07               K.AMIVR.N   5.5        14   -0.11               FLAVR   5.5        14   -0.07               FSPVR ``` | |

|  |  |
| --- | --- |
| |  | | --- | | Top scoring peptide matches to query 261 28: Sum of 8 scans in range 181 (rt=13.4762, f=7, i=13) to 244 (rt=16.5761, f=5, i=16) [\\172.16.3.18\masslynx\2009.PRO\Data\20090915\_33\_qdda.raw] Score greater than 22 indicates homology Score greater than 29 indicates identity  ``` Score    Expect   Delta  Hit  Protein Peptide  12.7       2.6   -0.09   16   P04217 R.FALVR.E  12.7       2.6   -0.05               MALVR   8.6       6.7    0.02               MADPR   7.6       8.6   -0.09               K.FAVIR.H   7.6       8.6   -0.05               MAVLR   4.9        16   -0.01               K.FGPER.M   4.9        16    0.02               MGPER   4.9        16   -0.09               FLAVR   4.9        16   -0.05               FSPVR   4.9        16   -0.05               MLAVR ``` | |

|  |  |
| --- | --- |
| |  | | --- | | Top scoring peptide matches to query 262 49: Sum of 6 scans in range 284 (rt=18.4755, f=7, i=23) to 319 (rt=20.2046, f=3, i=46) [\\172.16.3.18\masslynx\2009.PRO\Data\20090917\_32\_qdda.raw] Score greater than 24 indicates homology Score greater than 29 indicates identity  ``` Score    Expect   Delta  Hit  Protein Peptide  15.8       1.3   -0.06   16   P04217 R.FALVR.E  15.8       1.3   -0.03               MALVR  10.1       4.8   -0.06               R.AFIVR.S  10.1       4.8   -0.06               R.AFLVR.S  10.1       4.8   -0.03               K.AMIVR.N   7.9       7.9   -0.06               K.FAVIR.H   7.9       7.9   -0.03               MAVLR   6.1        12   -0.06               FLAVR   6.1        12   -0.03               FSPVR   6.1        12   -0.03               MLAVR ``` | |

|  |  |
| --- | --- |
| |  | | --- | | Top scoring peptide matches to query 263 38: Sum of 12 scans in range 215 (rt=15.0468, f=4, i=18) to 285 (rt=18.4657, f=2, i=50) [\\172.16.3.18\masslynx\2009.PRO\Data\20090916\_12\_qdda.raw] Score greater than 22 indicates homology Score greater than 29 indicates identity  ``` Score    Expect   Delta  Hit  Protein Peptide  14.9       1.6   -0.06   16   P04217 R.FALVR.E  14.9       1.6   -0.03               MALVR   8.9       6.4   -0.06               K.FAVIR.H   8.9       6.4   -0.03               MAVLR   8.4         7    0.04               MADPR   6.5        11   -0.06               R.AFIVR.S   6.5        11   -0.06               R.AFLVR.S   6.5        11   -0.03               K.AMIVR.N   5.6        14   -0.06               FLAVR   5.6        14   -0.03               FSPVR ``` | |

|  |  |
| --- | --- |
| |  | | --- | | Top scoring peptide matches to query 264 48: Sum of 2 scans in range 387 (rt=23.2875, f=4, i=32) to 393 (rt=23.5862, f=4, i=33) [\\172.16.3.18\masslynx\2009.PRO\Data\20090930\_21\_qdda.raw] Score greater than 21 indicates homology Score greater than 29 indicates identity  ``` Score    Expect   Delta  Hit  Protein Peptide  15.7       1.3   -0.06   16   P04217 R.FALVR.E  15.7       1.3   -0.03               MALVR   7.8         8   -0.06               K.FAVIR.H   7.8         8   -0.03               MAVLR   6.8        10   -0.06               R.AFIVR.S   6.8        10   -0.06               R.AFLVR.S   6.8        10   -0.03               K.AMIVR.N   6.1        12   -0.06               FLAVR   6.1        12   -0.03               FSPVR   6.1        12   -0.03               MLAVR ``` | |

|  |  |
| --- | --- |
| |  | | --- | | Top scoring peptide matches to query 265 36: Sum of 6 scans in range 278 (rt=18.1838, f=7, i=27) to 316 (rt=20.0348, f=5, i=28) [\\172.16.3.18\masslynx\2009.PRO\Data\20090916\_16\_qdda.raw] Score greater than 21 indicates homology Score greater than 29 indicates identity  ``` Score    Expect   Delta  Hit  Protein Peptide  12.0       3.1   -0.05   16   P04217 R.FALVR.E  12.0       3.1   -0.02               MALVR   7.6       8.6   -0.05               K.FAVIR.H   7.6       8.6   -0.02               MAVLR   5.9        13    0.05               MADPR   5.2        15   -0.05               R.AFIVR.S   5.2        15   -0.05               R.AFLVR.S   5.2        15   -0.02               K.AMIVR.N   5.0        15   -0.05               FLAVR   5.0        15   -0.02               FSPVR ``` | |

|  |  |
| --- | --- |
| |  | | --- | | Top scoring peptide matches to query 266 74: Sum of 2 scans in range 418 (rt=24.9436, f=6, i=38) to 424 (rt=25.2423, f=6, i=39) [\\172.16.3.18\masslynx\2009.PRO\Data\20090917\_24\_qdda.raw] Score greater than 14 indicates homology Score greater than 29 indicates identity  ``` Score    Expect   Delta  Hit  Protein Peptide   5.0        15   -0.05   16   P04217 R.FALVR.E   5.0        15   -0.01               MALVR   1.1        38    0.06               MADPR   0.2        47   -0.05               K.FAVIR.H   0.2        47   -0.01               MAVLR ``` | |

|  |  |
| --- | --- |
| |  | | --- | | Top scoring peptide matches to query 267 46: Sum of 4 scans in range 330 (rt=20.7383, f=3, i=47) to 339 (rt=21.1863, f=6, i=30) [\\172.16.3.18\masslynx\2009.PRO\Data\20090917\_36\_qdda.raw] Score greater than 19 indicates homology Score greater than 29 indicates identity  ``` Score    Expect   Delta  Hit  Protein Peptide   7.6       8.5   -0.04   16   P04217 R.FALVR.E   7.6       8.5   -0.01               MALVR   6.6        11   -0.04               K.FAVIR.H   6.6        11   -0.01               MAVLR   0.8        41    0.06               MADPR ``` | |

|  |  |
| --- | --- |
| |  | | --- | | Top scoring peptide matches to query 268 66: Sum of 2 scans in range 387 (rt=23.3787, f=4, i=33) to 393 (rt=23.6774, f=4, i=34) [\\172.16.3.18\masslynx\2009.PRO\Data\20090930\_26\_qdda.raw] Score greater than 20 indicates homology Score greater than 29 indicates identity  ``` Score    Expect   Delta  Hit  Protein Peptide   9.2       5.9   -0.04   16   P04217 R.FALVR.E   9.2       5.9   -0.01               MALVR   7.5       8.7   -0.04               K.FAVIR.H   7.5       8.7   -0.01               MAVLR   4.4        18    0.03               K.FGPER.M   3.8        21    0.03               K.SPMVR.K   3.4        23   -0.04               FLAVR   3.4        23   -0.00               FSPVR   3.4        23   -0.01               MLAVR   3.4        23    0.03               -.MPSVR.S ``` | |

|  |  |
| --- | --- |
| |  | | --- | | Top scoring peptide matches to query 269 69: Sum of 2 scans in range 418 (rt=24.9841, f=4, i=50) to 424 (rt=25.2828, f=4, i=51) [\\172.16.3.18\masslynx\2009.PRO\Data\20090917\_20\_qdda.raw] Score greater than 20 indicates homology Score greater than 29 indicates identity  ``` Score    Expect   Delta  Hit  Protein Peptide   9.0       6.2   -0.04   16   P04217 R.FALVR.E   9.0       6.2   -0.01               MALVR   6.9       9.9   -0.04               K.FAVIR.H   6.9       9.9   -0.01               MAVLR   4.7        17    0.03               K.FGPER.M   3.4        22    0.03               K.SPMVR.K   3.4        23   -0.04               FLAVR   3.4        23   -0.00               FSPVR   3.4        23   -0.01               MLAVR   3.4        23    0.03               -.MPSVR.S ``` | |

|  |  |
| --- | --- |
| |  | | --- | | Top scoring peptide matches to query 270 34: Sum of 2 scans in range 215 (rt=15.1215, f=7, i=19) to 221 (rt=15.4202, f=7, i=20) [\\172.16.3.18\masslynx\2009.PRO\Data\20090916\_16\_qdda.raw] Score greater than 21 indicates homology Score greater than 29 indicates identity  ``` Score    Expect   Delta  Hit  Protein Peptide  11.5       3.5   -0.03   16   P04217 R.FALVR.E  11.5       3.5    0.00               MALVR   7.9         8   -0.03               K.FAVIR.H   7.9         8    0.00               MAVLR   5.7        13    0.08               MADPR   5.2        15   -0.03               FLAVR   5.2        15    0.01               FSPVR   5.2        15    0.00               MLAVR   5.2        15    0.04               -.MPSVR.S   5.2        15    0.04               -.MSPVR.R ``` | |

|  |  |
| --- | --- |
| |  | | --- | | Top scoring peptide matches to query 271 32: Sum of 2 scans in range 185 (rt=13.6543, f=6, i=14) to 191 (rt=13.953, f=6, i=15) [\\172.16.3.18\masslynx\2009.PRO\Data\20090916\_16\_qdda.raw] Score greater than 20 indicates homology Score greater than 29 indicates identity  ``` Score    Expect   Delta  Hit  Protein Peptide  11.6       3.4   -0.03   16   P04217 R.FALVR.E  11.6       3.4    0.01               MALVR   6.3        11   -0.03               K.FAVIR.H   6.3        11    0.08               MADPR   6.3        11    0.01               MAVLR   6.0        12    0.04               K.SPMVR.K   5.3        14   -0.03               FLAVR   5.3        14    0.01               FSPVR   5.3        14    0.01               MLAVR   5.3        14    0.04               -.MPSVR.S ``` | |

|  |  |
| --- | --- |
| |  | | --- | | Top scoring peptide matches to query 272 30: Sum of 41 scans in range 207 (rt=14.7555, f=7, i=15) to 346 (rt=21.5175, f=6, i=27) [\\172.16.3.18\masslynx\2009.PRO\Data\20090930\_16\_qdda.raw] Score greater than 23 indicates homology Score greater than 29 indicates identity  ``` Score    Expect   Delta  Hit  Protein Peptide  14.7       1.7   -0.02   16   P04217 R.FALVR.E  14.7       1.7    0.01               MALVR   9.8       5.2   -0.02               K.FAVIR.H   9.8       5.2    0.01               MAVLR   7.4         9    0.09               MADPR   7.0       9.9   -0.02               FLAVR   7.0       9.9    0.02               FSPVR   7.0       9.9    0.01               MLAVR   7.0       9.9    0.05               -.MPSVR.S   7.0       9.9    0.05               -.MSPVR.R ``` | |

|  |  |
| --- | --- |
| |  | | --- | | Top scoring peptide matches to query 273 62: Sum of 2 scans in range 388 (rt=23.4902, f=5, i=29) to 394 (rt=23.7889, f=5, i=30) [\\172.16.3.18\masslynx\2009.PRO\Data\20090930\_31\_qdda.raw] Score greater than 19 indicates homology Score greater than 29 indicates identity  ``` Score    Expect   Delta  Hit  Protein Peptide  11.1       3.8   -0.02   16   P04217 R.FALVR.E  11.1       3.8    0.01               MALVR   6.2        12   -0.02               K.FAVIR.H   6.2        12    0.09               MADPR   6.2        12    0.01               MAVLR   4.5        18   -0.02               FLAVR   4.5        18    0.01               MLAVR   3.4        22   -0.02               R.AFIVR.S   3.4        22   -0.02               R.AFLVR.S   3.4        22    0.01               K.AMIVR.N ``` | |

|  |  |
| --- | --- |
| |  | | --- | | Top scoring peptide matches to query 274 102: Sum of 2 scans in range 484 (rt=27.9629, f=7, i=42) to 489 (rt=28.2118, f=7, i=43) [\\172.16.3.18\masslynx\2009.PRO\Data\20090917\_12\_qdda.raw] Score greater than 13 indicates homology Score greater than 29 indicates identity  ``` Score    Expect   Delta  Hit  Protein Peptide   0.9        40   -0.00   16   P04217 R.FALVR.E   0.9        40    0.03               MALVR ``` | |

|  |  |
| --- | --- |
| |  | | --- | | Top scoring peptide matches to query 275 56: Scan 404 (rt=23.9864, f=6, i=19) [\\172.16.3.18\masslynx\2009.PRO\Data\20090930\_41\_qdda.raw] Score greater than 18 indicates homology Score greater than 29 indicates identity  ``` Score    Expect   Delta  Hit  Protein Peptide   7.4       8.9   -0.00   16   P04217 R.FALVR.E   7.4       8.9    0.03               MALVR   5.2        15   -0.00               K.FAVIR.H   5.2        15    0.10               MADPR   5.2        15    0.03               MAVLR   1.5        34   -0.00               FLAVR   1.5        34    0.03               FSPVR   1.5        34    0.03               MLAVR   1.5        34    0.07               -.MPSVR.S   1.5        34    0.07               -.MSPVR.R ``` | |

|  |  |
| --- | --- |
| |  | | --- | | Top scoring peptide matches to query 365 40: Sum of 4 scans in range 334 (rt=21.0097, f=3, i=50) to 352 (rt=21.9073, f=3, i=53) [\\172.16.3.18\masslynx\2009.PRO\Data\20090915\_33\_qdda.raw] Score greater than 26 indicates homology Score greater than 27 indicates identity  ``` Score    Expect   Delta  Hit  Protein Peptide  17.4       0.5   -0.19    1   P01023 K.VIFIR.G  17.4       0.5   -0.19               VLFLR  17.4       0.5   -0.16               R.VLMLR.N  12.2       1.7   -0.19               R.VIIFR.L  12.2       1.7   -0.19               VLLFR  10.8       2.3   -0.12               VIMER  10.8       2.3   -0.12               K.VLEMR.G  10.8       2.3   -0.12               R.VLMER.N  10.8       2.3   -0.15               R.VLYPR.V  10.0       2.8   -0.16               K.IVMIR.D ``` | |

|  |  |
| --- | --- |
| |  | | --- | | Top scoring peptide matches to query 367 60: Sum of 8 scans in range 373 (rt=22.8533, f=2, i=71) to 394 (rt=23.8988, f=5, i=42) [\\172.16.3.18\masslynx\2009.PRO\Data\20090917\_32\_qdda.raw] Score greater than 26 indicates homology Score greater than 28 indicates identity  ``` Score    Expect   Delta  Hit  Protein Peptide  17.6      0.64   -0.14    1   P01023 K.VIFIR.G  17.6      0.64   -0.14               VLFLR  17.6      0.64   -0.11               R.VLMLR.N  12.4       2.2   -0.14               R.VIIFR.L  12.4       2.2   -0.14               VLLFR  10.9         3   -0.07               VIMER  10.9         3   -0.07               K.VLEMR.G  10.9         3   -0.07               R.VLMER.N  10.9         3   -0.11               R.VLYPR.V  10.1       3.6   -0.11               K.IVMIR.D ``` | |

|  |  |
| --- | --- |
| |  | | --- | | Top scoring peptide matches to query 368 54: Sum of 6 scans in range 341 (rt=21.2069, f=2, i=57) to 357 (rt=22.0035, f=2, i=60) [\\172.16.3.18\masslynx\2009.PRO\Data\20090916\_12\_qdda.raw] Score greater than 26 indicates homology Score greater than 28 indicates identity  ``` Score    Expect   Delta  Hit  Protein Peptide  17.6      0.65   -0.14    1   P01023 K.VIFIR.G  17.6      0.65   -0.14               VLFLR  17.6      0.65   -0.11               R.VLMLR.N  12.3       2.2   -0.14               R.VIIFR.L  12.3       2.2   -0.14               VLLFR  10.9         3   -0.07               VIMER  10.9         3   -0.07               K.VLEMR.G  10.9         3   -0.07               R.VLMER.N  10.9         3   -0.10               R.VLYPR.V  10.3       3.5   -0.11               K.IVMIR.D ``` | |

|  |  |
| --- | --- |
| |  | | --- | | Top scoring peptide matches to query 369 42: Sum of 2 scans in range 349 (rt=21.6708, f=2, i=71) to 355 (rt=21.9695, f=2, i=72) [\\172.16.3.18\masslynx\2009.PRO\Data\20090915\_37\_qdda.raw] Score greater than 28 indicates identity  ``` Score    Expect   Delta  Hit  Protein Peptide  18.9      0.48   -0.14    1   P01023 K.VIFIR.G  18.9      0.48   -0.14               VLFLR  18.9      0.48   -0.10               R.VLMLR.N  15.1       1.2   -0.10               K.IVMIR.D  15.1       1.2   -0.14               K.LVFIR.N  10.1       3.6   -0.14               R.VIIFR.L  10.1       3.6   -0.14               VLLFR   9.9       3.7   -0.07               VIMER   9.9       3.7   -0.07               R.VLMER.N   9.3       4.4   -0.14               K.VFIIR.K ``` | |

|  |  |
| --- | --- |
| |  | | --- | | Top scoring peptide matches to query 370 47: Sum of 2 scans in range 364 (rt=22.2282, f=4, i=34) to 370 (rt=22.5271, f=4, i=35) [\\172.16.3.18\masslynx\2009.PRO\Data\20090915\_29\_qdda.raw] Score greater than 26 indicates homology Score greater than 28 indicates identity  ``` Score    Expect   Delta  Hit  Protein Peptide  17.8      0.62   -0.13    1   P01023 K.VIFIR.G  17.8      0.62   -0.13               VLFLR  17.8      0.62   -0.09               R.VLMLR.N  12.5       2.1   -0.13               R.VIIFR.L  12.5       2.1   -0.13               VLLFR  11.1       2.9   -0.06               VIMER  11.1       2.9   -0.06               K.VLEMR.G  11.1       2.9   -0.06               R.VLMER.N  11.1       2.9   -0.09               R.VLYPR.V  10.7       3.1   -0.09               K.IVMIR.D ``` | |

|  |  |
| --- | --- |
| |  | | --- | | Top scoring peptide matches to query 372 55: Sum of 6 scans in range 427 (rt=25.2522, f=3, i=49) to 459 (rt=26.8321, f=2, i=79) [\\172.16.3.18\masslynx\2009.PRO\Data\20090930\_21\_qdda.raw] Score greater than 26 indicates homology Score greater than 28 indicates identity  ``` Score    Expect   Delta  Hit  Protein Peptide  24.2      0.14   -0.12    1   P01023 K.VIFIR.G  24.2      0.14   -0.12               VLFLR  24.2      0.14   -0.08               R.VLMLR.N  12.3       2.2   -0.12               R.VIIFR.L  12.3       2.2   -0.12               VLLFR  11.9       2.4   -0.05               R.VEMIR.Q  11.9       2.4   -0.05               K.VEMLR.L  11.9       2.4   -0.12               K.VFIIR.K  11.9       2.4   -0.12               K.VFLLR.R  11.9       2.4   -0.08               R.VMIIR.T ``` | |

|  |  |
| --- | --- |
| |  | | --- | | Top scoring peptide matches to query 373 39: Sum of 8 scans in range 353 (rt=21.8507, f=4, i=38) to 392 (rt=23.7789, f=3, i=53) [\\172.16.3.18\masslynx\2009.PRO\Data\20090916\_16\_qdda.raw] Score greater than 26 indicates homology Score greater than 28 indicates identity  ``` Score    Expect   Delta  Hit  Protein Peptide  17.6      0.64   -0.11    1   P01023 K.VIFIR.G  17.6      0.64   -0.11               VLFLR  17.6      0.64   -0.08               R.VLMLR.N  12.4       2.1   -0.11               R.VIIFR.L  12.4       2.1   -0.11               VLLFR  10.9         3   -0.04               VIMER  10.9         3   -0.04               K.VLEMR.G  10.9         3   -0.04               R.VLMER.N  10.9         3   -0.08               R.VLYPR.V  10.2       3.5   -0.08               K.IVMIR.D ``` | |

|  |  |
| --- | --- |
| |  | | --- | | Top scoring peptide matches to query 374 74: Sum of 6 scans in range 429 (rt=25.4431, f=2, i=75) to 444 (rt=26.1899, f=2, i=78) [\\172.16.3.18\masslynx\2009.PRO\Data\20090930\_26\_qdda.raw] Score greater than 26 indicates homology Score greater than 28 indicates identity  ``` Score    Expect   Delta  Hit  Protein Peptide  24.2      0.14   -0.11    1   P01023 K.VIFIR.G  24.2      0.14   -0.11               VLFLR  24.2      0.14   -0.08               R.VLMLR.N  12.3       2.2   -0.11               R.VIIFR.L  12.3       2.2   -0.11               VLLFR  11.9       2.4   -0.04               R.VEMIR.Q  11.9       2.4   -0.04               K.VEMLR.L  11.9       2.4   -0.11               K.VFIIR.K  11.9       2.4   -0.11               K.VFLLR.R  11.9       2.4   -0.08               R.VMIIR.T ``` | |

|  |  |
| --- | --- |
| |  | | --- | | Top scoring peptide matches to query 375 104: Sum of 2 scans in range 467 (rt=27.4145, f=4, i=56) to 473 (rt=27.7132, f=4, i=57) [\\172.16.3.18\masslynx\2009.PRO\Data\20090915\_13\_qdda.raw] Score greater than 28 indicates identity  ``` Score    Expect   Delta  Hit  Protein Peptide  24.8      0.12   -0.11    1   P01023 K.VIFIR.G  24.8      0.12   -0.11               VLFLR  24.8      0.12   -0.08               R.VLMLR.N  14.9       1.2   -0.08               K.IVMIR.D  14.9       1.2   -0.11               K.LVFIR.N  14.1       1.4   -0.11               K.VFIIR.K  14.1       1.4   -0.11               K.VFLLR.R  14.1       1.4   -0.08               R.VMIIR.T  14.1       1.4   -0.08               R.VMLLR.G  12.9       1.9   -0.11               R.VIIFR.L ``` | |

|  |  |
| --- | --- |
| |  | | --- | | Top scoring peptide matches to query 376 62: Sum of 2 scans in range 392 (rt=23.8528, f=3, i=52) to 398 (rt=24.1514, f=3, i=53) [\\172.16.3.18\masslynx\2009.PRO\Data\20090916\_20\_qdda.raw] Score greater than 26 indicates homology Score greater than 28 indicates identity  ``` Score    Expect   Delta  Hit  Protein Peptide  17.6      0.64   -0.09    1   P01023 K.VIFIR.G  17.6      0.64   -0.09               VLFLR  17.6      0.64   -0.06               R.VLMLR.N  12.4       2.2   -0.09               R.VIIFR.L  12.4       2.2   -0.09               VLLFR  10.9         3   -0.02               VIMER  10.9         3   -0.02               K.VLEMR.G  10.9         3   -0.02               R.VLMER.N  10.9         3   -0.05               R.VLYPR.V  10.1       3.6   -0.06               K.IVMIR.D ``` | |

|  |  |
| --- | --- |
| |  | | --- | | Top scoring peptide matches to query 377 61: Sum of 4 scans in range 381 (rt=23.2852, f=2, i=83) to 399 (rt=24.1812, f=2, i=86) [\\172.16.3.18\masslynx\2009.PRO\Data\20090917\_28\_qdda.raw] Score greater than 26 indicates homology Score greater than 28 indicates identity  ``` Score    Expect   Delta  Hit  Protein Peptide  17.6      0.65   -0.09    1   P01023 K.VIFIR.G  17.6      0.65   -0.09               VLFLR  17.6      0.65   -0.06               R.VLMLR.N  12.3       2.2   -0.09               R.VIIFR.L  12.3       2.2   -0.09               VLLFR  10.9         3   -0.02               VIMER  10.9         3   -0.02               K.VLEMR.G  10.9         3   -0.02               R.VLMER.N  10.9         3   -0.05               R.VLYPR.V  10.1       3.6   -0.06               K.IVMIR.D ``` | |

|  |  |
| --- | --- |
| |  | | --- | | Top scoring peptide matches to query 378 82: Sum of 2 scans in range 423 (rt=25.2908, f=6, i=47) to 429 (rt=25.5895, f=6, i=48) [\\172.16.3.18\masslynx\2009.PRO\Data\20090915\_21\_qdda.raw] Score greater than 26 indicates homology Score greater than 28 indicates identity  ``` Score    Expect   Delta  Hit  Protein Peptide  17.7      0.62   -0.09    1   P01023 K.VIFIR.G  17.7      0.62   -0.09               VLFLR  17.7      0.62   -0.06               R.VLMLR.N  12.0       2.3   -0.09               K.VFIIR.K  12.0       2.3   -0.09               K.VFLLR.R  12.0       2.3   -0.06               R.VMIIR.T  12.0       2.3   -0.06               R.VMLLR.G  10.9         3   -0.06               K.IVMIR.D  10.9         3   -0.09               K.LVFIR.N  10.4       3.4   -0.02               R.VEMIR.Q ``` | |

|  |  |
| --- | --- |
| |  | | --- | | Top scoring peptide matches to query 379 55: Sum of 11 scans in range 408 (rt=24.5509, f=2, i=87) to 438 (rt=26.0312, f=5, i=54) [\\172.16.3.18\masslynx\2009.PRO\Data\20090930\_16\_qdda.raw] Score greater than 20 indicates homology Score greater than 28 indicates identity  ``` Score    Expect   Delta  Hit  Protein Peptide   9.8       3.9   -0.08    1   P01023 K.VIFIR.G   9.8       3.9   -0.08               VLFLR   9.8       3.9   -0.05               R.VLMLR.N   6.9       7.6   -0.05               MVILR   6.9       7.6   -0.05               MVLLR   6.7       7.9   -0.08               R.VIIFR.L   6.7       7.9   -0.08               VLLFR   6.6         8   -0.08               K.VFIIR.K   6.6         8   -0.08               K.VFLLR.R   6.6         8   -0.05               R.VMIIR.T ``` | |

|  |  |
| --- | --- |
| |  | | --- | | Top scoring peptide matches to query 380 89: Sum of 2 scans in range 453 (rt=26.7328, f=4, i=56) to 459 (rt=27.0315, f=4, i=57) [\\172.16.3.18\masslynx\2009.PRO\Data\20090916\_32\_qdda.raw] Score greater than 26 indicates homology Score greater than 28 indicates identity  ``` Score    Expect   Delta  Hit  Protein Peptide  18.9      0.47   -0.08    1   P01023 K.VIFIR.G  18.9      0.47   -0.08               VLFLR  18.9      0.47   -0.04               R.VLMLR.N  12.0       2.3   -0.04               K.IVMIR.D  12.0       2.3   -0.08               K.LVFIR.N  12.0       2.3   -0.08               R.VIIFR.L  12.0       2.3   -0.01               VIMER  12.0       2.3   -0.01               K.VLEMR.G  12.0       2.3   -0.08               VLLFR  12.0       2.3   -0.01               R.VLMER.N ``` | |

|  |  |
| --- | --- |
| |  | | --- | | Top scoring peptide matches to query 381 73: Sum of 4 scans in range 437 (rt=25.9168, f=2, i=77) to 454 (rt=26.7631, f=2, i=80) [\\172.16.3.18\masslynx\2009.PRO\Data\20090917\_20\_qdda.raw] Score greater than 27 indicates homology Score greater than 28 indicates identity  ``` Score    Expect   Delta  Hit  Protein Peptide  24.2      0.14   -0.07    1   P01023 K.VIFIR.G  24.2      0.14   -0.07               VLFLR  24.2      0.14   -0.04               R.VLMLR.N  13.5       1.7   -0.07               K.VFIIR.K  13.5       1.7   -0.07               K.VFLLR.R  13.5       1.7   -0.04               R.VMIIR.T  13.5       1.7   -0.04               R.VMLLR.G  12.3       2.2   -0.07               R.VIIFR.L  12.3       2.2   -0.07               VLLFR  11.9       2.4    0.00               R.VEMIR.Q ``` | |

|  |  |
| --- | --- |
| |  | | --- | | Top scoring peptide matches to query 382 72: Sum of 2 scans in range 425 (rt=25.3578, f=5, i=38) to 431 (rt=25.6565, f=5, i=39) [\\172.16.3.18\masslynx\2009.PRO\Data\20090916\_28\_qdda.raw] Score greater than 28 indicates identity  ``` Score    Expect   Delta  Hit  Protein Peptide  23.3      0.17   -0.06    1   P01023 K.VIFIR.G  23.3      0.17   -0.06               VLFLR  23.3      0.17   -0.03               R.VLMLR.N  18.3      0.55   -0.03               K.IVMIR.D  18.3      0.55   -0.06               K.LVFIR.N  13.7       1.6   -0.06               K.VFIIR.K  13.7       1.6   -0.06               K.VFLLR.R  13.7       1.6   -0.03               R.VMIIR.T  13.7       1.6   -0.03               R.VMLLR.G  13.7       1.6    0.01               VIMER ``` | |

|  |  |
| --- | --- |
| |  | | --- | | Top scoring peptide matches to query 383 96: Sum of 2 scans in range 481 (rt=27.9608, f=5, i=53) to 487 (rt=28.2595, f=5, i=54) [\\172.16.3.18\masslynx\2009.PRO\Data\20090915\_17\_qdda.raw] Score greater than 21 indicates homology Score greater than 28 indicates identity  ``` Score    Expect   Delta  Hit  Protein Peptide  12.2       2.2   -0.06    1   P01023 K.VIFIR.G  12.2       2.2   -0.06               VLFLR  12.2       2.2   -0.03               R.VLMLR.N   7.6       6.4   -0.03               K.IVMIR.D   7.6       6.4   -0.06               K.LVFIR.N   7.5       6.6   -0.06               R.VIIFR.L   7.5       6.6   -0.06               VLLFR   6.4       8.4    0.01               VIMER   6.4       8.4    0.01               K.VLEMR.G   6.4       8.4    0.01               R.VLMER.N ``` | |

|  |  |
| --- | --- |
| |  | | --- | | Top scoring peptide matches to query 384 77: Sum of 2 scans in range 440 (rt=26.0256, f=3, i=66) to 446 (rt=26.3243, f=3, i=67) [\\172.16.3.18\masslynx\2009.PRO\Data\20090917\_24\_qdda.raw] Score greater than 27 indicates homology Score greater than 28 indicates identity  ``` Score    Expect   Delta  Hit  Protein Peptide  24.1      0.14   -0.06    1   P01023 K.VIFIR.G  24.1      0.14   -0.06               VLFLR  24.1      0.14   -0.03               R.VLMLR.N  13.4       1.7   -0.06               K.VFIIR.K  13.4       1.7   -0.06               K.VFLLR.R  13.4       1.7   -0.03               R.VMIIR.T  13.4       1.7   -0.03               R.VMLLR.G  12.3       2.2   -0.06               R.VIIFR.L  12.3       2.2   -0.06               VLLFR  11.8       2.5    0.01               R.VEMIR.Q ``` | |

|  |  |
| --- | --- |
| |  | | --- | | Top scoring peptide matches to query 385 80: Sum of 2 scans in range 479 (rt=27.7764, f=2, i=81) to 485 (rt=28.0751, f=2, i=82) [\\172.16.3.18\masslynx\2009.PRO\Data\20090917\_16\_qdda.raw] Score greater than 26 indicates homology Score greater than 28 indicates identity  ``` Score    Expect   Delta  Hit  Protein Peptide  17.6      0.65   -0.05    1   P01023 K.VIFIR.G  17.6      0.65   -0.05               VLFLR  17.6      0.65   -0.02               R.VLMLR.N  12.3       2.2   -0.05               R.VIIFR.L  12.3       2.2   -0.05               VLLFR  10.8       3.1    0.02               VIMER  10.8       3.1    0.02               K.VLEMR.G  10.8       3.1    0.02               R.VLMER.N  10.8       3.1   -0.01               R.VLYPR.V  10.2       3.6   -0.02               K.IVMIR.D ``` | |

|  |  |
| --- | --- |
| |  | | --- | | Top scoring peptide matches to query 386 112: Sum of 2 scans in range 475 (rt=27.716, f=4, i=58) to 481 (rt=28.0147, f=4, i=59) [\\172.16.3.18\masslynx\2009.PRO\Data\20090915\_09\_qdda.raw] Score greater than 22 indicates homology Score greater than 28 indicates identity  ``` Score    Expect   Delta  Hit  Protein Peptide  13.8       1.5   -0.05               R.VIIFR.L  13.8       1.5   -0.05               VLLFR   8.3       5.5   -0.05    1   P01023 K.VIFIR.G   8.3       5.5   -0.05               VLFLR   8.3       5.5   -0.02               R.VLMLR.N   4.6        13    0.02               VIMER   4.6        13    0.02               K.VLEMR.G   4.6        13    0.02               R.VLMER.N   4.6        13   -0.01               R.VLYPR.V   4.6        13   -0.05               R.IVIFR.K ``` | |

|  |  |
| --- | --- |
| |  | | --- | | Top scoring peptide matches to query 387 97: Sum of 2 scans in range 479 (rt=27.7154, f=5, i=37) to 485 (rt=28.0141, f=5, i=38) [\\172.16.3.18\masslynx\2009.PRO\Data\20090916\_36\_qdda.raw] Score greater than 26 indicates homology Score greater than 28 indicates identity  ``` Score    Expect   Delta  Hit  Protein Peptide  17.7      0.63   -0.05    1   P01023 K.VIFIR.G  17.7      0.63   -0.05               VLFLR  17.7      0.63   -0.01               R.VLMLR.N  12.3       2.2   -0.05               K.VFIIR.K  12.3       2.2   -0.05               K.VFLLR.R  12.3       2.2   -0.01               R.VMIIR.T  12.3       2.2   -0.01               R.VMLLR.G  11.9       2.4    0.02               VIMER  11.9       2.4    0.02               R.VLMER.N  11.2       2.8   -0.01               K.IVMIR.D ``` | |

|  |  |
| --- | --- |
| |  | | --- | | Top scoring peptide matches to query 388 88: Scan 440 (rt=25.2143, f=6, i=32) [\\172.16.3.18\masslynx\2009.PRO\Data\20090915\_25\_qdda.raw] Score greater than 28 indicates identity  ``` Score    Expect   Delta  Hit  Protein Peptide  20.2      0.35   -0.04    1   P01023 K.VIFIR.G  20.2      0.35   -0.04               VLFLR  20.2      0.35   -0.01               R.VLMLR.N  13.8       1.5   -0.04               R.VIIFR.L  13.8       1.5    0.02               VIMER  13.8       1.5    0.02               K.VLEMR.G  13.8       1.5   -0.04               VLLFR  13.8       1.5    0.02               R.VLMER.N  13.8       1.5   -0.01               R.VLYPR.V  13.1       1.8   -0.01               K.IVMIR.D ``` | |

|  |  |
| --- | --- |
| |  | | --- | | Top scoring peptide matches to query 389 50: Sum of 4 scans in range 301 (rt=19.1754, f=6, i=20) to 324 (rt=20.2868, f=7, i=37) [\\172.16.3.18\masslynx\2009.PRO\Data\20090915\_41\_qdda.raw] Score greater than 23 indicates homology Score greater than 28 indicates identity  ``` Score    Expect   Delta  Hit  Protein Peptide  15.8      0.97   -0.04    1   P01023 K.VIFIR.G  15.8      0.97   -0.04               VLFLR  15.8      0.97   -0.00               R.VLMLR.N  10.1       3.6   -0.00               K.IVMIR.D  10.1       3.6   -0.04               K.LVFIR.N   9.5       4.1   -0.04               R.VIIFR.L   9.5       4.1    0.03               VIMER   9.5       4.1    0.03               K.VLEMR.G   9.5       4.1   -0.04               VLLFR   9.5       4.1    0.03               R.VLMER.N ``` | |

|  |  |
| --- | --- |
| |  | | --- | | Top scoring peptide matches to query 390 95: Sum of 2 scans in range 490 (rt=28.2135, f=2, i=96) to 496 (rt=28.5122, f=2, i=97) [\\172.16.3.18\masslynx\2009.PRO\Data\20090916\_44\_qdda.raw] Score greater than 21 indicates homology Score greater than 28 indicates identity  ``` Score    Expect   Delta  Hit  Protein Peptide  10.6       3.2   -0.03    1   P01023 K.VIFIR.G  10.6       3.2   -0.03               VLFLR  10.6       3.2    0.00               R.VLMLR.N   7.8       6.1   -0.03               R.VIIFR.L   7.8       6.1   -0.03               VLLFR   6.4       8.5    0.04               VIMER   6.4       8.5    0.04               K.VLEMR.G   6.4       8.5    0.04               R.VLMER.N   6.4       8.5    0.01               R.VLYPR.V   5.0        12   -0.03               K.VFIIR.K ``` | |

|  |  |
| --- | --- |
| |  | | --- | | Top scoring peptide matches to query 391 67: Sum of 2 scans in range 448 (rt=26.1231, f=2, i=118) to 454 (rt=26.4217, f=2, i=119) [\\172.16.3.18\masslynx\2009.PRO\Data\20090930\_41\_qdda.raw] Score greater than 22 indicates homology Score greater than 28 indicates identity  ``` Score    Expect   Delta  Hit  Protein Peptide  15.3       1.1   -0.03    1   P01023 K.VIFIR.G  15.3       1.1   -0.03               VLFLR  15.3       1.1    0.01               R.VLMLR.N   8.6       5.1    0.01               K.IVMIR.D   8.6       5.1   -0.03               K.LVFIR.N   7.0       7.4   -0.03               R.VIIFR.L   7.0       7.4   -0.03               VLLFR   7.0       7.4   -0.03               K.VFIIR.K   7.0       7.4   -0.03               K.VFLLR.R   7.0       7.4    0.01               R.VMIIR.T ``` | |

|  |  |
| --- | --- |
| |  | | --- | | Top scoring peptide matches to query 392 103: Sum of 2 scans in range 499 (rt=28.6965, f=2, i=101) to 505 (rt=28.9952, f=2, i=102) [\\172.16.3.18\masslynx\2009.PRO\Data\20090917\_12\_qdda.raw] Score greater than 26 indicates homology Score greater than 28 indicates identity  ``` Score    Expect   Delta  Hit  Protein Peptide  17.3      0.68   -0.03    1   P01023 K.VIFIR.G  17.3      0.68   -0.03               VLFLR  17.3      0.68    0.01               R.VLMLR.N  12.2       2.3   -0.03               K.VFIIR.K  12.2       2.3   -0.03               K.VFLLR.R  12.2       2.3    0.01               R.VMIIR.T  12.2       2.3    0.01               R.VMLLR.G  10.4       3.3    0.01               K.IVMIR.D  10.4       3.3   -0.03               K.LVFIR.N  10.1       3.6    0.04               R.VEMIR.Q ``` | |

|  |  |
| --- | --- |
| |  | | --- | | Top scoring peptide matches to query 393 57: Sum of 2 scans in range 378 (rt=23.1017, f=5, i=35) to 384 (rt=23.4004, f=5, i=36) [\\172.16.3.18\masslynx\2009.PRO\Data\20090917\_36\_qdda.raw] Score greater than 23 indicates homology Score greater than 28 indicates identity  ``` Score    Expect   Delta  Hit  Protein Peptide  15.8      0.97   -0.02    1   P01023 K.VIFIR.G  15.8      0.97   -0.02               VLFLR  15.8      0.97    0.02               R.VLMLR.N  10.0       3.7    0.05               VIMER  10.0       3.7    0.05               R.VLMER.N  10.0       3.7   -0.02               K.VFIIR.K  10.0       3.7   -0.02               K.VFLLR.R  10.0       3.7    0.02               R.VMIIR.T  10.0       3.7    0.02               R.VMLLR.G   8.4       5.3    0.02               K.IVMIR.D ``` | |

|  |  |
| --- | --- |
| |  | | --- | | Top scoring peptide matches to query 394 44: Sum of 6 scans in range 437 (rt=25.2053, f=2, i=121) to 451 (rt=25.8892, f=3, i=40) [\\172.16.3.18\masslynx\2009.PRO\Data\20090930\_46\_qdda.raw] Score greater than 25 indicates homology Score greater than 28 indicates identity  ``` Score    Expect   Delta  Hit  Protein Peptide  20.5      0.33   -0.02    1   P01023 K.VIFIR.G  20.5      0.33   -0.02               VLFLR  20.5      0.33    0.02               R.VLMLR.N  11.0       2.9   -0.02               R.VIIFR.L  11.0       2.9   -0.02               VLLFR  11.0         3   -0.02               K.VFIIR.K  11.0         3   -0.02               K.VFLLR.R  11.0         3    0.02               R.VMIIR.T  11.0         3    0.02               R.VMLLR.G   9.6       4.1    0.05               VIMER ``` | |

|  |  |
| --- | --- |
| |  | | --- | | Top scoring peptide matches to query 395 103: Sum of 4 scans in range 469 (rt=27.2554, f=7, i=40) to 482 (rt=27.8894, f=5, i=46) [\\172.16.3.18\masslynx\2009.PRO\Data\20090915\_\_05\_qdda.raw] Score greater than 21 indicates homology Score greater than 28 indicates identity  ``` Score    Expect   Delta  Hit  Protein Peptide  11.0       2.9   -0.01    1   P01023 K.VIFIR.G  11.0       2.9   -0.01               VLFLR  11.0       2.9    0.02               R.VLMLR.N   8.0       5.8   -0.01               R.VIIFR.L   8.0       5.8   -0.01               VLLFR   6.7       7.9    0.06               VIMER   6.7       7.9    0.06               K.VLEMR.G   6.7       7.9    0.06               R.VLMER.N   6.7       7.9    0.02               R.VLYPR.V   4.6        13   -0.01               K.VFIIR.K ``` | |

|  |  |
| --- | --- |
| |  | | --- | | Top scoring peptide matches to query 396 77: Scan 448 (rt=26.4376, f=4, i=53) [\\172.16.3.18\masslynx\2009.PRO\Data\20090930\_31\_qdda.raw] Score greater than 19 indicates homology Score greater than 28 indicates identity  ``` Score    Expect   Delta  Hit  Protein Peptide   9.4       4.3    0.06               VIMER   9.4       4.3    0.06               R.VLMER.N   5.7        10    0.06               K.VFPER.S   4.6        13   -0.01    1   P01023 K.VIFIR.G   4.6        13   -0.01               VLFLR   4.6        13    0.02               R.VLMLR.N   4.4        13    0.06               K.VLEMR.G   3.1        18   -0.01               R.VIIFR.L   3.1        18   -0.01               VLLFR   3.1        18    0.02               R.VLYPR.V ``` | |

|  |  |
| --- | --- |
| |  | | --- | | Top scoring peptide matches to query 397 69: Sum of 2 scans in range 453 (rt=26.5321, f=4, i=40) to 459 (rt=26.8308, f=4, i=41) [\\172.16.3.18\masslynx\2009.PRO\Data\20090930\_36\_qdda.raw] Score greater than 24 indicates homology Score greater than 28 indicates identity  ``` Score    Expect   Delta  Hit  Protein Peptide  15.2       1.1   -0.01    1   P01023 K.VIFIR.G  15.2       1.1   -0.01               VLFLR  15.2       1.1    0.02               R.VLMLR.N  10.4       3.4    0.06               VIMER  10.4       3.4    0.06               R.VLMER.N   9.8       3.9   -0.01               R.VIIFR.L   9.8       3.9   -0.01               VLLFR   9.5       4.1    0.06               K.VLEMR.G   8.4       5.3    0.02               R.VLYPR.V   8.0       5.8    0.02               K.IVMIR.D ``` | |

|  |  |
| --- | --- |
| |  | | --- | | Top scoring peptide matches to query 398 47: Sum of 4 scans in range 319 (rt=20.0597, f=3, i=30) to 338 (rt=20.9925, f=2, i=64) [\\172.16.3.18\masslynx\2009.PRO\Data\20090917\_40\_qdda.raw] Score greater than 28 indicates identity  ``` Score    Expect   Delta  Hit  Protein Peptide  17.8      0.62   -0.01    1   P01023 K.VIFIR.G  17.8      0.62   -0.01               VLFLR  17.8      0.62    0.02               R.VLMLR.N  14.2       1.4    0.02               K.IVMIR.D  14.2       1.4   -0.01               K.LVFIR.N  11.4       2.7   -0.01               K.VFIIR.K  11.4       2.7   -0.01               K.VFLLR.R  11.4       2.7    0.02               R.VMIIR.T  11.4       2.7    0.02               R.VMLLR.G  10.6       3.2    0.06               VIMER ``` | |

|  |  |
| --- | --- |
| |  | | --- | | Top scoring peptide matches to query 399 108: Sum of 4 scans in range 516 (rt=29.2469, f=3, i=69) to 539 (rt=30.3715, f=5, i=42) [\\172.16.3.18\masslynx\2009.PRO\Data\20090917\_04\_qdda.raw] Score greater than 19 indicates homology Score greater than 28 indicates identity  ``` Score    Expect   Delta  Hit  Protein Peptide   8.4       5.4   -0.01    1   P01023 K.VIFIR.G   8.4       5.4   -0.01               VLFLR   8.4       5.4    0.02               R.VLMLR.N   8.3       5.4    0.06               VIMER   8.3       5.4    0.06               R.VLMER.N   6.5       8.3   -0.01               R.VIIFR.L   6.5       8.3   -0.01               VLLFR   4.6        13    0.06               K.VLEMR.G   4.6        13    0.03               R.VLYPR.V   3.8        15   -0.01               K.VFIIR.K ``` | |

|  |  |
| --- | --- |
| |  | | --- | | Top scoring peptide matches to query 400 30: Sum of 3 scans in range 430 (rt=24.6802, f=2, i=113) to 440 (rt=25.1649, f=2, i=115) [\\172.16.3.18\masslynx\2009.PRO\Data\20090930\_51\_qdda.raw] Score greater than 23 indicates homology Score greater than 28 indicates identity  ``` Score    Expect   Delta  Hit  Protein Peptide  17.7      0.63   -0.01    1   P01023 K.VIFIR.G  17.7      0.63   -0.01               VLFLR  17.7      0.63    0.03               R.VLMLR.N   9.2       4.4   -0.01               K.VFIIR.K   9.2       4.4   -0.01               K.VFLLR.R   9.2       4.4    0.03               R.VMIIR.T   9.2       4.4    0.03               R.VMLLR.G   9.0       4.7   -0.01               R.VIIFR.L   9.0       4.7   -0.01               VLLFR   7.7       6.3    0.06               VIMER ``` | |

|  |  |
| --- | --- |
| |  | | --- | | Top scoring peptide matches to query 401 108: Sum of 4 scans in range 493 (rt=28.2922, f=4, i=47) to 511 (rt=29.1751, f=2, i=104) [\\172.16.3.18\masslynx\2009.PRO\Data\20090917\_08\_qdda.raw] Score greater than 24 indicates homology Score greater than 28 indicates identity  ``` Score    Expect   Delta  Hit  Protein Peptide  14.9       1.2    0.00    1   P01023 K.VIFIR.G  14.9       1.2    0.00               VLFLR  14.9       1.2    0.04               R.VLMLR.N  10.6       3.2    0.00               K.VFIIR.K  10.6       3.2    0.00               K.VFLLR.R  10.6       3.2    0.04               R.VMIIR.T  10.6       3.2    0.04               R.VMLLR.G   8.2       5.6    0.04               K.IVMIR.D   8.2       5.6    0.00               K.LVFIR.N   7.7       6.2    0.07               R.VEMIR.Q ``` | |

|  |  |
| --- | --- |
| |  | | --- | | Top scoring peptide matches to query 402 32: Scan 446 (rt=24.8977, f=2, i=74) [\\172.16.3.18\masslynx\2009.PRO\Data\20090930\_56\_qdda.raw] Score greater than 17 indicates homology Score greater than 28 indicates identity  ``` Score    Expect   Delta  Hit  Protein Peptide   7.0       7.3    0.02    1   P01023 K.VIFIR.G   7.0       7.3    0.02               VLFLR   4.6        13    0.02               K.LVFIR.N   2.4        21    0.02               R.VIIFR.L   2.4        21    0.02               VLLFR   2.4        21    0.05               R.VLMLR.N   1.9        23    0.02               K.VFIIR.K   1.9        23    0.02               K.VFLLR.R ``` | |

|  |  |
| --- | --- |
| |  | | --- | | Top scoring peptide matches to query 410 18: Sum of 2 scans in range 131 (rt=11.0112, f=5, i=5) to 137 (rt=11.3103, f=5, i=6) [\\172.16.3.18\masslynx\2009.PRO\Data\20090915\_33\_qdda.raw] Score greater than 19 indicates homology Score greater than 25 indicates identity  ``` Score    Expect   Delta  Hit  Protein Peptide   9.3         2   -0.15    2   P01024 K.LLPVGR.T   6.5       3.8   -0.16               R.IIPRR.F   6.5       3.8   -0.15               K.ILGVPR.S   6.5       3.8   -0.15               K.ILPGVR.I   6.5       3.8   -0.16               LLPRR   6.5       3.8   -0.16               LLRPR   4.6       5.9   -0.05               R.IHDNR.I   4.6       5.9   -0.09               K.IHTQR.Q   4.6       5.9   -0.05               R.LHNDR.V   4.4       6.1   -0.05               K.HVNER.F ``` | |

|  |  |
| --- | --- |
| |  | | --- | | Top scoring peptide matches to query 411 27: Sum of 2 scans in range 146 (rt=11.784, f=4, i=7) to 152 (rt=12.0827, f=4, i=8) [\\172.16.3.18\masslynx\2009.PRO\Data\20090916\_20\_qdda.raw] Score greater than 25 indicates identity  ``` Score    Expect   Delta  Hit  Protein Peptide  14.9      0.55   -0.10    2   P01024 K.LLPVGR.T  12.8      0.89   -0.11               R.IIPRR.F  12.8      0.89   -0.10               K.ILGVPR.S  12.8      0.89   -0.10               K.ILPGVR.I  12.8      0.89   -0.11               LLPRR  12.8      0.89   -0.11               LLRPR   0.4        16    0.00               K.HVNER.F   0.1        17   -0.11               K.IRIPR.H   0.1        17   -0.11               IRLPR   0.1        17   -0.11               R.IRPLR.T ``` | |

|  |  |
| --- | --- |
| |  | | --- | | Top scoring peptide matches to query 412 26: Sum of 4 scans in range 163 (rt=12.5383, f=4, i=10) to 180 (rt=13.3846, f=4, i=13) [\\172.16.3.18\masslynx\2009.PRO\Data\20090917\_32\_qdda.raw] Score greater than 25 indicates identity  ``` Score    Expect   Delta  Hit  Protein Peptide  15.4      0.49   -0.09    2   P01024 K.LLPVGR.T  14.1      0.67   -0.10               R.IIPRR.F  14.1      0.67   -0.09               K.ILGVPR.S  14.1      0.67   -0.09               K.ILPGVR.I  14.1      0.67   -0.10               LLPRR  14.1      0.67   -0.10               LLRPR   0.5        15   -0.10               K.IRIPR.H   0.5        15   -0.10               IRLPR   0.5        15   -0.10               R.IRPLR.T   0.5        15   -0.10               LRLPR ``` | |

|  |  |
| --- | --- |
| |  | | --- | | Top scoring peptide matches to query 413 24: Sum of 2 scans in range 134 (rt=11.1792, f=3, i=11) to 140 (rt=11.4779, f=3, i=12) [\\172.16.3.18\masslynx\2009.PRO\Data\20090916\_28\_qdda.raw] Score greater than 25 indicates identity  ``` Score    Expect   Delta  Hit  Protein Peptide  17.5       0.3   -0.09    2   P01024 K.LLPVGR.T  12.3         1   -0.10               R.IIPRR.F  12.3         1   -0.09               K.ILGVPR.S  12.3         1   -0.09               K.ILPGVR.I  12.3         1   -0.10               LLPRR  12.3         1   -0.10               LLRPR   5.7       4.6    0.01               K.HVNER.F   0.3        16   -0.10               K.IRIPR.H   0.3        16   -0.10               IRLPR   0.3        16   -0.10               R.IRPLR.T ``` | |

|  |  |
| --- | --- |
| |  | | --- | | Top scoring peptide matches to query 414 21: Sum of 2 scans in range 132 (rt=11.0624, f=6, i=5) to 138 (rt=11.3611, f=6, i=6) [\\172.16.3.18\masslynx\2009.PRO\Data\20090916\_16\_qdda.raw] Score greater than 20 indicates homology Score greater than 25 indicates identity  ``` Score    Expect   Delta  Hit  Protein Peptide   8.2       2.6   -0.07    2   P01024 K.LLPVGR.T   7.0       3.3   -0.08               R.IIPRR.F   7.0       3.3   -0.07               K.ILGVPR.S   7.0       3.3   -0.07               K.ILPGVR.I   7.0       3.3   -0.08               LLPRR   7.0       3.3   -0.08               LLRPR   5.1       5.2   -0.01               K.IHTQR.Q ``` | |

|  |  |
| --- | --- |
| |  | | --- | | Top scoring peptide matches to query 415 38: Sum of 6 scans in range 234 (rt=16.0272, f=3, i=20) to 268 (rt=17.6936, f=3, i=25) [\\172.16.3.18\masslynx\2009.PRO\Data\20090915\_21\_qdda.raw] Score greater than 25 indicates identity  ``` Score    Expect   Delta  Hit  Protein Peptide  23.0     0.085   -0.06    2   P01024 K.LLPVGR.T  12.4      0.97   -0.07               R.IIPRR.F  12.4      0.97   -0.06               K.ILPGVR.I  12.4      0.97   -0.07               LLPRR  10.2       1.6    0.04               K.HVNER.F   9.6       1.9   -0.06               K.ILGVPR.S   9.6       1.9   -0.07               LLRPR   5.2       5.2   -0.06               K.IVPLGR.K   5.2       5.2   -0.06               R.LPVLGR.D   5.0       5.4    0.01               LPPDGR ``` | |

|  |  |
| --- | --- |
| |  | | --- | | Top scoring peptide matches to query 416 26: Sum of 10 scans in range 165 (rt=12.6395, f=2, i=27) to 195 (rt=14.1066, f=2, i=33) [\\172.16.3.18\masslynx\2009.PRO\Data\20090917\_24\_qdda.raw] Score greater than 25 indicates identity  ``` Score    Expect   Delta  Hit  Protein Peptide  14.3      0.63   -0.06    2   P01024 K.LLPVGR.T  12.4      0.98   -0.07               R.IIPRR.F  12.4      0.98   -0.06               K.ILGVPR.S  12.4      0.98   -0.06               K.ILPGVR.I  12.4      0.98   -0.07               LLPRR  12.4      0.98   -0.07               LLRPR ``` | |

|  |  |
| --- | --- |
| |  | | --- | | Top scoring peptide matches to query 417 26: Sum of 3 scans in range 173 (rt=12.8743, f=3, i=12) to 188 (rt=13.6014, f=3, i=14) [\\172.16.3.18\masslynx\2009.PRO\Data\20090915\_25\_qdda.raw] Score greater than 25 indicates identity  ``` Score    Expect   Delta  Hit  Protein Peptide  17.1      0.33   -0.06    2   P01024 K.LLPVGR.T  12.4      0.97   -0.07               R.IIPRR.F  12.4      0.97   -0.06               K.ILPGVR.I  12.4      0.97   -0.07               LLPRR  11.8       1.1   -0.06               K.ILGVPR.S  11.8       1.1   -0.07               LLRPR   5.1       5.2    0.02               LPPDGR   4.5         6   -0.06               K.IVPLGR.K   4.5         6   -0.06               R.LPVLGR.D   3.5       7.6   -0.07               R.IPIRR.I ``` | |

|  |  |
| --- | --- |
| |  | | --- | | Top scoring peptide matches to query 418 28: Sum of 4 scans in range 156 (rt=12.2512, f=3, i=17) to 173 (rt=13.0974, f=3, i=20) [\\172.16.3.18\masslynx\2009.PRO\Data\20090917\_28\_qdda.raw] Score greater than 24 indicates homology Score greater than 25 indicates identity  ``` Score    Expect   Delta  Hit  Protein Peptide  15.9      0.44   -0.05    2   P01024 K.LLPVGR.T  11.0       1.4   -0.07               R.IIPRR.F  11.0       1.4   -0.05               K.ILGVPR.S  11.0       1.4   -0.05               K.ILPGVR.I  11.0       1.4   -0.07               LLPRR  11.0       1.4   -0.07               LLRPR   5.7       4.5    0.04               K.HVNER.F ``` | |

|  |  |
| --- | --- |
| |  | | --- | | Top scoring peptide matches to query 419 47: Sum of 5 scans in range 299 (rt=19.0749, f=2, i=58) to 332 (rt=20.6771, f=6, i=35) [\\172.16.3.18\masslynx\2009.PRO\Data\20090915\_17\_qdda.raw] Score greater than 25 indicates identity  ``` Score    Expect   Delta  Hit  Protein Peptide  18.7      0.23   -0.05    2   P01024 K.LLPVGR.T  11.9       1.1   -0.06               R.IIPRR.F  11.9       1.1   -0.05               K.ILGVPR.S  11.9       1.1   -0.05               K.ILPGVR.I  11.9       1.1   -0.06               LLPRR  11.9       1.1   -0.06               LLRPR   6.8       3.6   -0.05               K.IVPLGR.K   6.8       3.6    0.02               LPPDGR   6.8       3.6   -0.05               R.LPVLGR.D   5.6       4.6    0.01               K.IHTQR.Q ``` | |

|  |  |
| --- | --- |
| |  | | --- | | Top scoring peptide matches to query 420 34: Sum of 2 scans in range 199 (rt=14.1222, f=3, i=15) to 208 (rt=14.5503, f=3, i=16) [\\172.16.3.18\masslynx\2009.PRO\Data\20090915\_25\_qdda.raw] Score greater than 20 indicates homology Score greater than 25 indicates identity  ``` Score    Expect   Delta  Hit  Protein Peptide  14.4      0.61   -0.04    2   P01024 K.LLPVGR.T   6.6       3.7    0.05               K.HVNER.F   5.4       4.9   -0.06               R.IIPRR.F   5.4       4.9   -0.04               K.ILGVPR.S   5.4       4.9   -0.04               K.ILPGVR.I   5.4       4.9   -0.06               LLPRR   5.4       4.9   -0.06               LLRPR   4.4       6.2    0.02               R.LATGHR.V   4.4       6.2   -0.01               R.LATPPR.R   3.8       7.1   -0.04               K.IVPLGR.K ``` | |

|  |  |
| --- | --- |
| |  | | --- | | Top scoring peptide matches to query 421 58: Sum of 2 scans in range 358 (rt=21.8055, f=2, i=105) to 364 (rt=22.1042, f=2, i=106) [\\172.16.3.18\masslynx\2009.PRO\Data\20090916\_36\_qdda.raw] Score greater than 22 indicates homology Score greater than 25 indicates identity  ``` Score    Expect   Delta  Hit  Protein Peptide  12.9      0.87   -0.04    2   P01024 K.LLPVGR.T   8.4       2.4   -0.06               R.IIPRR.F   8.4       2.4   -0.04               K.ILGVPR.S   8.4       2.4   -0.04               K.ILPGVR.I   8.4       2.4   -0.06               LLPRR   8.4       2.4   -0.06               LLRPR   6.0       4.3    0.05               K.HVNER.F   2.5       9.4   -0.04               K.IVPLGR.K   2.5       9.4    0.03               LPPDGR   2.5       9.4   -0.04               R.LPVLGR.D ``` | |

|  |  |
| --- | --- |
| |  | | --- | | Top scoring peptide matches to query 422 21: Sum of 15 scans in range 167 (rt=12.755, f=2, i=32) to 226 (rt=15.6247, f=2, i=40) [\\172.16.3.18\masslynx\2009.PRO\Data\20090917\_20\_qdda.raw] Score greater than 24 indicates homology Score greater than 25 indicates identity  ``` Score    Expect   Delta  Hit  Protein Peptide  18.1      0.26   -0.04    2   P01024 K.LLPVGR.T  10.6       1.5   -0.05               R.IIPRR.F  10.6       1.5   -0.04               K.ILGVPR.S  10.6       1.5   -0.04               K.ILPGVR.I  10.6       1.5   -0.05               LLPRR  10.6       1.5   -0.05               LLRPR   5.6       4.7    0.06               K.HVNER.F ``` | |

|  |  |
| --- | --- |
| |  | | --- | | Top scoring peptide matches to query 423 59: Sum of 2 scans in range 331 (rt=20.5664, f=2, i=64) to 337 (rt=20.865, f=2, i=65) [\\172.16.3.18\masslynx\2009.PRO\Data\20090916\_40\_qdda.raw] Score greater than 16 indicates homology Score greater than 25 indicates identity  ``` Score    Expect   Delta  Hit  Protein Peptide   6.8       3.5   -0.04    2   P01024 K.LLPVGR.T   6.7       3.6   -0.05               R.IIPRR.F   6.7       3.6   -0.04               K.ILPGVR.I   6.7       3.6   -0.05               LLPRR   3.0       8.5   -0.04               K.ILGVPR.S   3.0       8.5   -0.05               LLRPR ``` | |

|  |  |
| --- | --- |
| |  | | --- | | Top scoring peptide matches to query 424 43: Sum of 10 scans in range 190 (rt=13.9124, f=3, i=14) to 267 (rt=17.6535, f=6, i=18) [\\172.16.3.18\masslynx\2009.PRO\Data\20090916\_32\_qdda.raw] Score greater than 17 indicates homology Score greater than 25 indicates identity  ``` Score    Expect   Delta  Hit  Protein Peptide  10.7       1.5   -0.05               R.IIPRR.F  10.7       1.5   -0.04               K.ILGVPR.S  10.7       1.5   -0.04               K.ILPGVR.I  10.7       1.5   -0.05               LLPRR  10.7       1.5   -0.04    2   P01024 K.LLPVGR.T  10.7       1.5   -0.05               LLRPR   3.4       7.7    0.04               LPPDGR   0.0        17    0.06               K.HVNER.F ``` | |

|  |  |
| --- | --- |
| |  | | --- | | Top scoring peptide matches to query 425 37: Sum of 21 scans in range 223 (rt=15.3666, f=6, i=13) to 286 (rt=18.437, f=3, i=40) [\\172.16.3.18\masslynx\2009.PRO\Data\20090930\_26\_qdda.raw] Score greater than 24 indicates homology Score greater than 25 indicates identity  ``` Score    Expect   Delta  Hit  Protein Peptide  13.1      0.82   -0.03    2   P01024 K.LLPVGR.T  11.9       1.1   -0.04               R.IIPRR.F  11.9       1.1   -0.03               K.ILGVPR.S  11.9       1.1   -0.03               K.ILPGVR.I  11.9       1.1   -0.04               LLPRR  11.9       1.1   -0.04               LLRPR ``` | |

|  |  |
| --- | --- |
| |  | | --- | | Top scoring peptide matches to query 426 18: Sum of 17 scans in range 153 (rt=12.0062, f=4, i=4) to 239 (rt=16.1391, f=2, i=39) [\\172.16.3.18\masslynx\2009.PRO\Data\20090917\_16\_qdda.raw] Score greater than 22 indicates homology Score greater than 25 indicates identity  ``` Score    Expect   Delta  Hit  Protein Peptide  14.1      0.67   -0.02    2   P01024 K.LLPVGR.T   9.5       1.9   -0.03               R.IIPRR.F   9.5       1.9   -0.02               K.ILGVPR.S   9.5       1.9   -0.02               K.ILPGVR.I   9.5       1.9   -0.03               LLPRR   9.5       1.9   -0.03               LLRPR   5.6       4.7    0.08               K.HVNER.F ``` | |

|  |  |
| --- | --- |
| |  | | --- | | Top scoring peptide matches to query 428 62: Sum of 4 scans in range 357 (rt=21.7752, f=2, i=76) to 374 (rt=22.6082, f=2, i=79) [\\172.16.3.18\masslynx\2009.PRO\Data\20090917\_12\_qdda.raw] Score greater than 22 indicates homology Score greater than 25 indicates identity  ``` Score    Expect   Delta  Hit  Protein Peptide  15.1      0.52   -0.02    2   P01024 K.LLPVGR.T   8.8       2.2   -0.03               R.IIPRR.F   8.8       2.2   -0.02               K.ILPGVR.I   8.8       2.2   -0.03               LLPRR   8.3       2.5   -0.02               K.ILGVPR.S   8.3       2.5   -0.03               LLRPR ``` | |

|  |  |
| --- | --- |
| |  | | --- | | Top scoring peptide matches to query 429 20: Sum of 18 scans in range 198 (rt=14.0497, f=2, i=38) to 248 (rt=16.4863, f=4, i=12) [\\172.16.3.18\masslynx\2009.PRO\Data\20090930\_21\_qdda.raw] Score greater than 24 indicates homology Score greater than 25 indicates identity  ``` Score    Expect   Delta  Hit  Protein Peptide  11.8       1.1   -0.03               R.IIPRR.F  11.8       1.1   -0.02               K.ILGVPR.S  11.8       1.1   -0.02               K.ILPGVR.I  11.8       1.1   -0.03               LLPRR  11.8       1.1   -0.02    2   P01024 K.LLPVGR.T  11.8       1.1   -0.03               LLRPR ``` | |

|  |  |
| --- | --- |
| |  | | --- | | Top scoring peptide matches to query 430 31: Sum of 25 scans in range 198 (rt=14.2826, f=2, i=53) to 258 (rt=17.1633, f=4, i=25) [\\172.16.3.18\masslynx\2009.PRO\Data\20090930\_31\_qdda.raw] Score greater than 24 indicates homology Score greater than 25 indicates identity  ``` Score    Expect   Delta  Hit  Protein Peptide  13.4      0.77   -0.02    2   P01024 K.LLPVGR.T  11.8       1.1   -0.03               R.IIPRR.F  11.8       1.1   -0.02               K.ILGVPR.S  11.8       1.1   -0.02               K.ILPGVR.I  11.8       1.1   -0.03               LLPRR  11.8       1.1   -0.03               LLRPR ``` | |

|  |  |
| --- | --- |
| |  | | --- | | Top scoring peptide matches to query 431 72: Sum of 2 scans in range 357 (rt=21.655, f=2, i=75) to 363 (rt=21.9537, f=2, i=76) [\\172.16.3.18\masslynx\2009.PRO\Data\20090917\_08\_qdda.raw] Score greater than 16 indicates homology Score greater than 25 indicates identity  ``` Score    Expect   Delta  Hit  Protein Peptide   6.8       3.6   -0.01               K.ILPGVR.I   3.0       8.5   -0.03               R.IIPRR.F   3.0       8.5   -0.03               LLPRR   3.0       8.5   -0.01    2   P01024 K.LLPVGR.T ``` | |

|  |  |
| --- | --- |
| |  | | --- | | Top scoring peptide matches to query 432 33: Sum of 40 scans in range 226 (rt=15.6035, f=3, i=25) to 291 (rt=18.6328, f=2, i=86) [\\172.16.3.18\masslynx\2009.PRO\Data\20090930\_36\_qdda.raw] Score greater than 24 indicates homology Score greater than 25 indicates identity  ``` Score    Expect   Delta  Hit  Protein Peptide  11.9       1.1   -0.02               R.IIPRR.F  11.9       1.1   -0.01               K.ILGVPR.S  11.9       1.1   -0.01               K.ILPGVR.I  11.9       1.1   -0.02               LLPRR  11.9       1.1   -0.01    2   P01024 K.LLPVGR.T  11.9       1.1   -0.02               LLRPR ``` | |

|  |  |
| --- | --- |
| |  | | --- | | Top scoring peptide matches to query 433 28: Sum of 16 scans in range 185 (rt=13.5922, f=2, i=54) to 217 (rt=15.0921, f=2, i=68) [\\172.16.3.18\masslynx\2009.PRO\Data\20090930\_41\_qdda.raw] Score greater than 23 indicates homology Score greater than 25 indicates identity  ``` Score    Expect   Delta  Hit  Protein Peptide  14.9      0.55   -0.02               R.IIPRR.F  14.9      0.55   -0.01               K.ILPGVR.I  14.9      0.55   -0.02               LLPRR  14.9      0.55   -0.01    2   P01024 K.LLPVGR.T  10.2       1.6   -0.01               K.ILGVPR.S  10.2       1.6   -0.02               LLRPR   4.0       6.7   -0.02               R.IPIRR.I   4.0       6.7   -0.02               R.IPLRR.Q   4.0       6.7   -0.02               R.LPIRR.S   4.0       6.7   -0.02               LPLRR ``` | |

|  |  |
| --- | --- |
| |  | | --- | | Top scoring peptide matches to query 462 4: Sum of 2 scans in range 104 (rt=9.65818, f=2, i=22) to 110 (rt=9.95687, f=2, i=23) [\\172.16.3.18\masslynx\2009.PRO\Data\20090917\_20\_qdda.raw] Score greater than 22 indicates homology Score greater than 29 indicates identity  ``` Score    Expect   Delta  Hit  Protein Peptide  12.3       2.7   -0.06    2   P01024 ENPMR   9.1       5.6   -0.13               K.NPIYR.S   2.2        27   -0.10               K.NPEFR.V ``` | |

|  |  |
| --- | --- |
| |  | | --- | | Top scoring peptide matches to query 465 6: Sum of 2 scans in range 115 (rt=10.2239, f=2, i=39) to 121 (rt=10.5225, f=2, i=40) [\\172.16.3.18\masslynx\2009.PRO\Data\20090930\_36\_qdda.raw] Score greater than 20 indicates homology Score greater than 29 indicates identity  ``` Score    Expect   Delta  Hit  Protein Peptide   9.9       4.6   -0.01    2   P01024 ENPMR   7.5       8.1   -0.08               K.NPIYR.S   2.0        29   -0.01               R.NPMER.M ``` | |

|  |  |
| --- | --- |
| |  | | --- | | Top scoring peptide matches to query 466 6: Sum of 2 scans in range 118 (rt=10.337, f=2, i=42) to 124 (rt=10.6357, f=2, i=43) [\\172.16.3.18\masslynx\2009.PRO\Data\20090930\_41\_qdda.raw] Score greater than 22 indicates homology Score greater than 29 indicates identity  ``` Score    Expect   Delta  Hit  Protein Peptide  11.2       3.4   -0.01    2   P01024 ENPMR   8.7       6.1   -0.07               K.NPIYR.S   1.7        31   -0.01               R.NPMER.M   1.6        31   -0.04               K.NPEFR.V ``` | |

|  |  |
| --- | --- |
| |  | | --- | | Top scoring peptide matches to query 467 11: Sum of 2 scans in range 116 (rt=10.2736, f=3, i=5) to 122 (rt=10.5723, f=3, i=6) [\\172.16.3.18\masslynx\2009.PRO\Data\20090930\_31\_qdda.raw] Score greater than 18 indicates homology Score greater than 29 indicates identity  ``` Score    Expect   Delta  Hit  Protein Peptide  11.7       3.1   -0.00    2   P01024 ENPMR  11.5       3.2   -0.07               K.NPIYR.S   4.3        17   -0.11               R.NFILR.G   4.3        17   -0.04               R.NFPER.E   4.3        17   -0.08               NMLIR   4.3        17   -0.08               K.NMLLR.I   1.2        34   -0.08               K.GAVLMR.G   1.2        34   -0.08               K.QVIMR.L   1.2        34   -0.08               VQLMR   0.1        44   -0.02               K.GWMPR.E ``` | |

|  |  |
| --- | --- |
| |  | | --- | | Top scoring peptide matches to query 469 13: Sum of 2 scans in range 119 (rt=10.2898, f=6, i=1) to 125 (rt=10.5885, f=6, i=2) [\\172.16.3.18\masslynx\2009.PRO\Data\20090930\_26\_qdda.raw] Score greater than 17 indicates homology Score greater than 29 indicates identity  ``` Score    Expect   Delta  Hit  Protein Peptide   7.7       7.6    0.00    2   P01024 ENPMR   4.5        16   -0.07               K.NPIYR.S ``` | |

|  |  |
| --- | --- |
| |  | | --- | | Top scoring peptide matches to query 470 7: Scan 121 (rt=10.4794, f=4, i=1) [\\172.16.3.18\masslynx\2009.PRO\Data\20090930\_46\_qdda.raw] Score greater than 19 indicates homology Score greater than 29 indicates identity  ``` Score    Expect   Delta  Hit  Protein Peptide   6.5        10   -0.07               K.NPIYR.S   6.1        11    0.00    2   P01024 ENPMR ``` | |

|  |  |
| --- | --- |
| |  | | --- | | Top scoring peptide matches to query 485 26: Sum of 2 scans in range 180 (rt=13.3984, f=3, i=13) to 194 (rt=14.0823, f=4, i=16) [\\172.16.3.18\masslynx\2009.PRO\Data\20090915\_21\_qdda.raw] Score greater than 19 indicates homology Score greater than 28 indicates identity  ``` Score    Expect   Delta  Hit  Protein Peptide  14.6       1.3   -0.04   37   P02749 K.LPECR.E   6.2         9   -0.07   20   P0C0L4 R.LPMMR.S   5.3        11   -0.06               R.IMDER.N   5.3        11   -0.06               R.LMDER.D   4.9        12   -0.07   20   P0C0L4 R.LPMMR.S   3.9        15   -0.06               K.IDMER.L   3.9        15   -0.09               LMVER ``` | |

|  |  |
| --- | --- |
| |  | | --- | | Top scoring peptide matches to query 486 17: Sum of 2 scans in range 147 (rt=11.7725, f=3, i=11) to 153 (rt=12.0712, f=3, i=12) [\\172.16.3.18\masslynx\2009.PRO\Data\20090917\_20\_qdda.raw] Score greater than 23 indicates homology Score greater than 33 indicates identity  ``` Score    Expect   Delta  Hit  Protein Peptide  14.2       3.8   -0.02   37   P02749 K.LPECR.E   9.8        10   -0.04               R.IMDER.N   9.8        10   -0.04               R.LMDER.D   7.8        17   -0.04               K.IDMER.L   7.8        17   -0.11               R.LFVER.L   7.8        17   -0.08               LMVER   6.0        25   -0.06   20   P0C0L4 R.LPMMR.S   4.9        33   -0.06   20   P0C0L4 R.LPMMR.S   4.6        35   -0.08               R.ASSSRR.A   2.3        59   -0.02               K.NMENR.H ``` | |

|  |  |
| --- | --- |
| |  | | --- | | Top scoring peptide matches to query 487 21: Sum of 2 scans in range 147 (rt=11.7565, f=3, i=18) to 153 (rt=12.0552, f=3, i=19) [\\172.16.3.18\masslynx\2009.PRO\Data\20090917\_24\_qdda.raw] Score greater than 20 indicates homology Score greater than 33 indicates identity  ``` Score    Expect   Delta  Hit  Protein Peptide  14.4       3.7   -0.02   37   P02749 K.LPECR.E   7.3        19   -0.06   20   P0C0L4 R.LPMMR.S   6.1        25   -0.02               K.NMENR.H   5.8        26   -0.06   20   P0C0L4 R.LPMMR.S   4.7        34   -0.03               SASQDR   4.4        37   -0.04               R.IMDER.N   4.4        37   -0.04               R.LMDER.D   4.0        40   -0.09               R.LNFNR.Q   2.9        52   -0.04               K.IDMER.L   2.5        57   -0.08               K.TGSSRR.Y ``` | |

|  |  |
| --- | --- |
| |  | | --- | | Top scoring peptide matches to query 488 16: Sum of 3 scans in range 171 (rt=12.732, f=4, i=5) to 186 (rt=13.4656, f=4, i=7) [\\172.16.3.18\masslynx\2009.PRO\Data\20090930\_21\_qdda.raw] Score greater than 26 indicates homology Score greater than 33 indicates identity  ``` Score    Expect   Delta  Hit  Protein Peptide  23.2      0.48   -0.02   37   P02749 K.LPECR.E  12.5       5.7   -0.04               R.IMDER.N  12.5       5.7   -0.04               R.LMDER.D  11.9       6.5   -0.05   20   P0C0L4 R.LPMMR.S  11.9       6.5   -0.05   20   P0C0L4 R.LPMMR.S  10.3       9.4   -0.04               K.IDMER.L  10.3       9.4   -0.11               R.LFVER.L  10.3       9.4   -0.07               LMVER   6.8        21   -0.08               R.ASSSRR.A   6.8        21   -0.08               R.GSTRSR.G ``` | |

|  |  |
| --- | --- |
| |  | | --- | | Top scoring peptide matches to query 489 29: Sum of 2 scans in range 184 (rt=13.5989, f=3, i=13) to 190 (rt=13.8976, f=3, i=14) [\\172.16.3.18\masslynx\2009.PRO\Data\20090930\_31\_qdda.raw] Score greater than 23 indicates homology Score greater than 33 indicates identity  ``` Score    Expect   Delta  Hit  Protein Peptide  19.3       1.2   -0.00   37   P02749 K.LPECR.E   9.4        12   -0.02               R.IMDER.N   9.4        12   -0.02               R.LMDER.D   9.3        12   -0.04   20   P0C0L4 R.LPMMR.S   9.3        12   -0.04   20   P0C0L4 R.LPMMR.S   7.7        17   -0.02               K.IDMER.L   7.7        17   -0.09               R.LFVER.L   7.7        17   -0.06               LMVER   0.5        90   -0.06               R.ASSSRR.A   0.5        90   -0.06               R.GSTRSR.G ``` | |

|  |  |
| --- | --- |
| |  | | --- | | Top scoring peptide matches to query 490 29: Sum of 5 scans in range 194 (rt=13.9565, f=2, i=37) to 232 (rt=15.8015, f=4, i=16) [\\172.16.3.18\masslynx\2009.PRO\Data\20090930\_26\_qdda.raw] Score greater than 24 indicates homology Score greater than 33 indicates identity  ``` Score    Expect   Delta  Hit  Protein Peptide  22.0      0.63   -0.00   37   P02749 K.LPECR.E  10.2       9.7   -0.02               R.IMDER.N  10.2       9.7   -0.02               R.LMDER.D   9.7        11   -0.04   20   P0C0L4 R.LPMMR.S   9.7        11   -0.04   20   P0C0L4 R.LPMMR.S   8.1        16   -0.02               K.IDMER.L   8.1        16   -0.09               R.LFVER.L   8.1        16   -0.06               LMVER   2.7        54   -0.06               R.ASSSRR.A ``` | |

|  |  |
| --- | --- |
| |  | | --- | | Top scoring peptide matches to query 492 27: Sum of 2 scans in range 179 (rt=13.3571, f=3, i=16) to 191 (rt=13.9412, f=3, i=17) [\\172.16.3.18\masslynx\2009.PRO\Data\20090930\_36\_qdda.raw] Score greater than 23 indicates homology Score greater than 33 indicates identity  ``` Score    Expect   Delta  Hit  Protein Peptide  10.5       8.9    0.01   37   P02749 K.LPECR.E ``` | |

|  |  |
| --- | --- |
| |  | | --- | | Top scoring peptide matches to query 493 36: Sum of 6 scans in range 248 (rt=16.5515, f=6, i=19) to 302 (rt=19.138, f=4, i=18) [\\172.16.3.18\masslynx\2009.PRO\Data\20090917\_12\_qdda.raw] Score greater than 16 indicates homology Score greater than 33 indicates identity  ``` Score    Expect   Delta  Hit  Protein Peptide  12.5       5.7    0.01   37   P02749 K.LPECR.E   3.3        48   -0.02   20   P0C0L4 R.LPMMR.S   3.3        48   -0.02   20   P0C0L4 R.LPMMR.S ``` | |

|  |  |
| --- | --- |
| |  | | --- | | Top scoring peptide matches to query 494 22: Scan 165 (rt=12.6301, f=3, i=7) [\\172.16.3.18\masslynx\2009.PRO\Data\20090930\_41\_qdda.raw] Score greater than 19 indicates homology Score greater than 33 indicates identity  ``` Score    Expect   Delta  Hit  Protein Peptide  16.1       2.5    0.02   37   P02749 K.LPECR.E   6.2        24   -0.02   20   P0C0L4 R.LPMMR.S   5.7        27   -0.04               K.IIDMR.G   5.7        27   -0.07               R.ILDFR.R   5.7        27   -0.04               K.LIDMR.D   5.7        27   -0.04               LLDMR   4.9        33   -0.02   20   P0C0L4 R.LPMMR.S   4.5        35   -0.07               IDLFR   4.5        35   -0.07               R.IEVFR.S   4.5        35   -0.07               K.LDIFR.I ``` | |

|  |  |
| --- | --- |
| |  | | --- | | Top scoring peptide matches to query 506 16: Sum of 4 scans in range 129 (rt=10.9114, f=3, i=12) to 146 (rt=11.7583, f=3, i=15) [\\172.16.3.18\masslynx\2009.PRO\Data\20090915\_33\_qdda.raw] Score greater than 19 indicates homology Score greater than 28 indicates identity  ``` Score    Expect   Delta  Hit  Protein Peptide  14.0       1.3   -0.14               R.VIDAVR.F  14.0       1.3   -0.14   14   P02766 K.VLDAVR.G   5.9       8.6   -0.07               R.DPDVAR.E   5.0        11   -0.12               K.VNNGIR.D   4.8        11   -0.18               K.VIVSVR.V   4.1        13   -0.15               R.VIRER.V   4.1        13   -0.14               R.VLGVER.A   4.1        13   -0.15               VLRER   3.5        15   -0.18               R.VLATLR.G   3.1        16   -0.16               K.IVWVR.F ``` | |

|  |  |
| --- | --- |
| |  | | --- | | Top scoring peptide matches to query 507 26: Sum of 6 scans in range 145 (rt=11.7342, f=3, i=13) to 175 (rt=13.2144, f=4, i=10) [\\172.16.3.18\masslynx\2009.PRO\Data\20090916\_20\_qdda.raw] Score greater than 28 indicates identity  ``` Score    Expect   Delta  Hit  Protein Peptide  26.5     0.075   -0.10               R.VIDAVR.F  26.5     0.075   -0.10   14   P02766 K.VLDAVR.G  14.2       1.3   -0.14               K.VIVSVR.V  14.2       1.3   -0.08               K.VNNGIR.D  14.1       1.3   -0.03               R.DPDVAR.E  13.5       1.5   -0.14               R.VLATLR.G   9.6       3.7   -0.11               K.VIERR.I   9.6       3.7   -0.11               R.VIRER.V   9.6       3.7   -0.11               K.VLERR.A   9.6       3.7   -0.10               R.VLGVER.A ``` | |

|  |  |
| --- | --- |
| |  | | --- | | Top scoring peptide matches to query 508 18: Sum of 2 scans in range 129 (rt=10.9131, f=3, i=16) to 135 (rt=11.2118, f=3, i=17) [\\172.16.3.18\masslynx\2009.PRO\Data\20090916\_16\_qdda.raw] Score greater than 28 indicates identity  ``` Score    Expect   Delta  Hit  Protein Peptide  26.2     0.079   -0.10               R.VIDAVR.F  26.2     0.079   -0.10   14   P02766 K.VLDAVR.G  14.0       1.3   -0.07               K.VNNGIR.D  13.9       1.3   -0.02               R.DPDVAR.E  13.4       1.5   -0.13               R.VLATLR.G  10.8       2.7   -0.13               K.VIVSVR.V   9.4       3.8   -0.11               K.VIERR.I   9.4       3.8   -0.11               R.VIRER.V   9.4       3.8   -0.11               K.VLERR.A   9.4       3.8   -0.10               R.VLGVER.A ``` | |

|  |  |
| --- | --- |
| |  | | --- | | Top scoring peptide matches to query 509 25: Sum of 6 scans in range 139 (rt=11.4265, f=2, i=26) to 176 (rt=13.2277, f=7, i=11) [\\172.16.3.18\masslynx\2009.PRO\Data\20090916\_24\_qdda.raw] Score greater than 24 indicates homology Score greater than 28 indicates identity  ``` Score    Expect   Delta  Hit  Protein Peptide  16.0      0.84   -0.08               R.VIDAVR.F  16.0      0.84   -0.08   14   P02766 K.VLDAVR.G  11.1       2.6   -0.09               R.VIRER.V  11.1       2.6   -0.08               R.VLGVER.A  11.1       2.6   -0.09               VLRER   9.2         4   -0.06               K.VNNGIR.D   7.0       6.6   -0.12               K.VIVSVR.V   6.6       7.2   -0.12               R.VLATLR.G   6.6       7.3   -0.12               R.LLTLGR.T   5.6       9.1   -0.01               R.DPDVAR.E ``` | |

|  |  |
| --- | --- |
| |  | | --- | | Top scoring peptide matches to query 510 85: Sum of 2 scans in range 381 (rt=23.1929, f=6, i=36) to 387 (rt=23.4916, f=6, i=37) [\\172.16.3.18\masslynx\2009.PRO\Data\20090915\_13\_qdda.raw] Score greater than 28 indicates identity  ``` Score    Expect   Delta  Hit  Protein Peptide  30.3     0.031   -0.08               R.VIDAVR.F  30.3     0.031   -0.08   14   P02766 K.VLDAVR.G  16.8      0.69   -0.11               K.VIVSVR.V  12.0       2.1   -0.11               R.VLATLR.G  10.5       2.9   -0.01               R.DPDVAR.E   9.8       3.5   -0.05               K.VNNGIR.D   9.1       4.1   -0.09               K.VIERR.I   9.1       4.1   -0.09               R.VIRER.V   9.1       4.1   -0.09               K.VLERR.A   9.1       4.1   -0.08               R.VLGVER.A ``` | |

|  |  |
| --- | --- |
| |  | | --- | | Top scoring peptide matches to query 511 66: Sum of 4 scans in range 377 (rt=22.8634, f=2, i=70) to 402 (rt=24.0804, f=6, i=41) [\\172.16.3.18\masslynx\2009.PRO\Data\20090915\_17\_qdda.raw] Score greater than 28 indicates identity  ``` Score    Expect   Delta  Hit  Protein Peptide  27.6     0.058   -0.06               R.VIDAVR.F  27.6     0.058   -0.06   14   P02766 K.VLDAVR.G  15.5      0.94   -0.04               K.VNNGIR.D  13.7       1.4   -0.10               K.VIVSVR.V  13.2       1.6   -0.06               R.VLGVER.A  11.8       2.2   -0.10               R.VLATLR.G  10.4         3    0.01               R.DPDVAR.E   9.4       3.8   -0.06               K.VEAVVR.T   9.4       3.8   -0.08               R.VWLVR.V   9.0       4.2   -0.07               K.VIERR.I ``` | |

|  |  |
| --- | --- |
| |  | | --- | | Top scoring peptide matches to query 512 30: Sum of 16 scans in range 149 (rt=11.9129, f=3, i=13) to 209 (rt=14.8471, f=6, i=14) [\\172.16.3.18\masslynx\2009.PRO\Data\20090916\_28\_qdda.raw] Score greater than 27 indicates homology Score greater than 28 indicates identity  ``` Score    Expect   Delta  Hit  Protein Peptide  20.3      0.31   -0.06               R.VIDAVR.F  20.3      0.31   -0.06   14   P02766 K.VLDAVR.G  13.1       1.6   -0.04               K.VNNGIR.D   9.0       4.1   -0.10               K.VIVSVR.V   8.8       4.3   -0.10               R.LLTLGR.T   8.3       4.9   -0.07               R.VIRER.V   8.3       4.9   -0.06               R.VLGVER.A   8.3       4.9   -0.07               VLRER   6.8         7   -0.08               K.IVWVR.F   6.7       7.1   -0.10               R.VLATLR.G ``` | |

|  |  |
| --- | --- |
| |  | | --- | | Top scoring peptide matches to query 513 48: Sum of 6 scans in range 281 (rt=18.3132, f=5, i=25) to 297 (rt=19.0966, f=2, i=62) [\\172.16.3.18\masslynx\2009.PRO\Data\20090915\_21\_qdda.raw] Score greater than 28 indicates identity  ``` Score    Expect   Delta  Hit  Protein Peptide  29.3     0.039   -0.06               R.VIDAVR.F  29.3     0.039   -0.06   14   P02766 K.VLDAVR.G  16.7      0.71   -0.10               R.VLATLR.G  16.2      0.79   -0.10               K.VIVSVR.V  14.2       1.3   -0.03               K.VNNGIR.D  14.0       1.3    0.01               R.DPDVAR.E  12.3         2   -0.07               K.VIERR.I  12.3         2   -0.07               R.VIRER.V  12.3         2   -0.07               K.VLERR.A  12.3         2   -0.06               R.VLGVER.A ``` | |

|  |  |
| --- | --- |
| |  | | --- | | Top scoring peptide matches to query 514 75: Sum of 2 scans in range 404 (rt=24.0417, f=3, i=46) to 410 (rt=24.3404, f=3, i=47) [\\172.16.3.18\masslynx\2009.PRO\Data\20090916\_36\_qdda.raw] Score greater than 28 indicates identity  ``` Score    Expect   Delta  Hit  Protein Peptide  24.3      0.12   -0.05               R.VIDAVR.F  24.3      0.12   -0.05   14   P02766 K.VLDAVR.G  15.1         1   -0.09               R.VLATLR.G  12.8       1.7    0.02               R.DPDVAR.E  12.8       1.7   -0.03               K.VNNGIR.D  11.0       2.7   -0.07               K.VIERR.I  11.0       2.7   -0.07               R.VIRER.V  11.0       2.7   -0.09               K.VIVSVR.V  11.0       2.7   -0.07               K.VLERR.A  11.0       2.7   -0.05               R.VLGVER.A ``` | |

|  |  |
| --- | --- |
| |  | | --- | | Top scoring peptide matches to query 515 42: Sum of 23 scans in range 249 (rt=16.6766, f=2, i=45) to 318 (rt=20.0384, f=3, i=46) [\\172.16.3.18\masslynx\2009.PRO\Data\20090917\_24\_qdda.raw] Score greater than 22 indicates homology Score greater than 28 indicates identity  ``` Score    Expect   Delta  Hit  Protein Peptide  17.1      0.64   -0.05               R.VIDAVR.F  17.1      0.64   -0.05   14   P02766 K.VLDAVR.G   8.5       4.6   -0.03               K.VNNGIR.D   7.5       5.9   -0.09               K.VIVSVR.V   6.6       7.2   -0.06               R.VIRER.V   6.6       7.2   -0.05               R.VLGVER.A   6.6       7.2   -0.06               VLRER   6.5       7.4   -0.07               K.IVWVR.F   6.3       7.7   -0.09               R.LLTLGR.T   3.1        16   -0.06               LVRER ``` | |

|  |  |
| --- | --- |
| |  | | --- | | Top scoring peptide matches to query 517 88: Sum of 4 scans in range 391 (rt=23.6286, f=6, i=29) to 412 (rt=24.6537, f=5, i=43) [\\172.16.3.18\masslynx\2009.PRO\Data\20090915\_09\_qdda.raw] Score greater than 28 indicates identity  ``` Score    Expect   Delta  Hit  Protein Peptide  26.0     0.083   -0.05               R.VIDAVR.F  26.0     0.083   -0.05   14   P02766 K.VLDAVR.G  13.7       1.4   -0.03               K.VNNGIR.D  13.7       1.4    0.02               R.DPDVAR.E  13.1       1.6   -0.09               R.VLATLR.G  11.6       2.3   -0.09               K.VIVSVR.V   7.9       5.4   -0.06               K.VIERR.I   7.9       5.4   -0.06               R.VIRER.V   7.9       5.4   -0.06               K.VLERR.A   7.9       5.4   -0.05               R.VLGVER.A ``` | |

|  |  |
| --- | --- |
| |  | | --- | | Top scoring peptide matches to query 518 59: Sum of 8 scans in range 314 (rt=19.9336, f=4, i=35) to 373 (rt=22.8027, f=6, i=31) [\\172.16.3.18\masslynx\2009.PRO\Data\20090916\_32\_qdda.raw] Score greater than 28 indicates identity  ``` Score    Expect   Delta  Hit  Protein Peptide  27.4      0.06   -0.05               R.VIDAVR.F  27.4      0.06   -0.05   14   P02766 K.VLDAVR.G  15.3      0.97   -0.03               K.VNNGIR.D  13.6       1.4   -0.09               K.VIVSVR.V  11.6       2.3   -0.09               R.VLATLR.G  10.3       3.1    0.02               R.DPDVAR.E   8.9       4.3   -0.06               K.VIERR.I   8.9       4.3   -0.06               R.VIRER.V   8.9       4.3   -0.06               K.VLERR.A   8.9       4.3   -0.05               R.VLGVER.A ``` | |

|  |  |
| --- | --- |
| |  | | --- | | Top scoring peptide matches to query 519 57: Sum of 2 scans in range 292 (rt=18.4426, f=2, i=27) to 293 (rt=18.4851, f=2, i=28) [\\172.16.3.18\masslynx\2009.PRO\Data\20090915\_25\_qdda.raw] Score greater than 18 indicates homology Score greater than 28 indicates identity  ``` Score    Expect   Delta  Hit  Protein Peptide   9.2         4   -0.05               R.VIDAVR.F   9.2         4   -0.05   14   P02766 K.VLDAVR.G   9.2         4   -0.02               K.VNNGIR.D   5.3       9.7   -0.03               R.RGGGGLR.G   5.3       9.7   -0.03               K.RGNGLR.A   2.8        18   -0.02               K.AQQVAR.R   2.5        19   -0.05               R.VGLLDR.V   0.8        28   -0.05               K.DIVGLR.T   0.8        28    0.02               R.DPDVAR.E   0.8        28   -0.05               K.DVIGLR.I ``` | |

|  |  |
| --- | --- |
| |  | | --- | | Top scoring peptide matches to query 520 34: Sum of 23 scans in range 230 (rt=15.8238, f=6, i=23) to 335 (rt=20.905, f=5, i=27) [\\172.16.3.18\masslynx\2009.PRO\Data\20090917\_20\_qdda.raw] Score greater than 27 indicates homology Score greater than 28 indicates identity  ``` Score    Expect   Delta  Hit  Protein Peptide  18.1      0.51   -0.05               R.VIDAVR.F  18.1      0.51   -0.05   14   P02766 K.VLDAVR.G  13.2       1.6   -0.02               K.VNNGIR.D   8.8       4.3   -0.08               R.VLATLR.G   7.5       5.9   -0.08               K.VIVSVR.V   7.3       6.1    0.03               R.DPDVAR.E   6.0       8.3   -0.06               K.VIERR.I   6.0       8.3   -0.06               R.VIRER.V   6.0       8.3   -0.06               K.VLERR.A   6.0       8.3   -0.05               R.VLGVER.A ``` | |

|  |  |
| --- | --- |
| |  | | --- | | Top scoring peptide matches to query 521 52: Sum of 3 scans in range 280 (rt=17.8798, f=2, i=26) to 286 (rt=18.1712, f=7, i=20) [\\172.16.3.18\masslynx\2009.PRO\Data\20090915\_25\_qdda.raw] Score greater than 28 indicates identity  ``` Score    Expect   Delta  Hit  Protein Peptide  22.0      0.21   -0.05               R.VIDAVR.F  22.0      0.21   -0.05   14   P02766 K.VLDAVR.G  14.0       1.3   -0.02               K.VNNGIR.D  10.1       3.2   -0.08               R.VLATLR.G   9.0       4.2   -0.08               K.VIVSVR.V   8.8       4.3    0.03               R.DPDVAR.E   7.4         6   -0.06               K.VIERR.I   7.4         6   -0.06               R.VIRER.V   7.4         6   -0.06               K.VLERR.A   7.4         6   -0.05               R.VLGVER.A ``` | |

|  |  |
| --- | --- |
| |  | | --- | | Top scoring peptide matches to query 522 48: Sum of 4 scans in range 263 (rt=17.0808, f=2, i=24) to 273 (rt=17.5587, f=2, i=25) [\\172.16.3.18\masslynx\2009.PRO\Data\20090915\_25\_qdda.raw] Score greater than 26 indicates homology Score greater than 28 indicates identity  ``` Score    Expect   Delta  Hit  Protein Peptide  20.8      0.28   -0.04               R.VIDAVR.F  20.8      0.28   -0.04   14   P02766 K.VLDAVR.G  12.0       2.1   -0.02               K.VNNGIR.D   8.3         5   -0.08               R.VLATLR.G   8.2         5   -0.08               K.VIVSVR.V   7.6       5.7    0.03               R.DPDVAR.E   6.6       7.2   -0.02               K.AQQVAR.R   6.6       7.2   -0.04               K.DIVGLR.T   6.6       7.2   -0.04               K.DVIGLR.I   6.6       7.2   -0.01               R.EPTLGR.L ``` | |

|  |  |
| --- | --- |
| |  | | --- | | Top scoring peptide matches to query 523 43: Sum of 3 scans in range 244 (rt=16.1893, f=2, i=22) to 255 (rt=16.7171, f=2, i=23) [\\172.16.3.18\masslynx\2009.PRO\Data\20090915\_25\_qdda.raw] Score greater than 25 indicates homology Score greater than 28 indicates identity  ``` Score    Expect   Delta  Hit  Protein Peptide  16.2      0.79   -0.04               R.VIDAVR.F  16.2      0.79   -0.04   14   P02766 K.VLDAVR.G  16.2      0.79   -0.02               K.VNNGIR.D  11.6       2.3   -0.03               R.GRGGLGR.G  11.6       2.3   -0.03               R.GRNLGR.R   9.3       3.9   -0.03               K.MVPAVR.E   8.1       5.1    0.02               R.GSAGPQR.S   7.6       5.8   -0.08               R.LLTLGR.T   7.2       6.3   -0.02               K.AQQVAR.R   7.2       6.3   -0.04               K.DIVGLR.T ``` | |

|  |  |
| --- | --- |
| |  | | --- | | Top scoring peptide matches to query 524 37: Sum of 5 scans in range 202 (rt=14.2718, f=6, i=17) to 218 (rt=15.0211, f=2, i=20) [\\172.16.3.18\masslynx\2009.PRO\Data\20090915\_25\_qdda.raw] Score greater than 22 indicates homology Score greater than 28 indicates identity  ``` Score    Expect   Delta  Hit  Protein Peptide  14.8       1.1   -0.02               K.MVPAVR.E  14.8       1.1   -0.04               R.VIDAVR.F  14.8       1.1   -0.04   14   P02766 K.VLDAVR.G   8.7       4.5   -0.05               K.IREVR.Q   8.7       4.5   -0.05               K.RIEVR.V   8.7       4.5   -0.05               K.RLEVR.K   7.3       6.2   -0.04               K.VEAVVR.T   7.3       6.2   -0.08               K.VIVSVR.V   7.3       6.2   -0.06               R.VWLVR.V   6.4       7.6   -0.05               K.IRDLR.M ``` | |

|  |  |
| --- | --- |
| |  | | --- | | Top scoring peptide matches to query 525 58: Sum of 3 scans in range 298 (rt=18.7139, f=2, i=29) to 300 (rt=18.8064, f=3, i=27) [\\172.16.3.18\masslynx\2009.PRO\Data\20090915\_25\_qdda.raw] Score greater than 21 indicates homology Score greater than 28 indicates identity  ``` Score    Expect   Delta  Hit  Protein Peptide   8.6       4.6   -0.02               K.MVPAVR.E   8.6       4.6   -0.03               R.VIDAVR.F   8.6       4.6   -0.03   14   P02766 K.VLDAVR.G ``` | |

|  |  |
| --- | --- |
| |  | | --- | | Top scoring peptide matches to query 526 30: Sum of 5 scans in range 183 (rt=13.5562, f=7, i=10) to 197 (rt=14.2399, f=5, i=15) [\\172.16.3.18\masslynx\2009.PRO\Data\20090930\_36\_qdda.raw] Score greater than 28 indicates identity  ``` Score    Expect   Delta  Hit  Protein Peptide  30.9     0.027   -0.03               R.VIDAVR.F  30.9     0.027   -0.03   14   P02766 K.VLDAVR.G  16.1      0.82   -0.07               K.VIVSVR.V  14.6       1.2   -0.01               K.VNNGIR.D  14.0       1.3    0.04               R.DPDVAR.E  13.5       1.5   -0.07               R.VLATLR.G  10.9       2.7   -0.04               K.VIERR.I  10.9       2.7   -0.04               R.VIRER.V  10.9       2.7   -0.04               K.VLERR.A  10.9       2.7   -0.03               R.VLGVER.A ``` | |

|  |  |
| --- | --- |
| |  | | --- | | Top scoring peptide matches to query 528 85: Sum of 2 scans in range 410 (rt=24.3985, f=4, i=40) to 416 (rt=24.6972, f=4, i=41) [\\172.16.3.18\masslynx\2009.PRO\Data\20090916\_40\_qdda.raw] Score greater than 28 indicates identity  ``` Score    Expect   Delta  Hit  Protein Peptide  29.3     0.039   -0.02               R.VIDAVR.F  29.3     0.039   -0.02   14   P02766 K.VLDAVR.G  15.2      0.99   -0.06               K.VIVSVR.V  12.8       1.7   -0.06               R.VLATLR.G  12.6       1.8    0.00               K.VNNGIR.D  12.2         2    0.05               R.DPDVAR.E  10.4         3   -0.04               K.VIERR.I  10.4         3   -0.04               R.VIRER.V  10.4         3   -0.04               K.VLERR.A  10.4         3   -0.02               R.VLGVER.A ``` | |

|  |  |
| --- | --- |
| |  | | --- | | Top scoring peptide matches to query 529 74: Sum of 4 scans in range 411 (rt=24.3608, f=5, i=30) to 435 (rt=25.5426, f=5, i=33) [\\172.16.3.18\masslynx\2009.PRO\Data\20090916\_44\_qdda.raw] Score greater than 26 indicates homology Score greater than 28 indicates identity  ``` Score    Expect   Delta  Hit  Protein Peptide  23.4      0.15   -0.02               R.VIDAVR.F  23.4      0.15   -0.02   14   P02766 K.VLDAVR.G  12.0       2.1    0.00               K.VNNGIR.D  12.0       2.1    0.05               R.DPDVAR.E  11.3       2.4   -0.06               R.VLATLR.G   9.8       3.5   -0.06               K.VIVSVR.V   7.1       6.5   -0.03               K.VIERR.I   7.1       6.5   -0.03               R.VIRER.V   7.1       6.5   -0.03               K.VLERR.A   7.1       6.5   -0.02               R.VLGVER.A ``` | |

|  |  |
| --- | --- |
| |  | | --- | | Top scoring peptide matches to query 531 73: Sum of 4 scans in range 380 (rt=22.9254, f=4, i=31) to 392 (rt=23.5098, f=4, i=34) [\\172.16.3.18\masslynx\2009.PRO\Data\20090915\_\_05\_qdda.raw] Score greater than 28 indicates identity  ``` Score    Expect   Delta  Hit  Protein Peptide  26.1     0.081   -0.02               R.VIDAVR.F  26.1     0.081   -0.02   14   P02766 K.VLDAVR.G  15.2         1    0.01               K.VNNGIR.D  13.0       1.7   -0.05               K.VIVSVR.V  10.8       2.8   -0.05               R.VLATLR.G   9.6       3.6    0.06               R.DPDVAR.E   9.6       3.7   -0.02               K.VEAVVR.T   9.6       3.7   -0.03               R.VWLVR.V   8.4       4.8   -0.03               K.VIERR.I   8.4       4.8   -0.03               R.VIRER.V ``` | |

|  |  |
| --- | --- |
| |  | | --- | | Top scoring peptide matches to query 553 21: Sum of 2 scans in range 116 (rt=10.2963, f=6, i=3) to 122 (rt=10.5949, f=6, i=4) [\\172.16.3.18\masslynx\2009.PRO\Data\20090916\_28\_qdda.raw] Score greater than 20 indicates homology Score greater than 33 indicates identity  ``` Score    Expect   Delta  Hit  Protein Peptide   7.6        20   -0.14               R.LNLYR.R   7.0        22   -0.14   24   P02649 R.LVQYR.G   6.8        24   -0.11               R.FLNER.R   6.6        24   -0.11               K.IFQDR.E   6.6        24   -0.15               K.IFSRR.Y   6.6        24   -0.11               LFDQR   6.6        24   -0.11               LFQDR   6.6        24   -0.15               R.LFRSR.S   6.6        24   -0.15               LFSRR   6.6        24   -0.07               K.LMENR.K ``` | |

|  |  |
| --- | --- |
| |  | | --- | | Top scoring peptide matches to query 557 39: Scan 217 (rt=15.1754, f=6, i=20) [\\172.16.3.18\masslynx\2009.PRO\Data\20090917\_24\_qdda.raw] Score greater than 17 indicates homology Score greater than 35 indicates identity  ``` Score    Expect   Delta  Hit  Protein Peptide   6.5        42   -0.02   20   P0C0L4 K.GSVFLR.N   4.2        71    0.02               R.DQIFR.Y   4.2        71    0.02               K.EGGLFR.Q   4.2        71    0.05               ENIMR   4.2        71    0.02               R.QDLFR.G   4.2        71    0.05               R.QDLMR.R   4.2        71    0.00               R.SRLMR.Q   0.1  1.8e+002   -0.03               RSIFR   0.1  1.8e+002   -0.03               RSLFR   0.1  1.8e+002   -0.03               SRLFR ``` | |

|  |  |
| --- | --- |
| |  | | --- | | Top scoring peptide matches to query 558 40: Scan 244 (rt=16.4408, f=2, i=44) [\\172.16.3.18\masslynx\2009.PRO\Data\20090917\_24\_qdda.raw] Score greater than 17 indicates homology Score greater than 35 indicates identity  ``` Score    Expect   Delta  Hit  Protein Peptide  16.3       4.4   -0.01   20   P0C0L4 K.GSVFLR.N   3.7        80   -0.01               LNYLR   0.5  1.6e+002    0.02               K.IFQDR.E   0.5  1.6e+002   -0.02               K.IFSRR.Y   0.5  1.6e+002    0.02               LFDQR   0.5  1.6e+002    0.02               LFQDR   0.5  1.6e+002   -0.02               R.LFRSR.S   0.5  1.6e+002   -0.02               LFSRR   0.5  1.6e+002    0.01               R.LMRSR.T ``` | |

|  |  |
| --- | --- |
| |  | | --- | | Top scoring peptide matches to query 575 23: Sum of 2 scans in range 158 (rt=12.198, f=6, i=7) to 164 (rt=12.4967, f=6, i=8) [\\172.16.3.18\masslynx\2009.PRO\Data\20090930\_26\_qdda.raw] Score greater than 17 indicates homology Score greater than 28 indicates identity  ``` Score    Expect   Delta  Hit  Protein Peptide  11.3       2.6   -0.04    2   P01024 R.FSCQR.R  11.3       2.6   -0.09               R.FSYNR.Y  11.3       2.6   -0.01               -.MSACGR.K  11.3       2.6   -0.01               -.MSCAGR.A   3.7        15   -0.04               K.FASCGR.W   3.7        15   -0.04               FCSQR   3.7        15   -0.04               R.FCTNR.R   3.7        15   -0.14               R.FHLNR.S   3.7        15   -0.15               FHRAR   3.7        15   -0.15               FRAHR ``` | |

|  |  |
| --- | --- |
| |  | | --- | | Top scoring peptide matches to query 631 8: Sum of 4 scans in range 101 (rt=9.51803, f=3, i=3) to 119 (rt=10.4141, f=3, i=6) [\\172.16.3.18\masslynx\2009.PRO\Data\20090915\_21\_qdda.raw] Score greater than 16 indicates homology Score greater than 25 indicates identity  ``` Score    Expect   Delta  Hit  Protein Peptide   5.6         5   -0.15               K.SASEFR.S   5.6         5   -0.15               R.SASFER.D   5.6         5   -0.18               K.SGTLYR.L   3.2       8.8   -0.15               R.EQYTR.Y   3.2       8.8   -0.15   35   P02763 R.EYQTR.Q   1.1        14   -0.19               K.EALAHR.W   0.7        16   -0.18               R.SLFSSR.V ``` | |

|  |  |
| --- | --- |
| |  | | --- | | Top scoring peptide matches to query 667 22: Sum of 2 scans in range 121 (rt=10.5446, f=2, i=26) to 127 (rt=10.8433, f=2, i=27) [\\172.16.3.18\masslynx\2009.PRO\Data\20090916\_32\_qdda.raw] Score greater than 27 indicates identity  ``` Score    Expect   Delta  Hit  Protein Peptide  24.4      0.11   -0.12    3   P02671 K.DLLPSR.D  22.6      0.16   -0.15               R.DILALR.V  22.6      0.16   -0.12               DLISPR  11.6         2   -0.08               K.DLEAPR.K  11.6         2   -0.12               R.DLPVTR.T  10.9       2.3   -0.12               R.VELPSR.T  10.7       2.4   -0.12               R.DSIIPR.S  10.7       2.4   -0.12               K.DSLLPR.S   9.6       3.2   -0.15               R.LDIALR.N   9.0       3.6   -0.08               R.DAEIPR.H ``` | |

|  |  |
| --- | --- |
| |  | | --- | | Top scoring peptide matches to query 668 21: Sum of 2 scans in range 120 (rt=10.4936, f=4, i=5) to 126 (rt=10.7923, f=4, i=6) [\\172.16.3.18\masslynx\2009.PRO\Data\20090916\_24\_qdda.raw] Score greater than 20 indicates homology Score greater than 27 indicates identity  ``` Score    Expect   Delta  Hit  Protein Peptide  13.2       1.4   -0.14               R.DILALR.V  13.2       1.4   -0.11               DLISPR  13.2       1.4   -0.11    3   P02671 K.DLLPSR.D   6.7       6.2   -0.11               R.VELPSR.T   5.2       8.7   -0.07               K.DLEAPR.K   5.2       8.7   -0.11               R.DLPVTR.T   3.4        13   -0.14               R.LDIALR.N ``` | |

|  |  |
| --- | --- |
| |  | | --- | | Top scoring peptide matches to query 669 24: Sum of 4 scans in range 131 (rt=11.0197, f=5, i=6) to 149 (rt=11.9158, f=5, i=9) [\\172.16.3.18\masslynx\2009.PRO\Data\20090917\_28\_qdda.raw] Score greater than 27 indicates identity  ``` Score    Expect   Delta  Hit  Protein Peptide  24.1      0.11   -0.10    3   P02671 K.DLLPSR.D  22.3      0.17   -0.13               R.DILALR.V  22.3      0.17   -0.10               DLISPR  11.3       2.1   -0.06               K.DLEAPR.K  11.3       2.1   -0.10               R.DLPVTR.T  10.7       2.5   -0.10               R.VELPSR.T   9.3       3.4   -0.13               R.LDIALR.N   2.4        17   -0.10               M.DPSLLR.E   1.6        20   -0.10               R.DTVPIR.F   1.5        20   -0.06               R.DAEIPR.H ``` | |

|  |  |
| --- | --- |
| |  | | --- | | Top scoring peptide matches to query 670 10: Sum of 4 scans in range 128 (rt=10.7748, f=2, i=23) to 144 (rt=11.5713, f=2, i=26) [\\172.16.3.18\masslynx\2009.PRO\Data\20090917\_16\_qdda.raw] Score greater than 25 indicates homology Score greater than 27 indicates identity  ``` Score    Expect   Delta  Hit  Protein Peptide  21.8      0.19   -0.10               R.DILALR.V  21.8      0.19   -0.07               DLISPR  21.8      0.19   -0.07    3   P02671 K.DLLPSR.D  10.8       2.4   -0.03               K.DLEAPR.K  10.8       2.4   -0.07               R.DLPVTR.T   8.9       3.7   -0.07               R.VELPSR.T   8.8       3.8   -0.10               R.LDIALR.N   2.0        18   -0.07               M.DPSLLR.E   1.1        22   -0.03               R.DAEIPR.H   1.1        22    0.01               R.DAMAHR.I ``` | |

|  |  |
| --- | --- |
| |  | | --- | | Top scoring peptide matches to query 671 19: Sum of 2 scans in range 154 (rt=11.9989, f=2, i=33) to 160 (rt=12.2976, f=2, i=34) [\\172.16.3.18\masslynx\2009.PRO\Data\20090930\_26\_qdda.raw] Score greater than 27 indicates identity  ``` Score    Expect   Delta  Hit  Protein Peptide  18.8      0.38   -0.06    3   P02671 K.DLLPSR.D  17.4      0.52   -0.10               R.DILALR.V  17.4      0.52   -0.06               DLISPR  11.8       1.9   -0.06               R.VELPSR.T  10.4       2.6   -0.06               M.DPSLLR.E   8.4       4.1   -0.02               K.DLEAPR.K   8.4       4.1   -0.06               R.DLPVTR.T   8.2       4.4   -0.02               R.DAEIPR.H   8.2       4.4    0.02               R.DAMAHR.I   8.2       4.4   -0.02               R.DPALER.R ``` | |

|  |  |
| --- | --- |
| |  | | --- | | Top scoring peptide matches to query 672 24: Sum of 2 scans in range 133 (rt=11.0408, f=5, i=3) to 139 (rt=11.3394, f=5, i=4) [\\172.16.3.18\masslynx\2009.PRO\Data\20090916\_36\_qdda.raw] Score greater than 15 indicates homology Score greater than 27 indicates identity  ``` Score    Expect   Delta  Hit  Protein Peptide   4.8       9.4   -0.05               DLISPR   2.2        17   -0.05    3   P02671 K.DLLPSR.D   1.4        21   -0.05               M.DPSLLR.E   1.3        21   -0.09               R.DILALR.V ``` | |

|  |  |
| --- | --- |
| |  | | --- | | Top scoring peptide matches to query 673 20: Sum of 2 scans in range 152 (rt=12.0393, f=3, i=9) to 158 (rt=12.338, f=3, i=10) [\\172.16.3.18\masslynx\2009.PRO\Data\20090930\_31\_qdda.raw] Score greater than 27 indicates identity  ``` Score    Expect   Delta  Hit  Protein Peptide  24.6     0.099   -0.04    3   P02671 K.DLLPSR.D  15.4      0.83   -0.08               R.DILALR.V  15.4      0.83   -0.04               DLISPR  12.0       1.8   -0.04               R.VELPSR.T   5.9       7.4   -0.01               K.DLEAPR.K   5.9       7.4   -0.04               R.DLPVTR.T   4.7       9.8    0.04               R.HMGPSR.N   4.3        11   -0.08               R.LDIALR.N   4.1        11   -0.01               R.EVAPER.T   3.1        14   -0.08               K.AIEVLR.R ``` | |

|  |  |
| --- | --- |
| |  | | --- | | Top scoring peptide matches to query 674 17: Sum of 2 scans in range 149 (rt=11.89, f=2, i=45) to 155 (rt=12.1887, f=2, i=46) [\\172.16.3.18\masslynx\2009.PRO\Data\20090930\_36\_qdda.raw] Score greater than 27 indicates identity  ``` Score    Expect   Delta  Hit  Protein Peptide  21.1      0.22   -0.04    3   P02671 K.DLLPSR.D  19.7      0.31   -0.04               DLISPR  18.4      0.41   -0.08               R.DILALR.V  12.6       1.6   -0.04               R.VELPSR.T  10.4       2.6   -0.04               M.DPSLLR.E  10.0       2.9   -0.00               K.DLEAPR.K  10.0       2.9   -0.04               R.DLPVTR.T   8.3       4.2   -0.00               R.DAEIPR.H   8.3       4.2    0.04               R.DAMAHR.I   8.3       4.2   -0.00               R.DPALER.R ``` | |

|  |  |
| --- | --- |
| |  | | --- | | Top scoring peptide matches to query 675 17: Sum of 2 scans in range 149 (rt=11.8468, f=2, i=49) to 155 (rt=12.1454, f=2, i=50) [\\172.16.3.18\masslynx\2009.PRO\Data\20090930\_41\_qdda.raw] Score greater than 27 indicates identity  ``` Score    Expect   Delta  Hit  Protein Peptide  18.6       0.4   -0.03    3   P02671 K.DLLPSR.D  17.1      0.56   -0.03               DLISPR  15.8      0.76   -0.07               R.DILALR.V   7.8       4.8    0.01               K.DLEAPR.K   7.8       4.8   -0.03               R.DLPVTR.T   6.3       6.7   -0.03               R.VELPSR.T   5.1       8.9   -0.07               R.LDIALR.N   2.0        18    0.08               K.CGTAFR.E   1.1        22   -0.03               M.DPSLLR.E ``` | |

|  |  |
| --- | --- |
| |  | | --- | | Top scoring peptide matches to query 772 42: Sum of 2 scans in range 213 (rt=14.9345, f=3, i=16) to 219 (rt=15.2331, f=3, i=17) [\\172.16.3.18\masslynx\2009.PRO\Data\20090915\_09\_qdda.raw] Score greater than 15 indicates homology Score greater than 25 indicates identity  ``` Score    Expect   Delta  Hit  Protein Peptide   3.3       8.6   -0.03    3   P02671 K.CPSGCR.M   2.7       9.9   -0.07               R.CALCGR.S ``` | |

|  |  |
| --- | --- |
| |  | | --- | | Top scoring peptide matches to query 789 13: Sum of 2 scans in range 127 (rt=10.7993, f=2, i=32) to 133 (rt=11.098, f=2, i=33) [\\172.16.3.18\masslynx\2009.PRO\Data\20090915\_21\_qdda.raw] Score greater than 30 indicates identity  ``` Score    Expect   Delta  Hit  Protein Peptide  28.8      0.07   -0.16               R.ISVSRR.T  27.1       0.1   -0.15    8   P02675 K.ISQLTR.M  20.8      0.44   -0.15               R.LSGATIR.I  18.6      0.72   -0.12               R.AEVSRR.E  18.6      0.72   -0.16               R.SIVRSR.A  16.1       1.3   -0.14               M.IWRSR.A  16.1       1.3   -0.08               K.LEGGGER.R  16.1       1.3   -0.09               R.LWDQR.K  16.1       1.3   -0.14               LWRSR  15.9       1.4   -0.12               K.ISARDR.G ``` | |

|  |  |
| --- | --- |
| |  | | --- | | Top scoring peptide matches to query 790 19: Sum of 2 scans in range 118 (rt=10.3941, f=2, i=24) to 124 (rt=10.6927, f=2, i=25) [\\172.16.3.18\masslynx\2009.PRO\Data\20090916\_24\_qdda.raw] Score greater than 30 indicates identity  ``` Score    Expect   Delta  Hit  Protein Peptide  28.2     0.079   -0.14               R.ISVSRR.T  21.1      0.41   -0.12               R.LSGATIR.I  18.6      0.73   -0.12    8   P02675 K.ISQLTR.M  18.1      0.82   -0.10               R.AEVSRR.E  18.1      0.82   -0.14               R.SIVRSR.A  15.6       1.5   -0.11               M.IWRSR.A  15.6       1.5   -0.05               K.LEGGGER.R  15.6       1.5   -0.07               R.LWDQR.K  15.6       1.5   -0.11               LWRSR  15.1       1.6   -0.10               K.ISARDR.G ``` | |

|  |  |
| --- | --- |
| |  | | --- | | Top scoring peptide matches to query 791 69: Sum of 2 scans in range 336 (rt=20.9372, f=2, i=77) to 342 (rt=21.2359, f=2, i=78) [\\172.16.3.18\masslynx\2009.PRO\Data\20090915\_09\_qdda.raw] Score greater than 30 indicates identity  ``` Score    Expect   Delta  Hit  Protein Peptide  28.5     0.074   -0.10               R.ISVSRR.T  25.9      0.13   -0.09    8   P02675 K.ISQLTR.M  19.5      0.59   -0.09               R.LSGATIR.I  18.4      0.77   -0.06               R.AEVSRR.E  18.4      0.77   -0.10               R.SIVRSR.A  15.8       1.4   -0.08               M.IWRSR.A  15.8       1.4   -0.02               K.LEGGGER.R  15.8       1.4   -0.03               R.LWDQR.K  15.8       1.4   -0.08               LWRSR  15.5       1.5   -0.06               K.ISARDR.G ``` | |

|  |  |
| --- | --- |
| |  | | --- | | Top scoring peptide matches to query 792 15: Sum of 5 scans in range 135 (rt=11.1292, f=4, i=4) to 163 (rt=12.4897, f=3, i=10) [\\172.16.3.18\masslynx\2009.PRO\Data\20090915\_17\_qdda.raw] Score greater than 30 indicates identity  ``` Score    Expect   Delta  Hit  Protein Peptide  28.8      0.07   -0.10               R.ISVSRR.T  24.7      0.18   -0.09    8   P02675 K.ISQLTR.M  20.6      0.46   -0.06               K.LSGRER.E  20.6      0.46   -0.05               LSNVER  19.7      0.57   -0.09               R.LSGATIR.I  18.7      0.72   -0.06               R.AEVSRR.E  18.7      0.72   -0.10               R.SIVRSR.A  17.3      0.99   -0.02               K.LEGGGER.R  16.1       1.3   -0.08               M.IWRSR.A  16.1       1.3   -0.03               R.LWDQR.K ``` | |

|  |  |
| --- | --- |
| |  | | --- | | Top scoring peptide matches to query 796 32: Sum of 5 scans in range 150 (rt=11.8666, f=6, i=5) to 192 (rt=13.911, f=3, i=14) [\\172.16.3.18\masslynx\2009.PRO\Data\20090916\_36\_qdda.raw] Score greater than 30 indicates identity  ``` Score    Expect   Delta  Hit  Protein Peptide  26.1      0.13   -0.06               R.ISVSRR.T  18.4      0.76   -0.05    8   P02675 K.ISQLTR.M  17.8      0.88    0.03               K.LEGGGER.R  17.5      0.94   -0.02               K.LSGRER.E  17.5      0.94   -0.01               LSNVER  16.5       1.2   -0.02               R.AEVSRR.E  16.5       1.2   -0.06               R.SIVRSR.A  16.3       1.2    0.01               R.LWDQR.K  14.3         2   -0.04               M.IWRSR.A  14.3         2   -0.04               LWRSR ``` | |

|  |  |
| --- | --- |
| |  | | --- | | Top scoring peptide matches to query 799 44: Sum of 3 scans in range 320 (rt=19.9357, f=5, i=19) to 332 (rt=20.5128, f=7, i=22) [\\172.16.3.18\masslynx\2009.PRO\Data\20090916\_44\_qdda.raw] Score greater than 20 indicates homology Score greater than 30 indicates identity  ``` Score    Expect   Delta  Hit  Protein Peptide  10.1       5.2   -0.05               R.ISVSRR.T   6.9        11    0.00               K.LSAEAAR.R   6.9        11   -0.01               K.LSGRER.E   6.7        11   -0.01               K.ISARDR.G   6.7        11    0.00               R.ISASSPR.V   6.7        11   -0.04    8   P02675 K.ISQLTR.M   6.7        11   -0.03               R.ISWRR.G   6.7        11   -0.01               M.LSARDR.R   6.7        11    0.00               K.LSASSPR.M   6.7        11   -0.01               K.LSERGR.S ``` | |

|  |  |
| --- | --- |
| |  | | --- | | Top scoring peptide matches to query 801 48: Sum of 2 scans in range 309 (rt=19.4185, f=5, i=17) to 323 (rt=20.1024, f=7, i=14) [\\172.16.3.18\masslynx\2009.PRO\Data\20090916\_36\_qdda.raw] Score greater than 24 indicates homology Score greater than 30 indicates identity  ``` Score    Expect   Delta  Hit  Protein Peptide  13.3       2.5   -0.03               R.LSGATIR.I  13.2       2.5   -0.04               R.ISVSRR.T  13.2       2.5   -0.03    8   P02675 K.ISQLTR.M  10.9       4.3   -0.00               R.AEVSRR.E  10.8       4.3   -0.02               M.IWRSR.A  10.8       4.3    0.04               K.LEGGGER.R  10.8       4.3    0.03               R.LWDQR.K  10.8       4.3   -0.02               LWRSR   9.2       6.4   -0.03               R.LGTGTLR.S   8.9       6.8    0.04               K.ADIENR.T ``` | |

|  |  |
| --- | --- |
| |  | | --- | | Top scoring peptide matches to query 802 52: Sum of 3 scans in range 349 (rt=21.3402, f=3, i=37) to 373 (rt=22.5085, f=4, i=37) [\\172.16.3.18\masslynx\2009.PRO\Data\20090916\_44\_qdda.raw] Score greater than 19 indicates homology Score greater than 30 indicates identity  ``` Score    Expect   Delta  Hit  Protein Peptide   7.0        11   -0.01               M.IWRSR.A   7.0        11   -0.01               LWRSR   6.2        13   -0.04               R.ISVSRR.T   6.2        13   -0.01               R.LLGSQLS.-   5.2        16    0.05               K.LEGGGER.R   4.9        17   -0.02    8   P02675 K.ISQLTR.M   4.9        17   -0.02               R.LSGATIR.I   4.1        21   -0.02               R.LGTGTLR.S   4.0        21    0.00               R.AEVSRR.E   1.1        41    0.03               R.LWDQR.K ``` | |

|  |  |
| --- | --- |
| |  | | --- | | Top scoring peptide matches to query 809 28: Sum of 4 scans in range 186 (rt=13.6035, f=2, i=37) to 211 (rt=14.8349, f=7, i=14) [\\172.16.3.18\masslynx\2009.PRO\Data\20090915\_13\_qdda.raw] Score greater than 29 indicates identity  ``` Score    Expect   Delta  Hit  Protein Peptide  31.0     0.032   -0.07    3   P02671 R.VSEDLR.S  20.6      0.35   -0.12               VMALLR  18.0      0.66   -0.08               K.VAEMIR.E  18.0      0.66   -0.12               K.VFSPIR.S  17.8      0.68   -0.04               K.WEDLR.R  15.3       1.2   -0.15               K.VFLAIR.R  14.2       1.6   -0.08               R.LAMDLR.M  13.0       2.1   -0.08               K.IMADIR.A  13.0       2.1   -0.08               -.MALDLR.T  13.0       2.1   -0.10               K.TITDLR.T ``` | |

|  |  |
| --- | --- |
| |  | | --- | | Top scoring peptide matches to query 821 23: Sum of 2 scans in range 133 (rt=11.1294, f=2, i=33) to 139 (rt=11.4281, f=2, i=34) [\\172.16.3.18\masslynx\2009.PRO\Data\20090916\_28\_qdda.raw] Score greater than 26 indicates homology Score greater than 30 indicates identity  ``` Score    Expect   Delta  Hit  Protein Peptide  34.6     0.019   -0.11   16   P04217 K.ELLVPR.S  11.4       3.9   -0.02               R.ETSHPR.Q  11.0       4.3   -0.04               R.IEDPPR.R  11.0       4.3   -0.02               K.NQPDPR.L   9.7       5.8   -0.05               K.EIHTAR.F   9.7       5.8   -0.05               R.ELHTAR.E   9.7       5.8   -0.11               R.ELPVLR.D   9.6       5.9   -0.04               M.EEPPVR.E   8.6       7.5   -0.09               R.NQVIPR.T   8.5       7.6   -0.09               K.NIQVPR.E ``` | |

|  |  |
| --- | --- |
| |  | | --- | | Top scoring peptide matches to query 823 79: Sum of 2 scans in range 374 (rt=22.7954, f=2, i=81) to 380 (rt=23.0941, f=2, i=82) [\\172.16.3.18\masslynx\2009.PRO\Data\20090915\_09\_qdda.raw] Score greater than 28 indicates homology Score greater than 30 indicates identity  ``` Score    Expect   Delta  Hit  Protein Peptide  38.4    0.0079   -0.08   16   P04217 K.ELLVPR.S  13.1       2.7    0.02               R.ETSHPR.Q  12.7       2.9   -0.01               R.IEDPPR.R  12.7       2.9    0.02               K.NQPDPR.L  10.1       5.3   -0.05               R.NQVIPR.T  10.0       5.4   -0.02               K.EIHTAR.F  10.0       5.4   -0.02               R.ELHTAR.E  10.0       5.4   -0.08               R.ELPVLR.D   9.9       5.6   -0.05               K.NIQVPR.E   9.9       5.6   -0.05               K.QVQVPR.G ``` | |

|  |  |
| --- | --- |
| |  | | --- | | Top scoring peptide matches to query 824 49: Sum of 4 scans in range 315 (rt=19.844, f=3, i=27) to 334 (rt=20.7767, f=2, i=63) [\\172.16.3.18\masslynx\2009.PRO\Data\20090915\_17\_qdda.raw] Score greater than 26 indicates homology Score greater than 30 indicates identity  ``` Score    Expect   Delta  Hit  Protein Peptide  34.5     0.019   -0.07   16   P04217 K.ELLVPR.S  11.5       3.9    0.03               R.ETSHPR.Q  11.0       4.3    0.01               R.IEDPPR.R  11.0       4.3    0.03               K.NQPDPR.L   9.4       6.2    0.01               M.EEPPVR.E   9.4       6.2   -0.01               K.EIHTAR.F   9.4       6.2   -0.01               R.ELHTAR.E   9.4       6.2   -0.07               R.ELPVLR.D   8.6       7.5   -0.04               K.NIQVPR.E   8.6       7.5   -0.04               R.NQVIPR.T ``` | |

|  |  |
| --- | --- |
| |  | | --- | | Top scoring peptide matches to query 825 39: Sum of 6 scans in range 236 (rt=16.1267, f=5, i=19) to 267 (rt=17.6438, f=2, i=58) [\\172.16.3.18\masslynx\2009.PRO\Data\20090915\_21\_qdda.raw] Score greater than 26 indicates homology Score greater than 30 indicates identity  ``` Score    Expect   Delta  Hit  Protein Peptide  34.4      0.02   -0.07   16   P04217 K.ELLVPR.S  11.4       3.9    0.03               R.ETSHPR.Q  10.9       4.4    0.01               R.IEDPPR.R  10.9       4.4    0.03               K.NQPDPR.L   9.8       5.7   -0.04               R.NQVIPR.T   9.7       5.8   -0.04               K.NIQVPR.E   9.7       5.8   -0.04               K.QVQVPR.G   8.2       8.2   -0.00               K.EIHTAR.F   8.2       8.2   -0.00               R.ELHTAR.E   8.2       8.2   -0.07               R.ELPVLR.D ``` | |

|  |  |
| --- | --- |
| |  | | --- | | Top scoring peptide matches to query 826 29: Sum of 2 scans in range 149 (rt=11.9333, f=7, i=11) to 155 (rt=12.232, f=7, i=12) [\\172.16.3.18\masslynx\2009.PRO\Data\20090916\_20\_qdda.raw] Score greater than 16 indicates homology Score greater than 30 indicates identity  ``` Score    Expect   Delta  Hit  Protein Peptide   6.3        13   -0.06   16   P04217 K.ELLVPR.S   3.6        24    0.05               K.TSSFER.E   2.5        30    0.05               R.STSFER.R   0.5        48    0.01               R.IEDPPR.R   0.5        48    0.01               R.IEPPDR.R ``` | |

|  |  |
| --- | --- |
| |  | | --- | | Top scoring peptide matches to query 827 25: Sum of 3 scans in range 172 (rt=12.8243, f=2, i=14) to 187 (rt=13.5517, f=2, i=16) [\\172.16.3.18\masslynx\2009.PRO\Data\20090915\_25\_qdda.raw] Score greater than 26 indicates homology Score greater than 30 indicates identity  ``` Score    Expect   Delta  Hit  Protein Peptide  34.5     0.019   -0.06   16   P04217 K.ELLVPR.S  11.4       3.9    0.04               R.ETSHPR.Q  11.0       4.3    0.02               R.IEDPPR.R  11.0       4.3    0.04               K.NQPDPR.L   8.7       7.3   -0.03               K.NIQVPR.E   8.7       7.3   -0.03               K.QVQVPR.G   8.5       7.6   -0.03               R.NQVIPR.T   8.5       7.7    0.02               M.EEPPVR.E   8.3       8.1    0.01               K.EIHTAR.F   8.3       8.1    0.01               R.ELHTAR.E ``` | |

|  |  |
| --- | --- |
| |  | | --- | | Top scoring peptide matches to query 828 42: Sum of 24 scans in range 189 (rt=13.8626, f=2, i=38) to 260 (rt=17.3109, f=7, i=28) [\\172.16.3.18\masslynx\2009.PRO\Data\20090916\_32\_qdda.raw] Score greater than 20 indicates homology Score greater than 30 indicates identity  ``` Score    Expect   Delta  Hit  Protein Peptide  20.7      0.46   -0.04   16   P04217 K.ELLVPR.S   6.6        12    0.02               K.EIHTAR.F   6.6        12    0.02               R.ELHTAR.E   6.6        12   -0.04               R.ELPVLR.D   4.7        18    0.07               K.ETSSFR.M   4.7        18    0.03               R.IEDPPR.R   3.7        23    0.06               R.ETSHPR.Q   3.5        24    0.03               M.EEPPVR.E   3.3        25    0.06               K.NQPDPR.L   3.3        25   -0.02               R.NQVIPR.T ``` | |

|  |  |
| --- | --- |
| |  | | --- | | Top scoring peptide matches to query 829 33: Sum of 2 scans in range 198 (rt=14.0723, f=2, i=17) to 207 (rt=14.5005, f=2, i=18) [\\172.16.3.18\masslynx\2009.PRO\Data\20090915\_25\_qdda.raw] Score greater than 14 indicates homology Score greater than 30 indicates identity  ``` Score    Expect   Delta  Hit  Protein Peptide  14.0       2.1   -0.04   16   P04217 K.ELLVPR.S   0.6        48    0.06               R.ETSHPR.Q ``` | |

|  |  |
| --- | --- |
| |  | | --- | | Top scoring peptide matches to query 830 28: Sum of 4 scans in range 187 (rt=13.7374, f=7, i=10) to 207 (rt=14.7126, f=4, i=20) [\\172.16.3.18\masslynx\2009.PRO\Data\20090917\_20\_qdda.raw] Score greater than 24 indicates homology Score greater than 30 indicates identity  ``` Score    Expect   Delta  Hit  Protein Peptide  23.2      0.26   -0.04   16   P04217 K.ELLVPR.S   9.6       5.9    0.06               R.ETSHPR.Q   8.7       7.2    0.02               K.EIHTAR.F   8.7       7.2    0.02               R.ELHTAR.E   8.7       7.2   -0.04               R.ELPVLR.D   7.8       8.9   -0.01               K.NIQVPR.E   7.8       8.9   -0.01               K.QVQVPR.G   7.3        10    0.04               M.EEPPVR.E   6.0        14    0.02               R.EALTHR.K   5.7        14    0.04               R.IEDPPR.R ``` | |

|  |  |
| --- | --- |
| |  | | --- | | Top scoring peptide matches to query 831 52: Sum of 3 scans in range 274 (rt=17.9888, f=2, i=55) to 290 (rt=18.7648, f=4, i=32) [\\172.16.3.18\masslynx\2009.PRO\Data\20090916\_32\_qdda.raw] Score greater than 19 indicates homology Score greater than 30 indicates identity  ``` Score    Expect   Delta  Hit  Protein Peptide  21.0      0.43   -0.04   16   P04217 K.ELLVPR.S   4.9        17    0.04               R.IEDPPR.R   3.7        23    0.03               K.EIHTAR.F   3.7        23    0.03               R.ELHTAR.E   0.3        51   -0.01               K.NIQVPR.E   0.3        51   -0.01               K.QVQVPR.G   0.2        51   -0.01               R.NQVIPR.T ``` | |

|  |  |
| --- | --- |
| |  | | --- | | Top scoring peptide matches to query 832 60: Sum of 3 scans in range 361 (rt=21.9548, f=5, i=22) to 377 (rt=22.7309, f=6, i=24) [\\172.16.3.18\masslynx\2009.PRO\Data\20090916\_36\_qdda.raw] Score greater than 26 indicates homology Score greater than 30 indicates identity  ``` Score    Expect   Delta  Hit  Protein Peptide  34.4     0.019   -0.03   16   P04217 K.ELLVPR.S  11.4       3.9    0.07               R.ETSHPR.Q  10.9       4.4    0.04               R.IEDPPR.R  10.9       4.4    0.07               K.NQPDPR.L   9.4       6.1    0.03               K.EIHTAR.F   9.4       6.1    0.03               R.ELHTAR.E   9.4       6.1   -0.03               R.ELPVLR.D   9.4       6.2    0.04               M.EEPPVR.E   8.5       7.6   -0.01               R.NQVIPR.T   8.4       7.7   -0.01               K.NIQVPR.E ``` | |

|  |  |
| --- | --- |
| |  | | --- | | Top scoring peptide matches to query 833 21: Sum of 4 scans in range 168 (rt=12.7398, f=4, i=6) to 193 (rt=13.9508, f=5, i=14) [\\172.16.3.18\masslynx\2009.PRO\Data\20090917\_16\_qdda.raw] Score greater than 24 indicates homology Score greater than 30 indicates identity  ``` Score    Expect   Delta  Hit  Protein Peptide  29.8     0.057   -0.03   16   P04217 K.ELLVPR.S   9.4       6.2   -0.00               K.NIQVPR.E   9.4       6.2   -0.00               K.QVQVPR.G   9.0       6.8    0.04               M.EEPPVR.E   6.9        11    0.04               R.IEDPPR.R   5.1        17   -0.00               R.NQVIPR.T   4.7        18    0.03               K.EIHTAR.F   4.7        18    0.03               R.ELHTAR.E   4.7        18   -0.03               R.ELPVLR.D   0.7        46    0.04               R.DLPEPR.V ``` | |

|  |  |
| --- | --- |
| |  | | --- | | Top scoring peptide matches to query 834 60: Sum of 4 scans in range 332 (rt=20.6161, f=3, i=44) to 358 (rt=21.8697, f=3, i=47) [\\172.16.3.18\masslynx\2009.PRO\Data\20090916\_40\_qdda.raw] Score greater than 18 indicates homology Score greater than 30 indicates identity  ``` Score    Expect   Delta  Hit  Protein Peptide  23.1      0.26   -0.03   16   P04217 K.ELLVPR.S   4.2        21    0.05               R.IEDPPR.R   1.2        41    0.00               K.NIQVPR.E   1.2        41    0.00               K.QVQVPR.G   1.1        42    0.00               R.NQVIPR.T   0.1        52    0.05               M.EEPPVR.E ``` | |

|  |  |
| --- | --- |
| |  | | --- | | Top scoring peptide matches to query 835 61: Sum of 2 scans in range 382 (rt=22.9434, f=2, i=77) to 388 (rt=23.2421, f=2, i=78) [\\172.16.3.18\masslynx\2009.PRO\Data\20090916\_44\_qdda.raw] Score greater than 21 indicates homology Score greater than 30 indicates identity  ``` Score    Expect   Delta  Hit  Protein Peptide  25.1      0.17   -0.02   16   P04217 K.ELLVPR.S   6.9        11    0.07               R.ETSHPR.Q   6.6        12    0.05               R.IEDPPR.R   6.6        12    0.07               K.NQPDPR.L   5.9        14    0.00               K.NIQVPR.E   5.9        14    0.00               K.QVQVPR.G   5.1        17    0.04               K.AQTGPPR.V   4.9        18    0.00               R.NQVIPR.T   4.4        20    0.05               M.EEPPVR.E   4.1        21    0.04               K.EIHTAR.F ``` | |

|  |  |
| --- | --- |
| |  | | --- | | Top scoring peptide matches to query 836 34: Sum of 6 scans in range 211 (rt=14.7825, f=5, i=12) to 233 (rt=15.8513, f=5, i=18) [\\172.16.3.18\masslynx\2009.PRO\Data\20090930\_26\_qdda.raw] Score greater than 25 indicates homology Score greater than 30 indicates identity  ``` Score    Expect   Delta  Hit  Protein Peptide  33.8     0.022   -0.02   16   P04217 K.ELLVPR.S  10.4         5    0.05               R.IEDPPR.R   9.2       6.5    0.00               R.NQVIPR.T   9.1       6.6    0.00               K.NIQVPR.E   9.1       6.6    0.00               K.QVQVPR.G   8.4       7.9    0.08               K.NQPDPR.L   7.6       9.5    0.04               K.EIHTAR.F   7.6       9.5    0.04               R.ELHTAR.E   7.6       9.5   -0.02               R.ELPVLR.D   7.5       9.7    0.05               M.EEPPVR.E ``` | |

|  |  |
| --- | --- |
| |  | | --- | | Top scoring peptide matches to query 837 47: Sum of 4 scans in range 304 (rt=19.2338, f=2, i=57) to 331 (rt=20.5385, f=2, i=60) [\\172.16.3.18\masslynx\2009.PRO\Data\20090915\_\_05\_qdda.raw] Score greater than 23 indicates homology Score greater than 30 indicates identity  ``` Score    Expect   Delta  Hit  Protein Peptide  26.7      0.12   -0.02   16   P04217 K.ELLVPR.S   8.6       7.4    0.08               R.ETSHPR.Q   8.2       8.3    0.06               R.IEDPPR.R   8.2       8.3    0.08               K.NQPDPR.L   8.2       8.3    0.01               R.NQVIPR.T   8.0       8.7    0.04               K.EIHTAR.F   8.0       8.7    0.04               R.ELHTAR.E   8.0       8.7   -0.02               R.ELPVLR.D   4.0        22    0.01               K.NIQVPR.E   4.0        22    0.01               K.QVQVPR.G ``` | |

|  |  |
| --- | --- |
| |  | | --- | | Top scoring peptide matches to query 839 78: Sum of 2 scans in range 371 (rt=22.3387, f=5, i=31) to 377 (rt=22.6374, f=5, i=32) [\\172.16.3.18\masslynx\2009.PRO\Data\20090917\_08\_qdda.raw] Score greater than 19 indicates homology Score greater than 30 indicates identity  ``` Score    Expect   Delta  Hit  Protein Peptide  18.9      0.69   -0.01   16   P04217 K.ELLVPR.S   5.8        14    0.05               K.EIHTAR.F   5.8        14    0.05               R.ELHTAR.E   5.8        14   -0.01               R.ELPVLR.D   4.6        19    0.06               R.IEDPPR.R   4.2        20    0.02               R.NQVIPR.T   2.1        34    0.06               M.EEPPVR.E ``` | |

|  |  |
| --- | --- |
| |  | | --- | | Top scoring peptide matches to query 840 66: Sum of 2 scans in range 373 (rt=22.5584, f=7, i=27) to 377 (rt=22.7575, f=7, i=28) [\\172.16.3.18\masslynx\2009.PRO\Data\20090917\_12\_qdda.raw] Score greater than 26 indicates homology Score greater than 30 indicates identity  ``` Score    Expect   Delta  Hit  Protein Peptide  34.3      0.02   -0.01   16   P04217 K.ELLVPR.S  10.9       4.4    0.06               R.IEDPPR.R   9.7       5.8    0.02               R.NQVIPR.T   9.5       6.1    0.02               K.NIQVPR.E   9.5       6.1    0.02               K.QVQVPR.G   8.5       7.7    0.06               M.EEPPVR.E   8.1       8.4    0.05               K.EIHTAR.F   8.1       8.4    0.05               R.ELHTAR.E   8.1       8.4   -0.01               R.ELPVLR.D   7.8       8.9    0.09               K.NQPDPR.L ``` | |

|  |  |
| --- | --- |
| |  | | --- | | Top scoring peptide matches to query 841 32: Sum of 9 scans in range 192 (rt=13.9909, f=4, i=11) to 220 (rt=15.3179, f=3, i=24) [\\172.16.3.18\masslynx\2009.PRO\Data\20090930\_36\_qdda.raw] Score greater than 21 indicates homology Score greater than 30 indicates identity  ``` Score    Expect   Delta  Hit  Protein Peptide  18.8      0.72   -0.01   16   P04217 K.ELLVPR.S   7.2        10    0.05               K.EIHTAR.F   7.2        10    0.05               R.ELHTAR.E   5.3        16    0.07               R.IEDPPR.R   4.8        18    0.02               K.QVQVPR.G   4.5        19    0.02               R.NQVIPR.T   4.4        20   -0.01               R.ELPVLR.D ``` | |

|  |  |
| --- | --- |
| |  | | --- | | Top scoring peptide matches to query 842 26: Scan 178 (rt=13.2642, f=5, i=8) [\\172.16.3.18\masslynx\2009.PRO\Data\20090930\_41\_qdda.raw] Score greater than 20 indicates homology Score greater than 30 indicates identity  ``` Score    Expect   Delta  Hit  Protein Peptide  20.1      0.53   -0.01   16   P04217 K.ELLVPR.S   6.7        11    0.07               M.EEPPVR.E   5.4        15    0.02               K.NIQVPR.E   5.4        15    0.02               K.QVQVPR.G   3.6        23    0.09               R.GGGPGEPR.G   3.3        25    0.09               K.NQPDPR.L   2.3        32    0.06               K.EIHTAR.F   2.3        32    0.06               R.ELHTAR.E   2.3        32   -0.01               R.ELPVLR.D ``` | |

|  |  |
| --- | --- |
| |  | | --- | | Top scoring peptide matches to query 844 36: Sum of 2 scans in range 286 (rt=18.6438, f=5, i=21) to 292 (rt=18.9427, f=5, i=22) [\\172.16.3.18\masslynx\2009.PRO\Data\20090915\_33\_qdda.raw] Score greater than 20 indicates homology Score greater than 32 indicates identity  ``` Score    Expect   Delta  Hit  Protein Peptide  11.6       6.7   -0.06               K.YIYIR.S  11.6       6.7   -0.06   40   P51884 YLYLR   7.2        19   -0.06               K.YLIYR.R   7.2        19   -0.06               R.YLLYR.E   5.3        29    0.02               K.EFFER.K   5.3        29    0.05               R.FEMER.A   4.9        31   -0.02               YFLER   4.9        31    0.01               R.YMIER.T   4.9        31    0.02               R.YPYER.I   4.7        32   -0.05               R.VGPEGLR.G ``` | |

|  |  |
| --- | --- |
| |  | | --- | | Top scoring peptide matches to query 846 44: Sum of 5 scans in range 344 (rt=21.418, f=4, i=34) to 363 (rt=22.3505, f=5, i=42) [\\172.16.3.18\masslynx\2009.PRO\Data\20090930\_16\_qdda.raw] Score greater than 17 indicates homology Score greater than 32 indicates identity  ``` Score    Expect   Delta  Hit  Protein Peptide   9.1        12    0.00               K.YIYIR.S   9.1        12    0.00   40   P51884 YLYLR   3.8        41    0.07               R.EMYLR.L   3.6        42    0.00               K.YYLIR.D   2.3        57    0.00               K.YLIYR.R   2.3        57    0.00               R.YLLYR.E   1.9        62    0.07               R.YMELR.G ``` | |

|  |  |
| --- | --- |
| |  | | --- | | Top scoring peptide matches to query 852 44: Sum of 6 scans in range 253 (rt=16.9994, f=4, i=24) to 300 (rt=19.3055, f=7, i=27) [\\172.16.3.18\masslynx\2009.PRO\Data\20090917\_28\_qdda.raw] Score greater than 26 indicates homology Score greater than 28 indicates identity  ``` Score    Expect   Delta  Hit  Protein Peptide  15.7      0.97   -0.03    4   P04114 LVTELR  12.5         2    0.01               R.RRNER.L  11.7       2.5   -0.03               K.ITDILR.T  11.7       2.5   -0.03               LSELLR  10.9       2.9    0.01               LAEELR  10.9       2.9    0.01               LEAELR  10.9       2.9   -0.03               R.LISELR.K  10.9       2.9   -0.03               R.LLSELR.N   9.7       3.9   -0.00               K.IGSNALR.M   9.7       3.9   -0.03               K.ILESIR.Q ``` | |

|  |  |
| --- | --- |
| |  | | --- | | Top scoring peptide matches to query 853 32: Sum of 4 scans in range 190 (rt=13.8692, f=6, i=10) to 213 (rt=15.0008, f=4, i=17) [\\172.16.3.18\masslynx\2009.PRO\Data\20090917\_32\_qdda.raw] Score greater than 27 indicates homology Score greater than 28 indicates identity  ``` Score    Expect   Delta  Hit  Protein Peptide  14.9       1.2   -0.02    4   P04114 LVTELR  14.0       1.5    0.02               LAEELR  11.6       2.5   -0.02               K.ITDILR.T  11.6       2.5   -0.02               LSELLR  10.0       3.7    0.04               R.LVNGDGR.C  10.0       3.7    0.04               R.LVNGGDR.C   9.7       3.9    0.00               K.IGSNALR.M   9.7       3.9   -0.02               K.ILESIR.Q   9.7       3.9   -0.02               R.LDLTLR.A   9.7       3.9    0.02               LEAELR ``` | |

|  |  |
| --- | --- |
| |  | | --- | | Top scoring peptide matches to query 854 52: Sum of 4 scans in range 312 (rt=19.7048, f=3, i=43) to 334 (rt=20.7868, f=4, i=28) [\\172.16.3.18\masslynx\2009.PRO\Data\20090930\_26\_qdda.raw] Score greater than 28 indicates identity  ``` Score    Expect   Delta  Hit  Protein Peptide  16.4      0.83   -0.01    4   P04114 LVTELR  15.0       1.1    0.02               LAEELR  14.7       1.2    0.01               R.VNQTLR.I  13.7       1.5    0.05               R.LVNGDGR.C  13.7       1.5    0.05               R.LVNGGDR.C  13.3       1.7   -0.01               K.ITDILR.T  13.3       1.7   -0.01               LSELLR  12.3       2.2    0.02               ALEELR  11.2       2.8    0.04               R.IGRNDR.L  11.2       2.8    0.00               R.IRGAGTR.E ``` | |

|  |  |
| --- | --- |
| |  | | --- | | Top scoring peptide matches to query 855 30: Sum of 6 scans in range 259 (rt=17.0208, f=4, i=13) to 292 (rt=18.6242, f=2, i=53) [\\172.16.3.18\masslynx\2009.PRO\Data\20090930\_21\_qdda.raw] Score greater than 28 indicates identity  ``` Score    Expect   Delta  Hit  Protein Peptide  18.1      0.56   -0.00    4   P04114 LVTELR  16.8      0.77   -0.00               K.ITDILR.T  16.8      0.77   -0.00               LSELLR  14.2       1.4    0.02               K.IGSNALR.M  14.2       1.4   -0.00               K.ILESIR.Q  14.2       1.4    0.03               LAEELR  14.2       1.4   -0.00               R.LDLTLR.A  14.2       1.4    0.03               LEAELR  14.2       1.4    0.03               LEEALR  14.2       1.4   -0.00               R.LIDTLR.M ``` | |

|  |  |
| --- | --- |
| |  | | --- | | Top scoring peptide matches to query 856 40: Sum of 4 scans in range 274 (rt=17.9205, f=4, i=29) to 310 (rt=19.6733, f=4, i=32) [\\172.16.3.18\masslynx\2009.PRO\Data\20090930\_31\_qdda.raw] Score greater than 28 indicates identity  ``` Score    Expect   Delta  Hit  Protein Peptide  18.2      0.55    0.06               R.LVNGDGR.C  18.2      0.55    0.06               R.LVNGGDR.C  18.2      0.55   -0.00    4   P04114 LVTELR  14.4       1.3    0.02               R.VNQTLR.I  14.2       1.4    0.05               R.IGRNDR.L  14.2       1.4    0.02               K.IGSNALR.M  14.2       1.4   -0.00               K.ILESIR.Q  14.2       1.4    0.01               R.IRGAGTR.E  14.2       1.4   -0.00               K.ITDILR.T  14.2       1.4    0.03               LAEELR ``` | |

|  |  |
| --- | --- |
| |  | | --- | | Top scoring peptide matches to query 857 41: Sum of 3 scans in range 321 (rt=20.0738, f=4, i=20) to 347 (rt=21.3418, f=5, i=22) [\\172.16.3.18\masslynx\2009.PRO\Data\20090930\_36\_qdda.raw] Score greater than 28 indicates identity  ``` Score    Expect   Delta  Hit  Protein Peptide  16.5       0.8    0.00    4   P04114 LVTELR  16.4      0.84    0.06               R.LVNGDGR.C  16.4      0.84    0.06               R.LVNGGDR.C  14.1       1.4    0.04               LAEELR  13.4       1.7    0.03               R.VNQTLR.I  13.0       1.8    0.02               K.LAQSRR.T  13.0       1.8    0.03               K.IGSNALR.M  13.0       1.8    0.00               K.ILESIR.Q  13.0       1.8    0.00               K.ITDILR.T  13.0       1.8    0.00               R.LDLTLR.A ``` | |

|  |  |
| --- | --- |
| |  | | --- | | Top scoring peptide matches to query 915 46: Sum of 2 scans in range 282 (rt=18.255, f=5, i=22) to 291 (rt=18.6899, f=5, i=23) [\\172.16.3.18\masslynx\2009.PRO\Data\20090915\_17\_qdda.raw] Score greater than 21 indicates homology Score greater than 29 indicates identity  ``` Score    Expect   Delta  Hit  Protein Peptide  14.8       1.6   -0.05    4   P04114 K.AAIQALR.K  14.8       1.6   -0.05               R.AALQALR.R   7.5       8.3   -0.05               R.AAQLAIR.V   7.5       8.3   -0.06               M.AAVRGLR.V   7.4       8.5   -0.06               K.ANLRIR.F   7.3       8.7    0.04               R.AAMFFR.R   7.3       8.8   -0.07               AARLRR   5.4        14   -0.02               R.AAATRPR.Q   5.2        14    0.06               R.AEGYFR.K   5.2        14    0.02               K.AFTTFR.R ``` | |

|  |  |
| --- | --- |
| |  | | --- | | Top scoring peptide matches to query 916 29: Sum of 7 scans in range 203 (rt=14.4271, f=4, i=15) to 259 (rt=17.1362, f=6, i=22) [\\172.16.3.18\masslynx\2009.PRO\Data\20090915\_17\_qdda.raw] Score greater than 29 indicates identity  ``` Score    Expect   Delta  Hit  Protein Peptide  30.1     0.046   -0.04    4   P04114 K.AAIQALR.K  30.1     0.046   -0.04               R.AALQALR.R  18.9      0.61   -0.04               R.AAQLAIR.V  10.9       3.8   -0.06               M.AAVRGLR.V   8.7       6.3   -0.07               R.ARRALR.R   5.8        12   -0.04               K.AAALIQR.W   5.8        12   -0.02               R.AAATRPR.Q   5.8        12    0.04               R.AAMFFR.R   5.8        12   -0.07               AARLRR   5.8        12   -0.06               R.AAVLGRR.A ``` | |

|  |  |
| --- | --- |
| |  | | --- | | Top scoring peptide matches to query 917 56: Scan 348 (rt=21.3207, f=5, i=21) [\\172.16.3.18\masslynx\2009.PRO\Data\20090916\_36\_qdda.raw] Score greater than 27 indicates homology Score greater than 29 indicates identity  ``` Score    Expect   Delta  Hit  Protein Peptide  22.4      0.27   -0.03    4   P04114 K.AAIQALR.K  22.4      0.27   -0.03               R.AALQALR.R  12.8       2.5   -0.03               R.AAQLAIR.V   8.3       6.9   -0.05               R.ARRALR.R   6.6        10   -0.01               M.APRSRR.R   6.6        10   -0.01               ARPRSR   6.0        12   -0.04               M.AAVRGLR.V   4.5        17   -0.04               R.INRAIR.Q   4.0        19   -0.01               ARRSPR   2.9        24   -0.04               R.NIRAIR.R ``` | |

|  |  |
| --- | --- |
| |  | | --- | | Top scoring peptide matches to query 929 29: Sum of 2 scans in range 144 (rt=11.6754, f=7, i=8) to 150 (rt=11.9741, f=7, i=9) [\\172.16.3.18\masslynx\2009.PRO\Data\20090916\_24\_qdda.raw] Score greater than 24 indicates homology Score greater than 29 indicates identity  ``` Score    Expect   Delta  Hit  Protein Peptide  28.2     0.069   -0.06   26   Q14624 R.LCVDPR.H  10.3       4.3   -0.09               K.CITIPR.S  10.3       4.3   -0.07               R.DMTIPR.G  10.2       4.4   -0.07               K.TPYDPR.W   8.6       6.4   -0.14               R.LISYPR.Y   4.3        17   -0.11               R.LTFPDR.E   4.1        18   -0.09               R.TFMPPR.V   3.7        20   -0.03               K.GSGEQDR.L   3.7        20   -0.14               K.LYLSPR.I   3.7        20   -0.08               R.SRSAGDR.W ``` | |

|  |  |
| --- | --- |
| |  | | --- | | Top scoring peptide matches to query 930 51: Sum of 2 scans in range 293 (rt=18.8974, f=4, i=27) to 299 (rt=19.1961, f=4, i=28) [\\172.16.3.18\masslynx\2009.PRO\Data\20090915\_21\_qdda.raw] Score greater than 24 indicates homology Score greater than 29 indicates identity  ``` Score    Expect   Delta  Hit  Protein Peptide  26.8     0.094   -0.05   26   Q14624 R.LCVDPR.H  10.1       4.5   -0.09               K.CITIPR.S  10.1       4.5   -0.07               R.DMTIPR.G  10.1       4.5   -0.07               K.TPYDPR.W   4.5        16   -0.09               R.TFMPPR.V   4.4        16   -0.10               R.LTFPDR.E   4.0        18   -0.07               -.MELSPR.S   4.0        18   -0.07               R.TMDIPR.S   4.0        18   -0.10               K.EFSIPR.A   4.0        18   -0.09               K.GGQPHPR.H ``` | |

|  |  |
| --- | --- |
| |  | | --- | | Top scoring peptide matches to query 931 33: Sum of 2 scans in range 153 (rt=12.1121, f=7, i=9) to 159 (rt=12.4108, f=7, i=10) [\\172.16.3.18\masslynx\2009.PRO\Data\20090916\_28\_qdda.raw] Score greater than 25 indicates homology Score greater than 29 indicates identity  ``` Score    Expect   Delta  Hit  Protein Peptide  19.5      0.52   -0.05   26   Q14624 R.LCVDPR.H  11.4       3.3   -0.13               R.LISYPR.Y  11.4       3.3   -0.13               K.LYLSPR.I  11.1       3.6   -0.06               K.TPYDPR.W   7.8       7.6   -0.06               R.DMTIPR.G   7.0         9   -0.08               K.CITIPR.S   4.8        15   -0.07               R.SRSAGDR.W   4.8        15   -0.04               R.WGSQDR.G   4.7        15   -0.10               R.LTFPDR.E   4.6        16   -0.08               R.TFMPPR.V ``` | |

|  |  |
| --- | --- |
| |  | | --- | | Top scoring peptide matches to query 932 65: Sum of 2 scans in range 361 (rt=22.08, f=6, i=37) to 367 (rt=22.3787, f=6, i=38) [\\172.16.3.18\masslynx\2009.PRO\Data\20090915\_17\_qdda.raw] Score greater than 22 indicates homology Score greater than 29 indicates identity  ``` Score    Expect   Delta  Hit  Protein Peptide  16.3       1.1   -0.04   26   Q14624 R.LCVDPR.H   8.9       5.8   -0.08               K.CITIPR.S   8.9       5.8   -0.06               R.DMTIPR.G   5.2        14   -0.06               K.TPYDPR.W   2.9        23   -0.02               K.GSGEQDR.L   2.9        23   -0.13               R.LISYPR.Y   2.9        23   -0.13               K.LYLSPR.I   2.9        23   -0.06               R.SRSAGDR.W   2.9        23   -0.03               R.WGSQDR.G   2.8        24   -0.08               K.GGQPHPR.H ``` | |

|  |  |
| --- | --- |
| |  | | --- | | Top scoring peptide matches to query 933 49: Sum of 4 scans in range 264 (rt=17.1306, f=3, i=22) to 275 (rt=17.651, f=3, i=24) [\\172.16.3.18\masslynx\2009.PRO\Data\20090915\_25\_qdda.raw] Score greater than 25 indicates homology Score greater than 29 indicates identity  ``` Score    Expect   Delta  Hit  Protein Peptide  19.7      0.48   -0.04   26   Q14624 R.LCVDPR.H  11.8         3   -0.13               R.LISYPR.Y  11.8         3   -0.13               K.LYLSPR.I  11.3       3.4   -0.08               K.CITIPR.S  11.3       3.4   -0.06               R.DMTIPR.G   6.5        10   -0.05               K.TPYDPR.W   4.7        16   -0.13               R.YSLLPR.R   4.0        18   -0.01               K.GSGEQDR.L   4.0        18   -0.06               R.SRSAGDR.W   4.0        18   -0.03               R.WGSQDR.G ``` | |

|  |  |
| --- | --- |
| |  | | --- | | Top scoring peptide matches to query 934 53: Scan 281 (rt=17.9296, f=3, i=25) [\\172.16.3.18\masslynx\2009.PRO\Data\20090915\_25\_qdda.raw] Score greater than 26 indicates homology Score greater than 29 indicates identity  ``` Score    Expect   Delta  Hit  Protein Peptide  16.7      0.98   -0.06               R.DMTIPR.G  12.5       2.5   -0.04   26   Q14624 R.LCVDPR.H  12.5       2.5   -0.13               R.LISYPR.Y  12.5       2.5   -0.13               K.LYLSPR.I  10.4       4.2   -0.06               K.DQSSRR.V   7.6       7.9   -0.05               K.DSGSVQR.L   6.6        10   -0.08               -.MAGARSR.D   4.0        18   -0.01               K.GSGEQDR.L   4.0        18   -0.06               R.SRSAGDR.W   4.0        18   -0.03               R.WGSQDR.G ``` | |

|  |  |
| --- | --- |
| |  | | --- | | Top scoring peptide matches to query 935 45: Sum of 6 scans in range 246 (rt=16.289, f=4, i=19) to 258 (rt=16.8521, f=3, i=21) [\\172.16.3.18\masslynx\2009.PRO\Data\20090915\_25\_qdda.raw] Score greater than 29 indicates identity  ``` Score    Expect   Delta  Hit  Protein Peptide  25.6      0.12   -0.04   26   Q14624 R.LCVDPR.H  16.5         1   -0.12               R.LISYPR.Y  13.8       1.9   -0.07               K.CITIPR.S  13.8       1.9   -0.05               R.DMTIPR.G  10.1       4.4   -0.12               K.LYLSPR.I   8.9       5.9   -0.09               K.EFSIPR.A   8.9       5.9   -0.07               K.GGQPHPR.H   8.9       5.9   -0.05               -.MELSPR.S   8.9       5.9   -0.04               R.SDHHPR.T   8.9       5.9   -0.07               R.TFMPPR.V ``` | |

|  |  |
| --- | --- |
| |  | | --- | | Top scoring peptide matches to query 936 33: Sum of 2 scans in range 172 (rt=13.0651, f=7, i=13) to 178 (rt=13.3638, f=7, i=14) [\\172.16.3.18\masslynx\2009.PRO\Data\20090916\_20\_qdda.raw] Score greater than 13 indicates homology Score greater than 29 indicates identity  ``` Score    Expect   Delta  Hit  Protein Peptide   2.7        25   -0.07               R.QLEMIV.-   2.6        25   -0.03   26   Q14624 R.LCVDPR.H   0.0        45   -0.03               R.SDHHPR.T ``` | |

|  |  |
| --- | --- |
| |  | | --- | | Top scoring peptide matches to query 937 43: Sum of 11 scans in range 250 (rt=16.7264, f=3, i=35) to 295 (rt=18.9125, f=5, i=22) [\\172.16.3.18\masslynx\2009.PRO\Data\20090917\_24\_qdda.raw] Score greater than 26 indicates homology Score greater than 29 indicates identity  ``` Score    Expect   Delta  Hit  Protein Peptide  28.7     0.062   -0.03   26   Q14624 R.LCVDPR.H  11.6       3.1   -0.11               R.LISYPR.Y  11.0       3.6   -0.11               K.LYLSPR.I  10.8       3.8   -0.06               K.CITIPR.S  10.8       3.8   -0.04               R.DMTIPR.G  10.7       3.9   -0.04               K.TPYDPR.W   4.7        15   -0.11               R.YSLLPR.R   4.7        15   -0.08               R.LTFPDR.E   4.6        16   -0.06               R.TFMPPR.V   4.1        18   -0.00               K.GSGEQDR.L ``` | |

|  |  |
| --- | --- |
| |  | | --- | | Top scoring peptide matches to query 938 56: Sum of 4 scans in range 301 (rt=19.2994, f=4, i=33) to 319 (rt=20.1825, f=3, i=29) [\\172.16.3.18\masslynx\2009.PRO\Data\20090916\_32\_qdda.raw] Score greater than 26 indicates homology Score greater than 29 indicates identity  ``` Score    Expect   Delta  Hit  Protein Peptide  31.1     0.035   -0.03   26   Q14624 R.LCVDPR.H  11.8         3   -0.06               K.CITIPR.S  11.8         3   -0.04               R.DMTIPR.G  11.7       3.1   -0.04               K.TPYDPR.W   5.1        14   -0.08               R.LTFPDR.E   5.0        14   -0.06               R.TFMPPR.V   4.4        16   -0.00               K.GSGEQDR.L   4.4        16   -0.11               R.LISYPR.Y   4.4        16   -0.11               K.LYLSPR.I   4.4        16   -0.05               R.SRSAGDR.W ``` | |

|  |  |
| --- | --- |
| |  | | --- | | Top scoring peptide matches to query 939 49: Sum of 5 scans in range 300 (rt=19.1207, f=5, i=25) to 323 (rt=20.2452, f=7, i=31) [\\172.16.3.18\masslynx\2009.PRO\Data\20090930\_26\_qdda.raw] Score greater than 27 indicates homology Score greater than 30 indicates identity  ``` Score    Expect   Delta  Hit  Protein Peptide  31.7     0.042   -0.02   26   Q14624 R.LCVDPR.H  12.6       3.4   -0.11               R.LISYPR.Y  12.6       3.4   -0.11               K.LYLSPR.I  12.4       3.5   -0.06               K.CITIPR.S  12.4       3.5   -0.04               R.DMTIPR.G  12.3       3.6   -0.03               K.TPYDPR.W   9.2       7.3   -0.11               R.YSLLPR.R   9.2       7.4   -0.07               R.LTFPDR.E   9.1       7.5   -0.05               R.TFMPPR.V   4.7        21    0.01               K.GSGEQDR.L ``` | |

|  |  |
| --- | --- |
| |  | | --- | | Top scoring peptide matches to query 940 44: Sum of 7 scans in range 273 (rt=17.8855, f=3, i=33) to 295 (rt=18.9531, f=4, i=36) [\\172.16.3.18\masslynx\2009.PRO\Data\20090917\_20\_qdda.raw] Score greater than 25 indicates homology Score greater than 30 indicates identity  ``` Score    Expect   Delta  Hit  Protein Peptide  28.6     0.085   -0.02   26   Q14624 R.LCVDPR.H  10.9       4.9   -0.10               R.LISYPR.Y  10.9       4.9   -0.10               K.LYLSPR.I  10.7       5.2   -0.05               K.CITIPR.S  10.7       5.2   -0.03               R.DMTIPR.G  10.6       5.3   -0.03               K.TPYDPR.W   6.3        14   -0.04               R.SRSAGDR.W   4.7        21   -0.07               R.LTFPDR.E   4.6        21   -0.10               R.YSLLPR.R   4.5        21   -0.05               R.TFMPPR.V ``` | |

|  |  |
| --- | --- |
| |  | | --- | | Top scoring peptide matches to query 941 31: Sum of 6 scans in range 260 (rt=17.0706, f=5, i=21) to 277 (rt=17.8965, f=7, i=24) [\\172.16.3.18\masslynx\2009.PRO\Data\20090930\_21\_qdda.raw] Score greater than 29 indicates homology Score greater than 30 indicates identity  ``` Score    Expect   Delta  Hit  Protein Peptide  34.8      0.02   -0.01   26   Q14624 R.LCVDPR.H  13.9       2.5   -0.10               R.LISYPR.Y  13.9       2.5   -0.10               K.LYLSPR.I  13.6       2.7   -0.04               K.CITIPR.S  13.6       2.7   -0.03               R.DMTIPR.G  13.6       2.7   -0.02               K.TPYDPR.W  10.1         6   -0.06               R.LTFPDR.E  10.1         6   -0.10               R.YSLLPR.R  10.0       6.1   -0.04               R.TFMPPR.V   5.9        16   -0.06               K.LEMALR.E ``` | |

|  |  |
| --- | --- |
| |  | | --- | | Top scoring peptide matches to query 942 39: Sum of 8 scans in range 267 (rt=17.5924, f=4, i=26) to 292 (rt=18.7962, f=7, i=19) [\\172.16.3.18\masslynx\2009.PRO\Data\20090930\_31\_qdda.raw] Score greater than 26 indicates homology Score greater than 30 indicates identity  ``` Score    Expect   Delta  Hit  Protein Peptide  14.8         2   -0.02               R.DMTIPR.G  12.2       3.7   -0.01   26   Q14624 R.LCVDPR.H  11.3       4.5   -0.03               K.DQSSRR.V  10.9       4.9   -0.09               R.LISYPR.Y  10.9       4.9   -0.09               K.LYLSPR.I   6.2        15   -0.04               K.CITIPR.S   4.4        22   -0.03               R.SRSAGDR.W   4.4        22    0.00               R.WGSQDR.G   4.0        24    0.02               R.DESGANR.D   3.6        27    0.02               K.GSGEQDR.L ``` | |

|  |  |
| --- | --- |
| |  | | --- | | Top scoring peptide matches to query 943 72: Sum of 3 scans in range 374 (rt=22.653, f=6, i=23) to 378 (rt=22.8449, f=6, i=25) [\\172.16.3.18\masslynx\2009.PRO\Data\20090916\_40\_qdda.raw] Score greater than 25 indicates homology Score greater than 30 indicates identity  ``` Score    Expect   Delta  Hit  Protein Peptide  28.5     0.087   -0.01   26   Q14624 R.LCVDPR.H  10.5       5.5   -0.04               K.CITIPR.S  10.5       5.5   -0.02               R.DMTIPR.G  10.3       5.7   -0.02               K.TPYDPR.W   9.4       7.1   -0.09               R.LISYPR.Y   9.4       7.1   -0.09               K.LYLSPR.I   4.0        25   -0.06               R.LTFPDR.E   3.9        25   -0.04               R.TFMPPR.V   3.5        27   -0.09               R.YSLLPR.R   3.3        28   -0.06               K.EFSIPR.A ``` | |

|  |  |
| --- | --- |
| |  | | --- | | Top scoring peptide matches to query 944 36: Sum of 9 scans in range 296 (rt=18.8758, f=4, i=15) to 316 (rt=19.8307, f=5, i=18) [\\172.16.3.18\masslynx\2009.PRO\Data\20090930\_36\_qdda.raw] Score greater than 25 indicates homology Score greater than 30 indicates identity  ``` Score    Expect   Delta  Hit  Protein Peptide  19.0      0.76   -0.00   26   Q14624 R.LCVDPR.H  10.8       5.1   -0.09               R.LISYPR.Y  10.8       5.1   -0.09               K.LYLSPR.I   6.5        14   -0.04               K.CITIPR.S   6.5        14   -0.02               R.DMTIPR.G   6.3        14   -0.02               K.TPYDPR.W   3.3        29   -0.05               K.EFSIPR.A   3.3        29   -0.04               K.GGQPHPR.H   3.3        29   -0.02               -.MELSPR.S   3.3        29   -0.00               R.SDHHPR.T ``` | |

|  |  |
| --- | --- |
| |  | | --- | | Top scoring peptide matches to query 945 46: Scan 313 (rt=19.6805, f=5, i=25) [\\172.16.3.18\masslynx\2009.PRO\Data\20090917\_16\_qdda.raw] Score greater than 14 indicates homology Score greater than 30 indicates identity  ``` Score    Expect   Delta  Hit  Protein Peptide   5.3        18   -0.04               K.FAHAFR.N   5.3        18    0.02               K.MAAHMR.M   1.6        42   -0.02               R.SRSAGDR.W   1.6        42   -0.04               -.MAAQRR.S   1.5        43   -0.00   26   Q14624 R.LCVDPR.H   1.1        47   -0.02               R.DMTIPR.G   0.9        50    0.02               K.GSGEQDR.L   0.9        50   -0.09               R.LISYPR.Y   0.9        50   -0.09               K.LYLSPR.I   0.9        50    0.01               R.WGSQDR.G ``` | |

|  |  |
| --- | --- |
| |  | | --- | | Top scoring peptide matches to query 950 6: Sum of 2 scans in range 106 (rt=9.75775, f=4, i=2) to 112 (rt=10.0564, f=4, i=3) [\\172.16.3.18\masslynx\2009.PRO\Data\20090917\_20\_qdda.raw] Score greater than 20 indicates homology Score greater than 30 indicates identity  ``` Score    Expect   Delta  Hit  Protein Peptide  22.7       0.3   -0.05   16   P04217 R.SSTSPDR.I   6.1        14   -0.11               K.SMGAIVR.G   3.8        24   -0.11               R.SGTVMVR.I   3.7        24   -0.12               K.SVLSTSR.N   3.7        24   -0.10               K.SVPYQR.T   3.7        24   -0.06               K.SSERDR.L   3.2        27   -0.08               R.RAAMER.Q   3.1        28   -0.07               K.SWVDSR.D   0.8        47   -0.10               R.SQPVYR.A   0.8        47   -0.12               R.RTSVMR.N ``` | |

|  |  |
| --- | --- |
| |  | | --- | | Top scoring peptide matches to query 951 8: Sum of 3 scans in range 111 (rt=9.94992, f=3, i=5) to 113 (rt=10.035, f=3, i=7) [\\172.16.3.18\masslynx\2009.PRO\Data\20090915\_13\_qdda.raw] Score greater than 24 indicates homology Score greater than 30 indicates identity  ``` Score    Expect   Delta  Hit  Protein Peptide  13.4       2.6   -0.10               K.LQADFR.S  13.3       2.7   -0.10               K.QLADFR.E  10.5         5   -0.07               R.SPGEGFR.L   5.3        17   -0.09               R.LQACLR.E   5.3        17   -0.10               R.EQGIFR.V   5.3        17   -0.10               K.QEGIFR.V   5.3        17   -0.12               K.WAGIFR.N   4.6        19   -0.05   16   P04217 R.SSTSPDR.I   4.5        20   -0.08               K.AVAWMR.A   4.5        20   -0.10               K.AVEQFR.R ``` | |

|  |  |
| --- | --- |
| |  | | --- | | Top scoring peptide matches to query 952 3: Sum of 3 scans in range 100 (rt=9.413, f=2, i=20) to 105 (rt=9.65468, f=2, i=22) [\\172.16.3.18\masslynx\2009.PRO\Data\20090915\_17\_qdda.raw] Score greater than 21 indicates homology Score greater than 31 indicates identity  ``` Score    Expect   Delta  Hit  Protein Peptide   9.9       6.6   -0.05   16   P04217 R.SSTSPDR.I   8.0        10   -0.05               K.ADSVSDR.L   7.4        12   -0.09               K.TRDTTR.M   6.2        16   -0.06               M.EGAMAVR.V   6.2        16   -0.11               K.WAGIFR.N   5.6        18   -0.04               K.WWSDR.L   4.9        21   -0.06               K.ALMENR.R   4.9        21   -0.11               K.AMLRSR.I   4.4        24   -0.10               K.SMGAIVR.G   4.4        24   -0.06               K.SWVDSR.D ``` | |

|  |  |
| --- | --- |
| |  | | --- | | Top scoring peptide matches to query 953 16: Sum of 2 scans in range 100 (rt=9.51228, f=2, i=24) to 106 (rt=9.81097, f=2, i=25) [\\172.16.3.18\masslynx\2009.PRO\Data\20090916\_32\_qdda.raw] Score greater than 27 indicates homology Score greater than 31 indicates identity  ``` Score    Expect   Delta  Hit  Protein Peptide  18.7      0.88   -0.04   16   P04217 R.SSTSPDR.I  13.5       2.9   -0.04               K.EQSETR.K  13.2       3.2   -0.03               R.RGMDDR.G   8.9       8.4   -0.06               R.NTEVMR.E   6.8        14   -0.10               K.SMGAIVR.G   6.2        16   -0.06               R.SMLQDR.E   5.6        18   -0.08               R.SSASELR.R   5.2        20   -0.04               R.SSESSPR.S   5.2        20   -0.04               R.SSSEPSR.V   5.1        20   -0.11               R.RTSVMR.N ``` | |

|  |  |
| --- | --- |
| |  | | --- | | Top scoring peptide matches to query 956 7: Sum of 2 scans in range 116 (rt=10.2736, f=3, i=8) to 122 (rt=10.5723, f=3, i=9) [\\172.16.3.18\masslynx\2009.PRO\Data\20090930\_36\_qdda.raw] Score greater than 23 indicates homology Score greater than 31 indicates identity  ``` Score    Expect   Delta  Hit  Protein Peptide  21.5      0.46   -0.01   16   P04217 R.SSTSPDR.I   8.8       8.7   -0.01               K.EQSETR.K   8.8       8.7   -0.08               R.RTSVMR.N   7.3        12   -0.01               R.RGMDDR.G   5.8        17   -0.07               K.SMGAIVR.G   4.6        23   -0.03               K.QGLEMR.I   4.5        23   -0.07               R.SGTVMVR.I   0.5        58   -0.08               R.SAMRLR.G   0.5        58   -0.02               K.SDDRTR.V   0.5        58    0.01               R.SDGWER.A ``` | |

|  |  |
| --- | --- |
| |  | | --- | | Top scoring peptide matches to query 957 10: Sum of 2 scans in range 115 (rt=10.2239, f=2, i=40) to 121 (rt=10.5225, f=2, i=41) [\\172.16.3.18\masslynx\2009.PRO\Data\20090930\_31\_qdda.raw] Score greater than 27 indicates homology Score greater than 31 indicates identity  ``` Score    Expect   Delta  Hit  Protein Peptide  20.9      0.53   -0.01   16   P04217 R.SSTSPDR.I  12.8       3.4   -0.08               R.RTSVMR.N  11.5       4.6   -0.00               R.RGMDDR.G   7.7        11   -0.07               K.SMGAIVR.G   6.5        15   -0.02               K.SSERDR.L   6.3        15   -0.04               R.RTMADR.K   5.8        17   -0.05               R.SSALDTR.R   5.8        17   -0.05               R.SSASELR.R   5.8        17   -0.01               R.SSESSPR.S   5.8        17   -0.08               K.SSLRMR.T ``` | |

|  |  |
| --- | --- |
| |  | | --- | | Top scoring peptide matches to query 958 8: Sum of 2 scans in range 120 (rt=10.4366, f=4, i=1) to 126 (rt=10.7353, f=4, i=2) [\\172.16.3.18\masslynx\2009.PRO\Data\20090930\_41\_qdda.raw] Score greater than 24 indicates homology Score greater than 31 indicates identity  ``` Score    Expect   Delta  Hit  Protein Peptide  15.4       1.9   -0.01   16   P04217 R.SSTSPDR.I  11.0       5.2   -0.07               K.SMGAIVR.G   7.5        12   -0.04               R.RAAMER.Q   5.5        19   -0.07               R.SGTVMVR.I   5.4        19   -0.01               K.EQSETR.K   5.2        20   -0.00               R.RGMDDR.G   4.7        22   -0.08               R.RTSVMR.N   4.6        23   -0.03               K.SWVDSR.D   1.4        47   -0.02               K.SDDRTR.V   1.4        47    0.01               R.SDGWER.A ``` | |

|  |  |
| --- | --- |
| |  | | --- | | Top scoring peptide matches to query 959 8: Scan 111 (rt=9.95725, f=3, i=4) [\\172.16.3.18\masslynx\2009.PRO\Data\20090917\_12\_qdda.raw] Score greater than 14 indicates homology Score greater than 31 indicates identity  ``` Score    Expect   Delta  Hit  Protein Peptide   6.0        17   -0.06               K.SMGAIVR.G   6.0        17   -0.00   16   P04217 R.SSTSPDR.I   1.3        49   -0.05               R.SQPVYR.A   0.4        59   -0.07               R.SAMRLR.G   0.4        59   -0.01               K.SDDRTR.V   0.4        59    0.02               R.SDGWER.A   0.4        59   -0.02               K.SDPFAGR.N   0.4        59    0.02               R.SEGGPMR.H   0.4        59   -0.04               K.SESAISR.H   0.4        59   -0.01               R.SESRDR.S ``` | |

|  |  |
| --- | --- |
| |  | | --- | | Top scoring peptide matches to query 972 155: Scan 642 (rt=35.7223, f=4, i=79) [\\172.16.3.18\masslynx\2009.PRO\Data\20090916\_40\_qdda.raw] Score greater than 14 indicates homology Score greater than 28 indicates identity  ``` Score    Expect   Delta  Hit  Protein Peptide  18.0      0.58   -0.00   33   Patient27169 ALYCEL   0.1        37   -0.09               K.AIHNFR.S   0.1        37   -0.15               R.AILRER.I   0.1        37   -0.15               K.AIRIER.V   0.1        37   -0.13               R.ALDLLGR.F   0.1        37   -0.15               K.ALLRER.K   0.1        37   -0.15               K.ALREIR.Y ``` | |

|  |  |
| --- | --- |
| |  | | --- | | Top scoring peptide matches to query 973 152: Scan 635 (rt=35.2526, f=5, i=57) [\\172.16.3.18\masslynx\2009.PRO\Data\20090916\_44\_qdda.raw] Score greater than 23 indicates homology Score greater than 28 indicates identity  ``` Score    Expect   Delta  Hit  Protein Peptide  10.3       3.5   -0.00   33   Patient27169 ALYCEL ``` | |

|  |  |
| --- | --- |
| |  | | --- | | Top scoring peptide matches to query 974 166: Scan 657 (rt=36.401, f=7, i=59) [\\172.16.3.18\masslynx\2009.PRO\Data\20090917\_12\_qdda.raw] Score greater than 21 indicates homology Score greater than 28 indicates identity  ``` Score    Expect   Delta  Hit  Protein Peptide   8.6       5.1    0.01   33   Patient27169 ALYCEL ``` | |

|  |  |
| --- | --- |
| |  | | --- | | Top scoring peptide matches to query 980 31: Sum of 23 scans in range 235 (rt=16.1275, f=2, i=51) to 299 (rt=19.2915, f=2, i=62) [\\172.16.3.18\masslynx\2009.PRO\Data\20090915\_33\_qdda.raw] Score greater than 28 indicates identity  ``` Score    Expect   Delta  Hit  Protein Peptide  24.0      0.15   -0.16               IDISRR  24.0      0.15   -0.11   56   Q9HC10 IDLENR  15.2       1.1   -0.16               K.DLIRSR.F  15.2       1.1   -0.16               R.DLISRR.I  15.2       1.1   -0.11               K.DLLQDR.H  15.2       1.1   -0.16               R.DLLRSR.G  15.2       1.1   -0.11               R.IDELNR.E  15.2       1.1   -0.11               R.IDQLDR.E  15.2       1.1   -0.16               K.IDRLSR.I  15.2       1.1   -0.16               R.IDSLRR.T ``` | |

|  |  |
| --- | --- |
| |  | | --- | | Top scoring peptide matches to query 981 52: Sum of 10 scans in range 325 (rt=20.4902, f=2, i=63) to 358 (rt=22.1198, f=4, i=40) [\\172.16.3.18\masslynx\2009.PRO\Data\20090917\_32\_qdda.raw] Score greater than 28 indicates identity  ``` Score    Expect   Delta  Hit  Protein Peptide  24.2      0.15   -0.16               IDISRR  24.2      0.15   -0.11   56   Q9HC10 IDLENR  15.4       1.1   -0.16               K.DLIRSR.F  15.4       1.1   -0.16               R.DLISRR.I  15.4       1.1   -0.11               K.DLLQDR.H  15.4       1.1   -0.16               R.DLLRSR.G  15.4       1.1   -0.11               R.IDELNR.E  15.4       1.1   -0.11               R.IDQLDR.E  15.4       1.1   -0.16               K.IDRLSR.I  15.4       1.1   -0.16               R.IDSLRR.T ``` | |

|  |  |
| --- | --- |
| |  | | --- | | Top scoring peptide matches to query 982 51: Sum of 4 scans in range 339 (rt=21.2404, f=2, i=66) to 356 (rt=22.0867, f=2, i=69) [\\172.16.3.18\masslynx\2009.PRO\Data\20090916\_20\_qdda.raw] Score greater than 28 indicates identity  ``` Score    Expect   Delta  Hit  Protein Peptide  24.1      0.15   -0.14               IDISRR  24.1      0.15   -0.09   56   Q9HC10 IDLENR  15.3       1.1   -0.14               K.DLIRSR.F  15.3       1.1   -0.14               R.DLISRR.I  15.3       1.1   -0.09               K.DLLQDR.H  15.3       1.1   -0.14               R.DLLRSR.G  15.3       1.1   -0.09               R.IDELNR.E  15.3       1.1   -0.09               R.IDQLDR.E  15.3       1.1   -0.14               K.IDRLSR.I  15.3       1.1   -0.14               R.IDSLRR.T ``` | |

|  |  |
| --- | --- |
| |  | | --- | | Top scoring peptide matches to query 983 69: Sum of 10 scans in range 406 (rt=24.3114, f=2, i=71) to 438 (rt=25.8912, f=5, i=42) [\\172.16.3.18\masslynx\2009.PRO\Data\20090930\_26\_qdda.raw] Score greater than 28 indicates identity  ``` Score    Expect   Delta  Hit  Protein Peptide  23.7      0.16   -0.14               IDISRR  23.7      0.16   -0.09   56   Q9HC10 IDLENR  14.9       1.2   -0.14               K.DLIRSR.F  14.9       1.2   -0.14               R.DLISRR.I  14.9       1.2   -0.09               K.DLLQDR.H  14.9       1.2   -0.14               R.DLLRSR.G  14.9       1.2   -0.09               R.IDELNR.E  14.9       1.2   -0.09               R.IDQLDR.E  14.9       1.2   -0.14               K.IDRLSR.I  14.9       1.2   -0.14               R.IDSLRR.T ``` | |

|  |  |
| --- | --- |
| |  | | --- | | Top scoring peptide matches to query 984 56: Sum of 6 scans in range 356 (rt=22.0538, f=2, i=79) to 373 (rt=22.9, f=2, i=82) [\\172.16.3.18\masslynx\2009.PRO\Data\20090917\_28\_qdda.raw] Score greater than 28 indicates identity  ``` Score    Expect   Delta  Hit  Protein Peptide  19.4      0.44   -0.08   56   Q9HC10 IDLENR  17.7      0.65   -0.13               IDISRR  13.0       1.9   -0.10               R.IIMNPR.L  11.6       2.6   -0.13               R.NPLLFR.C  10.9       3.1   -0.08               R.IDELNR.E  10.8       3.2   -0.08               K.DLLQDR.H  10.8       3.2   -0.08               R.VEIQDR.G  10.6       3.3   -0.15               R.IMRIAR.I  10.6       3.3   -0.08               R.IDQLDR.E  10.4       3.5   -0.08               LASSEPR ``` | |

|  |  |
| --- | --- |
| |  | | --- | | Top scoring peptide matches to query 985 69: Sum of 2 scans in range 375 (rt=22.9272, f=2, i=75) to 381 (rt=23.226, f=2, i=76) [\\172.16.3.18\masslynx\2009.PRO\Data\20090915\_21\_qdda.raw] Score greater than 28 indicates identity  ``` Score    Expect   Delta  Hit  Protein Peptide  24.1      0.15   -0.12               IDISRR  24.1      0.15   -0.07   56   Q9HC10 IDLENR  15.3       1.1   -0.12               K.DLIRSR.F  15.3       1.1   -0.12               R.DLISRR.I  15.3       1.1   -0.07               K.DLLQDR.H  15.3       1.1   -0.12               R.DLLRSR.G  15.3       1.1   -0.07               R.IDELNR.E  15.3       1.1   -0.07               R.IDQLDR.E  15.3       1.1   -0.12               K.IDRLSR.I  15.3       1.1   -0.12               R.IDSLRR.T ``` | |

|  |  |
| --- | --- |
| |  | | --- | | Top scoring peptide matches to query 986 65: Sum of 6 scans in range 391 (rt=23.6125, f=2, i=67) to 407 (rt=24.409, f=2, i=70) [\\172.16.3.18\masslynx\2009.PRO\Data\20090917\_24\_qdda.raw] Score greater than 28 indicates identity  ``` Score    Expect   Delta  Hit  Protein Peptide  26.9     0.077   -0.07   56   Q9HC10 IDLENR  23.9      0.16   -0.11               IDISRR  18.8       0.5   -0.09               R.IIMNPR.L  17.4      0.69   -0.07               K.DLLQDR.H  17.4      0.69   -0.07               R.IDELNR.E  17.4      0.69   -0.07               R.IDQLDR.E  17.4      0.69   -0.07               R.VEIQDR.G  15.0       1.2   -0.11               K.DLIRSR.F  15.0       1.2   -0.11               R.DLISRR.I  15.0       1.2   -0.11               R.DLLRSR.G ``` | |

|  |  |
| --- | --- |
| |  | | --- | | Top scoring peptide matches to query 987 32: Sum of 10 scans in range 283 (rt=18.244, f=3, i=29) to 332 (rt=20.6593, f=6, i=34) [\\172.16.3.18\masslynx\2009.PRO\Data\20090915\_29\_qdda.raw] Score greater than 28 indicates identity  ``` Score    Expect   Delta  Hit  Protein Peptide  24.2      0.15   -0.11               IDISRR  24.2      0.15   -0.07   56   Q9HC10 IDLENR  15.4       1.1   -0.11               K.DLIRSR.F  15.4       1.1   -0.11               R.DLISRR.I  15.4       1.1   -0.07               K.DLLQDR.H  15.4       1.1   -0.11               R.DLLRSR.G  15.4       1.1   -0.07               R.IDELNR.E  15.4       1.1   -0.07               R.IDQLDR.E  15.4       1.1   -0.11               K.IDRLSR.I  15.4       1.1   -0.11               R.IDSLRR.T ``` | |

|  |  |
| --- | --- |
| |  | | --- | | Top scoring peptide matches to query 988 56: Sum of 4 scans in range 349 (rt=21.6138, f=2, i=68) to 366 (rt=22.4601, f=2, i=71) [\\172.16.3.18\masslynx\2009.PRO\Data\20090916\_28\_qdda.raw] Score greater than 28 indicates identity  ``` Score    Expect   Delta  Hit  Protein Peptide  26.9     0.077   -0.06   56   Q9HC10 IDLENR  23.9      0.16   -0.11               IDISRR  18.8       0.5   -0.08               R.IIMNPR.L  17.4      0.69   -0.06               K.DLLQDR.H  17.4      0.69   -0.06               R.IDELNR.E  17.4      0.69   -0.06               R.IDQLDR.E  17.4      0.69   -0.06               R.VEIQDR.G  15.1       1.2   -0.11               K.DLIRSR.F  15.1       1.2   -0.11               R.DLISRR.I  15.1       1.2   -0.11               R.DLLRSR.G ``` | |

|  |  |
| --- | --- |
| |  | | --- | | Top scoring peptide matches to query 989 96: Sum of 5 scans in range 421 (rt=25.0815, f=3, i=56) to 435 (rt=25.764, f=3, i=60) [\\172.16.3.18\masslynx\2009.PRO\Data\20090915\_09\_qdda.raw] Score greater than 28 indicates identity  ``` Score    Expect   Delta  Hit  Protein Peptide  19.5      0.43   -0.05   56   Q9HC10 IDLENR  17.8      0.63   -0.10               IDISRR  13.0       1.9   -0.07               R.IIMNPR.L  11.6       2.6   -0.10               R.NPLLFR.C  10.9       3.1   -0.05               K.DLLQDR.H  10.9       3.1   -0.05               R.VEIQDR.G  10.7       3.3   -0.12               R.IMRIAR.I  10.6       3.3   -0.05               R.IDELNR.E  10.6       3.3   -0.05               R.IDQLDR.E  10.4       3.5   -0.05               LASSEPR ``` | |

|  |  |
| --- | --- |
| |  | | --- | | Top scoring peptide matches to query 990 34: Sum of 2 scans in range 303 (rt=19.4069, f=2, i=65) to 309 (rt=19.7056, f=2, i=66) [\\172.16.3.18\masslynx\2009.PRO\Data\20090915\_37\_qdda.raw] Score greater than 28 indicates identity  ``` Score    Expect   Delta  Hit  Protein Peptide  23.9      0.15   -0.09               IDISRR  23.9      0.15   -0.05   56   Q9HC10 IDLENR  15.1       1.2   -0.09               K.DLIRSR.F  15.1       1.2   -0.09               R.DLISRR.I  15.1       1.2   -0.05               K.DLLQDR.H  15.1       1.2   -0.09               R.DLLRSR.G  15.1       1.2   -0.05               R.IDELNR.E  15.1       1.2   -0.05               R.IDQLDR.E  15.1       1.2   -0.09               K.IDRLSR.I  15.1       1.2   -0.09               R.IDSLRR.T ``` | |

|  |  |
| --- | --- |
| |  | | --- | | Top scoring peptide matches to query 991 64: Sum of 6 scans in range 393 (rt=23.7528, f=2, i=69) to 409 (rt=24.5493, f=2, i=72) [\\172.16.3.18\masslynx\2009.PRO\Data\20090917\_20\_qdda.raw] Score greater than 28 indicates identity  ``` Score    Expect   Delta  Hit  Protein Peptide  19.2      0.45   -0.04   56   Q9HC10 IDLENR  17.5      0.68   -0.09               IDISRR  12.7         2   -0.06               R.IIMNPR.L  11.8       2.5   -0.09   12   P02679 K.IIPFNR.L  11.4       2.7   -0.09               R.NPLLFR.C  10.6       3.3   -0.04               K.DLLQDR.H  10.6       3.3   -0.04               R.VEIQDR.G  10.4       3.5   -0.11               R.IMRIAR.I  10.3       3.5   -0.04               R.IDELNR.E  10.3       3.5   -0.04               R.IDQLDR.E ``` | |

|  |  |
| --- | --- |
| |  | | --- | | Top scoring peptide matches to query 992 48: Sum of 15 scans in range 318 (rt=20.0944, f=5, i=32) to 366 (rt=22.4578, f=3, i=54) [\\172.16.3.18\masslynx\2009.PRO\Data\20090916\_24\_qdda.raw] Score greater than 28 indicates identity  ``` Score    Expect   Delta  Hit  Protein Peptide  26.9     0.077   -0.04   56   Q9HC10 IDLENR  23.9      0.16   -0.08               IDISRR  18.8       0.5   -0.05               R.IIMNPR.L  17.4      0.69   -0.04               K.DLLQDR.H  17.4      0.69   -0.04               R.IDELNR.E  17.4      0.69   -0.04               R.IDQLDR.E  17.4      0.69   -0.04               R.VEIQDR.G  15.1       1.2   -0.08               K.DLIRSR.F  15.1       1.2   -0.08               R.DLISRR.I  15.1       1.2   -0.08               R.DLLRSR.G ``` | |

|  |  |
| --- | --- |
| |  | | --- | | Top scoring peptide matches to query 993 29: Sum of 54 scans in range 167 (rt=12.7713, f=3, i=20) to 318 (rt=20.1343, f=7, i=32) [\\172.16.3.18\masslynx\2009.PRO\Data\20090916\_16\_qdda.raw] Score greater than 28 indicates identity  ``` Score    Expect   Delta  Hit  Protein Peptide  26.8      0.08   -0.04   56   Q9HC10 IDLENR  23.7      0.16   -0.08               IDISRR  18.6      0.52   -0.05               R.IIMNPR.L  17.3      0.71   -0.04               K.DLLQDR.H  17.3      0.71   -0.04               R.IDELNR.E  17.3      0.71   -0.04               R.IDQLDR.E  17.3      0.71   -0.04               R.VEIQDR.G  14.9       1.2   -0.08               K.DLIRSR.F  14.9       1.2   -0.08               R.DLISRR.I  14.9       1.2   -0.08               R.DLLRSR.G ``` | |

|  |  |
| --- | --- |
| |  | | --- | | Top scoring peptide matches to query 994 95: Sum of 5 scans in range 420 (rt=25.101, f=5, i=40) to 437 (rt=25.9401, f=5, i=44) [\\172.16.3.18\masslynx\2009.PRO\Data\20090915\_13\_qdda.raw] Score greater than 28 indicates identity  ``` Score    Expect   Delta  Hit  Protein Peptide  19.4      0.43   -0.03   56   Q9HC10 IDLENR  17.7      0.64   -0.08               IDISRR  12.9         2   -0.05               R.IIMNPR.L  11.5       2.7   -0.08               R.NPLLFR.C  10.8       3.2   -0.03               K.DLLQDR.H  10.8       3.2   -0.03               R.VEIQDR.G  10.5       3.4   -0.03               R.IDELNR.E  10.5       3.4   -0.03               R.IDQLDR.E  10.3       3.6   -0.03               LASSEPR  10.2       3.6   -0.03               K.LEVNER.I ``` | |

|  |  |
| --- | --- |
| |  | | --- | | Top scoring peptide matches to query 995 64: Sum of 11 scans in range 404 (rt=24.2735, f=2, i=87) to 429 (rt=25.5049, f=2, i=92) [\\172.16.3.18\masslynx\2009.PRO\Data\20090930\_31\_qdda.raw] Score greater than 28 indicates identity  ``` Score    Expect   Delta  Hit  Protein Peptide  29.4     0.044   -0.03   56   Q9HC10 IDLENR  26.0     0.095   -0.08               IDISRR  20.7      0.32   -0.05               R.IIMNPR.L  19.1      0.46   -0.03               K.DLLQDR.H  19.1      0.46   -0.03               R.IDELNR.E  19.1      0.46   -0.03               R.IDQLDR.E  19.1      0.46   -0.03               R.VEIQDR.G  16.5      0.85   -0.08               K.DLIRSR.F  16.5      0.85   -0.08               R.DLISRR.I  16.5      0.85   -0.08               R.DLLRSR.G ``` | |

|  |  |
| --- | --- |
| |  | | --- | | Top scoring peptide matches to query 996 76: Sum of 2 scans in range 417 (rt=24.814, f=2, i=76) to 423 (rt=25.1126, f=2, i=77) [\\172.16.3.18\masslynx\2009.PRO\Data\20090915\_17\_qdda.raw] Score greater than 28 indicates identity  ``` Score    Expect   Delta  Hit  Protein Peptide  18.9      0.49   -0.02   56   Q9HC10 IDLENR  17.1      0.75   -0.07               IDISRR  12.6       2.1   -0.04               R.IIMNPR.L  10.9       3.1   -0.02               K.LEVNER.I  10.4       3.5   -0.02               K.DLLQDR.H  10.4       3.5   -0.02               R.VEIQDR.G  10.1       3.7   -0.02               R.VEIDQR.C  10.1       3.7   -0.07               K.IIMLNR.R  10.1       3.7   -0.02               R.IDELNR.E  10.1       3.7   -0.02               R.IDQLDR.E ``` | |

|  |  |
| --- | --- |
| |  | | --- | | Top scoring peptide matches to query 998 72: Sum of 3 scans in range 382 (rt=22.4775, f=2, i=36) to 391 (rt=22.9056, f=5, i=22) [\\172.16.3.18\masslynx\2009.PRO\Data\20090915\_25\_qdda.raw] Score greater than 19 indicates homology Score greater than 28 indicates identity  ``` Score    Expect   Delta  Hit  Protein Peptide   7.3         7   -0.06               IDISRR   7.3         7   -0.01   56   Q9HC10 IDLENR   7.3         7   -0.06               R.IVERSR.G   7.3         7   -0.01               K.LEVNER.I   7.3         7   -0.06               R.LVESRR.Q   7.1       7.3   -0.08               R.IMRIAR.I   7.1       7.4   -0.02               R.LAQGSGAR.G   7.0       7.5   -0.01               K.IQDLDR.R   7.0       7.5    0.05               R.LAGGHCR.R   7.0       7.5   -0.05               K.LAGTLER.G ``` | |

|  |  |
| --- | --- |
| |  | | --- | | Top scoring peptide matches to query 999 61: Sum of 2 scans in range 432 (rt=25.4999, f=2, i=109) to 438 (rt=25.7986, f=2, i=110) [\\172.16.3.18\masslynx\2009.PRO\Data\20090930\_36\_qdda.raw] Score greater than 28 indicates identity  ``` Score    Expect   Delta  Hit  Protein Peptide  17.4       0.7    0.00   56   Q9HC10 IDLENR  17.0      0.76   -0.02               R.IIMNPR.L  15.5       1.1   -0.05               IDISRR  14.2       1.4    0.00               LASSEPR  14.2       1.4   -0.06               K.LRFAPR.M  14.1       1.5   -0.06               R.IMRIAR.I  13.1       1.8    0.04               K.EPSSSPR.T  11.8       2.5   -0.05               R.IVERSR.G  11.8       2.5    0.00               K.LEVNER.I  11.8       2.5   -0.05               R.LVESRR.Q ``` | |

|  |  |
| --- | --- |
| |  | | --- | | Top scoring peptide matches to query 1000 81: Sum of 2 scans in range 409 (rt=24.5685, f=6, i=34) to 415 (rt=24.8672, f=6, i=35) [\\172.16.3.18\masslynx\2009.PRO\Data\20090916\_32\_qdda.raw] Score greater than 27 indicates homology Score greater than 28 indicates identity  ``` Score    Expect   Delta  Hit  Protein Peptide  22.3      0.22   -0.04               IDISRR  22.3      0.22    0.00   56   Q9HC10 IDLENR  13.5       1.7   -0.04               K.DLIRSR.F  13.5       1.7   -0.04               R.DLISRR.I  13.5       1.7    0.00               K.DLLQDR.H  13.5       1.7   -0.04               R.DLLRSR.G  13.5       1.7    0.00               R.IDELNR.E  13.5       1.7    0.00               R.IDQLDR.E  13.5       1.7   -0.04               K.IDRLSR.I  13.5       1.7   -0.04               R.IDSLRR.T ``` | |

|  |  |
| --- | --- |
| |  | | --- | | Top scoring peptide matches to query 1001 88: Sum of 4 scans in range 425 (rt=25.1249, f=2, i=78) to 448 (rt=26.2566, f=2, i=81) [\\172.16.3.18\masslynx\2009.PRO\Data\20090916\_40\_qdda.raw] Score greater than 28 indicates identity  ``` Score    Expect   Delta  Hit  Protein Peptide  26.7     0.082   -0.04               IDISRR  26.7     0.082    0.00   56   Q9HC10 IDLENR  17.1      0.73   -0.04               K.DLIRSR.F  17.1      0.73   -0.04               R.DLISRR.I  17.1      0.73    0.00               K.DLLQDR.H  17.1      0.73   -0.04               R.DLLRSR.G  17.1      0.73    0.00               R.VEIDQR.C  17.1      0.73    0.00               R.VEIQDR.G  14.6       1.3    0.00               R.IDELNR.E  14.6       1.3    0.00               R.IDQLDR.E ``` | |

|  |  |
| --- | --- |
| |  | | --- | | Top scoring peptide matches to query 1002 89: Sum of 4 scans in range 445 (rt=26.0623, f=2, i=93) to 454 (rt=26.5103, f=5, i=35) [\\172.16.3.18\masslynx\2009.PRO\Data\20090917\_12\_qdda.raw] Score greater than 28 indicates identity  ``` Score    Expect   Delta  Hit  Protein Peptide  26.6     0.082   -0.04               IDISRR  26.6     0.082    0.01   56   Q9HC10 IDLENR  19.2      0.46   -0.04   12   P02679 K.IIPFNR.L  17.1      0.74   -0.04               R.LPIFNR.I  17.1      0.74   -0.04               K.DLIRSR.F  17.1      0.74   -0.04               R.DLISRR.I  17.1      0.74    0.01               K.DLLQDR.H  17.1      0.74   -0.04               R.DLLRSR.G  17.1      0.74    0.01               R.VEIDQR.C  17.1      0.74    0.01               R.VEIQDR.G ``` | |

|  |  |
| --- | --- |
| |  | | --- | | Top scoring peptide matches to query 1003 53: Sum of 8 scans in range 406 (rt=24.2201, f=5, i=39) to 444 (rt=26.0985, f=2, i=77) [\\172.16.3.18\masslynx\2009.PRO\Data\20090930\_21\_qdda.raw] Score greater than 28 indicates identity  ``` Score    Expect   Delta  Hit  Protein Peptide  17.1      0.73    0.01   56   Q9HC10 IDLENR  15.3       1.1   -0.04               IDISRR  12.5       2.1   -0.01               R.IIMNPR.L  11.7       2.6    0.01               R.IDELNR.E  11.2       2.9   -0.04   12   P02679 K.IIPFNR.L  10.1       3.7    0.01               R.IDQLDR.E  10.0       3.8   -0.04               R.NPLLFR.C   9.0       4.8    0.01               K.DLLQDR.H   9.0       4.8    0.01               R.VEIQDR.G   8.7       5.1   -0.04               K.IDRLSR.I ``` | |

|  |  |
| --- | --- |
| |  | | --- | | Top scoring peptide matches to query 1004 80: Sum of 2 scans in range 444 (rt=25.9704, f=3, i=52) to 450 (rt=26.2691, f=3, i=53) [\\172.16.3.18\masslynx\2009.PRO\Data\20090916\_44\_qdda.raw] Score greater than 27 indicates homology Score greater than 28 indicates identity  ``` Score    Expect   Delta  Hit  Protein Peptide  15.9      0.96    0.01   56   Q9HC10 IDLENR  15.5       1.1   -0.04               IDISRR  13.3       1.8   -0.04               R.IVERSR.G  13.3       1.8    0.01               K.LEVNER.I  13.3       1.8   -0.04               R.LVESRR.Q  10.9       3.1   -0.04   12   P02679 K.IIPFNR.L   8.9       4.8    0.01               R.IDELNR.E   8.1       5.9   -0.04               K.DLIRSR.F   8.1       5.9   -0.04               R.DLISRR.I   8.1       5.9    0.01               K.DLLQDR.H ``` | |

|  |  |
| --- | --- |
| |  | | --- | | Top scoring peptide matches to query 1005 83: Sum of 2 scans in range 419 (rt=24.8202, f=2, i=74) to 425 (rt=25.1189, f=2, i=75) [\\172.16.3.18\masslynx\2009.PRO\Data\20090915\_\_05\_qdda.raw] Score greater than 23 indicates homology Score greater than 28 indicates identity  ``` Score    Expect   Delta  Hit  Protein Peptide  15.2       1.2   -0.03               IDISRR  15.2       1.2    0.01   56   Q9HC10 IDLENR   9.3       4.5   -0.05               R.IMRIAR.I   7.8       6.2   -0.03               K.DLIRSR.F   7.8       6.2   -0.03               R.DLISRR.I   7.8       6.2    0.01               K.DLLQDR.H   7.8       6.2   -0.03               R.DLLRSR.G   7.8       6.2    0.01               R.VEIDQR.C   7.8       6.2    0.01               R.VEIQDR.G   7.5       6.8   -0.03               R.IVERSR.G ``` | |

|  |  |
| --- | --- |
| |  | | --- | | Top scoring peptide matches to query 1006 49: Sum of 7 scans in range 297 (rt=19.0426, f=4, i=29) to 322 (rt=20.2742, f=2, i=56) [\\172.16.3.18\masslynx\2009.PRO\Data\20090916\_12\_qdda.raw] Score greater than 28 indicates identity  ``` Score    Expect   Delta  Hit  Protein Peptide  19.3      0.45    0.02   56   Q9HC10 IDLENR  17.5      0.67   -0.03               IDISRR  12.6       2.1   -0.00               R.IIMNPR.L  11.4       2.8   -0.04               R.NPLLFR.C  10.6       3.3    0.02               K.DLLQDR.H  10.6       3.3    0.02               R.VEIQDR.G  10.3       3.6    0.02               R.IDELNR.E  10.3       3.6    0.02               R.IDQLDR.E  10.2       3.7   -0.05               R.IMRIAR.I  10.1       3.7    0.02               LASSEPR ``` | |

|  |  |
| --- | --- |
| |  | | --- | | Top scoring peptide matches to query 1008 58: Sum of 11 scans in range 416 (rt=24.5635, f=2, i=111) to 471 (rt=27.2549, f=7, i=31) [\\172.16.3.18\masslynx\2009.PRO\Data\20090930\_41\_qdda.raw] Score greater than 28 indicates identity  ``` Score    Expect   Delta  Hit  Protein Peptide  20.2      0.36    0.02   56   Q9HC10 IDLENR  19.0      0.48    0.00               R.IIMNPR.L  18.4      0.55   -0.03               IDISRR  16.1      0.92    0.02               LASSEPR  16.1      0.92   -0.04               K.LRFAPR.M  13.6       1.6   -0.03               R.IVERSR.G  13.6       1.6    0.02               K.LEVNER.I  13.6       1.6   -0.03               R.LVESRR.Q  13.3       1.8    0.02               K.DLLQDR.H  12.6       2.1    0.04               K.ENLMPR.E ``` | |

|  |  |
| --- | --- |
| |  | | --- | | Top scoring peptide matches to query 1010 92: Sum of 4 scans in range 438 (rt=25.5936, f=2, i=93) to 448 (rt=26.0914, f=6, i=33) [\\172.16.3.18\masslynx\2009.PRO\Data\20090917\_08\_qdda.raw] Score greater than 28 indicates identity  ``` Score    Expect   Delta  Hit  Protein Peptide  26.6     0.083   -0.03               IDISRR  17.1      0.74   -0.03               K.DLIRSR.F  17.1      0.74   -0.03               R.DLISRR.I  17.1      0.74   -0.03               R.DLLRSR.G  17.1      0.74    0.02   56   Q9HC10 IDLENR  14.6       1.3    0.02               R.IDELNR.E  14.6       1.3    0.02               R.IDQLDR.E  14.6       1.3   -0.03               K.IDRLSR.I  14.6       1.3   -0.03               R.IDSLRR.T  14.6       1.3   -0.03               K.LDVRTR.G ``` | |

|  |  |
| --- | --- |
| |  | | --- | | Top scoring peptide matches to query 1011 31: Sum of 2 scans in range 207 (rt=14.7164, f=4, i=17) to 220 (rt=15.3505, f=4, i=18) [\\172.16.3.18\masslynx\2009.PRO\Data\20090915\_21\_qdda.raw] Score greater than 22 indicates homology Score greater than 28 indicates identity  ``` Score    Expect   Delta  Hit  Protein Peptide  17.8      0.63   -0.05   42   P02751 R.LTVGLTR.R   8.4       5.4    0.03               K.LEVNER.I   7.7       6.4   -0.01               K.LTELQR.D   7.7       6.4   -0.01               R.LTQLER.L   7.6       6.6    0.01               R.LAQGSGAR.G   7.3       7.1   -0.02               IDISRR   7.3       7.1    0.03   56   Q9HC10 IDLENR   7.3       7.1   -0.02               R.IVERSR.G   7.3       7.1   -0.02               R.LVESRR.Q   6.5       8.4    0.03               K.ITASPDR.C ``` | |

|  |  |
| --- | --- |
| |  | | --- | | Top scoring peptide matches to query 1012 45: Sum of 3 scans in range 281 (rt=18.2052, f=4, i=24) to 304 (rt=19.3239, f=7, i=29) [\\172.16.3.18\masslynx\2009.PRO\Data\20090915\_17\_qdda.raw] Score greater than 23 indicates homology Score greater than 28 indicates identity  ``` Score    Expect   Delta  Hit  Protein Peptide  19.9      0.39   -0.04   42   P02751 R.LTVGLTR.R   9.7       4.1   -0.01               K.LAETLGR.K   7.7       6.4   -0.04               K.LTLASVR.E   7.0       7.5   -0.02               IDISRR   7.0       7.5    0.03   56   Q9HC10 IDLENR   7.0       7.5   -0.02               R.IVERSR.G   7.0       7.5    0.03               K.LEVNER.I   7.0       7.5   -0.02               R.LVESRR.Q   6.1       9.3   -0.01               R.IEAASLR.L   6.1       9.3   -0.02               R.ILSRDR.N ``` | |

|  |  |
| --- | --- |
| |  | | --- | | Top scoring peptide matches to query 1013 67: Sum of 6 scans in range 413 (rt=24.5301, f=4, i=36) to 443 (rt=26.0105, f=3, i=54) [\\172.16.3.18\masslynx\2009.PRO\Data\20090917\_16\_qdda.raw] Score greater than 28 indicates identity  ``` Score    Expect   Delta  Hit  Protein Peptide  23.5      0.17   -0.02               IDISRR  23.5      0.17    0.03   56   Q9HC10 IDLENR  14.7       1.3   -0.02               K.DLIRSR.F  14.7       1.3   -0.02               R.DLISRR.I  14.7       1.3    0.03               K.DLLQDR.H  14.7       1.3   -0.02               R.DLLRSR.G  14.7       1.3    0.03               R.IDELNR.E  14.7       1.3    0.03               R.IDQLDR.E  14.7       1.3   -0.02               K.IDRLSR.I  14.7       1.3   -0.02               R.IDSLRR.T ``` | |

|  |  |
| --- | --- |
| |  | | --- | | Top scoring peptide matches to query 1014 87: Sum of 2 scans in range 435 (rt=25.2804, f=2, i=88) to 441 (rt=25.5791, f=2, i=89) [\\172.16.3.18\masslynx\2009.PRO\Data\20090917\_04\_qdda.raw] Score greater than 28 indicates identity  ``` Score    Expect   Delta  Hit  Protein Peptide  21.4      0.28   -0.02               R.NPLLFR.C  18.4      0.54   -0.02               IDISRR  18.4      0.54    0.03   56   Q9HC10 IDLENR  12.7         2    0.01               K.LVPQMR.K  11.5       2.7    0.03               K.LEVNER.I  11.3       2.8    0.05               R.EPDSRR.Q  11.3       2.8   -0.02               R.IAVGPFR.S  11.3       2.8   -0.03               R.LPRAFR.L  11.1         3    0.03               R.VEIDQR.C  11.1         3    0.03               R.VEIQDR.G ``` | |

|  |  |
| --- | --- |
| |  | | --- | | Top scoring peptide matches to query 1015 38: Sum of 13 scans in range 396 (rt=23.2169, f=2, i=114) to 419 (rt=24.3356, f=3, i=35) [\\172.16.3.18\masslynx\2009.PRO\Data\20090930\_46\_qdda.raw] Score greater than 28 indicates identity  ``` Score    Expect   Delta  Hit  Protein Peptide  20.2      0.36    0.03   56   Q9HC10 IDLENR  18.9      0.49    0.01               R.IIMNPR.L  18.4      0.55   -0.02               IDISRR  16.1      0.94    0.03               LASSEPR  16.1      0.94   -0.03               K.LRFAPR.M  13.8       1.6   -0.02   12   P02679 K.IIPFNR.L  13.6       1.7   -0.02               R.IVERSR.G  13.6       1.7    0.03               K.LEVNER.I  13.6       1.7   -0.02               R.LVESRR.Q  12.7         2    0.05               K.ENLMPR.E ``` | |

|  |  |
| --- | --- |
| |  | | --- | | Top scoring peptide matches to query 1016 46: Sum of 11 scans in range 354 (rt=21.9025, f=2, i=81) to 394 (rt=23.8671, f=3, i=48) [\\172.16.3.18\masslynx\2009.PRO\Data\20090930\_16\_qdda.raw] Score greater than 27 indicates homology Score greater than 28 indicates identity  ``` Score    Expect   Delta  Hit  Protein Peptide  16.4      0.86   -0.01               IDISRR  13.6       1.7    0.03   56   Q9HC10 IDLENR  12.5       2.1   -0.02               K.IIMLNR.R  12.5       2.1    0.01               R.IIMNPR.L  12.5       2.1   -0.02   12   P02679 K.IIPFNR.L  11.0         3    0.03               R.LELDGGR.V   9.3       4.5    0.03               LASSEPR   8.6       5.2   -0.03               K.LRFAPR.M   8.2       5.7   -0.01               K.DLIRSR.F   8.2       5.7   -0.01               R.DLISRR.I ``` | |

|  |  |
| --- | --- |
| |  | | --- | | Top scoring peptide matches to query 1017 25: Sum of 2 scans in range 151 (rt=11.9557, f=7, i=8) to 157 (rt=12.2544, f=7, i=9) [\\172.16.3.18\masslynx\2009.PRO\Data\20090917\_24\_qdda.raw] Score greater than 28 indicates identity  ``` Score    Expect   Delta  Hit  Protein Peptide  31.7     0.025   -0.04   42   P02751 R.LTVGLTR.R  17.2      0.73    0.02               R.GQQGLTR.E  16.0      0.95    0.02               R.DVRDVR.D  11.5       2.7   -0.04               K.IGISLTR.V  11.5       2.7   -0.04               LGISLTR  11.5       2.7   -0.00               K.LQEITR.C  11.5       2.7   -0.00               K.LQELTR.K  11.3       2.8    0.03               R.DPASLTR.G  10.8       3.2   -0.04               K.TVLGLTR.E  10.0       3.8    0.03               R.EPSGTLR.K ``` | |

|  |  |
| --- | --- |
| |  | | --- | | Top scoring peptide matches to query 1019 28: Sum of 2 scans in range 181 (rt=13.33, f=6, i=9) to 187 (rt=13.6286, f=6, i=10) [\\172.16.3.18\masslynx\2009.PRO\Data\20090930\_26\_qdda.raw] Score greater than 21 indicates homology Score greater than 28 indicates identity  ``` Score    Expect   Delta  Hit  Protein Peptide  12.5       2.1   -0.03   42   P02751 R.LTVGLTR.R   7.3         7    0.04               K.LEVNER.I   4.7        13    0.01               R.LTQLER.L   3.8        15    0.06               K.GRQNER.V   3.7        16   -0.03               K.IGISLTR.V   3.7        16   -0.03               LGISLTR   2.6        20    0.01               K.LQEITR.C   2.6        20    0.01               K.LQELTR.K   0.6        33   -0.01               K.DLIRSR.F   0.6        33   -0.01               R.DLISRR.I ``` | |

|  |  |
| --- | --- |
| |  | | --- | | Top scoring peptide matches to query 1020 25: Sum of 13 scans in range 388 (rt=22.6551, f=2, i=105) to 415 (rt=23.9599, f=3, i=33) [\\172.16.3.18\masslynx\2009.PRO\Data\20090930\_51\_qdda.raw] Score greater than 23 indicates homology Score greater than 28 indicates identity  ``` Score    Expect   Delta  Hit  Protein Peptide  10.8       3.1    0.04   56   Q9HC10 IDLENR   9.7         4    0.04               LASSEPR   9.6       4.1    0.02               R.IIMNPR.L   9.6       4.1   -0.02               R.IMRIAR.I   9.5       4.2    0.04               K.LEVNER.I   9.2       4.5   -0.01               R.NPLLFR.C   8.3       5.5   -0.01               IDISRR   8.3       5.5   -0.01               R.IVERSR.G   8.3       5.5   -0.01               R.LVESRR.Q   8.0       5.9   -0.02               K.LRFAPR.M ``` | |

|  |  |
| --- | --- |
| |  | | --- | | Top scoring peptide matches to query 1022 19: Sum of 2 scans in range 155 (rt=12.1058, f=6, i=10) to 161 (rt=12.4045, f=6, i=11) [\\172.16.3.18\masslynx\2009.PRO\Data\20090917\_16\_qdda.raw] Score greater than 18 indicates homology Score greater than 28 indicates identity  ``` Score    Expect   Delta  Hit  Protein Peptide   5.6        10   -0.03   42   P02751 R.LTVGLTR.R   5.2        11   -0.00               IDISRR   5.2        11   -0.00               R.IVERSR.G   5.2        11   -0.00               R.LVESRR.Q   5.1        12    0.05               K.ITASPDR.C   3.6        16    0.01               R.LTAALDR.L   3.6        16    0.01               K.LTELQR.D   3.6        16   -0.03               K.LTLASVR.E   3.6        16    0.01               R.LTQLER.L   1.2        28    0.02               R.RFSPPR.R ``` | |

|  |  |
| --- | --- |
| |  | | --- | | Top scoring peptide matches to query 1024 25: Sum of 2 scans in range 169 (rt=12.8652, f=3, i=11) to 175 (rt=13.1639, f=3, i=12) [\\172.16.3.18\masslynx\2009.PRO\Data\20090930\_31\_qdda.raw] Score greater than 23 indicates homology Score greater than 28 indicates identity  ``` Score    Expect   Delta  Hit  Protein Peptide  22.6       0.2   -0.01   42   P02751 R.LTVGLTR.R   8.8       4.9   -0.01               K.IGISLTR.V   8.8       4.9   -0.01               LGISLTR   8.8       4.9    0.02               K.LQEITR.C   8.8       4.9    0.02               K.LQELTR.K   8.7       5.1    0.05               R.DVRDVR.D   7.9       6.1    0.02               K.LTELQR.D   7.9       6.1    0.02               R.LTQLER.L   7.7       6.3    0.05               R.GQQGLTR.E   7.7       6.4    0.06               K.LEVNER.I ``` | |

|  |  |
| --- | --- |
| |  | | --- | | Top scoring peptide matches to query 1025 26: Scan 178 (rt=13.3073, f=2, i=49) [\\172.16.3.18\masslynx\2009.PRO\Data\20090930\_36\_qdda.raw] Score greater than 13 indicates homology Score greater than 28 indicates identity  ``` Score    Expect   Delta  Hit  Protein Peptide   4.4        13   -0.01   42   P02751 R.LTVGLTR.R   4.3        14    0.02               IDISRR   4.3        14    0.02               R.LVESRR.Q   0.7        31    0.03               R.ILVGDSR.G   0.7        32    0.02               R.DLISRR.I   0.4        34    0.02               K.DLIRSR.F   0.4        34    0.06               K.DLLQDR.H   0.4        34    0.02               R.DLLRSR.G   0.4        34    0.09               R.DPESRR.E ``` | |

|  |  |
| --- | --- |
| |  | | --- | | Top scoring peptide matches to query 1026 56: Sum of 4 scans in range 347 (rt=21.2905, f=3, i=33) to 362 (rt=22.0241, f=7, i=26) [\\172.16.3.18\masslynx\2009.PRO\Data\20090917\_12\_qdda.raw] Score greater than 19 indicates homology Score greater than 28 indicates identity  ``` Score    Expect   Delta  Hit  Protein Peptide  11.1       2.9   -0.00   42   P02751 R.LTVGLTR.R   5.5        10    0.02               R.IAVGPFR.S   3.5        17   -0.00               K.IGISLTR.V   3.5        17   -0.00               LGISLTR   3.5        17    0.03               K.LQEITR.C   3.5        17    0.03               K.LQELTR.K   3.0        19    0.02               IDISRR   3.0        19    0.02               R.IVERSR.G   3.0        19    0.02               R.LVESRR.Q   2.9        19   -0.00               K.TVLGLTR.E ``` | |

|  |  |
| --- | --- |
| |  | | --- | | Top scoring peptide matches to query 1028 30: Sum of 11 scans in range 358 (rt=20.973, f=2, i=55) to 382 (rt=22.0792, f=2, i=61) [\\172.16.3.18\masslynx\2009.PRO\Data\20090930\_56\_qdda.raw] Score greater than 20 indicates homology Score greater than 28 indicates identity  ``` Score    Expect   Delta  Hit  Protein Peptide   8.7       5.1    0.02   12   P02679 K.IIPFNR.L   7.4       6.7    0.02               R.NPLLFR.C   7.0       7.4    0.01               R.IMRIAR.I   7.0       7.5    0.02               IDISRR   7.0       7.5    0.02               R.IVERSR.G   7.0       7.5    0.02               R.LPIFNR.I   7.0       7.5    0.02               R.LVESRR.Q   4.1        14    0.02               R.IAVGPFR.S   4.1        14    0.01               R.LPRAFR.L   4.1        14    0.05               K.LVPQMR.K ``` | |

|  |  |
| --- | --- |
| |  | | --- | | Top scoring peptide matches to query 1060 77: Sum of 2 scans in range 440 (rt=26.0831, f=5, i=58) to 446 (rt=26.3818, f=5, i=59) [\\172.16.3.18\masslynx\2009.PRO\Data\20090916\_12\_qdda.raw] Score greater than 24 indicates homology Score greater than 32 indicates identity  ``` Score    Expect   Delta  Hit  Protein Peptide  34.0     0.033   -0.07   54   P02743 K.VFVFPR.E   9.2        10    0.02               K.TDEFPR.H   8.4        12    0.02               K.VNGCLGR.N   8.2        12   -0.00               K.VMDMIR.A   8.0        13   -0.05               R.RGHAAPR.A   7.2        16   -0.04               K.NVGRYR.E   6.1        20    0.07               K.CPVDER.E   6.1        20    0.01               K.GRCINR.V   5.2        25   -0.04               K.NLPQHR.F   4.7        28   -0.08               M.PAPRAPR.A ``` | |

|  |  |
| --- | --- |
| |  | | --- | | Top scoring peptide matches to query 1083 23: Sum of 2 scans in range 122 (rt=10.5944, f=3, i=7) to 128 (rt=10.8931, f=3, i=8) [\\172.16.3.18\masslynx\2009.PRO\Data\20090916\_32\_qdda.raw] Score greater than 25 indicates homology Score greater than 26 indicates identity  ``` Score    Expect   Delta  Hit  Protein Peptide  21.8      0.15   -0.10    2   P01024 K.VVPEGIR.M  11.5       1.6   -0.14               K.VVSVLPR.A   4.1       8.7   -0.03               K.VSSSSFR.Q   3.5        10   -0.12               K.VPERIR.R   3.5        10   -0.12               R.VPERLR.Q   3.5        10   -0.12               K.VRPELR.G   3.1        11   -0.07               R.TPGPELR.L   0.3        21   -0.06               R.VHPNFR.L ``` | |

|  |  |
| --- | --- |
| |  | | --- | | Top scoring peptide matches to query 1084 68: Sum of 2 scans in range 310 (rt=19.6976, f=4, i=35) to 316 (rt=19.9963, f=4, i=36) [\\172.16.3.18\masslynx\2009.PRO\Data\20090915\_13\_qdda.raw] Score greater than 16 indicates homology Score greater than 26 indicates identity  ``` Score    Expect   Delta  Hit  Protein Peptide  16.8      0.47   -0.09    2   P01024 K.VVPEGIR.M   3.1        11   -0.12               K.VVSVLPR.A ``` | |

|  |  |
| --- | --- |
| |  | | --- | | Top scoring peptide matches to query 1085 24: Sum of 2 scans in range 123 (rt=10.643, f=7, i=6) to 129 (rt=10.9417, f=7, i=7) [\\172.16.3.18\masslynx\2009.PRO\Data\20090916\_24\_qdda.raw] Score greater than 15 indicates homology Score greater than 26 indicates identity  ``` Score    Expect   Delta  Hit  Protein Peptide  11.8       1.5   -0.08    2   P01024 K.VVPEGIR.M   1.6        16    0.01               K.MGNIYR.T   0.8        19   -0.11               K.VVSVLPR.A ``` | |

|  |  |
| --- | --- |
| |  | | --- | | Top scoring peptide matches to query 1086 48: Sum of 2 scans in range 230 (rt=15.7605, f=4, i=19) to 236 (rt=16.0592, f=4, i=20) [\\172.16.3.18\masslynx\2009.PRO\Data\20090915\_09\_qdda.raw] Score greater than 26 indicates identity  ``` Score    Expect   Delta  Hit  Protein Peptide  22.3      0.13   -0.07    2   P01024 K.VVPEGIR.M  11.9       1.4   -0.11               K.VVSVLPR.A   4.0       9.1   -0.08               K.VPERIR.R   4.0       9.1   -0.08               R.VPERLR.Q   4.0       9.1   -0.08               K.VRPELR.G   3.7       9.6   -0.03               R.TPGPELR.L ``` | |

|  |  |
| --- | --- |
| |  | | --- | | Top scoring peptide matches to query 1087 22: Sum of 2 scans in range 131 (rt=10.9412, f=3, i=6) to 137 (rt=11.2399, f=3, i=7) [\\172.16.3.18\masslynx\2009.PRO\Data\20090916\_36\_qdda.raw] Score greater than 23 indicates homology Score greater than 26 indicates identity  ``` Score    Expect   Delta  Hit  Protein Peptide  19.7      0.24   -0.07    2   P01024 K.VVPEGIR.M   9.8       2.4   -0.11               K.VVSVLPR.A   3.5        10    0.00               K.VYSTGSR.A   3.1        11   -0.08               K.VPERIR.R   3.1        11   -0.08               R.VPERLR.Q   3.1        11   -0.08               K.VRPELR.G   1.5        16   -0.03               R.TPGPELR.L ``` | |

|  |  |
| --- | --- |
| |  | | --- | | Top scoring peptide matches to query 1088 12: Sum of 2 scans in range 130 (rt=10.8743, f=4, i=2) to 136 (rt=11.173, f=4, i=3) [\\172.16.3.18\masslynx\2009.PRO\Data\20090917\_16\_qdda.raw] Score greater than 24 indicates homology Score greater than 26 indicates identity  ``` Score    Expect   Delta  Hit  Protein Peptide  19.7      0.24   -0.06    2   P01024 K.VVPEGIR.M   9.8       2.4   -0.09               K.VVSVLPR.A   3.6       9.8    0.02               K.VSSSSFR.Q   2.5        13   -0.02               R.TPGPELR.L   2.1        14   -0.07               K.VPERIR.R   2.1        14   -0.07               R.VPERLR.Q   2.1        14   -0.07               K.VRPELR.G   0.5        20    0.09               K.ASSSDMR.T ``` | |

|  |  |
| --- | --- |
| |  | | --- | | Top scoring peptide matches to query 1092 23: Sum of 2 scans in range 155 (rt=12.1887, f=6, i=8) to 161 (rt=12.4874, f=6, i=9) [\\172.16.3.18\masslynx\2009.PRO\Data\20090930\_31\_qdda.raw] Score greater than 26 indicates identity  ``` Score    Expect   Delta  Hit  Protein Peptide  21.6      0.16   -0.04    2   P01024 K.VVPEGIR.M  12.6       1.2   -0.07               K.VVSVLPR.A   1.0        18   -0.12               R.VLRLIR.G   1.0        18   -0.12               R.VLRLLR.T ``` | |

|  |  |
| --- | --- |
| |  | | --- | | Top scoring peptide matches to query 1093 18: Sum of 2 scans in range 150 (rt=11.9398, f=3, i=12) to 156 (rt=12.2385, f=3, i=13) [\\172.16.3.18\masslynx\2009.PRO\Data\20090930\_36\_qdda.raw] Score greater than 23 indicates homology Score greater than 26 indicates identity  ``` Score    Expect   Delta  Hit  Protein Peptide  17.3      0.42   -0.03    2   P01024 K.VVPEGIR.M   9.8       2.4   -0.07               K.VVSVLPR.A   2.8        12    0.04               K.VSSSSFR.Q   2.6        12    0.04               K.VYSTGSR.A ``` | |

|  |  |
| --- | --- |
[truncated: 1,905,071 more chars]
