# Supplementary material for: Relative Quantification of Several Plasma Proteins during Liver Transplantation Surgery
Source: Hindawi journal article supplement (doi:10.1155/2011/248613), 2011-01-01
Supplement: f2 [file 248613.f2.pdf]

## ADDITIONAL FILES 4.

- Full labeling scheme of iTRAQ labels
- Waters-Micromass CapLC settings
- Depletion repeatability
- Sample comparison in depletion runs
- Example MS chromatogram

Full labeling scheme of iTRAQ labes:

|                     | 1st iTRAQ<br>experiment,<br>iTRAQ labels | 2nd iTRAQ<br>experiment,<br>iTRAQ labels | 3rd iTRAQ<br>experiment,<br>iTRAQ labels |
|---------------------|------------------------------------------|------------------------------------------|------------------------------------------|
| Patient 1. Arteria  | 113                                      | 113                                      |                                          |
| Patient 1. Porta    | 114                                      | 114                                      |                                          |
| Patient 1. Hepatica | 115                                      | 115                                      |                                          |
| Patient 2. Arteria  | 116                                      |                                          | 118                                      |
| Patient 2. Porta    | 117                                      |                                          | 119                                      |
| Patient 2. Hepatica | 118                                      |                                          | 121                                      |
| Patient 3. Arteria  |                                          | 116                                      | 115                                      |
| Patient 3. Porta    |                                          | 117                                      | 116                                      |
| Patient 3. Hepatica |                                          | 118                                      | 117                                      |
| Control sample      | 119                                      | 121                                      | 113                                      |

Three iTRAQ labeling experiments were performed followed by MS analysis. All patients sample were analyzed twice.

## Waters-Micromass CapLC settings:

### Waters CapLC Initial Conditions:

Method Type=Normal

Percentage A = 95.0

Percentage B = 5.0

Solvent Select = A1

Solvent Name A1 = 0.1% FA

Solvent Name A2 = Solvent A2

Solvent Name A3 = Solvent A3

Solvent Name B = 95% ACN, 0.1% FA

Total Flow(ul) = 5.000

Run Time (min) = 91.00

Low Pressure(psi) = 0.0

High Pressure(psi) = 4300.0

Aux Flow(ul) =1.000

Aux Low Pressure(psi) = 0.0

Aux High Pressure Aux(psi) = 4300.0

Column Temperature (°C) = 20.0

Temperature Range(°C) = 20.0

Column Name = Column

Pump Synchronisation = Off

Initial Switch 1 = Off

Initial Switch 2 = Off

Initial Stream Select = Position 1

Initial Vent Valve = System

Chart Recorder 1 = Percent B

Chart Recorder 2 = None

### Waters CapLC Gradient Timetable:

| Time  | Percent A | Percent B | Flow  | Curve |
|-------|-----------|-----------|-------|-------|
| 0.10  | 95.0      | 5.0       | 5.000 | 6     |
| 5.00  | 95.0      | 5.0       | 5.000 | 6     |
| 40.00 | 70.0      | 30.0      | 5.000 | 6     |
| 70.00 | 10.0      | 90.0      | 5.000 | 6     |
| 75.00 | 10.0      | 90.0      | 5.000 | 6     |

|       |      |     |       |   |
|-------|------|-----|-------|---|
| 76.00 | 95.0 | 5.0 | 5.000 | 6 |
| 91.00 | 95.0 | 5.0 | 5.000 | 6 |

Waters CapLC Auxiliary C Flow Timetable:

| Time | Flow   | Curve |
|------|--------|-------|
| 0.10 | 10.000 | 6     |
| 5.00 | 10.000 | 6     |
| 6.00 | 1.000  | 6     |

Waters CapLC Event Table:

| Time(min) | Event         | Action     | Parameter |
|-----------|---------------|------------|-----------|
| 5.00      | Stream Select | Position 2 |           |
| 90.00     | Stream Select | Position 1 |           |

Waters CapLC Autosampler Parameters:

Draw Height(mm) = 1  
 Draw Speed = Slow  
 Inject Type = uL Pickup  
 Flush Volume(ul) = 10.00  
 Use Head Space Pressure = No  
 Use Air Space Segment = No  
 Use Low Dispersion Mode = No  
 Wash Volume(ul) = 10.00  
 Sample Temperature(°C) = 15.00  
 Temperature Limit(°C) = 20.00

Waters CapLC Mix Method:

Mix Delay(mins) = 0.00  
 Mix Cycles = 1  
 Reagent A Position = 0  
 Reagent A Volume(ul) = 1.00  
 Reagent B Position = 0  
 Reagent B Volume(ul) = 1.00

## Mircomass QToF Ultima Global mass spectrometer parameters:

Parameters for C:\MassLynx\2009.PRO\ACQUDB\Ville\_90min\_NormalCE.EXP

|                         |                           |
|-------------------------|---------------------------|
| Temperature Correction  | Enabled                   |
| Temperature Coefficient | 71.700000                 |
| TDC Gain Control        | 0.0                       |
| TDC Amp Edge Control    | 0.0                       |
| Using 4 GHz TDC         | YES                       |
| Using TTP 4 GHz TDC     | YES                       |
| Maldi Plate File        |                           |
| Maldi ESI Position      | 3200.0                    |
| Maldi Laser Type        | 337SI                     |
| Maldi Laser Firing Rate | 1.0                       |
| Maldi Plate Speed       | 1.0                       |
| Maldi Pattern Filename  | C:\MassLynx\Qtof\line.ptn |
| Maldi Probe Motion Type | 0.0                       |

| Instrument Parameters - Function 1: | Set point | Actual |
|-------------------------------------|-----------|--------|
| Polarity                            | ES+       |        |
| Calibration                         | Dynamic 1 |        |
| Capillary                           | 2.40      | 2.40   |
| Cone1                               | 20        | 258    |
| RF Lens1 Energy                     | 120.0     |        |
| Aperture 1                          | 0.0       |        |
| RF Lens2 Energy                     | 1.0       |        |
| Source Temp (°C)                    | 80        | 59     |
| Desolvation Temp (°C)               | 20        | 1020   |
| Cone Gas Flow (L/Hr)                | 0         | OFF    |
| Desolvation Gas Flow (L/Hr)         | 0         | OFF    |
| LM Resolution                       | 7.0       |        |
| HM Resolution                       | 7.0       |        |
| Collision Energy                    | 10.0      | 10.9   |
| Ion Energy                          | 2.0       |        |
| Steering                            | -0.64     | -0.78  |
| Entrance                            | 65.0      | -66.2  |
| Pre-filter                          | 6.0       | 3.8    |
| Transport                           | 4.0       | -5.5   |
| Aperture3                           | 10.0      | -10.8  |
| Acceleration                        | 200       | -197   |
| Focus                               | 0         | -2     |
| Tube Lens                           | 110       | -115   |
| Offset1                             | -0.3      | -65.0  |
| Offset2                             | 0.0       | -65.3  |

|                            |           |       |
|----------------------------|-----------|-------|
| Pusher                     | 980       | 880   |
| TOF (kV)                   | 9.10      | -9.25 |
| Reflectron                 | 35.35     | 2.08  |
| Pusher Cycle Time (μs)     | Auto      |       |
| Pusher Frequency (Hz)      | 16129.03  |       |
| Multiplier                 | 650       | -648  |
| MCP                        | 2250      | 2239  |
| Centroid Threshold         | 0.0       |       |
| Min Points                 | 2.0       |       |
| Np Multiplier              | 0.70      |       |
| Resolution                 | 4000.0    |       |
| Lock Mass                  | 0.0000    |       |
| Mass Window +/-            | 1.0000    |       |
| Lteff                      | 1807.8000 |       |
| Veff                       | 9100.0000 |       |
|                            | 1.0000    |       |
| TDC Start (mV)             | 700.0000  |       |
| TDC Stop (mV)              | 35.0000   |       |
| TDC Threshold              | 0.0000    |       |
| Pirani Pressure(mbar)      | 4.07e0    |       |
| Penning Pressure(mbar)     | OFF       |       |
| Tof Penning Pressure(mbar) | 4.12e-7   |       |

#### Function Parameters - Function 1 - TOF SURVEY FUNCTION

##### [ACQUISITION]

|                   |          |
|-------------------|----------|
| Survey Start Time | 5.0      |
| Survey End Mass   | 90.0     |
| Survey Ion Mode   | ES Mode  |
| Survey Polarity   | Positive |

##### [MS SURVEY]

|                         |           |
|-------------------------|-----------|
| Survey Start Mass       | 400.0     |
| Survey End Mass         | 2000.0    |
| Intensity Threshold     | 10.0      |
| Survey Scan Time        | 2.4       |
| Survey Interscan Time   | 0.1       |
| Survey Data Format      | Continuum |
| Survey Use Tune Page CV | YES       |
| Survey Cone Voltage (V) | 35.0      |

##### [MS/MS]

|                                                                 |           |
|-----------------------------------------------------------------|-----------|
| MSMS Start Mass                                                 | 50.0      |
| MSMS End Mass                                                   | 2500.0    |
| Number of components                                            | 6         |
| MSMS to MS Switch Criteria Intensity<br>Falling Below Threshold |           |
| Switchback threshold (counts/second)                            | 5.0       |
| Use MSMS to MS Switch After Time                                | YES       |
| MSMS Switch After Time (sec)                                    | 10.0      |
| MSMS Scan Time (sec)                                            | 2.4       |
| MSMS Interscan Time (sec)                                       | 0.1       |
| MSMS Data Format                                                | Continuum |
| Use Tune Page Cone Voltage                                      | YES       |
| MSMS Cone Voltage (V)                                           | 35.0      |
| Use MS/MS ipr File                                              | NO        |
| MSMS Instrument Parameter Filename                              |           |

#### [PEAK DETECTION]

|                                |       |
|--------------------------------|-------|
| Peak Detection Window          | 1.0   |
| Use Include By Charge State    | YES   |
| Charge State(s)                | 2,3,4 |
| Number Of Include Components   | 60    |
| Charge State Tolerance Window  | 3.0   |
| Charge State Extraction Window | 2.0   |
| Discard survey data            | NO    |

#### [COLLISION ENERGY]

|                                  |                                                    |
|----------------------------------|----------------------------------------------------|
| Use Charge State Recognition     | YES                                                |
| Maximum Charge State             | 4                                                  |
| Charge State 1 Filename          | C:\MassLynx\Service.PRO\ACQUDB\Default_CS_1_CE.txt |
| Charge State 2 Filename          | C:\MassLynx\Service.PRO\ACQUDB\Default_CS_1_CE.txt |
| Charge State 3 Filename          | C:\MassLynx\Default.pro\Acqudb\Default_CS_2_CE.txt |
| Charge State 4 Filename          | C:\MassLynx\Default.pro\Acqudb\Default_CS_3_CE.txt |
| Charge State 5 Filename          | C:\MassLynx\Default.pro\Acqudb\Default_CS_4_CE.txt |
| Charge State 6 Filename          |                                                    |
| CS Recognition Components        | 60.0                                               |
| CS Recognition Tolerance Window  | 3.0                                                |
| CS Recognition Extraction Window | 2.0                                                |

#### [INCLUDE]

|                     |            |
|---------------------|------------|
| Precursor Selection | Everything |
|---------------------|------------|

[EXCLUDE]

|                               |       |
|-------------------------------|-------|
| Use Exclude Masses List       | NO    |
| Exclude Mass Range            |       |
| Use Exclude File Masses       | NO    |
| Exclude Mass Filename         |       |
| Exclude Window +/- (mDa)      | 100.0 |
| Exclude Retention Time Window | 10.0  |

[ADDUCTS]

|                        |    |
|------------------------|----|
| Use Adduct File Masses | NO |
| Adduct Filename        |    |

[VARIABLE FLOW]

|                   |     |
|-------------------|-----|
| Use Variable Flow | NO  |
| Port Number       | 1.0 |

| Instrument Parameters - Function 2: | Set point | Actual |
|-------------------------------------|-----------|--------|
| Polarity                            | ES+       |        |
| Calibration                         | Dynamic 2 |        |
| Capillary                           | 2.40      | 2.40   |
| Cone                                | 120       | 258    |
| RF Lens1 Energy                     | 120.0     |        |
| Aperture 1                          | 0.0       |        |
| RF Lens2 Energy                     | 1.0       |        |
| Source Temp (°C)                    | 80        | 59     |
| Desolvation Temp (°C)               | 20        | 1020   |
| Cone Gas Flow (L/Hr)                | 0         | OFF    |
| Desolvation Gas Flow (L/Hr)         | 0         | OFF    |
| LM Resolution                       | 7.0       |        |
| HM Resolution                       | 7.0       |        |
| Collision Energy                    | 10.0      | 10.9   |
| Ion Energy                          | 2.0       |        |
| Steering                            | -0.64     | -0.78  |
| Entrance                            | 65.0      | -66.2  |
| Pre-filter                          | 6.0       | 3.8    |
| Transport                           | 4.0       | -5.5   |
| Aperture3                           | 10.0      | -10.8  |
| Acceleration                        | 200       | -197   |
| Focus                               | 0         | -2     |
| Tube Lens                           | 110       | -115   |
| Offset1                             | -0.3      | -65.0  |
| Offset2                             | 0.0       | -65.3  |
| Pusher                              | 980       | 880    |
| TOF (kV)                            | 9.10      | -9.25  |

|                            |           |      |
|----------------------------|-----------|------|
| Reflectron                 | 35.35     | 2.08 |
| Pusher Cycle Time (µs)     | Auto      |      |
| Pusher Frequency (Hz)      | 11363.64  |      |
| Multiplier                 | 650       | -648 |
| MCP                        | 2250      | 2239 |
| Centroid Threshold         | 0.0       |      |
| Min Points                 | 2.0       |      |
| Np Multiplier              | 0.70      |      |
| Resolution                 | 4000.0    |      |
| Lock Mass                  | 0.0000    |      |
| Mass Window +/-            | 1.0000    |      |
| Lteff                      | 1807.8000 |      |
| Veff                       | 9100.0000 |      |
|                            | 1.0000    |      |
| TDC Start (mV)             | 700.0000  |      |
| TDC Stop (mV)              | 35.0000   |      |
| TDC Threshold              | 0.0000    |      |
| Pirani Pressure(mbar)      | 4.07e0    |      |
| Penning Pressure(mbar)     | OFF       |      |
| Tof Penning Pressure(mbar) | 4.12e-7   |      |

#### Function Parameters - Function 2 - TOF SURVEY FUNCTION

|                                |                                            |
|--------------------------------|--------------------------------------------|
| Set Mass                       | 0.0                                        |
| Start Mass                     | 50.0                                       |
| End Mass                       | 2500.0                                     |
| Start Time (mins)              | 5.0                                        |
| End Time (mins)                | 90.0                                       |
| Data Format                    | Continuum                                  |
| Ion Mode                       | ES Mode                                    |
| Polarity                       | Positive                                   |
| Instrument Parameter Filename  |                                            |
|                                | C:\MassLynx\2009.PRO\ACQUDB\jdwvpos_Q3.ipr |
| Scans To Sum                   | 16960                                      |
| Scan Time (sec)                | 2.4                                        |
| Interscan Time (sec)           | 0.1                                        |
| Use Tune Page Collision Energy | YES                                        |
| Collision Energy (eV)          | 429.2                                      |
| Use Tune Page Cone Voltage     | YES                                        |
| Cone Voltage (V)               | 35.0                                       |

| Instrument Parameters - Function 3: | Set point | Actual |
|-------------------------------------|-----------|--------|
| Polarity                            | ES+       |        |
| Calibration                         | Dynamic 2 |        |
| Capillary                           | 2.40      | 2.40   |



|                             |           |       |
|-----------------------------|-----------|-------|
| Cone                        | 120       | 258   |
| RF Lens1 Energy             | 120.0     |       |
| Aperture 1                  | 0.0       |       |
| RF Lens2 Energy             | 1.0       |       |
| Source Temp (°C)            | 80        | 59    |
| Desolvation Temp (°C)       | 20        | 1020  |
| Cone Gas Flow (L/Hr)        | 0         | OFF   |
| Desolvation Gas Flow (L/Hr) | 0         | OFF   |
| LM Resolution               | 7.0       |       |
| HM Resolution               | 7.0       |       |
| Collision Energy            | 10.0      | 10.9  |
| Ion Energy                  | 2.0       |       |
| Steering                    | -0.64     | -0.78 |
| Entrance                    | 65.0      | -66.2 |
| Pre-filter                  | 6.0       | 3.8   |
| Transport                   | 4.0       | -5.5  |
| Aperture3                   | 10.0      | -10.8 |
| Acceleration                | 200       | -197  |
| Focus                       | 0         | -2    |
| Tube Lens                   | 110       | -115  |
| Offset1                     | -0.3      | -65.0 |
| Offset2                     | 0.0       | -65.3 |
| Pusher                      | 980       | 880   |
| TOF (kV)                    | 9.10      | -9.25 |
| Reflectron                  | 35.35     | 2.08  |
| Pusher Cycle Time (µs)      | Auto      |       |
| Pusher Frequency (Hz)       | 11363.64  |       |
| Multiplier                  | 650       | -648  |
| MCP                         | 2250      | 2239  |
| Centroid Threshold          | 0.0       |       |
| Min Points                  | 2.0       |       |
| Np Multiplier               | 0.70      |       |
| Resolution                  | 4000.0    |       |
| Lock Mass                   | 0.0000    |       |
| Mass Window +/-             | 1.0000    |       |
| Lteff                       | 1807.8000 |       |
| Veff                        | 9100.0000 |       |
|                             | 1.0000    |       |
| TDC Start (mV)              | 700.0000  |       |
| TDC Stop (mV)               | 35.0000   |       |
| TDC Threshold               | 0.0000    |       |
| Pirani Pressure(mbar)       | 4.07e0    |       |
| Penning Pressure(mbar)      | OFF       |       |
| Tof Penning Pressure(mbar)  | 4.12e-7   |       |

# Function Parameters - Function 3 - TOF SURVEY FUNCTION

|                                |                                            |
|--------------------------------|--------------------------------------------|
| Set Mass                       | 0.0                                        |
| Start Mass                     | 50.0                                       |
| End Mass                       | 2500.0                                     |
| Start Time (mins)              | 5.0                                        |
| End Time (mins)                | 90.0                                       |
| Data Format                    | Continuum                                  |
| Ion Mode                       | ES Mode                                    |
| Polarity                       | Positive                                   |
| Instrument Parameter Filename  | C:\MassLynx\2009.PRO\ACQUDB\jdwvpos_Q3.ipr |
| Scans To Sum                   | 16960                                      |
| Scan Time (sec)                | 2.4                                        |
| Interscan Time (sec)           | 0.1                                        |
| Use Tune Page Collision Energy | YES                                        |
| Collision Energy (eV)          | 451.3                                      |
| Use Tune Page Cone Voltage     | YES                                        |
| Cone Voltage (V)               | 35.0                                       |

| Instrument Parameters - Function 4: | Set point | Actual |
|-------------------------------------|-----------|--------|
| Polarity                            | ES+       |        |
| Calibration                         | Dynamic 2 |        |
| Capillary                           | 2.40      | 2.40   |
| Cone                                | 120       | 258    |
| RF Lens1 Energy                     | 120.0     |        |
| Aperture 1                          | 0.0       |        |
| RF Lens2 Energy                     | 1.0       |        |
| Source Temp (°C)                    | 80        | 59     |
| Desolvation Temp (°C)               | 20        | 1020   |
| Cone Gas Flow (L/Hr)                | 0         | OFF    |
| Desolvation Gas Flow (L/Hr)         | 0         | OFF    |
| LM Resolution                       | 7.0       |        |
| HM Resolution                       | 7.0       |        |
| Collision Energy                    | 10.0      | 10.9   |
| Ion Energy                          | 2.0       |        |
| Steering                            | -0.64     | -0.78  |
| Entrance                            | 65.0      | -66.2  |
| Pre-filter                          | 6.0       | 3.8    |
| Transport                           | 4.0       | -5.5   |
| Aperture3                           | 10.0      | -10.8  |
| Acceleration                        | 200       | -197   |
| Focus                               | 0         | -2     |
| Tube Lens                           | 110       | -115   |
| Offset1                             | -0.3      | -65.0  |
| Offset2                             | 0.0       | -65.3  |

|                            |           |       |
|----------------------------|-----------|-------|
| Pusher                     | 980       | 880   |
| TOF (kV)                   | 9.10      | -9.25 |
| Reflectron                 | 35.35     | 2.08  |
| Pusher Cycle Time (µs)     | Auto      |       |
| Pusher Frequency (Hz)      | 11363.64  |       |
| Multiplier                 | 650       | -648  |
| MCP                        | 2250      | 2239  |
| Centroid Threshold         | 0.0       |       |
| Min Points                 | 2.0       |       |
| Np Multiplier              | 0.70      |       |
| Resolution                 | 4000.0    |       |
| Lock Mass                  | 0.0000    |       |
| Mass Window +/-            | 1.0000    |       |
| Lteff                      | 1807.8000 |       |
| Veff                       | 9100.0000 |       |
|                            | 1.0000    |       |
| TDC Start (mV)             | 700.0000  |       |
| TDC Stop (mV)              | 35.0000   |       |
| TDC Threshold              | 0.0000    |       |
| Pirani Pressure(mbar)      | 4.07e0    |       |
| Penning Pressure(mbar)     | OFF       |       |
| Tof Penning Pressure(mbar) | 4.12e-7   |       |

#### Function Parameters - Function 4 - TOF SURVEY FUNCTION

|                                |                                             |
|--------------------------------|---------------------------------------------|
| Set Mass                       | 0.0                                         |
| Start Mass                     | 50.0                                        |
| End Mass                       | 2500.0                                      |
| Start Time (mins)              | 5.0                                         |
| End Time (mins)                | 90.0                                        |
| Data Format                    | Continuum                                   |
| Ion Mode                       | ES Mode                                     |
| Polarity                       | Positive                                    |
| Instrument Parameter Filename  | C:\MassLynx\2009.PRO\ACQUODB\jdwvpos_Q3.ipr |
| Scans To Sum                   | 16960                                       |
| Scan Time (sec)                | 2.4                                         |
| Interscan Time (sec)           | 0.1                                         |
| Use Tune Page Collision Energy | YES                                         |
| Collision Energy (eV)          | 434.2                                       |
| Use Tune Page Cone Voltage     | YES                                         |
| Cone Voltage (V)               | 35.0                                        |

|                                     |           |        |
|-------------------------------------|-----------|--------|
| Instrument Parameters - Function 5: | Set point | Actual |
| Polarity                            | ES+       |        |
| Calibration                         | Dynamic 2 |        |

|                             |           |       |
|-----------------------------|-----------|-------|
| Capillary                   | 2.40      | 2.40  |
| Cone                        | 120       | 258   |
| RF Lens1 Energy             | 120.0     |       |
| Aperture 1                  | 0.0       |       |
| RF Lens2 Energy             | 1.0       |       |
| Source Temp (°C)            | 80        | 59    |
| Desolvation Temp (°C)       | 20        | 1020  |
| Cone Gas Flow (L/Hr)        | 0         | OFF   |
| Desolvation Gas Flow (L/Hr) | 0         | OFF   |
| LM Resolution               | 7.0       |       |
| HM Resolution               | 7.0       |       |
| Collision Energy            | 10.0      | 10.9  |
| Ion Energy                  | 2.0       |       |
| Steering                    | -0.64     | -0.78 |
| Entrance                    | 65.0      | -66.2 |
| Pre-filter                  | 6.0       | 3.8   |
| Transport                   | 4.0       | -5.5  |
| Aperture3                   | 10.0      | -10.8 |
| Acceleration                | 200       | -197  |
| Focus                       | 0         | -2    |
| Tube Lens                   | 110       | -115  |
| Offset1                     | -0.3      | -65.0 |
| Offset2                     | 0.0       | -65.3 |
| Pusher                      | 980       | 880   |
| TOF (kV)                    | 9.10      | -9.25 |
| Reflectron                  | 35.35     | 2.08  |
| Pusher Cycle Time (µs)      | Auto      |       |
| Pusher Frequency (Hz)       | 11363.64  |       |
| Multiplier                  | 650       | -648  |
| MCP                         | 2250      | 2239  |
| Centroid Threshold          | 0.0       |       |
| Min Points                  | 2.0       |       |
| Np Multiplier               | 0.70      |       |
| Resolution                  | 4000.0    |       |
| Lock Mass                   | 0.0000    |       |
| Mass Window +/-             | 1.0000    |       |
| Lteff                       | 1807.8000 |       |
| Veff                        | 9100.0000 |       |
|                             | 1.0000    |       |
| TDC Start (mV)              | 700.0000  |       |
| TDC Stop (mV )              | 35.0000   |       |
| TDC Threshold               | 0.0000    |       |
| Pirani Pressure(mbar)       | 4.07e0    |       |
| Penning Pressure(mbar)      | OFF       |       |
| Tof Penning Pressure(mbar)  | 4.12e-7   |       |

# Function Parameters - Function 5 - TOF SURVEY FUNCTION

|                                |                                            |
|--------------------------------|--------------------------------------------|
| Set Mass                       | 0.0                                        |
| Start Mass                     | 50.0                                       |
| End Mass                       | 2500.0                                     |
| Start Time (mins)              | 5.0                                        |
| End Time (mins)                | 90.0                                       |
| Data Format                    | Continuum                                  |
| Ion Mode                       | ES Mode                                    |
| Polarity                       | Positive                                   |
| Instrument Parameter Filename  | C:\MassLynx\2009.PRO\ACQUDB\jdwvpos_Q3.ipr |
| Scans To Sum                   | 16960                                      |
| Scan Time (sec)                | 2.4                                        |
| Interscan Time (sec)           | 0.1                                        |
| Use Tune Page Collision Energy | YES                                        |
| Collision Energy (eV)          | 413.8                                      |
| Use Tune Page Cone Voltage     | YES                                        |
| Cone Voltage (V)               | 35.0                                       |

| Instrument Parameters - Function 6: | Set point | Actual |
|-------------------------------------|-----------|--------|
| Polarity                            | ES+       |        |
| Calibration                         | Dynamic 2 |        |
| Capillary                           | 2.40      | 2.40   |
| Cone                                | 120       | 258    |
| RF Lens1 Energy                     | 120.0     |        |
| Aperture 1                          | 0.0       |        |
| RF Lens2 Energy                     | 1.0       |        |
| Source Temp (°C)                    | 80        | 59     |
| Desolvation Temp (°C)               | 20        | 1020   |
| Cone Gas Flow (L/Hr)                | 0         | OFF    |
| Desolvation Gas Flow (L/Hr)         | 0         | OFF    |
| LM Resolution                       | 7.0       |        |
| HM Resolution                       | 7.0       |        |
| Collision Energy                    | 10.0      | 10.9   |
| Ion Energy                          | 2.0       |        |
| Steering                            | -0.64     | -0.78  |
| Entrance                            | 65.0      | -66.2  |
| Pre-filter                          | 6.0       | 3.8    |
| Transport                           | 4.0       | -5.5   |
| Aperture3                           | 10.0      | -10.8  |
| Acceleration                        | 200       | -197   |
| Focus                               | 0         | -2     |
| Tube Lens                           | 110       | -115   |

|                            |           |       |
|----------------------------|-----------|-------|
| Offset1                    | -0.3      | -65.0 |
| Offset2                    | 0.0       | -65.3 |
| Pusher                     | 980       | 880   |
| TOF (kV)                   | 9.10      | -9.25 |
| Reflectron                 | 35.35     | 2.08  |
| Pusher Cycle Time (μs)     | Auto      |       |
| Pusher Frequency (Hz)      | 11363.64  |       |
| Multiplier                 | 650       | -648  |
| MCP                        | 2250      | 2239  |
| Centroid Threshold         | 0.0       |       |
| Min Points                 | 2.0       |       |
| Np Multiplier              | 0.70      |       |
| Resolution                 | 4000.0    |       |
| Lock Mass                  | 0.0000    |       |
| Mass Window +/-            | 1.0000    |       |
| Lteff                      | 1807.8000 |       |
| Veff                       | 9100.0000 |       |
|                            | 1.0000    |       |
| TDC Start (mV)             | 700.0000  |       |
| TDC Stop (mV)              | 35.0000   |       |
| TDC Threshold              | 0.0000    |       |
| Pirani Pressure(mbar)      | 4.07e0    |       |
| Penning Pressure(mbar)     | OFF       |       |
| Tof Penning Pressure(mbar) | 4.12e-7   |       |

#### Function Parameters - Function 6 - TOF SURVEY FUNCTION

|                                |                                            |
|--------------------------------|--------------------------------------------|
| Set Mass                       | 0.0                                        |
| Start Mass                     | 50.0                                       |
| End Mass                       | 2500.0                                     |
| Start Time (mins)              | 5.0                                        |
| End Time (mins)                | 90.0                                       |
| Data Format                    | Continuum                                  |
| Ion Mode                       | ES Mode                                    |
| Polarity                       | Positive                                   |
| Instrument Parameter Filename  | C:\MassLynx\2009.PRO\ACQUDB\jdwvpos_Q3.ipr |
| Scans To Sum                   | 16960                                      |
| Scan Time (sec)                | 2.4                                        |
| Interscan Time (sec)           | 0.1                                        |
| Use Tune Page Collision Energy | YES                                        |
| Collision Energy (eV)          | 427.8                                      |
| Use Tune Page Cone Voltage     | YES                                        |
| Cone Voltage (V)               | 35.0                                       |

| Instrument Parameters - Function 7: | Set point | Actual |
|-------------------------------------|-----------|--------|
| Polarity                            | ES+       |        |
| Calibration                         | Dynamic 2 |        |
| Capillary                           | 2.40      | 2.40   |
| Cone                                | 120       | 258    |
| RF Lens1 Energy                     | 120.0     |        |
| Aperture 1                          | 0.0       |        |
| RF Lens2 Energy                     | 1.0       |        |
| Source Temp (°C)                    | 80        | 59     |
| Desolvation Temp (°C)               | 20        | 1020   |
| Cone Gas Flow (L/Hr)                | 0         | OFF    |
| Desolvation Gas Flow (L/Hr)         | 0         | OFF    |
| LM Resolution                       | 7.0       |        |
| HM Resolution                       | 7.0       |        |
| Collision Energy                    | 10.0      | 10.6   |
| Ion Energy                          | 2.0       |        |
| Steering                            | -0.64     | -0.78  |
| Entrance                            | 65.0      | -66.2  |
| Pre-filter                          | 6.0       | 3.8    |
| Transport                           | 4.0       | -5.5   |
| Aperture3                           | 10.0      | -10.8  |
| Acceleration                        | 200       | -197   |
| Focus                               | 0         | -2     |
| Tube Lens                           | 110       | -115   |
| Offset1                             | -0.3      | -65.0  |
| Offset2                             | 0.0       | -65.3  |
| Pusher                              | 980       | 880    |
| TOF (kV)                            | 9.10      | -9.25  |
| Reflectron                          | 35.35     | 2.08   |
| Pusher Cycle Time (µs)              | Auto      |        |
| Pusher Frequency (Hz)               | 11363.64  |        |
| Multiplier                          | 650       | -648   |
| MCP                                 | 2250      | 2239   |
| Centroid Threshold                  | 0.0       |        |
| Min Points                          | 2.0       |        |
| Np Multiplier                       | 0.70      |        |
| Resolution                          | 4000.0    |        |
| Lock Mass                           | 0.0000    |        |
| Mass Window +/-                     | 1.0000    |        |
| Lteff                               | 1807.8000 |        |
| Veff                                | 9100.0000 |        |
|                                     | 1.0000    |        |
| TDC Start (mV)                      | 700.0000  |        |
| TDC Stop (mV )                      | 35.0000   |        |
| TDC Threshold                       | 0.0000    |        |

|                            |         |
|----------------------------|---------|
| Pirani Pressure(mbar)      | 4.07e0  |
| Penning Pressure(mbar)     | OFF     |
| Tof Penning Pressure(mbar) | 4.15e-7 |

Function Parameters - Function 7 - TOF SURVEY FUNCTION

|                                            |           |
|--------------------------------------------|-----------|
| Set Mass                                   | 0.0       |
| Start Mass                                 | 50.0      |
| End Mass                                   | 2500.0    |
| Start Time (mins)                          | 5.0       |
| End Time (mins)                            | 90.0      |
| Data Format                                | Continuum |
| Ion Mode                                   | ES Mode   |
| Polarity                                   | Positive  |
| Instrument Parameter Filename              |           |
| C:\MassLynx\2009.PRO\ACQUDB\jdwvpos_Q3.ipr |           |
| Scans To Sum                               | 16960     |
| Scan Time (sec)                            | 2.4       |
| Interscan Time (sec)                       | 0.1       |
| Use Tune Page Collision Energy             | YES       |
| Collision Energy (eV)                      | 589.3     |
| Use Tune Page Cone Voltage                 | YES       |
| Cone Voltage (V)                           | 35.0      |



Depletion repeatability:

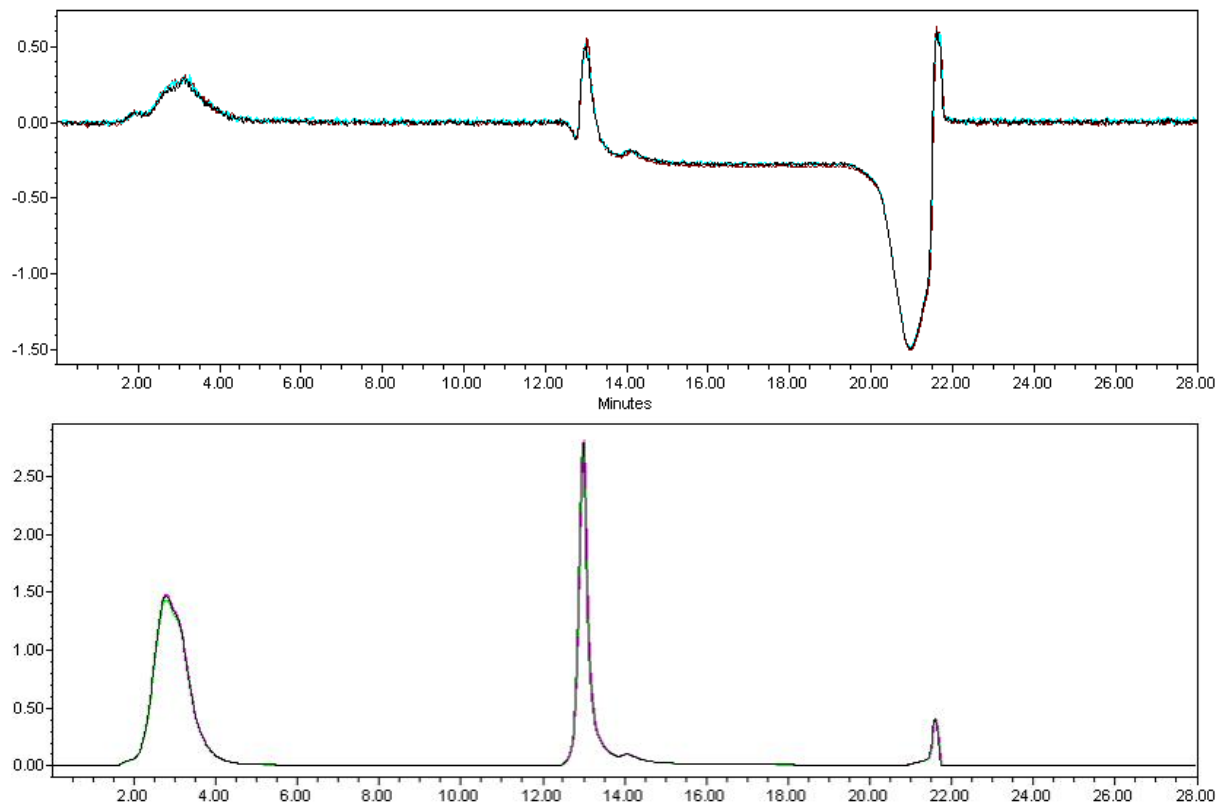

Overlaid depletion chromatograms at absorbance wavelength 204 (upper chromatogram) and at 280 (lower chromatogram) from three consecutive plasma high abundance protein depletion runs of one patient arterial sample. Each run is represented as different color. Low-to-medium abundance proteins collected from 1.5min to 5 minutes

Sample to sample comparison in depletion runs:

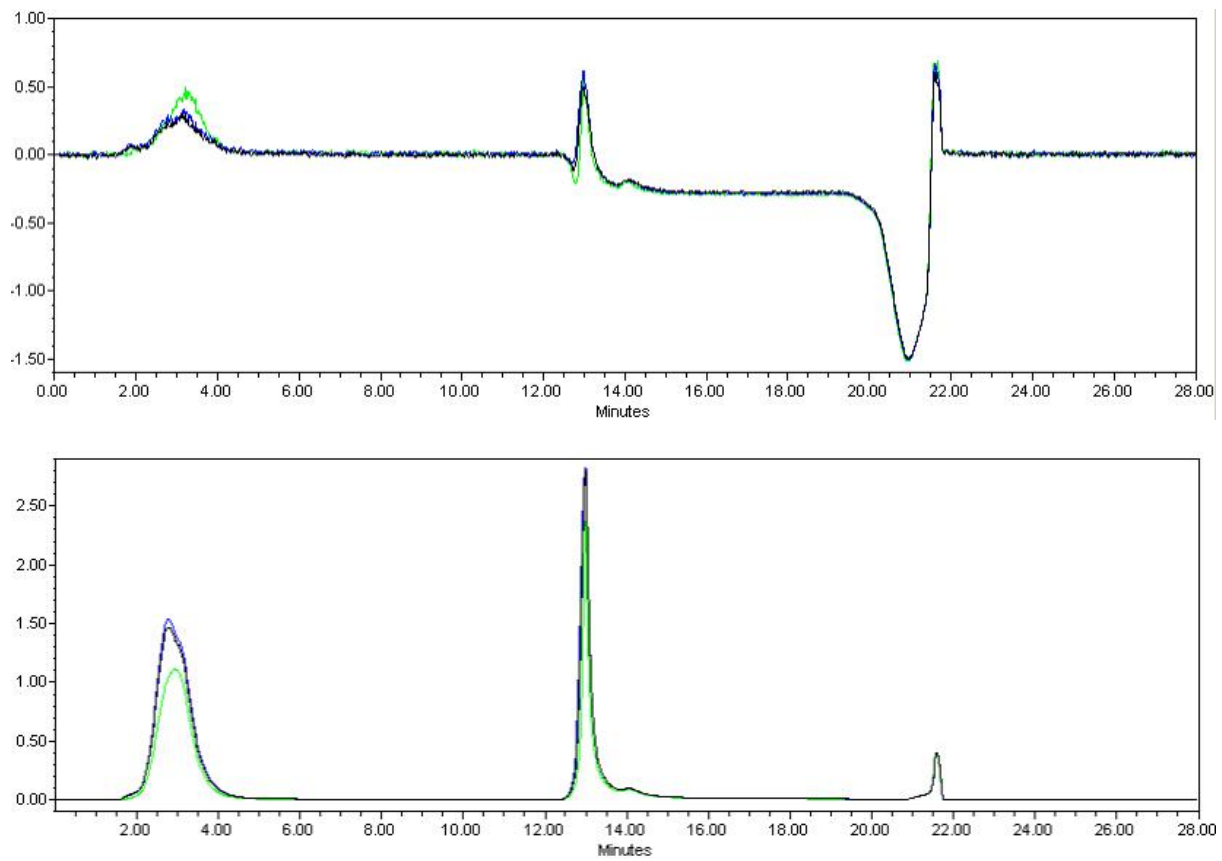

Overlaid depletion chromatograms at absorbance wavelength 204 (upper chromatogram) and at 280 (lower chromatogram) from plasma high abundance protein depletion runs of one patient arterial, portal and hepatic samples. Arterial sample in black, portal in blue and hepatic in green. Low-to-medium abundance proteins collected from 1.5min to 5 minutes.

## Example MS chromatogram:

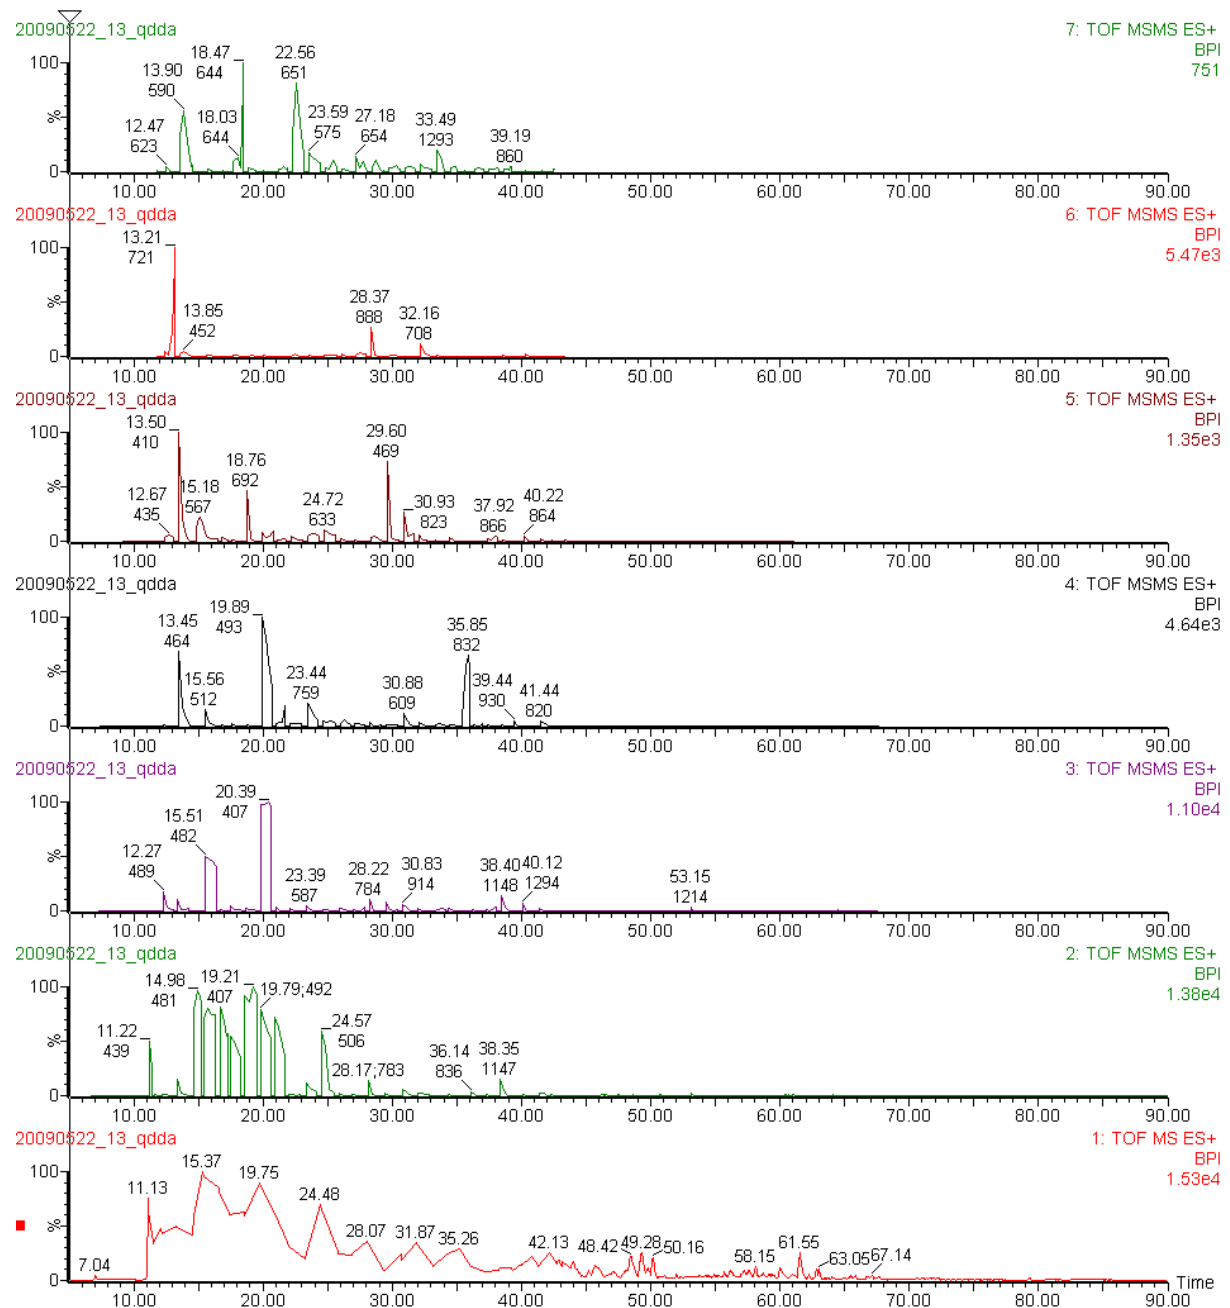

Representative MS-chromatogram of one SCX fraction of one iTRAQ experiment. The six MSMS functions are represented in upper five chromatograms and the MS survey scan in the bottom chromatogram. All chromatograms are represented as base peak intensity values.
